# Supplementary material for: Gut-brain axis neurodegeneration in a Drosophila model of Parkinson’s disease is linked to mitochondrial dysfunction
Source: Research Square preprint supplement (doi:10.21203/rs.3.rs-100637/v1), 2020-12-16
Supplement: Supplementary file 1 [file 365035f1aebdb3f120bcfe61.xlsx]

## Sheet: Supplemetary_Table1_FDRv02
name	Flybase_link	Gene_Symbol	CG_number	Flybase_ID	Family	homology_and_biology	Column..	Probeset.ID	gene_assignment	RefSeq		Fold_Change_Young	p_val_Young	p_Adj_BH_Young_Transcriptomics	Fold_Change_Aged	p_val_Aged	p_Adj_BH_Aged_Transcriptomics	Fold_Change_Proteomics	p_Adj_BH_Proteomics
Sensory neuron membrane protein 1	CG7000	Snmp1	CG7000	FBgn0260004	CD36/croquemort (crq) family : 9 members	more related to sensory neuron membrane protein- involved in pherormon sensing	13035	18202699	NM_142696 // Snmp1 // Sensory neuron membrane protein 1 // 93C2-93C2 // 42514 /// NM_00	NM_142696		2.46029	3.55e-14	1.31689e-11	2.63241	5.15e-15	2.27185e-12	NA	NA
PGRP-SC2	CG14745	PGRP-SC2	CG14745	FBgn0043575	Peptidoglycan recognition protein (PGRP) family : 13 members	PGRP with amidase activity-In vivo, may down-regulate the Imd pathway in the hemolymph	4357	18153188	FBtr0088709 // PGRP-SC2 // CG14745 gene product from transcript CG14745-RA // 44E2-44E2	FBtr0088709		-1.03928	0.914948	0.961052	-1.17464	0.655921	0.769935	NA	NA
PGRP-SC1b	CG8577	PGRP-SC1b	CG8577	FBgn0033327	Peptidoglycan recognition protein (PGRP) family : 13 members	PGRP with amidase activity-In vivo, may down-regulate the Imd pathway in the gut, other function (digestive) possible	4358	18153190	FBtr0088707 // PGRP-SC1b // CG8577 gene product from transcript CG8577-RA // 44E2-44E2	FBtr0088707		9.24193	1.19e-06	3.57701e-05	2.95794	0.00628743	0.0214022	NA	NA
PGRP-SC1b	CG8577	PGRP-SC1b	CG8577	FBgn0033327	Peptidoglycan recognition protein (PGRP) family : 13 members	PGRP with amidase activity-In vivo, may down-regulate the Imd pathway in the gut, other function (digestive) possible	3692	18149558	FBtr0088708 // PGRP-SC1b // CG8577 gene product from transcript CG8577-RA // 44E2-44E2	FBtr0088708		2.5016	0.000112828	0.00152197	1.48951	0.0641015	0.137271	NA	NA
PGRP-SB1	CG9681	PGRP-SB1	CG9681	FBgn0043578	Peptidoglycan recognition protein (PGRP) family : 13 members	PGRP with amidase activity- Deletion of PGRP-SB1/SB2 has not phenotype suggesting an effector function	8994	18179723	FBtr0075348 // PGRP-SB1 // CG9681 gene product from transcript CG9681-RA // 73C1-73C1 /	FBtr0075348		-1.06645	0.777902	0.895625	1.10184	0.670937	0.78233	0.000460257	0
PGRP-SD	CG7496	PGRP-SD	CG7496	FBgn0035806	Peptidoglycan recognition protein (PGRP) family : 13 members	secreted PGRP required for Toll activation by DAP-type peptidoglycan	6909	18168283	FBtr0076807 // PGRP-SD // CG7496 gene product from transcript CG7496-RA // 66A8-66A8 //	FBtr0076807		2.45875	5.09e-06	0.00012093	2.02365	0.000152795	0.00109575	23.3346	0.017
Peptidoglycan recognition protein LF	CG4437	PGRP-LF	CG4437	FBgn0035977	Peptidoglycan recognition protein (PGRP) family : 13 members	Negative regulator of the Imd pathway	6964	18168587	FBtr0076439 // PGRP-LF // Peptidoglycan recognition protein LF // 67B1-67B1 // 39064 //	FBtr0076439		1.2563	0.0303299	0.115825	1.41646	0.00158106	0.00701633	NA	NA
Scavenger receptor class C, type II	CG8856	Sr-CII	CG8856	FBgn0020377	Drosophila scavenger receptor (dScR) family: 4 members	-	5079	18157459	NM_079981 // Sr-CII // Scavenger receptor class C, type II // 48E10-48E10 // 44219 ///	NM_079981		2.5856	1.87e-05	0.000353675	2.60785	1.64e-05	0.000180378	NA	NA
Nimrod C1	CG8942	nimC1	CG8942	FBgn0259896	Nimrod/Eater/Draper family of phagocytosis receptors with EGF repeats	shown to be required for phagocytosis of bacteria	3104	18146095	FBtr0310075 // nimC1 // nimrod C1 // 34E5-34E5 // 34816 /// FBtr0080615 // nimC1 // nim	FBtr0310075		6.24776	2.74e-19	4.06566e-16	6.5384	1.35e-19	2.1367e-16	NA	NA
CG11459	CG11459	CG11459	CG11459	FBgn0037396	Lysosomal enzymes	encodes a Cathepsin L	11781	18195703	FBtr0078623 // CG11459 // CG11459 gene product from transcript CG11459-RA // 83D2-83D2	FBtr0078623		1.84149	0.0348962	0.128023	1.26922	0.395583	0.547457	1.1298	0.82
lectin-24A	CG3410	lectin-24A	CG3410	FBgn0040104	III. Encapsulation: Genes linked to encapsulation	induced upon encapulation	2774	18144307	FBtr0077539 // lectin-24A // CG3410 gene product from transcript CG3410-RA // 24C1-24C1	FBtr0077539		2.00582	0.00301675	0.0205079	1.44365	0.0995754	0.194039	NA	NA
lectin-37Da	CG33532	lectin-37Da	CG33532	FBgn0053532	III. Encapsulation: Genes linked to encapsulation	lectin-galC1 like protein that enhance encapsulation	1451	18137060	FBtr0091498 // lectin-37Da // CG33532 gene product from transcript CG33532-RA // 37D6-3	FBtr0091498		4.69946	4.72e-08	2.33454e-06	2.0234	0.00268734	0.0107244	NA	NA
poor Imd response upon knock-in	CG15678	pirk	CG15678	FBgn0034647	Genes encoding canonic components of the Imd pathway	Negative regulator of the Imd pathway	5748	18161522	FBtr0071682 // pirk // poor Imd response upon knock-in // 57F6-57F6 // 37468 /// NM_137	FBtr0071682		1.42336	0.0624541	0.190859	1.8596	0.00188975	0.0080576	NA	NA
Peptidoglycan recognition protein LF	CG4437	PGRP-LF	CG4437	FBgn0035977	Genes encoding canonic components of the Imd pathway	Negative regulator of the Imd pathway	6964	18168587	FBtr0076439 // PGRP-LF // Peptidoglycan recognition protein LF // 67B1-67B1 // 39064 //	FBtr0076439		1.2563	0.0303299	0.115825	1.41646	0.00158106	0.00701633	NA	NA
MstProx	CG1149	MstProx	CG1149	FBgn0015770	Genes encoding homologs of mammalian components of the IL1-R/TLR or TNF signalling pathways but has not yet been implicated in the immune response	-	11569	18194526	FBtr0081585 // MstProx // CG1149 gene product from transcript CG1149-RA // 84D5-84D5 //	FBtr0081585		2.12136	3.05e-05	0.00053186	1.61001	0.00422002	0.0155168	NA	NA
unpaired 2	CG5988	upd2	CG5988	FBgn0030904	Genes encoding components of the JAK/STAT pathway	ligand of Domeless, induced by infection in the gut	15385	18216175	FBtr0300182 // upd2 // unpaired 2 // 17A3-17A3 // 32805 /// NM_133049 // upd2 // unpair	FBtr0300182		1.51897	0.0531828	0.17091	1.84513	0.00606859	0.0208396	NA	NA
unpaired 3	CG33542	upd3	CG33542	FBgn0053542	Genes encoding components of the JAK/STAT pathway	ligand of Domeless. Produced by hemocyte and invovled in the JAK-STAT activation in the fat-body.	14455	18210749	FBtr0113465 // upd3 // unpaired 3 // 17A4-17A4 // 3346149 /// NM_001103544 // upd3 // u	FBtr0113465		1.9032	0.00645193	0.0368469	2.38559	0.000423675	0.00243477	NA	NA
Diedel	CG11501	Diedel	CG11501	FBgn0039666	Genes encoding components of the JAK/STAT pathway	putative negative regulator of the JAK-STAT pathway, found to be induced in S2	10659	18188961	FBtr0085426 // Diedel // CG11501 gene product from transcript CG11501-RA // 99B1-99B1 /	FBtr0085426		2.58728	0.0615332	0.189018	12.6026	1.32e-05	0.000152477	NA	NA
prophenol oxidase A1	CG5779	proPO-A1	CG5779	FBgn0261362	proPOphenoloxidase family: 3 members	expressed in crystal cells	6253	18164357	NM_057464 // proPO-A1 // prophenol oxidase A1 // 54F6-54F6|2-79.6 cM // 37044 /// FBtr0	NM_057464		7.21456	1.51e-15	9.12823e-13	1.79215	0.000136736	0.000999465	NA	NA
prophenoloxidase 45	CG8193	proPO45	CG8193	FBgn0033367	proPOphenoloxidase family: 3 members	expressed in crystal cells	5315	18159139	NM_136599 // proPO45 // prophenoloxidase 45 // 45A1-45A1 // 35910 /// FBtr0088663 // pr	NM_136599		5.01949	9.26e-14	2.90657e-11	1.18048	0.203571	0.336918	NA	NA
CG5550	CG5550	CG5550	CG5550	FBgn0034160	Putative coagulation factors	Fibrinogen-like	3960	18151111	FBtr0308764 // CG5550 // CG5550 gene product from transcript CG5550-RB // 53D10-53D10 /	FBtr0308764		2.48545	5.14e-05	0.000809017	2.28843	0.000171951	0.00119926	12.4165	0.012
Lysozyme X	CG9120	LysX	CG9120	FBgn0004431	Lysozyme (lys) family: 13 members including 1 gene encoding a protein with 4 lysozyme domains.): probably involved in digestion	expressed in the midgut and may aid digestion.	7993	18174309	FBtr0072637 // LysX // Lysozyme X // 61F3-61F3 // 38122 /// NM_079157 // LysX // Lysozy	FBtr0072637		1.8953	0.0368286	0.133006	2.10495	0.0163219	0.0464527	NA	NA
Lysozyme D	CG9118	LysD	CG9118	FBgn0004427	Lysozyme (lys) family: 13 members including 1 gene encoding a protein with 4 lysozyme domains.): probably involved in digestion	expressed in the midgut and may aid digestion.	7991	18174305	FBtr0072634 // LysD // Lysozyme D // 61F3-61F3 // 38127 /// NM_057475 // LysD // Lysozy	FBtr0072634		1.3834	0.224819	0.44821	1.13607	0.629795	0.750384	NA	NA
Attacin-A	CG10146	AttA	CG10146	FBgn0012042	Attacins: 4 members	encodes an antibacterial peptide and is induced by infection	3433	18147926	FBtr0087437 // AttA // Attacin-A // 51C1-51C1 // 36636 /// NM_079021 // AttA // Attacin	FBtr0087437		2.46648	0.0397248	0.140496	2.35043	0.0507558	0.11411	12.6474	0.297
Attacin-B	CG18372	AttB	CG18372	FBgn0041581	Attacins: 4 members	encodes an antibacterial peptide and is induced by infection	4342	18153109	FBtr0300942 // AttB // Attacin-B // 51C1-51C1 // 36637 /// NM_001169681 // AttB // Atta	FBtr0300942		-1.3097	0.449373	0.678197	1.11914	0.751388	0.838976	NA	NA
Attacin-D	CG7629	AttD	CG7629	FBgn0038530	Attacins: 4 members	encodes an antibacterial peptide and is induced by infection	10276	18186810	FBtr0083470 // AttD // Attacin-D // 90B6-90B6 // 42122 /// NM_079667 // AttD // Attacin	FBtr0083470		1.09812	0.648949	0.824945	1.07828	0.713776	0.813535	NA	NA
Diptericin	CG12763	Dpt	CG12763	FBgn0004240	Diptericin (dpt) family: 2 members	encodes an antibacterial peptide and is induced by infection	3369	18147462	NM_057460 // Dpt // Diptericin // 55F8-55F8 // 37183 /// FBtr0086620 // Dpt // Dipteric	NM_057460		-1.02517	0.97506	0.989796	1.85602	0.438911	0.589331	NA	NA
Diptericin B	CG10794	DptB	CG10794	FBgn0034407	Diptericin (dpt) family: 2 members	encodes an antibacterial peptide and is induced by infection	4041	18151514	NM_079063 // DptB // Diptericin B // 55F8-55F8 // 37184 /// FBtr0086621 // DptB // Dipt	NM_079063		1.28847	0.637594	0.817118	1.31766	0.608282	0.733425	NA	NA
Cecropin B	CG1878	CecB	CG1878	FBgn0000278	Cecropin (cec) family: 4 members	encodes a peptide with both antibacterial and antifungal peptide and is induced by infection	11328	18192934	FBtr0085640 // CecB // Cecropin B // 99E2-99E2 // 43598 /// NM_079851 // CecB // Cecrop	FBtr0085640		-1.01815	0.940505	0.974636	1.32962	0.242495	0.383203	NA	NA
Drosomycin	CG10810	Drs	CG10810	FBgn0010381	Drosomycin (drs) family: 6 members	encodes an antifungal peptide and is induced by infection	6524	18165909	FBtr0073073 // Drs // Drosomycin // 63D2-63D2 // 38419 /// NM_079177 // Drs // Drosomyc	FBtr0073073		1.80798	0.232682	0.457791	2.14082	0.127825	0.236094	30.4789	0.284
Drosomycin-like 3	CG32283	Drsl3	CG32283	FBgn0052283	Drosomycin (drs) family: 6 members	drs-like	7534	18171454	FBtr0073060 // Drsl3 // Drosomycin-like 3 // 63D1-63D1 // 317955 /// NM_168020 // Drsl3	FBtr0073060		1.63913	0.0310593	0.11795	2.99982	2.02e-05	0.000214094	NA	NA
Drosomycin-like 4	CG32282	Drsl4	CG32282	FBgn0052282	Drosomycin (drs) family: 6 members	drs-like	7533	18171452	FBtr0073061 // Drsl4 // Drosomycin-like 4 // 63D1-63D1 // 317954 /// NM_168021 // Drsl4	FBtr0073061		20.8621	8.7e-20	1.57779e-16	12.0219	2.66e-17	2.41203e-14	404.576	0
Drosomycin-like 5	CG10812	Drsl5	CG10812	FBgn0035434	Drosomycin (drs) family: 6 members	drs-like	6798	18167590	FBtr0073062 // Drsl5 // Drosomycin-like 5 // 63D1-63D1 // 38409 /// NM_139546 // Drsl5	FBtr0073062		3.04412	1.24e-09	1.01196e-07	4.16905	3.62e-12	6.21954e-10	53.4564	0.002
Drosocin	CG10816	Dro	CG10816	FBgn0010388	other AMPs	encodes an antibacterial peptide and is induced by infection	3403	18147693	FBtr0309055 // Dro // Drosocin // 51C1-51C1 // 36635 /// NM_001259395 // Dro // Drosoci	FBtr0309055		1.18227	0.654362	0.828138	1.50208	0.280448	0.426844	NA	NA
Metchnikowin	CG8175	Mtk	CG8175	FBgn0014865	other AMPs	encodes a peptide with both antifungal and antibacterial activity and is induced by infection	3453	18148051	FBtr0087386 // Mtk // Metchnikowin // 52A1-52A1 // 36708 /// NM_079028 // Mtk // Metchn	FBtr0087386		2.10906	0.154291	0.352758	1.65924	0.329441	0.479417	NA	NA
Listericin	CG9080	Listericin	CG9080	FBgn0033593	other AMPs	encodes an antimicrobial peptide (regulated by Imd in Degregorio 2002 or by JAK-STAT in Goto 2011	5386	18159575	FBtr0088191 // Listericin // CG9080 gene product from transcript CG9080-RA // 47E1-47E1	FBtr0088191		1.04817	0.766907	0.890542	2.14486	3.3e-05	0.00031947	NA	NA
Methyltransferase 2	CG10692	Mt2	CG10692	FBgn0028707	Components of the RNAi pathway provides an antiviral defense	The RNA methyltransferase Dnmt2 is required for efficient innate immune responses	621	18132586	NM_058127 // Mt2 // Methyltransferase 2 // 33C4-33C4 // 34632 /// FBtr0080329 // Mt2 //	NM_058127		-1.0342	0.810588	0.913087	1.23928	0.133228	0.243374	3.0903	0.299
Turandot A	CG31509	TotA	CG31509	FBgn0028396	Stress factors	induced after various stress conditions including infection	9783	18184257	FBtr0083971 // TotA // Turandot A // 93A2-93A2 // 44121 /// NM_080517 // TotA // Turand	FBtr0083971		4.42405	1.34e-05	0.000272033	2.82245	0.0010865	0.00519293	14.3549	0.028
Turandot C	CG31508	TotC	CG31508	FBgn0044812	Stress factors	-	10794	18189725	FBtr0083972 // TotC // Turandot C // 93A2-93A2 // 117462 /// NM_080518 // TotC // Turan	FBtr0083972		11.8673	5.58e-05	0.000867398	9.07789	0.000233369	0.00152179	237.137	0.007
Turandot M	CG14027	TotM	CG14027	FBgn0031701	Stress factors	-	846	18133769	FBtr0079073 // TotM // Turandot M // 25D6-25D6 // 33764 /// NM_078758 // TotM // Turand	FBtr0079073		1.84053	0.065255	0.196584	2.52978	0.00667153	0.0224799	NA	NA
CG6639	CG6639	CG6639	CG6639	FBgn0032638	Other Induced serine proteases	serine protease-like	2654	18143664	FBtr0081004 // CG6639 // CG6639 gene product from transcript CG6639-RA // 36C9-36C9 //	FBtr0081004		1.78416	0.340093	0.575412	2.53245	0.130086	0.238999	NA	NA
CG18563	CG18563	CG18563	CG18563	FBgn0032639	Other Induced serine proteases	serine protease-like	2655	18143667	FBtr0300902 // CG18563 // CG18563 gene product from transcript CG18563-RB // 36C9-36C9	FBtr0300902		1.37885	0.283937	0.515738	1.47314	0.198184	0.33028	NA	NA
CG9733	CG9733	CG9733	CG9733	FBgn0039759	Other Induced serine proteases	close homolog of the proPAE gene	12611	18200333	FBtr0085638 // CG9733 // CG9733 gene product from transcript CG9733-RA // 99E3-99E3 //	FBtr0085638		1.13295	0.606397	0.79631	5.87187	2.6e-08	9.62295e-07	NA	NA
CG3505	CG3505	CG3505	CG3505	FBgn0038250	Other Induced serine proteases	close homolog of the proPAE gene	10174	18186332	FBtr0082966 // CG3505 // CG3505 gene product from transcript CG3505-RA // 88C10-88C10 /	FBtr0082966		1.04214	0.674432	0.838759	1.2816	0.0159644	0.0456661	1.76604	0.08
Serpin 88Eb	CG6687	Spn88Eb	CG6687	FBgn0038299	Other Induced serpins	serpin-like	12091	18197505	FBtr0083140 // Spn88Eb // Serpin 88Eb // 88E3-88E3 // 41829 /// NM_142170 // Spn88Eb //	FBtr0083140		-1.24395	0.21805	0.440099	1.39682	0.0634731	0.136242	NA	NA
Immune induced molecule 1	CG18108	IM1	CG18108	FBgn0034329	Induced small peptides (40-134aa)	IM2-like	4019	18151399	NM_137475 // IM1 // Immune induced molecule 1 // 55C4-55C4 // 37100 /// FBtr0086662 //	NM_137475		3.93141	3.38e-09	2.48506e-07	2.41781	1.04e-05	0.000125647	NA	NA
Immune induced molecule 23	CG15066	IM23	CG15066	FBgn0034328	Induced small peptides (40-134aa)	-	5643	18160937	NM_137474 // IM23 // Immune induced molecule 23 // 55C4-55C4 // 37099 /// FBtr0086729 /	NM_137474		9.13179	1.74e-05	0.000332946	6.71741	0.000129422	0.000958016	198153	0.001
CG5791	CG5791	CG5791	CG5791	FBgn0040582	Induced small peptides (40-134aa)	-	10760	18189512	FBtr0084180 // CG5791 // CG5791 gene product from transcript CG5791-RB // 94A2-94A2 //	FBtr0084180		2.02734	0.000849021	0.00757667	-1.00339	0.986003	0.990759	NA	NA
CG14957	CG14957	CG14957	CG14957	FBgn0035412	Induced small peptides (40-134aa)	chitin-binding?	6787	18167509	FBtr0073038 // CG14957 // CG14957 gene product from transcript CG14957-RA // 63B10-63B1	FBtr0073038		2.93124	3.63e-08	1.88092e-06	9.0644	1.16e-15	7.28212e-13	NA	NA
Immune induced molecule 2	CG18106	IM2	CG18106	FBgn0025583	Induced small peptides (40-134aa)	-	3528	18148567	NM_166277 // IM2 // Immune induced molecule 2 // 55C4-55C4 // 49802 /// FBtr0086664 //	NM_166277		3.39769	1.09e-07	4.83451e-06	2.46976	1.75e-05	0.000189539	NA	NA
CG4269	CG4269	CG4269	CG4269	FBgn0034741	Induced small peptides (40-134aa)	-	4175	18152233	FBtr0071854 // CG4269 // CG4269 gene product from transcript CG4269-RA // 58F1-58F1 //	FBtr0071854		2.47847	8.25e-05	0.00117913	2.05589	0.00110672	0.00526902	NA	NA
CG9928	CG9928	CG9928	CG9928	FBgn0032472	Induced small peptides (40-134aa)	-	2603	18143412	FBtr0080496 // CG9928 // CG9928 gene product from transcript CG9928-RA // 34A6-34A6 //	FBtr0080496		2.29566	2.74e-07	1.03764e-05	1.57294	0.00122234	0.00570621	2.43781	0.07
CG17107	CG17107	CG17107	CG17107	FBgn0032281	Induced small peptides (40-134aa)	-	1044	18134874	FBtr0080107 // CG17107 // CG17107 gene product from transcript CG17107-RB // 32A4-32A4	FBtr0080107		2.99269	2.43e-05	0.000441676	2.19941	0.00120623	0.0056575	0.0191426	0
CG15065	CG15065	CG15065	CG15065	FBgn0040734	Induced small peptides (40-134aa)	IM2-like	4321	18153023	FBtr0086667 // CG15065 // CG15065 gene product from transcript CG15065-RA // 55C4-55C4	FBtr0086667		2.86315	7.74e-05	0.00112696	1.90627	0.00890511	0.0285054	NA	NA
CG9616	CG9616	CG9616	CG9616	FBgn0038214	Induced small peptides (40-134aa)	-	12063	18197333	FBtr0300059 // CG9616 // CG9616 gene product from transcript CG9616-RB // 88B1-88B1 //	FBtr0300059		4.19454	1.79e-08	1.03238e-06	3.65341	1.31e-07	3.68652e-06	NA	NA
CG9701	CG9701	CG9701	CG9701	FBgn0036659	Induced genes encoding a protein with an homolog in other species	9e-68 mouse glycosyl hydrolase klotho	7192	18169682	FBtr0075321 // CG9701 // CG9701 gene product from transcript CG9701-RA // 73C2-73C2 //	FBtr0075321		-1.07489	0.705156	0.856684	2.26158	0.000151081	0.00108441	NA	NA
Urate oxidase	CG7171	Uro	CG7171	FBgn0003961	Induced genes encoding a protein with an homolog in other species	3e-65 mouse urate oxydase	414	18131170	NM_057431 // Uro // Urate oxidase // 28C3-28C3 // 34060 /// FBtr0079486 // Uro // Urate	NM_057431		1.08301	0.721763	0.864871	2.50768	0.00024524	0.00158659	45.3942	0
Gadd45	CG11086	Gadd45	CG11086	FBgn0033153	Induced genes encoding a protein with an homolog in other species	4e-09 human growth arrest and DNA-damage-inducible protein GADD45gamma	3645	18149279	FBtr0089049 // Gadd45 // CG11086 gene product from transcript CG11086-RA // 43A2-43A2 /	FBtr0089049		2.19347	1.81e-07	7.46031e-06	1.20822	0.117924	0.221899	NA	NA
Arc2	CG13941	Arc2	CG13941	FBgn0033928	Induced genes encoding a protein with an homolog in other species	5e-06 mouse growth factor ARC	3886	18150644	FBtr0087547 // Arc2 // CG13941 gene product from transcript CG13941-RA // 50F6-50F6 //	FBtr0087547		3.07381	1.6e-08	9.39396e-07	1.97239	7.26e-05	0.000602735	NA	NA
Immune induced molecule 10	CG18279	IM10	CG18279	FBgn0033835	Induced unknown proteins	-	3853	18150493	NM_165981 // IM10 // Immune induced molecule 10 // 50A5-50A5 // 36486 /// FBtr0087655 /	NM_165981		2.14989	0.0173258	0.0768038	1.1123	0.728991	0.824687	NA	NA
CG9989	CG9989	CG9989	CG9989	FBgn0039593	Induced unknown proteins	-	10633	18188807	FBtr0085307 // CG9989 // CG9989 gene product from transcript CG9989-RA // 98E1-98E1 //	FBtr0085307		4.19875	8.93e-05	0.00125868	2.08374	0.0281525	0.0713074	NA	NA
CG13641	CG13641	CG13641	CG13641	FBgn0039239	Induced unknown proteins	-	12428	18199408	FBtr0084729 // CG13641 // CG13641 gene product from transcript CG13641-RA // 96B1-96B1	FBtr0084729		1.49992	0.0872873	0.241516	2.55366	0.000289593	0.00180686	NA	NA
Cuticular protein 67Fb	CG18348	Cpr67Fb	CG18348	FBgn0036110	Induced unknown proteins	-	7008	18168806	FBtr0076193 // Cpr67Fb // Cuticular protein 67Fb // 67F1-67F1 // 39225 /// NM_140163 //	FBtr0076193		2.21682	7.22e-05	0.0010655	1.22249	0.257071	0.400182	NA	NA
CG10910	CG10910	CG10910	CG10910	FBgn0034289	Induced unknown proteins	-	4005	18151339	FBtr0089630 // CG10910 // CG10910 gene product from transcript CG10910-RB // 55B1-55B1	FBtr0089630		4.0632	2.23e-08	1.25079e-06	1.71988	0.00720929	0.0239741	NA	NA
