# Supplementary material for: Gut-brain axis neurodegeneration in a Drosophila model of Parkinson’s disease is linked to mitochondrial dysfunction
Source: Research Square preprint supplement (doi:10.21203/rs.3.rs-100637/v1), 2020-12-16
Supplement: Supplementary file 2 [file 3671996e7b219ef5b1b39e3b.xlsx]

## Sheet: Transcripts
Column #	Probeset ID	gene_assignment	Gene_Symbol	RefSeq	p_val_Whole_3days	Fold_Change_Pink1_W_3d vs_ Control_W_3d	p_val_Whole_30days	Fold_Change_Pink1_W_30d vs_ Control_W_30d	p_Adj_BH_day3	p_Adj_BH_day30
13935	18208020	FBtr0071054 // CG1999 // CG1999 gene product from transcript CG1999-RA // 7B2-7B2 // 31	CG1999	FBtr0071054	0.335722	-1.08259	0.000414882	1.37835	0.570976	0.00239961
6998	18168774	FBtr0076256 // CG18628 // CG18628 gene product from transcript CG18628-RA // 67E5-67E5	CG18628	FBtr0076256	0.0195476	1.20152	0.162559	1.11254	0.0842076	0.284078
5945	18162590	FBtr0088158 // CG30025 // CG30025 gene product from transcript CG30025-RA // 47F4-47F5	CG30025	FBtr0088158	0.174403	1.11118	0.75006	1.02468	0.382608	0.837952
6313	18164658	FBtr0304888 // CG43101 // CG43101 gene product from transcript CG43101-RA // 51D8-51D8	CG43101	FBtr0304888	0.476547	-1.07525	0.0225532	-1.27343	0.701687	0.0598558
12951	18202168	NR_003918 // snoRNA:Psi18S-1377b // ncRNA // 99E2-99E2 // 5740459 /// BT023903 // RpS7	snoRNA:Psi18S-1377b	NR_003918	6e-29	-66.2709	6.38e-33	-285.623	4.8966e-25	5.20672e-29
12952	18202169	---	NA	---	6e-29	-66.2709	6.38e-33	-285.623	4.8966e-25	5.20672e-29
9253	18180900	FBtr0078270 // Mst77F // Male-specific transcript 77F // 77E8-77F // 40304 /// NM_07946	Mst77F	FBtr0078270	0.309831	-1.08962	0.0434697	1.19126	0.544825	0.100826
6941	18168440	NM_139987 // S-Lap1 // Sperm-Leucylaminopeptidase 1 // 66D8-66D8 // 38986 /// FBtr00766	S-Lap1	NM_139987	0.131193	-1.14603	0.0408995	1.20631	0.318035	0.0960797
7736	18172483	FBtr0301683 // sinah // sina homologue // 73D3-73D3 // 39885 /// NM_140670 // sinah //	sinah	FBtr0301683	0.259374	-1.10091	3.97e-05	1.49244	0.489309	0.000370488
2825	18144591	FBtr0081183 // CG10650 // CG10650 gene product from transcript CG10650-RA // 37B8-37B8	CG10650	FBtr0081183	0.000529299	1.29459	0.209494	1.08936	0.00519809	0.343868
1119	18135237	FBtr0080464 // CG16826 // CG16826 gene product from transcript CG16826-RA // 34B6-34B6	CG16826	FBtr0080464	0.349019	1.11456	0.860693	1.02039	0.584096	0.912146
7595	18171775	FBtr0301030 // CG33258 // CG33258 gene product from transcript CG33258-RB // 72D1-72D1	CG33258	FBtr0301030	0.0957834	1.16287	0.252003	-1.10796	0.25761	0.394211
4924	18156296	FBtr0088759 // Mal-A1 // Maltase A1 // 44D1-44D1 // 35824 /// NM_057279 // Mal-A1 // Ma	Mal-A1	FBtr0088759	0.877604	-1.01302	0.924343	1.00801	0.94453	0.95241
8789	18178663	FBtr0299605 // CG13700 // CG13700 gene product from transcript CG13700-RD // 75C4-75C4	CG13700	FBtr0299605	0.658812	-1.03933	9.14e-05	1.4751	0.830695	0.000722786
14276	18209731	FBtr0074672 // Mur18B // Mucin related 18B // 18B1-18B1 // 32912 /// NM_133136 // Mur18	Mur18B	FBtr0074672	0.493625	1.07747	0.283146	-1.12485	0.715346	0.429748
14328	18210061	FBtr0077256 // CG14579 // CG14579 gene product from transcript CG14579-RA // 19F2-19F2	CG14579	FBtr0077256	0.151914	-1.17426	0.00125886	1.47404	0.349625	0.00584555
3731	18149769	FBtr0331953 // CG12923 // CG12923 gene product from transcript CG12923-RB // 46C2-46C2	CG12923	FBtr0331953	0.607804	1.04813	0.333555	-1.09315	0.797346	0.483936
4368	18153252	FBtr0331953 // CG12923 // CG12923 gene product from transcript CG12923-RB // 46C2-46C2	CG12923	FBtr0331953	0.607804	1.04813	0.333555	-1.09315	0.797346	0.483936
4373	18153300	FBtr0088123 // CG30031 // CG30031 gene product from transcript CG30031-RA // 47F4-47F4	CG30031	FBtr0088123	0.279401	1.10561	0.567507	1.05411	0.51091	0.701316
4979	18156710	FBtr0088123 // CG30031 // CG30031 gene product from transcript CG30031-RA // 47F4-47F4	CG30031	FBtr0088123	0.279401	1.10561	0.567507	1.05411	0.51091	0.701316
12546	18200006	FBtr0085347 // CG14521 // CG14521 gene product from transcript CG14521-RA // 98F2-98F4	CG14521	FBtr0085347	0.000344984	-1.15636	2.15e-08	-1.309	0.00374889	8.27649e-07
4054	18151603	FBtr0086518 // CG9975 // CG9975 gene product from transcript CG9975-RA // 56D1-56D1 //	CG9975	FBtr0086518	0.674578	1.04346	0.000154203	1.54082	0.838759	0.00110155
1041	18134862	FBtr0080101 // CG17097 // CG17097 gene product from transcript CG17097-RB // 32A2-32A2	CG17097	FBtr0080101	0.298409	-1.14113	0.933245	1.0106	0.531438	0.958557
6205	18163979	FBtr0087819 // CG17575 // CG17575 gene product from transcript CG17575-RA // 49D4-49D4	CG17575	FBtr0087819	0.902772	-1.01328	0.200527	-1.15037	0.956076	0.332927
959	18134388	FBtr0079684 // CG13091 // CG13091 gene product from transcript CG13091-RB // 29D4-29D4	CG13091	FBtr0079684	0.109152	1.23385	0.334148	1.13314	0.281238	0.484624
6475	18165512	FBtr0075836 // Acp70A // Accessory gland peptide 70A // 70A4-70A4 // 39494 /// NM_07933	Acp70A	FBtr0075836	0.00129702	-1.47902	0.0640706	-1.23673	0.0105744	0.137257
11504	18194098	NM_079774 // Mst57Dc // Male-specific RNA 57Dc // 96F3-96F3 // 43121 /// FBtr0084916 //	Mst57Dc	NM_079774	0.971801	-1.00409	0.514573	-1.07846	0.988329	0.655784
3693	18149560	FBtr0088714 // CG8746 // CG8746 gene product from transcript CG8746-RA // 44F1-44F1 //	CG8746	FBtr0088714	0.304862	-1.11027	0.00559652	1.3479	0.5391	0.0195393
4213	18152422	FBtr0072006 // CG9875 // CG9875 gene product from transcript CG9875-RB // 59D8-59D8 //	CG9875	FBtr0072006	0.57663	-1.06602	0.000672472	1.53447	0.775597	0.00353497
9356	18181609	FBtr0305487 // CG43147 // CG43147 gene product from transcript CG43147-RB // 70A4-70A4	CG43147	FBtr0305487	0.695654	-1.05076	0.63573	-1.06183	0.85167	0.754646
9929	18185060	FBtr0081790 // CG7910 // CG7910 gene product from transcript CG7910-RA // 84E10-84E10 /	CG7910	FBtr0081790	0.353799	-1.11546	0.046436	-1.27223	0.58906	0.106346
1374	18136721	FBtr0081028 // CG31740 // CG31740 gene product from transcript CG31740-RA // 36E3-36E3	CG31740	FBtr0081028	0.276268	-1.13604	0.000177567	1.63233	0.507837	0.00122859
634	18132631	FBtr0080670 // CG4691 // CG4691 gene product from transcript CG4691-RA // 35B5-35B5 //	CG4691	FBtr0080670	0.766519	-1.03606	0.00175443	1.4993	0.890325	0.0075957
7640	18171967	FBtr0072928 // CG16984 // CG16984 gene product from transcript CG16984-RA // 62E7-62E7	CG16984	FBtr0072928	0.665764	-1.03433	1.3e-05	1.49264	0.835186	0.00015038
3682	18149500	FBtr0088740 // CG8701 // CG8701 gene product from transcript CG8701-RA // 44C4-44C4 //	CG8701	FBtr0088740	0.616007	-1.03422	0.0131925	1.19084	0.802358	0.0391767
8903	18179282	FBtr0078415 // CG9389 // CG9389 gene product from transcript CG9389-RA // 78C3-78C3 //	CG9389	FBtr0078415	0.749955	-1.02912	2.7e-05	1.55142	0.882217	0.00027103
14459	18210765	FBtr0100081 // CG34026 // CG34026 gene product from transcript CG34026-RA // 8E7-8E7 //	CG34026	FBtr0100081	0.748763	-1.0377	0.878322	-1.01784	0.881513	0.92365
12067	18197349	FBtr0082940 // soti // scotti // 88B7-88B7 // 41748 /// FBtr0082940 // soti // scotti /	soti	FBtr0082940	0.168932	-1.17967	0.0593601	1.25813	0.374126	0.12927
9530	18182569	NM_079674 // Rh2 // Rhodopsin 2 // 91D4-91D4 // 42261 /// FBtr0083697 // Rh2 // Rhodops	Rh2	NM_079674	0.103604	-1.07936	7.39e-06	-1.27716	0.271781	9.57074e-05
6123	18163509	NM_165873 // SIP2 // Syntaxin Interacting Protein 2 // 48F6-48F6 // 36332 /// FBtr00896	SIP2	NM_165873	0.19921	-1.1704	0.258803	1.14794	0.416326	0.401997
8391	18176598	FBtr0077066 // CG10472 // CG10472 gene product from transcript CG10472-RA // 65A5-65A5	CG10472	FBtr0077066	0.00821147	1.26657	0.0573482	-1.17959	0.0441171	0.125727
7113	18169307	FBtr0075685 // CG13477 // CG13477 gene product from transcript CG13477-RA // 70F1-70F1	CG13477	FBtr0075685	0.984516	1.00216	0.00511025	1.39379	0.994016	0.0181364
7294	18170193	FBtr0078172 // Spn77Bc // Serpin 77Bc // 77B4-77B4 // 40236 /// FBtr0331816 // Spn77Bc	Spn77Bc	FBtr0078172	0.909545	1.01356	0.054583	-1.26485	0.959116	0.12085
7712	18172282	FBtr0077040 // Jon65Aiv // Jonah 65Aiv // 65A3-65A3 // 38682 /// NM_139755 // Jon65Aiv	Jon65Aiv	FBtr0077040	0.349602	1.13086	0.906089	-1.01552	0.584712	0.942286
5053	18157232	FBtr0087080 // Acp53Ea // Accessory gland-specific peptide 53Ea // 53D6-53D6 // 36874 /	Acp53Ea	FBtr0087080	0.613095	-1.04933	0.0103566	1.29341	0.800424	0.0322781
11889	18196314	FBtr0331695 // CG12950 // CG12950 gene product from transcript CG12950-RB // 85E6-85E6	CG12950	FBtr0331695	0.0063363	-1.1268	3.45e-08	-1.34543	0.0363647	1.21622e-06
3159	18146358	FBtr0303280 // CG42750 // CG42750 gene product from transcript CG42750-RB // 36F1-36F2	CG42750	FBtr0303280	0.79147	-1.01171	0.00851007	-1.13046	0.903873	0.0275161
9958	18185188	FBtr0081910 // CG8136 // CG8136 gene product from transcript CG8136-RB // 85A9-85A9 //	CG8136	FBtr0081910	0.0033741	-1.29478	0.0520724	1.17864	0.0222424	0.116364
10851	18190094	FBtr0084128 // CG31198 // CG31198 gene product from transcript CG31198-RA // 93F8-93F9	CG31198	FBtr0084128	0.758984	1.03863	0.753904	-1.03949	0.886894	0.840693
6167	18163710	FBtr0112413 // CG34220 // CG34220 gene product from transcript CG34220-RA // 46D7-46D7	CG34220	FBtr0112413	0.598389	1.03519	0.231921	1.08247	0.790994	0.370937
4301	18152899	FBtr0300763 // CG12851 // CG12851 gene product from transcript CG12851-RB // 60E8-60E9	CG12851	FBtr0300763	0.264588	1.03776	0.0436607	-1.07101	0.494736	0.101197
14601	18211812	NM_001169190 // norpA // no receptor potential A // 4B6-4C1|1-6.5 cM // 31376 /// FBtr0	norpA	NM_001169190	0.0775037	-1.05587	1.77e-10	-1.31891	0.221679	1.59613e-08
15811	18218327	FBtr0310286 // CG42492 // CG42492 gene product from transcript CG42492-RE // 5A9-5A9 //	CG42492	FBtr0310286	0.00202219	-1.13517	9.78e-09	-1.33812	0.0148543	4.2342e-07
15157	18214966	FBtr0332295 // Rph // Rabphilin // 9E2-9E4 // 32002 /// FBtr0301558 // Rph // Rabphilin	Rph	FBtr0332295	0.182523	-1.06584	2.12e-05	-1.26366	0.393858	0.000222382
13530	18205439	FBtr0303286 // eag // ether a go-go // 13A2-13A5|1-50.0 cM // 32428 /// FBtr0111009 //	eag	FBtr0303286	0.00433673	-1.14752	1.35e-06	-1.30575	0.0271516	2.4898e-05
5982	18162772	FBtr0072193 // CG30172 // CG30172 gene product from transcript CG30172-RA // 60B5-60B5	CG30172	FBtr0072193	0.184152	1.06268	0.347217	-1.04364	0.396012	0.49831
1793	18138554	FBtr0308949 // CG42784 // CG42784 gene product from transcript CG42784-RF // 34C3-34C3	CG42784	FBtr0308949	0.000488996	-1.15525	1.39e-06	-1.2469	0.0048667	2.54631e-05
8501	18177203	FBtr0076485 // CG3982 // CG3982 gene product from transcript CG3982-RA // 67B5-67B5 //	CG3982	FBtr0076485	0.118171	1.11252	2.09e-05	1.39425	0.296828	0.000219659
631	18132619	FBtr0080707 // dao // down and out // 35C5-35C5 // 34891 /// NM_135898 // dao // down a	dao	FBtr0080707	0.605836	1.0211	4.48e-05	-1.20923	0.795891	0.000409421
1655	18137854	NM_001259104 // GABA-B-R1 // metabotropic GABA-B receptor subtype 1 // 35B8-35B8 // 348	GABA-B-R1	NM_001259104	0.162127	-1.06545	3.24e-05	-1.23983	0.364094	0.000314781
10420	18187611	NM_001170219 // oa2 // octopamine receptor 2 // 94B1-94B2 // 42652 /// FBtr0301484 // o	oa2	NM_001170219	0.364772	1.04257	0.000779762	-1.18391	0.598975	0.0039935
12194	18198061	FBtr0083597 // CG7131 // CG7131 gene product from transcript CG7131-RA // 91A1-91A1 //	CG7131	FBtr0083597	0.221258	-1.11648	0.00219126	1.34291	0.443942	0.0091007
15147	18214928	FBtr0071471 // CG15306 // CG15306 gene product from transcript CG15306-RA // 9B7-9B7 //	CG15306	FBtr0071471	0.144298	-1.21717	0.0224315	1.37067	0.338785	0.0595788
4473	18153810	FBtr0088854 // CG30378 // CG30378 gene product from transcript CG30378-RA // 43F6-43F6	CG30378	FBtr0088854	0.621089	1.06324	0.00157667	1.5303	0.805368	0.0070003
7387	18170685	NM_079220 // yip7 // yippee interacting protein 7 // 65A3-65A3 // 38680 /// FBtr0077038	yip7	NM_079220	0.49181	1.10471	0.644616	-1.06895	0.71354	0.761649
15424	18216360	FBtr0074690 // CG7992 // CG7992 gene product from transcript CG7992-RA // 18B4-18B5 //	CG7992	FBtr0074690	0.960398	-1.00502	0.147888	-1.16011	0.982859	0.263605
7475	18171144	NM_168411 // S-Lap4 // Sperm-Leucylaminopeptidase 4 // 67E4-67E4 // 326188 /// FBtr0076	S-Lap4	NM_168411	0.211315	-1.12126	0.00612683	1.30187	0.431729	0.0209812
11814	18195873	FBtr0333829 // CG17816 // CG17816 gene product from transcript CG17816-RE // 84E3-84E4	CG17816	FBtr0333829	0.00232345	-1.12317	2.13e-06	-1.2254	0.016666	3.55479e-05
5005	18156915	FBtr0088162 // thetaTry // thetaTrypsin // 47F3-47F4 // 36218 /// NM_078969 // thetaTry	thetaTry	FBtr0088162	0.45465	-1.09251	0.000171739	-1.64694	0.683034	0.00119926
6433	18165287	NM_079203 // nAcRbeta-64B // nicotinic Acetylcholine Receptor beta 64B // 64B6-64B6 //	nAcRbeta-64B	NM_079203	0.0275249	1.07638	0.000906266	-1.12387	0.107944	0.00449607
1391	18136805	FBtr0080868 // CG31816 // CG31816 gene product from transcript CG31816-RA // 36A4-36A4	CG31816	FBtr0080868	0.921804	-1.01172	7.48e-05	1.7114	0.964833	0.00061692
15912	18218997	FBtr0111023 // para // paralytic // 14D1-16A2|1-55 cM // 32619 /// FBtr0074298 // para	para	FBtr0111023	0.000266895	-1.15973	0.000171951	-1.16629	0.00308517	0.00119926
13009	18202498	FBtr0078825 // rtp // retinophilin // 82F6-82F6 // 40627 /// NM_141263 // rtp // retino	rtp	FBtr0078825	0.0407811	-1.06482	2.53e-11	-1.34597	0.143013	3.38481e-09
11038	18191065	FBtr0304918 // CG34384 // CG34384 gene product from transcript CG34384-RC // 84E1-84E3	CG34384	FBtr0304918	0.40167	-1.03615	0.267367	-1.0483	0.634539	0.412395
12954	18202180	FBtr0110806 // CG34113 // CG34113 gene product from transcript CG34113-RP // 83C6-83C8	CG34113	FBtr0110806	0.153502	-1.06874	1.1e-07	-1.3656	0.351697	3.18902e-06
10710	18189247	FBtr0085699 // CG1340 // CG1340 gene product from transcript CG1340-RC // 100A3-100A3 /	CG1340	FBtr0085699	0.170945	-1.16663	0.00106148	1.48748	0.376865	0.00510323
15783	18218100	FBtr0307540 // mmd // mind-meld // 14A1-14A3 // 32561 /// NM_001258775 // mmd // mind-m	mmd	FBtr0307540	0.921561	1.00445	0.00651243	-1.13949	0.96473	0.0220257
15882	18218852	FBtr0308309 // cngl // CNG channel-like // 13C1-13C1 // 32468 /// NM_001258762 // cngl	cngl	FBtr0308309	0.00370671	-1.16264	4.26e-07	-1.35795	0.0240613	9.91893e-06
13019	18202568	FBtr0081604 // CG1288 // CG1288 gene product from transcript CG1288-RA // 84D2-84D2 //	CG1288	FBtr0081604	0.663397	-1.06848	0.0684339	1.32918	0.833868	0.144145
8389	18176593	FBtr0077068 // CG10477 // CG10477 gene product from transcript CG10477-RA // 65A3-65A3	CG10477	FBtr0077068	0.641197	1.06576	0.468098	1.10451	0.819034	0.616103
4948	18156473	FBtr0088161 // alphaTry // alphaTrypsin // 47F4-47F4 // 48316 /// NM_057423 // alphaTry	alphaTry	FBtr0088161	0.846155	1.02814	0.621039	-1.0734	0.928504	0.744189
6522	18165885	NM_079922 // CdsA // CDP diglyceride synthetase // 66B7-66B7 // 43950 /// FBtr0076688 /	CdsA	NM_079922	0.305285	-1.02697	0.116887	-1.04204	0.539621	0.22038
15193	18215164	NR_002106 // CR32661 // ncRNA // 10F6-10F6 // 3772605	CR32661	NR_002106	0.0106888	-1.48287	0.901659	-1.01823	0.0536903	0.939595
11419	18193575	NM_079529 // Mst84Dd // Male-specific RNA 84Dd // 84D5-84D5 // 40886 /// FBtr0081588 //	Mst84Dd	NM_079529	0.686786	-1.0471	9.66e-05	1.65826	0.846144	0.00075694
14019	18208414	FBtr0332933 // CG43901 // CG43901 gene product from transcript CG43901-RA // 9F10-9F11	CG43901	FBtr0332933	0.00841423	-1.1218	2.95e-08	-1.3493	0.044999	1.06291e-06
3378	18147533	NM_057515 // inaC // inactivation no afterpotential C // 53E1-53E1|2-82 cM // 36897 ///	inaC	NM_057515	0.417827	1.04075	0.0406537	-1.1095	0.648954	0.0955848
11503	18194096	NM_079775 // Mst57Db // Male-specific RNA 57Db // 96F3-96F3 // 43122 /// FBtr0084915 //	Mst57Db	NM_079775	0.618423	1.0757	0.115342	1.26487	0.804039	0.218122
10744	18189422	NM_001170315 // RhoGAP100F // CG1976 gene product from transcript CG1976-RD // 100D2-10	RhoGAP100F	NM_001170315	0.137534	-1.06951	2.22e-05	-1.24593	0.328045	0.000230795
389	18131029	NM_001273260 // ninaC // neither inactivation nor afterpotential C // 27F3-27F3 // 3401	ninaC	NM_001273260	0.0148585	-1.09194	3.23e-12	-1.45444	0.0688392	5.64324e-10
12911	18201976	FBtr0301555 // Rim // CG33547 gene product from transcript CG33547-RU // 90C9-90C10 //	Rim	FBtr0301555	0.809254	-1.01021	0.0174841	-1.11039	0.912776	0.0489663
11252	18192472	FBtr0308953 // CG11000 // CG11000 gene product from transcript CG11000-RC // 83C4-83C4	CG11000	FBtr0308953	0.00215711	-1.16589	5.97e-06	-1.28378	0.0156343	8.10668e-05
12231	18198290	FBtr0083741 // CG5217 // CG5217 gene product from transcript CG5217-RA // 91F12-91F12 /	CG5217	FBtr0083741	0.479904	1.10159	2.63e-06	2.17202	0.704089	4.26285e-05
11791	18195761	FBtr0081703 // CG1138 // CG1138 gene product from transcript CG1138-RA // 83F4-83F4 //	CG1138	FBtr0081703	0.0317915	-1.30843	0.0221147	1.33381	0.119756	0.058922
7479	18171165	FBtr0076198 // CG32081 // CG32081 gene product from transcript CG32081-RA // 68A1-68A2	CG32081	FBtr0076198	0.571674	1.07371	8.4e-05	1.75525	0.772486	0.000674396
5304	18159055	FBtr0088678 // CG8248 // CG8248 gene product from transcript CG8248-RA // 44F7-44F7 //	CG8248	FBtr0088678	0.00267135	-1.16802	8.95e-08	-1.39056	0.0185856	2.6804e-06
6344	18164807	FBtr0306912 // CG43327 // CG43327 gene product from transcript CG43327-RA // 53E10-53E1	CG43327	FBtr0306912	0.389867	1.08637	3.59e-09	2.16282	0.62466	1.83686e-07
6345	18164809	FBtr0306912 // CG43327 // CG43327 gene product from transcript CG43327-RA // 53E10-53E1	CG43327	FBtr0306912	0.389867	1.08637	3.59e-09	2.16282	0.62466	1.83686e-07
8681	18178112	FBtr0332815 // CG7804 // CG7804 gene product from transcript CG7804-RA // 71D2-71D2 //	CG7804	FBtr0332815	0.765109	-1.03214	0.000473749	1.5067	0.889758	0.00266901
12084	18197444	FBtr0089376 // dpr9 // CG33485 gene product from transcript CG33485-RA // 88E1-88E1 //	dpr9	FBtr0089376	0.239394	-1.05321	4.06e-07	-1.31812	0.465965	9.49389e-06
2306	18141624	FBtr0077418 // CG15630 // CG15630 gene product from transcript CG15630-RA // 25A4-25A6	CG15630	FBtr0077418	1.61e-05	-1.26495	2.7e-10	-1.52302	0.000314335	2.22573e-08
11301	18192669	NM_001260257 // CG42613 // CG42613 gene product from transcript CG42613-RE // 91E1-91E1	CG42613	NM_001260257	0.00018575	-1.11935	7.36e-10	-1.26124	0.00228763	5.00541e-08
1839	18138756	NR_073786 // CR43803 // ncRNA // 35D7-35D7 // 14462780	CR43803	NR_073786	0.985415	1.00278	0.118294	1.27381	0.994186	0.222416
11330	18192944	FBtr0330100 // chp // chaoptic // 100B5-100B6 // 43690 /// FBtr0330101 // chp // chaopt	chp	FBtr0330100	0.239406	1.03584	2.75e-06	-1.18271	0.465965	4.41786e-05
860	18133834	FBtr0079143 // CG9029 // CG9029 gene product from transcript CG9029-RA // 26A1-26A1 //	CG9029	FBtr0079143	0.979798	1.00303	0.19918	-1.16819	0.992076	0.331398
10219	18186545	FBtr0083184 // CG4546 // CG4546 gene product from transcript CG4546-RA // 89A5-89A5 //	CG4546	FBtr0083184	0.0720086	-1.22109	0.00620667	1.37013	0.210493	0.0212024
3954	18151066	FBtr0087107 // CG5089 // CG5089 gene product from transcript CG5089-RA // 53C9-53C9 //	CG5089	FBtr0087107	0.673003	-1.05247	0.000146632	1.68063	0.838413	0.00105993
4917	18156244	NM_001259541 // inaD // inactivation no afterpotential D // 59B3-59B3|2-101 cM // 37629	inaD	NM_001259541	3.3e-05	-1.23568	1.34e-12	-1.64298	0.000568771	2.60375e-10
3994	18151279	FBtr0086859 // CG10934 // CG10934 gene product from transcript CG10934-RA // 54E1-54E2	CG10934	FBtr0086859	0.0205675	1.37787	3.55e-07	2.32907	0.0872553	8.62249e-06
6023	18162917	FBtr0273325 // mtt // mangetout // 44D1-44D2 // 35832 /// FBtr0330608 // mtt // mangeto	mtt	FBtr0273325	0.00327338	-1.15952	1.2e-05	-1.27328	0.0217364	0.000140909
3263	18146758	NM_001273283 // Slob // Slowpoke binding protein // 28B4-28C1 // 34038 /// NM_164756 //	Slob	NM_001273283	0.976631	-1.00132	1.76e-06	-1.29988	0.990419	3.05603e-05
6024	18162939	FBtr0088769 // boly // borrelly // 44C4-44C4 // 35809 /// NM_136529 // boly // borrelly	boly	FBtr0088769	0.581588	-1.06823	0.000871119	1.54752	0.778818	0.00435613
11177	18192031	FBtr0303603 // CG42796 // CG42796 gene product from transcript CG42796-RE // 85A5-85A5	CG42796	FBtr0303603	0.0130792	-1.13989	0.000167448	-1.23709	0.06278	0.00117755
6871	18168029	FBtr0077047 // CG6602 // CG6602 gene product from transcript CG6602-RA // 65A5-65A5 //	CG6602	FBtr0077047	0.000307116	1.59205	0.597678	-1.06294	0.00342635	0.725247
8569	18177590	FBtr0076119 // Muc68D // Mucin 68D // 68D4-68D4 // 39326 /// NM_140247 // Muc68D // Muc	Muc68D	FBtr0076119	0.769653	-1.04444	0.443154	-1.12112	0.892058	0.593125
10105	18185894	FBtr0082631 // CG5538 // CG5538 gene product from transcript CG5538-RA // 87B11-87B11 /	CG5538	FBtr0082631	0.790241	-1.02967	0.000895966	1.49227	0.90318	0.00445852
2866	18144830	FBtr0308127 // fred // friend of echinoid // 24C9-24D2 // 33613 /// FBtr0308125 // fred	fred	FBtr0308127	0.767489	-1.01496	0.00400646	-1.16742	0.8908	0.0148757
1662	18137894	FBtr0301255 // CG42556 // CG42556 gene product from transcript CG42556-RA // 36B3-36B3	CG42556	FBtr0301255	0.153025	-1.12431	1.02e-05	1.5229	0.350987	0.000124242
15018	18214337	FBtr0070755 // TrxT // Thioredoxin T // 4F4-4F4 // 31443 /// NM_131984 // TrxT // Thior	TrxT	FBtr0070755	0.395769	-1.12639	0.23	1.18439	0.629588	0.368641
464	18131543	FBtr0079937 // Pen // Pendulin // 31A1-31A2 // 34338 /// NM_057693 // Pen // Pendulin /	Pen	FBtr0079937	0.98534	1.00257	0.0319451	1.36445	0.994186	0.0790251
2356	18141912	FBtr0079151 // CG9016 // CG9016 gene product from transcript CG9016-RB // 26A1-26A1 //	CG9016	FBtr0079151	0.376288	1.08249	0.000168015	1.45893	0.611426	0.0011795
13253	18203973	NM_079899 // toy // twin of eyeless // 102F4-102F5|4-0 cM // 43833 /// FBtr0089185 // t	toy	NM_079899	0.149482	-1.06357	8.84e-06	-1.24782	0.345979	0.000110819
14360	18210233	FBtr0070069 // CG12470 // CG12470 gene product from transcript CG12470-RA // 1A1-1A1 //	CG12470	FBtr0070069	0.620159	1.05793	0.000488823	1.54974	0.804916	0.00273707
9434	18181999	FBtr0330419 // dysc // dyschronic // 70C5-70C5 // 39533 /// NM_001274882 // dysc // dys	dysc	FBtr0330419	2.58e-05	-1.24994	2.61e-07	-1.34442	0.000464286	6.5843e-06
7800	18173000	NM_001274304 // Glut1 // Glucose transporter 1 // 61D4-61E // 38109 /// FBtr0333503 //	Glut1	NM_001274304	0.393015	1.03217	0.781059	-1.0103	0.627548	0.859495
3702	18149606	FBtr0088660 // CG13747 // CG13747 gene product from transcript CG13747-RA // 45A1-45A1	CG13747	FBtr0088660	0.956558	1.00726	0.000350987	1.69704	0.98139	0.00210618
3175	18146453	FBtr0310549 // CG42850 // CG42850 gene product from transcript CG42850-RA // 25E1-25E1	CG42850	FBtr0310549	0.933434	1.0111	0.000216595	1.73105	0.970674	0.00143593
12120	18197674	FBtr0083237 // CG10407 // CG10407 gene product from transcript CG10407-RB // 89B1-89B1	CG10407	FBtr0083237	0.812984	-1.02715	0.95992	-1.0057	0.913424	0.97467
15468	18216600	FBtr0077294 // hydra // CG1338 gene product from transcript CG1338-RA // 19E1-19E1 // 3	hydra	FBtr0077294	0.876152	1.02127	0.00595657	1.48521	0.943806	0.0205282
12353	18198950	FBtr0110801 // CG4467 // CG4467 gene product from transcript CG4467-RB // 94E7-94E8 //	CG4467	FBtr0110801	0.125755	-1.07836	9.09e-06	-1.28928	0.309495	0.000113257
954	18134371	FBtr0079660 // CG13385 // CG13385 gene product from transcript CG13385-RA // 29C1-29C1	CG13385	FBtr0079660	0.612097	-1.06429	0.00012506	1.70404	0.7998	0.000931218
6451	18165374	NM_001031956 // gdl // gonadal // 71D3-71D3 // 3772583 /// NM_001274948 // gdl // gonad	gdl	NM_001031956	0.711006	-1.02273	5.69e-06	1.38882	0.858687	7.85056e-05
6659	18166695	NM_001031956 // gdl // gonadal // 71D3-71D3 // 3772583 /// NM_001274948 // gdl // gonad	gdl	NM_001031956	0.711006	-1.02273	5.69e-06	1.38882	0.858687	7.85056e-05
14071	18208665	FBtr0073644 // CG2574 // CG2574 gene product from transcript CG2574-RA // 11A9-11A9 //	CG2574	FBtr0073644	0.0617518	1.25947	7.85e-08	2.29481	0.189493	2.42666e-06
8940	18179477	NM_001104192 // CG14459 // CG14459 gene product from transcript CG14459-RC // 79F1-79F3	CG14459	NM_001104192	0.0633959	-1.08063	8.62e-06	-1.23886	0.192822	0.000108561
13005	18202441	NM_001170309 // stops // slow termination of phototransduction // 100B4-100B5|3-101 cM	stops	NM_001170309	0.136598	-1.0699	6.45e-08	-1.3657	0.326579	2.04421e-06
6504	18165683	NM_078996 // Gbeta76C // G protein beta-subunit 76C // 76C1-76C1 // 40148 /// FBtr00749	Gbeta76C	NM_078996	0.00528058	-1.1531	3.31e-09	-1.47254	0.031479	1.75409e-07
5589	18160650	FBtr0087081 // Acp53C14b // CG15616 gene product from transcript CG15616-RA // 53D6-53D	Acp53C14b	FBtr0087081	0.315397	-1.15506	0.731463	1.05013	0.550518	0.826567
5826	18161888	FBtr0072121 // CG3906 // CG3906 gene product from transcript CG3906-RA // 59E2-59E2 //	CG3906	FBtr0072121	0.11182	1.21348	0.0746977	-1.24366	0.28608	0.15486
3843	18150444	FBtr0087792 // CG13321 // CG13321 gene product from transcript CG13321-RA // 49E4-49E4	CG13321	FBtr0087792	0.338318	-1.14224	0.0641366	-1.3002	0.573836	0.137308
7683	18172129	FBtr0112708 // sif // still life // 64E1-64E5 // 43892 /// NM_168126 // sif // still li	sif	FBtr0112708	0.00195513	-1.15575	9.79e-05	-1.21067	0.0144462	0.000765289
3082	18145890	FBtr0080662 // CG4218 // CG4218 gene product from transcript CG4218-RA // 35B2-35B2 //	CG4218	FBtr0080662	0.949261	-1.00993	0.0502268	1.36877	0.97895	0.113107
4046	18151556	FBtr0086574 // CG15109 // CG15109 gene product from transcript CG15109-RC // 56B2-56B2	CG15109	FBtr0086574	0.0103064	1.40109	5.77e-08	2.39982	0.052438	1.86491e-06
6011	18162883	FBtr0071544 // Cht12 // CG30293 gene product from transcript CG30293-RA // 57B16-57B16	Cht12	FBtr0071544	0.000102381	-1.79681	0.483608	-1.09781	0.00140899	0.629111
1680	18137998	FBtr0303712 // CG42659 // CG42659 gene product from transcript CG42659-RB // 36E3-36E3	CG42659	FBtr0303712	0.0319243	-1.31417	0.187103	1.17827	0.120104	0.315648
12982	18202306	FBtr0305292 // CG34353 // CG34353 gene product from transcript CG34353-RB // 98B3-98B5	CG34353	FBtr0305292	0.519946	-1.0307	0.0152696	-1.1267	0.736233	0.0440181
1595	18137485	FBtr0112367 // CG34176 // CG34176 gene product from transcript CG34176-RA // 24D3-24D3	CG34176	FBtr0112367	0.0387262	1.31084	0.243095	1.16091	0.1378	0.383831
2712	18143949	FBtr0081281 // CG10186 // CG10186 gene product from transcript CG10186-RH // 37E5-37E5	CG10186	FBtr0081281	0.219225	-1.05502	0.000419396	-1.1838	0.441425	0.0024163
13854	18207556	FBtr0070742 // CG15465 // CG15465 gene product from transcript CG15465-RA // 4F2-4F2 //	CG15465	FBtr0070742	0.299947	-1.04758	0.00152117	-1.16571	0.533421	0.00679303
6490	18165611	NM_176366 // rdgC // retinal degeneration C // 77B1-77B1 // 40224 /// FBtr0074833 // rd	rdgC	NM_176366	0.000365531	-1.21563	1.1e-06	-1.34281	0.00392647	2.09013e-05
13018	18202558	FBtr0305964 // CG2016 // CG2016 gene product from transcript CG2016-RB // 82E4-82E4 //	CG2016	FBtr0305964	0.127305	-1.08962	1.38e-08	-1.51778	0.311859	5.68797e-07
2561	18143206	FBtr0080251 // CG14926 // CG14926 gene product from transcript CG14926-RA // 32E4-32E4	CG14926	FBtr0080251	0.304507	-1.17427	0.139173	1.26307	0.538906	0.251699
11997	18196984	FBtr0082603 // CG10096 // CG10096 gene product from transcript CG10096-RA // 87B9-87B9	CG10096	FBtr0082603	0.648623	-1.0397	0.000568887	-1.38387	0.824764	0.00308075
1352	18136574	FBtr0089787 // wry // weary // 22B3-22B4 // 33361 /// FBtr0089786 // wry // weary // 22	wry	FBtr0089787	2.58e-05	-1.25058	2.57e-07	-1.34562	0.000464286	6.50349e-06
348	18130788	FBtr0331242 // Lar // Leukocyte-antigen-related-like // 37F2-38A2 // 35259 /// NM_00127	Lar	FBtr0331242	0.379395	-1.0325	0.00121219	-1.13628	0.614517	0.00567892
9097	18180226	FBtr0076788 // CG32371 // CG32371 gene product from transcript CG32371-RA // 66A12-66A1	CG32371	FBtr0076788	0.652055	-1.04188	0.0196287	1.24827	0.826504	0.053782
535	18132039	FBtr0085897 // Ac3 // CG1506 gene product from transcript CG1506-RA // 39E3-39E3 // 354	Ac3	FBtr0085897	0.0323736	-1.12581	0.00694427	-1.16528	0.121277	0.0232406
2609	18143446	FBtr0080485 // kek4 // kekkon4 // 34A9-34A10 // 34718 /// NM_135771 // kek4 // kekkon4	kek4	FBtr0080485	1.97e-07	-1.49794	5.96e-09	-1.61916	7.97874e-06	2.82788e-07
10976	18190751	FBtr0300075 // CG31178 // CG31178 gene product from transcript CG31178-RB // 93F14-93F1	CG31178	FBtr0300075	0.700098	-1.05921	0.00671594	1.53698	0.8541	0.0225969
10876	18190225	FBtr0084339 // Tpl94D // Transition protein-like 94D // 94D5-94D5 // 318658 /// FBtr031	Tpl94D	FBtr0084339	0.0137508	1.44433	4.5e-05	1.94914	0.0649987	0.000409872
7760	18172598	FBtr0301098 // CG42540 // CG42540 gene product from transcript CG42540-RB // 64B11-64B1	CG42540	FBtr0301098	0.19079	1.06194	0.0540177	-1.09415	0.405637	0.119891
12059	18197320	FBtr0082907 // CG14355 // CG14355 gene product from transcript CG14355-RA // 88A9-88A10	CG14355	FBtr0082907	0.453004	-1.09263	0.00156852	1.49788	0.681531	0.0069756
15516	18216848	FBtr0070185 // CG3690 // CG3690 gene product from transcript CG3690-RA // 1D3-1D3 // 31	CG3690	FBtr0070185	0.210713	1.16265	0.141586	1.19466	0.430931	0.254764
11104	18191517	FBtr0300319 // Sfp87B // Seminal fluid protein 87B // 87B4-87B4 // 8674076 /// NM_00117	Sfp87B	FBtr0300319	0.459394	1.13566	0.958091	1.00904	0.685791	0.973964
5285	18158965	FBtr0088765 // CG2127 // CG2127 gene product from transcript CG2127-RA // 44C4-44C4 //	CG2127	FBtr0088765	0.926332	1.0149	0.420539	1.1383	0.967654	0.572003
10000	18185415	FBtr0082073 // CG8301 // CG8301 gene product from transcript CG8301-RA // 85D26-85D27 /	CG8301	FBtr0082073	0.0171461	-1.11487	1.08e-05	-1.25386	0.0762558	0.000129521
4815	18155645	NM_080379 // Pal2 // Peptidyl-alpha-hydroxyglycine-alpha-amidating lyase 2 // 59F6-59F6	Pal2	NM_080379	0.858724	-1.0065	0.190455	-1.04951	0.93503	0.31998
6696	18166925	FBtr0072507 // ttm2 // tiny tim 2 // 61B3-61B3 // 38049 /// NM_138179 // ttm2 // tiny t	ttm2	FBtr0072507	0.782056	-1.03325	0.00076226	1.54899	0.898154	0.00391615
3401	18147689	FBtr0088122 // betaTry // betaTrypsin // 47F4-47F4 // 47901 /// NM_080165 // betaTry //	betaTry	FBtr0088122	0.852385	1.03626	0.288023	-1.22777	0.93192	0.435127
6269	18164468	FBtr0329938 // CG42732 // CG42732 gene product from transcript CG42732-RN // 47A1-47A7	CG42732	FBtr0329938	0.162236	1.06872	0.865478	-1.00796	0.364289	0.915392
4785	18155492	FBtr0304023 // CG42855 // CG42855 gene product from transcript CG42855-RB // 55E6-55E6	CG42855	FBtr0304023	0.667646	1.07126	0.113855	1.29479	0.835492	0.216111
740	18133197	FBtr0077754 // CG4270 // CG4270 gene product from transcript CG4270-RA // 22D6-22D6 //	CG4270	FBtr0077754	0.0644609	-1.20674	0.000156257	1.52468	0.195076	0.00111372
14638	18212012	FBtr0330322 // CG43740 // CG43740 gene product from transcript CG43740-RA // 9B7-9B7 //	CG43740	FBtr0330322	0.0105499	-1.1323	2.3e-10	-1.52137	0.0532729	1.96548e-08
12809	18201422	FBtr0085814 // CG31204 // CG31204 gene product from transcript CG31204-RA // 100C3-100C	CG31204	FBtr0085814	0.361793	-1.11522	0.000171838	1.65367	0.596062	0.00119926
4727	18154971	FBtr0087092 // loopin-1 // CG4750 gene product from transcript CG4750-RA // 53C9-53C10	loopin-1	FBtr0087092	0.456132	-1.10534	0.0121437	1.42409	0.683905	0.0367259
964	18134407	FBtr0273420 // Tsp29Fb // Tetraspanin 29Fb // 29F5-29F5 // 34212 /// NM_001144337 // Ts	Tsp29Fb	FBtr0273420	0.690943	1.01368	0.000705109	-1.1358	0.848512	0.00367693
2877	18144876	FBtr0081010 // CG31803 // CG31803 gene product from transcript CG31803-RA // 36C7-36C7	CG31803	FBtr0081010	0.618677	1.0552	6.28e-06	1.78623	0.804241	8.42945e-05
3632	18149205	FBtr0086179 // Tsp42Ec // Tetraspanin 42Ec // 42E5-42E5 // 35612 /// NM_078905 // Tsp42	Tsp42Ec	FBtr0086179	0.172737	1.15208	0.683425	-1.04264	0.379821	0.791237
14190	18209255	FBtr0074206 // dpr18 // CG14948 gene product from transcript CG14948-RA // 14A6-14A7 //	dpr18	FBtr0074206	0.000127509	-1.2309	4.56e-07	-1.35187	0.00168226	1.04829e-05
8682	18178117	FBtr0075616 // ran-like // CG7815 gene product from transcript CG7815-RA // 71D3-71D3 /	ran-like	FBtr0075616	0.784059	1.03814	0.000296689	1.73619	0.899137	0.00184408
9462	18182175	FBtr0305959 // CG17374 // CG17374 gene product from transcript CG17374-RC // --- // 335	CG17374	FBtr0305959	0.675078	1.04825	0.121354	-1.19406	0.838759	0.226837
11405	18193477	NM_057420 // trp // transient receptor potential // 99C6-99C7 // 43542 /// NM_001276161	trp	NM_057420	0.000516818	-1.21239	8.54e-10	-1.53899	0.00509698	5.66626e-08
12349	18198922	FBtr0302023 // CG13830 // CG13830 gene product from transcript CG13830-RD // 94D12-94D1	CG13830	FBtr0302023	0.00263487	-1.10743	9.3e-07	-1.20956	0.0184181	1.81572e-05
4704	18154785	FBtr0305904 // CG12907 // CG12907 gene product from transcript CG12907-RB // 47A2-47A2	CG12907	FBtr0305904	0.171044	-1.23518	0.00721043	1.54277	0.377013	0.0239741
9543	18182627	FBtr0301582 // slo // slowpoke // 96A14-96A17|3-86 cM // 42940 /// NM_001170241 // slo	slo	FBtr0301582	1.08e-08	-1.29001	4.67e-12	-1.43	6.80608e-07	7.62237e-10
6913	18168294	FBtr0076747 // eIF4E-5 // CG8277 gene product from transcript CG8277-RA // 66A18-66A18	eIF4E-5	FBtr0076747	0.66982	-1.06892	0.00332706	1.63626	0.836597	0.0127266
6245	18164286	FBtr0301431 // MCPH1 // Microcephalin // 48C5-48C5 // 36272 /// FBtr0301430 // MCPH1 //	MCPH1	FBtr0301431	0.0265753	-1.12088	0.00223637	1.17741	0.105129	0.00924336
14258	18209643	FBtr0074631 // CG6891 // CG6891 gene product from transcript CG6891-RA // 17D4-17D5 //	CG6891	FBtr0074631	0.000740244	1.29852	0.0155511	1.19559	0.00676498	0.0446482
5635	18160901	FBtr0086807 // CG10912 // CG10912 gene product from transcript CG10912-RA // 55B2-55B2	CG10912	FBtr0086807	0.413689	1.13796	0.718824	1.05831	0.645344	0.817378
11943	18196633	NM_141804 // scpr-B // SCP-containing protein B // 86D8-86D8 // 41357 /// FBtr0082362 /	scpr-B	NM_141804	0.062874	-1.31842	0.188227	1.21261	0.191783	0.317053
2144	18140815	FBtr0303908 // Nckx30C // CG18660 gene product from transcript CG18660-RF // 30C6-30C7	Nckx30C	FBtr0303908	0.0148392	-1.11182	3.8e-05	-1.21805	0.0687888	0.000357691
6719	18167066	FBtr0072655 // CG9130 // CG9130 gene product from transcript CG9130-RB // 61F4-61F4 //	CG9130	FBtr0072655	0.857135	1.02545	0.000605589	1.69621	0.934099	0.00324503
635	18132633	NM_205985 // nAcRalpha-34E // nicotinic Acetylcholine Receptor alpha 34E // 34F2-34F4 /	nAcRalpha-34E	NM_205985	0.00148942	-1.17499	0.00318719	-1.15942	0.0117276	0.0122895
11793	18195767	FBtr0081700 // CG15177 // CG15177 gene product from transcript CG15177-RB // 84A1-84A1	CG15177	FBtr0081700	0.884516	1.01653	8.7e-06	1.81306	0.946971	0.000109485
11739	18195522	FBtr0078874 // CG14658 // CG14658 gene product from transcript CG14658-RA // 82D7-82D7	CG14658	FBtr0078874	0.674043	-1.05572	0.0115511	1.40894	0.838759	0.0352274
9059	18180029	FBtr0074845 // CG32225 // CG32225 gene product from transcript CG32225-RA // 77B2-77B2	CG32225	FBtr0074845	0.760579	1.01471	0.0019034	-1.17494	0.887834	0.00810733
9035	18179917	FBtr0075867 // CG32119 // CG32119 gene product from transcript CG32119-RA // 70A3-70A3	CG32119	FBtr0075867	0.909005	-1.01366	9.13e-05	1.69722	0.958944	0.000722696
4319	18153012	NM_206186 // dpr // defective proboscis extension response // 57B1-57B2 // 2768858 ///	dpr	NM_206186	0.148618	1.07534	0.0651986	-1.09828	0.344909	0.139126
14497	18211000	NM_001258717 // fne // found in neurons // 11D4-11D4 // 32245 /// FBtr0306738 // fne //	fne	NM_001258717	0.00265954	-1.14553	1.76e-06	-1.27675	0.0185327	3.05603e-05
2648	18143632	FBtr0080955 // CG6304 // CG6304 gene product from transcript CG6304-RA // 36B6-36B6 //	CG6304	FBtr0080955	0.480252	-1.09905	0.000809016	1.63322	0.704283	0.00410468
8014	18174438	NM_001259706 // Con // Connectin // 64C2-64C5 // 38590 /// FBtr0309972 // Con // Connec	Con	NM_001259706	0.00604886	-1.16788	6.41e-05	-1.27528	0.0350105	0.000546054
5288	18158990	NM_136539 // Mal-A7 // Maltase A7 // 44D1-44D1 // 35829 /// FBtr0088757 // Mal-A7 // Ma	Mal-A7	NM_136539	0.230864	-1.20559	0.0459371	-1.37454	0.455202	0.105396
12517	18199861	FBtr0085170 // CG3330 // CG3330 gene product from transcript CG3330-RA // 97F3-97F3 //	CG3330	FBtr0085170	0.426869	-1.11367	0.0201743	1.38745	0.657298	0.0548991
8331	18176307	FBtr0301645 // Teh4 // tipE homolog 4 // 64A9-64A9 // 38501 /// NM_139609 // Teh4 // ti	Teh4	FBtr0301645	6.27e-05	-1.27178	7.56e-06	-1.32155	0.000947583	9.73909e-05
11998	18196999	FBtr0100524 // CG10097 // CG10097 gene product from transcript CG10097-RA // 87B9-87B9	CG10097	FBtr0100524	0.720372	-1.03441	0.000373022	-1.45339	0.864298	0.00221318
4662	18154500	FBtr0300553 // dpr12 // CG34385 gene product from transcript CG34385-RE // 42A1-42A1 //	dpr12	FBtr0300553	0.0659997	-1.09905	6.09e-05	-1.25826	0.198206	0.00052482
11502	18194094	NM_080167 // Mst57Da // Male-specific RNA 57Da // 96F3-96F3 // 47954 /// FBtr0084914 //	Mst57Da	NM_080167	0.597719	-1.06596	0.0335811	1.30529	0.790597	0.0822668
12471	18199609	FBtr0084921 // CG17195 // CG17195 gene product from transcript CG17195-RA // 96F2-96F2	CG17195	FBtr0084921	0.777751	1.03274	1.19e-05	1.8022	0.895605	0.000140037
5519	18160276	FBtr0309056 // CG12858 // CG12858 gene product from transcript CG12858-RB // 51C1-51C1	CG12858	FBtr0309056	0.594303	-1.02356	3.08e-05	-1.23477	0.7881	0.000302842
10922	18190443	FBtr0081679 // CG31482 // CG31482 gene product from transcript CG31482-RA // 83F4-83F4	CG31482	FBtr0081679	0.881722	-1.01816	0.00178776	1.50658	0.945926	0.00770729
7877	18173493	FBtr0309278 // nwk // nervous wreck // 67A1-67A1 // 39052 /// NM_001259762 // nwk // ne	nwk	FBtr0309278	0.516558	-1.03251	0.000339485	-1.21688	0.733983	0.00204921
6180	18163828	FBtr0329849 // Epac // CG34392 gene product from transcript CG34392-RE // 42D1-42D1 //	Epac	FBtr0329849	0.272142	1.04825	0.00600409	-1.13237	0.503674	0.0206618
6868	18168019	FBtr0077041 // Jon65Aiii // Jonah 65Aiii // 65A3-65A3 // 38683 /// NM_139756 // Jon65Ai	Jon65Aiii	FBtr0077041	0.176795	1.24364	0.796749	1.04183	0.385937	0.870567
6211	18164033	FBtr0299700 // prom // prominin // 60C8-60C8 // 246493 /// NM_001144282 // prom // prom	prom	FBtr0299700	0.00388125	-1.19938	7.63e-07	-1.43224	0.0248333	1.57244e-05
8011	18174416	FBtr0112853 // Shal // Shaker cognate l // 76B7-76B8 // 40129 /// NM_001104176 // Shal	Shal	FBtr0112853	0.0326597	-1.11206	0.000165325	-1.22559	0.12204	0.00116513
3930	18150905	FBtr0087209 // SP2353 // CG8403 gene product from transcript CG8403-RA // 52D15-52E1 //	SP2353	FBtr0087209	0.927218	-1.00428	0.0519103	-1.09824	0.968022	0.116097
13508	18205249	NM_001258522 // Appl // beta amyloid protein precursor-like // 1B9-1B10|1-0.0 cM // 310	Appl	NM_001258522	0.000620456	-1.17284	0.000104063	-1.20462	0.00589813	0.000802322
9053	18179997	FBtr0089796 // CG32206 // CG32206 gene product from transcript CG32206-RE // 76A6-76B2	CG32206	FBtr0089796	0.569727	1.02971	0.00163603	-1.19222	0.771004	0.00718853
14511	18211155	FBtr0299860 // Ten-a // Tenascin accessory // 11A7-11A8 // 32183 /// FBtr0308222 // Ten	Ten-a	FBtr0299860	0.901135	1.00662	0.000700152	-1.21921	0.955439	0.00365341
5517	18160272	FBtr0087481 // CG12861 // CG12861 gene product from transcript CG12861-RA // 51B9-51B9	CG12861	FBtr0087481	0.0614909	-1.38365	0.289019	-1.19787	0.188977	0.436147
3439	18147976	NM_001274059 // igl // igloo // 51E3-51E5 // 36681 /// FBtr0332267 // igl // igloo // 5	igl	NM_001274059	0.953839	1.00276	0.0228918	-1.11969	0.980442	0.0605379
8750	18178479	FBtr0332785 // CG6497 // CG6497 gene product from transcript CG6497-RB // 74A2-74A2 //	CG6497	FBtr0332785	0.00282577	-1.41515	0.00454939	1.3875	0.0194362	0.0164865
2637	18143560	FBtr0080872 // CG5968 // CG5968 gene product from transcript CG5968-RB // 36A4-36A4 //	CG5968	FBtr0080872	0.874852	-1.02283	0.00886923	1.48732	0.942927	0.0284184
12635	18200451	FBtr0085741 // CG11317 // CG11317 gene product from transcript CG11317-RA // 100B2-100B	CG11317	FBtr0085741	0.0749742	-1.10489	8.74e-08	-1.45603	0.216935	2.64175e-06
7434	18170932	FBtr0073204 // CG18869 // CG18869 gene product from transcript CG18869-RA // 64A5-64A5	CG18869	FBtr0073204	0.506011	1.05972	2.13e-05	1.53928	0.725178	0.000223287
2836	18144661	FBtr0079207 // CG31639 // CG31639 gene product from transcript CG31639-RA // 26B8-26B9	CG31639	FBtr0079207	0.00249084	-1.61404	0.0937537	-1.28591	0.0175542	0.184969
1184	18135547	FBtr0081152 // CG17344 // CG17344 gene product from transcript CG17344-RA // 37C1-37C1	CG17344	FBtr0081152	0.820031	1.04017	0.124669	1.31113	0.916373	0.231364
1824	18138709	FBtr0081152 // CG17344 // CG17344 gene product from transcript CG17344-RA // 37C1-37C1	CG17344	FBtr0081152	0.820031	1.04017	0.124669	1.31113	0.916373	0.231364
1339	18136477	FBtr0110959 // CG31619 // CG31619 gene product from transcript CG31619-RC // 39F1-39F3	CG31619	FBtr0110959	0.0626843	1.08895	0.0848019	-1.08175	0.191419	0.170881
2014	18139977	FBtr0081015 // CadN // Cadherin-N // 36D2-36D3|2-53.1 cM // 35070 /// NM_165227 // CadN	CadN	FBtr0081015	0.000114743	-1.24051	2.26e-05	-1.27555	0.00154397	0.000233911
14177	18209174	FBtr0074103 // CG8565 // CG8565 gene product from transcript CG8565-RA // 13F9-13F10 //	CG8565	FBtr0074103	0.212095	-1.16389	0.000451948	1.59574	0.432295	0.00256759
3939	18150994	FBtr0087132 // CG3687 // CG3687 gene product from transcript CG3687-RA // 53A1-53A1 //	CG3687	FBtr0087132	0.47646	1.10626	0.00124752	1.64479	0.701624	0.00580445
1406	18136851	FBtr0080099 // CG31872 // CG31872 gene product from transcript CG31872-RA // 32A2-32A2	CG31872	FBtr0080099	0.013515	1.52689	9.83e-06	2.34426	0.0641628	0.000120817
10865	18190178	FBtr0084127 // CG31233 // CG31233 gene product from transcript CG31233-RA // 93F8-93F8	CG31233	FBtr0084127	0.892491	-1.02007	0.0690099	-1.31617	0.951485	0.145227
9051	18179984	FBtr0113429 // CG32204 // CG32204 gene product from transcript CG32204-RB // 75E6-75E7	CG32204	FBtr0113429	5.68e-05	-1.29455	4.26e-07	-1.42342	0.000876266	9.91893e-06
637	18132656	FBtr0080702 // CG15270 // CG15270 gene product from transcript CG15270-RC // 35C1-35C2	CG15270	FBtr0080702	1.34e-10	-1.65497	8.41e-12	-1.76101	1.49805e-08	1.30731e-09
7569	18171636	FBtr0078425 // CG32445 // CG32445 gene product from transcript CG32445-RA // 78E2-78E2	CG32445	FBtr0078425	0.605149	1.05685	1.12e-05	1.7392	0.795589	0.000133338
15034	18214427	FBtr0070887 // CG4666 // CG4666 gene product from transcript CG4666-RA // 5D3-5D3 // 31	CG4666	FBtr0070887	0.00167483	1.29835	0.323846	1.07902	0.0128401	0.473597
11500	18194083	NM_001260163 // DopR // Dopamine receptor // 88A10-88A12 // 41726 /// FBtr0308191 // Do	DopR	NM_001260163	0.221428	1.07976	0.000973215	-1.25113	0.444217	0.00474174
868	18133879	FBtr0079187 // CG13995 // CG13995 gene product from transcript CG13995-RA // 26B3-26B4	CG13995	FBtr0079187	0.000686577	-1.22214	0.000231738	-1.24786	0.00638077	0.00151297
1089	18135072	FBtr0080354 // CG17010 // CG17010 gene product from transcript CG17010-RA // 33E1-33E1	CG17010	FBtr0080354	0.00765629	1.27774	2.05e-10	2.21167	0.041747	1.77979e-08
1171	18135492	FBtr0081110 // CG17321 // CG17321 gene product from transcript CG17321-RA // 37B1-37B1	CG17321	FBtr0081110	0.000108699	1.24271	8.05e-05	1.24918	0.00148343	0.000652718
8568	18177579	FBtr0332132 // CG6024 // CG6024 gene product from transcript CG6024-RF // 68D3-68D4 //	CG6024	FBtr0332132	0.258917	1.05759	0.524647	-1.03182	0.489018	0.664903
1724	18138273	FBtr0304630 // CG43050 // CG43050 gene product from transcript CG43050-RA // 34A5-34A5	CG43050	FBtr0304630	4.14e-05	-1.85499	0.000365508	-1.6788	0.000681868	0.00217493
12957	18202217	FBtr0110870 // CG34129 // CG34129 gene product from transcript CG34129-RA // 97A4-97A4	CG34129	FBtr0110870	0.34202	-1.10182	0.479135	-1.07463	0.577117	0.625585
6937	18168411	FBtr0076621 // CG6765 // CG6765 gene product from transcript CG6765-RB // 66D5-66D5 //	CG6765	FBtr0076621	0.134423	-1.08415	0.000776693	-1.21639	0.323607	0.00397903
10888	18190293	FBtr0084126 // CG31343 // CG31343 gene product from transcript CG31343-RA // 93F8-93F8	CG31343	FBtr0084126	0.048589	-1.30787	0.0095996	-1.43465	0.16031	0.0302889
10087	18185824	FBtr0082538 // ssp5 // short spindle 5 // 87A5-87A5 // 41465 /// NM_141892 // ssp5 // s	ssp5	FBtr0082538	0.793141	-1.03412	0.000576584	1.62654	0.904089	0.00312036
961	18134397	FBtr0079732 // CG12438 // CG12438 gene product from transcript CG12438-RA // 29E6-29E6	CG12438	FBtr0079732	0.287869	-1.14268	0.0117527	1.39129	0.519539	0.035762
5238	18158566	NM_165514 // Dscam // Down syndrome cell adhesion molecule // 43A4-43B1 // 35652 /// NM	Dscam	NM_165514	4.22e-05	-1.19346	1.73e-06	-1.24387	0.00069225	3.02001e-05
12075	18197394	FBtr0082976 // CG7886 // CG7886 gene product from transcript CG7886-RA // 88C9-88C10 //	CG7886	FBtr0082976	0.69057	1.0528	0.00310917	1.50781	0.848245	0.0120455
7503	18171311	FBtr0301018 // CG32181 // CG32181 gene product from transcript CG32181-RB // 75A1-75A1	CG32181	FBtr0301018	0.841445	-1.02621	0.000256047	1.69777	0.926994	0.00164083
12624	18200408	FBtr0085672 // CG2267 // CG2267 gene product from transcript CG2267-RB // 100A1-100A1 /	CG2267	FBtr0085672	0.56646	-1.08507	0.0187474	1.41837	0.768742	0.0518145
7219	18169812	FBtr0075181 // CG7542 // CG7542 gene product from transcript CG7542-RA // 74D4-74D4 //	CG7542	FBtr0075181	0.0171789	1.35547	0.000120109	-1.70066	0.0763392	0.000900798
15918	18219075	FBtr0304609 // Ca-alpha1T // Ca[2+]-channel protein alpha[[1]] subunit T // 5D5-5D7 //	Ca-alpha1T	FBtr0304609	0.627726	1.02159	0.0179235	-1.11521	0.809556	0.0499228
11671	18195155	FBtr0303200 // CG2217 // CG2217 gene product from transcript CG2217-RA // 99F3-99F4 //	CG2217	FBtr0303200	0.0974235	1.08917	3.28e-05	-1.2744	0.260864	0.0003181
13089	18203096	FBtr0303200 // CG2217 // CG2217 gene product from transcript CG2217-RA // 99F3-99F4 //	CG2217	FBtr0303200	0.0974235	1.08917	3.28e-05	-1.2744	0.260864	0.0003181
12218	18198204	FBtr0083725 // CG14292 // CG14292 gene product from transcript CG14292-RA // 91D4-91D4	CG14292	FBtr0083725	0.455487	1.11862	0.968347	-1.00595	0.683503	0.98036
4697	18154725	FBtr0112775 // CG12484 // CG12484 gene product from transcript CG12484-RB // 57A3-57A3	CG12484	FBtr0112775	0.513577	1.0334	0.00209131	-1.18168	0.731084	0.00875465
8357	18176423	FBtr0073363 // CG12493 // CG12493 gene product from transcript CG12493-RB // 64B16-64B1	CG12493	FBtr0073363	0.988201	-1.00199	0.00831633	1.45768	0.995029	0.0269377
14643	18212048	NR_073638 // CR43835 // ncRNA // 7B3-7B3 // 14462386 /// NR_047778 // CR43279 // ncRNA	CR43835	NR_073638	0.374768	-1.18212	0.205081	1.27186	0.610119	0.338902
10775	18189580	NM_001275319 // cpx // complexin // 82A1-82A3 // 64877 /// NM_001104204 // cpx // compl	cpx	NM_001275319	0.694687	1.01598	0.127387	-1.06468	0.850805	0.235558
12407	18199286	FBtr0084627 // CG5762 // CG5762 gene product from transcript CG5762-RA // 95F15-95F15 /	CG5762	FBtr0084627	0.756211	-1.04262	0.00614099	1.47975	0.885495	0.0210133
6029	18162951	FBtr0088798 // CG30371 // CG30371 gene product from transcript CG30371-RA // 44C3-44C3	CG30371	FBtr0088798	0.000174469	-1.7023	3.14e-06	-2.02899	0.00216719	4.85792e-05
7983	18174234	NM_168321 // Rdl // Resistant to dieldrin // 67A1-67A1|3-24.7 cM // 39054 /// NM_001274	Rdl	NM_168321	0.446493	-1.03079	0.0281053	-1.09484	0.675847	0.071221
2495	18142800	NM_205952 // nAcRalpha-30D // nicotinic Acetylcholine Receptor alpha 30D // 30D1-30E1 /	nAcRalpha-30D	NM_205952	0.00164878	-1.19601	0.00415109	-1.17431	0.012706	0.0153022
13304	18204434	FBtr0308805 // unc-13 // CG2999 gene product from transcript CG2999-RD // 102E5-102F1 /	unc-13	FBtr0308805	0.306721	-1.04049	0.000107068	-1.18465	0.541222	0.000822383
13617	18206187	NM_206746 // Lcch3 // Ligand-gated chloride channel homolog 3 // 14A1-14A1 // 32554 ///	Lcch3	NM_206746	0.641073	-1.02866	0.000843871	-1.24837	0.81894	0.00424851
2214	18141173	FBtr0077934 // CG18131 // CG18131 gene product from transcript CG18131-RG // 22A2-22A2	CG18131	FBtr0077934	0.707751	-1.04315	5.77e-05	1.68155	0.857121	0.000503087
8179	18175506	FBtr0075116 // Met75Ca // CG32197 gene product from transcript CG32197-RA // 75C7-75C7	Met75Ca	FBtr0075116	0.473833	1.12279	0.458902	1.12727	0.699205	0.607428
8180	18175508	FBtr0075116 // Met75Ca // CG32197 gene product from transcript CG32197-RA // 75C7-75C7	Met75Ca	FBtr0075116	0.473833	1.12279	0.458902	1.12727	0.699205	0.607428
5815	18161831	FBtr0072046 // CG3124 // CG3124 gene product from transcript CG3124-RA // 59D4-59D4 //	CG3124	FBtr0072046	0.848384	1.03553	0.126037	1.32939	0.92985	0.233452
9486	18182319	NM_057656 // Cha // Choline acetyltransferase // 91C1-91C5|3-64.6 cM // 42249 /// FBtr0	Cha	NM_057656	0.0289347	-1.1376	1.96e-05	-1.32734	0.111886	0.000209366
13374	18204919	FBtr0113686 // klhl10 // CG12423 gene product from transcript CG12423-RB // --- // 3354	klhl10	FBtr0113686	0.0569235	-1.25346	0.000433593	1.56813	0.179226	0.00247971
7281	18170127	FBtr0074899 // schuy // schumacher-levy // 76D8-76D8 // 40184 /// NM_140909 // schuy //	schuy	FBtr0074899	0.376154	-1.13289	0.00406602	1.53908	0.611391	0.0150523
7403	18170765	FBtr0073218 // CG18675 // CG18675 gene product from transcript CG18675-RA // 64A9-64A10	CG18675	FBtr0073218	0.990958	-1.00131	0.000167568	1.63539	0.996084	0.00117788
14814	18213057	FBtr0329901 // tty // tweety // 19F4-19F5 // 33109 /// NM_167744 // tty // tweety // 19	tty	FBtr0329901	0.059073	-1.09931	6.28e-10	-1.52939	0.183796	4.39923e-08
15431	18216404	FBtr0074779 // CG12231 // CG12231 gene product from transcript CG12231-RA // 18C8-18C8	CG12231	FBtr0074779	0.0154599	-1.27078	0.000660309	1.42471	0.0707221	0.00348225
9687	18183694	FBtr0084337 // klg // klingon // 94D3-94D4|3-78.1 cM // 42707 /// NM_079730 // klg // k	klg	FBtr0084337	0.00177654	-1.19036	3.79e-08	-1.44646	0.0134058	1.3218e-06
5689	18161216	FBtr0086324 // CG16894 // CG16894 gene product from transcript CG16894-RA // 56F9-56F9	CG16894	FBtr0086324	0.256187	-1.16791	0.00376925	1.52242	0.486163	0.014111
10441	18187729	FBtr0084348 // CG6726 // CG6726 gene product from transcript CG6726-RB // 94D13-94D13 /	CG6726	FBtr0084348	0.347631	-1.06197	6.58e-07	-1.4801	0.58249	1.40391e-05
629	18132612	FBtr0300613 // CG12448 // CG12448 gene product from transcript CG12448-RC // 35D7-35D7	CG12448	FBtr0300613	0.818974	-1.02792	0.000697347	1.5672	0.915944	0.00364111
5193	18158318	FBtr0301868 // Menl-2 // Malic enzyme like-2 // 53C4-53C4 // 3772692 /// FBtr0301869 //	Menl-2	FBtr0301868	0.656885	-1.05115	2.81e-05	1.72573	0.829635	0.00028069
10551	18188365	FBtr0084879 // CG5107 // CG5107 gene product from transcript CG5107-RA // 96E2-96E2 //	CG5107	FBtr0084879	0.651714	1.06597	0.504854	-1.09919	0.826319	0.648122
3523	18148537	FBtr0304900 // stan // starry night // 47B4-47B7|2-62 cM // 36125 /// FBtr0304899 // st	stan	FBtr0304900	0.335246	1.05617	0.191535	-1.0774	0.570547	0.321563
15742	18217875	FBtr0112526 // CG34324 // CG34324 gene product from transcript CG34324-RA // 11F8-11F8	CG34324	FBtr0112526	0.889085	1.02409	0.599411	-1.094	0.949839	0.726864
10501	18188086	FBtr0084698 // CG6980 // CG6980 gene product from transcript CG6980-RA // 96A23-96A23 /	CG6980	FBtr0084698	0.356926	-1.123	0.00780703	1.42314	0.591143	0.0255415
2107	18140581	FBtr0331670 // Cdk5alpha // Cdk5 activator-like protein // 31D1-31D3 // 34385 /// NM_00	Cdk5alpha	FBtr0331670	0.306654	1.05584	0.0850843	-1.09745	0.541222	0.171312
7845	18173310	FBtr0305900 // CG43168 // CG43168 gene product from transcript CG43168-RA // 65A11-65A1	CG43168	FBtr0305900	0.997459	-1.00042	0.00147581	1.57798	0.998948	0.00662856
11092	18191434	FBtr0303651 // CG42342 // CG42342 gene product from transcript CG42342-RH // 89B20-89B2	CG42342	FBtr0303651	1.86e-06	-1.34835	2.79e-06	-1.3386	5.17188e-05	4.45581e-05
6925	18168345	NM_139937 // eIF4E-3 // eukaryotic translation initiation factor 4E-3 // 66C1-66C2 // 3	eIF4E-3	NM_139937	0.431459	-1.09212	0.00617951	1.38382	0.661619	0.0211229
13450	18205122	FBtr0301119 // CG41087 // CG41087 gene product from transcript CG41087-RB // --- // 335	CG41087	FBtr0301119	0.184479	-1.0906	5.33e-09	-1.66418	0.396506	2.57385e-07
12518	18199863	FBtr0085213 // CG5402 // CG5402 gene product from transcript CG5402-RA // 98A3-98A3 //	CG5402	FBtr0085213	0.865863	-1.0256	0.121808	-1.26624	0.938687	0.227529
13157	18203406	FBtr0306199 // mun // munin // 92E8-92E12 // 3346162 /// FBtr0306201 // mun // munin //	mun	FBtr0306199	0.000643308	-1.22376	3.16e-06	-1.35204	0.00607236	4.8704e-05
9784	18184260	FBtr0081578 // Syt4 // Synaptotagmin 4 // 84D3-84D3 // 40876 /// NM_058116 // Syt4 // S	Syt4	FBtr0081578	2.18e-05	-1.24039	0.000172546	-1.20212	0.00040434	0.00120252
3163	18146382	FBtr0306117 // dpr2 // CG33507 gene product from transcript CG33507-RE // 32B4-32C1 //	dpr2	FBtr0306117	0.481828	1.04227	4.12e-06	-1.38296	0.705256	6.00953e-05
12763	18201080	FBtr0085243 // CG31055 // CG31055 gene product from transcript CG31055-RB // 98B1-98B1	CG31055	FBtr0085243	0.813024	1.02931	0.000157476	1.6834	0.913424	0.00111997
6940	18168430	FBtr0300194 // CG6282 // CG6282 gene product from transcript CG6282-RC // 66D8-66D8 //	CG6282	FBtr0300194	0.352905	-1.05787	0.000109908	-1.30225	0.588548	0.000839456
13581	18205897	FBtr0071102 // sn // singed // 7D1-7D2|1-21.0 cM // 31717 /// NM_167143 // sn // singed	sn	FBtr0071102	0.673011	1.01891	0.117973	-1.07328	0.838413	0.22194
10247	18186676	FBtr0083329 // CG17562 // CG17562 gene product from transcript CG17562-RA // 89D5-89D5	CG17562	FBtr0083329	0.000299108	1.8114	0.279081	1.17438	0.00335997	0.42516
5309	18159092	FBtr0088671 // CG8216 // CG8216 gene product from transcript CG8216-RA // 44F12-44F12 /	CG8216	FBtr0088671	0.410104	-1.04624	0.428005	-1.04443	0.642515	0.578878
12900	18201884	FBtr0081704 // dpr11 // CG33202 gene product from transcript CG33202-RC // 83F1-83F4 //	dpr11	FBtr0081704	0.0250867	-1.14196	0.000200088	-1.26834	0.10068	0.00135231
14517	18211236	FBtr0310343 // CG42450 // CG42450 gene product from transcript CG42450-RB // 17E1-17E1	CG42450	FBtr0310343	0.0390887	-1.11305	8.57e-06	-1.30278	0.138727	0.000108099
15870	18218720	NR_047771 // CR43264 // ncRNA // 5C2-5C2 // 12798118	CR43264	NR_047771	0.403576	-1.0977	0.0118786	1.34211	0.636995	0.0360376
14500	18211047	FBtr0290088 // rg // rugose // 4E2-4F3|1-11.0 cM // 44531 /// NM_001144685 // rg // rug	rg	FBtr0290088	0.25149	-1.04678	0.0850896	-1.07208	0.481103	0.171312
10576	18188480	FBtr0300399 // CG6154 // CG6154 gene product from transcript CG6154-RD // 97A7-97A7 //	CG6154	FBtr0300399	0.000815458	-1.20288	8.78e-08	-1.41284	0.00733767	2.64893e-06
13695	18206664	FBtr0070080 // CG17778 // CG17778 gene product from transcript CG17778-RA // 1B5-1B5 //	CG17778	FBtr0070080	0.0578531	-1.11429	0.214573	-1.07209	0.181243	0.350366
589	18132365	FBtr0080752 // kek3 // kekkon-3 // 35D3-35D3 // 34912 /// NM_078851 // kek3 // kekkon-3	kek3	FBtr0080752	0.999348	1.00005	0.113593	-1.10295	0.999654	0.215664
9481	18182287	FBtr0084949 // boss // bride of sevenless // 96F8-96F8|3-90.5 cM // 43146 /// NM_080709	boss	FBtr0084949	8.48e-08	-1.55058	7.33e-10	-1.7352	3.87705e-06	5.00541e-08
8770	18178565	NM_140749 // Adgf-B // Adenosine deaminase-related growth factor B // 75A1-75A1 // 3997	Adgf-B	NM_140749	0.946692	-1.00787	3.98e-05	1.74456	0.977598	0.000370997
14219	18209442	FBtr0074382 // CG4955 // CG4955 gene product from transcript CG4955-RA // 15E1-15E1 //	CG4955	FBtr0074382	0.0666919	-1.29013	0.0213481	1.38401	0.199623	0.0574552
3656	18149325	FBtr0088909 // Corin // CG2105 gene product from transcript CG2105-RC // 43D3-43D7 // 3	Corin	FBtr0088909	0.116319	-1.08691	0.00581846	-1.16509	0.293576	0.0201718
2813	18144513	NM_001014457 // Obp22a // Odorant-binding protein 22a // 22B8-22B8 // 246672 /// NM_164	Obp22a	NM_001014457	0.552769	-1.07775	0.884495	-1.01844	0.760437	0.927751
11150	18191847	FBtr0302394 // CG42650 // CG42650 gene product from transcript CG42650-RA // 84D5-84D5	CG42650	FBtr0302394	0.0607362	-1.27181	0.12189	1.21711	0.187753	0.227625
5879	18162183	FBtr0072336 // CG13594 // CG13594 gene product from transcript CG13594-RA // 60D9-60D10	CG13594	FBtr0072336	0.114607	-1.08985	6.82e-05	-1.27576	0.29083	0.000573498
1156	18135419	FBtr0081050 // CG5790 // CG5790 gene product from transcript CG5790-RA // 36F2-36F2 //	CG5790	FBtr0081050	0.359897	-1.1597	0.0828808	1.33072	0.594198	0.168006
15163	18215003	FBtr0299600 // CG1545 // CG1545 gene product from transcript CG1545-RB // 10A3-10A3 //	CG1545	FBtr0299600	0.168917	-1.06605	8.16e-05	-1.22854	0.374126	0.000659018
10840	18189976	FBtr0084497 // CG31140 // CG31140 gene product from transcript CG31140-RB // 95D1-95D4	CG31140	FBtr0084497	0.656822	-1.01994	0.0730231	-1.08509	0.829635	0.151929
7052	18169001	FBtr0310535 // CG14125 // CG14125 gene product from transcript CG14125-RB // 68E4-68E4	CG14125	FBtr0310535	0.531534	-1.12485	0.326993	-1.20343	0.745022	0.476765
9290	18181147	NM_001275050 // Rbp6 // RNA-binding protein 6 // 73E5-74A1 // 39919 /// FBtr0333861 //	Rbp6	NM_001275050	1.49e-06	-1.2215	2.82e-08	-1.28136	4.31968e-05	1.02285e-06
15877	18218767	FBtr0307323 // cac // cacophony // 10F7-11A1|1-36.7 cM // 32158 /// NM_001258707 // cac	cac	FBtr0307323	0.197318	1.06325	0.002238	-1.16779	0.413928	0.00924776
9113	18180309	FBtr0078268 // CG32432 // CG32432 gene product from transcript CG32432-RB // 77F1-77F3	CG32432	FBtr0078268	7.63e-06	-1.32207	0.00468688	-1.17201	0.000170598	0.016891
12333	18198842	FBtr0084330 // CG4907 // CG4907 gene product from transcript CG4907-RA // 94C2-94C2 //	CG4907	FBtr0084330	0.0742769	1.23091	6.44e-08	2.20985	0.215452	2.04421e-06
10207	18186494	FBtr0083164 // CG5399 // CG5399 gene product from transcript CG5399-RB // 89A2-89A2 //	CG5399	FBtr0083164	0.00547155	1.52551	0.0246229	1.39661	0.0323459	0.0642621
15928	18219166	FBtr0113768 // CG2893 // CG2893 gene product from transcript CG2893-RE // --- // 335499	CG2893	FBtr0113768	0.00379082	-1.16922	0.000146436	-1.24118	0.0243886	0.00105945
10330	18187075	FBtr0083780 // CG16727 // CG16727 gene product from transcript CG16727-RA // 92A10-92A1	CG16727	FBtr0083780	0.00065897	-1.73458	2.34e-06	-2.31594	0.00618855	3.85793e-05
8884	18179191	FBtr0113182 // cmpy // crimpy // 77E3-77E3 // 40288 /// NM_001104181 // cmpy // crimpy	cmpy	FBtr0113182	0.115559	1.09814	0.184802	-1.08158	0.292291	0.313093
4328	18153043	FBtr0087857 // CG17580 // CG17580 gene product from transcript CG17580-RA // 49D3-49D3	CG17580	FBtr0087857	0.468491	1.0961	8.22e-06	1.9484	0.693705	0.000104086
9266	18181023	FBtr0309792 // CG42355 // CG42355 gene product from transcript CG42355-RC // 62C2-62C2	CG42355	FBtr0309792	0.158292	-1.23365	0.0634447	1.32259	0.3589	0.13624
8279	18176046	FBtr0333629 // CG43955 // CG43955 gene product from transcript CG43955-RB // 62E9-62F1	CG43955	FBtr0333629	0.00180951	1.21617	0.119892	1.09606	0.01358	0.225084
3132	18146244	FBtr0333233 // Sfp26Ad // Seminal fluid protein 26Ad // 26A3-26A3 // 8673981 /// FBtr03	Sfp26Ad	FBtr0333233	1.54e-07	2.43565	4.02e-09	2.90876	6.5458e-06	2.03141e-07
14306	18209939	FBtr0070002 // CG9570 // CG9570 gene product from transcript CG9570-RA // 19A6-19A6 //	CG9570	FBtr0070002	0.152494	-1.21301	0.0159406	1.39888	0.350416	0.045622
7375	18170618	FBtr0078546 // CG11226 // CG11226 gene product from transcript CG11226-RA // 80A4-80A4	CG11226	FBtr0078546	0.762768	1.02917	1.44e-05	1.62472	0.888834	0.000162994
11088	18191391	FBtr0305057 // CG42322 // CG42322 gene product from transcript CG42322-RJ // 92F12-92F1	CG42322	FBtr0305057	0.629554	-1.02641	0.00918644	-1.16032	0.810668	0.029234
15090	18214655	FBtr0071109 // CG2258 // CG2258 gene product from transcript CG2258-RA // 7D6-7D6 // 31	CG2258	FBtr0071109	0.423984	-1.02869	0.0357451	-1.07965	0.654176	0.0863959
11028	18190952	FBtr0112504 // CG34308 // CG34308 gene product from transcript CG34308-RA // 87D12-87D1	CG34308	FBtr0112504	0.689724	1.05027	0.000130013	1.70179	0.84778	0.000961519
7567	18171627	FBtr0078345 // CG32440 // CG32440 gene product from transcript CG32440-RA // 78C8-78C8	CG32440	FBtr0078345	0.643965	-1.07662	0.252861	1.20238	0.82122	0.395098
14404	18210444	FBtr0073913 // dpr8 // CG32600 gene product from transcript CG32600-RA // 12E8-12E10 //	dpr8	FBtr0073913	0.499562	1.03749	0.057391	-1.11217	0.719923	0.125804
9518	18182491	NM_080159 // Acp95EF // Accessory gland-specific peptide 95EF // 95F3-95F3 // 47852 ///	Acp95EF	NM_080159	0.733247	-1.07024	0.586138	-1.11472	0.872244	0.715874
15775	18218032	FBtr0074680 // gfA // giant fibre A // 18C2-18C3|1-62 cM // 32928 /// FBtr0301835 // gf	gfA	FBtr0074680	3.23e-07	-1.40714	5.7e-07	-1.39224	1.18206e-05	1.25048e-05
5518	18160274	FBtr0087480 // CG12860 // CG12860 gene product from transcript CG12860-RA // 51B9-51B9	CG12860	FBtr0087480	0.938971	1.01338	0.0585404	1.40245	0.973745	0.127928
7358	18170552	FBtr0301492 // olf413 // CG12673 gene product from transcript CG12673-RC // 79C2-79D2 /	olf413	FBtr0301492	0.0225518	-1.12741	0.000199126	-1.23448	0.0933632	0.00134804
15533	18216947	NM_130645 // PsGEF // Protostome-specific GEF // 3A2-3A2 // 31224 /// FBtr0333530 // Ps	PsGEF	NM_130645	0.000585244	-1.25	8.38e-07	-1.42965	0.00561903	1.69071e-05
13311	18204523	NM_080103 // onecut // CG1922 gene product from transcript CG1922-RB // 102D1-102D1 //	onecut	NM_080103	0.00318861	-1.19569	2.53e-07	-1.44283	0.0213297	6.44222e-06
12895	18201861	FBtr0082900 // CG33109 // CG33109 gene product from transcript CG33109-RA // 88A12-88A1	CG33109	FBtr0082900	8.42e-07	2.37091	0.000101417	1.87251	2.68946e-05	0.000786753
12754	18201036	NM_170467 // Ppi1 // Protein phosphatase 1c interacting protein 1 // 99D7-99D8 // 43581	Ppi1	NM_170467	0.91014	1.01683	0.00197664	1.6416	0.959491	0.00837558
11901	18196383	FBtr0082151 // Teh1 // tipE homolog 1 // 85E10-85E13 // 41215 /// FBtr0330082 // Teh1 /	Teh1	FBtr0082151	0.0491294	-1.1159	0.000153384	-1.25958	0.161606	0.00109901
12644	18200503	FBtr0085766 // CG11340 // CG11340 gene product from transcript CG11340-RA // 100C1-100C	CG11340	FBtr0085766	0.186483	1.14432	0.268281	1.11906	0.399524	0.41357
5486	18160130	FBtr0087645 // synaptogyrin // CG10808 gene product from transcript CG10808-RA // 50C6-	synaptogyrin	FBtr0087645	0.250157	1.06419	0.0654032	-1.10672	0.479345	0.139471
6402	18165057	FBtr0330731 // sli // slit // 52C9-52C9|2-77 cM // 36746 /// FBtr0330734 // sli // slit	sli	FBtr0330731	0.0590712	1.0803	0.351432	-1.03799	0.183796	0.502786
13055	18202833	FBtr0301436 // 2mit // CG42573 gene product from transcript CG42573-RA // 87D13-87D14 /	2mit	FBtr0301436	0.937801	1.00458	0.0141531	-1.16305	0.973219	0.0413991
11176	18192018	FBtr0332437 // CG42795 // CG42795 gene product from transcript CG42795-RC // 86A2-86A2	CG42795	FBtr0332437	0.244687	-1.05846	0.441198	1.03808	0.472917	0.591429
4248	18152618	FBtr0072162 // CG11388 // CG11388 gene product from transcript CG11388-RA // 60B4-60B4	CG11388	FBtr0072162	0.134778	1.06026	0.0335668	-1.08843	0.324253	0.0822639
15923	18219112	FBtr0332609 // CG43867 // CG43867 gene product from transcript CG43867-RA // 1D2-1D2 //	CG43867	FBtr0332609	0.0338673	-1.10777	3.1e-05	-1.25187	0.125104	0.000304076
12159	18197889	FBtr0083453 // beat-IIa // beaten path IIa // 90A2-90A3 // 42086 /// NM_079660 // beat-	beat-IIa	FBtr0083453	0.138809	-1.08835	0.000223489	-1.26199	0.329964	0.00146908
14033	18208486	FBtr0073447 // CG15198 // CG15198 gene product from transcript CG15198-RA // 10B1-10B1	CG15198	FBtr0073447	0.583071	-1.08725	0.0412589	1.37868	0.780073	0.0967569
2837	18144665	FBtr0079159 // CG31644 // CG31644 gene product from transcript CG31644-RA // 25F5-25F5	CG31644	FBtr0079159	0.751765	1.04456	0.00137005	1.61667	0.883149	0.00623682
6083	18163223	NR_048190 // CR32835 // ncRNA // 59B7-59B7 // 12798142 /// NR_048191 // CR32835 // ncRN	CR32835	NR_048190	0.35769	-1.15217	0.000551553	1.79368	0.591931	0.00300683
4208	18152407	FBtr0071999 // CG3092 // CG3092 gene product from transcript CG3092-RA // 59D3-59D3 //	CG3092	FBtr0071999	0.958343	-1.00692	0.00251988	1.53773	0.982172	0.0102185
15000	18214256	FBtr0070661 // CG15576 // CG15576 gene product from transcript CG15576-RB // 4B4-4B4 //	CG15576	FBtr0070661	0.30449	-1.16038	0.00151717	1.64145	0.538906	0.00678074
8696	18178200	FBtr0089527 // sff // sugar-free frosting // 72A4-72B1 // 39732 /// NM_140557 // sff //	sff	FBtr0089527	0.0833291	-1.10664	0.0238769	-1.14401	0.233533	0.0627162
769	18133362	FBtr0077628 // CG8813 // CG8813 gene product from transcript CG8813-RA // 23B7-23B8 //	CG8813	FBtr0077628	0.977279	1.00346	0.00291624	1.47432	0.990496	0.0114338
15936	18219216	FBtr0302542 // CG17159 // CG17159 gene product from transcript CG17159-RF // 20E-20E //	CG17159	FBtr0302542	0.21789	-1.0892	0.00925034	-1.20753	0.439963	0.0293972
3170	18146420	FBtr0303799 // CG42820 // CG42820 gene product from transcript CG42820-RA // 29C1-29C1	CG42820	FBtr0303799	0.936238	1.01211	0.000793528	1.74201	0.972508	0.00403991
7801	18173032	FBtr0333466 // AP-2 // CG7807 gene product from transcript CG7807-RF // 78D7-78E1|3-50.	AP-2	FBtr0333466	1.06e-06	-1.4369	8.55e-05	-1.31055	3.24603e-05	0.000683414
727	18133102	FBtr0077891 // CG7295 // CG7295 gene product from transcript CG7295-RB // 22B4-22B4 //	CG7295	FBtr0077891	0.869203	-1.02366	0.000386958	1.75158	0.940171	0.00227273
8807	18178774	FBtr0309797 // CG14077 // CG14077 gene product from transcript CG14077-RB // 75E5-75E5	CG14077	FBtr0309797	0.374548	1.11586	1.03e-05	1.89571	0.609874	0.000124901
11947	18196655	FBtr0082404 // ninaG // CG6728 gene product from transcript CG6728-RB // 86E5-86E5 // 4	ninaG	FBtr0082404	0.005203	-1.21075	8.67e-07	-1.47614	0.0310961	1.72997e-05
8332	18176316	FBtr0300621 // Teh2 // tipE homolog 2 // 64A9-64A10 // 38502 /// NM_001169874 // Teh2 /	Teh2	FBtr0300621	0.00280221	-1.15456	1.66e-05	-1.25276	0.0193394	0.000181965
15352	18215987	FBtr0332534 // CG9059 // CG9059 gene product from transcript CG9059-RF // 15D1-15D1 //	CG9059	FBtr0332534	0.00138175	-1.24026	0.000115669	-1.31026	0.011088	0.000872838
7767	18172671	FBtr0301438 // CG42575 // CG42575 gene product from transcript CG42575-RA // 68A7-68A8	CG42575	FBtr0301438	0.000683802	-1.16679	9.34e-06	-1.24148	0.00636781	0.000115666
13520	18205362	FBtr0333329 // comt // comatose // 11E8-11E8|1-40.1 cM // 47091 /// FBtr0073754 // comt	comt	FBtr0333329	0.166113	-1.06743	0.0959383	-1.08222	0.36956	0.188436
8275	18176026	FBtr0072968 // CG16762 // CG16762 gene product from transcript CG16762-RA // 62E3-62E3	CG16762	FBtr0072968	0.509908	1.08479	5.22e-05	-1.77264	0.728211	0.000463552
13879	18207674	FBtr0070817 // CG15765 // CG15765 gene product from transcript CG15765-RA // 5C2-5C3 //	CG15765	FBtr0070817	3.89e-06	-1.31318	8.1e-10	-1.52703	9.63469e-05	5.41837e-08
5973	18162732	NM_166341 // Rgk1 // CG44011 gene product from transcript CG44011-RC // 56C11-56D1 // 1	Rgk1	NM_166341	4.3e-05	-1.29112	4.91e-05	-1.28794	0.000702549	0.000441062
1211	18135682	NM_165316 // sNPF // short neuropeptide F precursor // 38B1-38B1 // 35286 /// FBtr00813	sNPF	NM_165316	0.184075	-1.06446	0.000132966	-1.22199	0.395898	0.000979364
1576	18137386	FBtr0110769 // BG642163 // CG34102 gene product from transcript CG34102-RA // 25A2-25A2	BG642163	FBtr0110769	0.557077	1.09928	0.584147	1.0922	0.763063	0.714298
2330	18141765	FBtr0079092 // CG7742 // CG7742 gene product from transcript CG7742-RA // 25C10-25D1 //	CG7742	FBtr0079092	0.0115009	1.28379	6.42e-10	2.26359	0.0569186	4.47809e-08
13254	18203983	NM_079900 // mGluRA // metabotropic glutamate receptor // 102F1-102F3 // 43838 /// NM_0	mGluRA	NM_079900	0.0212716	-1.1533	1.12e-07	-1.49598	0.0892991	3.24125e-06
9487	18182329	FBtr0081621 // Dfd // Deformed // 84A5-84A5|3-47.5 cM // 40832 /// NM_057853 // Dfd //	Dfd	FBtr0081621	0.000284952	-1.28952	0.000105499	-1.31813	0.00322314	0.000811477
11216	18192173	NM_001202298 // Rbp // RIM-binding protein // 88F3-88F4 // 41880 /// FBtr0304826 // Rbp	Rbp	NM_001202298	0.141505	-1.08904	0.0151308	-1.15652	0.334415	0.0436582
3043	18145648	FBtr0112611 // Pvf3 // PDGF- and VEGF-related factor 3 // 27E2-27E3 // 33995 /// NM_001	Pvf3	FBtr0112611	0.100663	-1.09282	0.00130743	-1.20369	0.266422	0.00601971
7112	18169303	FBtr0075684 // CG5048 // CG5048 gene product from transcript CG5048-RA // 70F1-70F1 //	CG5048	FBtr0075684	0.696017	-1.04268	3.81e-05	1.66321	0.851795	0.000358425
14423	18210568	FBtr0071493 // X11Lbeta // CG32677 gene product from transcript CG32677-RB // 9D4-9E1 /	X11Lbeta	FBtr0071493	0.0399855	-1.12326	0.000303788	-1.24662	0.14096	0.00188247
1131	18135298	FBtr0080871 // CG4631 // CG4631 gene product from transcript CG4631-RA // 36A7-36A7 //	CG4631	FBtr0080871	0.0659873	-1.11459	1.45e-06	1.4024	0.198205	2.63551e-05
9376	18181742	FBtr0333629 // CG43955 // CG43955 gene product from transcript CG43955-RB // 62E9-62F1	CG43955	FBtr0333629	0.0136528	-1.15918	9.9e-05	-1.28681	0.0646853	0.000772039
2634	18143549	FBtr0080743 // CG15258 // CG15258 gene product from transcript CG15258-RA // 35D2-35D2	CG15258	FBtr0080743	0.450443	-1.11401	0.0156124	1.43536	0.679209	0.0448006
14549	18211463	NM_001272437 // rdgA // retinal degeneration A // 8B8-8C3|1-26.3 cM // 31826 /// NM_001	rdgA	NM_001272437	1.41e-07	-1.3059	7.23e-09	-1.36311	6.0723e-06	3.30555e-07
1198	18135615	FBtr0081248 // CG10137 // CG10137 gene product from transcript CG10137-RA // 37E5-37F1	CG10137	FBtr0081248	0.222183	-1.06079	2.21e-05	-1.26666	0.445093	0.000230342
7748	18172545	FBtr0300858 // CG42529 // CG42529 gene product from transcript CG42529-RA // 76C3-76C3	CG42529	FBtr0300858	0.984446	-1.00297	0.00326628	1.61846	0.994007	0.012547
13248	18203879	FBtr0100343 // sv // shaven // 102F8-102F8 // 43825 /// FBtr0089327 // sv // shaven //	sv	FBtr0100343	0.000413436	-1.19585	0.0107268	1.13063	0.00428372	0.0332162
13231	18203775	FBtr0301942 // CG42402 // CG42402 gene product from transcript CG42402-RD // --- // 735	CG42402	FBtr0301942	0.0173128	-1.12937	8.38e-08	-1.40004	0.0767799	2.56139e-06
10074	18185768	FBtr0082423 // CG14715 // CG14715 gene product from transcript CG14715-RA // 86E15-86E1	CG14715	FBtr0082423	4.67e-25	6.25431	7.67e-22	4.17941	1.90559e-21	2.45918e-18
10769	18189550	FBtr0078908 // CG14645 // CG14645 gene product from transcript CG14645-RA // 82A4-82A4	CG14645	FBtr0078908	0.895509	-1.01606	0.00949261	-1.39487	0.952974	0.0300029
7564	18171599	FBtr0078343 // CG32436 // CG32436 gene product from transcript CG32436-RA // 78C8-78C8	CG32436	FBtr0078343	0.572359	-1.08378	0.000496018	1.73052	0.772598	0.00276851
3469	18148137	NM_143761 // Cyp6a17 // Cytochrome P450-6a17 // 51D1-51D1 // 45556 /// FBtr0087451 // C	Cyp6a17	NM_143761	4.42e-25	169.383	6.1e-25	160.337	1.90559e-21	3.31881e-21
8690	18178150	FBtr0075581 // CG7579 // CG7579 gene product from transcript CG7579-RA // 71F1-71F1 //	CG7579	FBtr0075581	0.0409317	1.23987	0.00281268	1.38694	0.143299	0.011124
15162	18214998	FBtr0073396 // CG1552 // CG1552 gene product from transcript CG1552-RB // 10A3-10A3 //	CG1552	FBtr0073396	0.0117302	-1.11364	7.28e-07	-1.28211	0.0576688	1.51368e-05
14953	18213982	FBtr0070231 // CG14785 // CG14785 gene product from transcript CG14785-RA // 2A4-2A4 //	CG14785	FBtr0070231	0.417378	-1.05823	1.83e-05	1.41646	0.648495	0.000197157
14018	18208412	FBtr0073383 // CG15208 // CG15208 gene product from transcript CG15208-RA // 9F8-9F8 //	CG15208	FBtr0073383	0.307653	-1.18499	0.0520206	1.39189	0.542342	0.116265
14545	18211420	FBtr0302270 // CG42629 // CG42629 gene product from transcript CG42629-RB // 11D9-11D10	CG42629	FBtr0302270	7.68e-05	-1.30998	3.01e-05	-1.33576	0.00112123	0.000297033
14326	18210046	FBtr0091649 // stg1 // stargazin-like protein // 19F1-19F1 // 318064 /// FBtr0100609 //	stg1	FBtr0091649	0.280508	-1.06576	0.0425593	-1.13048	0.511716	0.099137
14466	18210803	FBtr0091649 // stg1 // stargazin-like protein // 19F1-19F1 // 318064 /// FBtr0100609 //	stg1	FBtr0091649	0.280508	-1.06576	0.0425593	-1.13048	0.511716	0.099137
9031	18179900	FBtr0307888 // CG32106 // CG32106 gene product from transcript CG32106-RD // 69E2-69E2	CG32106	FBtr0307888	0.0766835	-1.26159	0.000127298	1.74236	0.220163	0.000946089
2882	18144899	FBtr0080580 // CG31814 // CG31814 gene product from transcript CG31814-RA // 34C6-34D1	CG31814	FBtr0080580	0.0430834	-1.11532	0.000353077	-1.2307	0.148137	0.00211328
894	18133997	NM_078772 // neuroligin // CG13772 gene product from transcript CG13772-RB // 27C3-27C4	neuroligin	NM_078772	0.0230268	-1.14968	2.98e-07	-1.46096	0.0946947	7.41457e-06
13561	18205654	FBtr0112815 // na // narrow abdomen // 12E6-12E7|1-46.9 cM // 45338 /// FBtr0303764 //	na	FBtr0112815	0.118467	-1.09586	0.0217221	-1.14773	0.297116	0.0580465
12557	18200066	NM_001276131 // CG14509 // CG14509 gene product from transcript CG14509-RD // 98F13-99A	CG14509	NM_001276131	6.63e-05	-1.21548	5.82e-06	-1.26005	0.000990979	7.96262e-05
13187	18203589	FBtr0309232 // CG43462 // CG43462 gene product from transcript CG43462-RC // 84F16-85A2	CG43462	FBtr0309232	0.018295	-1.10013	0.231957	1.04781	0.080168	0.370941
1128	18135286	FBtr0080792 // CG13244 // CG13244 gene product from transcript CG13244-RA // 35D6-35D6	CG13244	FBtr0080792	0.792881	-1.03615	0.000713972	1.65505	0.904045	0.00371366
13247	18203867	NM_001014693 // ey // eyeless // 102D4-102D5|4-2.0 cM // 43812 /// FBtr0100396 // ey //	ey	NM_001014693	0.516906	1.04299	1.67e-06	-1.45978	0.734158	2.94043e-05
10863	18190161	FBtr0083662 // CG31231 // CG31231 gene product from transcript CG31231-RA // 91B8-91B8	CG31231	FBtr0083662	0.108172	-1.2053	0.00477716	1.40939	0.279453	0.0171482
5316	18159144	FBtr0088662 // CG13743 // CG13743 gene product from transcript CG13743-RA // 45A1-45A1	CG13743	FBtr0088662	0.00477233	-1.16978	0.00079271	-1.21144	0.0291434	0.00403925
15168	18215031	FBtr0073467 // CG1394 // CG1394 gene product from transcript CG1394-RA // 10A10-10A10 /	CG1394	FBtr0073467	0.27713	-1.16959	0.00544095	1.5269	0.508809	0.0190778
4953	18156498	FBtr0333174 // Peb // Protein ejaculatory bulb // 60F5-60F5 // 38009 /// NM_001274249 /	Peb	FBtr0333174	0.734033	1.06519	0.197162	-1.27477	0.872504	0.328879
1623	18137643	NM_001258910 // chinmo // Chronologically inappropriate morphogenesis // 22A5-22B1 // 3	chinmo	NM_001258910	0.0348745	-1.09501	0.14066	1.06416	0.128001	0.253456
11385	18193344	FBtr0333667 // pum // pumilio // 85C4-85D1|3-48.5 cM // 41094 /// NM_001275474 // pum /	pum	FBtr0333667	0.0178559	1.09567	0.0682697	-1.07143	0.0787011	0.143893
12308	18198714	FBtr0113264 // CG13409 // CG13409 gene product from transcript CG13409-RA // 94A1-94A1	CG13409	FBtr0113264	0.0104821	-1.14419	0.00611298	-1.15659	0.0529896	0.0209482
9378	18181769	NM_168196 // Dscam2 // Down syndrome cell adhesion molecule 2 // 65E6-65E7 // 38788 ///	Dscam2	NM_168196	0.00992294	-1.15646	0.000159632	-1.2552	0.0508356	0.00113332
9009	18179786	FBtr0076588 // CG32023 // CG32023 gene product from transcript CG32023-RA // 66D15-66D1	CG32023	FBtr0076588	0.590977	-1.07766	0.33801	1.14343	0.785299	0.488706
5330	18159245	FBtr0088558 // CG13739 // CG13739 gene product from transcript CG13739-RA // 45C6-45D1	CG13739	FBtr0088558	0.819362	1.01265	0.758253	1.01709	0.91611	0.843928
4352	18153172	FBtr0088121 // lambdaTry // CG12350 gene product from transcript CG12350-RA // 47F3-47F	lambdaTry	FBtr0088121	0.163764	-1.2173	0.00608857	-1.50065	0.36646	0.0208952
3984	18151216	FBtr0086926 // veil // CG4827 gene product from transcript CG4827-RA // 54B16-54B17 //	veil	FBtr0086926	2.48e-07	1.43947	0.00119541	1.21888	9.51798e-06	0.0056132
2387	18142076	FBtr0089641 // CG11319 // CG11319 gene product from transcript CG11319-RA // 26E3-26F1	CG11319	FBtr0089641	0.189164	-1.06127	2.89e-15	-1.89124	0.403336	1.47408e-12
10172	18186312	FBtr0082960 // CG14853 // CG14853 gene product from transcript CG14853-RB // 88C9-88C9	CG14853	FBtr0082960	0.0775083	-1.1085	0.0102573	-1.16674	0.221679	0.0319931
4717	18154898	FBtr0305060 // brp // bruchpilot // 45E3-45F1 // 35977 /// NM_001259299 // brp // bruch	brp	FBtr0305060	0.391349	-1.0429	0.000326213	-1.21563	0.625867	0.00199194
8249	18175864	FBtr0303107 // CG7971 // CG7971 gene product from transcript CG7971-RC // 62A10-62A10 /	CG7971	FBtr0303107	0.0183399	-1.10421	2.82e-05	-1.21561	0.0803176	0.000281173
1316	18136327	FBtr0077657 // v(2)k05816 // CG3524 gene product from transcript CG3524-RB // 23C5-23C5	v(2)k05816	FBtr0077657	0.988541	1.0019	0.284204	-1.15375	0.995278	0.430853
8616	18177845	FBtr0075903 // CG10752 // CG10752 gene product from transcript CG10752-RA // 69F2-69F2	CG10752	FBtr0075903	0.742754	-1.03759	0.000500074	1.54193	0.878368	0.00278669
8966	18179594	FBtr0075802 // CG8750 // CG8750 gene product from transcript CG8750-RA // 70C4-70C4 //	CG8750	FBtr0075802	0.00901625	1.51677	6.14e-07	2.54348	0.0471677	1.32738e-05
15750	18217897	FBtr0309370 // shakB // shaking B // 19E3-19E5 // 33062 /// NM_001258859 // shakB // sh	shakB	FBtr0309370	0.0012074	-1.19889	5.04e-06	-1.32346	0.00999857	7.07942e-05
15383	18216170	FBtr0074591 // Andorra // CG12611 gene product from transcript CG12611-RA // 17A1-17A1	Andorra	FBtr0074591	0.169028	-1.18233	0.0147036	1.3598	0.374288	0.0426933
5634	18160898	FBtr0086808 // CG10911 // CG10911 gene product from transcript CG10911-RA // 55B2-55B2	CG10911	FBtr0086808	0.728207	1.07702	0.704558	1.08434	0.868972	0.8074
6727	18167125	FBtr0072693 // FucTD // CG9169 gene product from transcript CG9169-RA // 62A1-62A1 // 3	FucTD	FBtr0072693	0.163499	1.24435	0.000285872	1.87041	0.366067	0.00178911
3518	18148507	FBtr0087109 // gprs // CG18471 gene product from transcript CG18471-RE // 53C13-53C14 /	gprs	FBtr0087109	0.208478	-1.08247	0.0117555	-1.17961	0.427969	0.0357639
14505	18211113	FBtr0307598 // futsch // CG34387 gene product from transcript CG34387-RF // 2A3-2A3 //	futsch	FBtr0307598	0.110008	1.08617	0.0448458	-1.11074	0.282764	0.103488
13303	18204427	FBtr0089209 // Actbeta // Activin-beta // 102F8-102F8 // 43826 /// NM_143685 // Actbeta	Actbeta	FBtr0089209	0.00180336	-1.23407	0.0054197	-1.20228	0.013558	0.0190156
11981	18196897	FBtr0082549 // dpr15 // CG10095 gene product from transcript CG10095-RA // 87A10-87B1 /	dpr15	FBtr0082549	0.241909	-1.07388	0.00131702	-1.23489	0.469437	0.00605021
4776	18155426	FBtr0072139 // kcc // kazachoc // 60A9-60A11 // 37800 /// NM_131901 // kcc // kazachoc	kcc	FBtr0072139	0.688979	-1.01594	0.00168939	-1.14407	0.847375	0.00736491
7338	18170443	FBtr0078371 // CG7634 // CG7634 gene product from transcript CG7634-RA // 78D6-78D6 //	CG7634	FBtr0078371	0.378071	1.13256	1.2e-05	2.06332	0.613041	0.000140909
8314	18176199	FBtr0073139 // CG10862 // CG10862 gene product from transcript CG10862-RA // 63E6-63E6	CG10862	FBtr0073139	0.528098	1.09226	0.000956651	1.65661	0.742532	0.00468574
6886	18168120	FBtr0333077 // tow // target of wingless // 65D3-65D3 // 38755 /// NM_001274559 // tow	tow	FBtr0333077	0.0547479	-1.115	5.87e-05	-1.28847	0.174122	0.000510443
6874	18168042	NM_001274534 // CG13293 // CG13293 gene product from transcript CG13293-RC // 65A5-65A5	CG13293	NM_001274534	0.0144958	-1.16148	0.000160327	-1.2817	0.0675808	0.00113579
2483	18142737	FBtr0079778 // CG9582 // CG9582 gene product from transcript CG9582-RA // 29F8-29F8 //	CG9582	FBtr0079778	0.973333	1.00484	0.000556404	1.73638	0.988781	0.00302822
3609	18149067	FBtr0085966 // CG7882 // CG7882 gene product from transcript CG7882-RC // 42A4-42A4 //	CG7882	FBtr0085966	0.612553	1.07361	0.403012	-1.12492	0.800039	0.555055
532	18132027	NM_165375 // dtr // defective transmitter release // 39D1-39D2 // 318856 /// FBtr008151	dtr	NM_165375	0.371056	1.08219	5.21e-09	2.00256	0.606029	2.53088e-07
7328	18170375	FBtr0307386 // CG10508 // CG10508 gene product from transcript CG10508-RK // 78C2-78C2	CG10508	FBtr0307386	2.75e-12	-1.5832	1.33e-10	-1.47856	5.61069e-10	1.27696e-08
3948	18151028	FBtr0113085 // CG4409 // CG4409 gene product from transcript CG4409-RB // 53C4-53C4 //	CG4409	FBtr0113085	0.00145361	1.30055	0.141404	1.12017	0.0115062	0.254521
447	18131412	FBtr0301863 // tutl // turtle // 24E1-24E1 // 46015 /// FBtr0333485 // tutl // turtle /	tutl	FBtr0301863	0.000214854	-1.23359	1.81e-09	-1.52197	0.00258236	1.05135e-07
2608	18143444	FBtr0080487 // CG15482 // CG15482 gene product from transcript CG15482-RA // 34A9-34A9	CG15482	FBtr0080487	0.640678	-1.05769	0.00151178	1.51301	0.818931	0.00676406
6742	18167237	FBtr0072766 // CG12035 // CG12035 gene product from transcript CG12035-RA // 62B1-62B1	CG12035	FBtr0072766	0.333978	1.13353	2.11e-06	2.10008	0.569255	3.53225e-05
9640	18183293	FBtr0083205 // Sap47 // Synapse-associated protein 47kD // 89A8-89A8 // 41938 /// NM_16	Sap47	FBtr0083205	0.0390434	-1.0642	1.53e-06	-1.18653	0.138596	2.74727e-05
10248	18186681	FBtr0083330 // CG17560 // CG17560 gene product from transcript CG17560-RA // 89D5-89D5	CG17560	FBtr0083330	0.057762	1.3809	0.0195222	1.49695	0.181081	0.0535712
5357	18159434	FBtr0088365 // CG12912 // CG12912 gene product from transcript CG12912-RA // 46F7-46F7	CG12912	FBtr0088365	0.510329	-1.03655	0.0137629	-1.15116	0.728684	0.0405264
5580	18160602	FBtr0087126 // CG7813 // CG7813 gene product from transcript CG7813-RA // 53C6-53C6 //	CG7813	FBtr0087126	0.668353	1.05942	0.00121446	1.60848	0.835696	0.00568426
7765	18172657	FBtr0301333 // CG42570 // CG42570 gene product from transcript CG42570-RA // 71F2-71F2	CG42570	FBtr0301333	0.590086	-1.07264	0.00116152	1.58556	0.785072	0.00548404
12961	18202233	FBtr0111047 // CG34155 // CG34155 gene product from transcript CG34155-RA // 99F8-99F8	CG34155	FBtr0111047	0.0234158	-1.14186	1.97e-05	-1.32291	0.0959319	0.000210159
13377	18204934	FBtr0302337 // CG40378 // CG40378 gene product from transcript CG40378-RB // --- // 335	CG40378	FBtr0302337	0.201393	-1.07811	0.000149744	-1.28249	0.419355	0.00107766
3615	18149106	FBtr0085978 // CG14589 // CG14589 gene product from transcript CG14589-RA // 42A11-42A1	CG14589	FBtr0085978	0.489659	1.06701	3.1e-05	1.57137	0.711558	0.000304076
14300	18209877	FBtr0074788 // CG12531 // CG12531 gene product from transcript CG12531-RA // 18E3-18E4	CG12531	FBtr0074788	0.590358	-1.03229	0.00185623	-1.21993	0.785119	0.00795054
8914	18179350	FBtr0078393 // CG7202 // CG7202 gene product from transcript CG7202-RA // 78D4-78D4 //	CG7202	FBtr0078393	0.785686	-1.03716	0.000402743	1.6945	0.90037	0.00234141
4348	18153146	FBtr0086177 // CG30160 // CG30160 gene product from transcript CG30160-RA // 42E4-42E5	CG30160	FBtr0086177	6.75e-06	1.70469	0.0797728	1.19578	0.000154738	0.163042
4416	18153530	FBtr0086177 // CG30160 // CG30160 gene product from transcript CG30160-RA // 42E4-42E5	CG30160	FBtr0086177	6.75e-06	1.70469	0.0797728	1.19578	0.000154738	0.163042
2614	18143462	FBtr0302042 // CG9395 // CG9395 gene product from transcript CG9395-RB // 34B6-34B7 //	CG9395	FBtr0302042	0.885462	-1.00914	0.936833	-1.00502	0.947457	0.961033
10525	18188237	FBtr0302170 // Bili // Band4.1 inhibitor LRP interactor // 96C1-96C1 // 43019 /// NM_00	Bili	FBtr0302170	0.478832	1.04336	0.0342764	-1.1401	0.703556	0.0836262
11899	18196377	FBtr0082153 // CG9459 // CG9459 gene product from transcript CG9459-RA // 85E10-85E10 /	CG9459	FBtr0082153	0.24801	-1.21667	0.0175881	-1.51856	0.477051	0.04919
1042	18134869	FBtr0080103 // CG17098 // CG17098 gene product from transcript CG17098-RA // 32A2-32A2	CG17098	FBtr0080103	0.364919	1.11395	2.99e-05	1.77393	0.599156	0.000295238
10145	18186139	FBtr0309090 // CG14372 // CG14372 gene product from transcript CG14372-RD // 87E12-87E1	CG14372	FBtr0309090	0.808119	1.01378	0.00095635	-1.22627	0.912432	0.00468574
13314	18204553	FBtr0089139 // Syt7 // CG2381 gene product from transcript CG2381-RB // 102B3-102B3 //	Syt7	FBtr0089139	2.52e-14	-1.95656	4.05e-14	-1.93326	9.86912e-12	1.29616e-11
5339	18159297	FBtr0088496 // CG1690 // CG1690 gene product from transcript CG1690-RB // 46B2-46B2 //	CG1690	FBtr0088496	0.993418	1.00109	0.000197854	1.74153	0.996838	0.00134277
3092	18145990	FBtr0299711 // CG42313 // CG42313 gene product from transcript CG42313-RA // 35B7-35B7	CG42313	FBtr0299711	0.404853	-1.05065	0.0181134	-1.15718	0.638314	0.0503657
5282	18158959	FBtr0088802 // CG2291 // CG2291 gene product from transcript CG2291-RA // 44C3-44C3 //	CG2291	FBtr0088802	0.000450946	1.8425	6.06e-08	3.00872	0.00458588	1.95091e-06
15069	18214567	FBtr0071064 // CG15034 // CG15034 gene product from transcript CG15034-RA // 7B2-7B2 //	CG15034	FBtr0071064	0.218041	-1.15942	0.00507345	1.42602	0.440099	0.0180294
15539	18216981	FBtr0077328 // CG15458 // CG15458 gene product from transcript CG15458-RA // 19D1-19D1	CG15458	FBtr0077328	0.962178	1.00549	0.000249366	1.60596	0.983694	0.00160876
9381	18181804	FBtr0308060 // CG43392 // CG43392 gene product from transcript CG43392-RA // 79B1-79B1	CG43392	FBtr0308060	0.878658	-1.02005	0.286682	1.15007	0.944923	0.433703
12921	18202078	FBtr0300407 // CG34034 // CG34034 gene product from transcript CG34034-RB // 93F7-93F7	CG34034	FBtr0300407	0.0766289	1.31775	0.820364	1.0351	0.220054	0.886402
10077	18185777	FBtr0082426 // CG14718 // CG14718 gene product from transcript CG14718-RA // 86E16-86E1	CG14718	FBtr0082426	0.859933	1.02893	0.0181772	1.49139	0.93603	0.0504915
722	18133087	FBtr0077926 // CG14346 // CG14346 gene product from transcript CG14346-RA // 22A1-22A1	CG14346	FBtr0077926	0.282355	-1.16155	0.00722132	1.48242	0.513493	0.0239889
2202	18141107	FBtr0301417 // IA-2 // IA-2 ortholog // 21E3-21E3 // 33277 /// NM_164401 // IA-2 // IA-	IA-2	FBtr0301417	0.0560294	-1.09143	0.0153538	-1.11972	0.177231	0.0441984
7964	18174085	FBtr0078405 // Pc // Polycomb // 78C6-78C7 // 40358 /// NM_079475 // Pc // Polycomb //	Pc	FBtr0078405	0.148558	1.06222	0.00842461	-1.12148	0.344868	0.0272668
10610	18188650	NM_143306 // Cyp6a18 // CG13977 gene product from transcript CG13977-RA // 98A2-98A2 //	Cyp6a18	NM_143306	0.576006	1.09241	0.019584	-1.46961	0.775403	0.0537033
11026	18190945	NM_001104215 // Cdep // CG44193 gene product from transcript CG44193-RE // 82E2-82E3 //	Cdep	NM_001104215	0.329018	-1.04849	0.000863421	-1.19252	0.564235	0.00432824
15679	18217721	NM_001014759 // D2R // Dopamine 2-like receptor // 19A4-19A4 // 33007 /// FBtr0070034 /	D2R	NM_001014759	0.00379393	-1.19521	0.00267978	-1.20436	0.0243945	0.0107021
8053	18174687	FBtr0306578 // n-syb // n-synaptobrevin // 62A9-62A9 // 38196 /// NM_001259618 // n-syb	n-syb	FBtr0306578	0.0910178	1.08143	0.000283414	-1.20154	0.248926	0.0017785
1314	18136323	FBtr0081386 // CG18810 // CG18810 gene product from transcript CG18810-RA // 38D2-38D2	CG18810	FBtr0081386	0.479526	-1.08849	0.000445701	1.59262	0.703788	0.00253387
9572	18182868	FBtr0089475 // Syn // Synapsin // 85F16-86A1 // 41247 /// FBtr0089477 // Syn // Synapsi	Syn	FBtr0089475	0.0834336	-1.09118	4.43e-06	-1.31098	0.233786	6.35382e-05
2883	18144913	FBtr0305220 // CG31820 // CG31820 gene product from transcript CG31820-RB // 35E1-35E1	CG31820	FBtr0305220	0.826009	-1.03875	0.00100432	1.86426	0.919868	0.00487003
9256	18180929	FBtr0076933 // CG32388 // CG32388 gene product from transcript CG32388-RA // 65D5-65D5	CG32388	FBtr0076933	0.481789	-1.09714	0.00173628	1.56264	0.705256	0.00753511
9402	18181840	FBtr0076933 // CG32388 // CG32388 gene product from transcript CG32388-RA // 65D5-65D5	CG32388	FBtr0076933	0.481789	-1.09714	0.00173628	1.56264	0.705256	0.00753511
5803	18161801	FBtr0071975 // Klp59C // CG3219 gene product from transcript CG3219-RA // 59C4-59C4 //	Klp59C	FBtr0071975	0.535504	-1.10541	0.00817897	1.57137	0.747498	0.0265719
12079	18197424	NM_001275653 // btsz // bitesize // 88D5-88D5 // 3346167 /// NM_001014622 // btsz // bi	btsz	NM_001275653	0.22612	1.08431	0.0204897	-1.17361	0.449885	0.0556055
806	18133573	FBtr0077468 // CG2955 // CG2955 gene product from transcript CG2955-RA // 24D6-24D6 //	CG2955	FBtr0077468	0.829813	-1.03749	0.0451517	1.42535	0.921312	0.104077
11185	18192084	FBtr0303835 // CG42828 // CG42828 gene product from transcript CG42828-RB // 94F1-94F1	CG42828	FBtr0303835	0.546874	-1.10133	0.00760409	1.57211	0.755426	0.0250138
7133	18169431	FBtr0306308 // Toll-6 // CG7250 gene product from transcript CG7250-RC // 71C2-71C2 //	Toll-6	FBtr0306308	0.000219285	-1.29225	2.24e-05	-1.35741	0.00262788	0.00023243
11320	18192875	NM_079757 // nAcRalpha-96Aa // nicotinic Acetylcholine Receptor alpha 96Aa // 96A1-96A2	nAcRalpha-96Aa	NM_079757	0.695757	-1.0226	0.00011225	-1.28439	0.851708	0.000855742
345	18130772	FBtr0290322 // cup // CG11181 gene product from transcript CG11181-RB // 26F6-26F7|2-23	cup	FBtr0290322	0.722591	1.03686	0.000144839	1.54886	0.865307	0.00104976
2148	18140836	FBtr0112943 // CG4587 // CG4587 gene product from transcript CG4587-RD // 35D3-35D3 //	CG4587	FBtr0112943	0.0408117	-1.13706	3.98e-05	-1.33365	0.143038	0.000370997
5194	18158329	FBtr0301868 // Menl-2 // Malic enzyme like-2 // 53C4-53C4 // 3772692 /// FBtr0301869 //	Menl-2	FBtr0301868	0.488295	-1.09194	0.000327046	1.6596	0.710567	0.00199404
11898	18196374	FBtr0082154 // CG16904 // CG16904 gene product from transcript CG16904-RA // 85E10-85E1	CG16904	FBtr0082154	0.81151	1.05159	0.477774	-1.16218	0.913343	0.624458
12746	18200975	FBtr0300961 // CG31004 // CG31004 gene product from transcript CG31004-RC // 100B5-100B	CG31004	FBtr0300961	0.15215	1.19794	0.697623	-1.04943	0.349981	0.80193
4197	18152309	FBtr0304921 // PIP5K59B // CG3682 gene product from transcript CG3682-RG // 59B4-59B4 /	PIP5K59B	FBtr0304921	0.00490952	-1.18083	1.42e-06	-1.38589	0.0297893	2.58964e-05
1085	18135053	FBtr0080336 // CG17211 // CG17211 gene product from transcript CG17211-RA // 33D2-33D2	CG17211	FBtr0080336	0.00844887	-1.21465	3.93e-07	-1.55679	0.0450662	9.29644e-06
11675	18195183	NM_169968 // GABA-B-R2 // metabotropic GABA-B receptor subtype 2 // 93F9-93F9 // 42561	GABA-B-R2	NM_169968	0.0126424	-1.17105	3.11e-06	-1.40274	0.0613587	4.82982e-05
11532	18194247	FBtr0301327 // CASK // CASK ortholog // 93F10-93F12 // 42567 /// NM_001170210 // CASK /	CASK	FBtr0301327	0.00487155	-1.12066	4.55e-09	-1.35219	0.0296139	2.25046e-07
7269	18170062	FBtr0074943 // CG9368 // CG9368 gene product from transcript CG9368-RD // 76B9-76B9 //	CG9368	FBtr0074943	0.994934	-1.00041	0.00165954	-1.24601	0.997473	0.00725999
14599	18211788	FBtr0307165 // CG14446 // CG14446 gene product from transcript CG14446-RC // 5E1-5E1 //	CG14446	FBtr0307165	3.39e-05	-1.22701	2.41e-05	-1.23317	0.000581214	0.000246776
15388	18216191	FBtr0307553 // CG6123 // CG6123 gene product from transcript CG6123-RB // 17A5-17A6 //	CG6123	FBtr0307553	0.873943	-1.01011	0.291269	-1.06986	0.942732	0.438448
11008	18190874	FBtr0301680 // CG34139 // CG34139 gene product from transcript CG34139-RD // 92D5-92D8	CG34139	FBtr0301680	0.326993	-1.06681	3.72e-06	-1.4396	0.562073	5.55008e-05
5252	18158759	FBtr0088948 // CG1358 // CG1358 gene product from transcript CG1358-RD // 43E3-43E5 //	CG1358	FBtr0088948	2.24e-05	1.24627	0.0904678	-1.08022	0.000414058	0.179673
9466	18182207	FBtr0301118 // CG40467 // CG40467 gene product from transcript CG40467-RB // --- // 335	CG40467	FBtr0301118	0.23222	-1.0929	0.000239352	-1.35346	0.457103	0.00155708
14544	18211412	FBtr0309877 // rad // radish // 11E1-11E1 // 32251 /// NM_001258721 // rad // radish //	rad	FBtr0309877	0.783621	1.01812	0.0177108	-1.17637	0.899013	0.0494315
11549	18194407	NM_170420 // DopR2 // Dopamine receptor 2 // 99B5-99B6 // 43484 /// NM_079824 // DopR2	DopR2	NM_170420	0.0333702	-1.14946	0.00386707	-1.21571	0.123986	0.0144303
13876	18207664	FBtr0070814 // CG12239 // CG12239 gene product from transcript CG12239-RA // 5C2-5C2 //	CG12239	FBtr0070814	0.000259143	-1.2648	4.21e-09	-1.58291	0.00301049	2.10784e-07
14146	18209015	NM_001258746 // rab3-GEF // CG5627 gene product from transcript CG5627-RH // 13A11-13A1	rab3-GEF	NM_001258746	0.156153	-1.09207	0.00888267	-1.18438	0.35562	0.0284448
1876	18139010	NM_164693 // eya // eyes absent // 26E1-26E2|2-17 cM // 33916 /// NM_078768 // eya // e	eya	NM_164693	2.49e-07	-1.45532	2.62e-10	-1.68627	9.51798e-06	2.19015e-08
15681	18217739	FBtr0302909 // CG33639 // CG33639 gene product from transcript CG33639-RD // 17A2-17A2	CG33639	FBtr0302909	0.951786	1.004	0.873262	-1.0106	0.980104	0.920048
12631	18200435	FBtr0085717 // CG12071 // CG12071 gene product from transcript CG12071-RB // 100A6-100A	CG12071	FBtr0085717	2.97e-06	-1.38448	2.2e-06	-1.39278	7.73147e-05	3.66039e-05
4520	18154062	NM_176229 // Hs3st-A // Heparan sulfate 3-O sulfotransferase-A // 55E9-55F1 // 37161 //	Hs3st-A	NM_176229	0.0198622	-1.15018	0.00777953	-1.17605	0.0850229	0.0254668
4519	18154050	FBtr0071858 // CG33143 // CG33143 gene product from transcript CG33143-RC // 58F2-58F2	CG33143	FBtr0071858	0.0695479	1.09589	0.502074	-1.03363	0.20572	0.645874
13263	18204093	FBtr0089079 // CG1909 // CG1909 gene product from transcript CG1909-RA // 102C6-102C6 /	CG1909	FBtr0089079	0.000118348	-1.26289	7.35e-07	-1.38783	0.00158594	1.52242e-05
9566	18182823	NM_079532 // Mst84Da // Male-specific RNA 84Da // 84D5-84D5 // 40889 /// FBtr0081584 //	Mst84Da	NM_079532	0.863448	1.02829	0.000167947	1.99007	0.937519	0.0011795
7837	18173224	FBtr0305205 // Shab // Shaker cognate b // 63A1-63A2|3-14 cM // 38352 /// FBtr0333898 /	Shab	FBtr0305205	4.02e-05	-1.23591	0.00016608	-1.20885	0.000666136	0.00116947
7733	18172466	NM_138180 // RhoGEF3 // CG43976 gene product from transcript CG43976-RM // 61B3-61C1 //	RhoGEF3	NM_138180	0.354465	-1.06135	0.00271075	-1.22931	0.589223	0.0107993
5459	18159999	FBtr0087794 // Drl-2 // Derailed 2 // 49F1-49F1 // 36436 /// NM_136991 // Drl-2 // Dera	Drl-2	FBtr0087794	0.000496768	-1.27081	8.01e-08	-1.53665	0.00492603	2.47144e-06
13090	18203101	FBtr0082548 // Cpn // Calphotin // 87A9-87B5 // 41474 /// NM_169455 // Cpn // Calphotin	Cpn	FBtr0082548	0.330379	-1.06251	8.58e-06	-1.38571	0.565009	0.000108141
4414	18153516	FBtr0086165 // CG30158 // CG30158 gene product from transcript CG30158-RA // 42D6-42E1	CG30158	FBtr0086165	0.0945939	-1.11447	0.0212345	-1.16477	0.255285	0.0572497
5776	18161659	FBtr0071846 // Liprin-gamma // CG11206 gene product from transcript CG11206-RA // 58D3-	Liprin-gamma	FBtr0071846	8.45e-05	-1.23056	3.58e-09	-1.4517	0.00120455	1.83686e-07
6085	18163240	FBtr0086653 // CG33136 // CG33136 gene product from transcript CG33136-RA // 55E6-55E6	CG33136	FBtr0086653	0.197125	-1.20152	0.0325233	1.36582	0.413876	0.0801639
14865	18213444	NM_001258793 // RSG7 // Regulator of G-protein signalling 7 // 15B1-15B1 // 32674 /// F	RSG7	NM_001258793	0.421871	-1.04833	0.015932	-1.15936	0.652585	0.0456054
4234	18152539	FBtr0301162 // CG5549 // CG5549 gene product from transcript CG5549-RB // 60A2-60A3 //	CG5549	FBtr0301162	0.378462	-1.05679	0.0685027	-1.12376	0.613493	0.144252
4964	18156605	FBtr0071923 // robo // roundabout // 59A2-59A3 // 37603 /// FBtr0071922 // robo // roun	robo	FBtr0071923	0.54072	1.01817	0.363233	-1.02723	0.751202	0.514956
9332	18181493	FBtr0333432 // CG42841 // CG42841 gene product from transcript CG42841-RB // 62C1-62C1	CG42841	FBtr0333432	0.0807532	1.30135	9.1e-06	2.16677	0.228313	0.000113295
2651	18143648	FBtr0080970 // CG6380 // CG6380 gene product from transcript CG6380-RA // 36C5-36C5 //	CG6380	FBtr0080970	0.854071	1.0324	0.013774	1.56673	0.933036	0.0405445
10251	18186698	NM_142321 // VhaM9.7-d // Vacuolar H[+] ATPase subunit M9.7-d // 89E5-89E5 // 42041 ///	VhaM9.7-d	NM_142321	0.818459	-1.03386	0.0087647	1.49549	0.915814	0.0281609
2942	18145298	FBtr0309285 // CG33543 // CG33543 gene product from transcript CG33543-RD // 22B8-22B8	CG33543	FBtr0309285	0.000140503	-1.27109	3.8e-05	-1.30381	0.00181288	0.000357691
15744	18217883	FBtr0112528 // CG34326 // CG34326 gene product from transcript CG34326-RA // 15D4-15D4	CG34326	FBtr0112528	6.24e-05	-1.35426	1.79e-07	-1.54959	0.000943923	4.81324e-06
6846	18167917	FBtr0073353 // CG13704 // CG13704 gene product from transcript CG13704-RA // 64C2-64C2	CG13704	FBtr0073353	1.37e-05	1.56032	6.56e-05	1.48847	0.000277433	0.000556798
3806	18150223	FBtr0087999 // CG13168 // CG13168 gene product from transcript CG13168-RC // 48F1-48F1	CG13168	FBtr0087999	0.7069	-1.04311	0.000411073	1.5529	0.857121	0.00238265
10370	18187318	FBtr0084001 // CG5697 // CG5697 gene product from transcript CG5697-RA // 93B4-93B4 //	CG5697	FBtr0084001	0.409017	-1.09699	0.0384644	-1.27012	0.64159	0.0913897
7364	18170575	FBtr0078513 // CG11404 // CG11404 gene product from transcript CG11404-RA // 79E8-79E8	CG11404	FBtr0078513	0.369702	1.1344	5.44e-05	1.91104	0.604465	0.00047892
9705	18183784	FBtr0083260 // Mst89B // CG6864 gene product from transcript CG6864-RA // 89B9-89B9 //	Mst89B	FBtr0083260	0.214075	-1.16135	0.0016934	1.49984	0.434864	0.00737979
9696	18183725	NM_079644 // Rh6 // Rhodopsin 6 // 88F6-88F6 // 41889 /// FBtr0083146 // Rh6 // Rhodops	Rh6	NM_079644	0.930767	1.00876	0.00413339	-1.36113	0.969488	0.0152429
5273	18158908	FBtr0088827 // CG12769 // CG12769 gene product from transcript CG12769-RB // 44A4-44A4	CG12769	FBtr0088827	0.110227	-1.07522	0.00135291	-1.16803	0.283125	0.00618896
852	18133799	FBtr0079109 // CG18266 // CG18266 gene product from transcript CG18266-RA // 25F1-25F1	CG18266	FBtr0079109	0.538205	1.08857	0.000289335	1.74499	0.74941	0.00180594
4070	18151706	FBtr0086471 // CG15125 // CG15125 gene product from transcript CG15125-RA // 56E1-56E1	CG15125	FBtr0086471	0.0376854	-1.26487	0.00277554	1.42155	0.135317	0.0110072
611	18132513	FBtr0080625 // CG15286 // CG15286 gene product from transcript CG15286-RA // 35A4-35A4	CG15286	FBtr0080625	0.504094	1.08026	1.78e-05	1.78338	0.723735	0.000192405
7070	18169093	FBtr0075923 // CG17666 // CG17666 gene product from transcript CG17666-RA // 69E2-69E2	CG17666	FBtr0075923	0.910179	1.01899	0.000852105	1.84181	0.959491	0.00428732
14247	18209603	FBtr0100239 // Frq1 // Frequenin 1 // 16F7-17A1 // 32797 /// NM_001038764 // Frq1 // Fr	Frq1	FBtr0100239	2.07e-05	-1.2903	3.91e-06	-1.32906	0.000387016	5.74946e-05
9064	18180058	FBtr0073336 // CG32240 // CG32240 gene product from transcript CG32240-RA // 64B3-64B3	CG32240	FBtr0073336	1.4e-07	-2.2611	0.0746825	-1.24891	6.06122e-06	0.154849
2703	18143890	FBtr0081225 // CG17564 // CG17564 gene product from transcript CG17564-RB // 37D2-37D2	CG17564	FBtr0081225	1.31e-07	2.28524	3.77e-12	3.7734	5.70182e-06	6.34371e-10
993	18134573	FBtr0079868 // CG17633 // CG17633 gene product from transcript CG17633-RA // 30C8-30C8	CG17633	FBtr0079868	0.0163483	1.49408	0.429756	-1.13487	0.073696	0.58038
13834	18207473	FBtr0070647 // CG15572 // CG15572 gene product from transcript CG15572-RA // 4B4-4B4 //	CG15572	FBtr0070647	0.893765	1.01947	0.00338213	1.57553	0.952221	0.0129221
12666	18200563	NM_143634 // Smvt // Sodium-dependent multivitamin transporter // 100D2-100D2 // 43744	Smvt	NM_143634	0.176687	-1.25294	0.0245918	-1.47016	0.385761	0.0642117
6027	18162946	FBtr0088773 // spaw // spacewatch // 44C4-44C4 // 246568 /// NM_165602 // spaw // space	spaw	FBtr0088773	0.511029	-1.1336	0.159059	1.31276	0.729173	0.278708
5754	18161552	FBtr0071740 // CG4363 // CG4363 gene product from transcript CG4363-RA // 58A2-58A2 //	CG4363	FBtr0071740	0.563735	-1.09307	0.433332	-1.12869	0.766965	0.584002
2587	18143329	NM_135724 // Oatp33Ea // Organic anion transporting polypeptide 33Ea // 33E5-33E5 // 34	Oatp33Ea	NM_135724	0.703245	-1.02185	0.000472808	-1.24568	0.856173	0.00266661
15683	18217755	FBtr0302415 // CG33666 // CG33666 gene product from transcript CG33666-RB // 6A2-6A2 //	CG33666	FBtr0302415	0.0154942	-1.29346	0.606619	1.05364	0.0707421	0.732084
14420	18210549	FBtr0089803 // Muc11A // Mucin 11A // 11A2-11A3 // 32174 /// NM_167319 // Muc11A // Muc	Muc11A	FBtr0089803	0.73377	1.05583	0.424118	-1.1368	0.872417	0.575576
10226	18186575	FBtr0303260 // GATAe // CG10278 gene product from transcript CG10278-RB // 89A12-89A12	GATAe	FBtr0303260	0.0272223	1.22317	0.346011	-1.08672	0.107091	0.497191
11003	18190831	FBtr0110787 // CG34107 // CG34107 gene product from transcript CG34107-RA // 86A1-86A1	CG34107	FBtr0110787	0.840428	-1.03376	0.0213861	1.48642	0.926731	0.0574875
12368	18199041	FBtr0300585 // CG10164 // CG10164 gene product from transcript CG10164-RB // 95A2-95A2	CG10164	FBtr0300585	0.678315	-1.05263	0.000380791	1.62934	0.840902	0.00224157
2789	18144368	NR_073803 // CR17567 // ncRNA // 37C7-37C7 // 14462800 /// NR_073801 // CR17567 // ncRN	CR17567	NR_073803	0.152176	-1.2658	0.608339	1.08668	0.349981	0.73344
10879	18190237	FBtr0083256 // CG31287 // CG31287 gene product from transcript CG31287-RA // 89B7-89B7	CG31287	FBtr0083256	0.693319	1.06077	0.000769309	1.73812	0.849959	0.00394615
4973	18156677	FBtr0100119 // hig // hikaru genki // 45B7-45B8 // 35949 /// NM_001014514 // hig // hik	hig	FBtr0100119	0.834418	1.01103	0.00771621	-1.15989	0.923786	0.025295
10245	18186669	FBtr0083301 // CG14891 // CG14891 gene product from transcript CG14891-RA // 89B20-89B2	CG14891	FBtr0083301	0.352942	-1.12516	0.000524002	1.62237	0.588549	0.0028914
6404	18165084	FBtr0331500 // CG43775 // CG43775 gene product from transcript CG43775-RA // 60B11-60B1	CG43775	FBtr0331500	0.744819	-1.03182	3.63e-05	1.58325	0.879599	0.000345474
6405	18165095	FBtr0331500 // CG43775 // CG43775 gene product from transcript CG43775-RA // 60B11-60B1	CG43775	FBtr0331500	0.744819	-1.03182	3.63e-05	1.58325	0.879599	0.000345474
6406	18165106	FBtr0331500 // CG43775 // CG43775 gene product from transcript CG43775-RA // 60B11-60B1	CG43775	FBtr0331500	0.744819	-1.03182	3.63e-05	1.58325	0.879599	0.000345474
11571	18194534	FBtr0085168 // side // sidestep // 97F6-98A1 // 43300 /// FBtr0309180 // side // sidest	side	FBtr0085168	0.0812235	-1.10141	0.00286149	-1.18954	0.229206	0.0112651
14373	18210286	NR_002111 // CR32658 // ncRNA // 11A3-11A3 // 3772624 /// NR_002110 // CR32658 // ncRNA	CR32658	NR_002111	0.607282	-1.07487	0.00853596	1.47778	0.797045	0.0275866
3270	18146796	NM_001273513 // CG43778 // CG43778 gene product from transcript CG43778-RD // 34B5-34B6	CG43778	NM_001273513	0.0471294	-1.13334	0.000219007	-1.28822	0.156761	0.00144722
15469	18216612	FBtr0077293 // CG1324 // CG1324 gene product from transcript CG1324-RA // 19E2-19E2 //	CG1324	FBtr0077293	0.26225	-1.19528	0.0398279	1.39824	0.492528	0.094036
8852	18179020	NM_079452 // sNPF-R // short neuropeptide F receptor // 76E2-76E4 // 40195 /// NM_00127	sNPF-R	NM_079452	0.00215348	-1.19468	1.27e-06	-1.37463	0.0156149	2.35289e-05
4259	18152671	FBtr0100568 // CG3257 // CG3257 gene product from transcript CG3257-RB // 60B11-60B11 /	CG3257	FBtr0100568	0.0593864	-1.13022	0.0269403	-1.15635	0.184582	0.069041
6166	18163706	FBtr0112412 // CG34219 // CG34219 gene product from transcript CG34219-RA // 44F7-44F7	CG34219	FBtr0112412	0.0562532	1.14293	4.83e-06	-1.45044	0.177698	6.8374e-05
2801	18144446	FBtr0089855 // rho-5 // rhomboid-5 // 31D10-31D11 // 2768944 /// NM_205957 // rho-5 //	rho-5	FBtr0089855	0.829043	-1.01353	0.000172834	-1.30125	0.921103	0.00120401
11144	18191806	FBtr0304685 // CG42613 // CG42613 gene product from transcript CG42613-RE // 91E1-91E1	CG42613	FBtr0304685	0.420042	-1.02639	0.000540984	-1.13083	0.650961	0.00296325
9079	18180126	FBtr0299807 // CG32298 // CG32298 gene product from transcript CG32298-RB // 62E1-62E1	CG32298	FBtr0299807	0.376442	-1.15127	0.0452421	1.38757	0.611554	0.10425
10777	18189612	FBtr0301640 // 7B2 // CG1168 gene product from transcript CG1168-RB // 83A1-83A1 // 406	7B2	FBtr0301640	0.868063	-1.00736	0.384352	-1.03938	0.939728	0.535775
12296	18198643	FBtr0084095 // CG16791 // CG16791 gene product from transcript CG16791-RA // 93D5-93D6	CG16791	FBtr0084095	0.0160621	1.10928	0.0139238	-1.11201	0.0728347	0.0408969
15393	18216226	FBtr0074626 // CG15043 // CG15043 gene product from transcript CG15043-RA // 17B5-17B5	CG15043	FBtr0074626	0.0170764	1.43568	0.0394693	1.36134	0.0760286	0.0933784
10122	18185985	FBtr0082684 // beat-Vb // CG31298 gene product from transcript CG31298-RB // 87D4-87D4	beat-Vb	FBtr0082684	0.00372198	-1.22729	0.000926914	-1.27	0.0241334	0.00458277
455	18131473	FBtr0332374 // ms(2)35Ci // CG31733 gene product from transcript CG31733-RC // 35D1-35D	ms(2)35Ci	FBtr0332374	0.845036	-1.02721	0.000669408	1.6736	0.928237	0.00352113
487	18131665	FBtr0080252 // kek2 // kekkon-2 // 32F4-32F4 // 34582 /// NM_078827 // kek2 // kekkon-2	kek2	FBtr0080252	0.32322	-1.06982	0.32447	-1.06963	0.558678	0.474042
14122	18208928	FBtr0073854 // CG11068 // CG11068 gene product from transcript CG11068-RA // 12D1-12D1	CG11068	FBtr0073854	0.761575	-1.0481	0.0139415	1.49181	0.888268	0.0409383
7882	18173527	NR_048242 // mir-4940 // mir-4940 stem loop // 67A1-67A1 // 12798373 /// FBtr0309276 //	mir-4940	NR_048242	0.0584032	-1.11064	0.108098	-1.09237	0.182372	0.206941
7851	18173327	FBtr0306161 // CG43219 // CG43219 gene product from transcript CG43219-RA // 78C2-78C2	CG43219	FBtr0306161	0.383535	-1.05727	0.351114	-1.06146	0.617834	0.502445
13858	18207566	NM_001272323 // SK // small conductance calcium-activated potassium channel // 4F5-4F9	SK	NM_001272323	0.045343	-1.11102	0.000178769	-1.23962	0.152686	0.00123481
5284	18158963	FBtr0089732 // CG18449 // CG18449 gene product from transcript CG18449-RA // 44C4-44C4	CG18449	FBtr0089732	0.668936	-1.05271	0.000527819	1.58432	0.835955	0.00290648
11244	18192367	FBtr0306945 // CG43343 // CG43343 gene product from transcript CG43343-RB // 94A6-94A11	CG43343	FBtr0306945	0.0603837	-1.17109	0.000100984	1.43504	0.186876	0.000784513
12600	18200306	FBtr0085572 // CG15531 // CG15531 gene product from transcript CG15531-RA // 99E2-99E2	CG15531	FBtr0085572	0.141029	1.24717	0.0479542	-1.35135	0.333486	0.109088
2217	18141187	FBtr0077917 // CG10869 // CG10869 gene product from transcript CG10869-RA // 22A3-22A3	CG10869	FBtr0077917	0.566285	1.07563	7.04e-06	1.96926	0.768705	9.17787e-05
3758	18149980	FBtr0088215 // CG12309 // CG12309 gene product from transcript CG12309-RA // 47B7-47B7	CG12309	FBtr0088215	0.845361	-1.03079	0.0153368	1.48539	0.928407	0.044165
14637	18212004	FBtr0330260 // CG43737 // CG43737 gene product from transcript CG43737-RB // 13B1-13B1	CG43737	FBtr0330260	0.337477	-1.05852	0.0567207	-1.12249	0.572826	0.124686
4477	18153823	FBtr0300226 // CG30395 // CG30395 gene product from transcript CG30395-RB // 58A1-58A1	CG30395	FBtr0300226	0.0517195	-1.38736	0.211342	-1.22937	0.167726	0.346065
6202	18163967	FBtr0112411 // whip // whipple // 44C4-44C4 // 5740782 /// NM_001103760 // whip // whip	whip	FBtr0112411	0.508753	1.08134	7.7e-07	2.0566	0.727052	1.58286e-05
15174	18215054	FBtr0073539 // CG1561 // CG1561 gene product from transcript CG1561-RB // 10C7-10C7 //	CG1561	FBtr0073539	0.285785	-1.08333	0.321549	-1.07706	0.517425	0.471124
4668	18154558	NM_166696 // NaCP60E // Na channel protein 60E // 60E5-60E5 // 37981 /// FBtr0308342 //	NaCP60E	NM_166696	0.391837	-1.04507	0.00186563	-1.18845	0.626525	0.00797768
695	18132939	NM_001258897 // GABA-B-R3 // metabotropic GABA-B receptor subtype 3 // 21E2-21E2 // 332	GABA-B-R3	NM_001258897	0.0898831	-1.10421	0.0434268	-1.12663	0.246899	0.100755
5394	18159623	FBtr0088177 // CG18335 // CG18335 gene product from transcript CG18335-RA // 47F1-47F1	CG18335	FBtr0088177	0.640312	-1.05557	0.00106868	1.51227	0.818931	0.00512902
7411	18170792	FBtr0331536 // dpr6 // CG14162 gene product from transcript CG14162-RE // 67D2-67D8 //	dpr6	FBtr0331536	0.0669572	1.12504	0.077779	-1.11986	0.199992	0.159936
6712	18167033	NM_138229 // Glut1 // Glucose transporter 1 // 61D4-61E // 38109 /// FBtr0333501 // Glu	Glut1	NM_138229	0.000374117	1.21609	0.00884158	1.14678	0.00399107	0.0283465
6517	18165833	FBtr0077054 // Ets65A // Ets at 65A // 65A6-65A6 // 38700 /// NM_168156 // Ets65A // Et	Ets65A	FBtr0077054	0.129681	-1.09469	0.00714582	-1.18221	0.315542	0.0237883
8779	18178610	FBtr0075157 // CG5506 // CG5506 gene product from transcript CG5506-RA // 75A8-75A8 //	CG5506	FBtr0075157	0.0386495	1.32152	0.649833	1.06097	0.137587	0.76532
2331	18141773	FBtr0329970 // CG14024 // CG14024 gene product from transcript CG14024-RB // 25D5-25D5	CG14024	FBtr0329970	0.777714	1.0178	0.623331	-1.03122	0.895605	0.746059
3460	18148087	FBtr0305217 // chn // charlatan // 51E1-51E2 // 36678 /// NM_001259405 // chn // charla	chn	FBtr0305217	0.655284	-1.02513	0.00266875	-1.19696	0.828791	0.0106737
8757	18178508	FBtr0075241 // Mip // Myoinhibiting peptide precursor // 74A5-74A5 // 39933 /// NM_1407	Mip	FBtr0075241	0.015885	-1.19804	2.78e-08	-1.6838	0.0722818	1.0151e-06
6246	18164298	FBtr0091491 // Vmat // Vesicular monoamine transporter // 50B2-50B3 // 3346192 /// NM_0	Vmat	FBtr0091491	2.02e-06	-1.30104	3.22e-11	-1.57092	5.54125e-05	4.07417e-09
13337	18204776	NM_001103381 // dpr7 // CG33481 gene product from transcript CG33481-RF // 102B1-102B1	dpr7	NM_001103381	0.00148948	-1.20367	3.1e-06	-1.35232	0.0117276	4.81888e-05
1941	18139454	FBtr0332219 // Syt1 // Synaptotagmin 1 // 23A6-23B1 // 33473 /// FBtr0332220 // Syt1 //	Syt1	FBtr0332219	0.136275	-1.07058	0.00146672	-1.16844	0.325997	0.00659136
14812	18213040	NM_080340 // nAcRalpha-7E // nicotinic Acetylcholine Receptor alpha 7E // 7E1-7E2 // 31	nAcRalpha-7E	NM_080340	0.439735	-1.05258	2.18e-05	-1.38683	0.669717	0.000227797
1440	18136991	FBtr0273450 // beat-IIIb // CG33179 gene product from transcript CG33179-RC // 36B5-36B	beat-IIIb	FBtr0273450	0.26703	1.07672	0.00956424	-1.19801	0.498338	0.030189
11073	18191230	NM_079499 // 5-HT2 // Serotonin receptor 2 // 82C3-82D5 // 40575 /// FBtr0078854 // 5-H	5-HT2	NM_079499	0.336614	-1.06106	0.00534078	-1.19954	0.572016	0.0188155
13246	18203851	FBtr0089070 // zfh2 // Zn finger homeodomain 2 // 102C3-102C4 // 43795 /// FBtr0307167	zfh2	FBtr0089070	0.279105	-1.05505	0.00151308	-1.18445	0.510709	0.00676746
4960	18156553	FBtr0088257 // Rab3 // CG7576 gene product from transcript CG7576-RA // 47B7-47B7 // 36	Rab3	FBtr0088257	7.66e-06	-1.27062	1.7e-07	-1.34908	0.000171024	4.59394e-06
9814	18184455	FBtr0332448 // CG1090 // CG1090 gene product from transcript CG1090-RI // 82A4-82A4 //	CG1090	FBtr0332448	0.0021232	-1.22822	8.32e-08	-1.53214	0.0154365	2.54782e-06
15321	18215832	FBtr0074236 // CG9919 // CG9919 gene product from transcript CG9919-RA // 14B13-14B14 /	CG9919	FBtr0074236	0.000553997	1.21953	0.0308743	1.12367	0.00540633	0.0769124
5473	18160074	FBtr0087754 // CG4734 // CG4734 gene product from transcript CG4734-RA // 50A1-50A1 //	CG4734	FBtr0087754	0.784836	1.0372	0.324565	-1.14199	0.899648	0.474096
8435	18176849	FBtr0076866 // CG14835 // CG14835 gene product from transcript CG14835-RA // 66A1-66A1	CG14835	FBtr0076866	0.0101121	1.49548	4.44e-07	2.54489	0.0516038	1.02503e-05
2827	18144601	FBtr0307507 // CG31601 // CG31601 gene product from transcript CG31601-RC // 40D4-40D5	CG31601	FBtr0307507	0.0253928	1.39906	4.28e-07	2.48673	0.101609	9.93715e-06
9565	18182821	NM_079815 // Mst98Cb // Male-specific RNA 98Cb // 98C3-98C3 // 43367 /// FBtr0085278 //	Mst98Cb	NM_079815	0.70097	-1.06306	0.000517993	1.84269	0.855036	0.00286989
1977	18139703	NM_078870 // Acp36DE // Accessory gland peptide 36DE // 36F3-36F3 // 35096 /// FBtr0081	Acp36DE	NM_078870	0.901489	1.02564	0.293946	1.24186	0.955439	0.441379
10615	18188687	FBtr0330111 // CG18437 // CG18437 gene product from transcript CG18437-RF // 98A15-98B1	CG18437	FBtr0330111	0.723351	1.02205	0.450469	1.04776	0.865904	0.60016
1092	18135086	NM_135726 // Oatp33Eb // Organic anion transporting polypeptide 33Eb // 33E5-33E5 // 34	Oatp33Eb	NM_135726	0.99848	-1.00021	0.218932	-1.14819	0.999276	0.355584
10345	18187160	FBtr0083828 // CG4836 // CG4836 gene product from transcript CG4836-RC // 92C1-92C1 //	CG4836	FBtr0083828	0.866931	-1.03201	0.022574	1.56466	0.939079	0.0598929
10416	18187585	FBtr0301485 // Nrx-1 // Neurexin 1 // 94A16-94B1 // 42646 /// FBtr0084256 // Nrx-1 // N	Nrx-1	FBtr0301485	0.00377794	-1.1884	6.67e-05	-1.28882	0.0243345	0.000564082
9841	18184613	FBtr0078679 // CG14669 // CG14669 gene product from transcript CG14669-RB // 83A2-83A4	CG14669	FBtr0078679	0.199622	1.07785	0.136682	1.09133	0.416804	0.248184
15530	18216921	NM_130646 // PsGEF // Protostome-specific GEF // 3A2-3A2 // 31224 /// FBtr0333526 // Ps	PsGEF	NM_130646	0.0540145	-1.12791	0.571104	-1.03501	0.172608	0.704586
1232	18135789	FBtr0329987 // tadr // torn and diminished rhabdomeres // 39A1-39A1 // 35370 /// FBtr03	tadr	FBtr0329987	0.929191	-1.00418	0.000297976	-1.20856	0.96878	0.00184997
4470	18153798	NM_206057 // Mal-A6 // Maltase A6 // 44D1-44D1 // 246565 /// FBtr0273322 // Mal-A6 // M	Mal-A6	NM_206057	3.94e-11	4.73292	1.21e-09	3.81532	5.46372e-09	7.50936e-08
4354	18153178	NM_166375 // Obp56f // Odorant-binding protein 56f // 56E2-56E2 // 246668 /// FBtr00863	Obp56f	NM_166375	0.366852	-1.1617	0.424475	1.14164	0.601603	0.575917
3093	18146011	FBtr0299786 // Pde1c // CG44007 gene product from transcript CG44007-RG // 33A8-33B1 //	Pde1c	FBtr0299786	4.82e-05	-1.24906	2.31e-09	-1.47809	0.000767532	1.2781e-07
2318	18141712	FBtr0079056 // Jon25Biii // Jonah 25Biii // 25B4-25B4 // 33706 /// NM_135037 // Jon25Bi	Jon25Biii	FBtr0079056	0.523518	1.1286	0.386991	-1.17882	0.738408	0.538534
13117	18203237	NR_048426 // mir-997 // mir-997 stem loop // 92A2-92A2 // 12798474 /// NR_074029 // CR4	mir-997	NR_048426	0.994941	1.00099	0.000228925	1.90895	0.997473	0.0014964
7559	18171569	FBtr0077037 // CG32406 // CG32406 gene product from transcript CG32406-RA // 65A2-65A3	CG32406	FBtr0077037	0.00704362	-1.19707	5.97e-06	-1.4042	0.0393355	8.10668e-05
2548	18143129	FBtr0301184 // CG7309 // CG7309 gene product from transcript CG7309-RC // 32B4-32B4 //	CG7309	FBtr0301184	0.870135	-1.0258	0.0100576	1.52755	0.940802	0.0314785
4513	18154010	FBtr0087135 // CG33017 // CG33017 gene product from transcript CG33017-RB // 53A4-53A4	CG33017	FBtr0087135	0.445558	1.11184	3.14e-06	2.17721	0.6749	4.85792e-05
13904	18207824	FBtr0112955 // CG15894 // CG15894 gene product from transcript CG15894-RB // 5F1-5F1 //	CG15894	FBtr0112955	0.0348838	-1.16336	0.0185497	-1.18581	0.128007	0.0513689
5483	18160121	FBtr0087650 // CG6220 // CG6220 gene product from transcript CG6220-RA // 50C2-50C2 //	CG6220	FBtr0087650	0.0455473	1.36212	4.36e-06	2.27983	0.153188	6.26995e-05
2120	18140655	FBtr0080272 // Mst33A // CG6541 gene product from transcript CG6541-RB // 32F3-32F3 //	Mst33A	FBtr0080272	0.949335	1.01085	0.0021895	1.75566	0.978964	0.0090957
6720	18167073	FBtr0072655 // CG9130 // CG9130 gene product from transcript CG9130-RB // 61F4-61F4 //	CG9130	FBtr0072655	0.75969	1.05503	0.00121479	1.85563	0.887164	0.00568426
12232	18198293	FBtr0083775 // CG3581 // CG3581 gene product from transcript CG3581-RA // 92A3-92A3 //	CG3581	FBtr0083775	0.867674	1.02276	0.00102552	1.62507	0.939635	0.00495656
10902	18190367	FBtr0309516 // CG31419 // CG31419 gene product from transcript CG31419-RB // 90A1-90A1	CG31419	FBtr0309516	0.177169	-1.20091	0.046921	-1.3157	0.386546	0.107276
14083	18208738	FBtr0073689 // CG3812 // CG3812 gene product from transcript CG3812-RB // 11B16-11C1 //	CG3812	FBtr0073689	9.94e-06	-1.29066	1.43e-07	-1.38742	0.000214321	3.98301e-06
10609	18188647	FBtr0085182 // CG13978 // CG13978 gene product from transcript CG13978-RA // 98A1-98A2	CG13978	FBtr0085182	0.773218	1.04499	0.00133709	1.70525	0.893991	0.00612861
7108	18169284	FBtr0075744 // CG13482 // CG13482 gene product from transcript CG13482-RA // 70D5-70D5	CG13482	FBtr0075744	0.0434216	1.24072	0.768393	1.0309	0.148924	0.849961
14540	18211378	FBtr0073767 // Syt12 // Synaptotagmin 12 // 11F1-11F1 // 32290 /// FBtr0331598 // Syt12	Syt12	FBtr0073767	0.498881	-1.04565	0.0216577	-1.17088	0.719259	0.057979
15800	18218253	FBtr0299863 // CG42340 // CG42340 gene product from transcript CG42340-RD // 6A3-6B1 //	CG42340	FBtr0299863	0.0832299	-1.12262	0.000433295	-1.28981	0.233409	0.00247888
2633	18143543	FBtr0080683 // CG15278 // CG15278 gene product from transcript CG15278-RA // 35B6-35B6	CG15278	FBtr0080683	0.983843	-1.00299	0.000741287	1.72928	0.993693	0.0038301
2565	18143235	FBtr0080270 // CG6555 // CG6555 gene product from transcript CG6555-RA // 32F3-32F3 //	CG6555	FBtr0080270	0.0250371	1.57507	6.33e-05	2.43907	0.10058	0.000539803
2824	18144589	FBtr0080270 // CG6555 // CG6555 gene product from transcript CG6555-RA // 32F3-32F3 //	CG6555	FBtr0080270	0.0250371	1.57507	6.33e-05	2.43907	0.10058	0.000539803
4297	18152888	FBtr0072377 // CG3611 // CG3611 gene product from transcript CG3611-RA // 60E2-60E2 //	CG3611	FBtr0072377	0.466692	-1.10041	0.00093339	1.60807	0.692234	0.00460651
5076	18157431	FBtr0087477 // mspo // M-spondin // 51B9-51C1 // 36632 /// NM_166063 // mspo // M-spond	mspo	FBtr0087477	0.347421	-1.04805	0.077222	-1.09408	0.582437	0.159083
6042	18163025	FBtr0071620 // CG30393 // CG30393 gene product from transcript CG30393-RA // 57D4-57D5	CG30393	FBtr0071620	0.716508	-1.04944	0.000176361	1.7524	0.861853	0.0012218
5612	18160789	FBtr0086903 // CG6484 // CG6484 gene product from transcript CG6484-RA // 54C10-54C10 /	CG6484	FBtr0086903	0.0013926	-1.48851	0.0669833	-1.23998	0.0111422	0.141932
15606	18217326	FBtr0073633 // CG32655 // CG32655 gene product from transcript CG32655-RA // 11A7-11A7	CG32655	FBtr0073633	0.63077	-1.0913	0.0420867	1.46461	0.811246	0.0983027
14822	18213121	FBtr0301619 // stnA // stoned A // 20F3-20F3 // 3355164 /// FBtr0302020 // stnB // ston	stnA	FBtr0301619	0.0383763	-1.13328	0.00121351	-1.2288	0.137003	0.00568184
14823	18213132	FBtr0301619 // stnA // stoned A // 20F3-20F3 // 3355164 /// FBtr0302020 // stnB // ston	stnA	FBtr0301619	0.0383763	-1.13328	0.00121351	-1.2288	0.137003	0.00568184
3344	18147223	NM_166201 // Pkc53E // Protein C kinase 53E // 53E2-53E2 // 48311 /// NM_001103880 // P	Pkc53E	NM_166201	0.631383	-1.02547	0.0728159	-1.1012	0.811507	0.151556
13931	18208002	FBtr0071046 // CG1958 // CG1958 gene product from transcript CG1958-RA // 7A7-7A7 // 31	CG1958	FBtr0071046	0.913453	-1.01792	0.0193114	1.49193	0.960803	0.0531177
10925	18190455	FBtr0081582 // CG31496 // CG31496 gene product from transcript CG31496-RA // 84D5-84D5	CG31496	FBtr0081582	0.600985	-1.07809	0.586823	-1.08128	0.793183	0.716336
15460	18216556	FBtr0306678 // CG1504 // CG1504 gene product from transcript CG1504-RE // 19C3-19C4 //	CG1504	FBtr0306678	0.0295608	-1.15279	0.374246	-1.0578	0.113768	0.525971
457	18131481	FBtr0303877 // Sema-1a // CG18405 gene product from transcript CG18405-RD // 29E1-29E3	Sema-1a	FBtr0303877	0.458152	-1.03734	0.0018382	-1.18084	0.685292	0.00788518
8958	18179565	FBtr0073257 // Teh3 // tipE homolog 3 // 64A10-64A10 // 50170 /// NM_144078 // Teh3 //	Teh3	FBtr0073257	0.224223	-1.0705	0.0484683	-1.11946	0.447749	0.110058
2125	18140689	FBtr0080512 // CG9254 // CG9254 gene product from transcript CG9254-RA // 34C5-34C5 //	CG9254	FBtr0080512	0.315391	-1.18758	0.0361799	1.44618	0.550518	0.0872015
6230	18164189	NM_138562 // Mppe // Metallophosphoesterase // 48D7-48D7 // 36285 /// NM_165861 // Mppe	Mppe	NM_138562	0.0288872	-1.12884	4.6e-07	-1.39885	0.111756	1.05599e-05
9941	18185112	FBtr0081837 // CG7443 // CG7443 gene product from transcript CG7443-RA // 84F12-84F12 /	CG7443	FBtr0081837	0.235811	1.18436	0.288738	-1.16308	0.461998	0.435844
13336	18204765	FBtr0300992 // CG32017 // CG32017 gene product from transcript CG32017-RC // 102F8-102F	CG32017	FBtr0300992	0.00103362	-1.23622	0.000109749	-1.29603	0.00888402	0.000839027
12744	18200969	FBtr0084473 // CG31468 // CG31468 gene product from transcript CG31468-RB // 95A8-95A8	CG31468	FBtr0084473	0.158883	-1.23436	0.0245143	1.41174	0.359707	0.0640606
12910	18201968	FBtr0300491 // dpr4 // CG33512 gene product from transcript CG33512-RB // 86E8-86E8 //	dpr4	FBtr0300491	0.688976	-1.02733	0.0641897	-1.13664	0.847375	0.137404
14182	18209201	FBtr0301666 // CG8909 // CG8909 gene product from transcript CG8909-RC // 14A1-14A1 //	CG8909	FBtr0301666	0.223663	-1.07894	0.0276452	-1.1519	0.447381	0.0704148
915	18134146	NM_164765 // Ntl // Neurotransmitter transporter-like // 28C1-28C1 // 34046 /// FBtr007	Ntl	NM_164765	0.112183	1.20568	2.85e-06	1.92057	0.286774	4.51628e-05
10442	18187736	FBtr0084350 // CG17110 // CG17110 gene product from transcript CG17110-RA // 94D13-94D1	CG17110	FBtr0084350	0.879316	-1.02064	0.964712	-1.00597	0.945066	0.977832
3665	18149415	FBtr0088829 // CG12825 // CG12825 gene product from transcript CG12825-RA // 43E16-43E1	CG12825	FBtr0088829	0.0109376	-1.27755	0.000523414	-1.4193	0.054745	0.0028914
940	18134302	FBtr0079597 // Scgalpha // Sarcoglycan alpha // 29A3-29A3 // 34135 /// FBtr0329935 // S	Scgalpha	FBtr0079597	3e-05	-1.31559	0.235919	-1.07025	0.000524823	0.375241
7018	18168852	FBtr0300348 // CG14142 // CG14142 gene product from transcript CG14142-RC // 68A9-68B1	CG14142	FBtr0300348	0.010646	1.22958	0.227468	-1.09814	0.0535647	0.365534
15813	18218358	FBtr0332388 // CG42541 // CG42541 gene product from transcript CG42541-RE // 3F6-3F7 //	CG42541	FBtr0332388	0.00333854	-1.26293	0.000395115	-1.33858	0.0220525	0.00230984
2848	18144736	FBtr0077807 // Tengl1 // Testis EndoG-Like 1 // 22D5-22D5 // 318883 /// NM_164467 // Te	Tengl1	FBtr0077807	0.842299	-1.03134	0.00112057	1.7375	0.927383	0.00532148
9363	18181649	FBtr0305902 // CG43169 // CG43169 gene product from transcript CG43169-RA // 66E3-66E3	CG43169	FBtr0305902	0.423944	1.11117	0.000115981	1.77452	0.654176	0.000874384
1886	18139090	FBtr0080325 // esc // extra sexcombs // 33A2-33A2 // 34595 /// NM_058083 // esc // extr	esc	FBtr0080325	0.000195937	-1.24152	2.38e-07	-1.40087	0.00238841	6.11754e-06
536	18132061	FBtr0078070 // Pph13 // PvuII-PstI homology 13 // 21E2-21E2 // 33239 /// NM_057982 // P	Pph13	FBtr0078070	0.899063	1.00952	0.00461511	-1.25376	0.95409	0.0166907
5180	18158231	NM_078951 // sut4 // sugar transporter 4 // 46E3-46E4 // 36055 /// FBtr0089674 // sut4	sut4	NM_078951	0.0310553	1.44977	1.58e-05	2.31509	0.11795	0.000175314
2878	18144879	FBtr0273383 // CG31805 // CG31805 gene product from transcript CG31805-RB // 36B4-36B4	CG31805	FBtr0273383	0.31885	-1.14724	0.000961043	1.63985	0.553246	0.00469926
6778	18167427	FBtr0072979 // CG2113 // CG2113 gene product from transcript CG2113-RA // 63A2-63A2 //	CG2113	FBtr0072979	0.000101573	-2.11169	0.360688	-1.16842	0.00140142	0.51206
6898	18168181	FBtr0076854 // CG8562 // CG8562 gene product from transcript CG8562-RA // 65F11-65F11 /	CG8562	FBtr0076854	0.213628	1.20591	0.589721	-1.08367	0.434331	0.718637
10620	18188738	FBtr0085246 // CG5017 // CG5017 gene product from transcript CG5017-RA // 98B5-98B5 //	CG5017	FBtr0085246	0.986453	-1.00357	0.318217	1.23534	0.994475	0.467165
14280	18209746	NM_133142 // Hs3st-B // Heparan sulfate 3-O sulfotransferase-B // 18B5-18B6 // 32918 //	Hs3st-B	NM_133142	0.219934	-1.08614	0.0073042	-1.20865	0.442198	0.0241922
7705	18172239	NM_001275222 // Rab26 // CG34410 gene product from transcript CG34410-RE // 78C7-78C7 /	Rab26	NM_001275222	0.000475215	1.30391	0.0174178	1.18614	0.00476522	0.0488057
10553	18188370	FBtr0084883 // CG5079 // CG5079 gene product from transcript CG5079-RA // 96E4-96E5 //	CG5079	FBtr0084883	0.153802	1.11112	0.00307667	-1.26038	0.352182	0.0119578
13340	18204828	FBtr0307045 // Lin29 // CG2052 gene product from transcript CG2052-RC // 102B6-102B7 //	Lin29	FBtr0307045	0.000435073	-1.27068	3.7e-06	-1.40715	0.00445779	5.53542e-05
946	18134328	FBtr0079604 // CG14274 // CG14274 gene product from transcript CG14274-RA // 29A5-29B1	CG14274	FBtr0079604	6.7e-05	-1.28061	2.13e-06	-1.3663	0.000998698	3.55479e-05
12949	18202166	NR_003917 // snoRNA:Psi18S-1377c // ncRNA // 99E2-99E2 // 5740236 /// BT023903 // RpS7	snoRNA:Psi18S-1377c	NR_003917	0.0365713	-1.17152	3.93e-05	-1.41475	0.132413	0.000367385
12950	18202167	---	NA	---	0.0365713	-1.17152	3.93e-05	-1.41475	0.132413	0.000367385
9026	18179865	FBtr0076147 // CG32086 // CG32086 gene product from transcript CG32086-RB // 68C13-68C1	CG32086	FBtr0076147	0.740256	-1.04204	0.000207837	1.67747	0.876493	0.00139184
6075	18163186	FBtr0089419 // Cyp12d1-p // CG30489 gene product from transcript CG30489-RA // 47D4-47D	Cyp12d1-p	FBtr0089419	1.04e-06	1.72488	0.788582	1.02463	3.21494e-05	0.864654
4851	18155857	NM_001038859 // Ih // I[[h]] channel // 50E6-50F1 // 36589 /// FBtr0100372 // Ih // I[[	Ih	NM_001038859	0.45175	-1.03033	0.00145537	-1.14684	0.680334	0.00655794
9636	18183278	NM_001104255 // Dh44 // Diuretic hormone 44 // 85E2-85E2 // 41170 /// FBtr0112870 // Dh	Dh44	NM_001104255	0.594492	-1.03293	0.000862535	-1.24878	0.788117	0.00432646
10512	18188169	FBtr0084718 // Trf4-2 // CG17462 gene product from transcript CG17462-RA // 96B9-96B9 /	Trf4-2	FBtr0084718	0.3539	1.11981	8.6e-07	2.08843	0.589123	1.7201e-05
15782	18218090	FBtr0333155 // CG43921 // CG43921 gene product from transcript CG43921-RA // 11B1-11B1	CG43921	FBtr0333155	0.0832607	1.118	0.0963523	-1.11279	0.233409	0.189045
2464	18142632	FBtr0079701 // Bace // beta-site APP-cleaving enzyme // 29D2-29D2 // 34182 /// NM_13539	Bace	FBtr0079701	0.87463	1.02876	0.4094	-1.16075	0.942927	0.561296
11409	18193512	NM_079566 // betaTub85D // beta-Tubulin at 85D // 85D15-85D15|3-48.5 cM // 41124 /// FB	betaTub85D	NM_079566	0.833867	-1.03573	0.0309833	1.45512	0.923469	0.0771016
10817	18189844	NM_143557 // PH4alphaNE3 // prolyl-4-hydroxylase-alpha NE3 // 100A1-100A1 // 326114 ///	PH4alphaNE3	NM_143557	0.0149975	-1.41391	0.0216424	-1.38438	0.0693847	0.057979
15678	18217705	NM_001014714 // Nmdar2 // NMDA receptor 2 // 2B1-2B1 // 31107 /// NM_001169166 // Nmdar	Nmdar2	NM_001014714	0.777691	1.01916	0.179031	-1.09593	0.895605	0.305792
7036	18168947	FBtr0076028 // CG14131 // CG14131 gene product from transcript CG14131-RA // 68D4-68D4	CG14131	FBtr0076028	0.725804	-1.02555	0.01158	-1.21084	0.86717	0.0352958
1837	18138749	NM_001273114 // CG43798 // CG43798 gene product from transcript CG43798-RA // 25A2-25A2	CG43798	NM_001273114	0.0045149	-1.51634	0.000951375	-1.64291	0.0279879	0.00466877
14709	18212473	FBtr0302902 // Sh // Shaker // 16F3-16F6|1-57.6 cM // 32780 /// NM_001201739 // Sh // S	Sh	FBtr0302902	0.0103028	-1.14465	0.00319007	-1.17128	0.052436	0.0122977
2153	18140880	FBtr0305559 // CG4168 // CG4168 gene product from transcript CG4168-RB // 35C3-35C3 //	CG4168	FBtr0305559	0.211931	-1.08654	0.000252587	-1.30877	0.432068	0.00162372
13578	18205850	FBtr0111036 // shi // shibire // 13F18-13F18|1-51.5 cM // 45928 /// FBtr0111037 // shi	shi	FBtr0111036	0.0130363	-1.09239	0.0338313	-1.07733	0.0626187	0.0827754
11679	18195226	FBtr0085681 // jdp // CG2239 gene product from transcript CG2239-RB // 99F7-99F7 // 436	jdp	FBtr0085681	0.00332645	1.20198	0.101809	1.10243	0.0220024	0.197355
6985	18168694	FBtr0076394 // CG16719 // CG16719 gene product from transcript CG16719-RA // 67C4-67C5	CG16719	FBtr0076394	0.314811	1.16905	0.000412609	1.83086	0.550203	0.00238985
15627	18217444	NM_167188 // Erk7 // Extracellularly regulated kinase 7 // 8D3-8D4 // 31877 /// FBtr007	Erk7	NM_167188	0.485971	-1.08761	0.000999519	1.54151	0.708469	0.00484963
8406	18176684	FBtr0076963 // eIF4E-4 // CG10124 gene product from transcript CG10124-RA // 65C1-65C1	eIF4E-4	FBtr0076963	0.341996	1.15431	0.0303075	1.40152	0.577117	0.0757316
3792	18150165	FBtr0088032 // Sln // Silnoon // 48C4-48C5 // 36263 /// NM_136862 // Sln // Silnoon //	Sln	FBtr0088032	0.969139	1.00253	0.0614402	-1.13379	0.987285	0.132754
7571	18171642	FBtr0078501 // CG32450 // CG32450 gene product from transcript CG32450-RA // 79E1-79E1	CG32450	FBtr0078501	0.620298	-1.08011	0.00826556	1.54418	0.804916	0.0267945
7923	18173731	NM_079252 // Arr2 // Arrestin 2 // 66D9-66D9 // 38993 /// FBtr0076599 // Arr2 // Arrest	Arr2	NM_079252	1.82e-07	-1.34377	1.4e-11	-1.58095	7.48263e-06	2.00446e-09
12032	18197189	FBtr0082765 // CG9813 // CG9813 gene product from transcript CG9813-RC // 87E8-87E8 //	CG9813	FBtr0082765	0.338177	-1.04086	3.38e-05	-1.22055	0.573657	0.000326054
14632	18211944	FBtr0310495 // CG43689 // CG43689 gene product from transcript CG43689-RE // 4A5-4A5 //	CG43689	FBtr0310495	0.0076516	-1.20104	0.0191259	-1.17204	0.041747	0.0526696
10541	18188326	FBtr0084821 // CG11878 // CG11878 gene product from transcript CG11878-RA // 96C8-96C8	CG11878	FBtr0084821	0.000919037	-1.79924	0.0118624	-1.53501	0.00810401	0.0360153
3839	18150421	FBtr0087854 // CG12374 // CG12374 gene product from transcript CG12374-RA // 49C3-49C3	CG12374	FBtr0087854	0.0533455	1.43019	0.00642037	-1.68317	0.171115	0.0217594
6425	18165226	FBtr0308893 // CG40498 // CG40498 gene product from transcript CG40498-RF // --- // 335	CG40498	FBtr0308893	0.483963	-1.05436	0.00291786	-1.27307	0.707406	0.0114374
15079	18214601	FBtr0307270 // dpr14 // CG10946 gene product from transcript CG10946-RB // 7C2-7C2 // 3	dpr14	FBtr0307270	1.41e-09	1.75649	4.34e-08	1.61273	1.13931e-07	1.46358e-06
13616	18206183	FBtr0070764 // CanB // Calcineurin B // 4F5-4F5 // 44317 /// NM_080002 // CanB // Calci	CanB	FBtr0070764	0.756331	1.01855	1.09e-07	-1.49611	0.885495	3.16565e-06
4196	18152302	FBtr0071899 // CG13532 // CG13532 gene product from transcript CG13532-RA // 59B4-59B4	CG13532	FBtr0071899	0.899085	1.0082	0.00291613	-1.2293	0.95409	0.0114338
2138	18140753	FBtr0300615 // beat-Ib // beaten path Ib // 35D6-35D7 // 34939 /// FBtr0080808 // beat-	beat-Ib	FBtr0300615	0.68596	-1.02907	0.0043464	-1.24115	0.845446	0.015892
12230	18198257	FBtr0301693 // unc79 // CG5237 gene product from transcript CG5237-RB // 91F12-91F12 //	unc79	FBtr0301693	0.871165	-1.01023	0.0070046	-1.19697	0.941167	0.0234041
12012	18197081	FBtr0082688 // beat-Va // CG10134 gene product from transcript CG10134-RC // 87D2-87D2	beat-Va	FBtr0082688	0.329311	-1.06741	0.0385265	-1.15287	0.564235	0.091506
3312	18147015	FBtr0087625 // fas // faint sausage // 50B6-50C3|2-68 cM // 36521 /// NM_079007 // fas	fas	FBtr0087625	0.00165192	-1.23648	1.77e-07	-1.50945	0.0127182	4.7752e-06
5628	18160873	FBtr0300215 // dpr13 // CG33996 gene product from transcript CG33996-RB // 55A3-55A3 //	dpr13	FBtr0300215	0.0449494	-1.14589	0.00514439	-1.2168	0.151772	0.0182417
7212	18169774	FBtr0075219 // CG18265 // CG18265 gene product from transcript CG18265-RB // 74C2-74C2	CG18265	FBtr0075219	0.00883153	-1.23118	0.000799979	-1.3185	0.0466047	0.00406641
5303	18159053	FBtr0088682 // CG8252 // CG8252 gene product from transcript CG8252-RA // 44F6-44F6 //	CG8252	FBtr0088682	0.372014	-1.14008	0.0186591	1.43236	0.606958	0.051628
14393	18210379	FBtr0301043 // CG32568 // CG32568 gene product from transcript CG32568-RB // 15A3-15A3	CG32568	FBtr0301043	0.54502	-1.1033	0.0106498	1.54753	0.754202	0.0330405
14431	18210632	NM_001272437 // rdgA // retinal degeneration A // 8B8-8C3|1-26.3 cM // 31826 /// NM_001	rdgA	NM_001272437	0.000118036	-1.16761	6.55e-07	-1.24481	0.00158306	1.40117e-05
2187	18141036	FBtr0078098 // CG11911 // CG11911 gene product from transcript CG11911-RA // 21B8-21B8	CG11911	FBtr0078098	0.0163493	1.52486	0.762649	1.05193	0.073696	0.846676
8920	18179393	FBtr0301161 // CG7166 // CG7166 gene product from transcript CG7166-RB // 78E1-78E1 //	CG7166	FBtr0301161	0.147333	-1.10489	0.031004	-1.16378	0.343588	0.0771296
3306	18146949	FBtr0290035 // cg // combgap // 50E1-50E1|2-71.1 cM // 36571 /// FBtr0112795 // cg // c	cg	FBtr0290035	0.0701964	-1.04825	2.06e-07	-1.18132	0.206925	5.41438e-06
6193	18163907	FBtr0333065 // jeb // jelly belly // 48E1-48E2 // 36295 /// FBtr0088021 // jeb // jelly	jeb	FBtr0333065	0.0527616	-1.11835	0.393462	-1.04924	0.1702	0.544845
15839	18218600	NR_037724 // CR42767 // ncRNA // 8E7-8E7 // 10178874	CR42767	NR_037724	0.522522	-1.12278	0.375074	1.17485	0.738024	0.52662
10736	18189381	FBtr0085821 // kek6 // CG1804 gene product from transcript CG1804-RA // 100D1-100D1 //	kek6	FBtr0085821	0.392354	-1.06149	0.0938827	-1.12624	0.627079	0.185201
3368	18147449	NM_166322 // 5-HT1A // Serotonin receptor 1A // 56B2-56B5 // 37196 /// FBtr0086577 // 5	5-HT1A	NM_166322	0.0978726	-1.11989	0.527197	-1.04334	0.261912	0.666887
11867	18196143	FBtr0300335 // CG8861 // CG8861 gene product from transcript CG8861-RB // 85D8-85D11 //	CG8861	FBtr0300335	0.379603	1.05835	0.783905	-1.01775	0.614732	0.861392
15269	18215543	FBtr0073978 // CG9509 // CG9509 gene product from transcript CG9509-RA // 13A1-13A1 //	CG9509	FBtr0073978	0.581629	-1.08111	0.0746177	-1.29485	0.778818	0.154734
3869	18150553	FBtr0087633 // CG6329 // CG6329 gene product from transcript CG6329-RA // 50C6-50C6 //	CG6329	FBtr0087633	0.194598	-1.07324	0.00272351	-1.18966	0.41073	0.0108422
12284	18198574	FBtr0084036 // RhoGAP93B // CG3421 gene product from transcript CG3421-RA // 93B10-93B1	RhoGAP93B	FBtr0084036	0.0473369	1.09931	0.403531	1.03959	0.157199	0.555489
6020	18162910	FBtr0088726 // CG30355 // CG30355 gene product from transcript CG30355-RA // 44E2-44E2	CG30355	FBtr0088726	0.333703	-1.195	0.0530951	1.44025	0.569084	0.118181
7997	18174341	NM_168056 // Gad1 // Glutamic acid decarboxylase 1 // 64A5-64A5 // 38484 /// FBtr007327	Gad1	NM_168056	0.0378402	-1.1276	0.00147979	-1.21298	0.135742	0.00664095
14378	18210303	FBtr0332934 // CG43902 // CG43902 gene product from transcript CG43902-RA // 9B2-9B3 //	CG43902	FBtr0332934	0.000283004	-1.29053	1.53e-06	-1.44651	0.00320777	2.74727e-05
8786	18178649	FBtr0332863 // Cyp312a1 // CG5137 gene product from transcript CG5137-RB // 75B11-75B11	Cyp312a1	FBtr0332863	0.275458	1.16412	0.0335782	1.35582	0.507166	0.0822668
388	18131026	NM_057308 // ninaA // neither inactivation nor afterpotential A // 21E2-21E2|2-1.4 cM /	ninaA	NM_057308	0.819187	1.01576	9.89e-05	-1.35366	0.916039	0.000771997
1300	18136207	FBtr0077921 // robo3 // CG5423 gene product from transcript CG5423-RB // 21F3-21F4 // 3	robo3	FBtr0077921	2.87e-05	-1.39685	0.00196528	-1.25951	0.000506423	0.00833393
13320	18204614	FBtr0089102 // CG9935 // CG9935 gene product from transcript CG9935-RB // 102D1-102D1 /	CG9935	FBtr0089102	0.0304389	-1.16341	3e-06	-1.46149	0.116135	4.70827e-05
9432	18181972	FBtr0330351 // bru-3 // bruno-3 // 70C1-70C2 // 39527 /// NM_001202166 // bru-3 // brun	bru-3	FBtr0330351	0.0362726	-1.12707	0.000898474	-1.2223	0.131653	0.00446692
6507	18165716	FBtr0078306 // Eip78C // Ecdysone-induced protein 78C // 78C2-78C3 // 40345 /// NM_0794	Eip78C	FBtr0078306	0.828257	1.01309	0.00267877	-1.21417	0.920649	0.0107007
10529	18188261	FBtr0084805 // CG13654 // CG13654 gene product from transcript CG13654-RA // 96C4-96C5	CG13654	FBtr0084805	0.00568309	1.14984	0.00646046	1.14709	0.0333307	0.0218771
14704	18212415	FBtr0073992 // rut // rutabaga // 12F4-12F5 // 32406 /// NM_078601 // rut // rutabaga /	rut	FBtr0073992	0.000644087	1.17186	0.916359	1.00443	0.00607325	0.948386
2781	18144345	FBtr0333008 // CG15357 // CG15357 gene product from transcript CG15357-RB // 22B6-22B6	CG15357	FBtr0333008	0.00624259	1.35965	2.91e-10	2.59264	0.0359533	2.35134e-08
15799	18218244	FBtr0299862 // CG42339 // CG42339 gene product from transcript CG42339-RB // 10A3-10A3	CG42339	FBtr0299862	0.0475931	1.15204	0.146913	1.10747	0.157665	0.262239
5067	18157354	FBtr0087254 // Ric // Ras which interacts with Calmodulin // 52E5-52E5 // 36776 /// NM_	Ric	FBtr0087254	0.0249246	-1.08673	0.00113632	-1.13491	0.100226	0.00537751
11012	18190900	FBtr0112469 // CG34274 // CG34274 gene product from transcript CG34274-RA // 89A2-89A2	CG34274	FBtr0112469	0.0435358	1.29889	1.13e-08	2.60013	0.149159	4.80309e-07
9928	18185055	FBtr0081789 // CG7918 // CG7918 gene product from transcript CG7918-RA // 84E10-84E10 /	CG7918	FBtr0081789	0.23098	1.0941	0.0974767	-1.13403	0.455338	0.190952
11478	18193903	NM_169059 // Nmdar1 // NMDA receptor 1 // 83A6-83A7 // 40665 /// FBtr0078763 // Nmdar1	Nmdar1	NM_169059	0.0832704	-1.11917	0.00743515	-1.19744	0.233409	0.0245611
4067	18151694	FBtr0300829 // CG16716 // CG16716 gene product from transcript CG16716-RC // 56E1-56E1	CG16716	FBtr0300829	0.123037	-1.21832	0.0141723	1.38235	0.30409	0.0414439
15275	18215562	FBtr0073970 // hiw // highwire // 13A5-13A8 // 32429 /// NM_078604 // hiw // highwire /	hiw	FBtr0073970	0.710765	-1.02274	3.53e-06	-1.40245	0.858687	5.32501e-05
6052	18163063	FBtr0300955 // CG30416 // CG30416 gene product from transcript CG30416-RB // 59D6-59D6	CG30416	FBtr0300955	0.46147	-1.12252	0.0125295	1.50813	0.68738	0.0376138
9888	18184846	FBtr0081710 // CG10298 // CG10298 gene product from transcript CG10298-RA // 83E4-83E4	CG10298	FBtr0081710	0.939345	-1.01276	0.00205743	1.74374	0.974006	0.00863496
14184	18209224	FBtr0074130 // CG8924 // CG8924 gene product from transcript CG8924-RB // 14A1-14A1 //	CG8924	FBtr0074130	0.815084	-1.01304	0.000161699	-1.26578	0.914672	0.0011444
12279	18198559	FBtr0083986 // CG10830 // CG10830 gene product from transcript CG10830-RA // 93A2-93A2	CG10830	FBtr0083986	0.000460819	-1.26775	9.55e-05	-1.31157	0.00465151	0.000750482
9422	18181919	NM_001274926 // CG43679 // CG43679 gene product from transcript CG43679-RA // 71B2-71B2	CG43679	NM_001274926	0.0741163	1.2801	0.498806	-1.09575	0.215142	0.642827
1626	18137692	FBtr0080888 // Cyt-c-d // Cytochrome c distal // 36A11-36A11 // 34995 /// FBtr0080888 /	Cyt-c-d	FBtr0080888	0.62931	-1.06891	0.00220161	1.57825	0.810446	0.00913903
9281	18181091	FBtr0072962 // CG32295 // CG32295 gene product from transcript CG32295-RA // 62E5-62E5	CG32295	FBtr0072962	0.249769	-1.10151	2.23e-05	1.50851	0.478975	0.000231687
805	18133571	FBtr0077506 // CG15423 // CG15423 gene product from transcript CG15423-RA // 24D3-24D3	CG15423	FBtr0077506	0.496676	1.10343	0.405139	-1.12837	0.717828	0.556951
2203	18141123	FBtr0077997 // CG4375 // CG4375 gene product from transcript CG4375-RA // 21E3-21E3 //	CG4375	FBtr0077997	3.95e-13	-4.15804	8.61e-09	-2.53407	1.00737e-10	3.87142e-07
9519	18182494	NM_080160 // Mst98Ca // Male-specific RNA 98Ca // 98C3-98C3 // 47854 /// FBtr0085277 //	Mst98Ca	NM_080160	0.993576	1.00172	0.223393	1.3016	0.996935	0.360979
1825	18138712	NM_164852 // Ggamma30A // G protein gamma30A // 30A6-30A8 // 45234 /// NM_080068 // Gga	Ggamma30A	NM_164852	9.98e-06	-1.14647	2.56e-07	-1.1854	0.000214548	6.49834e-06
606	18132481	FBtr0080755 // CG18480 // CG18480 gene product from transcript CG18480-RA // 35D3-35D3	CG18480	FBtr0080755	0.668912	-1.05436	0.352059	-1.12282	0.835955	0.503311
9618	18183197	NM_080511 // Dms // Dromyosuppressin // 95F14-95F14 // 44324 /// FBtr0084607 // Dms //	Dms	NM_080511	0.560025	1.02924	0.353725	-1.04713	0.764211	0.504986
4986	18156749	FBtr0088160 // epsilonTry // epsilonTrypsin // 47F4-47F4 // 49080 /// NM_080373 // epsi	epsilonTry	FBtr0088160	0.119637	-1.30334	0.627698	1.08446	0.299083	0.748924
10018	18185514	FBtr0082142 // CG8526 // CG8526 gene product from transcript CG8526-RA // 85E9-85E9 //	CG8526	FBtr0082142	0.929033	1.01041	6.46e-06	1.86869	0.96878	8.59333e-05
795	18133498	FBtr0333251 // CG8851 // CG8851 gene product from transcript CG8851-RC // 23F6-23F6 //	CG8851	FBtr0333251	1.12e-06	1.93621	2.53e-11	3.02345	3.39158e-05	3.38481e-09
2523	18143000	FBtr0113033 // CG5375 // CG5375 gene product from transcript CG5375-RB // 31D8-31D9 //	CG5375	FBtr0113033	0.558944	-1.04055	0.000168591	-1.33336	0.763502	0.00118202
4833	18155715	FBtr0306907 // CG43324 // CG43324 gene product from transcript CG43324-RA // 54C8-54C8	CG43324	FBtr0306907	0.388677	1.0546	0.0518009	-1.13087	0.623488	0.115932
4089	18151798	FBtr0086288 // CG13870 // CG13870 gene product from transcript CG13870-RA // 56F17-56F1	CG13870	FBtr0086288	0.739046	-1.0357	0.000144579	1.57148	0.875925	0.00104834
11873	18196176	FBtr0082045 // Task7 // CG9361 gene product from transcript CG9361-RA // 85D15-85D15 //	Task7	FBtr0082045	0.958338	-1.00359	0.969781	1.00261	0.982172	0.981264
12803	18201381	FBtr0083984 // CG31191 // CG31191 gene product from transcript CG31191-RA // 93A3-93A4	CG31191	FBtr0083984	0.697095	1.02846	0.0183032	-1.1947	0.852402	0.050798
10878	18190230	FBtr0081682 // CG31286 // CG31286 gene product from transcript CG31286-RB // 84A1-84A1	CG31286	FBtr0081682	0.91301	1.01525	0.00370805	1.53939	0.960658	0.0139293
7024	18168883	FBtr0076174 // CG7557 // CG7557 gene product from transcript CG7557-RA // 68C9-68C9 //	CG7557	FBtr0076174	0.167649	1.2612	0.000194735	2.00157	0.371947	0.00132602
11158	18191920	FBtr0089771 // tinc // tincar // 90C7-90C8 // 42148 /// NM_176509 // tinc // tincar //	tinc	FBtr0089771	0.0768017	-1.11288	0.0132328	-1.16597	0.220231	0.039263
15532	18216945	NM_080309 // mRpL14 // mitochondrial ribosomal protein L14 // 3A1-3A1 // 31222 /// FBtr	mRpL14	NM_080309	8.57e-22	-3.61552	2.89e-22	-3.79391	2.33133e-18	1.17926e-18
7552	18171535	NM_168282 // S-Lap2 // Sperm-Leucylaminopeptidase 2 // 66D8-66D8 // 326209 /// FBtr0076	S-Lap2	NM_168282	0.978964	1.0052	0.0149995	1.65277	0.991539	0.0433543
11035	18191027	FBtr0301397 // CG34362 // CG34362 gene product from transcript CG34362-RD // 98B8-98C1	CG34362	FBtr0301397	0.42723	-1.04674	1.25e-05	-1.34264	0.657668	0.000146045
13317	18204582	FBtr0300344 // Asator // CG11533 gene product from transcript CG11533-RI // 102C1-102C1	Asator	FBtr0300344	2.86e-05	-1.24213	5.45e-07	-1.32071	0.000505205	1.20535e-05
2146	18140830	FBtr0080579 // CG9014 // CG9014 gene product from transcript CG9014-RA // 34D1-34D1 //	CG9014	FBtr0080579	0.526697	-1.07995	0.00102581	1.54552	0.74155	0.00495656
4548	18154178	FBtr0100053 // CG33998 // CG33998 gene product from transcript CG33998-RA // 55E11-55E1	CG33998	FBtr0100053	0.798564	-1.01658	0.380368	-1.0585	0.906787	0.531538
15607	18217329	FBtr0331748 // Sclp // CG2471 gene product from transcript CG2471-RC // 10F7-10F7 // 32	Sclp	FBtr0331748	0.961545	1.0065	0.000538491	1.67268	0.983472	0.00295338
7282	18170130	FBtr0074900 // CG7646 // CG7646 gene product from transcript CG7646-RB // 76D8-76D8 //	CG7646	FBtr0074900	0.026639	-1.13629	2.04e-06	-1.37657	0.10533	3.44332e-05
10696	18189159	FBtr0085568 // CG15530 // CG15530 gene product from transcript CG15530-RB // 99E1-99E1	CG15530	FBtr0085568	0.841722	-1.03261	0.000610571	1.83647	0.927093	0.00326638
7680	18172087	FBtr0331577 // CG34356 // CG34356 gene product from transcript CG34356-RF // 67D2-67D2	CG34356	FBtr0331577	0.0416894	-1.1654	0.000741934	-1.30952	0.144808	0.00383223
11101	18191500	FBtr0305614 // CG42404 // CG42404 gene product from transcript CG42404-RE // 88E5-88E6	CG42404	FBtr0305614	0.0178647	1.19659	0.233452	-1.09111	0.0787011	0.372619
11953	18196697	FBtr0082460 // CG6790 // CG6790 gene product from transcript CG6790-RA // 86E11-86E11 /	CG6790	FBtr0082460	0.913534	1.0163	0.000950564	1.7151	0.960803	0.0046662
15338	18215917	FBtr0074362 // CG9673 // CG9673 gene product from transcript CG9673-RA // 15A2-15A3 //	CG9673	FBtr0074362	0.109874	1.27288	0.644064	-1.07079	0.282508	0.761162
13031	18202680	FBtr0300198 // CG42446 // CG42446 gene product from transcript CG42446-RA // 89B13-89B1	CG42446	FBtr0300198	0.24356	-1.23489	0.115593	1.33287	0.471576	0.218445
3644	18149276	FBtr0089045 // CG11060 // CG11060 gene product from transcript CG11060-RA // 42F3-42F3	CG11060	FBtr0089045	0.314068	-1.10574	3.84e-06	1.73341	0.549375	5.68752e-05
6003	18162846	FBtr0071780 // CG30278 // CG30278 gene product from transcript CG30278-RA // 58D2-58D2	CG30278	FBtr0071780	6.8e-05	-2.21545	0.595568	-1.09725	0.00100991	0.723117
6666	18166735	FBtr0072695 // robl62A // CG1014 gene product from transcript CG1014-RA // 62A2-62A2 //	robl62A	FBtr0072695	0.338355	-1.15471	0.10479	1.2804	0.573839	0.201929
1912	18139278	NM_057296 // Acp26Aa // Accessory gland-specific peptide 26Aa // 26A1-26A1 // 33817 ///	Acp26Aa	NM_057296	0.204736	-1.19851	0.00307808	1.56644	0.423578	0.0119578
4923	18156285	FBtr0089931 // ltd // lightoid // 45B2-45B3 // 35940 /// NM_080370 // ltd // lightoid /	ltd	FBtr0089931	0.0015373	1.18092	0.0120464	-1.1362	0.0120172	0.0364586
12901	18201893	FBtr0085348 // CG33203 // CG33203 gene product from transcript CG33203-RE // 98F1-98F1	CG33203	FBtr0085348	0.834973	-1.01336	0.257966	-1.0755	0.924087	0.401078
6911	18168289	FBtr0331171 // CG13685 // CG13685 gene product from transcript CG13685-RC // 66A11-66A1	CG13685	FBtr0331171	0.0183189	-1.17761	0.000250724	-1.31184	0.0802472	0.00161496
12459	18199559	FBtr0300730 // Npl4 // Npl4 ortholog // 96E4-96E6 // 43091 /// FBtr0084892 // Npl4 // N	Npl4	FBtr0300730	3.21e-12	-1.73908	1.97e-13	-1.85452	6.38947e-10	5.44989e-11
15651	18217565	FBtr0070053 // CG32820 // CG32820 gene product from transcript CG32820-RA // 20A4-20A4	CG32820	FBtr0070053	0.233678	-1.11694	0.00135533	1.37791	0.459142	0.00618917
15652	18217572	FBtr0070053 // CG32820 // CG32820 gene product from transcript CG32820-RA // 20A4-20A4	CG32820	FBtr0070053	0.233678	-1.11694	0.00135533	1.37791	0.459142	0.00618917
4970	18156662	NM_176240 // hbn // homeobrain // 57B5-57B5 // 47894 /// FBtr0071556 // hbn // homeobra	hbn	NM_176240	0.408748	-1.06467	0.316696	1.07913	0.641375	0.465476
7551	18171523	FBtr0331863 // CG32333 // CG32333 gene product from transcript CG32333-RC // 61F4-61F5	CG32333	FBtr0331863	0.150843	-1.1037	0.00361932	-1.23477	0.348142	0.0136675
5880	18162192	FBtr0072335 // CG4781 // CG4781 gene product from transcript CG4781-RA // 60D10-60D10 /	CG4781	FBtr0072335	0.226602	1.2019	0.37867	-1.14241	0.450335	0.530255
7920	18173704	NM_001275033 // Abl // Abl tyrosine kinase // 73B1-73B4 // 45821 /// FBtr0330133 // Abl	Abl	NM_001275033	0.665066	1.01575	0.304131	1.03807	0.834759	0.452509
8205	18175659	FBtr0072568 // CG13884 // CG13884 gene product from transcript CG13884-RA // 61C1-61C1	CG13884	FBtr0072568	0.525105	-1.09457	0.000904699	1.67531	0.740199	0.00449239
1410	18136862	FBtr0079607 // Mur29B // Mucin related 29B // 29B1-29B1 // 319014 /// NM_164808 // Mur2	Mur29B	FBtr0079607	0.4264	1.14199	0.10408	-1.31767	0.656885	0.200922
2163	18140916	FBtr0080560 // CG16886 // CG16886 gene product from transcript CG16886-RB // 34E4-34E4	CG16886	FBtr0080560	0.0270024	-1.18677	0.0982957	-1.13396	0.106425	0.192234
12816	18201456	FBtr0083772 // CG31244 // CG31244 gene product from transcript CG31244-RA // 92A3-92A3	CG31244	FBtr0083772	1.24e-05	-2.00149	0.198858	-1.19176	0.000254903	0.330997
10974	18190711	FBtr0091937 // Indy-2 // I'm not dead yet 2 // 92C3-92C4 // 3772456 /// FBtr0301700 //	Indy-2	FBtr0091937	0.864092	-1.02145	0.000313744	1.64652	0.937747	0.00192734
11117	18191615	FBtr0091937 // Indy-2 // I'm not dead yet 2 // 92C3-92C4 // 3772456 /// FBtr0301700 //	Indy-2	FBtr0091937	0.864092	-1.02145	0.000313744	1.64652	0.937747	0.00192734
1628	18137701	NM_136017 // rdo // reduced ocelli // 36E3-36E3|2-53 cM // 35077 /// FBtr0081029 // rdo	rdo	NM_136017	0.077346	-1.13522	0.00063395	-1.3019	0.221481	0.0033628
8206	18175661	FBtr0072566 // CG13891 // CG13891 gene product from transcript CG13891-RA // 61C1-61C1	CG13891	FBtr0072566	0.679747	-1.04563	0.000125456	1.59851	0.842051	0.00093374
9318	18181361	FBtr0075541 // fwe // flower // 72A1-72A1 // 39720 /// NM_168633 // fwe // flower // 72	fwe	FBtr0075541	0.670751	-1.01728	0.206812	-1.05281	0.837003	0.340822
484	18131651	FBtr0081195 // drl // derailed // 37C7-37C7 // 44355 /// FBtr0330209 // drl // derailed	drl	FBtr0081195	1.52e-06	-1.314	1.31e-08	-1.42169	4.39884e-05	5.42686e-07
10037	18185595	FBtr0082269 // CG4073 // CG4073 gene product from transcript CG4073-RA // 86C4-86C4 //	CG4073	FBtr0082269	0.82767	-1.03925	0.00622037	1.67336	0.92031	0.021227
6947	18168480	FBtr0076582 // CG13309 // CG13309 gene product from transcript CG13309-RA // 66D15-66D1	CG13309	FBtr0076582	0.0739919	1.37769	0.669867	-1.07743	0.214932	0.781714
14866	18213453	FBtr0071235 // PIP82 // CG11219 gene product from transcript CG11219-RA // 7F3-7F3 // 3	PIP82	FBtr0071235	0.677511	-1.03079	0.000359917	-1.33555	0.840554	0.00214634
11792	18195763	FBtr0081701 // sowi // solwind // 84A1-84A1 // 40809 /// NM_141414 // sowi // solwind /	sowi	FBtr0081701	0.933575	-1.01286	0.00230648	1.65696	0.970702	0.00948271
10220	18186549	FBtr0083185 // CG9632 // CG9632 gene product from transcript CG9632-RA // 89A6-89A6 //	CG9632	FBtr0083185	0.479687	1.10678	4.5e-05	1.95888	0.703961	0.000409872
2431	18142405	FBtr0079564 // CG14535 // CG14535 gene product from transcript CG14535-RA // 28D2-28D2	CG14535	FBtr0079564	0.0256075	-1.1722	0.00489516	-1.22793	0.102181	0.0175063
14821	18213117	FBtr0074405 // xmas-1 // CG32561 gene product from transcript CG32561-RA // 15E7-15E7 /	xmas-1	FBtr0074405	0.565655	1.05339	2.77e-06	1.66842	0.768308	4.43254e-05
12329	18198816	FBtr0084281 // CG5278 // CG5278 gene product from transcript CG5278-RA // 94B4-94B4 //	CG5278	FBtr0084281	0.602461	-1.04318	0.0089115	-1.25131	0.793944	0.0285203
13376	18204932	FBtr0302255 // CG40204 // CG40204 gene product from transcript CG40204-RB // --- // 335	CG40204	FBtr0302255	0.000612681	1.26784	1.24e-06	1.45249	0.00584464	2.30516e-05
8631	18177899	FBtr0075855 // CG10713 // CG10713 gene product from transcript CG10713-RA // 70B1-70B1	CG10713	FBtr0075855	0.490432	1.04162	0.313691	-1.06166	0.712491	0.462517
4160	18152190	FBtr0300682 // CG10384 // CG10384 gene product from transcript CG10384-RB // 58E2-58E2	CG10384	FBtr0300682	0.0214739	1.18521	0.209856	-1.094	0.089825	0.344153
3652	18149307	FBtr0088974 // CG11125 // CG11125 gene product from transcript CG11125-RC // 43C1-43C1	CG11125	FBtr0088974	0.613161	1.0431	4.67e-05	1.47797	0.800424	0.00042323
3143	18146305	FBtr0332576 // CG42688 // CG42688 gene product from transcript CG42688-RB // 37C6-37C7	CG42688	FBtr0332576	0.566911	1.09457	7.09e-05	2.04486	0.76897	0.000591933
15587	18217234	FBtr0302988 // CG32553 // CG32553 gene product from transcript CG32553-RA // 16F7-16F7	CG32553	FBtr0302988	5.6e-08	-1.72758	6.84e-09	-1.83396	2.68833e-06	3.16268e-07
4205	18152396	FBtr0071968 // Klp59D // CG12192 gene product from transcript CG12192-RA // 59D1-59D1 /	Klp59D	FBtr0071968	0.673065	1.06073	0.00302516	1.56094	0.838416	0.01179
1450	18137041	NM_001014474 // Ddr // Discoidin domain receptor // 26C1-26C2 // 3346209 /// FBtr009149	Ddr	NM_001014474	0.00175544	-1.26328	9.01e-05	-1.35933	0.0132813	0.000714236
13181	18203550	FBtr0309077 // CG43441 // CG43441 gene product from transcript CG43441-RA // 85E2-85E2	CG43441	FBtr0309077	0.199575	-1.15771	1.05e-05	1.79792	0.416769	0.000126667
15252	18215464	FBtr0299543 // CG13404 // CG13404 gene product from transcript CG13404-RB // 12E6-12E6	CG13404	FBtr0299543	0.143609	1.08478	0.754206	-1.01728	0.337742	0.8408
12198	18198084	FBtr0302308 // CG15803 // CG15803 gene product from transcript CG15803-RB // 91A3-91A3	CG15803	FBtr0302308	0.00150177	-1.20739	4.08e-06	-1.35248	0.0117959	5.96718e-05
6025	18162941	FBtr0088770 // cola // comas sola // 44C4-44C4 // 246566 /// FBtr0113373 // swif // swi	cola	FBtr0088770	0.0338114	-1.31368	0.0125412	1.38492	0.12497	0.0376282
6028	18162948	FBtr0088770 // cola // comas sola // 44C4-44C4 // 246566 /// FBtr0113373 // swif // swi	cola	FBtr0088770	0.0338114	-1.31368	0.0125412	1.38492	0.12497	0.0376282
10395	18187477	FBtr0084149 // CG6690 // CG6690 gene product from transcript CG6690-RA // 93F14-93F14 /	CG6690	FBtr0084149	0.00016917	-1.91016	0.149459	-1.25079	0.00211262	0.265882
11802	18195815	FBtr0081601 // CG14605 // CG14605 gene product from transcript CG14605-RE // 84D2-84D2	CG14605	FBtr0081601	0.561715	-1.08876	0.00210271	1.62665	0.765294	0.0087956
6547	18166007	FBtr0111143 // Snap25 // Synapse protein 25 // --- // 3355084 /// NM_001043176 // Snap2	Snap25	FBtr0111143	0.0998985	-1.09705	4.36e-05	-1.29633	0.265302	0.000399349
12615	18200345	FBtr0113310 // CG15537 // CG15537 gene product from transcript CG15537-RB // 99F4-99F4	CG15537	FBtr0113310	0.421518	-1.05672	0.00134088	-1.2696	0.652444	0.0061409
7225	18169846	FBtr0075141 // CG7441 // CG7441 gene product from transcript CG7441-RA // 75A4-75A4 //	CG7441	FBtr0075141	0.932738	-1.00564	4.14e-06	1.44592	0.970433	6.02256e-05
5349	18159369	FBtr0088440 // CG1418 // CG1418 gene product from transcript CG1418-RA // 46C7-46C8 //	CG1418	FBtr0088440	0.519543	1.03433	7.58e-07	1.37663	0.735973	1.56411e-05
13849	18207540	FBtr0070717 // CG12681 // CG12681 gene product from transcript CG12681-RA // 4D3-4D3 //	CG12681	FBtr0070717	0.00480679	-1.31277	0.0231876	1.23862	0.0293295	0.0611913
4878	18156004	FBtr0290009 // Sema-2b // Semaphorin-2b // 53C4-53C4 // 246538 /// FBtr0329992 // Sema-	Sema-2b	FBtr0290009	0.552414	1.03671	0.046844	-1.13231	0.760385	0.107145
5493	18160165	FBtr0087608 // CG18568 // CG18568 gene product from transcript CG18568-RA // 50C21-50C2	CG18568	FBtr0087608	0.668248	-1.06373	0.008814	1.4906	0.835696	0.0282859
6647	18166626	FBtr0073157 // Fie // Fire exit // 63F5-63F5 // 38452 /// NM_133165 // Fie // Fire exit	Fie	FBtr0073157	0.0156462	-1.11942	0.000103218	-1.21686	0.0713544	0.000796937
14074	18208675	FBtr0073652 // CG2556 // CG2556 gene product from transcript CG2556-RA // 11A12-11A12 /	CG2556	FBtr0073652	0.0282368	-1.18148	2.1e-05	-1.4375	0.110106	0.000220426
743	18133209	NM_001032399 // eys // eyes shut // 22E1-22E1 // 3771890 /// FBtr0114370 // eys // eyes	eys	NM_001032399	0.449042	-1.06181	0.000303965	-1.37448	0.677946	0.00188285
10206	18186492	FBtr0083148 // CG5213 // CG5213 gene product from transcript CG5213-RA // 88F6-88F6 //	CG5213	FBtr0083148	0.550443	1.09886	0.000252687	1.90656	0.758401	0.00162372
10015	18185493	FBtr0082139 // CG8500 // CG8500 gene product from transcript CG8500-RA // 85E9-85E9 //	CG8500	FBtr0082139	0.0103228	-1.16095	3.95e-05	-1.29902	0.052466	0.000369044
9906	18184938	FBtr0081567 // Fer1 // 48 related 1 // 84C5-84C6 // 2768661 /// NM_206455 // Fer1 // 48	Fer1	FBtr0081567	0.855066	1.01217	0.0167475	-1.18071	0.933245	0.047383
15479	18216651	FBtr0300353 // CG15446 // CG15446 gene product from transcript CG15446-RC // 19F1-19F1	CG15446	FBtr0300353	0.906422	-1.01548	0.000941436	1.60593	0.957581	0.00463406
9213	18180730	FBtr0300031 // CG34342 // CG34342 gene product from transcript CG34342-RC // 64D2-64D2	CG34342	FBtr0300031	0.213749	-1.08726	0.0306984	-1.16095	0.434472	0.0765443
15685	18217761	FBtr0302418 // CG33668 // CG33668 gene product from transcript CG33668-RB // 6A1-6A1 //	CG33668	FBtr0302418	0.792846	1.02429	1.51e-05	1.59043	0.904045	0.00016939
15933	18219193	NR_047706 // CR43480 // ncRNA // --- // 12798148 /// NR_047707 // CR43480 // ncRNA // -	CR43480	NR_047706	0.944802	1.00521	2.2e-07	-1.63599	0.976652	5.69975e-06
10784	18189666	FBtr0085011 // Hex-t2 // CG32849 gene product from transcript CG32849-RA // 97B3-97B3 /	Hex-t2	FBtr0085011	0.0140068	-1.44172	0.101761	1.2673	0.0658086	0.197285
15701	18217813	FBtr0111189 // CG40485 // CG40485 gene product from transcript CG40485-RB // 20F3-20F3	CG40485	FBtr0111189	0.45472	-1.05845	0.117148	-1.12856	0.683034	0.22077
9342	18181545	NR_048265 // mir-956 // mir-956 stem loop // 68D4-68D4 // 12798206 /// FBtr0304425 // M	mir-956	NR_048265	0.0344724	1.40058	0.0363959	1.39532	0.126925	0.0876574
13137	18203287	NM_001104256 // FoxP // Forkhead box P // 85E5-85E5 // 41182 /// FBtr0329937 // FoxP //	FoxP	NM_001104256	0.000252408	-1.39117	4.29e-08	-1.77719	0.00294693	1.45273e-06
6843	18167848	NM_168102 // Gef64C // Guanine nucleotide exchange factor GEF64C // 64B13-64B17 // 3857	Gef64C	NM_168102	0.264217	1.05244	0.203232	1.06017	0.494218	0.336596
12983	18202320	FBtr0303867 // CG34357 // CG34357 gene product from transcript CG34357-RD // 82C1-82C2	CG34357	FBtr0303867	0.0150233	-1.21439	2.91e-05	-1.44658	0.0694198	0.000288035
15643	18217527	FBtr0333795 // CG32791 // CG32791 gene product from transcript CG32791-RC // 3D4-3D6 //	CG32791	FBtr0333795	0.00163207	-1.2483	0.000527982	-1.28209	0.0125892	0.00290648
1605	18137535	FBtr0112561 // CG34351 // CG34351 gene product from transcript CG34351-RC // 25A3-25A3	CG34351	FBtr0112561	5e-05	1.32338	0.000503813	1.26027	0.000790795	0.00280561
11389	18193379	NM_079687 // Rh3 // Rhodopsin 3 // 92C5-92C5 // 42398 /// FBtr0083876 // Rh3 // Rhodops	Rh3	NM_079687	0.00445127	-1.1393	4.63e-08	-1.35641	0.0276881	1.54858e-06
9900	18184905	FBtr0081631 // djl // don juan like // 84B2-84B2 // 40839 /// NM_141429 // djl // don j	djl	FBtr0081631	0.346183	-1.14511	0.000400575	1.75399	0.581065	0.00233215
11225	18192282	FBtr0333726 // Fas1 // Fasciclin 1 // 89D5-89D6 // 42025 /// NM_001275716 // Fas1 // Fa	Fas1	FBtr0333726	0.502215	-1.01948	0.520025	-1.01866	0.72228	0.66079
13063	18202901	NM_001104355 // Dscam3 // Down syndrome cell adhesion molecule 3 // 90B1-90B1 // 42103	Dscam3	NM_001104355	0.794866	-1.01873	0.228509	-1.0908	0.904918	0.366846
12373	18199081	FBtr0084475 // CG10252 // CG10252 gene product from transcript CG10252-RA // 95A7-95A7	CG10252	FBtr0084475	0.895274	-1.02074	0.00498145	1.59641	0.952958	0.017741
6195	18163915	FBtr0301639 // stmA // stambha A // 44E3-44E3|2-56.8 cM // 35865 /// NM_001014513 // st	stmA	FBtr0301639	0.0149748	1.09885	0.507366	-1.02484	0.0692993	0.649544
6528	18165923	FBtr0089585 // TpnC73F // Troponin C at 73F // 73E5-73E5 // 39916 /// NM_079398 // TpnC	TpnC73F	FBtr0089585	0.256346	-1.07747	0.148023	1.10045	0.486351	0.26373
4885	18156040	FBtr0331989 // CG43795 // CG43795 gene product from transcript CG43795-RA // 59E2-59E2	CG43795	FBtr0331989	0.543147	-1.04455	0.0285088	-1.17687	0.752951	0.0720757
15195	18215182	FBtr0073590 // CG10362 // CG10362 gene product from transcript CG10362-RA // 10F7-10F7	CG10362	FBtr0073590	0.0922757	-1.13088	0.0687193	-1.14285	0.251104	0.144676
15812	18218351	NM_001258518 // elav // embryonic lethal abnormal vision // 1B7-1B8 // 31000 /// FBtr03	elav	NM_001258518	0.0117106	-1.12795	0.000668515	-1.18523	0.0576419	0.00351757
6710	18167023	FBtr0300345 // CG12502 // CG12502 gene product from transcript CG12502-RB // 61D2-61D2	CG12502	FBtr0300345	0.488364	-1.05333	0.316335	-1.07838	0.710567	0.465155
9761	18184106	FBtr0084832 // rha // CG11908 gene product from transcript CG11908-RA // 96D2-96D2 // 4	rha	FBtr0084832	0.414895	-1.10403	3.64e-05	1.78022	0.646339	0.000346224
2126	18140691	FBtr0080714 // ZnT35C // CG3994 gene product from transcript CG3994-RA // 35C4-35C5 //	ZnT35C	FBtr0080714	0.258859	1.11935	0.164812	1.14965	0.489018	0.28704
11599	18194760	FBtr0085048 // amon // amontillado // 97C4-97C5 // 43215 /// NM_057970 // amon // amont	amon	FBtr0085048	0.165279	-1.10277	0.00169416	-1.26698	0.368435	0.00737979
9297	18181204	FBtr0299849 // Sytbeta // Synaptotagmin beta // 71B2-71B2 // 39630 /// FBtr0299848 // S	Sytbeta	FBtr0299849	0.585018	-1.03498	0.0268945	-1.15575	0.781269	0.0689774
643	18132693	FBtr0080821 // CG31819 // CG31819 gene product from transcript CG31819-RA // 35F1-35F1	CG31819	FBtr0080821	0.945504	-1.0111	0.00286064	1.68004	0.977084	0.0112645
11205	18192146	NR_048478 // mir-1017 // mir-1017 stem loop // 96A3-96A3 // 12798527 /// FBtr0304259 //	mir-1017	NR_048478	0.543477	-1.04551	0.223395	-1.09418	0.753144	0.360979
3096	18146038	FBtr0299967 // CG42368 // CG42368 gene product from transcript CG42368-RA // 26C4-26D1	CG42368	FBtr0299967	0.720806	-1.02183	0.092681	-1.10949	0.864507	0.183318
2162	18140911	FBtr0306681 // CG7653 // CG7653 gene product from transcript CG7653-RB // 35D5-35D5 //	CG7653	FBtr0306681	0.754654	-1.03667	0.00137224	1.49422	0.88465	0.00624413
15514	18216842	FBtr0070187 // CG3703 // CG3703 gene product from transcript CG3703-RA // 1D2-1D2 // 31	CG3703	FBtr0070187	0.0221059	-1.15977	0.000376637	-1.27812	0.0919502	0.00222654
1800	18138591	NR_048023 // mir-4973 // mir-4973 stem loop // 38C10-38C10 // 12798027 /// FBtr0309623	mir-4973	NR_048023	0.166179	-1.08867	0.000479063	-1.26341	0.36956	0.00269351
8552	18177492	FBtr0076178 // CG12289 // CG12289 gene product from transcript CG12289-RA // 68C9-68C9	CG12289	FBtr0076178	0.0136921	1.46163	5.61e-08	2.80395	0.0647963	1.82403e-06
4751	18155175	FBtr0304694 // stj // straightjacket // 50C5-50C6 // 36526 /// NM_001259374 // stj // s	stj	FBtr0304694	0.713578	1.02587	0.0562507	-1.14656	0.860321	0.123903
5882	18162207	NM_079129 // ST6Gal // Sialyltransferase // 60D14-60D14 // 37950 /// FBtr0072441 // ST6	ST6Gal	NM_079129	0.342697	1.06303	0.000377008	-1.28787	0.577781	0.00222712
12665	18200555	FBtr0300915 // salt // salty dog // 100D2-100D2 // 43742 /// NM_143632 // salt // salty	salt	FBtr0300915	0.339889	-1.19429	0.951155	-1.01138	0.575365	0.96957
2234	18141280	FBtr0077801 // CG17237 // CG17237 gene product from transcript CG17237-RA // 22D6-22D6	CG17237	FBtr0077801	0.590127	-1.06943	8.01e-05	1.75034	0.785072	0.00065012
2769	18144289	FBtr0085943 // CG10834 // CG10834 gene product from transcript CG10834-RA // 40E3-40E3	CG10834	FBtr0085943	0.972928	-1.00456	6.13e-05	1.85107	0.988636	0.000527432
14203	18209354	FBtr0300033 // CG4678 // CG4678 gene product from transcript CG4678-RE // 15A1-15A3 //	CG4678	FBtr0300033	0.286909	1.07455	0.622747	1.03352	0.518539	0.745798
15421	18216341	FBtr0308082 // CG7990 // CG7990 gene product from transcript CG7990-RA // 18A7-18B1 //	CG7990	FBtr0308082	0.847212	-1.00981	0.458117	-1.03848	0.928957	0.60698
10418	18187606	FBtr0084258 // CG7045 // CG7045 gene product from transcript CG7045-RA // 94B1-94B1 //	CG7045	FBtr0084258	0.919137	1.02107	0.0378607	1.55562	0.963307	0.0903718
9080	18180131	FBtr0299807 // CG32298 // CG32298 gene product from transcript CG32298-RB // 62E1-62E1	CG32298	FBtr0299807	0.0995908	-1.29849	0.195145	1.22596	0.264872	0.326348
9168	18180560	FBtr0100067 // CG34012 // CG34012 gene product from transcript CG34012-RA // 68A7-68A7	CG34012	FBtr0100067	0.0807925	1.36441	8.55e-05	2.17586	0.228345	0.000683414
12987	18202361	FBtr0112726 // CG34425 // CG34425 gene product from transcript CG34425-RA // 82C1-82C1	CG34425	FBtr0112726	0.268695	1.09347	3.44e-09	1.90706	0.500125	1.79386e-07
10834	18189951	FBtr0084825 // CG31104 // CG31104 gene product from transcript CG31104-RA // 96C9-96C9	CG31104	FBtr0084825	0.0221695	-1.36299	0.41721	-1.11153	0.0921677	0.569135
11154	18191899	FBtr0302858 // CG42686 // CG42686 gene product from transcript CG42686-RB // 94B11-94B1	CG42686	FBtr0302858	0.000580238	1.27175	0.0674766	-1.1262	0.00558082	0.142734
6178	18163801	FBtr0332252 // CG34370 // CG34370 gene product from transcript CG34370-RG // 58B1-58B1	CG34370	FBtr0332252	0.219639	-1.08857	0.126538	-1.11222	0.441931	0.23414
4889	18156064	NM_079120 // mAcR-60C // muscarinic Acetylcholine Receptor 60C // 60C7-60C7 // 37892 //	mAcR-60C	NM_079120	0.114502	-1.12307	0.0115533	-1.2115	0.290744	0.0352275
13267	18204133	FBtr0089195 // CG11155 // CG11155 gene product from transcript CG11155-RD // 102F8-102F	CG11155	FBtr0089195	0.000766117	-1.20507	4.68e-08	-1.43084	0.00695471	1.55892e-06
13461	18205148	FBtr0302253 // CG41518 // CG41518 gene product from transcript CG41518-RB // --- // 574	CG41518	FBtr0302253	0.67977	1.02937	0.000331844	1.3235	0.842051	0.00201515
7868	18173421	NM_001144436 // Dscam4 // Down syndrome cell adhesion molecule 4 // 66C3-66C4 // 276900	Dscam4	NM_001144436	0.0701697	1.14907	0.347674	-1.07321	0.206884	0.498746
6118	18163487	FBtr0331983 // CG33988 // CG33988 gene product from transcript CG33988-RB // 60D14-60D1	CG33988	FBtr0331983	0.57976	1.03774	0.128437	-1.10895	0.777489	0.236983
3113	18146124	FBtr0300307 // CG42471 // CG42471 gene product from transcript CG42471-RA // 33A1-33A1	CG42471	FBtr0300307	0.023009	-1.29684	0.851568	-1.02072	0.0946499	0.907739
8034	18174575	FBtr0075290 // a10 // antennal protein 10 // 73E4-73E4 // 39906 /// NM_079397 // a10 //	a10	FBtr0075290	0.0776581	1.15496	0.530045	-1.05141	0.221791	0.669688
15016	18214332	FBtr0070758 // CG3323 // CG3323 gene product from transcript CG3323-RA // 4F4-4F4 // 31	CG3323	FBtr0070758	0.928372	-1.01226	0.00148675	1.59779	0.968379	0.00667035
14356	18210222	FBtr0070198 // CG11379 // CG11379 gene product from transcript CG11379-RA // 1E3-1E3 //	CG11379	FBtr0070198	0.0814831	-1.26289	0.000348957	1.68302	0.22974	0.00209683
802	18133549	FBtr0077502 // CG3964 // CG3964 gene product from transcript CG3964-RB // 24C8-24C8 //	CG3964	FBtr0077502	0.854882	1.02446	5.93e-05	1.83779	0.933212	0.000514017
12158	18197880	FBtr0300610 // beat-IIb // CG4135 gene product from transcript CG4135-RB // 89F3-89F4 /	beat-IIb	FBtr0300610	0.646298	1.03325	0.224701	-1.09137	0.823225	0.362551
14631	18211941	NM_001272651 // CG43673 // CG43673 gene product from transcript CG43673-RA // 13E17-13E	CG43673	NM_001272651	0.00800831	1.50261	0.135126	-1.24659	0.0433107	0.245863
15867	18218701	FBtr0332620 // Evi5 // CG11727 gene product from transcript CG11727-RA // 10B11-10B14 /	Evi5	FBtr0332620	0.0301728	-1.10888	0.0323173	-1.10733	0.115362	0.0797766
788	18133470	FBtr0077588 // CG8838 // CG8838 gene product from transcript CG8838-RA // 23E5-23E5 //	CG8838	FBtr0077588	0.919001	-1.01655	0.00612776	1.6017	0.963307	0.0209812
14421	18210554	NR_002108 // CR32657 // ncRNA // 11A3-11A3 // 3772397 /// NR_073652 // CR43960 // ncRNA	CR32657	NR_002108	0.53317	-1.11318	0.0141452	1.55642	0.746118	0.0413834
8538	18177408	FBtr0076235 // CG6279 // CG6279 gene product from transcript CG6279-RA // 68A6-68A6 //	CG6279	FBtr0076235	0.719508	1.05848	0.00158814	1.72099	0.863649	0.00703818
12704	18200755	FBtr0085599 // ocn // ocnus // 99D3-99D3 // 43567 /// FBtr0085599 // ocn // ocnus // 99	ocn	FBtr0085599	0.703704	-1.09801	0.34582	1.26261	0.856289	0.497048
1813	18138632	FBtr0321306 // CG43707 // CG43707 gene product from transcript CG43707-RD // 24C3-24C3	CG43707	FBtr0321306	0.494668	-1.04948	0.0119647	-1.20514	0.716095	0.0362517
13512	18205280	FBtr0308915 // bi // bifid // 4C3-4C4 // 31379 /// NM_001258599 // bi // bifid // 4C3-4	bi	FBtr0308915	0.185189	-1.08464	0.213034	-1.07922	0.397718	0.348411
10858	18190144	FBtr0083762 // CG31221 // CG31221 gene product from transcript CG31221-RA // 92A3-92A5	CG31221	FBtr0083762	0.43332	-1.03606	0.00415133	-1.14809	0.663413	0.0153022
859	18133827	FBtr0306841 // CG11034 // CG11034 gene product from transcript CG11034-RB // 25F5-25F5	CG11034	FBtr0306841	0.65138	-1.03356	0.000147784	-1.36717	0.826319	0.00106684
12455	18199546	FBtr0084846 // alrm // astrocytic leucine-rich repeat molecule // 96D2-96D3 // 43074 //	alrm	FBtr0084846	0.000262359	-1.27973	1.59e-07	-1.49578	0.00304135	4.36168e-06
968	18134430	FBtr0079765 // CG9568 // CG9568 gene product from transcript CG9568-RA // 29F7-29F7 //	CG9568	FBtr0079765	0.019548	1.5811	0.725545	1.06812	0.0842076	0.8221
12121	18197679	FBtr0083235 // CG10185 // CG10185 gene product from transcript CG10185-RA // 89B2-89B2	CG10185	FBtr0083235	0.397733	-1.0622	0.0889613	-1.13152	0.631498	0.177271
13583	18205911	FBtr0089678 // sol // small optic lobes // 19F5-19F5 // 44014 /// FBtr0301583 // sol //	sol	FBtr0089678	0.444553	1.03357	0.00010128	-1.20923	0.674036	0.000786438
11034	18191012	FBtr0306735 // CG34355 // CG34355 gene product from transcript CG34355-RE // 95C1-95C5	CG34355	FBtr0306735	2.53e-06	-1.44711	6.05e-07	-1.49462	6.73649e-05	1.31314e-05
5631	18160888	FBtr0086811 // CG5767 // CG5767 gene product from transcript CG5767-RA // 55B1-55B2 //	CG5767	FBtr0086811	0.692438	1.06958	0.18947	-1.25362	0.849401	0.31862
12041	18197231	FBtr0301654 // Task6 // CG9637 gene product from transcript CG9637-RD // 87F7-87F7 // 4	Task6	FBtr0301654	0.0730797	-1.1417	0.00275163	-1.26161	0.212887	0.0109302
15006	18214275	FBtr0070697 // CG12684 // CG12684 gene product from transcript CG12684-RA // 4C8-4C8 //	CG12684	FBtr0070697	0.819127	1.04186	0.00604878	1.68879	0.916039	0.020798
4273	18152754	FBtr0072298 // CG13579 // CG13579 gene product from transcript CG13579-RA // 60D1-60D1	CG13579	FBtr0072298	0.702844	-1.03007	0.219388	-1.10125	0.856146	0.356091
1670	18137919	FBtr0303254 // Sytalpha // Synaptotagmin alpha // 36D-36D // 35068 /// FBtr0080987 // S	Sytalpha	FBtr0303254	0.147723	1.11063	0.879128	-1.0109	0.343858	0.924081
3670	18149448	FBtr0088853 // CG11165 // CG11165 gene product from transcript CG11165-RA // 43F6-43F6	CG11165	FBtr0088853	0.641704	1.0904	0.0102268	1.6548	0.819361	0.031904
3084	18145900	FBtr0331199 // CG42238 // CG42238 gene product from transcript CG42238-RC // 38F6-39A1	CG42238	FBtr0331199	0.0038026	-1.17262	2.19e-09	-1.52635	0.0244258	1.22836e-07
12543	18199998	FBtr0085313 // CG14061 // CG14061 gene product from transcript CG14061-RA // 98E3-98E3	CG14061	FBtr0085313	0.206717	-1.20273	0.711741	-1.05483	0.425469	0.812353
10691	18189131	FBtr0085550 // Tace // CG7908 gene product from transcript CG7908-RB // 99D1-99D1 // 43	Tace	FBtr0085550	0.505045	-1.04834	0.0369038	-1.16491	0.72453	0.0886582
14987	18214190	FBtr0331607 // CG16782 // CG16782 gene product from transcript CG16782-RB // 3D3-3D4 //	CG16782	FBtr0331607	0.746231	1.05517	0.0101733	1.56853	0.880172	0.0317614
9334	18181498	FBtr0304019 // CG42853 // CG42853 gene product from transcript CG42853-RA // 75B10-75B1	CG42853	FBtr0304019	0.0621249	-1.36816	0.027842	1.45329	0.190316	0.0707405
11813	18195865	FBtr0331692 // CG2993 // CG2993 gene product from transcript CG2993-RB // 84E1-84E1 //	CG2993	FBtr0331692	0.494561	-1.03961	0.797853	-1.01463	0.716093	0.871273
3951	18151037	FBtr0087093 // Syn2 // Syntrophin-like 2 // 53C7-53C7 // 36848 /// NM_166179 // Syn2 //	Syn2	FBtr0087093	2.09e-09	-1.68352	1.32e-10	-1.80238	1.59406e-07	1.27485e-08
1848	18138783	NM_001273515 // CG43850 // CG43850 gene product from transcript CG43850-RA // 34B11-34B	CG43850	NM_001273515	4.9e-05	-1.38123	4.07e-05	-1.38736	0.000777994	0.000377232
5270	18158891	NM_136500 // Dic3 // Dicarboxylate carrier 3 // 44A2-44A2 // 35763 /// FBtr0088870 // D	Dic3	NM_136500	0.572542	-1.08527	0.000199022	1.8313	0.772764	0.00134804
4483	18153874	NM_138130 // Atf-2 // Activating transcription factor-2 // 60E4-60E5 // 37978 /// FBtr0	Atf-2	NM_138130	0.147719	-1.08342	5.12e-05	-1.28844	0.343858	0.000456909
8135	18175194	NM_138175 // DIP2 // DISCO Interacting Protein 2 // 61B3-61B3 // 252479 /// NM_00127426	DIP2	NM_138175	0.829188	-1.00591	0.0163815	-1.07114	0.921103	0.0465961
5484	18160124	NM_137056 // S-Lap7 // Sperm-Leucylaminopeptidase 7 // 50C5-50C5 // 36524 /// FBtr00876	S-Lap7	NM_137056	0.664743	-1.05045	0.000869294	1.51364	0.834749	0.00434979
8354	18176417	FBtr0073366 // CG18418 // CG18418 gene product from transcript CG18418-RA // 64B13-64B1	CG18418	FBtr0073366	0.482529	1.09734	7.33e-05	1.81724	0.705879	0.000606388
817	18133614	FBtr0077377 // CG11929 // CG11929 gene product from transcript CG11929-RA // 25A3-25A3	CG11929	FBtr0077377	0.00085889	-1.56563	0.508234	1.08473	0.00763967	0.650415
1218	18135723	FBtr0081382 // CG17472 // CG17472 gene product from transcript CG17472-RA // 38D1-38D1	CG17472	FBtr0081382	0.000120392	-1.89771	0.000222967	-1.83818	0.00160805	0.00146863
12006	18197045	FBtr0304846 // Octbeta2R // CG33976 gene product from transcript CG33976-RD // 87C1-87C	Octbeta2R	FBtr0304846	2.85e-07	-1.33815	3.43e-09	-1.43876	1.06692e-05	1.79386e-07
12625	18200411	FBtr0085728 // CG12069 // CG12069 gene product from transcript CG12069-RA // 100A2-100A	CG12069	FBtr0085728	0.805075	-1.03681	0.000739601	1.72251	0.910783	0.00382445
624	18132595	FBtr0305567 // CG7311 // CG7311 gene product from transcript CG7311-RD // 34D1-34D1 //	CG7311	FBtr0305567	0.0520656	-1.31481	0.0298126	1.36142	0.168578	0.0747927
9608	18183151	FBtr0300320 // Os-C // CG3250 gene product from transcript CG3250-RB // 84E6-84E6 // 40	Os-C	FBtr0300320	0.112522	-1.14579	0.395999	-1.07435	0.287264	0.5478
4151	18152140	FBtr0071773 // CG11291 // CG11291 gene product from transcript CG11291-RA // 58D1-58D1	CG11291	FBtr0071773	0.000833513	-1.69182	0.469457	1.10967	0.00746685	0.617446
10932	18190484	FBtr0332159 // CG31542 // CG31542 gene product from transcript CG31542-RC // 83A1-83A1	CG31542	FBtr0332159	0.687066	-1.07701	0.0274817	1.52523	0.846181	0.0701746
11014	18190909	FBtr0332159 // CG31542 // CG31542 gene product from transcript CG31542-RC // 83A1-83A1	CG31542	FBtr0332159	0.687066	-1.07701	0.0274817	1.52523	0.846181	0.0701746
5761	18161574	FBtr0071803 // CG11475 // CG11475 gene product from transcript CG11475-RA // 58B2-58B2	CG11475	FBtr0071803	0.711013	1.03125	8.85e-09	1.89711	0.858687	3.94671e-07
2855	18144773	FBtr0079856 // CG31709 // CG31709 gene product from transcript CG31709-RA // 30B12-30B1	CG31709	FBtr0079856	0.398806	1.13331	5.86e-06	2.22029	0.632095	7.99723e-05
5177	18158186	FBtr0086721 // CG30116 // CG30116 gene product from transcript CG30116-RC // 55C10-55D1	CG30116	FBtr0086721	0.0864594	-1.10188	0.0670671	-1.10959	0.239876	0.142017
2919	18145070	FBtr0080960 // CG32832 // CG32832 gene product from transcript CG32832-RA // 36B3-36B3	CG32832	FBtr0080960	0.533543	-1.09472	0.000187425	1.83898	0.746159	0.00128428
6993	18168754	FBtr0076295 // CG8072 // CG8072 gene product from transcript CG8072-RA // 67D9-67D9 //	CG8072	FBtr0076295	2.29e-07	2.21649	1.02e-08	2.54144	8.87824e-06	4.38117e-07
14261	18209653	FBtr0310342 // CG7058 // CG7058 gene product from transcript CG7058-RC // 17E1-17E1 //	CG7058	FBtr0310342	0.0169597	-1.19887	0.00696638	-1.23091	0.0756742	0.0232907
13862	18207606	NM_131997 // SPR // Sex peptide receptor // 4F11-5A1 // 31463 /// FBtr0070778 // SPR //	SPR	NM_131997	0.000131853	-1.29285	5.31e-09	-1.5989	0.00172168	2.5718e-07
10354	18187208	FBtr0083885 // CG10881 // CG10881 gene product from transcript CG10881-RA // 92E8-92E8	CG10881	FBtr0083885	0.0397986	1.29857	8.1e-08	2.33541	0.140604	2.49449e-06
5755	18161556	FBtr0071739 // CG4377 // CG4377 gene product from transcript CG4377-RA // 58A2-58A2 //	CG4377	FBtr0071739	0.921838	-1.01228	0.221665	1.1663	0.964833	0.358823
10132	18186072	FBtr0082732 // CG8138 // CG8138 gene product from transcript CG8138-RA // 87E1-87E1 //	CG8138	FBtr0082732	0.850072	-1.03193	0.0020102	1.74413	0.930852	0.00849133
15604	18217316	FBtr0073672 // CG32651 // CG32651 gene product from transcript CG32651-RA // 11A9-11A9	CG32651	FBtr0073672	0.0819288	-1.20749	9.43e-05	1.59995	0.230718	0.000742124
11853	18196074	FBtr0308890 // CG11768 // CG11768 gene product from transcript CG11768-RC // 85A10-85B1	CG11768	FBtr0308890	0.681521	-1.02746	0.00519229	-1.21731	0.842955	0.0183876
13924	18207973	FBtr0304108 // CG14431 // CG14431 gene product from transcript CG14431-RB // 6E4-6E4 //	CG14431	FBtr0304108	0.534203	1.04545	0.0684474	1.1428	0.746704	0.144155
10807	18189803	FBtr0085784 // gskt // gasket // 100C2-100C2 // 318552 /// NM_170547 // gskt // gasket	gskt	FBtr0085784	0.254894	1.18763	0.0118676	1.48633	0.484737	0.0360177
7519	18171391	FBtr0073344 // CG32238 // CG32238 gene product from transcript CG32238-RA // 64B12-64B1	CG32238	FBtr0073344	0.733783	-1.03635	0.000102044	1.58946	0.872417	0.000790115
9468	18182215	FBtr0301120 // CG41343 // CG41343 gene product from transcript CG41343-RB // --- // 574	CG41343	FBtr0301120	0.196288	-1.11067	0.00126865	-1.32548	0.412756	0.00588097
4191	18152278	FBtr0071880 // CG13527 // CG13527 gene product from transcript CG13527-RA // 59A4-59A4	CG13527	FBtr0071880	0.0299879	-1.44295	0.0097189	1.55927	0.114889	0.030618
9057	18180021	FBtr0074914 // CG32219 // CG32219 gene product from transcript CG32219-RA // 76D6-76D6	CG32219	FBtr0074914	0.375655	1.10991	2.68e-06	1.94328	0.610967	4.32243e-05
10895	18190332	FBtr0304709 // CG31388 // CG31388 gene product from transcript CG31388-RB // 86D8-86D8	CG31388	FBtr0304709	0.667467	-1.01989	0.0138734	-1.12573	0.835408	0.0407856
7828	18173146	NM_001259961 // nrm // neuromusculin // 80C3-80C3 // 40515 /// FBtr0304833 // nrm // ne	nrm	NM_001259961	1.17e-05	-1.28958	1.02e-09	-1.52177	0.000244204	6.60652e-08
14854	18213352	FBtr0308324 // CG32809 // CG32809 gene product from transcript CG32809-RJ // 2B6-2B7 //	CG32809	FBtr0308324	0.435729	-1.04427	0.00516359	-1.17952	0.666102	0.0182939
2884	18144916	FBtr0080809 // CG31821 // CG31821 gene product from transcript CG31821-RA // 35D6-35D6	CG31821	FBtr0080809	0.919184	1.01604	0.0490226	-1.37543	0.963307	0.111116
1251	18135892	FBtr0085935 // ttm3 // tiny tim 3 // 40E2-40E2 // 35437 /// NM_136286 // ttm3 // tiny t	ttm3	FBtr0085935	0.211262	1.26389	0.000225442	2.15027	0.431675	0.00147896
8245	18175851	FBtr0072822 // CG13928 // CG13928 gene product from transcript CG13928-RA // 62A9-62A9	CG13928	FBtr0072822	0.00014427	1.23638	0.179863	1.06953	0.00184688	0.306699
14457	18210758	FBtr0302417 // CG33664 // CG33664 gene product from transcript CG33664-RB // 5F5-5F5 //	CG33664	FBtr0302417	0.760913	-1.02958	7.79e-05	1.54039	0.887978	0.000635742
2533	18143065	FBtr0080132 // w-cup // world cup // 32A1-32A1 // 34455 /// FBtr0304115 // w-cup // wor	w-cup	FBtr0080132	0.802318	-1.06446	0.555261	1.15897	0.908971	0.691724
5624	18160851	FBtr0089558 // CG14488 // CG14488 gene product from transcript CG14488-RA // 54E8-54E8	CG14488	FBtr0089558	0.348363	1.1588	0.000674987	1.79445	0.583297	0.00354363
1778	18138507	FBtr0302854 // Phae2 // Phaedra 2 // 33C4-33C4 // 34638 /// NM_135707 // Phae2 // Phaed	Phae2	FBtr0302854	0.844876	1.03015	0.0105153	-1.50685	0.928124	0.032704
11982	18196905	FBtr0082546 // CG4810 // CG4810 gene product from transcript CG4810-RA // 87B2-87B2 //	CG4810	FBtr0082546	0.915155	1.01767	0.000395294	1.91113	0.961145	0.00231006
9908	18184948	FBtr0081573 // CG14609 // CG14609 gene product from transcript CG14609-RA // 84D2-84D2	CG14609	FBtr0081573	0.929992	1.01	0.000154603	1.62205	0.96912	0.00110338
12221	18198214	FBtr0083722 // CG12269 // CG12269 gene product from transcript CG12269-RA // 91E1-91E1	CG12269	FBtr0083722	4.25e-14	-2.64212	1.88e-16	-3.27697	1.54152e-11	1.39479e-13
13180	18203548	NR_048529 // CR43436 // ncRNA // 100D2-100D2 // 12798061	CR43436	NR_048529	0.465412	1.09612	3.91e-06	2.00293	0.691215	5.74946e-05
5163	18158073	FBtr0088495 // CG1688 // CG1688 gene product from transcript CG1688-RA // 46B2-46B4 //	CG1688	FBtr0088495	0.77509	1.02108	0.0453417	-1.16295	0.894571	0.104411
15370	18216096	FBtr0074479 // CG12990 // CG12990 gene product from transcript CG12990-RA // 16B12-16B1	CG12990	FBtr0074479	0.567633	-1.09464	0.0150787	-1.496	0.76929	0.0435601
13605	18206076	FBtr0074267 // Fur2 // Furin 2 // 14C1-14C2 // 32604 /// FBtr0301300 // Fur2 // Furin 2	Fur2	FBtr0074267	0.00576474	1.11335	0.0528406	-1.0756	0.0337248	0.117743
2397	18142173	FBtr0309813 // CG17375 // CG17375 gene product from transcript CG17375-RD // 27B3-27B3	CG17375	FBtr0309813	0.099143	-1.17607	5.8e-06	1.68295	0.264171	7.94858e-05
890	18133972	FBtr0300056 // TTLL3B // Tubulin tyrosine ligase-like 3B // 27A2-27A2 // 33946 /// NM_1	TTLL3B	FBtr0300056	0.0874511	1.28561	5.39e-07	2.44841	0.241886	1.19858e-05
15142	18214899	FBtr0071423 // CG15312 // CG15312 gene product from transcript CG15312-RE // 9B1-9B1 //	CG15312	FBtr0071423	0.00174126	-1.20789	5.93e-05	-1.29172	0.0132067	0.000514017
4071	18151711	FBtr0086472 // CG11018 // CG11018 gene product from transcript CG11018-RA // 56E1-56E1	CG11018	FBtr0086472	0.00508517	1.39185	3.98e-10	2.67514	0.0305692	3.02906e-08
4903	18156138	NM_001259307 // Hr46 // Hormone receptor-like in 46 // 46F5-46F7 // 36073 /// FBtr03063	Hr46	NM_001259307	0.530114	-1.04196	0.0606922	-1.13428	0.743855	0.131486
2995	18145433	FBtr0302372 // CG34049 // CG34049 gene product from transcript CG34049-RB // 22D6-22D6	CG34049	FBtr0302372	0.0528415	1.29677	9.2e-08	2.44352	0.1702	2.75023e-06
7168	18169602	FBtr0075457 // CG5027 // CG5027 gene product from transcript CG5027-RA // 72D10-72D10 /	CG5027	FBtr0075457	0.976795	-1.00128	1.45e-05	-1.25193	0.990419	0.000163672
10848	18190061	NM_001260304 // SKIP // Shal K[+] channel interacting protein // 94A2-94A4 // 42601 ///	SKIP	NM_001260304	0.783806	1.01677	0.132701	-1.09721	0.899015	0.242656
12693	18200711	FBtr0300810 // CG17193 // CG17193 gene product from transcript CG17193-RB // 92C2-92C4	CG17193	FBtr0300810	0.0057864	1.24848	0.0990296	1.13577	0.0338272	0.193322
14078	18208694	FBtr0307897 // CG15728 // CG15728 gene product from transcript CG15728-RB // 11B5-11B5	CG15728	FBtr0307897	0.758592	1.03832	0.000100093	1.71761	0.886894	0.000779074
2773	18144305	FBtr0079715 // lectin-29Ca // CG17799 gene product from transcript CG17799-RA // 29C1-2	lectin-29Ca	FBtr0079715	0.954142	1.00813	0.10259	1.26476	0.980514	0.198672
9471	18182225	NM_079758 // nAcRalpha-96Ab // nicotinic Acetylcholine Receptor alpha 96Ab // 96A3-96A3	nAcRalpha-96Ab	NM_079758	0.982304	1.00162	0.00280415	-1.26425	0.993135	0.0110956
15786	18218143	NM_001144688 // CG42265 // CG42265 gene product from transcript CG42265-RE // 5A10-5A10	CG42265	NM_001144688	0.0499153	-1.15628	0.00188578	-1.2735	0.163401	0.00804909
963	18134401	FBtr0079754 // Tsp29Fa // Tetraspanin 29Fa // 29F4-29F4 // 34211 /// NM_078791 // Tsp29	Tsp29Fa	FBtr0079754	0.0784225	1.14696	0.000149492	-1.38453	0.223271	0.00107632
12799	18201360	FBtr0084154 // CG31174 // CG31174 gene product from transcript CG31174-RB // 93F14-93F1	CG31174	FBtr0084154	0.0767618	-1.23812	0.0705867	1.24417	0.220231	0.147954
14003	18208342	FBtr0332934 // CG43902 // CG43902 gene product from transcript CG43902-RA // 9B2-9B3 //	CG43902	FBtr0332934	0.155768	-1.10009	0.0065164	-1.21079	0.354892	0.0220345
15517	18216857	FBtr0070183 // CG11638 // CG11638 gene product from transcript CG11638-RA // 1E1-1E1 //	CG11638	FBtr0070183	0.136156	-1.11424	0.33303	-1.072	0.325761	0.483372
12861	18201680	FBtr0081851 // CG31462 // CG31462 gene product from transcript CG31462-RA // 85A1-85A1	CG31462	FBtr0081851	0.1474	-1.10115	0.71277	1.02438	0.343677	0.813026
6873	18168038	FBtr0077049 // CG6619 // CG6619 gene product from transcript CG6619-RA // 65A5-65A5 //	CG6619	FBtr0077049	0.0394333	-1.1795	0.0012752	-1.31263	0.139707	0.00590128
5588	18160647	FBtr0087082 // Acp53C14a // CG8626 gene product from transcript CG8626-RA // 53D5-53D5	Acp53C14a	FBtr0087082	0.32011	-1.25191	0.20401	1.33444	0.554536	0.337474
5268	18158863	FBtr0301231 // CG8726 // CG8726 gene product from transcript CG8726-RB // 43F9-43F9 //	CG8726	FBtr0301231	0.612296	1.01918	0.0120294	-1.10409	0.799896	0.0364207
8469	18177004	FBtr0113154 // CG17352 // CG17352 gene product from transcript CG17352-RA // 66C8-66C8	CG17352	FBtr0113154	0.000128954	-1.39801	1.2e-06	-1.58485	0.00169331	2.24615e-05
8858	18179051	FBtr0074865 // CG7335 // CG7335 gene product from transcript CG7335-RA // 76F2-76F2 //	CG7335	FBtr0074865	0.832966	-1.02208	4.13e-06	1.77259	0.923243	6.01337e-05
10484	18187972	FBtr0084601 // CG6356 // CG6356 gene product from transcript CG6356-RA // 95F9-95F9 //	CG6356	FBtr0084601	0.00153206	-1.23589	2.43e-10	-1.74878	0.0119819	2.06575e-08
4119	18151943	FBtr0071570 // CG9406 // CG9406 gene product from transcript CG9406-RA // 57C3-57C3 //	CG9406	FBtr0071570	0.701336	1.05576	6.7e-06	2.13381	0.855099	8.83339e-05
8848	18178991	FBtr0074912 // hale // hale-bopp // 76D8-76D8 // 40183 /// NM_140908 // hale // hale-bo	hale	FBtr0074912	0.83485	1.0352	0.000250722	1.97463	0.924025	0.00161496
14451	18210723	FBtr0073962 // CG33177 // CG33177 gene product from transcript CG33177-RA // 13A9-13A9	CG33177	FBtr0073962	4.9e-08	-1.70715	1.14e-07	-1.66871	2.40174e-06	3.28747e-06
13244	18203842	FBtr0302249 // CG42621 // CG42621 gene product from transcript CG42621-RA // --- // 867	CG42621	FBtr0302249	0.328166	-1.08343	0.00433587	1.28179	0.563385	0.0158606
9319	18181369	FBtr0303125 // Ank2 // Ankyrin 2 // 66A10-66A10 // 38863 /// NM_001202141 // Ank2 // An	Ank2	FBtr0303125	0.00595434	-1.16531	0.000179456	-1.24656	0.034586	0.00123851
8935	18179467	FBtr0114546 // CG7140 // CG7140 gene product from transcript CG7140-RB // 79B1-79B1 //	CG7140	FBtr0114546	0.85548	1.02283	0.000125037	1.71358	0.933549	0.000931218
15545	18216998	FBtr0070659 // CG15578 // CG15578 gene product from transcript CG15578-RA // 4B4-4B4 //	CG15578	FBtr0070659	0.119996	1.41569	0.000224181	2.47854	0.299614	0.00147247
3568	18148837	FBtr0112930 // Drep-2 // DNA fragmentation factor-related protein 2 // 45C4-45C5 // 359	Drep-2	FBtr0112930	0.116853	-1.11162	0.165475	-1.09766	0.294514	0.28791
8349	18176403	FBtr0331400 // CG13722 // CG13722 gene product from transcript CG13722-RB // 64B8-64B9	CG13722	FBtr0331400	0.139377	1.10031	0.458638	-1.04842	0.33078	0.607276
8344	18176383	NM_001014560 // DopEcR // Dopamine/Ecdysteroid receptor // 64B2-64B3 // 38539 /// FBtr0	DopEcR	NM_001014560	0.100537	-1.10006	0.136403	-1.08996	0.266218	0.247787
6429	18165250	---	NA	---	0.00019822	-1.38662	1.59e-06	-1.58053	0.00241444	2.83319e-05
6420	18165189	FBtr0301776 // CG42596 // CG42596 gene product from transcript CG42596-RC // --- // 867	CG42596	FBtr0301776	0.0227561	1.19943	0.199313	1.10462	0.093889	0.331518
668	18132802	NM_079996 // SoxN // SoxNeuro // 29F2-29F2 // 44275 /// NM_001273340 // SoxN // SoxNeur	SoxN	NM_079996	0.210792	-1.0917	2.48e-05	-1.40472	0.430951	0.000252046
15406	18216282	FBtr0074605 // CG12609 // CG12609 gene product from transcript CG12609-RB // 17D3-17D3	CG12609	FBtr0074605	0.998415	-1.0003	0.00109162	1.71613	0.999276	0.00521282
10751	18189465	FBtr0082340 // Ugt86Dh // CG4772 gene product from transcript CG4772-RB // 86D6-86D6 //	Ugt86Dh	FBtr0082340	0.776729	1.04129	0.555233	-1.08801	0.895338	0.691724
1775	18138493	NM_001273627 // Acn // Acinus // 37B11-37B12|2-53.9 cM // 35173 /// FBtr0081144 // Acn	Acn	NM_001273627	0.83736	1.00685	4e-05	-1.17073	0.925484	0.0003718
12090	18197492	FBtr0083029 // CG6752 // CG6752 gene product from transcript CG6752-RA // 88E2-88E2 //	CG6752	FBtr0083029	0.278443	-1.07981	1.29e-05	1.43394	0.509971	0.000149754
10212	18186517	FBtr0083171 // CG5614 // CG5614 gene product from transcript CG5614-RA // 89A4-89A4 //	CG5614	FBtr0083171	0.775583	-1.05374	0.0515615	1.44572	0.89476	0.115539
11416	18193555	NM_170147 // nAcRbeta-96A // nicotinic Acetylcholine Receptor beta 96A // 96A5-96A5 //	nAcRbeta-96A	NM_170147	0.0434505	-1.16902	0.200489	-1.10188	0.148991	0.332927
13909	18207854	FBtr0070944 // CG17717 // CG17717 gene product from transcript CG17717-RA // 6C1-6C1 //	CG17717	FBtr0070944	0.092855	-1.18695	5.73e-05	1.58446	0.252092	0.000500402
12885	18201797	FBtr0083234 // CG32855 // CG32855 gene product from transcript CG32855-RA // 89B2-89B2	CG32855	FBtr0083234	0.155198	-1.09789	1.17e-05	-1.39665	0.354034	0.000138082
10434	18187709	FBtr0084338 // CG6660 // CG6660 gene product from transcript CG6660-RA // 94D3-94D4 //	CG6660	FBtr0084338	0.0620504	-1.16582	8.3e-10	-1.99036	0.190195	5.52949e-08
11876	18196195	FBtr0082125 // CG16779 // CG16779 gene product from transcript CG16779-RD // 85D17-85D1	CG16779	FBtr0082125	0.136921	-1.07588	0.00704853	-1.14824	0.32713	0.0235076
11338	18193002	FBtr0084106 // e // ebony // 93C7-93D1|3-70.7 cM // 42521 /// NM_079707 // e // ebony /	e	FBtr0084106	0.179751	-1.08767	0.0472995	-1.13483	0.389731	0.10793
1333	18136456	NR_001662 // pncr003:2L // putative noncoding RNA 003:2L // 36B2-36B2 // 3772689 /// NR	pncr003:2L	NR_001662	0.0956648	1.10871	0.595137	-1.03277	0.257451	0.722647
687	18132901	FBtr0331231 // CG4133 // CG4133 gene product from transcript CG4133-RC // 21C2-21C8 //	CG4133	FBtr0331231	0.0744761	-1.13721	0.0177286	-1.1906	0.215876	0.0494728
9620	18183211	FBtr0333664 // msi // musashi // 96E2-96E4 // 43087 /// NM_001276031 // msi // musashi	msi	FBtr0333664	0.228335	-1.05974	0.0403682	-1.10631	0.452456	0.0950505
6825	18167740	NM_001104030 // VhaM9.7-a // Vacuolar H[+] ATPase subunit M9.7-a // 64A12-64A12 // 3852	VhaM9.7-a	NM_001104030	0.211788	1.10111	0.015843	-1.21267	0.432045	0.0453666
9521	18182515	NM_142050 // ninaB // neither inactivation nor afterpotential B // 87F11-87F11|3-53.5 c	ninaB	NM_142050	0.200451	-1.12447	2.79e-07	-1.7951	0.41801	7.0059e-06
6509	18165744	FBtr0073165 // scrt // scratch // 64A2-64A3 // 38469 /// FBtr0333136 // scrt // scratch	scrt	FBtr0073165	0.0613794	1.11625	0.0315872	-1.13604	0.188776	0.078269
15585	18217217	FBtr0074568 // CG32548 // CG32548 gene product from transcript CG32548-RB // 17B1-17B1	CG32548	FBtr0074568	0.667945	1.06913	0.0335656	1.40953	0.835674	0.0822639
2567	18143242	FBtr0080267 // CG6614 // CG6614 gene product from transcript CG6614-RA // 32F4-32F4 //	CG6614	FBtr0080267	0.120792	-1.25214	0.00712451	1.50101	0.300681	0.023727
7741	18172508	FBtr0300314 // Sfp65A // Seminal fluid protein 65A // 65A15-65A15 // 8674009 /// NM_001	Sfp65A	FBtr0300314	0.413097	-1.20605	0.670416	-1.10189	0.644913	0.781876
7682	18172117	FBtr0333611 // CG34391 // CG34391 gene product from transcript CG34391-RE // 64D1-64D1	CG34391	FBtr0333611	0.666491	-1.0277	0.504418	1.04332	0.835327	0.647868
14990	18214204	FBtr0114487 // CG10804 // CG10804 gene product from transcript CG10804-RB // 3D4-3D4 //	CG10804	FBtr0114487	0.148925	-1.11125	0.30071	-1.07789	0.345327	0.448892
12264	18198453	NM_169896 // Dic2 // Dicarboxylate carrier 2 // 92E12-92E12 // 42423 /// FBtr0083891 //	Dic2	NM_169896	0.415907	-1.13492	0.00637317	1.56692	0.646887	0.0216379
9621	18183222	NM_057678 // repo // reversed polarity // 90F9-90F10 // 47285 /// FBtr0083564 // repo /	repo	NM_057678	0.195714	-1.08563	0.000190271	-1.30084	0.412109	0.00130159
12248	18198385	NM_142589 // Xport // exit protein of rhodopsin and TRP // 92B6-92B6 // 42373 /// NM_00	Xport	NM_142589	0.00242503	-1.29645	6.04e-05	-1.44011	0.0171939	0.000521337
13042	18202736	NM_142589 // Xport // exit protein of rhodopsin and TRP // 92B6-92B6 // 42373 /// NM_00	Xport	NM_142589	0.00242503	-1.29645	6.04e-05	-1.44011	0.0171939	0.000521337
12470	18199604	FBtr0084922 // CG17196 // CG17196 gene product from transcript CG17196-RC // 96F2-96F2	CG17196	FBtr0084922	0.779868	1.04354	0.00256929	1.64186	0.896914	0.010375
7844	18173291	FBtr0304982 // mub // mushroom-body expressed // 78F4-79A3 // 40436 /// NM_001259947 //	mub	FBtr0304982	0.000777367	-1.10506	3.7e-05	-1.13765	0.00703823	0.000350705
4139	18152082	FBtr0071716 // CG4021 // CG4021 gene product from transcript CG4021-RA // 58A1-58A1 //	CG4021	FBtr0071716	0.498945	-1.13594	0.0353733	1.50664	0.719288	0.0857895
14538	18211364	FBtr0301750 // CG42594 // CG42594 gene product from transcript CG42594-RB // 4D5-4D5 //	CG42594	FBtr0301750	0.0592998	-1.17403	0.121116	-1.13952	0.18436	0.226529
15485	18216699	FBtr0077219 // CG1678 // CG1678 gene product from transcript CG1678-RA // 20A1-20A1 //	CG1678	FBtr0077219	0.594948	-1.11641	0.589547	-1.11822	0.78853	0.718509
13624	18206232	NM_078697 // Obp19d // Odorant-binding protein 19d // 19D1-19D1 // 33040 /// FBtr007730	Obp19d	NM_078697	0.00288021	-1.13182	6.6e-05	-1.19278	0.0197524	0.000559031
15175	18215057	FBtr0073537 // CG2533 // CG2533 gene product from transcript CG2533-RA // 10C10-10C10 /	CG2533	FBtr0073537	0.623912	-1.0665	0.00046579	1.66293	0.807573	0.00263523
4362	18153216	NR_048187 // CR9284 // ncRNA // 58A2-58A2 // 12798136	CR9284	NR_048187	0.810713	-1.0416	0.00102981	1.8426	0.913087	0.00497148
876	18133910	FBtr0079204 // CG13989 // CG13989 gene product from transcript CG13989-RA // 26B9-26B9	CG13989	FBtr0079204	0.651519	1.06394	0.000239771	1.75789	0.826319	0.00155847
2622	18143501	FBtr0080522 // CG10859 // CG10859 gene product from transcript CG10859-RA // 34B10-34B1	CG10859	FBtr0080522	0.663669	1.06761	4.68e-05	2.02282	0.833968	0.000423901
5602	18160743	FBtr0086996 // CG18469 // CG18469 gene product from transcript CG18469-RA // 54B1-54B1	CG18469	FBtr0086996	0.000439048	1.74965	5.19e-08	2.75596	0.00449288	1.7148e-06
3081	18145888	FBtr0077803 // CG17242 // CG17242 gene product from transcript CG17242-RB // 22D6-22D6	CG17242	FBtr0077803	0.679104	-1.08414	0.0229833	-1.58855	0.841448	0.0607405
6844	18167860	FBtr0289982 // CG17150 // CG17150 gene product from transcript CG17150-RD // 64C1-64C2	CG17150	FBtr0289982	0.0012556	1.40785	1.73e-09	2.24693	0.0102933	1.01572e-07
9371	18181697	FBtr0306915 // CG43330 // CG43330 gene product from transcript CG43330-RA // 79E5-79E6	CG43330	FBtr0306915	0.062413	1.14387	0.194972	1.09649	0.190769	0.326126
12282	18198568	FBtr0300816 // CG17279 // CG17279 gene product from transcript CG17279-RB // 93B7-93B7	CG17279	FBtr0300816	0.304419	1.09479	0.0149218	-1.2505	0.538906	0.0431833
14446	18210703	FBtr0307181 // CG32815 // CG32815 gene product from transcript CG32815-RC // 1D2-1D2 //	CG32815	FBtr0307181	0.630328	-1.03124	0.295955	-1.06959	0.811074	0.443783
6772	18167392	FBtr0072938 // CG1246 // CG1246 gene product from transcript CG1246-RC // 62E8-62E8 //	CG1246	FBtr0072938	0.136012	1.2187	0.743509	-1.04359	0.325602	0.833014
15250	18215446	FBtr0073923 // Fbxl4 // F box and leucine-rich-repeat gene 4 // 12E5-12E5 // 32378 ///	Fbxl4	FBtr0073923	0.00481556	-1.21755	0.000285642	-1.30341	0.029372	0.00178911
12352	18198947	FBtr0084400 // CG13829 // CG13829 gene product from transcript CG13829-RA // 94E3-94E3	CG13829	FBtr0084400	0.880523	1.0224	0.000104502	1.91502	0.945582	0.000805293
3797	18150196	FBtr0087981 // CG13186 // CG13186 gene product from transcript CG13186-RA // 48E1-48E1	CG13186	FBtr0087981	0.00116108	-1.79065	0.866348	1.02801	0.00970858	0.915579
15258	18215495	FBtr0073939 // CG15890 // CG15890 gene product from transcript CG15890-RA // 12F4-12F4	CG15890	FBtr0073939	0.000495806	-1.25501	7.64e-06	-1.36754	0.00491948	9.82664e-05
748	18133245	NM_134837 // VGlut // Vesicular glutamate transporter // 22E1-22E1 // 33427 /// NM_0012	VGlut	NM_134837	0.0334867	-1.15377	0.0707193	-1.12785	0.124305	0.148167
10847	18190057	FBtr0304668 // CG31161 // CG31161 gene product from transcript CG31161-RB // 94B6-94B6	CG31161	FBtr0304668	0.0331785	1.31755	1.18e-06	2.10416	0.123433	2.21379e-05
8872	18179127	FBtr0078233 // CG5282 // CG5282 gene product from transcript CG5282-RA // 77C2-77C2 //	CG5282	FBtr0078233	0.0664819	-1.15745	5.68e-06	-1.52197	0.199324	7.85004e-05
15453	18216532	FBtr0070035 // CG17003 // CG17003 gene product from transcript CG17003-RA // 19A4-19A4	CG17003	FBtr0070035	0.97655	1.00454	0.0025618	1.6519	0.990419	0.0103551
8526	18177356	FBtr0076316 // CG14160 // CG14160 gene product from transcript CG14160-RA // 67D8-67D8	CG14160	FBtr0076316	0.0335901	-1.26347	3.02e-06	-1.81809	0.124547	4.73056e-05
3950	18151034	NM_137288 // S-Lap8 // Sperm-Leucylaminopeptidase 8 // 53C6-53C6 // 36844 /// FBtr00870	S-Lap8	NM_137288	0.543859	-1.10001	0.00287873	1.6531	0.753509	0.0113166
10306	18186941	FBtr0083669 // CG7708 // CG7708 gene product from transcript CG7708-RA // 91C1-91C1 //	CG7708	FBtr0083669	0.0509727	-1.16106	0.00194503	-1.28274	0.166129	0.00826524
8555	18177507	FBtr0076156 // CG11714 // CG11714 gene product from transcript CG11714-RC // 68C12-68C1	CG11714	FBtr0076156	0.008486	1.40244	6.17e-06	1.9231	0.0452051	8.316e-05
13022	18202585	FBtr0290334 // Octbeta3R // CG42244 gene product from transcript CG42244-RJ // 87B15-87	Octbeta3R	FBtr0290334	0.596142	-1.0409	0.00282916	-1.27476	0.789343	0.0111756
3030	18145558	FBtr0301005 // CG34161 // CG34161 gene product from transcript CG34161-RA // 32A1-32A1	CG34161	FBtr0301005	0.595977	-1.09985	0.00609569	1.68703	0.789188	0.0209054
3888	18150655	NM_137116 // Dh44-R1 // Diuretic hormone 44 receptor 1 // 50F8-50F9 // 36601 /// FBtr00	Dh44-R1	NM_137116	0.00281202	-1.28859	0.00030796	-1.37341	0.0193866	0.00189938
11808	18195844	FBtr0081554 // CG1287 // CG1287 gene product from transcript CG1287-RA // 84D9-84D9 //	CG1287	FBtr0081554	0.264615	-1.08375	9.76e-06	1.4527	0.494736	0.000120228
960	18134394	FBtr0079731 // CG9314 // CG9314 gene product from transcript CG9314-RC // 29E4-29E4 //	CG9314	FBtr0079731	0.81428	-1.03635	0.0105215	1.50737	0.914266	0.0327171
12097	18197532	FBtr0083123 // CG6276 // CG6276 gene product from transcript CG6276-RA // 88F1-88F1 //	CG6276	FBtr0083123	0.398188	1.05481	0.833089	-1.01333	0.631667	0.895454
13274	18204195	FBtr0307333 // Caps // Calcium activated protein for secretion // 102F8-102F8 // 49968	Caps	FBtr0307333	0.0224161	-1.12614	9.95e-08	-1.40597	0.0930508	2.9528e-06
2098	18140530	NM_001169374 // Eaat2 // Excitatory amino acid transporter 2 // 21E2-21E2 // 33247 ///	Eaat2	NM_001169374	2.58e-05	-1.32785	7.36e-07	-1.42616	0.000464286	1.52256e-05
6651	18166648	FBtr0072505 // miple // CG1221 gene product from transcript CG1221-RC // 61B3-61B3 // 3	miple	FBtr0072505	0.280193	-1.07091	0.00551702	-1.20437	0.511716	0.0192989
5652	18160994	FBtr0299528 // CG15086 // CG15086 gene product from transcript CG15086-RF // 55E6-55E6	CG15086	FBtr0299528	0.860348	-1.03078	0.00304758	1.73219	0.936215	0.0118632
11018	18190920	FBtr0112483 // CG34287 // CG34287 gene product from transcript CG34287-RA // 83C5-83C5	CG34287	FBtr0112483	0.652858	1.08492	0.00124486	1.8918	0.827022	0.00579538
2936	18145262	FBtr0081455 // CG33322 // CG33322 gene product from transcript CG33322-RA // 38F1-38F1	CG33322	FBtr0081455	0.878263	1.02193	0.000146594	1.83619	0.944895	0.00105993
10046	18185640	FBtr0082289 // CG4596 // CG4596 gene product from transcript CG4596-RA // 86C7-86C7 //	CG4596	FBtr0082289	0.287491	-1.08015	0.0027045	-1.26144	0.519304	0.0107823
3442	18147989	FBtr0086110 // sced // scrambled // 42C2-42C3 // 35564 /// NM_136375 // sced // scrambl	sced	FBtr0086110	0.673208	-1.02399	0.878941	-1.00859	0.838466	0.923944
10402	18187500	FBtr0310204 // Gld2 // CG5732 gene product from transcript CG5732-RC // 94A3-94A3 // 42	Gld2	FBtr0310204	0.911541	1.01185	4.15e-06	1.79747	0.960211	6.03173e-05
9433	18181997	NR_073947 // mir-5614 // mir-5614 stem loop // 75E6-75E6 // 14462882 /// FBtr0333710 //	mir-5614	NR_073947	0.183394	1.19915	0.00253917	-1.55013	0.395006	0.010284
6224	18164154	NM_165534 // wech // CG42396 gene product from transcript CG42396-RC // 43C5-43C5 // 44	wech	NM_165534	0.0561726	-1.1014	0.00142557	-1.18587	0.177512	0.00644904
5687	18161210	FBtr0086341 // CG13872 // CG13872 gene product from transcript CG13872-RA // 56E4-56E4	CG13872	FBtr0086341	0.202471	1.19575	4.26e-05	1.92242	0.42061	0.000391949
2768	18144286	FBtr0300121 // CG2528 // CG2528 gene product from transcript CG2528-RB // 40D1-40D2 //	CG2528	FBtr0300121	0.27114	-1.19787	0.00198774	1.72323	0.502296	0.00840951
15686	18217764	FBtr0302419 // CG33669 // CG33669 gene product from transcript CG33669-RC // 5F6-5F6 //	CG33669	FBtr0302419	0.637517	-1.05624	0.00271047	1.45463	0.817118	0.0107993
2810	18144500	FBtr0079379 // CG17376 // CG17376 gene product from transcript CG17376-RA // 27B2-27B3	CG17376	FBtr0079379	0.899486	1.02492	0.0299886	1.55231	0.954395	0.0751303
5500	18160206	NM_137094 // VGAT // Vesicular GABA Transporter // 50E4-50E4 // 36574 /// FBtr0087577 /	VGAT	NM_137094	0.597627	-1.03971	0.367412	-1.06907	0.790596	0.519617
2927	18145126	FBtr0302456 // CG33125 // CG33125 gene product from transcript CG33125-RC // 23A2-23A2	CG33125	FBtr0302456	0.232185	-1.21552	0.00343201	1.66114	0.457103	0.013082
2298	18141597	FBtr0077459 // CG15431 // CG15431 gene product from transcript CG15431-RA // 24F1-24F2	CG15431	FBtr0077459	0.0315839	-1.1464	0.0172854	-1.16491	0.119249	0.0485264
15015	18214329	FBtr0070759 // CG5062 // CG5062 gene product from transcript CG5062-RA // 4F2-4F2 // 31	CG5062	FBtr0070759	0.904423	-1.01618	0.000865806	1.63012	0.956769	0.00433887
15229	18215335	FBtr0304001 // Rbp1-like // CG1987 gene product from transcript CG1987-RA // 11F1-11F1	Rbp1-like	FBtr0304001	1.85e-05	-1.15387	4.56e-10	-1.28756	0.000350705	3.39855e-08
7497	18171292	FBtr0075735 // CG32141 // CG32141 gene product from transcript CG32141-RA // 70D3-70D3	CG32141	FBtr0075735	0.072851	-1.21322	0.000211279	1.54767	0.212486	0.00140927
5457	18159995	FBtr0087797 // CG13323 // CG13323 gene product from transcript CG13323-RA // 49F1-49F1	CG13323	FBtr0087797	0.556995	1.10338	0.183792	1.25265	0.763063	0.311835
9575	18182909	FBtr0304608 // pros // prospero // 86E2-86E4 // 41363 /// NM_001260117 // pros // prosp	pros	FBtr0304608	0.938229	-1.00441	0.177423	-1.08083	0.973354	0.303681
13445	18205102	FBtr0308919 // CG43176 // CG43176 gene product from transcript CG43176-RB // --- // 127	CG43176	FBtr0308919	0.112848	-1.26229	0.256543	1.1794	0.287708	0.399704
9641	18183311	FBtr0082927 // Crz // Corazonin // 88B3-88B3 // 41742 /// NM_079626 // Crz // Corazonin	Crz	FBtr0082927	0.219886	1.12487	0.0158057	-1.2712	0.442198	0.0452677
11200	18192135	FBtr0304646 // CG43062 // CG43062 gene product from transcript CG43062-RA // 86E17-86E1	CG43062	FBtr0304646	4.79e-07	1.88585	2.65e-12	3.03296	1.66345e-05	4.80592e-10
14875	18213505	NM_078555 // Ant2 // Adenine nucleotide translocase 2 // 9E9-9F1 // 32008 /// FBtr00734	Ant2	NM_078555	0.0447782	-1.24082	0.00591525	1.35654	0.151457	0.0204272
14541	18211385	NM_176727 // inaE // inactivation no afterpotential E // 12C4-12C5 // 32343 /// NM_0011	inaE	NM_176727	0.0956067	-1.08369	0.000307343	-1.20916	0.257337	0.0018973
1855	18138803	FBtr0332558 // ab // abrupt // 32E1-32E2|2-44.0 cM // 34560 /// NM_057214 // ab // abru	ab	FBtr0332558	0.0144519	-1.16616	0.00129527	-1.23351	0.0674339	0.00597325
4698	18154748	FBtr0114365 // jing // CG9397 gene product from transcript CG9397-RI // 42C1-42B2 // 35	jing	FBtr0114365	0.0564521	-1.10025	0.00365714	-1.16368	0.178223	0.0137793
12959	18202221	FBtr0308890 // CG11768 // CG11768 gene product from transcript CG11768-RC // 85A10-85B1	CG11768	FBtr0308890	0.650293	1.03029	0.00615875	-1.21124	0.825806	0.0210608
9118	18180346	FBtr0078578 // CG32459 // CG32459 gene product from transcript CG32459-RA // 80B1-80B1	CG32459	FBtr0078578	0.298672	-1.13775	0.000534709	1.6025	0.531791	0.00293856
8819	18178834	FBtr0330091 // CG14082 // CG14082 gene product from transcript CG14082-RC // 75F7-75F9	CG14082	FBtr0330091	3.65e-05	-1.40428	0.00352501	-1.24945	0.000612915	0.013371
9526	18182539	NM_079821 // Pkc98E // Protein C kinase 98E // 98F6-98F6 // 43428 /// FBtr0085359 // Pk	Pkc98E	NM_079821	0.0702157	-1.06167	0.0171959	-1.08366	0.206945	0.0483416
12523	18199889	FBtr0085200 // CG5612 // CG5612 gene product from transcript CG5612-RA // 98A11-98A12 /	CG5612	FBtr0085200	0.0331283	-1.12659	5.59e-08	-1.46175	0.123368	1.82116e-06
10493	18188027	FBtr0084643 // CG13618 // CG13618 gene product from transcript CG13618-RA // 96A5-96A6	CG13618	FBtr0084643	0.591019	-1.0402	1.31e-07	-1.63746	0.785299	3.68652e-06
4210	18152411	FBtr0072001 // CG13541 // CG13541 gene product from transcript CG13541-RA // 59D4-59D4	CG13541	FBtr0072001	0.953487	-1.00753	9.66e-05	1.76966	0.980442	0.00075694
7384	18170658	NM_001104199 // nAcRalpha-80B // nicotinic Acetylcholine Receptor alpha 80B // 80D5-80E	nAcRalpha-80B	NM_001104199	0.0618794	-1.14701	0.0478389	-1.15705	0.189742	0.108856
8896	18179243	FBtr0114617 // CG12983 // CG12983 gene product from transcript CG12983-RE // 78A1-78A1	CG12983	FBtr0114617	0.265153	-1.21615	0.0456848	1.43195	0.495572	0.104926
10711	18189250	FBtr0085700 // CG15543 // CG15543 gene product from transcript CG15543-RA // 100A3-100A	CG15543	FBtr0085700	0.00360944	-1.59969	0.445708	1.12213	0.0235504	0.59581
9646	18183380	NM_079864 // Gycbeta100B // Guanylyl cyclase beta-subunit at 100B // 100B4-100B5 // 436	Gycbeta100B	NM_079864	0.215913	-1.10173	0.101754	-1.13807	0.437071	0.197285
5590	18160653	FBtr0087079 // unc-104 // CG8566 gene product from transcript CG8566-RH // 53D6-53D7 //	unc-104	FBtr0087079	0.0354459	-1.12507	0.000175733	-1.25652	0.129545	0.00121925
5297	18159022	FBtr0088724 // CG8584 // CG8584 gene product from transcript CG8584-RA // 44E2-44E2 //	CG8584	FBtr0088724	0.656515	1.08068	7.99e-05	2.19127	0.829466	0.00064882
3108	18146108	FBtr0300297 // Sfp24Bb // Seminal fluid protein 24Bb // 24B1-24B1 // 8674094 /// NM_001	Sfp24Bb	FBtr0300297	1.43e-06	-2.87622	2.88e-08	-3.68789	4.21308e-05	1.03999e-06
1154	18135409	FBtr0329926 // CG15155 // CG15155 gene product from transcript CG15155-RA // 36E6-36E6	CG15155	FBtr0329926	0.565117	1.09581	0.223664	1.21575	0.768013	0.361271
2183	18141020	FBtr0308252 // CG17075 // CG17075 gene product from transcript CG17075-RB // 21B6-21B7	CG17075	FBtr0308252	0.346325	1.06487	0.0130091	-1.18911	0.581194	0.0387755
14301	18209891	FBtr0074790 // CG14234 // CG14234 gene product from transcript CG14234-RA // 18E5-18E5	CG14234	FBtr0074790	0.126372	1.12677	0.147864	-1.11937	0.310642	0.263591
12278	18198545	FBtr0083987 // CG3822 // CG3822 gene product from transcript CG3822-RA // 93A2-93A2 //	CG3822	FBtr0083987	0.206196	-1.10451	0.00143344	-1.30923	0.424887	0.00647747
9455	18182138	NM_001170373 // ARY // Aldehyde reductase Y // --- // 3355076 /// FBtr0301808 // ARY //	ARY	NM_001170373	0.0640267	-1.33207	0.0262601	1.41685	0.194102	0.0676266
12435	18199460	FBtr0113286 // CG13650 // CG13650 gene product from transcript CG13650-RB // 96C1-96C1	CG13650	FBtr0113286	0.000439386	-1.26064	2.48e-05	-1.33844	0.00449352	0.000252046
12810	18201424	FBtr0083875 // CG31206 // CG31206 gene product from transcript CG31206-RA // 92D1-92D1	CG31206	FBtr0083875	0.871822	1.02506	0.000302636	1.85663	0.941529	0.00187676
15300	18215690	NM_167456 // Pis // Phosphatidylinositol synthase // 13E8-13E8 // 32506 /// FBtr0074059	Pis	NM_167456	0.486958	1.02317	0.000567541	-1.13322	0.709274	0.0030755
14229	18209486	FBtr0300778 // CG12992 // CG12992 gene product from transcript CG12992-RE // 16B6-16B6	CG12992	FBtr0300778	0.362469	-1.06633	4.29e-06	1.47174	0.59663	6.20207e-05
11806	18195837	FBtr0081590 // CG17944 // CG17944 gene product from transcript CG17944-RB // 84D5-84D5	CG17944	FBtr0081590	0.485774	-1.10172	6.45e-05	1.8847	0.708435	0.000548603
12303	18198688	FBtr0084152 // CG17819 // CG17819 gene product from transcript CG17819-RA // 93F14-93F1	CG17819	FBtr0084152	0.418336	1.14471	4.97e-05	2.1718	0.649242	0.000445961
10048	18185647	NM_141781 // Tengl4 // Testis EndoG-Like 4 // 86C12-86C13 // 41321 /// FBtr0082326 // T	Tengl4	NM_141781	0.505649	-1.12229	0.00464962	1.68642	0.725046	0.0167826
2630	18143527	FBtr0301695 // CG4650 // CG4650 gene product from transcript CG4650-RB // 35B5-35B5 //	CG4650	FBtr0301695	5.41e-21	11.7469	3.6e-20	10.063	1.26146e-17	7.3449e-17
614	18132521	FBtr0080549 // CG7916 // CG7916 gene product from transcript CG7916-RA // 34D7-34D7 //	CG7916	FBtr0080549	0.783469	-1.03497	0.0597877	-1.2742	0.898902	0.129958
1606	18137542	FBtr0329979 // CG34380 // CG34380 gene product from transcript CG34380-RD // 26B11-26B1	CG34380	FBtr0329979	0.00896451	-1.17717	3.18e-06	-1.39294	0.0470128	4.89198e-05
9501	18182412	FBtr0082707 // Hsc70-2 // Heat shock protein cognate 2 // 87D10-87D10 // 41609 /// NM_0	Hsc70-2	FBtr0082707	0.393401	1.10839	1.43e-05	1.84283	0.627918	0.000162651
7599	18171789	FBtr0078291 // CG33284 // CG33284 gene product from transcript CG33284-RA // 78B2-78B2	CG33284	FBtr0078291	0.904423	1.01765	0.00117955	1.67584	0.956769	0.00555791
15838	18218591	FBtr0074805 // pico // CG11940 gene product from transcript CG11940-RB // 18F2-18F4 //	pico	FBtr0074805	0.0857118	1.07175	0.703637	-1.0151	0.23841	0.806628
3803	18150216	NM_136901 // Cyp6t3 // CG8457 gene product from transcript CG8457-RA // 48E7-48E8 // 36	Cyp6t3	NM_136901	9.2e-05	-1.45015	2.58e-05	-1.50469	0.00129005	0.000260425
9025	18179858	FBtr0076133 // CG32085 // CG32085 gene product from transcript CG32085-RA // 68D1-68D2	CG32085	FBtr0076133	0.0811941	-1.0796	0.259634	-1.05	0.229203	0.403001
12822	18201483	FBtr0082312 // CG31272 // CG31272 gene product from transcript CG31272-RA // 86C5-86C5	CG31272	FBtr0082312	0.00241634	-1.40791	0.0359524	-1.25495	0.0171625	0.086807
13938	18208032	FBtr0071067 // CG11369 // CG11369 gene product from transcript CG11369-RA // 7B4-7B4 //	CG11369	FBtr0071067	0.754719	-1.05482	0.0028545	1.73079	0.88465	0.0112539
3790	18150154	FBtr0304622 // ths // thisbe // 48C3-48C4 // 36258 /// FBtr0304623 // ths // thisbe //	ths	FBtr0304622	0.152654	-1.09745	0.000187051	-1.30846	0.35061	0.00128279
4284	18152829	FBtr0072316 // CG3565 // CG3565 gene product from transcript CG3565-RA // 60D9-60D9 //	CG3565	FBtr0072316	0.511201	1.10355	0.000415868	1.79689	0.729205	0.00240276
15002	18214262	FBtr0070654 // CG12693 // CG12693 gene product from transcript CG12693-RB // 4B6-4B6 //	CG12693	FBtr0070654	0.0192317	-1.53394	0.28564	1.2071	0.0831743	0.432447
6155	18163675	FBtr0112391 // CG34198 // CG34198 gene product from transcript CG34198-RA // 56E1-56E1	CG34198	FBtr0112391	0.0230349	1.47615	0.390376	1.15241	0.0947042	0.542089
2744	18144103	FBtr0081396 // CG9316 // CG9316 gene product from transcript CG9316-RA // 38E4-38E4 //	CG9316	FBtr0081396	0.745244	-1.06185	0.0131654	1.61846	0.879782	0.0391161
4097	18151839	FBtr0086229 // CG13436 // CG13436 gene product from transcript CG13436-RA // 57A8-57A8	CG13436	FBtr0086229	0.857856	1.01716	6.3e-06	1.66736	0.934521	8.44935e-05
2607	18143438	FBtr0080488 // CG16972 // CG16972 gene product from transcript CG16972-RA // 34A9-34A9	CG16972	FBtr0080488	0.482551	1.0464	2.11e-07	1.52594	0.705879	5.51914e-06
3684	18149508	NM_136540 // Mal-A8 // Maltase A8 // 44D1-44D1 // 35830 /// FBtr0088752 // Mal-A8 // Ma	Mal-A8	NM_136540	0.0944895	-1.37444	0.0149982	-1.60782	0.255129	0.0433543
7474	18171122	NM_001259778 // A2bp1 // Ataxin-2 binding protein 1 // 67E4-67E5 // 39198 /// FBtr03050	A2bp1	NM_001259778	0.000131338	-1.18348	5.48e-05	-1.19762	0.00171633	0.000481143
8650	18177993	FBtr0075729 // CG3868 // CG3868 gene product from transcript CG3868-RA // 70D6-70D6 //	CG3868	FBtr0075729	1.55e-05	2.2897	0.00187947	1.73403	0.000305176	0.00802845
3589	18148949	FBtr0087414 // hbs // hibris // 51D8-51D8 // 44129 /// FBtr0087413 // hbs // hibris //	hbs	FBtr0087414	0.0312658	-1.17645	0.964196	1.00326	0.118486	0.97749
12872	18201714	FBtr0078987 // CG31516 // CG31516 gene product from transcript CG31516-RA // 82A1-82A1	CG31516	FBtr0078987	1.06e-05	-1.52382	0.0105934	-1.24408	0.000225866	0.0328968
10082	18185797	NM_169429 // HisCl1 // Histamine-gated chloride channel subunit 1 // 86F7-86F8 // 41426	HisCl1	NM_169429	0.609381	-1.03612	0.00722452	-1.21859	0.798348	0.0239889
13620	18206207	NM_176711 // Tbh // Tyramine beta hydroxylase // 7D2-7D2 // 31718 /// FBtr0089999 // Tb	Tbh	NM_176711	0.0225115	-1.17858	0.0324787	-1.16554	0.093257	0.0800902
12814	18201447	FBtr0083676 // CG31226 // CG31226 gene product from transcript CG31226-RB // 91D2-91D2	CG31226	FBtr0083676	0.016146	-1.42585	0.00615297	1.50671	0.0730892	0.0210498
15684	18217758	FBtr0302416 // CG33667 // CG33667 gene product from transcript CG33667-RB // 6A2-6A2 //	CG33667	FBtr0302416	0.970739	1.0035	3.92e-05	1.57264	0.987784	0.000367081
5182	18158242	NM_166313 // Vha100-3 // Vacuolar H[+] ATPase subunit 100-3 // 55F11-55F11 // 246543 //	Vha100-3	NM_166313	0.709447	-1.04335	0.000158894	1.62402	0.858229	0.00112858
551	18132118	NM_058060 // Cdlc2 // Cytoplasmic dynein light chain 2 // 22A1-22A1 // 33319 /// FBtr00	Cdlc2	NM_058060	0.0676232	-1.37984	0.0530766	1.40765	0.201524	0.118156
2169	18140938	FBtr0080785 // CG15255 // CG15255 gene product from transcript CG15255-RA // 35D3-35D3	CG15255	FBtr0080785	0.138521	1.31572	0.561516	-1.11172	0.329583	0.697228
4111	18151892	FBtr0071521 // CG9313 // CG9313 gene product from transcript CG9313-RA // 57B5-57B5 //	CG9313	FBtr0071521	0.640967	-1.04551	0.00265058	1.36181	0.818931	0.0106211
10091	18185843	FBtr0082559 // CG10014 // CG10014 gene product from transcript CG10014-RA // 87B2-87B2	CG10014	FBtr0082559	0.711207	1.05936	0.0550959	1.36019	0.858794	0.121798
1413	18136874	FBtr0079138 // CG31913 // CG31913 gene product from transcript CG31913-RA // 25F4-25F4	CG31913	FBtr0079138	0.39645	-1.10813	2.55e-05	1.8038	0.630381	0.000258035
1101	18135144	FBtr0080431 // CG5122 // CG5122 gene product from transcript CG5122-RA // 34A5-34A6 //	CG5122	FBtr0080431	0.466853	-1.11685	0.00175904	1.67121	0.692347	0.00760558
15337	18215914	FBtr0074363 // spheroide // CG9675 gene product from transcript CG9675-RA // 15A1-15A2	spheroide	FBtr0074363	0.258558	1.17183	0.55519	-1.08565	0.488864	0.691724
14223	18209459	FBtr0074392 // CG18258 // CG18258 gene product from transcript CG18258-RA // 15F3-15F4	CG18258	FBtr0074392	0.0595599	1.32814	0.0123098	-1.47067	0.184922	0.0370907
15876	18218751	FBtr0307022 // CG43347 // CG43347 gene product from transcript CG43347-RC // 9D4-9D4 //	CG43347	FBtr0307022	0.048276	-1.13829	0.0059172	-1.20465	0.159474	0.0204274
10901	18190365	FBtr0083432 // CG31418 // CG31418 gene product from transcript CG31418-RA // 90A1-90A1	CG31418	FBtr0083432	0.00463002	-1.48731	0.00626735	-1.46436	0.0284744	0.0213606
1452	18137063	FBtr0091499 // lectin-37Db // CG33533 gene product from transcript CG33533-RA // 37D6-3	lectin-37Db	FBtr0091499	0.0264792	1.34762	0.185751	-1.18918	0.104823	0.314177
1647	18137808	FBtr0300310 // Sfp33A3 // Seminal fluid protein 33A3 // 33A3-33A3 // 8674115 /// NM_001	Sfp33A3	FBtr0300310	0.0013727	1.67169	3.04e-07	2.583	0.0110425	7.55234e-06
2396	18142165	FBtr0309815 // CG17377 // CG17377 gene product from transcript CG17377-RB // 27B3-27B3	CG17377	FBtr0309815	0.953978	-1.01094	0.0522554	1.45877	0.980469	0.116757
12216	18198196	FBtr0083677 // CG18208 // CG18208 gene product from transcript CG18208-RC // 91D1-91D2	CG18208	FBtr0083677	0.506742	-1.04301	0.000730677	-1.26491	0.72553	0.00378487
1974	18139696	NM_078781 // Obp28a // Odorant-binding protein 28a // 28A4-28A4 // 34031 /// FBtr007945	Obp28a	NM_078781	0.549061	1.05268	0.372881	-1.07964	0.75729	0.524715
9261	18180990	FBtr0333375 // corn // cornetto // 65E5-65E6 // 38786 /// FBtr0333374 // corn // cornet	corn	FBtr0333375	0.00590479	1.21279	0.767696	-1.01964	0.0343471	0.849483
7731	18172441	FBtr0300044 // CG42393 // CG42393 gene product from transcript CG42393-RA // 75B5-75B5	CG42393	FBtr0300044	0.590237	-1.10992	0.0513813	1.47461	0.785119	0.115248
12125	18197705	FBtr0083325 // CG14879 // CG14879 gene product from transcript CG14879-RC // 89B13-89B1	CG14879	FBtr0083325	0.0222647	-1.15214	0.000354942	-1.26621	0.09254	0.00212211
4741	18155094	FBtr0114575 // qvr // quiver // 47F13-47F13|2-62 cM // 2768718 /// NM_001144174 // qvr	qvr	FBtr0114575	0.387889	-1.04329	0.0169566	-1.1299	0.622599	0.0478254
8244	18175846	NM_079161 // GC // gamma-glutamyl carboxylase // 62A9-62A9 // 38194 /// FBtr0072821 //	GC	NM_079161	0.13593	1.12587	0.121586	1.13118	0.325602	0.227219
5209	18158424	FBtr0086026 // CG14591 // CG14591 gene product from transcript CG14591-RD // 42A8-42A8	CG14591	FBtr0086026	0.000388715	-1.22822	2.69e-06	-1.34431	0.00409594	4.33427e-05
6734	18167176	FBtr0091793 // CG33791 // CG33791 gene product from transcript CG33791-RB // 62A7-62A8	CG33791	FBtr0091793	0.792407	-1.04006	0.00127176	1.6895	0.904045	0.00588944
6735	18167192	FBtr0091793 // CG33791 // CG33791 gene product from transcript CG33791-RB // 62A7-62A8	CG33791	FBtr0091793	0.792407	-1.04006	0.00127176	1.6895	0.904045	0.00588944
9173	18180580	FBtr0111152 // CG40470 // CG40470 gene product from transcript CG40470-RA // --- // 335	CG40470	FBtr0111152	1.64e-08	-1.70479	1.17e-08	-1.71981	9.56003e-07	4.93456e-07
3905	18150729	FBtr0087408 // CG10257 // CG10257 gene product from transcript CG10257-RA // 51D5-51D5	CG10257	FBtr0087408	2.3e-07	-1.70328	1.83e-06	-1.60532	8.89588e-06	3.15409e-05
3352	18147300	FBtr0072170 // sei // seizure // 60B5-60B6|2-106 cM // 37843 /// NM_166653 // sei // se	sei	FBtr0072170	0.000451231	-1.25623	9.18e-07	-1.42583	0.00458592	1.80504e-05
10613	18188663	FBtr0302589 // Tusp // CG5586 gene product from transcript CG5586-RF // 98A12-98A12 //	Tusp	FBtr0302589	0.221097	1.09038	0.0490306	-1.15252	0.443771	0.111119
783	18133423	FBtr0077580 // CG15406 // CG15406 gene product from transcript CG15406-RA // 23E3-23E3	CG15406	FBtr0077580	0.752816	1.04994	0.802773	1.0394	0.883506	0.874421
8473	18177032	FBtr0076659 // CG6983 // CG6983 gene product from transcript CG6983-RA // 66C13-66C13 /	CG6983	FBtr0076659	0.22615	-1.05548	0.000552802	-1.18336	0.449885	0.00301263
7505	18171327	FBtr0075186 // Ccn // CG32183 gene product from transcript CG32183-RB // 74F1-75A1 // 3	Ccn	FBtr0075186	0.273919	-1.07989	0.000315076	-1.32272	0.505416	0.00193261
13266	18204127	FBtr0089196 // Kif3C // CG17461 gene product from transcript CG17461-RA // 102F8-102F8	Kif3C	FBtr0089196	0.267725	1.08142	0.573358	1.04026	0.499343	0.705684
4432	18153587	FBtr0300458 // CG30222 // CG30222 gene product from transcript CG30222-RF // 57F2-57F2	CG30222	FBtr0300458	0.520303	1.11427	0.00365675	1.68738	0.736611	0.0137793
2010	18139951	FBtr0332210 // kek1 // kekkon-1 // 34A1-34A1 // 34688 /// NM_078835 // kek1 // kekkon-1	kek1	FBtr0332210	0.161967	1.08168	1.85e-06	1.37842	0.364073	3.18184e-05
12985	18202342	FBtr0112669 // CG34404 // CG34404 gene product from transcript CG34404-RD // 88F1-88F1	CG34404	FBtr0112669	0.547276	-1.03906	0.00805184	-1.19525	0.755726	0.026211
5178	18158210	FBtr0112940 // CG3530 // CG3530 gene product from transcript CG3530-RC // 59D10-59D10 /	CG3530	FBtr0112940	0.62574	-1.02388	0.000453131	-1.20675	0.808841	0.00257252
9296	18181200	FBtr0301939 // Sfp78E // Seminal fluid protein 78E // 78E4-78E4 // 8674005 /// FBtr0333	Sfp78E	FBtr0301939	0.0883058	-1.28128	0.52424	-1.09496	0.243385	0.664594
598	18132430	FBtr0077949 // CG4341 // CG4341 gene product from transcript CG4341-RA // 21E2-21E2 //	CG4341	FBtr0077949	0.00841367	-1.24926	0.000138681	-1.41003	0.044999	0.00100961
6811	18167649	FBtr0333134 // CG14982 // CG14982 gene product from transcript CG14982-RC // 64A1-64A1	CG14982	FBtr0333134	0.00212192	-1.29932	8.96e-05	-1.42112	0.0154365	0.000710963
8588	18177666	NM_079311 // Rh7 // Rhodopsin 7 // 68F8-69A1 // 39389 /// FBtr0076020 // Rh7 // Rhodops	Rh7	NM_079311	0.0314328	-1.21601	1.62e-05	-1.55641	0.118898	0.000178419
7072	18169109	FBtr0075935 // Ent3 // Equilibrative nucleoside transporter 3 // 69E6-69E6 // 39461 ///	Ent3	FBtr0075935	0.316595	1.07463	0.429852	1.05819	0.551091	0.580414
2745	18144108	FBtr0081395 // CG9317 // CG9317 gene product from transcript CG9317-RA // 38E4-38E4 //	CG9317	FBtr0081395	0.726028	1.03278	0.000407997	-1.43505	0.867255	0.00236566
13573	18205761	NM_001272605 // rdgB // retinal degeneration B // 12C1-12C4|1-42.7 cM // 32340 /// NM_0	rdgB	NM_001272605	0.293849	-1.05073	0.00253819	-1.1644	0.526301	0.010284
10943	18190542	NM_176528 // P5CDh2 // delta-1-Pyrroline-5-carboxylate dehydrogenase 2 // 93F14-93F14 /	P5CDh2	NM_176528	0.539148	-1.08417	0.00128108	1.58552	0.750211	0.00592178
9920	18185009	FBtr0081744 // CG10086 // CG10086 gene product from transcript CG10086-RA // 84E1-84E1	CG10086	FBtr0081744	0.256842	1.18081	0.421547	1.12433	0.48684	0.572849
5708	18161310	FBtr0100495 // CG13430 // CG13430 gene product from transcript CG13430-RA // 57A5-57A5	CG13430	FBtr0100495	0.0724737	-1.07942	8.12e-05	-1.20486	0.211689	0.000656762
6713	18167039	FBtr0072619 // CG12038 // CG12038 gene product from transcript CG12038-RA // 61E1-61E1	CG12038	FBtr0072619	0.0415845	1.15972	0.369532	-1.06553	0.144598	0.521355
11004	18190834	FBtr0110808 // CG34114 // CG34114 gene product from transcript CG34114-RB // 86C15-86D1	CG34114	FBtr0110808	0.00417941	-1.27574	1.25e-05	-1.50488	0.0263893	0.000146045
3329	18147117	NM_057277 // Mal-A2 // Maltase A2 // 44D1-44D1 // 35825 /// FBtr0088747 // Mal-A2 // Ma	Mal-A2	NM_057277	0.368043	1.1437	0.437423	-1.12259	0.602709	0.587868
10333	18187092	FBtr0083789 // CG11391 // CG11391 gene product from transcript CG11391-RA // 92B2-92B2	CG11391	FBtr0083789	0.0266636	-1.27103	3.72e-06	-1.78308	0.105402	5.55008e-05
2901	18144981	FBtr0079304 // CG31910 // CG31910 gene product from transcript CG31910-RA // 27A2-27A2	CG31910	FBtr0079304	0.555534	-1.09488	0.0072191	1.54876	0.762033	0.0239889
12893	18201838	FBtr0303038 // p24-2 // p24-related-2 // 85E4-85E4 // 318890 /// FBtr0303039 // Unc-115	p24-2	FBtr0303038	0.976791	-1.00145	0.288413	-1.05481	0.990419	0.435434
2862	18144813	NM_165266 // CG31752 // CG31752 gene product from transcript CG31752-RB // 37B1-37B1 //	CG31752	NM_165266	0.782219	-1.04717	0.00338957	1.68983	0.898226	0.0129475
7458	18171060	NM_168410 // S-Lap3 // Sperm-Leucylaminopeptidase 3 // 67E3-67E4 // 326187 /// FBtr0076	S-Lap3	NM_168410	0.650981	-1.09209	0.071886	1.43239	0.826215	0.150003
1393	18136811	FBtr0080667 // CG31835 // CG31835 gene product from transcript CG31835-RA // 35B5-35B5	CG31835	FBtr0080667	0.675081	1.05219	3.15e-05	1.79506	0.838759	0.000307686
1665	18137905	FBtr0080667 // CG31835 // CG31835 gene product from transcript CG31835-RA // 35B5-35B5	CG31835	FBtr0080667	0.675081	1.05219	3.15e-05	1.79506	0.838759	0.000307686
5753	18161545	FBtr0302446 // CG13492 // CG13492 gene product from transcript CG13492-RD // 58A2-58A2	CG13492	FBtr0302446	0.0913286	-1.29351	0.04751	-1.35633	0.249442	0.108244
5062	18157322	NM_080377 // NaPi-T // Na[+]-dependent inorganic phosphate cotransporter // 51C5-51C5 /	NaPi-T	NM_080377	0.477423	-1.10266	0.0163903	-1.41185	0.702217	0.0466067
8931	18179439	FBtr0333892 // Syn1 // Syntrophin-like 1 // 78E6-78F1 // 40424 /// FBtr0310451 // Syn1	Syn1	FBtr0333892	0.00247428	-1.22585	5.49e-10	-1.72788	0.0174578	3.94748e-08
10053	18185663	NM_141796 // scpr-C // SCP-containing protein C // 86D8-86D8 // 41348 /// FBtr0082351 /	scpr-C	NM_141796	0.768451	1.06786	0.00426294	1.97764	0.89145	0.0156409
11844	18196029	NM_141545 // Obp85a // Odorant-binding protein 85a // 85A1-85A1 // 41006 /// FBtr008184	Obp85a	NM_141545	0.152109	-1.12393	0.986688	1.00134	0.349981	0.991121
7565	18171605	FBtr0078344 // CG32437 // CG32437 gene product from transcript CG32437-RA // 78C8-78C8	CG32437	FBtr0078344	0.254872	-1.21655	0.0193445	1.51721	0.484737	0.0531998
5481	18160117	FBtr0087652 // CG12464 // CG12464 gene product from transcript CG12464-RA // 50B5-50B6	CG12464	FBtr0087652	0.0552177	1.44486	0.000180134	2.19368	0.175309	0.00124214
10649	18188895	FBtr0330299 // CG11873 // CG11873 gene product from transcript CG11873-RB // 98F6-98F10	CG11873	FBtr0330299	0.779378	-1.01109	0.500555	-1.02696	0.89654	0.644437
11287	18192585	NM_001276097 // Acp98AB // Accessory gland-specific peptide 98AB // 98B1-98B1 // 127982	Acp98AB	NM_001276097	0.38421	-1.2079	0.972589	1.00744	0.618327	0.983171
5929	18162478	NM_166079 // Obp51a // Odorant-binding protein 51a // 51D8-51D8 // 246666 /// FBtr00874	Obp51a	NM_166079	0.436897	1.12738	0.00475442	-1.58895	0.667138	0.0170816
2902	18144984	FBtr0078096 // CG31921 // CG31921 gene product from transcript CG31921-RA // 21C1-21C1	CG31921	FBtr0078096	0.40226	-1.12767	0.00118727	1.65717	0.635287	0.00558623
13746	18206953	NM_001258548 // Adar // Adenosine deaminase acting on RNA // 2B9-2B9 // 31130 /// FBtr0	Adar	NM_001258548	1.45e-06	-1.25857	5.77e-06	-1.23525	4.24899e-05	7.92077e-05
9782	18184253	FBtr0082639 // hug // hugin // 87B15-87B15 // 41547 /// NM_079605 // hug // hugin // 87	hug	FBtr0082639	0.0721703	1.19306	0.608739	1.05026	0.210916	0.733705
7893	18173562	NM_001274812 // CG43638 // CG43638 gene product from transcript CG43638-RA // 68F1-68F1	CG43638	NM_001274812	0.501275	-1.11093	0.00135487	1.72349	0.7215	0.00618917
1152	18135394	FBtr0081037 // CG5758 // CG5758 gene product from transcript CG5758-RC // 36E5-36E5 //	CG5758	FBtr0081037	0.803569	1.01387	2.18e-05	-1.31549	0.909749	0.000227797
1378	18136738	FBtr0301019 // CG31760 // CG31760 gene product from transcript CG31760-RC // 33D2-33D2	CG31760	FBtr0301019	0.0315086	-1.17842	0.0135865	-1.21015	0.119075	0.0401083
8625	18177878	FBtr0075891 // CG11251 // CG11251 gene product from transcript CG11251-RA // 70A1-70A1	CG11251	FBtr0075891	0.878806	-1.02033	9.17e-06	2.0003	0.944923	0.000113993
5283	18158961	FBtr0088801 // CG12126 // CG12126 gene product from transcript CG12126-RA // 44C3-44C3	CG12126	FBtr0088801	0.130781	1.23405	1.26e-05	2.01915	0.317319	0.000146898
16070	18219547	---	NA	---	0.0930577	1.12429	0.209626	-1.09048	0.252559	0.343975
9524	18182528	FBtr0083784 // ort // ora transientless // 92A13-92A13|3-66.4 cM // 45910 /// NM_079682	ort	FBtr0083784	0.126278	-1.15316	0.0247571	-1.23866	0.310548	0.0644982
9452	18182114	FBtr0113751 // scro // scarecrow // --- // 3355151 /// NM_001015473 // scro // scarecro	scro	FBtr0113751	0.0226316	-1.20852	0.000872488	-1.33749	0.0935409	0.00435909
10698	18189171	FBtr0085618 // CG18404 // CG18404 gene product from transcript CG18404-RA // 99E3-99E3	CG18404	FBtr0085618	0.00672991	-1.74682	7.4e-09	-4.51426	0.0380607	3.36897e-07
10708	18189240	FBtr0085664 // CG9702 // CG9702 gene product from transcript CG9702-RA // 99F9-99F9 //	CG9702	FBtr0085664	0.455322	-1.10196	0.0577086	-1.28802	0.683503	0.12638
3627	18149168	NM_136397 // CG15236 // CG15236 gene product from transcript CG15236-RA // 42D4-42D6 //	CG15236	NM_136397	0.00263999	-1.31663	8.2e-07	-1.67655	0.018446	1.65849e-05
4550	18154185	FBtr0100076 // CG34021 // CG34021 gene product from transcript CG34021-RA // 48F10-48F1	CG34021	FBtr0100076	0.264854	1.17457	1.23e-05	2.08791	0.49507	0.000144121
4313	18152990	NM_080264 // Dip3 // Dorsal interacting protein 3 // 55B7-55B7 // 53579 /// FBtr0086734	Dip3	NM_080264	0.268417	-1.09275	0.404305	-1.06881	0.499955	0.556226
5151	18157985	FBtr0086149 // Trap1 // CG3152 gene product from transcript CG3152-RA // 42B2-42B2 // 3	Trap1	FBtr0086149	0.0676731	1.23126	0.157248	1.17265	0.201636	0.276246
6443	18165325	FBtr0305085 // Dab // Disabled // 73C1-73C1 // 39866 /// FBtr0330190 // Dab // Disabled	Dab	FBtr0305085	0.03128	1.13157	0.499378	-1.03816	0.118513	0.643369
5022	18157008	FBtr0087516 // phyl // phyllopod // 51A2-51A2 // 36606 /// NM_166055 // phyl // phyllop	phyl	FBtr0087516	2.06e-10	1.82071	8e-07	1.49033	2.11467e-08	1.63016e-05
7286	18170151	NM_168831 // Ssk // Snakeskin // 77A1-77A1 // 40207 /// FBtr0074820 // Ssk // Snakeskin	Ssk	NM_168831	0.00310464	1.2966	0.107358	1.14372	0.0209483	0.205886
14080	18208702	FBtr0073679 // tomosyn // CG17762 gene product from transcript CG17762-RI // 11B6-11B7	tomosyn	FBtr0073679	0.00126723	-1.19196	7.46e-05	-1.2536	0.0103574	0.000615893
2896	18144964	FBtr0079853 // CG31882 // CG31882 gene product from transcript CG31882-RA // 30C1-30C1	CG31882	FBtr0079853	0.0198846	-1.41943	0.0801346	1.29444	0.0850738	0.163699
15470	18216615	FBtr0077292 // CG15452 // CG15452 gene product from transcript CG15452-RA // 19E2-19E2	CG15452	FBtr0077292	0.568555	-1.11516	0.0887497	1.39421	0.769865	0.176957
12233	18198295	FBtr0083770 // CG3517 // CG3517 gene product from transcript CG3517-RA // 92A4-92A4 //	CG3517	FBtr0083770	0.621035	1.07008	5.26e-06	2.10588	0.805368	7.33792e-05
10564	18188431	FBtr0301147 // CG5890 // CG5890 gene product from transcript CG5890-RB // 96F5-96F5 //	CG5890	FBtr0301147	0.0453839	-1.17353	0.0926186	-1.14245	0.152765	0.183239
13942	18208043	FBtr0300019 // CG1402 // CG1402 gene product from transcript CG1402-RB // 7C1-7C1 // 31	CG1402	FBtr0300019	0.216903	-1.09135	0.171931	-1.10183	0.438583	0.296551
5822	18161876	FBtr0072022 // skpF // CG12227 gene product from transcript CG12227-RA // 59E1-59E1 //	skpF	FBtr0072022	0.942871	-1.00934	0.00013129	1.75356	0.975936	0.000967893
7342	18170472	FBtr0078429 // CG11249 // CG11249 gene product from transcript CG11249-RA // 78E3-78E3	CG11249	FBtr0078429	0.237187	-1.16229	0.00813018	1.42316	0.463621	0.0264344
1698	18138119	FBtr0303302 // CG42757 // CG42757 gene product from transcript CG42757-RA // 36C2-36C2	CG42757	FBtr0303302	0.719619	-1.03057	0.885008	-1.01219	0.863649	0.927967
1607	18137557	NM_001103622 // TrissinR // Trissin receptor // 25F5-26A1 // 33812 /// NM_135118 // Tri	TrissinR	NM_001103622	0.444456	1.03419	0.00352408	-1.14694	0.673951	0.0133705
3591	18148966	FBtr0072148 // alpha-catenin-related // alpha-catenin related // 60A14-60A14 // 49713 /	alpha-catenin-related	FBtr0072148	0.924202	-1.0074	0.0296029	-1.19149	0.966542	0.0743695
10355	18187210	NM_079690 // Or92a // Odorant receptor 92a // 92E13-92E13 // 42425 /// FBtr0083887 // O	Or92a	NM_079690	0.515294	1.05774	0.326397	-1.08878	0.732889	0.476133
11033	18190998	FBtr0304917 // CG34354 // CG34354 gene product from transcript CG34354-RA // 98C2-98C2	CG34354	FBtr0304917	0.180544	-1.10574	0.0311089	-1.18021	0.390983	0.0773081
13810	18207354	FBtr0305287 // CG11509 // CG11509 gene product from transcript CG11509-RA // 2B4-2B4 //	CG11509	FBtr0305287	0.0104337	-1.22427	0.0278263	-1.18684	0.0528165	0.0707256
8153	18175326	NM_176325 // Rgl // Ral guanine nucleotide exchange factor // 70C5-70C5 // 44115 /// FB	Rgl	NM_176325	0.0202052	1.09154	0.042714	1.07854	0.0861293	0.0994406
1304	18136269	NM_135717 // Pkd2 // Polycystic kidney disease gene-2 // 33E3-33E3 // 34651 /// FBtr008	Pkd2	NM_135717	0.363657	1.14109	0.000175389	1.84071	0.597685	0.00121765
13516	18205320	FBtr0074597 // Bx // Beadex // 17C3-17C4|1-59.4 cM // 32846 /// FBtr0330224 // Bx // Be	Bx	FBtr0074597	0.0995629	-1.08424	4.11e-05	-1.25531	0.264841	0.000379861
7775	18172736	NM_167885 // Psa // Puromycin sensitive aminopeptidase // 62A3-62A4 // 38175 /// FBtr00	Psa	NM_167885	0.254453	1.04789	3.04e-06	1.25726	0.48431	4.75277e-05
13555	18205610	FBtr0071320 // lz // lozenge // 8D5-8D6|1-27.7 cM // 31883 /// NM_078544 // lz // lozen	lz	FBtr0071320	0.0164384	1.21698	0.00199906	-1.29857	0.0738936	0.00845302
426	18131232	NM_205883 // Plc21C // Phospholipase C at 21C // 21B8-21C1 // 33204 /// FBtr0078050 //	Plc21C	NM_205883	0.53256	1.02599	0.100259	-1.07131	0.745621	0.195022
15605	18217320	FBtr0073671 // CG32652 // CG32652 gene product from transcript CG32652-RA // 11A9-11A9	CG32652	FBtr0073671	0.795335	-1.07895	0.628819	1.15235	0.905146	0.749659
14963	18214077	FBtr0077220 // lcs // la costa // 20A1-20A1 // 33120 /// NM_078712 // lcs // la costa /	lcs	FBtr0077220	0.397145	-1.13809	0.42646	-1.12908	0.630963	0.577746
15379	18216145	FBtr0074539 // CG12672 // CG12672 gene product from transcript CG12672-RA // 16F4-16F4	CG12672	FBtr0074539	0.37836	-1.05747	0.0086538	-1.19155	0.613388	0.0278375
8358	18176426	FBtr0073362 // CG7509 // CG7509 gene product from transcript CG7509-RA // 64B17-64B17 /	CG7509	FBtr0073362	0.00318162	-1.30451	1.66e-05	-1.52669	0.0213092	0.000181965
10954	18190616	FBtr0084611 // CG33340 // CG33340 gene product from transcript CG33340-RA // 95F15-95F1	CG33340	FBtr0084611	0.888184	-1.03969	0.447963	1.23495	0.949187	0.597672
12817	18201458	FBtr0083773 // CG31245 // CG31245 gene product from transcript CG31245-RA // 92A3-92A3	CG31245	FBtr0083773	0.405678	1.13323	0.000100027	1.93834	0.638522	0.000778932
399	18131095	FBtr0332184 // Shaw // Shaker cognate w // 24C1-24C2 // 33599 /// NM_001273071 // Shaw	Shaw	FBtr0332184	0.750728	1.0163	0.0248341	-1.12634	0.882844	0.0646273
7396	18170728	FBtr0072983 // Jafrac2 // thioredoxin peroxidase 2 // 63A3-63A3 // 53577 /// NM_167971	Jafrac2	FBtr0072983	0.0923701	-1.12299	0.0277769	1.16674	0.251277	0.0706411
1139	18135338	FBtr0303301 // beat-IIIa // CG12621 gene product from transcript CG12621-RD // 36C1-36C	beat-IIIa	FBtr0303301	0.909328	-1.00926	0.0383476	-1.18968	0.959037	0.0911607
8593	18177688	FBtr0301071 // CG4328 // CG4328 gene product from transcript CG4328-RB // 69A5-69A5 //	CG4328	FBtr0301071	0.648419	-1.0332	0.410684	1.06094	0.824645	0.562398
766	18133344	FBtr0077619 // CG2975 // CG2975 gene product from transcript CG2975-RA // 23B4-23B4 //	CG2975	FBtr0077619	0.914337	1.01266	0.086847	1.22772	0.960981	0.173843
13893	18207756	FBtr0305346 // CG5937 // CG5937 gene product from transcript CG5937-RD // 5D2-5D3 // 31	CG5937	FBtr0305346	0.846118	-1.01536	0.169572	-1.1158	0.928504	0.293225
10552	18188368	FBtr0084880 // CG5111 // CG5111 gene product from transcript CG5111-RA // 96E2-96E2 //	CG5111	FBtr0084880	0.795576	-1.04115	0.00883556	1.5392	0.905146	0.0283328
4908	18156187	FBtr0086242 // exu // exuperantia // 57A9-57A10|2-93 cM // 37345 /// NM_166410 // exu /	exu	FBtr0086242	0.118036	1.28486	0.000712744	1.79652	0.296671	0.00371137
509	18131836	FBtr0089699 // Tim17b2 // Translocase inner membrane 17 // 35D2-35D2 // 44381 /// NM_08	Tim17b2	FBtr0089699	2.99e-06	2.58457	5.3e-11	5.12591	7.7342e-05	5.96597e-09
1227	18135768	FBtr0081425 // CG14402 // CG14402 gene product from transcript CG14402-RA // 38F2-38F2	CG14402	FBtr0081425	0.191886	-1.18335	0.00186501	1.53604	0.407224	0.00797712
2186	18141034	FBtr0078099 // CG11912 // CG11912 gene product from transcript CG11912-RA // 21B8-21B8	CG11912	FBtr0078099	0.0236189	1.52984	0.149268	1.30229	0.0964975	0.265629
1319	18136344	FBtr0079144 // bchs // blue cheese // 26A1-26A1 // 33819 /// NM_135124 // bchs // blue	bchs	FBtr0079144	2.72e-05	-1.29146	1.44e-07	-1.42141	0.000484142	3.99044e-06
15632	18217475	FBtr0304870 // CG32720 // CG32720 gene product from transcript CG32720-RB // 7B3-7B3 //	CG32720	FBtr0304870	0.643509	-1.06595	0.000135185	1.8132	0.820839	0.00099079
6726	18167122	FBtr0072692 // CG9168 // CG9168 gene product from transcript CG9168-RA // 62A1-62A1 //	CG9168	FBtr0072692	0.248092	1.1489	0.0818688	1.23621	0.477051	0.166492
980	18134498	FBtr0079829 // CG31883 // CG31883 gene product from transcript CG31883-RA // 30B10-30B1	CG31883	FBtr0079829	0.276441	-1.18566	0.0574974	-1.35425	0.508059	0.12602
2798	18144431	FBtr0077748 // Cyp309a2 // CG18559 gene product from transcript CG18559-RA // 23A1-23A1	Cyp309a2	FBtr0077748	0.000121034	1.34075	5.29e-08	1.60852	0.00161267	1.74431e-06
6652	18166655	FBtr0333949 // CG7927 // CG7927 gene product from transcript CG7927-RC // 66B6-66B6 //	CG7927	FBtr0333949	0.00641962	-1.10532	0.391061	1.03025	0.036693	0.542625
12715	18200803	FBtr0273255 // CG18747 // CG18747 gene product from transcript CG18747-RB // 84E1-84E1	CG18747	FBtr0273255	0.209329	-1.17443	8.34e-05	-1.76379	0.428906	0.00067123
13536	18205503	FBtr0071446 // flw // flapwing // 9B14-9C1|1-31 cM // 44289 /// NM_167229 // flw // fla	flw	FBtr0071446	0.567224	-1.02249	0.00164114	-1.14188	0.769084	0.0072045
3491	18148320	NM_001274230 // TM4SF // Transmembrane 4 superfamily // 60A7-60A7 // 37786 /// FBtr0330	TM4SF	NM_001274230	0.0306789	1.18144	0.403531	1.06434	0.116886	0.555489
3151	18146321	FBtr0302991 // CG42710 // CG42710 gene product from transcript CG42710-RA // 29F1-29F1	CG42710	FBtr0302991	0.975713	-1.00395	4.9e-06	2.03074	0.990089	6.90655e-05
14962	18214065	NM_001031897 // mei-218 // meiotic 218 // 15E5-15E5 // 3772646 /// FBtr0100640 // mei-2	mei-218	NM_001031897	0.929165	1.00742	3.7e-05	1.48683	0.96878	0.000350705
2189	18141045	FBtr0078093 // CG4213 // CG4213 gene product from transcript CG4213-RA // 21C2-21C2 //	CG4213	FBtr0078093	0.0235017	-1.19939	0.0625083	1.15887	0.0961631	0.134652
12053	18197293	FBtr0082917 // CG9920 // CG9920 gene product from transcript CG9920-RA // 88A8-88A8 //	CG9920	FBtr0082917	0.862204	-1.02915	0.247933	1.2133	0.937193	0.389261
4450	18153672	FBtr0071888 // CG30274 // CG30274 gene product from transcript CG30274-RA // 59B2-59B2	CG30274	FBtr0071888	0.73382	-1.03285	0.000126003	-1.51067	0.872417	0.000936957
6223	18164151	FBtr0300043 // CG42392 // CG42392 gene product from transcript CG42392-RA // 53D7-53D7	CG42392	FBtr0300043	0.240501	-1.07419	0.00490964	-1.19862	0.46765	0.0175466
8017	18174464	NM_079394 // Galpha73B // G protein alpha 73B // 73B5-73B5 // 39861 /// FBtr0075354 //	Galpha73B	NM_079394	0.0489805	-1.18445	0.00274329	-1.30849	0.161315	0.0109106
5375	18159522	FBtr0088246 // CG12344 // CG12344 gene product from transcript CG12344-RA // 47C1-47C2	CG12344	FBtr0088246	0.805356	1.01541	0.932777	1.00525	0.910854	0.958239
1284	18136137	FBtr0077973 // CG5011 // CG5011 gene product from transcript CG5011-RB // 21F2-21F2 //	CG5011	FBtr0077973	0.234283	1.21613	0.761549	-1.05062	0.459943	0.845981
1350	18136554	NM_001258953 // pog // poor gastrulation // 25B1-25B1 // 33690 /// FBtr0304910 // pog /	pog	NM_001258953	0.0410283	-1.19146	0.0217128	-1.21971	0.143458	0.0580397
15524	18216882	FBtr0300326 // CG13375 // CG13375 gene product from transcript CG13375-RA // 1A1-1A1 //	CG13375	FBtr0300326	0.147269	-1.12563	0.00111502	1.3312	0.343569	0.00530087
376	18130920	NM_134429 // Ca-alpha1D // Ca[2+]-channel protein alpha[[1]] subunit D // 35E5-35E6 //	Ca-alpha1D	NM_134429	0.703319	-1.01721	0.0106663	-1.1282	0.856173	0.0330665
4836	18155728	FBtr0306936 // CG43340 // CG43340 gene product from transcript CG43340-RH // 43E6-43E7	CG43340	FBtr0306936	0.0825453	-1.08523	6.38e-08	-1.3793	0.232014	2.02991e-06
642	18132691	FBtr0080735 // CG4161 // CG4161 gene product from transcript CG4161-RA // 35D2-35D2 //	CG4161	FBtr0080735	0.880487	1.02228	0.000354584	1.79116	0.945582	0.00212152
157	18130295	---	NA	---	6.76e-14	-15.1917	4.12e-21	-137.276	2.29868e-11	9.60666e-18
10483	18187968	FBtr0084600 // CG13611 // CG13611 gene product from transcript CG13611-RA // 95F8-95F9	CG13611	FBtr0084600	0.914263	-1.01562	0.000334595	1.77806	0.960981	0.00202694
7374	18170616	FBtr0078534 // CG14448 // CG14448 gene product from transcript CG14448-RA // 80A2-80A2	CG14448	FBtr0078534	0.404862	-1.10192	0.000150673	1.64219	0.638314	0.00108196
13856	18207561	FBtr0070750 // CG4198 // CG4198 gene product from transcript CG4198-RA // 4F4-4F5 // 31	CG4198	FBtr0070750	0.9896	1.00204	0.00942527	1.53675	0.995656	0.0298196
3076	18145855	FBtr0273183 // CG42231 // CG42231 gene product from transcript CG42231-RA // 35F1-35F12	CG42231	FBtr0273183	0.802364	1.01331	0.190181	1.07266	0.908971	0.319591
12891	18201822	FBtr0084288 // CG33099 // CG33099 gene product from transcript CG33099-RA // 94B2-94B2	CG33099	FBtr0084288	0.41024	-1.07675	0.0621982	-1.18695	0.642542	0.134108
8667	18178054	FBtr0075669 // Rpn12R // CG11552 gene product from transcript CG11552-RA // 71B2-71B2 /	Rpn12R	FBtr0075669	0.061539	-1.27622	0.000559299	1.62186	0.189018	0.00304093
7783	18172806	FBtr0302557 // Tsp66A // Tetraspanin 66A // 66A2-66A2 // 38836 /// FBtr0302558 // CG426	Tsp66A	FBtr0302557	0.508715	-1.09747	0.000177737	1.80805	0.727052	0.00122873
7784	18172823	FBtr0302557 // Tsp66A // Tetraspanin 66A // 66A2-66A2 // 38836 /// FBtr0302558 // CG426	Tsp66A	FBtr0302557	0.508715	-1.09747	0.000177737	1.80805	0.727052	0.00122873
15789	18218175	NM_206675 // alpha-Man-I // alpha Mannosidase I // 9B6-9B6|1-30.1 cM // 31957 /// FBtr0	alpha-Man-I	NM_206675	0.984717	-1.00068	0.00100206	-1.13599	0.994116	0.00486051
11401	18193447	NM_057400 // ss // spineless // 89B14-89B15|3-58.5 cM // 41988 /// FBtr0083318 // ss //	ss	NM_057400	0.00150713	-1.22541	1.04e-05	-1.35887	0.0118266	0.000125647
14567	18211661	NM_001258556 // east // enhanced adult sensory threshold // 2C2-2B17|1-0.16 cM // 46006	east	NM_001258556	0.166638	-1.04996	4.29e-06	-1.21099	0.370201	6.20207e-05
5655	18161019	FBtr0086643 // CG18609 // CG18609 gene product from transcript CG18609-RA // 55E11-55E1	CG18609	FBtr0086643	0.763925	-1.06169	0.715538	1.07536	0.88923	0.814679
15611	18217347	NM_167261 // Rab9Fb // Rab at 9Fb // 9F13-9F13 // 32029 /// FBtr0073401 // Rab9Fb // Ra	Rab9Fb	NM_167261	0.810642	1.03422	0.000128389	1.8383	0.913087	0.000952097
11281	18192564	FBtr0301485 // Nrx-1 // Neurexin 1 // 94A16-94B1 // 42646 /// NR_048463 // mir-4952 //	Nrx-1	FBtr0301485	0.0602713	-1.13851	0.0107663	-1.19785	0.186599	0.0333007
15298	18215679	FBtr0307503 // CG15599 // CG15599 gene product from transcript CG15599-RC // 13E6-13E7	CG15599	FBtr0307503	0.00141763	1.51683	2.01e-05	1.81711	0.0112926	0.00021345
12500	18199737	FBtr0085151 // CG6283 // CG6283 gene product from transcript CG6283-RA // 97D14-97D14 /	CG6283	FBtr0085151	0.47747	-1.14834	0.560641	-1.1198	0.702223	0.696566
14734	18212630	FBtr0300106 // oc // ocelliless // 7F10-8A1|1-23.1 cM // 31802 /// FBtr0331737 // oc //	oc	FBtr0300106	0.666341	1.03859	0.0134519	-1.2561	0.835327	0.0397685
11963	18196760	FBtr0082531 // CG17360 // CG17360 gene product from transcript CG17360-RA // 86E18-86F7	CG17360	FBtr0082531	0.00514947	-1.14872	0.0147773	-1.12626	0.0308439	0.0428563
14314	18209985	NM_167700 // Obp19a // Odorant-binding protein 19a // 19D1-19D1 // 33037 /// FBtr030716	Obp19a	NM_167700	0.116212	1.11665	0.000605784	-1.29771	0.293488	0.00324503
15259	18215501	FBtr0100150 // CG14408 // CG14408 gene product from transcript CG14408-RA // 12F5-12F5	CG14408	FBtr0100150	0.114461	-1.09024	0.0208088	-1.13834	0.290695	0.0563252
8163	18175385	FBtr0304985 // jim // CG11352 gene product from transcript CG11352-RC // 80A2-80A4 // 4	jim	FBtr0304985	0.135761	-1.06285	9.04e-06	-1.23491	0.325436	0.00011272
15740	18217869	FBtr0112523 // inaF-C // CG34321 gene product from transcript CG34321-RA // 10D8-10E1 /	inaF-C	FBtr0112523	0.0992073	-1.19169	0.000169955	-1.55416	0.264171	0.00118903
6209	18164010	FBtr0299573 // CG42260 // CG42260 gene product from transcript CG42260-RB // 59B1-59B1	CG42260	FBtr0299573	0.41978	-1.06819	0.834197	1.01718	0.650741	0.896442
11687	18195291	FBtr0083304 // decay // death executioner caspase related to Apopain/Yama // 89B18-89B1	decay	FBtr0083304	0.341481	1.15205	0.744144	-1.04943	0.576565	0.833511
10577	18188490	FBtr0085006 // CG5432 // CG5432 gene product from transcript CG5432-RA // 97B2-97B2 //	CG5432	FBtr0085006	0.721715	-1.07043	0.00693518	1.72922	0.864871	0.0232149
10560	18188417	FBtr0084903 // CG17770 // CG17770 gene product from transcript CG17770-RA // 96F3-96F3	CG17770	FBtr0084903	0.507637	1.0865	0.00029467	1.65636	0.72617	0.00183244
9146	18180458	FBtr0078325 // CG33285 // CG33285 gene product from transcript CG33285-RA // 78B1-78B1	CG33285	FBtr0078325	0.851672	-1.01744	3.24e-06	1.68046	0.931639	4.96557e-05
2171	18140944	FBtr0081450 // Spn38F // Serpin 38F // 38F1-38F2 // 49806 /// NM_080217 // Spn38F // Se	Spn38F	FBtr0081450	0.1853	-1.19526	0.00231522	1.54812	0.397851	0.00951625
14424	18210586	NR_037725 // CR32690 // ncRNA // 9B3-9B3 // 10178944	CR32690	NR_037725	0.76316	-1.05486	0.132849	1.3115	0.889037	0.242818
575	18132271	FBtr0079261 // epsilonCOP // CG9543 gene product from transcript CG9543-RA // 26D9-26D9	epsilonCOP	FBtr0079261	0.0326673	1.18482	0.711899	-1.02867	0.122041	0.812447
9876	18184791	FBtr0078598 // Osi8 // Osiris 8 // 83E2-83E2 // 40762 /// NM_141370 // Osi8 // Osiris 8	Osi8	FBtr0078598	0.0761987	-1.18951	0.0195869	-1.26225	0.219428	0.0537033
13071	18202995	FBtr0084894 // ymp // yellow-emperor // 96E4-96E4 // 43088 /// FBtr0084895 // ymp // ye	ymp	FBtr0084894	0.914516	-1.01852	0.0137446	1.55745	0.960981	0.0404872
5750	18161530	FBtr0071675 // CG17922 // CG17922 gene product from transcript CG17922-RA // 57F9-57F9	CG17922	FBtr0071675	0.259428	1.07427	0.00201623	-1.23403	0.489354	0.00851019
2996	18145437	FBtr0304045 // CG34051 // CG34051 gene product from transcript CG34051-RB // 38A8-38A8	CG34051	FBtr0304045	0.117217	-1.27217	0.532853	1.0988	0.295249	0.672223
11303	18192691	FBtr0330274 // cpo // couch potato // 90D1-90E1 // 45840 /// NM_001014632 // cpo // cou	cpo	FBtr0330274	0.00014103	-1.20303	8.78e-06	-1.25391	0.00181537	0.000110236
4582	18154273	NM_137480 // GstE2 // Glutathione S transferase E2 // 55C6-55C7 // 37107 /// FBtr008667	GstE2	NM_137480	0.00586197	-1.19102	2.22e-07	-1.47729	0.0341775	5.73336e-06
10732	18189362	FBtr0113315 // CG1638 // CG1638 gene product from transcript CG1638-RB // 100C7-100C7 /	CG1638	FBtr0113315	0.0546108	1.26177	1.56e-08	2.41379	0.173934	6.2561e-07
14479	18210875	FBtr0112531 // Diedel3 // Diedel 3 // 18A2-18A2 // 50358 /// NM_001103558 // Diedel3 //	Diedel3	FBtr0112531	0.109917	1.26765	0.000145996	-1.86562	0.282574	0.00105674
10809	18189808	NM_169147 // Pif2 // PFTAIRE-interacting factor 2 // 83F1-83F1 // 170876 /// FBtr008167	Pif2	NM_169147	0.486332	1.12336	7.88e-05	2.11778	0.708679	0.000641483
7444	18170978	FBtr0332818 // CG32052 // CG32052 gene product from transcript CG32052-RC // 67C8-67C9	CG32052	FBtr0332818	0.698759	1.03451	0.970811	-1.00321	0.853084	0.981758
11614	18194859	NM_079930 // Oamb // Octopamine receptor in mushroom bodies // 92F6-92F8 // 43982 /// N	Oamb	NM_079930	0.253766	1.08519	0.153559	-1.10833	0.483479	0.271263
10189	18186402	FBtr0083026 // CG3987 // CG3987 gene product from transcript CG3987-RA // 88E2-88E2 //	CG3987	FBtr0083026	0.000535844	-1.68849	7.2e-08	-2.58821	0.00525604	2.25997e-06
14609	18211850	NR_047778 // CR43279 // ncRNA // 7B3-7B3 // 12797948	CR43279	NR_047778	0.416506	-1.23316	0.503926	1.18778	0.647455	0.647491
4905	18156157	NM_165463 // EcR // Ecdysone receptor // 42A9-42A12 // 35540 /// FBtr0086010 // EcR //	EcR	NM_165463	0.335102	-1.04269	6.58e-05	-1.21744	0.570514	0.000557626
6315	18164663	FBtr0304891 // CG43103 // CG43103 gene product from transcript CG43103-RA // 54A1-54A1	CG43103	FBtr0304891	5.84e-06	-1.83702	3.81e-06	-1.86784	0.000136172	5.65849e-05
14385	18210340	FBtr0077183 // CG32523 // CG32523 gene product from transcript CG32523-RA // 19F2-19F2	CG32523	FBtr0077183	0.0556246	1.22883	0.470318	-1.07868	0.17623	0.618034
5943	18162573	FBtr0088196 // metro // menage a trois // 47E1-47E1 // 36176 /// NM_136798 // metro //	metro	FBtr0088196	0.00132862	-1.24002	0.000124559	-1.30641	0.0107622	0.000929183
3129	18146234	FBtr0301799 // CG42597 // CG42597 gene product from transcript CG42597-RA // 40E1-40E1	CG42597	FBtr0301799	0.0689541	-1.35029	0.0984538	1.312	0.204475	0.19252
6983	18168689	FBtr0076389 // CG18180 // CG18180 gene product from transcript CG18180-RA // 67C3-67C3	CG18180	FBtr0076389	0.482345	-1.15925	0.012753	-1.73214	0.705846	0.0381515
4074	18151720	FBtr0086329 // CG8517 // CG8517 gene product from transcript CG8517-RA // 56E2-56E2 //	CG8517	FBtr0086329	0.653319	-1.09783	0.0176609	1.67491	0.827249	0.0493429
13118	18203239	NR_048502 // mir-1001 // mir-1001 stem loop // 98A14-98A14 // 12798277 /// FBtr0304414	mir-1001	NR_048502	0.169896	-1.10689	0.0226328	-1.18931	0.375446	0.0599788
1656	18137872	FBtr0079005 // SP555 // CG14041 gene product from transcript CG14041-RB // 25C1-25C1 //	SP555	FBtr0079005	0.0292233	-1.13886	0.170672	-1.08303	0.112789	0.294722
1658	18137879	FBtr0079005 // SP555 // CG14041 gene product from transcript CG14041-RB // 25C1-25C1 //	SP555	FBtr0079005	0.0292233	-1.13886	0.170672	-1.08303	0.112789	0.294722
2700	18143877	FBtr0081173 // CG17572 // CG17572 gene product from transcript CG17572-RA // 37B13-37B1	CG17572	FBtr0081173	0.495665	1.05372	0.0186393	-1.20737	0.716846	0.0515908
9728	18183884	FBtr0089684 // CRMP // Collapsin Response Mediator Protein // 83B2-83B2 // 40675 /// FB	CRMP	FBtr0089684	0.147304	-1.08304	0.000378937	-1.23859	0.343569	0.00223528
9464	18182191	FBtr0333869 // CG40178 // CG40178 gene product from transcript CG40178-RA // --- // 335	CG40178	FBtr0333869	0.197501	-1.07272	0.0517637	1.11386	0.414094	0.115881
9007	18179778	FBtr0091954 // BG642312 // CG33943 gene product from transcript CG33943-RB // 65A10-65A	BG642312	FBtr0091954	0.23928	-1.31369	0.0212122	-1.73667	0.465942	0.0572041
15070	18214569	FBtr0071063 // CG15035 // CG15035 gene product from transcript CG15035-RA // 7B2-7B2 //	CG15035	FBtr0071063	0.512826	-1.13273	0.034511	1.51632	0.73046	0.0840855
4809	18155617	FBtr0305124 // CG43123 // CG43123 gene product from transcript CG43123-RA // 43B2-43B2	CG43123	FBtr0305124	0.811724	-1.03608	0.397901	1.13482	0.913343	0.549872
12897	18201875	FBtr0081940 // CG33189 // CG33189 gene product from transcript CG33189-RA // 85B1-85B1	CG33189	FBtr0081940	0.753983	-1.02316	1.39e-06	1.53917	0.884404	2.54631e-05
10343	18187155	FBtr0083823 // CG4783 // CG4783 gene product from transcript CG4783-RA // 92B9-92B9 //	CG4783	FBtr0083823	0.0933582	1.3258	0.117496	1.29991	0.253089	0.221222
15592	18217258	FBtr0074025 // CG32588 // CG32588 gene product from transcript CG32588-RA // 13B3-13B3	CG32588	FBtr0074025	0.558176	1.08593	1.91e-05	2.01758	0.763454	0.000204829
2916	18145062	FBtr0081490 // CG31988 // CG31988 gene product from transcript CG31988-RA // 39B1-39B2	CG31988	FBtr0081490	0.832736	-1.05947	0.641962	1.13582	0.923201	0.759173
6453	18165384	NM_079407 // Grd // Glycine receptor // 75A3-75A4 // 39984 /// FBtr0075139 // Grd // Gl	Grd	NM_079407	0.570993	-1.04743	0.87894	-1.0125	0.771846	0.923944
14831	18213204	NM_079950 // Ag5r2 // Antigen 5-related 2 // 12F4-12F4 // 44079 /// FBtr0073938 // Ag5r	Ag5r2	NM_079950	0.00097419	1.62882	0.0495189	-1.31486	0.00849398	0.111881
10128	18186032	FBtr0082698 // CG11656 // CG11656 gene product from transcript CG11656-RA // 87D8-87D8	CG11656	FBtr0082698	0.123767	1.29637	0.00225472	1.72676	0.305524	0.00931213
10454	18187805	FBtr0084433 // beat-IV // CG10152 gene product from transcript CG10152-RB // 95A2-95A2	beat-IV	FBtr0084433	0.418784	-1.07012	0.0191969	-1.22669	0.649624	0.0528473
14504	18211100	FBtr0299513 // CG42249 // CG42249 gene product from transcript CG42249-RC // 10A4-10A4	CG42249	FBtr0299513	0.00338709	1.37206	0.319891	-1.106	0.022319	0.469242
12702	18200750	FBtr0078657 // CG11373 // CG11373 gene product from transcript CG11373-RA // 83D1-83D1	CG11373	FBtr0078657	0.863938	-1.02044	1.45e-05	1.82453	0.937747	0.000163672
12779	18201204	FBtr0273357 // CG31105 // CG31105 gene product from transcript CG31105-RB // 96B1-96B1	CG31105	FBtr0273357	0.00968784	-1.27328	0.0700617	1.17871	0.0498188	0.147118
613	18132518	FBtr0080550 // CG7953 // CG7953 gene product from transcript CG7953-RA // 34D7-34D8 //	CG7953	FBtr0080550	0.342655	-1.11535	0.0209595	-1.31727	0.57777	0.0566486
1187	18135558	FBtr0081198 // CG17349 // CG17349 gene product from transcript CG17349-RA // 37D3-37D3	CG17349	FBtr0081198	0.0225026	1.43082	5.25e-07	2.5591	0.0932438	1.17064e-05
9058	18180025	NM_168828 // Csas // CMP-sialic acid synthase // 76D8-76D8 // 317923 /// FBtr0074911 //	Csas	NM_168828	0.893758	-1.0109	0.000209413	-1.40209	0.952221	0.00139854
12538	18199969	FBtr0085319 // CG10011 // CG10011 gene product from transcript CG10011-RA // 98D6-98D7	CG10011	FBtr0085319	0.0930801	1.08187	0.00701294	1.14013	0.252577	0.0234224
3741	18149835	FBtr0088409 // CG2269 // CG2269 gene product from transcript CG2269-RD // 46E4-46E4 //	CG2269	FBtr0088409	0.0299859	-1.16916	0.00356308	-1.24198	0.114889	0.0134903
13265	18204117	FBtr0310541 // CG11360 // CG11360 gene product from transcript CG11360-RC // 102D4-102D	CG11360	FBtr0310541	0.0614115	-1.10381	0.000753185	-1.20948	0.188804	0.00387929
1361	18136627	FBtr0085931 // CG31693 // CG31693 gene product from transcript CG31693-RA // 40D3-40D3	CG31693	FBtr0085931	0.255649	-1.19633	0.0474967	1.37635	0.485655	0.108234
12956	18202203	FBtr0333927 // CG34127 // CG34127 gene product from transcript CG34127-RC // 84D10-84D1	CG34127	FBtr0333927	0.437913	-1.06187	0.896372	1.01008	0.668064	0.936238
3918	18150817	FBtr0306569 // CG12963 // CG12963 gene product from transcript CG12963-RL // 52A11-52A1	CG12963	FBtr0306569	0.0164644	-1.30796	0.256824	-1.13008	0.0739901	0.399951
13673	18206522	NM_166990 // Crg-1 // Circadianly Regulated Gene // 3F1-3F2 // 43900 /// FBtr0070599 //	Crg-1	NM_166990	0.0670332	1.17831	0.239625	-1.10921	0.200168	0.37954
7353	18170514	FBtr0078472 // CG14562 // CG14562 gene product from transcript CG14562-RB // 79A4-79A4	CG14562	FBtr0078472	0.0397696	-1.10878	5.3e-05	-1.25277	0.140545	0.000468616
15880	18218833	NM_001258680 // Hk // Hyperkinetic // 9B5-9B5|1-30.5 cM // 31955 /// NM_001258684 // Hk	Hk	NM_001258680	0.000273268	-1.38163	0.000704772	-1.34488	0.00313883	0.00367635
3373	18147478	NM_165925 // Galpha49B // G protein alpha49B // 49B8-49B9 // 36384 /// FBtr0304955 // G	Galpha49B	NM_165925	0.134791	-1.06472	0.0157923	-1.10992	0.324253	0.0452373
5400	18159655	FBtr0113066 // tou // toutatis // 48A1-48A3 // 36241 /// NM_001103800 // tou // toutati	tou	FBtr0113066	0.719144	-1.01547	0.00233251	-1.15061	0.86351	0.00957044
2772	18144303	FBtr0079816 // lectin-30A // CG17011 gene product from transcript CG17011-RA // 30A6-30	lectin-30A	FBtr0079816	2.99e-05	-2.0618	0.00450723	-1.5741	0.000523635	0.0163651
12757	18201058	FBtr0085579 // CG31030 // CG31030 gene product from transcript CG31030-RB // 99E1-99E1	CG31030	FBtr0085579	7.5e-06	-1.58605	0.00013983	-1.45242	0.000168146	0.00101707
1150	18135390	FBtr0081033 // CG5755 // CG5755 gene product from transcript CG5755-RA // 36E4-36E4 //	CG5755	FBtr0081033	0.129344	-1.32448	0.167154	1.29062	0.315097	0.289997
15801	18218265	FBtr0299898 // CG42343 // CG42343 gene product from transcript CG42343-RF // 20A1-20A1	CG42343	FBtr0299898	0.311659	-1.08849	0.0267149	-1.21139	0.546684	0.0685598
6660	18166700	FBtr0076683 // fan // farinelli // 66B6-66B6 // 43926 /// NM_079918 // fan // farinelli	fan	FBtr0076683	0.261691	1.16967	0.0010979	1.63783	0.492428	0.00523362
15289	18215643	FBtr0074014 // CG9164 // CG9164 gene product from transcript CG9164-RC // 13C1-13C1 //	CG9164	FBtr0074014	0.0432722	-1.15841	0.0335085	-1.16794	0.148599	0.0821703
11495	18194055	NM_057642 // Obp84a // Odorant-binding protein 84a // 84D3-84D3 // 40874 /// NM_0011042	Obp84a	NM_057642	3.96e-07	1.79208	0.00046061	1.4291	1.41125e-05	0.00260863
6991	18168741	NM_079288 // Ilp2 // Insulin-like peptide 2 // 67C8-67C8 // 39150 /// FBtr0076329 // Il	Ilp2	NM_079288	0.000352725	-1.51433	3.06e-05	-1.65586	0.00380766	0.000301602
13591	18205969	FBtr0073821 // Yp3 // Yolk protein 3 // 12C1-12C1|1-44 cM // 32339 /// NM_078593 // Yp3	Yp3	FBtr0073821	0.613267	-1.04856	0.000400622	-1.44542	0.800424	0.00233215
5482	18160119	FBtr0087651 // CG6209 // CG6209 gene product from transcript CG6209-RA // 50B9-50B9 //	CG6209	FBtr0087651	0.755867	-1.05571	0.0029484	1.7468	0.885495	0.0115378
10329	18187068	FBtr0083779 // CG17752 // CG17752 gene product from transcript CG17752-RA // 92A10-92A1	CG17752	FBtr0083779	0.0240919	-1.50906	0.245317	-1.22808	0.0977754	0.386232
5872	18162143	FBtr0306137 // CG4612 // CG4612 gene product from transcript CG4612-RC // 60D3-60D4 //	CG4612	FBtr0306137	0.178023	-1.05718	0.000169432	-1.18824	0.387581	0.00118639
15209	18215245	FBtr0333154 // CG43921 // CG43921 gene product from transcript CG43921-RA // 11B1-11B1	CG43921	FBtr0333154	0.04762	-1.16355	0.00179629	-1.2851	0.157722	0.00773386
1138	18135335	FBtr0332225 // CG12620 // CG12620 gene product from transcript CG12620-RB // 36B8-36B8	CG12620	FBtr0332225	0.635378	1.07466	0.00463296	1.58232	0.815538	0.0167336
11083	18191342	FBtr0299575 // CG42261 // CG42261 gene product from transcript CG42261-RB // 96F9-96F9	CG42261	FBtr0299575	0.0986617	1.14886	0.0132881	-1.23871	0.263216	0.0393698
10049	18185651	FBtr0082336 // CG4706 // CG4706 gene product from transcript CG4706-RA // 86D4-86D4 //	CG4706	FBtr0082336	0.498656	1.14102	0.00309608	1.85568	0.719062	0.0120005
10569	18188457	FBtr0084948 // CG14540 // CG14540 gene product from transcript CG14540-RA // 96F8-96F8	CG14540	FBtr0084948	0.954815	-1.01017	0.00390325	1.73775	0.980701	0.0145388
1068	18134974	FBtr0080253 // CG4983 // CG4983 gene product from transcript CG4983-RA // 32F4-32F4 //	CG4983	FBtr0080253	0.23683	1.24943	9.6e-05	2.28465	0.463272	0.000753323
11921	18196508	FBtr0082317 // CG14689 // CG14689 gene product from transcript CG14689-RA // 86C4-86C4	CG14689	FBtr0082317	0.465289	1.09907	5.17e-06	2.01846	0.691167	7.23711e-05
8628	18177888	FBtr0075863 // Poc1 // Proteome of centrioles 1 // 70A8-70A8 // 39502 /// NM_140383 //	Poc1	FBtr0075863	0.31104	1.11401	0.00018683	1.55969	0.546068	0.00128182
11418	18193572	NM_079530 // Mst84Dc // Male-specific RNA 84Dc // 84D5-84D5 // 40887 /// NM_001104231 /	Mst84Dc	NM_079530	0.946542	-1.01719	0.00328867	2.23208	0.977504	0.0126182
6179	18163813	FBtr0112596 // CG34371 // CG34371 gene product from transcript CG34371-RA // 59D1-59D2	CG34371	FBtr0112596	0.724816	-1.02421	0.00141761	-1.26617	0.866572	0.00642203
10138	18186099	FBtr0082740 // CG8774 // CG8774 gene product from transcript CG8774-RB // 87E4-87E5 //	CG8774	FBtr0082740	0.0428909	-1.26835	0.0104559	-1.35916	0.1476	0.0325503
339	18130724	FBtr0081412 // cad // caudal // 38E9-38E10 // 35341 /// NM_057606 // cad // caudal // 3	cad	FBtr0081412	0.539323	1.08884	0.513648	1.09483	0.750263	0.654873
12156	18197870	FBtr0083414 // m-cup // mann-cup // 89F1-89F1 // 42076 /// NM_142350 // m-cup // mann-c	m-cup	FBtr0083414	0.028566	-1.09656	6.73e-07	1.28314	0.110986	1.42473e-05
12171	18197956	FBtr0083533 // Atg8b // Autophagy-specific gene 8b // 90C2-90C2 // 42132 /// NM_142392	Atg8b	FBtr0083533	0.711829	1.06395	0.00200385	1.75248	0.859253	0.00847108
2941	18145289	FBtr0300671 // dpr3 // CG33516 gene product from transcript CG33516-RD // 22C1-22C3 //	dpr3	FBtr0300671	0.954865	-1.00301	0.00695928	1.16443	0.980701	0.0232717
12513	18199806	FBtr0085177 // CG14262 // CG14262 gene product from transcript CG14262-RA // 97E11-97F1	CG14262	FBtr0085177	0.862706	1.02487	2.25e-05	2.01795	0.937364	0.00023332
6139	18163566	FBtr0301624 // CG4681 // CG4681 gene product from transcript CG4681-RA // 60D5-60D7 //	CG4681	FBtr0301624	0.777979	1.04419	0.00257006	1.64654	0.895625	0.0103756
6503	18165669	NM_057507 // Glu-RI // Glutamate receptor I // 65C1-65C1 // 38742 /// FBtr0076982 // Gl	Glu-RI	NM_057507	0.0887411	-1.16317	0.0336058	-1.21076	0.24434	0.0822977
11735	18195507	NM_001275335 // CG44098 // CG44098 gene product from transcript CG44098-RB // 82D4-82D5	CG44098	NM_001275335	0.00039694	-1.30322	1.8e-06	-1.47892	0.00415045	3.11225e-05
3083	18145894	FBtr0110802 // CG14034 // CG14034 gene product from transcript CG14034-RB // 25D1-25D1	CG14034	FBtr0110802	0.00234493	1.63653	0.000336655	1.81992	0.0167648	0.00203741
10911	18190402	FBtr0083812 // CG31459 // CG31459 gene product from transcript CG31459-RA // 92B3-92B3	CG31459	FBtr0083812	0.545363	1.11387	4.95e-05	2.29431	0.754204	0.000444411
2838	18144667	FBtr0079114 // CG31646 // CG31646 gene product from transcript CG31646-RA // 25F1-25F2	CG31646	FBtr0079114	0.339554	1.07411	0.368218	-1.06962	0.575156	0.520293
5618	18160822	FBtr0086889 // swi2 // CG14485 gene product from transcript CG14485-RA // 54D5-54D6 //	swi2	FBtr0086889	0.659486	1.04505	0.711583	1.03765	0.831143	0.812353
2452	18142531	FBtr0079632 // CG8292 // CG8292 gene product from transcript CG8292-RA // 28F3-28F3 //	CG8292	FBtr0079632	0.595259	-1.06576	0.000157195	1.66579	0.788622	0.00111858
808	18133578	FBtr0077428 // CG15429 // CG15429 gene product from transcript CG15429-RA // 24E1-24E1	CG15429	FBtr0077428	0.0925542	-1.24506	0.0279814	1.33799	0.251485	0.0710282
5361	18159451	NM_136736 // Ir47a // Ionotropic receptor 47a // 47A2-47A2 // 36095 /// FBtr0088323 //	Ir47a	NM_136736	0.0699066	-1.18367	0.127713	-1.15093	0.206369	0.235977
14919	18213767	FBtr0333660 // RhoGAPp190 // CG32555 gene product from transcript CG32555-RG // 16B10-1	RhoGAPp190	FBtr0333660	0.279047	1.05459	0.129776	-1.07797	0.510678	0.238617
12357	18198982	FBtr0084382 // CG4434 // CG4434 gene product from transcript CG4434-RA // 94E9-94E9 //	CG4434	FBtr0084382	0.540172	-1.12038	0.0371816	1.49119	0.750996	0.0889851
10303	18186928	FBtr0083636 // CG14305 // CG14305 gene product from transcript CG14305-RA // 91B5-91B5	CG14305	FBtr0083636	0.687603	1.06932	0.000523593	1.8946	0.846512	0.0028914
2143	18140798	NM_164701 // Nhe3 // Na[+]/H[+] hydrogen exchanger 3 // 26F7-26F7 // 33939 /// FBtr0273	Nhe3	NM_164701	1.57e-05	-1.20574	1.22e-06	-1.24576	0.00030763	2.27836e-05
13271	18204165	FBtr0113417 // CG32000 // CG32000 gene product from transcript CG32000-RH // 102A3-102A	CG32000	FBtr0113417	1.83e-06	-1.24033	1.72e-08	-1.31903	5.10586e-05	6.76478e-07
10844	18190022	FBtr0113394 // CG31157 // CG31157 gene product from transcript CG31157-RD // 87D10-87D1	CG31157	FBtr0113394	0.000391954	-1.81486	0.000316154	-1.83601	0.00412208	0.00193849
4326	18153037	FBtr0087406 // CG12853 // CG12853 gene product from transcript CG12853-RA // 51D3-51D3	CG12853	FBtr0087406	0.00202895	1.69931	6.41e-06	2.34702	0.0148972	8.56872e-05
2305	18141621	FBtr0077419 // CG15631 // CG15631 gene product from transcript CG15631-RA // 25A4-25A4	CG15631	FBtr0077419	0.730651	1.03806	2.75e-05	1.69621	0.870424	0.000275202
4287	18152840	FBtr0072322 // CG3640 // CG3640 gene product from transcript CG3640-RA // 60D10-60D10 /	CG3640	FBtr0072322	0.0283017	-1.41609	0.00458435	-1.58749	0.110275	0.0165984
10135	18186082	FBtr0082737 // CG8630 // CG8630 gene product from transcript CG8630-RA // 87E3-87E4 //	CG8630	FBtr0082737	0.409468	-1.06567	0.781974	1.02146	0.641864	0.859892
599	18132442	FBtr0077425 // CG16857 // CG16857 gene product from transcript CG16857-RA // 24E1-24E1	CG16857	FBtr0077425	0.463629	-1.06032	0.228841	-1.10174	0.689558	0.367271
2872	18144861	FBtr0081055 // CG31787 // CG31787 gene product from transcript CG31787-RA // 36F2-36F2	CG31787	FBtr0081055	0.813462	1.03882	0.0016815	1.73419	0.91364	0.00733927
9149	18180480	FBtr0333216 // CG33489 // CG33489 gene product from transcript CG33489-RA // 68C13-68C1	CG33489	FBtr0333216	0.00396855	1.49471	7.35e-06	2.00167	0.0253026	9.52873e-05
4838	18155761	FBtr0330607 // psq // pipsqueak // 47A13-47B1 // 36118 /// FBtr0088275 // psq // pipsqu	psq	FBtr0330607	0.0202974	-1.11226	0.0415268	-1.09689	0.0863195	0.0973012
2765	18144264	FBtr0304885 // CG2225 // CG2225 gene product from transcript CG2225-RH // 39E6-39E7 //	CG2225	FBtr0304885	0.076632	-1.10065	0.0314707	-1.12522	0.220054	0.0780764
6901	18168196	FBtr0302557 // Tsp66A // Tetraspanin 66A // 66A2-66A2 // 38836 /// FBtr0302558 // CG426	Tsp66A	FBtr0302557	0.34609	-1.15053	0.00726607	1.52371	0.580981	0.0240952
8774	18178584	NM_140755 // Ir75a // Ionotropic receptor 75a // 75A2-75A2 // 39982 /// FBtr0273392 //	Ir75a	NM_140755	0.901702	-1.01406	0.843465	1.02258	0.955439	0.903204
8299	18176150	---	NA	---	8.33e-10	1.78606	3.86e-09	1.71698	7.27071e-08	1.96168e-07
11900	18196380	FBtr0082152 // CG9458 // CG9458 gene product from transcript CG9458-RA // 85E10-85E10 /	CG9458	FBtr0082152	0.529635	1.14498	0.686503	-1.09064	0.743389	0.793403
7555	18171547	FBtr0332144 // ltl // larval translucida // 66A3-66A4 // 38845 /// NM_001274595 // ltl	ltl	FBtr0332144	0.572956	-1.0211	8.16e-05	-1.18067	0.772835	0.000659018
10546	18188346	FBtr0273265 // CG11913 // CG11913 gene product from transcript CG11913-RB // 96D2-96D2	CG11913	FBtr0273265	0.302531	1.18836	0.00119716	1.79876	0.536512	0.0056198
2857	18144781	FBtr0331636 // CG31712 // CG31712 gene product from transcript CG31712-RA // 30F1-30F1	CG31712	FBtr0331636	0.399561	-1.04149	0.000947052	-1.18994	0.632614	0.00465363
5287	18158978	FBtr0088760 // Cyp4ad1 // CG2110 gene product from transcript CG2110-RA // 44D1-44D1 //	Cyp4ad1	FBtr0088760	0.000122056	1.70747	8.91e-06	1.90915	0.00162496	0.00011144
15012	18214296	FBtr0070731 // CG2861 // CG2861 gene product from transcript CG2861-RE // 4D1-4D2 // 31	CG2861	FBtr0070731	0.629232	1.07936	0.00346615	1.64154	0.81041	0.0131998
9867	18184737	NM_141357 // Vha14-2 // Vacuolar H[+] ATPase subunit 14-2 // 83D4-83D4 // 40748 /// FBt	Vha14-2	NM_141357	6e-07	2.28767	8.7e-12	4.04281	2.01506e-05	1.33964e-09
8388	18176590	FBtr0077069 // alphaKap4 // alpha Karyopherin-4 // 65A2-65A2 // 38675 /// NM_139750 //	alphaKap4	FBtr0077069	0.756641	-1.05702	0.00819083	1.6505	0.885678	0.0265998
12512	18199799	FBtr0085180 // CG5987 // CG5987 gene product from transcript CG5987-RA // 97E11-97E11 /	CG5987	FBtr0085180	0.480554	1.10717	0.000202426	1.82291	0.7046	0.00136585
8617	18177848	FBtr0075900 // CG10748 // CG10748 gene product from transcript CG10748-RA // 69F2-69F2	CG10748	FBtr0075900	0.202792	-1.23993	0.257377	1.21011	0.420976	0.400506
3178	18146471	FBtr0304142 // CG42876 // CG42876 gene product from transcript CG42876-RA // 35D4-35D4	CG42876	FBtr0304142	0.00118479	1.62731	0.0302707	1.36292	0.00985709	0.0756628
15826	18218532	FBtr0332902 // CG42683 // CG42683 gene product from transcript CG42683-RD // 10B1-10B2	CG42683	FBtr0332902	0.802428	-1.01481	0.386693	-1.05249	0.908971	0.538232
13463	18205152	FBtr0114141 // CG41561 // CG41561 gene product from transcript CG41561-RA // --- // 574	CG41561	FBtr0114141	0.0327142	-1.38567	0.00348631	1.58635	0.12216	0.0132642
15064	18214530	FBtr0300759 // CG12541 // CG12541 gene product from transcript CG12541-RD // 6E4-6F1 //	CG12541	FBtr0300759	0.00827202	-1.21517	0.00788986	-1.21677	0.0443839	0.0257711
9752	18184049	FBtr0081628 // CG1979 // CG1979 gene product from transcript CG1979-RA // 84B2-84B2 //	CG1979	FBtr0081628	0.871003	-1.02698	0.00470533	1.64092	0.941167	0.0169383
14319	18210007	FBtr0077312 // CG1812 // CG1812 gene product from transcript CG1812-RA // 19D2-19D2 //	CG1812	FBtr0077312	0.000213489	-1.17328	0.110933	-1.06455	0.00256785	0.211524
13513	18205294	FBtr0303562 // br // broad // 2B3-2B4|1-0.28 cM // 44505 /// NM_001201596 // br // broa	br	FBtr0303562	0.716661	-1.02452	0.526538	-1.04328	0.861853	0.666213
14048	18208547	FBtr0073511 // CG11697 // CG11697 gene product from transcript CG11697-RA // 10C7-10C7	CG11697	FBtr0073511	0.705536	-1.08399	0.0428895	1.56291	0.856852	0.0996927
2213	18141170	FBtr0077944 // CG5565 // CG5565 gene product from transcript CG5565-RA // 22A1-22A1 //	CG5565	FBtr0077944	0.028583	-1.41147	0.00402072	1.59421	0.111	0.0149218
1640	18137780	FBtr0300217 // Skadu // CG42448 gene product from transcript CG42448-RA // 35D3-35D3 //	Skadu	FBtr0300217	0.697449	-1.06272	0.00556015	1.58728	0.852716	0.0194415
13915	18207898	NM_001031879 // Pink1 // PTEN-induced putative kinase 1 // 6C6-6C6 // 31607 /// FBtr010	Pink1	NM_001031879	3.17e-22	-9.01503	9.04e-22	-8.35075	1.03481e-18	2.45918e-18
3826	18150324	FBtr0113074 // Dyb // Dystrobrevin-like // 49A6-49A6 // 36362 /// NM_001103817 // Dyb /	Dyb	FBtr0113074	0.00285636	-1.19249	0.000207363	-1.25658	0.0196053	0.00138997
5010	18156951	FBtr0072455 // PebII // Protein ejaculatory bulb II // 60F5-60F5 // 326108 /// NM_07914	PebII	FBtr0072455	0.964978	-1.01123	0.0933913	-1.5474	0.985313	0.184365
1005	18134628	FBtr0079943 // CG4839 // CG4839 gene product from transcript CG4839-RA // 31A3-31A3 //	CG4839	FBtr0079943	0.0213186	1.26891	0.220738	1.13058	0.0894358	0.357749
13008	18202478	FBtr0110876 // l(3)neo38 // lethal (3) neo38 // 86E18-86E18 // 41423 /// NM_001043243 /	l(3)neo38	FBtr0110876	0.234281	-1.06696	0.00362162	-1.18318	0.459943	0.0136675
15807	18218309	FBtr0300200 // inaF-B // CG42447 gene product from transcript CG42447-RA // 10D8-10E1 /	inaF-B	FBtr0300200	0.077486	-1.14243	0.000612871	-1.32053	0.221679	0.00327332
5592	18160692	FBtr0087067 // CG9010 // CG9010 gene product from transcript CG9010-RA // 53E3-53E3 //	CG9010	FBtr0087067	0.000803444	-1.61324	0.139638	1.21558	0.00724921	0.252149
14748	18212745	FBtr0112843 // ph-d // polyhomeotic distal // 2D2-2D2|1-0.5 cM // 44889 /// NM_00110339	ph-d	FBtr0112843	0.191485	-1.06387	3.74e-05	-1.24962	0.406532	0.000353266
14317	18209995	FBtr0332936 // CG1695 // CG1695 gene product from transcript CG1695-RC // 19D1-19D1 //	CG1695	FBtr0332936	0.189625	-1.11703	6.12e-05	-1.46582	0.404093	0.000526849
7643	18171984	FBtr0073154 // Rdh // CG14975 gene product from transcript CG14975-RA // 63F2-63F2 // 2	Rdh	FBtr0073154	0.00138281	-1.2262	0.000171019	-1.28135	0.011091	0.00119545
14669	18212244	FBtr0074658 // bnb // bangles and beads // 17D6-17D6 // 32872 /// NM_167633 // bnb // b	bnb	FBtr0074658	0.433759	1.04514	0.0216762	-1.14409	0.663774	0.0580069
14937	18213884	FBtr0070414 // l(1)G0144 // lethal (1) G0144 // 2F2-2F2 // 31212 /// NM_130636 // l(1)G	l(1)G0144	FBtr0070414	0.353239	-1.04655	0.0028228	-1.16952	0.588657	0.0111559
2527	18143034	FBtr0080044 // CG5343 // CG5343 gene product from transcript CG5343-RA // 31E1-31E1 //	CG5343	FBtr0080044	0.621348	-1.0299	1.1e-06	1.42856	0.805532	2.09013e-05
6810	18167644	FBtr0073159 // Sc2 // CG10849 gene product from transcript CG10849-RA // 63F5-63F6 // 3	Sc2	FBtr0073159	0.51388	1.03136	9.6e-05	-1.23278	0.731324	0.000753323
14546	18211436	FBtr0302457 // CG42657 // CG42657 gene product from transcript CG42657-RA // 8F9-8F10 /	CG42657	FBtr0302457	0.224255	-1.26363	0.0209496	1.58255	0.447749	0.0566312
14876	18213511	FBtr0070278 // CG3795 // CG3795 gene product from transcript CG3795-RA // 2B7-2B7 // 31	CG3795	FBtr0070278	0.688979	-1.04854	0.0001489	1.66003	0.847375	0.001073
14859	18213397	FBtr0070423 // CG18031 // CG18031 gene product from transcript CG18031-RA // 2E2-2E2 //	CG18031	FBtr0070423	0.751873	-1.03685	0.416053	-1.09802	0.883149	0.567939
15311	18215767	FBtr0074153 // CG9170 // CG9170 gene product from transcript CG9170-RB // 14A4-14A5 //	CG9170	FBtr0074153	0.383563	-1.07815	0.00650207	-1.282	0.617834	0.0219952
7791	18172937	FBtr0332721 // kug // kugelei // 76E1-76E1|3-47 cM // 40191 /// NM_140914 // kug // kug	kug	FBtr0332721	0.646047	-1.02315	0.0673002	-1.09808	0.823104	0.142455
9648	18183403	NM_001260286 // Calx // Na/Ca-exchange protein // 93A4-93B3 // 42481 /// FBtr0309205 //	Calx	NM_001260286	0.0829815	-1.08999	0.0721063	-1.09369	0.232926	0.150325
5331	18159249	FBtr0332997 // CG13954 // CG13954 gene product from transcript CG13954-RC // 45D1-45D1	CG13954	FBtr0332997	0.000334129	-1.39988	5.72e-05	-1.47482	0.00366509	0.000500063
11805	18195834	FBtr0081591 // CG10029 // CG10029 gene product from transcript CG10029-RA // 84D3-84D3	CG10029	FBtr0081591	0.0358227	-1.43872	0.883787	1.02473	0.1306	0.927221
12802	18201377	FBtr0300817 // CG31189 // CG31189 gene product from transcript CG31189-RB // 93B7-93B7	CG31189	FBtr0300817	0.038213	-1.23422	0.00731741	-1.32187	0.136659	0.0242261
3002	18145467	FBtr0303445 // CG31808 // CG31808 gene product from transcript CG31808-RC // 36A11-36A1	CG31808	FBtr0303445	0.186534	1.20238	0.0758573	1.28479	0.399524	0.156965
14183	18209216	FBtr0301232 // CG8916 // CG8916 gene product from transcript CG8916-RB // 14A1-14A1 //	CG8916	FBtr0301232	0.00125947	1.38395	0.888118	-1.01308	0.0103065	0.930089
14020	18208416	FBtr0332932 // CG43901 // CG43901 gene product from transcript CG43901-RA // 9F10-9F11	CG43901	FBtr0332932	0.00302129	-1.34982	1.1e-05	-1.62875	0.0205137	0.000131533
11753	18195577	NM_079511 // Orco // Odorant receptor co-receptor // 83A2-83A2 // 40650 /// FBtr0078794	Orco	NM_079511	0.981822	-1.00206	0.0496001	-1.20084	0.992892	0.111974
4746	18155116	FBtr0111113 // p120ctn // Adherens junction protein p120 // 41B1-41B1 // 3355143 /// NM	p120ctn	FBtr0111113	0.0236781	-1.11506	0.00174986	-1.16973	0.0966359	0.00757994
6530	18165931	FBtr0075890 // trn // tartan // 70A1-70A1 // 39491 /// FBtr0330075 // trn // tartan //	trn	FBtr0075890	0.0467145	-1.13345	0.0804114	-1.11549	0.155702	0.164039
424	18131222	FBtr0077500 // slp2 // sloppy paired 2 // 24C7-24C7|2-8 cM // 33608 /// NM_057486 // sl	slp2	FBtr0077500	0.208779	-1.1162	0.0594792	-1.18239	0.428317	0.129425
3424	18147885	FBtr0087023 // Arp53D // Actin-related protein 53D // 53D8-53D8 // 36879 /// NM_057689	Arp53D	FBtr0087023	0.133711	1.27633	0.000223522	1.93793	0.322225	0.00146908
14761	18212842	NM_057576 // Wnt5 // Wnt oncogene analog 5 // 17B6-17C1 // 32838 /// FBtr0074623 // Wnt	Wnt5	NM_057576	0.224918	1.09419	0.217453	-1.09584	0.448243	0.353936
2726	18144049	FBtr0081308 // CG13965 // CG13965 gene product from transcript CG13965-RA // 38A8-38A8	CG13965	FBtr0081308	0.758681	1.02382	0.0498034	-1.16775	0.886894	0.11234
4994	18156846	NM_001169718 // sbb // scribbler // 55C2-55C4 // 44027 /// FBtr0301547 // sbb // scribb	sbb	NM_001169718	0.855084	1.00728	0.309935	-1.0415	0.933245	0.458512
6200	18163961	FBtr0112415 // CG34222 // CG34222 gene product from transcript CG34222-RA // 47A1-47A1	CG34222	FBtr0112415	0.892114	-1.01791	4e-05	1.86064	0.951406	0.0003718
9667	18183550	FBtr0082237 // jumu // jumeau // 86B1-86B1 // 41265 /// NM_079578 // jumu // jumeau //	jumu	FBtr0082237	0.312151	1.05419	0.00246557	-1.18443	0.547316	0.0100407
15754	18217968	FBtr0308591 // CG34449 // CG34449 gene product from transcript CG34449-RA // 8D7-8D9 //	CG34449	FBtr0308591	0.829569	-1.00719	6.39e-07	-1.22832	0.921312	1.37053e-05
939	18134298	FBtr0079595 // CG14277 // CG14277 gene product from transcript CG14277-RA // 28F5-28F5	CG14277	FBtr0079595	0.748133	1.02613	0.0413709	-1.18463	0.881154	0.0969638
13035	18202699	NM_142696 // Snmp1 // Sensory neuron membrane protein 1 // 93C2-93C2 // 42514 /// NM_00	Snmp1	NM_142696	3.55e-14	2.46029	5.15e-15	2.63241	1.31689e-11	2.27185e-12
5949	18162601	FBtr0088023 // CG30039 // CG30039 gene product from transcript CG30039-RA // 48D8-48D8	CG30039	FBtr0088023	0.598053	-1.06954	0.00085922	1.59299	0.790719	0.00431514
15279	18215599	FBtr0074029 // CG9072 // CG9072 gene product from transcript CG9072-RA // 13A11-13A11 /	CG9072	FBtr0074029	0.543999	-1.10806	0.00991835	1.58324	0.753556	0.0311501
15200	18215217	FBtr0073638 // CG1950 // CG1950 gene product from transcript CG1950-RA // 11A2-11A2 //	CG1950	FBtr0073638	0.383617	1.12225	1.69e-06	2.15623	0.61786	2.96604e-05
15397	18216242	FBtr0074620 // CG6481 // CG6481 gene product from transcript CG6481-RA // 17C1-17C1 //	CG6481	FBtr0074620	0.497515	-1.11109	0.00314214	1.63469	0.718151	0.0121527
14081	18208730	FBtr0073685 // CG15725 // CG15725 gene product from transcript CG15725-RA // 11B12-11B1	CG15725	FBtr0073685	0.0607946	1.18781	0.163787	-1.13446	0.187791	0.285673
8424	18176776	FBtr0333368 // unc-13-4A // CG32381 gene product from transcript CG32381-RC // 65E10-65	unc-13-4A	FBtr0333368	8.79e-05	-1.29535	1.31e-07	-1.47723	0.00124109	3.68652e-06
1015	18134683	FBtr0079989 // CG4995 // CG4995 gene product from transcript CG4995-RB // 31D7-31D8 //	CG4995	FBtr0079989	0.275266	1.19056	0.000439748	1.85466	0.506984	0.00250788
5744	18161501	FBtr0308642 // CG10440 // CG10440 gene product from transcript CG10440-RB // 57F1-57F2	CG10440	FBtr0308642	0.447604	1.05667	0.49788	-1.05038	0.676713	0.642048
6994	18168757	FBtr0301227 // CG8065 // CG8065 gene product from transcript CG8065-RB // 67D10-67D11 /	CG8065	FBtr0301227	0.27448	1.23542	0.00049452	2.0946	0.505993	0.00276234
4801	18155579	FBtr0304865 // CG43066 // CG43066 gene product from transcript CG43066-RA // 55D1-55D1	CG43066	FBtr0304865	0.23009	-1.06898	0.162719	-1.08104	0.454444	0.284236
7899	18173587	NM_080016 // Glu-RIB // Glutamate receptor IB // 67A4-67A6 // 44484 /// NM_001274692 //	Glu-RIB	NM_080016	0.089284	1.16712	0.139424	-1.14298	0.245418	0.251921
571	18132245	FBtr0300818 // CG17324 // CG17324 gene product from transcript CG17324-RB // 37A6-37B1	CG17324	FBtr0300818	3.28e-13	-3.13921	5.45e-09	-2.13264	9.07393e-11	2.60102e-07
13065	18202944	FBtr0301941 // Sfp96F // Seminal fluid protein 96F // 96F3-96F3 // 8673987 /// NM_00117	Sfp96F	FBtr0301941	0.956829	1.0074	0.00715798	1.47543	0.981519	0.0238239
8762	18178531	FBtr0075225 // CG13733 // CG13733 gene product from transcript CG13733-RA // 74C3-74C4	CG13733	FBtr0075225	0.557653	-1.09739	0.0029274	1.65933	0.763419	0.0114693
1025	18134753	FBtr0080006 // CG5096 // CG5096 gene product from transcript CG5096-RA // 31D11-31D11 /	CG5096	FBtr0080006	0.722766	1.06095	0.450266	-1.13469	0.865453	0.599938
4389	18153404	FBtr0087663 // CG30065 // CG30065 gene product from transcript CG30065-RA // 50A8-50A8	CG30065	FBtr0087663	0.703184	-1.05213	0.0617253	1.29195	0.856173	0.133265
11039	18191084	FBtr0301081 // CG34388 // CG34388 gene product from transcript CG34388-RC // 88C1-88C1	CG34388	FBtr0301081	0.854632	1.01737	0.319958	-1.09879	0.933139	0.469299
6869	18168022	FBtr0077042 // Jon65Aii // Jonah 65Aii // 65A3-65A4 // 38684 /// NM_139757 // Jon65Aii	Jon65Aii	FBtr0077042	0.038615	1.45382	0.0657995	-1.3915	0.137524	0.140102
10629	18188788	FBtr0085289 // beat-VI // CG14064 gene product from transcript CG14064-RB // 98D1-98D2	beat-VI	FBtr0085289	0.597616	-1.05086	0.0130142	-1.2778	0.790596	0.0387813
12711	18200783	NM_079588 // Adk3 // Adenylate kinase-3 // 86C7-86C7 // 41318 /// FBtr0082331 // Adk3 /	Adk3	NM_079588	0.19508	1.0949	4.55e-06	1.4613	0.411435	6.50307e-05
10862	18190159	FBtr0083666 // CG31230 // CG31230 gene product from transcript CG31230-RA // 91B8-91B8	CG31230	FBtr0083666	0.272556	-1.15958	0.00289785	1.53513	0.504003	0.0113754
7303	18170264	FBtr0078196 // mag // magro // 77C4-77C4 // 40267 /// NM_140972 // mag // magro // 77C4	mag	FBtr0078196	0.267375	1.26859	0.164167	-1.35006	0.498868	0.286214
920	18134177	FBtr0079487 // CG7164 // CG7164 gene product from transcript CG7164-RA // 28C3-28C3 //	CG7164	FBtr0079487	0.00628343	-1.48928	0.0112743	1.4421	0.0360993	0.0345187
12129	18197727	FBtr0300677 // CG10317 // CG10317 gene product from transcript CG10317-RD // 89B13-89B1	CG10317	FBtr0300677	5.15e-06	2.22517	3.4e-09	3.26851	0.000121647	1.79015e-07
6718	18167064	FBtr0072653 // CG9129 // CG9129 gene product from transcript CG9129-RA // 61F4-61F4 //	CG9129	FBtr0072653	0.210749	-1.21449	0.0428976	1.37859	0.43095	0.0996974
7208	18169756	FBtr0075212 // CG7707 // CG7707 gene product from transcript CG7707-RA // 74A2-74A2 //	CG7707	FBtr0075212	0.523625	1.07329	1.71e-06	1.90589	0.738495	2.99149e-05
12840	18201580	FBtr0082554 // CG31358 // CG31358 gene product from transcript CG31358-RA // 87A5-87A5	CG31358	FBtr0082554	0.000383353	1.67402	6.34e-08	2.49132	0.00405514	2.02112e-06
13040	18202724	FBtr0082554 // CG31358 // CG31358 gene product from transcript CG31358-RA // 87A5-87A5	CG31358	FBtr0082554	0.000383353	1.67402	6.34e-08	2.49132	0.00405514	2.02112e-06
13041	18202730	FBtr0082554 // CG31358 // CG31358 gene product from transcript CG31358-RA // 87A5-87A5	CG31358	FBtr0082554	0.000383353	1.67402	6.34e-08	2.49132	0.00405514	2.02112e-06
2869	18144849	FBtr0305673 // Acp24A4 // CG31779 gene product from transcript CG31779-RC // 24B1-24B1	Acp24A4	FBtr0305673	0.00016659	-2.16113	0.000185878	-2.14605	0.00208839	0.00127582
15619	18217377	FBtr0071463 // CG32683 // CG32683 gene product from transcript CG32683-RA // 9C1-9C4 //	CG32683	FBtr0071463	0.00552878	-1.32858	0.00239739	-1.37019	0.03264	0.00980461
15306	18215734	FBtr0074193 // CG8952 // CG8952 gene product from transcript CG8952-RA // 13E14-13E14 /	CG8952	FBtr0074193	0.024848	-1.53052	0.00892045	-1.65475	0.100065	0.028535
3419	18147839	FBtr0086802 // elk // eag-like K[+] channel // 54F4-55A2 // 37047 /// NM_057661 // elk	elk	FBtr0086802	0.350058	1.08413	0.232549	1.10923	0.585415	0.371574
10887	18190283	FBtr0113404 // CG31342 // CG31342 gene product from transcript CG31342-RC // 87D7-87D7	CG31342	FBtr0113404	0.169115	-1.04122	4.17e-05	-1.14658	0.374401	0.000384753
12592	18200260	FBtr0085602 // Mgat2 // CG7921 gene product from transcript CG7921-RB // 99D1-99D2 // 4	Mgat2	FBtr0085602	0.985978	1.00085	0.36652	1.04484	0.994324	0.518625
1285	18136139	FBtr0078004 // CG13946 // CG13946 gene product from transcript CG13946-RA // 21E2-21E2	CG13946	FBtr0078004	1.57e-15	-23.7562	2.21e-13	-13.8652	9.15198e-13	5.818e-11
11432	18193673	FBtr0083585 // gl // glass // 91A3-91A3|3-63.1 cM // 42210 /// NM_169807 // gl // glass	gl	FBtr0083585	0.00026793	-1.5295	2.18e-05	-1.67578	0.00309068	0.000227797
13752	18206994	FBtr0333475 // mei-P26 // CG12218 gene product from transcript CG12218-RB // 8C15-8C17	mei-P26	FBtr0333475	0.739701	-1.01244	0.000294703	1.16229	0.876227	0.00183244
5894	18162282	FBtr0333170 // CG9380 // CG9380 gene product from transcript CG9380-RG // 60F5-60F5 //	CG9380	FBtr0333170	0.693259	1.06298	0.586094	-1.08808	0.849949	0.715874
9703	18183764	FBtr0112893 // stumps // CG31317 gene product from transcript CG31317-RC // 88C6-88C9 /	stumps	FBtr0112893	5.69e-13	-1.55823	7.29e-13	-1.55156	1.36577e-10	1.6526e-10
15762	18217997	FBtr0071335 // t // tan // 8D1-8D1|1-27.5 cM // 31863 /// NM_132315 // t // tan // 8D1-	t	FBtr0071335	0.54276	-1.03884	0.000693214	-1.26278	0.752658	0.00362416
2458	18142595	FBtr0079609 // CG7781 // CG7781 gene product from transcript CG7781-RA // 29A4-29A4 //	CG7781	FBtr0079609	0.879284	-1.00625	0.0371354	-1.0927	0.945066	0.0889006
10526	18188252	FBtr0084780 // danr // distal antenna-related // 96C2-96C2 // 43020 /// NM_143086 // da	danr	FBtr0084780	0.000631657	1.24348	0.638177	1.02759	0.00598022	0.756615
2573	18143270	FBtr0080313 // CG6746 // CG6746 gene product from transcript CG6746-RA // 33B5-33B6 //	CG6746	FBtr0080313	0.199643	-1.06653	3.89e-06	-1.31655	0.416804	5.73555e-05
3103	18146074	NM_001259048 // Ca-beta // Ca2+-channel-protein-beta-subunit // 32D5-32E1 // 34557 ///	Ca-beta	NM_001259048	0.00619258	-1.14198	1.64e-05	-1.25885	0.0357449	0.000180378
7020	18168870	FBtr0076164 // CG14141 // CG14141 gene product from transcript CG14141-RA // 68B1-68B1	CG14141	FBtr0076164	0.00944413	1.24215	0.790033	-1.02127	0.0487972	0.865896
2854	18144760	FBtr0079776 // CG31708 // CG31708 gene product from transcript CG31708-RC // 29F8-30A1	CG31708	FBtr0079776	7.5e-07	-1.55398	1.08e-09	-1.84575	2.4483e-05	6.91285e-08
9738	18183955	FBtr0083787 // GluClalpha // CG7535 gene product from transcript CG7535-RK // 92B1-92B2	GluClalpha	FBtr0083787	0.00393274	-1.18595	0.005217	-1.17879	0.0251037	0.0184631
9918	18184996	FBtr0081739 // CG10919 // CG10919 gene product from transcript CG10919-RA // 84D14-84D1	CG10919	FBtr0081739	0.329724	-1.14224	0.000906178	1.63698	0.56454	0.00449607
11483	18193935	FBtr0078728 // Xe7 // CG2179 gene product from transcript CG2179-RD // 83B8-83B8 // 406	Xe7	FBtr0078728	0.000821964	-1.13824	0.00144171	-1.13	0.00738365	0.00651123
780	18133413	FBtr0077661 // CG15403 // CG15403 gene product from transcript CG15403-RA // 23D2-23D2	CG15403	FBtr0077661	0.000127597	-1.87361	0.365877	1.14076	0.00168226	0.517907
4708	18154805	FBtr0299663 // CG42284 // CG42284 gene product from transcript CG42284-RC // 59B2-59B2	CG42284	FBtr0299663	0.169816	-1.12804	0.191886	-1.12116	0.37532	0.321958
12484	18199666	FBtr0305049 // CG6490 // CG6490 gene product from transcript CG6490-RD // 97B4-97B9 //	CG6490	FBtr0305049	0.0998188	-1.10857	0.721947	-1.02206	0.265181	0.820072
15808	18218313	FBtr0074366 // Sep4 // Septin 4 // 15A1-15A2 // 32646 /// FBtr0074370 // Sep4 // Septin	2004-09-01	FBtr0074366	0.872905	-1.00781	0.000870033	-1.19437	0.942061	0.00435203
5899	18162316	FBtr0331926 // Alk // CG8250 gene product from transcript CG8250-RB // 53C12-53C13 // 5	Alk	FBtr0331926	0.031048	-1.16888	0.00485633	-1.2331	0.11795	0.0173865
6999	18168777	FBtr0076257 // CG14154 // CG14154 gene product from transcript CG14154-RA // 67E5-67E5	CG14154	FBtr0076257	0.127201	1.23833	1.61e-06	2.23731	0.311834	2.85946e-05
3044	18145656	FBtr0112637 // CG34393 // CG34393 gene product from transcript CG34393-RA // 23D5-23D5	CG34393	FBtr0112637	0.163921	1.12369	0.390498	1.07383	0.366675	0.54212
10284	18186855	FBtr0083539 // CG7785 // CG7785 gene product from transcript CG7785-RA // 90E1-90E1 //	CG7785	FBtr0083539	0.00398808	-1.17111	8.87e-07	-1.36408	0.0254073	1.76127e-05
11318	18192854	FBtr0300486 // Ace // Acetylcholine esterase // 87E2-87E3|3-52.5 cM // 41625 /// FBtr00	Ace	FBtr0300486	0.458612	-1.04232	6.49e-05	-1.29021	0.685493	0.00055143
10573	18188471	FBtr0273389 // CG14556 // CG14556 gene product from transcript CG14556-RB // 97A1-97A1	CG14556	FBtr0273389	0.550399	1.07238	3.45e-05	1.74998	0.758401	0.000331436
12451	18199522	FBtr0084852 // CG10560 // CG10560 gene product from transcript CG10560-RA // 96D1-96D1	CG10560	FBtr0084852	0.000781092	-1.35893	0.00595411	-1.27531	0.00706706	0.0205244
13239	18203824	FBtr0301812 // CG41128 // CG41128 gene product from transcript CG41128-RB // --- // 335	CG41128	FBtr0301812	0.849134	-1.00835	0.417724	1.03624	0.930303	0.569646
2463	18142624	NM_078790 // Dh31 // Diuretic hormone 31 // 29D1-29D3 // 34181 /// NM_164825 // Dh31 //	Dh31	NM_078790	0.322753	-1.06961	0.00640068	-1.21635	0.558285	0.0216972
9915	18184981	FBtr0301649 // wa-cup // walker cup // 84D6-84D6 // 40892 /// NM_141464 // wa-cup // wa	wa-cup	FBtr0301649	0.871388	-1.02501	0.000394126	1.82441	0.941284	0.00230571
908	18134094	FBtr0079442 // CG15818 // CG15818 gene product from transcript CG15818-RA // 27F3-27F3	CG15818	FBtr0079442	1.59e-14	10.6328	3.62e-07	3.0833	7.01405e-12	8.76642e-06
9214	18180741	FBtr0112716 // CG34420 // CG34420 gene product from transcript CG34420-RC // 68E2-68E2	CG34420	FBtr0112716	0.10856	-1.13825	3.55e-06	-1.5543	0.280012	5.3453e-05
11368	18193214	FBtr0084067 // mod(mdg4) // modifier of mdg4 // 93D7-93D9|3-70.7 cM // 49228 /// NM_163	mod(mdg4)	FBtr0084067	0.000393528	-1.1898	1.81e-07	-1.33928	0.00412324	4.85104e-06
13713	18206759	FBtr0070215 // ssx // sister-of-Sex-lethal // 2A1-2A1 // 31086 /// NM_206603 // ssx //	ssx	FBtr0070215	0.600568	1.01585	0.158793	-1.04387	0.792841	0.278479
3025	18145544	FBtr0080184 // Porin2 // CG17137 gene product from transcript CG17137-RB // 32B1-32B1 /	Porin2	FBtr0080184	0.535404	-1.10992	0.0037865	1.68355	0.747498	0.0141718
10845	18190028	NM_176541 // Efa6 // Efa6 pleckstrin and Sec7 domain containing // 94B5-94B6 // 42665 /	Efa6	NM_176541	0.408137	1.03469	0.600263	-1.02176	0.640724	0.727519
6049	18163050	FBtr0072043 // CG30412 // CG30412 gene product from transcript CG30412-RA // 59D6-59D6	CG30412	FBtr0072043	0.778845	-1.03486	2.91e-06	1.992	0.89618	4.58908e-05
4270	18152744	FBtr0072294 // CG3492 // CG3492 gene product from transcript CG3492-RA // 60D1-60D1 //	CG3492	FBtr0072294	0.314353	1.13574	2.07e-05	1.86598	0.549697	0.000218118
13108	18203188	NR_037763 // CR42836 // ncRNA // 92D2-92D2 // 10178865 /// NR_037762 // CR42836 // ncRN	CR42836	NR_037763	0.611237	-1.08049	1.66e-05	2.15426	0.799152	0.000181965
10686	18189091	FBtr0331355 // CG15522 // CG15522 gene product from transcript CG15522-RB // 99C7-99C7	CG15522	FBtr0331355	0.0292043	1.18934	0.959153	1.00392	0.112769	0.974315
12045	18197261	FBtr0082838 // CG9602 // CG9602 gene product from transcript CG9602-RA // 87F12-87F12 /	CG9602	FBtr0082838	0.290967	-1.16621	0.00341027	1.5744	0.523151	0.0130175
12877	18201759	FBtr0082905 // CG31533 // CG31533 gene product from transcript CG31533-RA // 88A10-88A1	CG31533	FBtr0082905	0.532228	-1.09475	0.00950741	1.48618	0.745411	0.0300329
15560	18217079	FBtr0310302 // disco-r // disco-related // 14B1-14B1 // 64875 /// NM_001272670 // disco	disco-r	FBtr0310302	0.68327	-1.02161	0.00708016	-1.16147	0.843927	0.0236034
10532	18188278	FBtr0084810 // to // takeout // 96C7-96C7 // 43036 /// NM_079773 // to // takeout // 96	to	FBtr0084810	6.36e-16	5.04968	9.67e-15	4.32606	4.15232e-13	3.67055e-12
5453	18159973	FBtr0087815 // CG3790 // CG3790 gene product from transcript CG3790-RA // 49D6-49D6 //	CG3790	FBtr0087815	0.00297842	1.34191	0.531693	-1.05941	0.0202811	0.6711
11576	18194594	FBtr0085861 // CG2187 // CG2187 gene product from transcript CG2187-RA // 100D2-100D2 /	CG2187	FBtr0085861	0.016338	-1.44735	0.000744731	-1.72426	0.073696	0.00384303
13277	18204230	NM_001258476 // pan // pangolin // 102A3-102A4 // 43769 /// FBtr0089160 // pan // pango	pan	NM_001258476	0.00174978	-1.13117	6.45e-06	-1.21532	0.0132529	8.59333e-05
15197	18215201	FBtr0073579 // CG1492 // CG1492 gene product from transcript CG1492-RA // 11A1-11A1 //	CG1492	FBtr0073579	0.0602528	-1.13746	0.000496121	-1.29289	0.186577	0.00276851
13045	18202752	FBtr0303038 // p24-2 // p24-related-2 // 85E4-85E4 // 318890 /// FBtr0303039 // Unc-115	p24-2	FBtr0303038	0.707245	-1.01946	0.583163	-1.0286	0.857121	0.713829
14104	18208827	NM_132658 // GstT4 // Glutathione S transferase T4 // 11F4-11F4 // 32299 /// FBtr007377	GstT4	NM_132658	1.59e-06	1.40099	0.00167073	1.21704	4.56901e-05	0.0072972
7969	18174160	NM_057353 // Rh4 // Rhodopsin 4 // 73D2-73D3 // 39887 /// FBtr0075338 // Rh4 // Rhodops	Rh4	NM_057353	3.58e-07	-1.4606	0.00478756	-1.19592	1.29851e-05	0.0171742
2791	18144374	FBtr0077399 // hoe1 // hoepel1 // 25B3-25B3 // 249663 /// FBtr0077399 // hoe1 // hoepel	hoe1	FBtr0077399	0.974785	-1.0014	0.000937335	-1.17353	0.98964	0.00462071
14266	18209692	FBtr0074648 // CG7349 // CG7349 gene product from transcript CG7349-RA // 17F2-17F2 //	CG7349	FBtr0074648	0.309074	-1.21107	0.0707762	1.41414	0.544092	0.148237
6484	18165559	FBtr0073220 // tipE // temperature-induced paralytic E // 64A10-64A10|3-13.5 cM // 3850	tipE	FBtr0073220	0.631315	-1.03246	0.0230039	-1.17076	0.811507	0.0607851
3375	18147500	NM_057490 // Cbp53E // Calbindin 53E // 53E4-53E4 // 36905 /// FBtr0087056 // Cbp53E //	Cbp53E	NM_057490	0.34391	1.06679	0.287354	-1.07554	0.579049	0.434398
3533	18148595	FBtr0071821 // wrapper // CG10382 gene product from transcript CG10382-RA // 58D4-58D4	wrapper	FBtr0071821	0.0566733	-1.16645	7.53e-05	-1.42575	0.178645	0.000619167
3919	18150843	FBtr0308814 // tun // tungus // 52C8-52C8 // 36743 /// NM_001259422 // tun // tungus //	tun	FBtr0308814	0.0113142	-1.14928	0.0208313	-1.13406	0.0561308	0.0563768
4005	18151339	FBtr0089630 // CG10910 // CG10910 gene product from transcript CG10910-RB // 55B1-55B1	CG10910	FBtr0089630	2.23e-08	4.0632	0.00720929	1.71988	1.25079e-06	0.0239741
2111	18140608	FBtr0080228 // CG6230 // CG6230 gene product from transcript CG6230-RA // 32D4-32D4 //	CG6230	FBtr0080228	0.794528	1.01105	4.09e-06	1.26274	0.904785	5.97645e-05
6261	18164407	FBtr0302888 // CG42691 // CG42691 gene product from transcript CG42691-RA // 56E5-56E5	CG42691	FBtr0302888	0.00276691	1.62771	1.33e-08	3.13615	0.0191281	5.49576e-07
1143	18135357	FBtr0080981 // CG5050 // CG5050 gene product from transcript CG5050-RA // 36C9-36C9 //	CG5050	FBtr0080981	0.667248	1.06359	0.000123428	1.86461	0.835408	0.00092201
8669	18178058	FBtr0075665 // CG12310 // CG12310 gene product from transcript CG12310-RA // 71B2-71B2	CG12310	FBtr0075665	9.89e-05	1.92299	0.467605	1.11371	0.00137033	0.615735
1959	18139569	FBtr0100399 // dac // dachshund // 36A1-36A2 // 34982 /// FBtr0080878 // dac // dachshu	dac	FBtr0100399	0.559601	-1.03733	0.00968932	-1.18689	0.7639	0.0305366
10477	18187937	NM_142963 // Kal1 // Kallmann syndrome 1 ortholog // 95E1-95E5 // 42865 /// FBtr0084549	Kal1	NM_142963	0.0133238	-1.20168	0.000967037	1.29064	0.0635509	0.00472374
5721	18161380	FBtr0071553 // CG15651 // CG15651 gene product from transcript CG15651-RA // 57B5-57B5	CG15651	FBtr0071553	0.0418472	-1.20552	0.0661132	-1.1826	0.145191	0.140636
1064	18134955	NM_135656 // Ppt2 // Palmitoyl-protein Thioesterase 2 // 32E2-32E2 // 34564 /// FBtr008	Ppt2	NM_135656	1.43e-11	-2.07076	7.85e-15	-2.65348	2.26606e-09	3.20319e-12
10361	18187242	NM_001104377 // Lrrk // Leucine-rich repeat kinase // 92F4-92F4 // 42447 /// FBtr011278	Lrrk	NM_001104377	0.0559417	-1.11166	0.0021401	-1.19546	0.177057	0.00892
2505	18142886	FBtr0113032 // CG44153 // CG44153 gene product from transcript CG44153-RB // 31A3-31B1	CG44153	FBtr0113032	0.542797	1.05858	0.445628	-1.07408	0.752658	0.595752
1753	18138402	FBtr0305896 // CG43167 // CG43167 gene product from transcript CG43167-RA // 32F4-32F4	CG43167	FBtr0305896	4.68e-05	-2.07723	0.894364	1.02092	0.000751101	0.934679
7627	18171921	FBtr0302155 // CG34002 // CG34002 gene product from transcript CG34002-RB // 75A4-75A4	CG34002	FBtr0302155	0.242251	-1.15419	0.288678	-1.13866	0.469878	0.435794
578	18132290	FBtr0080114 // CG6495 // CG6495 gene product from transcript CG6495-RA // 32A5-32A5 //	CG6495	FBtr0080114	0.670688	1.03554	0.020574	-1.21964	0.837003	0.0558056
15001	18214258	FBtr0070658 // CG12692 // CG12692 gene product from transcript CG12692-RB // 4B5-4B6 //	CG12692	FBtr0070658	0.182415	-1.18103	0.000782328	1.57501	0.393772	0.00400287
8837	18178912	NM_176363 // wnd // wallenda // 76B9-76B9 // 40143 /// FBtr0074965 // wnd // wallenda /	wnd	NM_176363	0.0328637	-1.12405	3.93e-05	-1.28495	0.122526	0.000367385
12542	18199996	FBtr0085314 // CG9997 // CG9997 gene product from transcript CG9997-RB // 98E3-98E3 //	CG9997	FBtr0085314	0.50842	-1.14383	0.579991	1.11889	0.726976	0.711454
3531	18148584	FBtr0087043 // CG6421 // CG6421 gene product from transcript CG6421-RA // 53D15-53D15 /	CG6421	FBtr0087043	1.79e-11	2.37317	1.53e-12	2.59841	2.75626e-09	2.93796e-10
3933	18150952	NM_137241 // Jhedup // Juvenile hormone esterase duplication // 52E5-52E5 // 36779 ///	Jhedup	NM_137241	0.426629	1.09083	0.00393493	-1.39971	0.657114	0.0146401
11494	18194049	NM_079517 // Obp83a // Odorant-binding protein 83a // 83D1-83D1 // 40737 /// FBtr007865	Obp83a	NM_079517	0.252584	-1.11843	0.0955311	-1.17947	0.482446	0.187772
3074	18145830	FBtr0308253 // kis // kismet // 21B4-21B5|2-0 cM // 33185 /// FBtr0299837 // kis // kis	kis	FBtr0308253	0.47546	1.02383	0.000344428	-1.14009	0.700845	0.00207521
3604	18149035	FBtr0086089 // CG10396 // CG10396 gene product from transcript CG10396-RB // 41E5-41E5	CG10396	FBtr0086089	0.29332	1.16587	0.000101653	1.89572	0.525691	0.000787461
12108	18197611	FBtr0300174 // Trissin // CG14871 gene product from transcript CG14871-RB // 88F6-88F6	Trissin	FBtr0300174	0.47878	-1.06861	0.180967	-1.13504	0.703556	0.308094
2661	18143691	FBtr0080991 // CG15145 // CG15145 gene product from transcript CG15145-RA // 36C11-36C1	CG15145	FBtr0080991	0.984969	-1.00254	0.000119083	1.79954	0.994166	0.000894465
435	18131338	FBtr0080281 // Cry // Crystallin // 33B2-33B2 // 34604 /// NM_057558 // Cry // Crystall	Cry	FBtr0080281	7.79e-09	2.15874	8.13e-07	1.82947	5.04557e-07	1.65047e-05
10360	18187236	FBtr0083913 // CG5466 // CG5466 gene product from transcript CG5466-RA // 92F3-92F3 //	CG5466	FBtr0083913	0.001005	1.27991	0.0001744	1.33613	0.00868835	0.00121201
2906	18144998	FBtr0077787 // CG31948 // CG31948 gene product from transcript CG31948-RB // 22E1-22E1	CG31948	FBtr0077787	0.829797	1.0417	0.00489043	1.77031	0.921312	0.0174932
14397	18210392	FBtr0074324 // CG32572 // CG32572 gene product from transcript CG32572-RA // 15A3-15A3	CG32572	FBtr0074324	0.905863	1.01584	0.0031865	1.52427	0.957114	0.0122895
651	18132726	FBtr0305557 // CG17341 // CG17341 gene product from transcript CG17341-RB // 35A1-35A1	CG17341	FBtr0305557	0.301587	1.08977	0.133243	-1.13448	0.535404	0.243374
2502	18142869	FBtr0079891 // CG5846 // CG5846 gene product from transcript CG5846-RA // 30F2-30F2 //	CG5846	FBtr0079891	3.78e-18	3.07434	1.96e-18	3.15567	3.85607e-15	2.28508e-15
787	18133461	FBtr0077587 // CG15408 // CG15408 gene product from transcript CG15408-RA // 23E4-23E4	CG15408	FBtr0077587	0.392687	1.10838	0.754467	-1.03817	0.627293	0.840861
4207	18152405	FBtr0071998 // CG13539 // CG13539 gene product from transcript CG13539-RA // 59D2-59D2	CG13539	FBtr0071998	0.993337	-1.00138	0.00049014	1.88971	0.996818	0.00274239
10064	18185717	FBtr0082391 // CG5281 // CG5281 gene product from transcript CG5281-RA // 86E5-86E5 //	CG5281	FBtr0082391	0.000169073	-1.41549	2.42e-05	-1.49625	0.00211262	0.000247489
4580	18154269	NM_137482 // GstE4 // Glutathione S transferase E4 // 55C7-55C7 // 37109 /// FBtr008667	GstE4	NM_137482	0.172898	1.14608	0.0731249	-1.19877	0.380036	0.152102
10896	18190340	FBtr0082236 // CG31406 // CG31406 gene product from transcript CG31406-RB // 86B1-86B1	CG31406	FBtr0082236	0.390861	1.16053	0.00175565	1.79639	0.625307	0.00759696
10559	18188414	FBtr0084902 // CG5024 // CG5024 gene product from transcript CG5024-RA // 96F3-96F3 //	CG5024	FBtr0084902	0.775176	1.04672	2.22e-05	2.20487	0.894607	0.000230795
7486	18171214	FBtr0075953 // CG32105 // CG32105 gene product from transcript CG32105-RB // 69B1-69B2	CG32105	FBtr0075953	0.00440308	1.28309	0.837699	-1.0169	0.0274721	0.898664
9384	18181814	NM_001259740 // Unr // Upstream of N-ras // 66C13-66C13 // 38963 /// FBtr0308954 // Unr	Unr	NM_001259740	0.748539	-1.01209	0.0864937	-1.06799	0.8815	0.173327
10486	18187988	FBtr0084606 // CG6432 // CG6432 gene product from transcript CG6432-RA // 95F14-95F14 /	CG6432	FBtr0084606	0.153065	1.25158	0.123687	-1.27436	0.350987	0.230065
5471	18160064	FBtr0087757 // CG4712 // CG4712 gene product from transcript CG4712-RB // 49F13-49F13 /	CG4712	FBtr0087757	0.712439	-1.06643	0.00470815	1.69319	0.859577	0.0169415
4418	18153538	FBtr0072122 // CG30177 // CG30177 gene product from transcript CG30177-RA // 60A1-60A1	CG30177	FBtr0072122	0.355467	-1.16458	0.0118671	1.54379	0.590162	0.0360177
6516	18165812	FBtr0301948 // Eip63E // Ecdysone-induced protein 63E // 63E3-63E5 // 38433 /// NM_0011	Eip63E	FBtr0301948	0.0110359	-1.12411	2.14e-07	-1.33159	0.0550608	5.57973e-06
10111	18185920	FBtr0110781 // CG11598 // CG11598 gene product from transcript CG11598-RB // 87C3-87C3	CG11598	FBtr0110781	6.38e-18	28.7657	3.84e-15	14.3916	5.78524e-15	1.74101e-12
1677	18137965	FBtr0310020 // haf // hattifattener // 22A3-22A3 // 33339 /// NM_001272946 // haf // ha	haf	FBtr0310020	0.000128256	-1.32756	3.56e-05	-1.36686	0.00168822	0.0003404
3710	18149657	NM_136628 // Cyp4p2 // CG1944 gene product from transcript CG1944-RA // 45B7-45B7 // 35	Cyp4p2	NM_136628	2.89e-18	14.0373	1.44e-19	18.7757	3.51467e-15	2.1367e-16
3862	18150527	NM_137048 // S-Lap5 // Sperm-Leucylaminopeptidase 5 // 50B4-50B5 // 36515 /// FBtr00876	S-Lap5	NM_137048	0.242916	1.19657	0.000159879	1.91073	0.47072	0.00113458
7679	18172085	FBtr0112464 // CG34269 // CG34269 gene product from transcript CG34269-RA // 61C3-61C3	CG34269	FBtr0112464	0.000119958	1.76988	1.59e-10	3.36354	0.00160401	1.47454e-08
8871	18179124	FBtr0078234 // CG13248 // CG13248 gene product from transcript CG13248-RA // 77C1-77C2	CG13248	FBtr0078234	0.209968	-1.12134	0.0865255	-1.17159	0.42973	0.17337
14115	18208896	FBtr0332888 // CG15760 // CG15760 gene product from transcript CG15760-RB // 12B2-12B2	CG15760	FBtr0332888	0.00319532	-1.29765	0.000137404	-1.42547	0.0213571	0.001003
2428	18142380	FBtr0079496 // CG7149 // CG7149 gene product from transcript CG7149-RA // 28C3-28C4 //	CG7149	FBtr0079496	1.57e-07	-1.51245	1.24e-09	-1.68942	6.65598e-06	7.63746e-08
2276	18141492	NM_134929 // pgant2 // polypeptide GalNAc transferase 2 // 23F1-23F1 // 33556 /// NM_20	pgant2	NM_134929	1.09e-05	-1.46094	9.1e-07	-1.55595	0.000231052	1.79819e-05
15263	18215521	FBtr0073985 // CG9521 // CG9521 gene product from transcript CG9521-RA // 12F6-12F6 //	CG9521	FBtr0073985	0.837577	1.01988	0.0937271	-1.17896	0.925528	0.184939
14366	18210263	FBtr0070376 // Unc-76 // CG3981 gene product from transcript CG3981-RC // 2C10-2D1 // 3	Unc-76	FBtr0070376	0.00744332	1.12197	0.0340815	1.09318	0.0410994	0.0832503
13021	18202575	FBtr0290328 // beat-VII // CG42242 gene product from transcript CG42242-RD // 97C3-97C4	beat-VII	FBtr0290328	0.0583697	-1.17053	0.000319397	-1.38308	0.182337	0.00195617
5436	18159856	FBtr0113073 // CG8834 // CG8834 gene product from transcript CG8834-RB // 49A4-49A4 //	CG8834	FBtr0113073	0.727346	1.05883	0.0288521	-1.45121	0.868376	0.0727586
12686	18200680	FBtr0290273 // grsm // granny smith // 87D5-87D5 // 41587 /// NM_169482 // grsm // gran	grsm	FBtr0290273	1.5e-10	1.66571	4.54e-09	1.54891	1.6322e-08	2.25046e-07
14881	18213546	FBtr0302175 // Scgdelta // Sarcoglycan delta // 2B8-2B8 // 31129 /// FBtr0070277 // Scg	Scgdelta	FBtr0302175	0.655571	-1.03009	0.000338351	-1.30362	0.829031	0.00204388
14565	18211648	NM_057438 // vnd // ventral nervous system defective // 1B10-1B10|1-0.0 cM // 31003 ///	vnd	NM_057438	0.584132	-1.07153	0.305839	-1.13888	0.780852	0.454305
15630	18217466	FBtr0071243 // CG32713 // CG32713 gene product from transcript CG32713-RA // 7E11-7E11	CG32713	FBtr0071243	0.0126601	-1.59864	0.388831	1.16758	0.0614	0.54045
3315	18147034	NM_078960 // G-oalpha47A // G protein oalpha 47A // 47A7-47A9 // 36104 /// FBtr0088266	G-oalpha47A	NM_078960	0.192796	-1.07495	0.266438	-1.06336	0.4082	0.411351
10427	18187661	FBtr0084305 // CG6972 // CG6972 gene product from transcript CG6972-RA // 94C1-94C2 //	CG6972	FBtr0084305	0.0698741	1.09972	3.72e-12	-1.7386	0.206311	6.32478e-10
13067	18202952	FBtr0078957 // Syt14 // Synaptotagmin 14 // 82A3-82A3 // 40544 /// FBtr0330038 // Syt14	Syt14	FBtr0078957	0.795555	1.02147	0.26556	1.09655	0.905146	0.410306
4772	18155389	NM_001274115 // mbl // muscleblind // 54B1-54B5 // 36945 /// FBtr0310346 // mbl // musc	mbl	NM_001274115	0.000238939	-1.2002	1.7e-05	-1.25025	0.00281789	0.00018523
11547	18194393	NM_080062 // Actn3 // alpha actinin 3 // 89E5-89E5 // 44964 /// FBtr0083380 // Actn3 //	Actn3	NM_080062	0.592434	-1.09528	0.0225745	1.4976	0.786671	0.0598929
10855	18190125	NM_169872 // Naam // Nicotinamide amidase // 92A13-92B1 // 42348 /// FBtr0083786 // Naa	Naam	NM_169872	0.0747789	1.08922	0.0183492	1.12233	0.2166	0.0509
6571	18166147	NM_001275140 // Deaf1 // Deformed epidermal autoregulatory factor-1 // 76D1-76D1 // 401	Deaf1	NM_001275140	0.132504	1.06735	0.722418	-1.01524	0.320167	0.820267
10765	18189532	FBtr0305335 // CG18672 // CG18672 gene product from transcript CG18672-RB // 100B9-100B	CG18672	FBtr0305335	0.986468	-1.0028	0.0567962	1.38184	0.994475	0.124819
6153	18163669	FBtr0112381 // CG34188 // CG34188 gene product from transcript CG34188-RA // 52A1-52A1	CG34188	FBtr0112381	0.179857	-1.19059	0.000916154	1.59366	0.389877	0.00453823
2912	18145019	FBtr0309229 // Cda5 // Chitin deacetylase-like 5 // 21B1-21B1 // 33158 /// NM_001103574	Cda5	FBtr0309229	0.002492	-1.15472	3.05e-06	-1.28184	0.0175548	4.75928e-05
6228	18164182	FBtr0300313 // Sfp60F // Seminal fluid protein 60F // 60F5-60F5 // 8673980 /// NM_00116	Sfp60F	FBtr0300313	0.212342	1.35575	0.379678	1.2374	0.432636	0.530983
10185	18186386	FBtr0083004 // CG3837 // CG3837 gene product from transcript CG3837-RA // 88D7-88D7 //	CG3837	FBtr0083004	0.01163	-1.22899	0.0159616	-1.21653	0.0573236	0.0456661
10148	18186162	FBtr0082795 // CG10841 // CG10841 gene product from transcript CG10841-RA // 87F5-87F5	CG10841	FBtr0082795	0.943511	1.01469	0.0302086	1.59019	0.976289	0.0755308
11649	18195007	FBtr0082010 // Prosbeta3 // Proteasome beta3 subunit // 85C2-85C2 // 41079 /// NM_14160	Prosbeta3	FBtr0082010	0.0139153	1.11082	0.284112	-1.04492	0.065462	0.430773
3385	18147603	NM_001273926 // Hdc // Histidine decarboxylase // 46F7-46F7|2-58.4 cM // 36076 /// FBtr	Hdc	NM_001273926	0.287682	-1.09814	7.76e-05	-1.48257	0.519419	0.000634245
8551	18177490	FBtr0300274 // CG6149 // CG6149 gene product from transcript CG6149-RB // 68C8-68C8 //	CG6149	FBtr0300274	1.86e-07	-2.67101	1.47e-07	-2.70471	7.62787e-06	4.06667e-06
1919	18139318	FBtr0080299 // prd // paired // 33C3-33C3|2-45 cM // 34629 /// NM_078832 // prd // pair	prd	FBtr0080299	0.860397	-1.02347	0.567191	1.07859	0.936215	0.701181
12123	18197695	FBtr0301709 // Fer2 // 48 related 2 // 89B6-89B6 // 41961 /// NM_079652 // Fer2 // 48 r	Fer2	FBtr0301709	0.14835	-1.1338	0.916486	-1.009	0.344434	0.948386
14456	18210754	FBtr0091534 // CG33557 // CG33557 gene product from transcript CG33557-RA // 9A4-9A4 //	CG33557	FBtr0091534	0.0134806	1.32118	7.91e-06	1.76556	0.0640181	0.00010126
1447	18137026	FBtr0080674 // CG33309 // CG33309 gene product from transcript CG33309-RA // 35B6-35B6	CG33309	FBtr0080674	0.866494	-1.02482	0.000196992	1.84115	0.938831	0.00133859
7968	18174145	NM_079258 // Prm // Paramyosin // 66D12-66D12 // 39002 /// FBtr0076593 // Prm // Paramy	Prm	NM_079258	0.0680931	1.13768	0.209861	-1.09131	0.20237	0.344153
9532	18182589	NM_080171 // RpII18 // RNA polymerase II 18kD subunit // 83A1-83A1 // 48312 /// FBtr007	RpII18	NM_080171	0.0188193	-1.19379	0.00329294	1.25553	0.0818426	0.0126316
5073	18157395	FBtr0329956 // Khc-73 // Kinesin-73 // 52A6-52A10 // 36718 /// NM_001274070 // Khc-73 /	Khc-73	FBtr0329956	0.359805	-1.0405	0.00863531	-1.12723	0.594166	0.0278054
11801	18195806	FBtr0081603 // CG14606 // CG14606 gene product from transcript CG14606-RB // 84D2-84D2	CG14606	FBtr0081603	1.94e-07	2.40378	0.00257359	1.54071	7.87679e-06	0.0103796
14890	18213584	NM_130616 // Sik2 // Salt-inducible kinase 2 // 2C8-2C8 // 31170 /// FBtr0070340 // Sik	Sik2	NM_130616	0.295467	-1.07683	5.24e-05	-1.38558	0.528216	0.00046457
15752	18217940	FBtr0310439 // spri // sprint // 9D2-9D3 // 31987 /// NM_001272489 // spri // sprint //	spri	FBtr0310439	0.452691	-1.03566	0.152161	1.06998	0.681208	0.269309
5686	18161207	NM_137603 // Obp56g // Odorant-binding protein 56g // 56E3-56E3 // 37270 /// NM_206181	Obp56g	NM_137603	5.32e-09	-1.54888	6.82e-12	-1.79506	3.66384e-07	1.09133e-09
5928	18162476	FBtr0331940 // kappaTry // CG12388 gene product from transcript CG12388-RC // 47F3-47F3	kappaTry	FBtr0331940	0.867982	1.0201	0.667845	-1.05279	0.939728	0.779837
2355	18141910	FBtr0079153 // CG14000 // CG14000 gene product from transcript CG14000-RA // 26A1-26A1	CG14000	FBtr0079153	0.88421	1.02127	5.27e-05	1.95789	0.946971	0.000466216
1203	18135642	FBtr0081257 // CG13077 // CG13077 gene product from transcript CG13077-RA // 37F1-37F2	CG13077	FBtr0081257	0.658876	-1.03708	0.328812	-1.08441	0.830695	0.478629
1673	18137951	FBtr0302275 // CG42634 // CG42634 gene product from transcript CG42634-RA // 36E3-36E3	CG42634	FBtr0302275	0.243955	-1.26022	0.106269	1.38258	0.471926	0.20411
1674	18137954	FBtr0302275 // CG42634 // CG42634 gene product from transcript CG42634-RA // 36E3-36E3	CG42634	FBtr0302275	0.243955	-1.26022	0.106269	1.38258	0.471926	0.20411
10671	18189021	FBtr0085460 // Kul // Kuzbanian-like // 99B9-99B9 // 43501 /// NM_143459 // Kul // Kuzb	Kul	FBtr0085460	0.259794	-1.07326	0.00101894	-1.25029	0.489762	0.00492998
8000	18174361	FBtr0310632 // Rop // Ras opposite // 64A7-64A7 // 38493 /// NM_001274475 // Rop // Ras	Rop	FBtr0310632	0.0242781	-1.14772	0.000954999	-1.23659	0.0984026	0.00468234
6499	18165654	NM_079194 // Akh // Adipokinetic hormone // 64A7-64A7 // 38495 /// FBtr0073213 // Akh /	Akh	NM_079194	0.458191	1.12809	0.256585	1.20375	0.685292	0.399731
14028	18208461	FBtr0073439 // CG15201 // CG15201 gene product from transcript CG15201-RA // 10A8-10A8	CG15201	FBtr0073439	1.73e-05	-1.34339	2.7e-13	-2.02364	0.00033181	6.67718e-11
10308	18186952	FBtr0083695 // CG14298 // CG14298 gene product from transcript CG14298-RB // 91D3-91D3	CG14298	FBtr0083695	0.204076	-1.12642	1.98e-05	-1.58633	0.422546	0.000210813
3384	18147587	FBtr0088473 // trpl // trp-like // 46B2-46B2 // 36003 /// NM_165694 // trpl // trp-like	trpl	FBtr0088473	0.00111982	-1.29322	5.19e-07	-1.5703	0.00942635	1.16043e-05
3683	18149502	NM_136537 // Mal-A4 // Maltase A4 // 44D1-44D1 // 35827 /// FBtr0088748 // Mal-A4 // Ma	Mal-A4	NM_136537	0.538626	1.12977	0.471852	-1.15364	0.749804	0.619241
2131	18140718	FBtr0080577 // CG9008 // CG9008 gene product from transcript CG9008-RA // 34D1-34D1 //	CG9008	FBtr0080577	3.22e-05	-1.29966	0.145068	-1.08399	0.000556157	0.259627
11066	18191172	NM_001170067 // lap // like-AP180 // 84D1-84D2 // 40863 /// NM_001275409 // lap // like	lap	NM_001170067	0.70747	-1.01271	0.784428	-1.00925	0.857121	0.86156
2652	18143650	FBtr0080969 // Lrch // Leucine-rich-repeats and calponin homology domain protein // 36C	Lrch	FBtr0080969	0.053876	1.07894	0.0961311	1.06722	0.172296	0.188724
1404	18136842	FBtr0080138 // CG31870 // CG31870 gene product from transcript CG31870-RC // 32B1-32B1	CG31870	FBtr0080138	0.0748092	1.44171	6.81e-05	2.48922	0.216638	0.000573498
7615	18171875	FBtr0091684 // CG33696 // CG33696 gene product from transcript CG33696-RA // 67C3-67C4	CG33696	FBtr0091684	8.68e-06	1.47419	0.980424	1.00181	0.000189659	0.987076
13666	18206481	NR_002104 // roX2 // RNA on the X 2 // 10C7-10C7 // 3772415 /// NR_047796 // roX2 // RN	roX2	NR_002104	0.747484	-1.02296	0.0176961	-1.19132	0.880834	0.0494243
15680	18217735	FBtr0070422 // msta // CG33548 gene product from transcript CG33548-RB // 2E2-2E2 // 31	msta	FBtr0070422	0.904902	-1.00894	0.000342619	-1.34603	0.956842	0.00206582
6272	18164517	NM_080153 // aPKC // atypical protein kinase C // 51D5-51D5 // 47594 /// FBtr0303434 //	aPKC	NM_080153	0.0873379	-1.07791	0.00723105	-1.12998	0.241615	0.0240035
9570	18182840	FBtr0303148 // Ptp99A // Protein tyrosine phosphatase 99A // 99A7-99B1 // 43469 /// FBt	Ptp99A	FBtr0303148	0.00298033	-1.2065	0.033115	-1.1387	0.0202856	0.0813276
11906	18196406	FBtr0082203 // Fancl // CG12812 gene product from transcript CG12812-RA // 85F8-85F8 //	Fancl	FBtr0082203	0.605866	-1.07083	0.00116846	-1.5991	0.795891	0.00551362
14069	18208657	FBtr0300918 // CG2750 // CG2750 gene product from transcript CG2750-RB // 11A4-11A4 //	CG2750	FBtr0300918	0.0326048	-1.35287	0.00389724	1.52413	0.121891	0.014533
3226	18146638	NR_047950 // CR43410 // ncRNA // 34C6-34C6 // 12798195	CR43410	NR_047950	0.937973	-1.01045	0.000605078	1.65831	0.973246	0.00324338
13287	18204340	NM_001169361 // CaMKII // Calcium/calmodulin-dependent protein kinase II // 102F6-102F2	CaMKII	NM_001169361	1.1e-06	-1.31969	5.66e-10	-1.50062	3.33721e-05	4.02044e-08
2934	18145255	FBtr0080564 // CG33306 // CG33306 gene product from transcript CG33306-RA // 34D7-34D7	CG33306	FBtr0080564	0.115551	1.22819	0.162875	-1.19897	0.292291	0.284478
3534	18148601	NM_058059 // CkIIbeta2 // Casein kinase II beta2 subunit // 56F16-56F16 // 37300 /// FB	CkIIbeta2	NM_058059	0.823346	-1.03976	0.0530106	1.4168	0.918129	0.118057
10919	18190432	FBtr0083735 // CG31475 // CG31475 gene product from transcript CG31475-RA // 91F11-91F1	CG31475	FBtr0083735	0.89653	-1.00854	0.658667	1.02935	0.953153	0.771876
2568	18143250	FBtr0080266 // CG12307 // CG12307 gene product from transcript CG12307-RA // 32F4-32F4	CG12307	FBtr0080266	0.00646743	-1.52183	0.111002	1.26605	0.0369225	0.211591
782	18133418	FBtr0301033 // CG3347 // CG3347 gene product from transcript CG3347-RB // 23E1-23E1 //	CG3347	FBtr0301033	0.000396758	1.50982	4.58e-09	2.30045	0.00415045	2.25845e-07
7863	18173370	NR_048294 // CR43306 // ncRNA // 75C3-75C4 // 12797933	CR43306	NR_048294	0.683332	-1.07448	0.00821162	1.63678	0.843927	0.0266461
11833	18195971	FBtr0081806 // CG9636 // CG9636 gene product from transcript CG9636-RD // 84F5-84F5 //	CG9636	FBtr0081806	0.0845859	-1.06739	0.677908	-1.01546	0.236129	0.786896
1882	18139050	FBtr0078045 // ds // dachsous // 21E2-21E2|2-0.3 cM // 33245 /// NM_078722 // ds // dac	ds	FBtr0078045	0.00106947	-1.20506	5.53e-07	-1.38358	0.00911535	1.21645e-05
2064	18140304	FBtr0332509 // B4 // CG9239 gene product from transcript CG9239-RC // 34C3-34C4 // 3476	B4	FBtr0332509	0.436534	-1.0389	0.0342889	-1.11317	0.666895	0.0836442
6422	18165208	NM_001015389 // Scp1 // Sarcoplasmic calcium-binding protein 1 // 80A-80B // 3355102 //	Scp1	NM_001015389	0.990618	-1.00208	2e-07	3.20756	0.995929	5.29935e-06
2344	18141835	FBtr0079117 // CG7251 // CG7251 gene product from transcript CG7251-RA // 25F1-25F1 //	CG7251	FBtr0079117	0.479484	1.12904	0.00309141	1.7231	0.703788	0.0119881
2474	18142674	FBtr0079741 // CG9468 // CG9468 gene product from transcript CG9468-RA // 29F1-29F1 //	CG9468	FBtr0079741	0.0264084	1.83722	0.403797	1.24712	0.10457	0.555715
8087	18174850	FBtr0075130 // grim // CG4345 gene product from transcript CG4345-RA // 75C4-75C4 // 40	grim	FBtr0075130	0.0173157	-1.2842	1.12e-05	-1.68175	0.0767799	0.000133338
6905	18168229	FBtr0290026 // CG7546 // CG7546 gene product from transcript CG7546-RH // 66A3-66A3 //	CG7546	FBtr0290026	0.334204	1.03235	0.000336231	-1.13971	0.569517	0.00203559
7952	18173973	FBtr0075360 // Pros26 // Proteasome 26kD subunit // 73B1-73B1|3-44.3 cM // 39855 /// NM	Pros26	FBtr0075360	0.00244061	1.13963	0.0327535	-1.09258	0.0172673	0.0805853
8030	18174516	FBtr0304614 // Spn // Spinophilin // 62E4-62E5 // 46194 /// NM_001259642 // Spn // Spin	Spn	FBtr0304614	3.31e-05	-1.23437	2.62e-06	-1.28271	0.000569893	4.25509e-05
6961	18168560	FBtr0076430 // CG4477 // CG4477 gene product from transcript CG4477-RB // 67A4-67A4 //	CG4477	FBtr0076430	0.422296	1.1181	5.42e-07	2.37069	0.65309	1.20256e-05
9664	18183536	FBtr0083671 // VAChT // CG32848 gene product from transcript CG32848-RA // 91C1-91C3 //	VAChT	FBtr0083671	0.154617	-1.12089	0.0313759	-1.19285	0.353404	0.0779004
6508	18165729	FBtr0333208 // enc // encore // 63F1-63F3 // 44543 /// FBtr0112845 // enc // encore //	enc	FBtr0333208	0.278446	-1.03494	0.235613	-1.03837	0.509971	0.374932
3457	18148066	NM_080089 // Cyp4p1 // Cytochrome P450-4p1 // 45B7-45B7 // 45524 /// FBtr0088592 // Cyp	Cyp4p1	NM_080089	1.43e-10	-1.68969	7.45e-08	-1.47874	1.57706e-08	2.32059e-06
1197	18135604	FBtr0081247 // CG10132 // CG10132 gene product from transcript CG10132-RA // 37E5-37E5	CG10132	FBtr0081247	0.0206772	-1.15932	0.000113176	-1.30709	0.0876151	0.000861375
6498	18165649	NM_079695 // Oct-TyrR // Octopamine-Tyramine receptor // 79B1-79B2 // 42452 /// NM_0011	Oct-TyrR	NM_079695	0.103283	-1.12749	0.115439	-1.12275	0.271157	0.218255
9477	18182263	FBtr0085611 // Anp // Andropin // 99E2-99E2 // 43595 /// NM_079848 // Anp // Andropin /	Anp	FBtr0085611	0.00012337	-2.38369	7.88e-07	-3.38364	0.00163578	1.60772e-05
10965	18190657	FBtr0091947 // CG33937 // CG33937 gene product from transcript CG33937-RB // 85D11-85D1	CG33937	FBtr0091947	0.0954332	-1.09723	5.03e-05	1.28878	0.256997	0.000450108
11295	18192621	FBtr0310402 // CG43674 // CG43674 gene product from transcript CG43674-RF // 85D11-85D1	CG43674	FBtr0310402	0.403568	-1.06136	0.000266128	1.33547	0.636995	0.00169017
3982	18151203	FBtr0086918 // CG18467 // CG18467 gene product from transcript CG18467-RA // 54B14-54B1	CG18467	FBtr0086918	7.66e-07	1.82956	0.00203805	1.39087	2.48068e-05	0.00857507
9424	18181924	NR_073933 // CR43684 // ncRNA // 71B2-71B2 // 14462863	CR43684	NR_073933	1.52e-05	-2.14381	8.43e-07	-2.49209	0.00030072	1.69862e-05
10719	18189265	FBtr0085731 // CG15548 // CG15548 gene product from transcript CG15548-RA // 100B1-100B	CG15548	FBtr0085731	0.177548	1.2618	0.000218425	2.02423	0.386908	0.00144454
1329	18136417	FBtr0332228 // CG13245 // CG13245 gene product from transcript CG13245-RB // 35E1-35E1	CG13245	FBtr0332228	0.439037	1.11272	0.0085558	1.46598	0.669091	0.0276147
1841	18138762	FBtr0332228 // CG13245 // CG13245 gene product from transcript CG13245-RB // 35E1-35E1	CG13245	FBtr0332228	0.439037	1.11272	0.0085558	1.46598	0.669091	0.0276147
15472	18216620	FBtr0077274 // CG11227 // CG11227 gene product from transcript CG11227-RC // 19E5-19E5	CG11227	FBtr0077274	0.783188	-1.04022	0.000182317	1.82848	0.898832	0.00125507
14224	18209462	FBtr0074393 // CG5162 // CG5162 gene product from transcript CG5162-RA // 15F4-15F4 //	CG5162	FBtr0074393	0.687075	-1.02731	0.00137465	-1.26231	0.846181	0.00624813
11430	18193667	NM_079860 // 5-HT7 // Serotonin receptor 7 // 100B1-100B1 // 43669 /// NM_001276202 //	5-HT7	NM_079860	0.000137725	-1.36487	4.98e-10	-1.88836	0.00178692	3.66142e-08
7392	18170707	NM_167856 // Aplip1 // APP-like protein interacting protein 1 // 61F3-61F3 // 53472 ///	Aplip1	NM_167856	0.40554	-1.08175	0.229637	-1.12097	0.63849	0.36815
708	18133006	FBtr0332271 // CG4577 // CG4577 gene product from transcript CG4577-RB // 21F1-21F1 //	CG4577	FBtr0332271	8.03e-05	-1.34159	0.000258594	-1.30607	0.00115578	0.00165326
3173	18146442	NM_001103666 // CG44153 // CG44153 gene product from transcript CG44153-RB // 31A3-31B1	CG44153	NM_001103666	0.3558	-1.09564	0.00432394	-1.34987	0.590186	0.0158241
886	18133949	FBtr0079289 // CG11043 // CG11043 gene product from transcript CG11043-RA // 26E3-26E3	CG11043	FBtr0079289	0.00168325	1.45308	1.89e-09	2.48157	0.0128857	1.09392e-07
7386	18170677	FBtr0333914 // CG17698 // CG17698 gene product from transcript CG17698-RF // 80F9-80F9	CG17698	FBtr0333914	1.24e-05	1.36483	0.00667337	1.19025	0.000254903	0.0224815
6476	18165515	FBtr0074839 // polo // CG12306 gene product from transcript CG12306-RA // 77B2-77B3|3-4	polo	FBtr0074839	0.0818193	1.27547	5.32e-05	1.88421	0.230529	0.000469876
1225	18135752	FBtr0081416 // CG9328 // CG9328 gene product from transcript CG9328-RB // 38E10-38F1 //	CG9328	FBtr0081416	0.274748	-1.07168	0.0255495	-1.15727	0.506201	0.0661305
14454	18210745	NR_047742 // CR33218 // ncRNA // 3A1-3A1 // 12798099 /// NR_047743 // CR33218 // ncRNA	CR33218	NR_047742	0.366936	-1.14352	0.11043	1.27213	0.60162	0.210688
3172	18146426	FBtr0303836 // CadN2 // Cadherin-N2 // 36D3-36E1 // 35071 /// FBtr0308770 // CadN2 // C	CadN2	FBtr0303836	0.414046	-1.07919	0.0455077	-1.21144	0.645654	0.104607
620	18132577	FBtr0080801 // beat-Ic // beaten path Ic // 35E1-35E1 // 34945 /// NM_078856 // beat-Ic	beat-Ic	FBtr0080801	0.121466	-1.15699	0.101194	-1.16731	0.301715	0.196536
12570	18200140	FBtr0085464 // CG7582 // CG7582 gene product from transcript CG7582-RB // 99B7-99B7 //	CG7582	FBtr0085464	0.720365	-1.02499	0.606619	-1.03618	0.864298	0.732084
4021	18151405	NM_137479 // GstE1 // Glutathione S transferase E1 // 55C6-55C6 // 37106 /// FBtr008666	GstE1	NM_137479	3.23e-18	4.95975	7.94e-18	4.71788	3.51467e-15	7.62333e-15
11479	18193919	NM_079518 // Obp83b // Odorant-binding protein 83b // 83D1-83D1 // 40738 /// FBtr007865	Obp83b	NM_079518	0.0559921	1.25319	0.60625	1.06098	0.177182	0.731958
5825	18161885	FBtr0072019 // CG13557 // CG13557 gene product from transcript CG13557-RA // 59E1-59E1	CG13557	FBtr0072019	0.0364756	-1.2434	0.0649419	-1.21008	0.132242	0.138723
14818	18213090	FBtr0073940 // NetB // Netrin-B // 12F2-12F3 // 32400 /// NM_078600 // NetB // Netrin-B	NetB	FBtr0073940	0.00405022	-1.26207	2.22e-07	-1.64076	0.0257429	5.73336e-06
1777	18138505	FBtr0080334 // Phae1 // Phaedra 1 // 33C4-33C4 // 34637 /// NM_135706 // Phae1 // Phaed	Phae1	FBtr0080334	0.94461	1.01278	0.0596653	-1.4254	0.976652	0.129744
10350	18187187	FBtr0083866 // CG5023 // CG5023 gene product from transcript CG5023-RA // 92D2-92D3 //	CG5023	FBtr0083866	0.0519393	-1.09187	0.000172005	-1.20396	0.168339	0.00119926
2663	18143697	FBtr0080989 // CG6870 // CG6870 gene product from transcript CG6870-RA // 36D1-36D1 //	CG6870	FBtr0080989	0.000176882	-1.51081	0.00121771	-1.41193	0.00219549	0.00568846
12104	18197576	FBtr0083107 // h-cup // heineken-cup // 88F3-88F3 // 41879 /// NM_142205 // h-cup // he	h-cup	FBtr0083107	0.809644	-1.04392	0.0470869	1.44175	0.912776	0.10758
4402	18153463	FBtr0087199 // CG30093 // CG30093 gene product from transcript CG30093-RA // 52D3-52D4	CG30093	FBtr0087199	0.00677013	-1.48382	0.740476	1.0465	0.0381662	0.831685
682	18132883	FBtr0078127 // CG3345 // CG3345 gene product from transcript CG3345-RA // 21B7-21B7 //	CG3345	FBtr0078127	0.731863	-1.05356	0.00245603	1.64471	0.871487	0.0100118
16113	18219633	---	NA	---	9.67e-10	-1.64429	4.53e-05	-1.31425	8.17791e-08	0.000412144
16114	18219635	---	NA	---	9.67e-10	-1.64429	4.53e-05	-1.31425	8.17791e-08	0.000412144
10309	18186955	FBtr0083696 // CG14297 // CG14297 gene product from transcript CG14297-RA // 91D4-91D4	CG14297	FBtr0083696	0.930799	1.01662	0.0111184	1.66278	0.969488	0.0341246
11109	18191571	FBtr0081755 // wtrw // water witch // 84E4-84E4 // 40931 /// FBtr0081754 // wtrw // wat	wtrw	FBtr0081755	0.0238743	-1.15829	0.000553989	-1.26883	0.0972004	0.00301691
7443	18170976	NM_140102 // Ilp1 // Insulin-like peptide 1 // 67C8-67C8 // 39149 /// FBtr0076328 // Il	Ilp1	NM_140102	0.345781	-1.10886	0.0634459	-1.23094	0.580642	0.13624
10089	18185838	FBtr0082545 // CG3809 // CG3809 gene product from transcript CG3809-RA // 87B2-87B2 //	CG3809	FBtr0082545	0.044932	-1.40206	0.0795703	1.34062	0.151772	0.162771
7992	18174307	FBtr0072633 // LysP // Lysozyme P // 61F4-61F4 // 38129 /// NM_057480 // LysP // Lysozy	LysP	FBtr0072633	0.00463973	-1.45288	2.45e-05	-1.83403	0.0285204	0.000249463
12003	18197029	FBtr0082682 // CG17207 // CG17207 gene product from transcript CG17207-RA // 87B10-87B1	CG17207	FBtr0082682	0.72507	1.03918	0.000458696	1.52843	0.866686	0.0026014
12474	18199615	FBtr0084984 // CG14546 // CG14546 gene product from transcript CG14546-RA // 96F8-96F8	CG14546	FBtr0084984	0.532408	1.11432	0.000130159	2.11444	0.745572	0.000962163
441	18131368	NM_206004 // brat // brain tumor // 37C1-37C6 // 35197 /// FBtr0081160 // brat // brain	brat	NM_206004	0.139319	-1.0846	0.00144309	-1.20585	0.330759	0.00651566
4399	18153444	FBtr0087285 // CG30089 // CG30089 gene product from transcript CG30089-RA // 52C2-52C4	CG30089	FBtr0087285	0.517209	1.04391	0.0269447	-1.16457	0.734396	0.069041
5267	18158858	FBtr0088875 // CG14763 // CG14763 gene product from transcript CG14763-RA // 43F9-43F9	CG14763	FBtr0088875	0.665741	-1.05155	9.55e-06	1.83815	0.835186	0.000117909
10473	18187915	FBtr0084542 // CG10694 // CG10694 gene product from transcript CG10694-RA // 95E1-95E1	CG10694	FBtr0084542	0.630067	1.08076	0.0010346	1.78264	0.810909	0.00499017
14986	18214185	FBtr0070532 // CG14269 // CG14269 gene product from transcript CG14269-RB // 3D3-3D3 //	CG14269	FBtr0070532	0.627154	1.09381	0.000374079	2.07406	0.809302	0.00221784
1690	18138053	FBtr0330665 // Axud1 // CG4272 gene product from transcript CG4272-RC // 22E1-22E1 // 3	Axud1	FBtr0330665	0.533709	1.02197	0.975591	1.00107	0.746205	0.984153
12826	18201512	FBtr0083198 // CG31294 // CG31294 gene product from transcript CG31294-RA // 89A2-89A2	CG31294	FBtr0083198	0.888	-1.02105	0.000171538	1.87112	0.949053	0.00119856
14588	18211738	NR_047809 // mir-283 // mir-283 stem loop // 13C7-13C7 // 12797981 /// FBtr0304387 // M	mir-283	NR_047809	0.00926173	-1.19796	0.0422148	-1.14785	0.0481127	0.0985314
1069	18134977	FBtr0080254 // CG4988 // CG4988 gene product from transcript CG4988-RA // 33A1-33A1 //	CG4988	FBtr0080254	0.379992	-1.18578	0.0131862	1.65389	0.614935	0.0391675
13264	18204105	FBtr0089972 // CG1732 // CG1732 gene product from transcript CG1732-RA // 102D1-102D1 /	CG1732	FBtr0089972	0.259189	-1.08303	0.00692511	-1.22233	0.489243	0.0231907
3856	18150510	FBtr0087671 // CG13330 // CG13330 gene product from transcript CG13330-RA // 50A14-50A1	CG13330	FBtr0087671	0.0639499	-1.28929	0.100699	1.25078	0.194013	0.195691
8761	18178529	FBtr0075226 // CG12229 // CG12229 gene product from transcript CG12229-RA // 74C1-74C1	CG12229	FBtr0075226	0.65159	1.07955	0.000361897	1.95826	0.826319	0.00215501
4081	18151751	FBtr0086315 // CG11099 // CG11099 gene product from transcript CG11099-RA // 56F10-56F1	CG11099	FBtr0086315	0.0110378	-1.23365	0.000163386	-1.39514	0.0550608	0.00115395
13017	18202554	NM_001260430 // Dup99B // Ductus ejaculatorius peptide 99B // 99B8-99B8 // 2768691 ///	Dup99B	NM_001260430	0.000243516	-2.26907	2.01e-09	-5.20101	0.00286433	1.13914e-07
2160	18140904	FBtr0080563 // CG8997 // CG8997 gene product from transcript CG8997-RA // 34D7-34D7 //	CG8997	FBtr0080563	0.601857	1.09869	0.367799	-1.17726	0.793628	0.519942
15621	18217400	FBtr0302373 // CG32686 // CG32686 gene product from transcript CG32686-RD // 9B12-9B12	CG32686	FBtr0302373	0.72353	-1.04827	0.00110185	1.60814	0.865923	0.00524785
15071	18214571	FBtr0305135 // CG12689 // CG12689 gene product from transcript CG12689-RB // 7B4-7B4 //	CG12689	FBtr0305135	0.584316	-1.08013	0.00052676	1.71477	0.780906	0.00290269
1596	18137487	FBtr0112368 // CG34177 // CG34177 gene product from transcript CG34177-RA // 24F2-24F2	CG34177	FBtr0112368	0.959777	1.00657	0.00171823	1.55595	0.98277	0.00747068
13154	18203397	FBtr0306045 // CG43196 // CG43196 gene product from transcript CG43196-RA // 90A3-90A3	CG43196	FBtr0306045	0.183773	-1.16674	2.21e-08	-2.326	0.395457	8.46608e-07
2539	18143083	FBtr0080125 // CG7300 // CG7300 gene product from transcript CG7300-RB // 32A4-32A4 //	CG7300	FBtr0080125	0.293646	1.13635	0.0291806	-1.31475	0.526055	0.0734895
7366	18170581	FBtr0078515 // CG6914 // CG6914 gene product from transcript CG6914-RA // 79F2-79F2 //	CG6914	FBtr0078515	0.374811	1.15066	0.000207927	1.92476	0.610119	0.00139184
11854	18196083	FBtr0081942 // CG13318 // CG13318 gene product from transcript CG13318-RA // 85B1-85B1	CG13318	FBtr0081942	4.38e-05	-1.63142	0.000114065	-1.5758	0.000711347	0.000864331
9111	18180279	FBtr0077174 // shep // alan shepard // 64C8-64C11 // 38605 /// NM_168112 // shep // ala	shep	FBtr0077174	0.194523	-1.05518	0.187504	-1.05611	0.410708	0.316194
3516	18148480	FBtr0111043 // sns // sticks and stones // 44F1-44F1 // 44097 /// NM_001043067 // sns /	sns	FBtr0111043	0.862699	-1.01328	0.0382674	-1.17785	0.937364	0.0910905
13805	18207338	FBtr0070164 // CG11663 // CG11663 gene product from transcript CG11663-RA // 1D2-1D2 //	CG11663	FBtr0070164	0.282609	-1.18993	0.0673608	1.35184	0.513898	0.142547
6942	18168444	FBtr0089561 // Zasp66 // Z band alternatively spliced PDZ-motif protein 66 // 66D9-66D9	Zasp66	FBtr0089561	0.0021124	-1.17132	0.00701912	-1.14583	0.0153785	0.0234286
8545	18177447	FBtr0076190 // GlcAT-P // CG6207 gene product from transcript CG6207-RE // 68B1-68B1 //	GlcAT-P	FBtr0076190	0.750888	1.015	0.0783578	-1.08831	0.882854	0.16081
9611	18183162	FBtr0083733 // sqz // squeeze // 91F4-91F4 // 42300 /// NM_079679 // sqz // squeeze //	sqz	FBtr0083733	0.00190266	-1.20542	0.00194899	-1.20481	0.0141569	0.0082756
12468	18199597	FBtr0084924 // CG17198 // CG17198 gene product from transcript CG17198-RA // 96F2-96F2	CG17198	FBtr0084924	0.39129	-1.18052	0.128078	1.34776	0.625834	0.236507
6565	18166096	NM_176365 // Nca // Neurocalcin // 76D8-76D8 // 40186 /// NM_001170007 // Nca // Neuroc	Nca	NM_176365	0.00826648	-1.18327	0.00274468	-1.21423	0.0443688	0.0109132
11425	18193619	FBtr0305573 // unk // unkempt // 94E1-94E2|3-79.2 cM // 42738 /// FBtr0305572 // unk //	unk	FBtr0305573	0.345092	-1.0475	0.0126323	-1.13673	0.580034	0.0378598
1684	18138029	FBtr0302804 // CG42682 // CG42682 gene product from transcript CG42682-RA // 35B6-35B6	CG42682	FBtr0302804	0.43671	1.09273	0.478375	1.08411	0.667039	0.624743
4967	18156646	FBtr0087768 // lat // latheo // 49F7-49F8 // 36454 /// FBtr0300287 // CG34315 // CG3431	lat	FBtr0087768	0.41973	1.12093	0.000393493	1.74135	0.650725	0.00230283
6175	18163753	FBtr0087768 // lat // latheo // 49F7-49F8 // 36454 /// FBtr0300287 // CG34315 // CG3431	lat	FBtr0087768	0.41973	1.12093	0.000393493	1.74135	0.650725	0.00230283
7910	18173648	NM_001275125 // CG43885 // CG43885 gene product from transcript CG43885-RA // 76B6-76B6	CG43885	NM_001275125	0.00111737	-1.31271	7.53e-05	-1.4126	0.00941126	0.000619167
12382	18199126	FBtr0084525 // CG13597 // CG13597 gene product from transcript CG13597-RA // 95C8-95C9	CG13597	FBtr0084525	0.0759875	1.3	4.51e-06	2.20853	0.219013	6.46288e-05
12776	18201187	FBtr0084856 // CG31099 // CG31099 gene product from transcript CG31099-RA // 96D1-96D1	CG31099	FBtr0084856	0.500906	-1.11741	0.00856347	1.58027	0.721287	0.027634
9863	18184712	NM_141340 // glob3 // globin 3 // 83C4-83C4 // 40726 /// FBtr0078640 // glob3 // globin	glob3	NM_141340	0.911805	1.01401	3.24e-05	1.83129	0.960211	0.000314781
13647	18206370	FBtr0073527 // bif // bifocal // 10D4-10D5 // 32119 /// NM_078573 // bif // bifocal //	bif	FBtr0073527	0.25604	1.05154	0.0667906	-1.08601	0.485997	0.141689
14180	18209190	FBtr0300801 // CG16952 // CG16952 gene product from transcript CG16952-RC // 13F17-13F1	CG16952	FBtr0300801	0.902363	1.00621	0.0111794	-1.14465	0.955891	0.0342796
5202	18158386	FBtr0086061 // scaf // scarface // 41F6-41F8 // 35505 /// NM_165441 // scaf // scarface	scaf	FBtr0086061	0.190324	1.09147	0.656389	-1.0298	0.404963	0.770429
648	18132711	FBtr0331277 // Tektin-A // Tektin A // 35D5-35D5 // 34934 /// NM_001273547 // Tektin-A	Tektin-A	FBtr0331277	0.530334	1.07901	0.00268108	1.47859	0.744036	0.0107046
6537	18165992	NM_079315 // Obp69a // Odorant-binding protein 69a // 69B4-69B4 // 39411 /// FBtr007595	Obp69a	NM_079315	0.333853	1.11308	0.837859	-1.02277	0.569161	0.898721
6225	18164167	FBtr0087398 // Fs // Follistatin // 51E7-51E10 // 2768836 /// NM_144119 // Fs // Follis	Fs	FBtr0087398	0.118451	-1.13049	0.180362	1.11035	0.297116	0.307389
402	18131118	FBtr0081352 // spir // spire // 38C5-38C5|2-54 cM // 45931 /// FBtr0306556 // spir // s	spir	FBtr0081352	0.315662	1.05	0.104239	-1.08337	0.550518	0.201157
5472	18160070	FBtr0087756 // CG4714 // CG4714 gene product from transcript CG4714-RA // 49F13-49F13 /	CG4714	FBtr0087756	0.73769	-1.04687	0.00134009	1.61249	0.875233	0.00614064
2156	18140894	FBtr0307508 // CG31817 // CG31817 gene product from transcript CG31817-RB // 35F1-35F1	CG31817	FBtr0307508	0.797686	-1.03364	0.00137025	1.56839	0.906547	0.00623682
14246	18209599	FBtr0074515 // CG7135 // CG7135 gene product from transcript CG7135-RA // 16F7-16F7 //	CG7135	FBtr0074515	0.0779853	-1.21819	0.000663238	-1.5064	0.222375	0.00349431
4673	18154621	FBtr0112732 // CG34431 // CG34431 gene product from transcript CG34431-RA // 43F5-43F5	CG34431	FBtr0112732	0.144154	-1.21887	0.0306701	1.34871	0.338607	0.0764972
8989	18179686	FBtr0330115 // Sox21b // CG32139 gene product from transcript CG32139-RA // 70D2-70D2 /	Sox21b	FBtr0330115	0.0363894	1.17211	0.00287696	-1.2649	0.131988	0.0113124
13963	18208130	FBtr0071173 // CG1387 // CG1387 gene product from transcript CG1387-RA // 7E5-7E6 // 31	CG1387	FBtr0071173	0.535569	-1.09919	0.00106873	1.72422	0.747523	0.00512902
9375	18181708	FBtr0307368 // CG43373 // CG43373 gene product from transcript CG43373-RB // 73A4-73A5	CG43373	FBtr0307368	0.640785	1.04209	0.0560386	-1.1897	0.818931	0.123536
15511	18216827	FBtr0331303 // CG3711 // CG3711 gene product from transcript CG3711-RC // 1D2-1D2 // 31	CG3711	FBtr0331303	0.249177	-1.0654	0.257595	-1.06419	0.478408	0.400682
11877	18196209	FBtr0082118 // mura // murashka // 85D22-85D24 // 41145 /// NM_169292 // mura // murash	mura	FBtr0082118	0.423436	-1.02886	0.244067	-1.04253	0.653944	0.384861
4940	18156410	FBtr0086783 // stau // staufen // 55B5-55B7|2-83.5 cM // 37065 /// NM_057403 // stau //	stau	FBtr0086783	0.00921634	1.12791	0.0796224	-1.08171	0.0479379	0.162816
8773	18178577	FBtr0075167 // cln3 // CG5582 gene product from transcript CG5582-RA // 75A2-75A2 // 39	cln3	FBtr0075167	0.397254	-1.06394	0.00431802	-1.24903	0.630983	0.0158095
10503	18188101	FBtr0084701 // CG13636 // CG13636 gene product from transcript CG13636-RB // 96A24-96A2	CG13636	FBtr0084701	0.60922	1.03347	0.122395	-1.10654	0.798241	0.22826
13552	18205568	FBtr0112813 // dlg1 // discs large 1 // 10B6-10B10|1-34.8 cM // 32083 /// NM_001103486	dlg1	FBtr0112813	0.838609	1.00791	2.64e-05	-1.2082	0.925822	0.000265824
8100	18174975	FBtr0074969 // lush // CG8807 gene product from transcript CG8807-RA // 76B9-76B9 // 40	lush	FBtr0074969	0.0133067	-1.30559	2.98e-07	-1.93504	0.0634879	7.41457e-06
8892	18179228	FBtr0302947 // CG3618 // CG3618 gene product from transcript CG3618-RB // 77E8-77E8 //	CG3618	FBtr0302947	0.230389	-1.0864	0.238604	1.0848	0.45487	0.378499
13838	18207491	FBtr0308916 // CG3556 // CG3556 gene product from transcript CG3556-RB // 4C7-4C7 // 31	CG3556	FBtr0308916	0.000340328	-1.32539	0.000716736	-1.30061	0.00370817	0.00372329
10209	18186504	FBtr0083167 // CG4520 // CG4520 gene product from transcript CG4520-RA // 89A3-89A3 //	CG4520	FBtr0083167	0.884544	1.0248	0.00653232	1.62906	0.946971	0.0220838
622	18132590	FBtr0080671 // CSN1a // COP9 complex homolog subunit 1 a // 35B5-35B5 // 34857 /// NM_1	CSN1a	FBtr0080671	0.776268	-1.04089	0.00155329	1.62425	0.895171	0.00691754
15332	18215898	FBtr0074287 // CG9777 // CG9777 gene product from transcript CG9777-RA // 14F2-14F2 //	CG9777	FBtr0074287	0.943053	1.0087	7.7e-05	1.72901	0.976045	0.000630921
6957	18168543	FBtr0076523 // CG5144 // CG5144 gene product from transcript CG5144-RA // 66F3-66F3 //	CG5144	FBtr0076523	0.0718229	1.25285	8.57e-07	2.09777	0.210072	1.71631e-05
3970	18151155	FBtr0086974 // CG9646 // CG9646 gene product from transcript CG9646-RA // 53F2-53F2 //	CG9646	FBtr0086974	0.829946	-1.00868	0.528733	1.02575	0.921334	0.668421
3040	18145617	FBtr0308029 // Shawl // Shaw-like // 30B1-30B2 // 5740840 /// NM_001103661 // Shawl //	Shawl	FBtr0308029	3.63e-05	-1.51245	2.74e-05	-1.52522	0.000610813	0.00027437
4543	18154159	FBtr0091692 // CG33704 // CG33704 gene product from transcript CG33704-RA // 57B5-57B5	CG33704	FBtr0091692	6.7e-05	1.80238	2.77e-09	2.8639	0.000998698	1.48723e-07
5096	18157620	FBtr0087888 // Sin3A // CG8815 gene product from transcript CG8815-RC // 49B5-49B7 // 3	Sin3A	FBtr0087888	0.000244898	-1.17026	5.05e-07	-1.2707	0.00287157	1.14006e-05
7382	18170645	FBtr0331398 // CG12768 // CG12768 gene product from transcript CG12768-RD // 80B2-80B3	CG12768	FBtr0331398	0.00139198	-1.26117	0.904209	-1.00805	0.0111422	0.941031
5593	18160694	NM_137330 // ste24b // ste24b prenyl protease type I // 53E4-53E4 // 36907 /// FBtr0087	ste24b	NM_137330	0.158332	-1.22474	0.00173758	1.61727	0.35893	0.00753675
11411	18193524	NM_080504 // Ubx // Ultrabithorax // 89D6-89D9|3-58.8 cM // 42034 /// FBtr0083347 // Ub	Ubx	NM_080504	0.154182	-1.21552	0.0384255	-1.33501	0.352713	0.0913193
3102	18146064	FBtr0330643 // CG42399 // CG42399 gene product from transcript CG42399-RC // 21B3-21B3	CG42399	FBtr0330643	0.00674489	-1.221	0.00695512	-1.21997	0.0380889	0.0232626
6026	18162944	FBtr0088772 // hubl // hug-bell // 44C4-44C4 // 246567 /// NM_165603 // hubl // hug-bel	hubl	FBtr0088772	0.0163876	-1.46067	0.122914	1.26712	0.0737464	0.229071
973	18134455	FBtr0079773 // CG13108 // CG13108 gene product from transcript CG13108-RA // 30A2-30A2	CG13108	FBtr0079773	0.0453298	-1.18807	0.00164367	-1.32969	0.152686	0.00720988
9252	18180857	FBtr0332674 // sls // sallimus // 62C2-62C4 // 44013 /// NM_001274375 // sls // sallimu	sls	FBtr0332674	0.000283669	-1.20929	5.36e-09	-1.44804	0.00321308	2.58071e-07
12756	18201054	FBtr0085585 // CG31029 // CG31029 gene product from transcript CG31029-RA // 99D8-99D8	CG31029	FBtr0085585	0.281118	-1.269	0.0947383	1.45402	0.512213	0.186528
8403	18176671	FBtr0077007 // CG13300 // CG13300 gene product from transcript CG13300-RA // 65A14-65A1	CG13300	FBtr0077007	0.0720128	-1.14218	0.557005	-1.04329	0.210493	0.693315
9034	18179915	FBtr0075905 // CG32117 // CG32117 gene product from transcript CG32117-RA // 69F1-69F1	CG32117	FBtr0075905	0.50173	-1.13548	0.0213258	1.57351	0.7219	0.0574294
4134	18152064	FBtr0071668 // CG15676 // CG15676 gene product from transcript CG15676-RA // 57F8-57F8	CG15676	FBtr0071668	0.996948	1.00061	0.0166023	1.49652	0.998784	0.047062
2224	18141226	FBtr0330200 // erm // earmuff // 22B6-22B8 // 326152 /// NM_134787 // erm // earmuff //	erm	FBtr0330200	0.362598	-1.09581	0.355239	-1.09738	0.59663	0.506748
6170	18163719	FBtr0112426 // CG34232 // CG34232 gene product from transcript CG34232-RA // 48E4-48E4	CG34232	FBtr0112426	0.790694	1.02233	0.00927684	-1.25716	0.903508	0.0294337
2650	18143639	FBtr0080971 // beat-IIIc // CG15138 gene product from transcript CG15138-RA // 36C2-36C	beat-IIIc	FBtr0080971	0.000712863	-1.27268	6.42e-06	-1.41603	0.00656252	8.57506e-05
8643	18177958	FBtr0333028 // CG17364 // CG17364 gene product from transcript CG17364-RF // 70C9-70C10	CG17364	FBtr0333028	0.0567711	-1.16192	0.070088	-1.1529	0.178815	0.147154
12087	18197461	FBtr0083038 // CG6912 // CG6912 gene product from transcript CG6912-RA // 88E2-88E2 //	CG6912	FBtr0083038	5.92e-13	-4.22217	8.46e-15	-5.4426	1.40038e-10	3.28772e-12
7236	18169894	FBtr0300049 // CG18234 // CG18234 gene product from transcript CG18234-RC // 75D3-75D3	CG18234	FBtr0300049	0.353468	-1.13434	0.493154	1.09724	0.588765	0.638071
10835	18189955	FBtr0301022 // CG31106 // CG31106 gene product from transcript CG31106-RB // 96C5-96C6	CG31106	FBtr0301022	0.000565753	-2.10224	0.00443825	-1.81032	0.005477	0.0161735
9269	18181033	FBtr0300506 // CG42397 // CG42397 gene product from transcript CG42397-RA // 68E4-68E4	CG42397	FBtr0300506	0.00159334	2.19988	0.00742389	1.9208	0.0123546	0.0245339
10007	18185450	FBtr0082085 // CG32939 // CG32939 gene product from transcript CG32939-RA // 85E4-85E4	CG32939	FBtr0082085	0.967138	1.00191	0.333077	-1.04631	0.986417	0.483372
10942	18190538	FBtr0082085 // CG32939 // CG32939 gene product from transcript CG32939-RA // 85E4-85E4	CG32939	FBtr0082085	0.967138	1.00191	0.333077	-1.04631	0.986417	0.483372
13026	18202625	FBtr0299662 // 5PtaseI // CG42283 gene product from transcript CG42283-RB // 96B17-96B1	5PtaseI	FBtr0299662	0.719237	1.02232	0.000105142	-1.31046	0.86351	0.000809494
1040	18134860	FBtr0080098 // CG6138 // CG6138 gene product from transcript CG6138-RA // 32A1-32A1 //	CG6138	FBtr0080098	0.983814	1.00243	0.000579404	1.57582	0.993693	0.00313354
8990	18179696	NM_001144490 // frc // fringe connection // 74B5-74C1 // 39943 /// FBtr0299819 // CG321	frc	NM_001144490	0.973232	-1.00171	0.228456	-1.06401	0.988781	0.366833
4651	18154443	FBtr0112403 // CG34210 // CG34210 gene product from transcript CG34210-RA // 59D7-59D8	CG34210	FBtr0112403	0.299185	1.2122	0.000904417	1.95222	0.53253	0.00449236
8457	18176954	FBtr0076723 // CG7387 // CG7387 gene product from transcript CG7387-RA // 66B11-66B11 /	CG7387	FBtr0076723	0.457106	1.14538	0.000996214	1.92553	0.684988	0.00483791
12393	18199196	NM_206555 // Myo95E // Myosin 95E // 95E6-95E6 // 2768680 /// NM_001032037 // Myo95E //	Myo95E	NM_206555	0.820205	-1.01397	0.021355	-1.15806	0.916505	0.0574552
8788	18178660	FBtr0075132 // CG5103 // CG5103 gene product from transcript CG5103-RA // 75C3-75C3 //	CG5103	FBtr0075132	0.197677	1.20774	1.29e-05	2.10115	0.414342	0.000149754
1411	18136867	FBtr0300460 // CG31909 // CG31909 gene product from transcript CG31909-RC // 27E7-27E7	CG31909	FBtr0300460	0.0260042	1.45338	3.11e-08	3.22165	0.103421	1.11319e-06
8695	18178179	FBtr0100037 // pHCl // CG44099 gene product from transcript CG44099-RL // 72A2-72A4 //	pHCl	FBtr0100037	4.12e-06	-1.30113	0.000182994	-1.22203	0.000101064	0.00125814
15625	18217424	FBtr0071374 // CG32700 // CG32700 gene product from transcript CG32700-RA // 8E4-8E7 //	CG32700	FBtr0071374	0.328562	-1.04642	1.74e-05	1.26105	0.563733	0.000188706
8579	18177629	FBtr0076067 // CG5883 // CG5883 gene product from transcript CG5883-RA // 68E3-68E3 //	CG5883	FBtr0076067	0.007472	1.33778	0.0327312	1.25517	0.041202	0.0805547
2372	18141999	FBtr0331225 // CG9497 // CG9497 gene product from transcript CG9497-RB // 26C3-26C3 //	CG9497	FBtr0331225	0.424715	-1.0738	0.00129927	-1.36517	0.654846	0.00598721
11721	18195429	FBtr0111206 // CG14636 // CG14636 gene product from transcript CG14636-RA // 81F6-82A1	CG14636	FBtr0111206	0.948137	-1.00524	0.000616217	-1.35496	0.978328	0.00328588
5033	18157144	FBtr0087073 // Psi // P-element somatic inhibitor // 53D14-53D14 // 36889 /// NM_166200	Psi	FBtr0087073	0.135352	1.05896	0.288018	-1.04122	0.325158	0.435127
8900	18179267	FBtr0078310 // CG10510 // CG10510 gene product from transcript CG10510-RA // 78C2-78C2	CG10510	FBtr0078310	0.575152	1.07618	0.000200985	1.72649	0.774685	0.00135725
1281	18136116	FBtr0305492 // ACXA // CG17176 gene product from transcript CG17176-RE // 34A2-34A2 //	ACXA	FBtr0305492	0.151145	1.2376	7.4e-06	2.17704	0.348543	9.57074e-05
14897	18213644	NM_166876 // DAAM // Dishevelled Associated Activator of Morphogenesis // 1F2-1F3 // 31	DAAM	NM_166876	0.641996	-1.0321	0.0035861	-1.23627	0.81948	0.0135711
1023	18134734	FBtr0080004 // dpr19 // CG13140 gene product from transcript CG13140-RB // 31D11-31D11	dpr19	FBtr0080004	0.427397	1.08266	0.569377	1.05843	0.657668	0.703031
10294	18186890	FBtr0083569 // CG18598 // CG18598 gene product from transcript CG18598-RA // 90F10-90F1	CG18598	FBtr0083569	0.0188983	1.21188	0.0170408	1.21605	0.0821241	0.0480214
6240	18164243	FBtr0301258 // CG42559 // CG42559 gene product from transcript CG42559-RA // 59F4-59F4	CG42559	FBtr0301258	0.00408251	-1.52297	0.00766682	1.4723	0.0258876	0.0251584
15033	18214419	FBtr0114466 // Tsp5D // Tetraspanin 5D // 5D3-5D3 // 31540 /// FBtr0331169 // Tsp5D //	Tsp5D	FBtr0114466	0.0360037	-1.19529	5.18e-05	-1.46492	0.131055	0.000460752
11750	18195565	FBtr0078801 // CG14668 // CG14668 gene product from transcript CG14668-RA // 83A1-83A1	CG14668	FBtr0078801	0.0323732	-1.31363	0.00304697	1.47908	0.121277	0.0118632
2645	18143613	FBtr0332333 // CG13284 // CG13284 gene product from transcript CG13284-RD // 36B2-36B2	CG13284	FBtr0332333	0.0160692	-1.19653	2.07e-06	-1.50651	0.0728357	3.48315e-05
5460	18160011	FBtr0087780 // CG3955 // CG3955 gene product from transcript CG3955-RA // 49F2-49F2 //	CG3955	FBtr0087780	0.200491	-1.09046	0.805769	1.01656	0.41804	0.8766
14895	18213624	FBtr0070161 // CG13366 // CG13366 gene product from transcript CG13366-RA // 1B11-1B12	CG13366	FBtr0070161	0.674729	1.01664	0.000203834	-1.17815	0.838759	0.00137252
15642	18217524	FBtr0307050 // Muc4B // Mucin 4B // 4B4-4B4 // 31368 /// NM_167006 // Muc4B // Mucin 4B	Muc4B	FBtr0307050	2.63e-19	-21.6404	2.9e-17	-13.5529	4.06566e-16	2.49125e-14
800	18133519	FBtr0273188 // CG10019 // CG10019 gene product from transcript CG10019-RC // 24C2-24C3	CG10019	FBtr0273188	0.344891	1.06782	0.805056	1.01718	0.579962	0.876263
10853	18190103	FBtr0082480 // CG31211 // CG31211 gene product from transcript CG31211-RB // 87A2-87A2	CG31211	FBtr0082480	0.241607	-1.04912	0.000689037	-1.16352	0.468963	0.00360579
9866	18184735	FBtr0078645 // CG14676 // CG14676 gene product from transcript CG14676-RA // 83C5-83C5	CG14676	FBtr0078645	0.395296	1.13213	1.13e-05	2.12089	0.629097	0.000134137
15171	18215041	NM_078567 // Or10a // Odorant receptor 10a // 10B10-10B10 // 32086 /// FBtr0073548 // O	Or10a	NM_078567	0.17667	-1.12742	0.631066	-1.04297	0.385761	0.75135
3214	18146593	FBtr0306920 // CG43339 // CG43339 gene product from transcript CG43339-RB // 36F10-36F1	CG43339	FBtr0306920	0.000122587	1.67069	4.74e-11	3.15893	0.00163011	5.44833e-09
9324	18181437	FBtr0091474 // scaf6 // CG33522 gene product from transcript CG33522-RD // 73E5-73E5 //	scaf6	FBtr0091474	0.181598	1.04877	0.048009	-1.07437	0.392744	0.109185
6493	18165639	FBtr0334114 // msopa // male-specific opa containing gene // 79B3-79B3 // 45962 /// FBt	msopa	FBtr0334114	0.00247503	2.02718	1e-05	3.09457	0.0174578	0.000122538
6120	18163498	FBtr0100095 // CG34040 // CG34040 gene product from transcript CG34040-RA // 58A2-58A2	CG34040	FBtr0100095	0.224688	-1.37374	0.423325	1.23117	0.448168	0.574793
10285	18186859	FBtr0083540 // CG7794 // CG7794 gene product from transcript CG7794-RA // 90E1-90E1 //	CG7794	FBtr0083540	0.00232837	-1.6318	0.822456	1.03397	0.0166817	0.887743
7472	18171109	FBtr0076466 // CG32043 // CG32043 gene product from transcript CG32043-RA // 67B8-67B9	CG32043	FBtr0076466	0.500339	-1.03128	0.0921063	-1.08168	0.720788	0.182358
6432	18165272	FBtr0300103 // CG17684 // CG17684 gene product from transcript CG17684-RC // --- // 335	CG17684	FBtr0300103	0.927666	1.01105	0.0866264	-1.23667	0.968064	0.173529
14703	18212406	FBtr0070562 // rst // roughest // 3C3-3C4|1-2.2 cM // 31290 /// NM_080319 // rst // rou	rst	FBtr0070562	0.287908	1.08844	0.198045	-1.10858	0.519539	0.330093
2830	18144619	FBtr0081491 // CG31624 // CG31624 gene product from transcript CG31624-RA // 39B1-39B1	CG31624	FBtr0081491	0.626019	1.10288	0.00878978	1.74436	0.808841	0.0282193
11396	18193419	FBtr0085512 // Jon99Cii // Jonah 99Cii // 99C7-99C7 // 43544 /// FBtr0085512 // Jon99Ci	Jon99Cii	FBtr0085512	0.107085	-1.54184	5.99e-05	-3.35653	0.277871	0.000517843
10819	18189857	FBtr0300983 // CG31021 // CG31021 gene product from transcript CG31021-RB // 100A1-100A	CG31021	FBtr0300983	0.0332146	-1.36736	0.00394207	-1.54853	0.123492	0.0146633
2899	18144973	FBtr0079425 // CG31907 // CG31907 gene product from transcript CG31907-RA // 27D7-27D7	CG31907	FBtr0079425	0.370473	-1.16803	0.00406249	1.6996	0.605291	0.0150426
2711	18143943	FBtr0329963 // CG10188 // CG10188 gene product from transcript CG10188-RB // 37E4-37E5	CG10188	FBtr0329963	0.0952581	-1.12831	0.000349044	-1.32547	0.256637	0.00209683
1050	18134900	FBtr0080113 // CG12299 // CG12299 gene product from transcript CG12299-RA // 32A5-32A5	CG12299	FBtr0080113	0.152382	1.09529	0.0268495	1.15507	0.350307	0.0688728
15418	18216330	FBtr0074698 // Inx5 // Innexin 5 // 18A4-18A4 // 32901 /// NM_133125 // Inx5 // Innexin	Inx5	FBtr0074698	0.478587	-1.10459	0.004165	1.53579	0.703422	0.0153456
10478	18187945	FBtr0084550 // CG6178 // CG6178 gene product from transcript CG6178-RA // 95E5-95E6 //	CG6178	FBtr0084550	0.00586572	1.11559	0.00112496	-1.14191	0.0341775	0.00533147
6411	18165127	NR_073891 // CR43812 // ncRNA // 56F11-56F11 // 14462610	CR43812	NR_073891	0.470459	1.10648	0.000747755	1.67855	0.695735	0.00385741
14204	18209366	FBtr0074322 // CG13008 // CG13008 gene product from transcript CG13008-RA // 15A3-15A3	CG13008	FBtr0074322	0.774809	1.03092	0.000203433	1.55912	0.894555	0.00137038
11969	18196803	FBtr0082513 // Cad87A // Cadherin 87A // 87A1-87A2 // 41441 /// NM_169440 // Cad87A //	Cad87A	FBtr0082513	0.0237739	-1.15459	4.04e-05	-1.33504	0.0968883	0.000374877
4920	18156262	FBtr0112809 // kn // knot // 51C2-51C3|2-72.3 cM // 45318 /// NM_166070 // kn // knot /	kn	FBtr0112809	0.969698	1.00271	0.480844	-1.05171	0.987485	0.62704
11994	18196977	FBtr0082610 // Tim17a1 // CG10090 gene product from transcript CG10090-RA // 87B8-87B8	Tim17a1	FBtr0082610	0.491163	-1.10039	0.00039846	1.72449	0.71299	0.00232357
14982	18214168	FBtr0070564 // CG14419 // CG14419 gene product from transcript CG14419-RA // 3C2-3C2 //	CG14419	FBtr0070564	0.00303529	-1.34068	0.021961	-1.24596	0.0205739	0.0586081
11436	18193698	FBtr0083644 // fru // fruitless // 91A6-91B3 // 42226 /// FBtr0083640 // fru // fruitle	fru	FBtr0083644	0.0925223	-1.10703	0.0885462	-1.1085	0.251476	0.176638
10190	18186405	NM_001043246 // Gyc88E // Guanylyl cyclase at 88E // 88E2-88E2 // 41825 /// NM_00126018	Gyc88E	NM_001043246	8.25e-05	-1.42753	0.0141078	-1.22685	0.00117913	0.0412962
5675	18161134	FBtr0113097 // endoB // endophilin B // 56C10-56C10 // 37218 /// NM_001103905 // endoB	endoB	FBtr0113097	0.0122157	1.20862	0.403447	1.06216	0.0595702	0.555467
6348	18164816	NM_079065 // 5-HT1B // Serotonin receptor 1B // 56B1-56B1 // 37191 /// NM_001144236 //	5-HT1B	NM_079065	0.479262	1.05986	0.0012175	1.33517	0.703788	0.00568846
11370	18193256	NM_079622 // Mst87F // Male-specific RNA 87F // 87F14-87F14 // 41693 /// FBtr0082884 //	Mst87F	NM_079622	0.510928	-1.12676	0.00210631	1.82599	0.729173	0.0088084
5936	18162532	FBtr0300762 // CG12699 // CG12699 gene product from transcript CG12699-RB // 54B1-54B1	CG12699	FBtr0300762	0.992153	-1.00338	0.708378	1.13689	0.996488	0.810241
1217	18135721	FBtr0081381 // CG15475 // CG15475 gene product from transcript CG15475-RA // 38D1-38D1	CG15475	FBtr0081381	0.631808	-1.04349	1.94e-06	1.67128	0.811806	3.30529e-05
2658	18143678	FBtr0080994 // CG6412 // CG6412 gene product from transcript CG6412-RA // 36C10-36C10 /	CG6412	FBtr0080994	0.286451	-1.07309	0.0250678	1.16547	0.517826	0.065142
71	18130123	---	NA	---	0.00827858	-1.19927	0.0538786	-1.13778	0.0444045	0.119615
7507	18171339	FBtr0075147 // CG32192 // CG32192 gene product from transcript CG32192-RB // 75B4-75B4	CG32192	FBtr0075147	0.767106	-1.05822	0.014622	1.63211	0.890707	0.0425495
11909	18196416	FBtr0082195 // CG6208 // CG6208 gene product from transcript CG6208-RA // 85F13-85F13 /	CG6208	FBtr0082195	0.397882	1.07554	0.556216	1.05184	0.63165	0.692597
7197	18169713	FBtr0075336 // CG13029 // CG13029 gene product from transcript CG13029-RC // 73D3-73D3	CG13029	FBtr0075336	0.968516	1.00721	0.00408773	1.75082	0.98713	0.0151087
5683	18161189	FBtr0086481 // CG15128 // CG15128 gene product from transcript CG15128-RA // 56E2-56E2	CG15128	FBtr0086481	0.914464	1.01742	0.000265144	1.92762	0.960981	0.00168589
15633	18217477	FBtr0071059 // CG32726 // CG32726 gene product from transcript CG32726-RA // 7B2-7B2 //	CG32726	FBtr0071059	0.827262	1.02224	0.0282622	-1.25862	0.920107	0.0715631
5006	18156917	FBtr0088164 // zetaTry // zetaTrypsin // 47F3-47F3 // 36216 /// NM_078967 // zetaTry //	zetaTry	FBtr0088164	0.856812	-1.02734	0.00045274	-1.78862	0.933945	0.0025712
13236	18203810	FBtr0302251 // CG40155 // CG40155 gene product from transcript CG40155-RB // --- // 335	CG40155	FBtr0302251	0.307284	-1.11205	0.000113594	1.57118	0.541909	0.000863568
11351	18193100	FBtr0085598 // janB // janus B // 99D3-99D3 // 43568 /// NM_057236 // janB // janus B /	janB	FBtr0085598	0.959104	1.00965	0.000657068	2.02171	0.982675	0.00346852
15098	18214689	FBtr0071185 // CG2278 // CG2278 gene product from transcript CG2278-RA // 7D17-7D17 //	CG2278	FBtr0071185	0.0594287	-1.12629	0.000929021	-1.24916	0.184655	0.00458943
4451	18153675	FBtr0273316 // CG30275 // CG30275 gene product from transcript CG30275-RH // 59A3-59A3	CG30275	FBtr0273316	0.488133	-1.09605	0.00411081	1.49936	0.710542	0.0151768
9016	18179817	FBtr0076310 // dpr10 // CG32057 gene product from transcript CG32057-RB // 67D9-67D10 /	dpr10	FBtr0076310	0.00384365	-1.29119	7.84e-07	-1.65466	0.024612	1.60156e-05
10079	18185781	FBtr0082429 // CG12594 // CG12594 gene product from transcript CG12594-RB // 86E16-86E1	CG12594	FBtr0082429	0.119919	1.14145	0.00724491	-1.26848	0.299467	0.0240446
12997	18202418	NR_002491 // snoRNA:Psi28S-3186 // ncRNA // 83B4-83B4 // 3772266	snoRNA:Psi28S-3186	NR_002491	5.67e-19	-2.12193	4.69e-18	-2.01112	7.71215e-16	4.78439e-15
11459	18193867	NM_057587 // Rbp4 // RNA-binding protein 4 // 87F7-87F7 // 41668 /// FBtr0082853 // Rbp	Rbp4	NM_057587	0.025776	1.38794	0.000418179	1.73857	0.102671	0.00241201
14268	18209704	FBtr0074663 // CG14190 // CG14190 gene product from transcript CG14190-RA // 18A2-18A2	CG14190	FBtr0074663	0.478129	-1.11862	0.00122796	1.74262	0.703002	0.00572814
7237	18169903	FBtr0304702 // CG18233 // CG18233 gene product from transcript CG18233-RB // 75D3-75D4	CG18233	FBtr0304702	0.92644	-1.01254	0.673042	1.05868	0.967689	0.783836
1712	18138248	NR_037728 // CR42874 // ncRNA // 22B8-22B8 // 10178915	CR42874	NR_037728	0.112621	1.15903	0.526252	-1.05965	0.287398	0.666058
8226	18175754	NM_138236 // Trh // Tryptophan hydroxylase // 61F3-61F3 // 38121 /// FBtr0072638 // Trh	Trh	NM_138236	0.0050999	1.30095	0.271162	1.10273	0.0306031	0.416909
3376	18147512	NM_057501 // Src42A // Src oncogene at 42A // 42A6-42A7 // 35524 /// FBtr0085968 // Src	Src42A	NM_057501	2.54e-05	-1.15275	3.07e-07	-1.20526	0.000459622	7.61528e-06
13960	18208111	FBtr0071166 // CG2147 // CG2147 gene product from transcript CG2147-RA // 7D22-7D22 //	CG2147	FBtr0071166	0.0130183	-1.13434	0.0407703	1.10753	0.0625574	0.0958037
15349	18215971	FBtr0074417 // CG13001 // CG13001 gene product from transcript CG13001-RA // 15C4-15C4	CG13001	FBtr0074417	0.000829043	1.26765	0.00092973	-1.26424	0.00743905	0.00459016
11946	18196646	FBtr0082405 // CG6723 // CG6723 gene product from transcript CG6723-RA // 86E4-86E5 //	CG6723	FBtr0082405	0.167219	-1.12273	0.00219352	-1.3144	0.371188	0.00910777
12360	18199002	FBtr0299867 // CG17380 // CG17380 gene product from transcript CG17380-RB // 94F1-94F1	CG17380	FBtr0299867	0.283019	1.16457	0.0033036	1.55882	0.514357	0.0126576
7576	18171666	FBtr0300619 // CG32457 // CG32457 gene product from transcript CG32457-RB // 80C2-80C2	CG32457	FBtr0300619	0.000630793	-1.55304	0.496947	1.08284	0.00597551	0.641554
7918	18173682	FBtr0332830 // CG43897 // CG43897 gene product from transcript CG43897-RL // 67C9-67C10	CG43897	FBtr0332830	0.186634	1.07158	0.478225	-1.03743	0.399559	0.624693
8610	18177819	FBtr0075946 // CG10969 // CG10969 gene product from transcript CG10969-RA // 69E2-69E2	CG10969	FBtr0075946	0.817925	1.03744	0.00107812	1.76962	0.915635	0.00516195
8383	18176566	FBtr0077113 // mad2 // CG17498 gene product from transcript CG17498-RA // 64E11-64E12 /	mad2	FBtr0077113	0.0445445	1.19319	5.92e-07	1.69519	0.15114	1.28835e-05
4183	18152248	FBtr0309799 // CG13510 // CG13510 gene product from transcript CG13510-RB // 58F4-58F4	CG13510	FBtr0309799	0.798831	1.02364	0.0665028	1.18869	0.906964	0.141225
2516	18142949	FBtr0080073 // Hand // CG18144 gene product from transcript CG18144-RA // 31C6-31C7 //	Hand	FBtr0080073	0.0785995	1.24497	0.790352	-1.03283	0.223619	0.865978
5083	18157502	NM_176110 // Pkn // Protein kinase related to protein kinase N // 45C1-45C1 // 35950 //	Pkn	NM_176110	0.00133379	-1.17992	0.000150372	-1.22447	0.0107933	0.00108074
588	18132362	FBtr0081258 // msb1l // CG10364 gene product from transcript CG10364-RA // 37F2-37F2 //	msb1l	FBtr0081258	0.458343	1.11167	1.62e-05	2.05218	0.685457	0.000178419
1422	18136899	FBtr0077591 // CG31952 // CG31952 gene product from transcript CG31952-RA // 23F1-23F1	CG31952	FBtr0077591	0.919138	-1.01701	0.00480123	1.65001	0.963307	0.0172119
3610	18149074	NM_136347 // Src42A // Src oncogene at 42A // 42A6-42A7 // 35524	Src42A	NM_136347	0.237324	-1.05213	3.45e-05	-1.22611	0.463682	0.000331436
1134	18135307	FBtr0329944 // CG17912 // CG17912 gene product from transcript CG17912-RF // 36A14-36A1	CG17912	FBtr0329944	0.572935	-1.01805	0.00249204	-1.10884	0.772835	0.010122
13696	18206667	FBtr0070088 // arg // arginase // 1B7-1B8 // 46717 /// NM_080136 // arg // arginase //	arg	FBtr0070088	0.00515766	1.48016	0.565701	1.07858	0.0308723	0.700187
9760	18184102	NM_080493 // npf // neuropeptide F // 89D5-89D5 // 42018 /// NM_001275714 // npf // neu	npf	NM_080493	0.552735	1.04964	0.753377	-1.02592	0.760437	0.84022
6744	18167247	FBtr0334072 // CG13921 // CG13921 gene product from transcript CG13921-RF // 62B1-62B1	CG13921	FBtr0334072	0.431628	1.07124	0.464532	-1.06605	0.661692	0.612461
13523	18205376	FBtr0070378 // csw // corkscrew // 2D1-2D2|1-1 cM // 45278 /// FBtr0333260 // csw // co	csw	FBtr0070378	0.369003	-1.03715	0.198917	-1.05392	0.603857	0.331062
2528	18143037	FBtr0080043 // CG5337 // CG5337 gene product from transcript CG5337-RA // 31E2-31E2 //	CG5337	FBtr0080043	0.447051	-1.0699	0.0278189	-1.22448	0.676127	0.0707256
13852	18207552	FBtr0300018 // CG12680 // CG12680 gene product from transcript CG12680-RB // 4E1-4E1 //	CG12680	FBtr0300018	0.27845	-1.20061	0.0154893	1.52899	0.509971	0.0445178
10038	18185597	FBtr0301310 // Cap-H2 // Chromosome associated protein H2 // 86C5-86C6|3-49 cM // 41289	Cap-H2	FBtr0301310	0.826717	1.01023	0.000461717	-1.19785	0.920048	0.00261399
11605	18194807	FBtr0306742 // NK7.1 // CG8524 gene product from transcript CG8524-RC // 88B4-88B6 // 4	NK7.1	FBtr0306742	0.567027	1.03299	0.272354	-1.06469	0.76897	0.418112
6463	18165437	FBtr0333057 // ImpE1 // Ecdysone-inducible gene E1 // 66C8-66C10 // 45879 /// FBtr00766	ImpE1	FBtr0333057	0.0989327	-1.15168	0.506685	1.05735	0.263804	0.648891
6496	18165645	FBtr0072630 // LysE // Lysozyme E // 61F3-61F3 // 38128 /// NM_057479 // LysE // Lysozy	LysE	FBtr0072630	0.00685479	1.39252	0.0277697	-1.30203	0.0385408	0.0706338
4069	18151704	FBtr0086470 // CG15124 // CG15124 gene product from transcript CG15124-RA // 56E1-56E1	CG15124	FBtr0086470	0.0711315	1.39974	1.33e-07	3.39227	0.208493	3.73636e-06
474	18131607	NM_057748 // Rh5 // Rhodopsin 5 // 33B8-33B8 // 34615 /// FBtr0080291 // Rh5 // Rhodops	Rh5	NM_057748	0.000715454	-1.52003	9.35e-06	-1.8034	0.00657895	0.000115702
13142	18203304	FBtr0304878 // CG43094 // CG43094 gene product from transcript CG43094-RA // 94C4-94C4	CG43094	FBtr0304878	0.000194554	-1.43262	0.000785277	-1.3726	0.00237333	0.00401167
4118	18151941	FBtr0071567 // CG9394 // CG9394 gene product from transcript CG9394-RA // 57C1-57C1 //	CG9394	FBtr0071567	0.272519	1.08331	0.12875	-1.11828	0.504003	0.237399
1241	18135825	FBtr0330679 // CG8671 // CG8671 gene product from transcript CG8671-RD // 39C1-39C1 //	CG8671	FBtr0330679	0.0696763	-1.07784	0.457703	-1.03045	0.205838	0.606678
5860	18162072	FBtr0072285 // CG4049 // CG4049 gene product from transcript CG4049-RA // 60B10-60B10 /	CG4049	FBtr0072285	0.991694	-1.00042	0.00236067	-1.14237	0.996272	0.00967008
14312	18209970	FBtr0077297 // CG1631 // CG1631 gene product from transcript CG1631-RA // 19C4-19C4 //	CG1631	FBtr0077297	0.827844	-1.03693	0.00280234	1.71064	0.920441	0.0110911
5317	18159156	FBtr0088661 // CG8197 // CG8197 gene product from transcript CG8197-RA // 45A1-45A1 //	CG8197	FBtr0088661	0.535146	1.08311	0.00013337	1.74181	0.747498	0.000981372
10137	18186091	FBtr0290037 // CG8773 // CG8773 gene product from transcript CG8773-RB // 87E4-87E4 //	CG8773	FBtr0290037	0.75078	-1.06661	0.0705197	-1.45777	0.882844	0.14787
5134	18157867	FBtr0087071 // CG8910 // CG8910 gene product from transcript CG8910-RA // 53D15-53E1 //	CG8910	FBtr0087071	2.27e-07	-1.82877	1.74e-06	-1.71222	8.82165e-06	3.03422e-05
13585	18205930	NM_206600 // su(w[a]) // suppressor of white-apricot // 1E1-1E1|1-0.1 cM // 31054 /// F	su(w[a])	NM_206600	0.00174638	1.13019	0.102169	-1.06202	0.0132332	0.197888
6879	18168074	FBtr0077003 // CG8219 // CG8219 gene product from transcript CG8219-RA // 65A8-65A8 //	CG8219	FBtr0077003	0.792525	1.03474	0.000489737	1.65067	0.904045	0.00274125
15890	18218902	NR_047791 // CR43497 // ncRNA // 8E4-8E4 // 12797959	CR43497	NR_047791	0.00142771	-1.34281	0.301294	-1.09253	0.0113507	0.449515
6489	18165600	NM_001275278 // Csp // Cysteine string protein // 79D3-79D3 // 40459 /// NM_079489 // C	Csp	NM_001275278	0.0502638	-1.0721	0.00973232	-1.09874	0.164278	0.0306425
13753	18207002	FBtr0301696 // X11L // CG5675 gene product from transcript CG5675-RB // 16B7-16B7 // 25	X11L	FBtr0301696	0.038174	-1.0843	0.000157978	-1.17433	0.13658	0.00112305
1017	18134695	FBtr0333097 // GATAd // CG5034 gene product from transcript CG5034-RB // 31D9-31D9 // 3	GATAd	FBtr0333097	0.747016	-1.01204	0.713346	-1.01373	0.880484	0.813326
14389	18210369	FBtr0074644 // CG32544 // CG32544 gene product from transcript CG32544-RA // 17F1-17F1	CG32544	FBtr0074644	0.248112	1.10073	0.0729634	-1.16338	0.477051	0.151844
[truncated: 14,323 more rows]

## Sheet: Upregulated
pre	Probeset ID	gene_assignment	Gene_Symbol	RefSeq	p_val_Whole_3days	Fold_Change_Pink1_W_3d vs_ Control_W_3d	p_val_Whole_30days	Fold_Change_Pink1_W_30d vs_ Control_W_30d	p_Adj_BH_day3	p_Adj_BH_day30
12231	18198290	FBtr0083741 // CG5217 // CG5217 gene product from transcript CG5217-RA // 91F12-91F12 /	CG5217	FBtr0083741	0.479904	1.10159	2.63e-06	2.17202	0.704089	4.26285e-05
6344	18164807	FBtr0306912 // CG43327 // CG43327 gene product from transcript CG43327-RA // 53E10-53E1	CG43327	FBtr0306912	0.389867	1.08637	3.59e-09	2.16282	0.62466	1.83686e-07
6345	18164809	FBtr0306912 // CG43327 // CG43327 gene product from transcript CG43327-RA // 53E10-53E1	CG43327	FBtr0306912	0.389867	1.08637	3.59e-09	2.16282	0.62466	1.83686e-07
3994	18151279	FBtr0086859 // CG10934 // CG10934 gene product from transcript CG10934-RA // 54E1-54E2	CG10934	FBtr0086859	0.0205675	1.37787	3.55e-07	2.32907	0.0872553	8.62249e-06
14071	18208665	FBtr0073644 // CG2574 // CG2574 gene product from transcript CG2574-RA // 11A9-11A9 //	CG2574	FBtr0073644	0.0617518	1.25947	7.85e-08	2.29481	0.189493	2.42666e-06
4046	18151556	FBtr0086574 // CG15109 // CG15109 gene product from transcript CG15109-RC // 56B2-56B2	CG15109	FBtr0086574	0.0103064	1.40109	5.77e-08	2.39982	0.052438	1.86491e-06
1406	18136851	FBtr0080099 // CG31872 // CG31872 gene product from transcript CG31872-RA // 32A2-32A2	CG31872	FBtr0080099	0.013515	1.52689	9.83e-06	2.34426	0.0641628	0.000120817
1089	18135072	FBtr0080354 // CG17010 // CG17010 gene product from transcript CG17010-RA // 33E1-33E1	CG17010	FBtr0080354	0.00765629	1.27774	2.05e-10	2.21167	0.041747	1.77979e-08
12333	18198842	FBtr0084330 // CG4907 // CG4907 gene product from transcript CG4907-RA // 94C2-94C2 //	CG4907	FBtr0084330	0.0742769	1.23091	6.44e-08	2.20985	0.215452	2.04421e-06
3132	18146244	FBtr0333233 // Sfp26Ad // Seminal fluid protein 26Ad // 26A3-26A3 // 8673981 /// FBtr03	Sfp26Ad	FBtr0333233	1.54e-07	2.43565	4.02e-09	2.90876	6.5458e-06	2.03141e-07
2330	18141765	FBtr0079092 // CG7742 // CG7742 gene product from transcript CG7742-RA // 25C10-25D1 //	CG7742	FBtr0079092	0.0115009	1.28379	6.42e-10	2.26359	0.0569186	4.47809e-08
10074	18185768	FBtr0082423 // CG14715 // CG14715 gene product from transcript CG14715-RA // 86E15-86E1	CG14715	FBtr0082423	4.67e-25	6.25431	7.67e-22	4.17941	1.90559e-21	2.45918e-18
3469	18148137	NM_143761 // Cyp6a17 // Cytochrome P450-6a17 // 51D1-51D1 // 45556 /// FBtr0087451 // C	Cyp6a17	NM_143761	4.42e-25	169.383	6.1e-25	160.337	1.90559e-21	3.31881e-21
8966	18179594	FBtr0075802 // CG8750 // CG8750 gene product from transcript CG8750-RA // 70C4-70C4 //	CG8750	FBtr0075802	0.00901625	1.51677	6.14e-07	2.54348	0.0471677	1.32738e-05
7338	18170443	FBtr0078371 // CG7634 // CG7634 gene product from transcript CG7634-RA // 78D6-78D6 //	CG7634	FBtr0078371	0.378071	1.13256	1.2e-05	2.06332	0.613041	0.000140909
532	18132027	NM_165375 // dtr // defective transmitter release // 39D1-39D2 // 318856 /// FBtr008151	dtr	NM_165375	0.371056	1.08219	5.21e-09	2.00256	0.606029	2.53088e-07
6742	18167237	FBtr0072766 // CG12035 // CG12035 gene product from transcript CG12035-RA // 62B1-62B1	CG12035	FBtr0072766	0.333978	1.13353	2.11e-06	2.10008	0.569255	3.53225e-05
5282	18158959	FBtr0088802 // CG2291 // CG2291 gene product from transcript CG2291-RA // 44C3-44C3 //	CG2291	FBtr0088802	0.000450946	1.8425	6.06e-08	3.00872	0.00458588	1.95091e-06
9332	18181493	FBtr0333432 // CG42841 // CG42841 gene product from transcript CG42841-RB // 62C1-62C1	CG42841	FBtr0333432	0.0807532	1.30135	9.1e-06	2.16677	0.228313	0.000113295
2703	18143890	FBtr0081225 // CG17564 // CG17564 gene product from transcript CG17564-RB // 37D2-37D2	CG17564	FBtr0081225	1.31e-07	2.28524	3.77e-12	3.7734	5.70182e-06	6.34371e-10
6202	18163967	FBtr0112411 // whip // whipple // 44C4-44C4 // 5740782 /// NM_001103760 // whip // whip	whip	FBtr0112411	0.508753	1.08134	7.7e-07	2.0566	0.727052	1.58286e-05
8435	18176849	FBtr0076866 // CG14835 // CG14835 gene product from transcript CG14835-RA // 66A1-66A1	CG14835	FBtr0076866	0.0101121	1.49548	4.44e-07	2.54489	0.0516038	1.02503e-05
2827	18144601	FBtr0307507 // CG31601 // CG31601 gene product from transcript CG31601-RC // 40D4-40D5	CG31601	FBtr0307507	0.0253928	1.39906	4.28e-07	2.48673	0.101609	9.93715e-06
4470	18153798	NM_206057 // Mal-A6 // Maltase A6 // 44D1-44D1 // 246565 /// FBtr0273322 // Mal-A6 // M	Mal-A6	NM_206057	3.94e-11	4.73292	1.21e-09	3.81532	5.46372e-09	7.50936e-08
4513	18154010	FBtr0087135 // CG33017 // CG33017 gene product from transcript CG33017-RB // 53A4-53A4	CG33017	FBtr0087135	0.445558	1.11184	3.14e-06	2.17721	0.6749	4.85792e-05
5483	18160121	FBtr0087650 // CG6220 // CG6220 gene product from transcript CG6220-RA // 50C2-50C2 //	CG6220	FBtr0087650	0.0455473	1.36212	4.36e-06	2.27983	0.153188	6.26995e-05
2565	18143235	FBtr0080270 // CG6555 // CG6555 gene product from transcript CG6555-RA // 32F3-32F3 //	CG6555	FBtr0080270	0.0250371	1.57507	6.33e-05	2.43907	0.10058	0.000539803
2824	18144589	FBtr0080270 // CG6555 // CG6555 gene product from transcript CG6555-RA // 32F3-32F3 //	CG6555	FBtr0080270	0.0250371	1.57507	6.33e-05	2.43907	0.10058	0.000539803
5180	18158231	NM_078951 // sut4 // sugar transporter 4 // 46E3-46E4 // 36055 /// FBtr0089674 // sut4	sut4	NM_078951	0.0310553	1.44977	1.58e-05	2.31509	0.11795	0.000175314
10512	18188169	FBtr0084718 // Trf4-2 // CG17462 gene product from transcript CG17462-RA // 96B9-96B9 /	Trf4-2	FBtr0084718	0.3539	1.11981	8.6e-07	2.08843	0.589123	1.7201e-05
2781	18144345	FBtr0333008 // CG15357 // CG15357 gene product from transcript CG15357-RB // 22B6-22B6	CG15357	FBtr0333008	0.00624259	1.35965	2.91e-10	2.59264	0.0359533	2.35134e-08
11012	18190900	FBtr0112469 // CG34274 // CG34274 gene product from transcript CG34274-RA // 89A2-89A2	CG34274	FBtr0112469	0.0435358	1.29889	1.13e-08	2.60013	0.149159	4.80309e-07
795	18133498	FBtr0333251 // CG8851 // CG8851 gene product from transcript CG8851-RC // 23F6-23F6 //	CG8851	FBtr0333251	1.12e-06	1.93621	2.53e-11	3.02345	3.39158e-05	3.38481e-09
7024	18168883	FBtr0076174 // CG7557 // CG7557 gene product from transcript CG7557-RA // 68C9-68C9 //	CG7557	FBtr0076174	0.167649	1.2612	0.000194735	2.00157	0.371947	0.00132602
3143	18146305	FBtr0332576 // CG42688 // CG42688 gene product from transcript CG42688-RB // 37C6-37C7	CG42688	FBtr0332576	0.566911	1.09457	7.09e-05	2.04486	0.76897	0.000591933
8552	18177492	FBtr0076178 // CG12289 // CG12289 gene product from transcript CG12289-RA // 68C9-68C9	CG12289	FBtr0076178	0.0136921	1.46163	5.61e-08	2.80395	0.0647963	1.82403e-06
9168	18180560	FBtr0100067 // CG34012 // CG34012 gene product from transcript CG34012-RA // 68A7-68A7	CG34012	FBtr0100067	0.0807925	1.36441	8.55e-05	2.17586	0.228345	0.000683414
2855	18144773	FBtr0079856 // CG31709 // CG31709 gene product from transcript CG31709-RA // 30B12-30B1	CG31709	FBtr0079856	0.398806	1.13331	5.86e-06	2.22029	0.632095	7.99723e-05
6993	18168754	FBtr0076295 // CG8072 // CG8072 gene product from transcript CG8072-RA // 67D9-67D9 //	CG8072	FBtr0076295	2.29e-07	2.21649	1.02e-08	2.54144	8.87824e-06	4.38117e-07
10354	18187208	FBtr0083885 // CG10881 // CG10881 gene product from transcript CG10881-RA // 92E8-92E8	CG10881	FBtr0083885	0.0397986	1.29857	8.1e-08	2.33541	0.140604	2.49449e-06
1251	18135892	FBtr0085935 // ttm3 // tiny tim 3 // 40E2-40E2 // 35437 /// NM_136286 // ttm3 // tiny t	ttm3	FBtr0085935	0.211262	1.26389	0.000225442	2.15027	0.431675	0.00147896
13180	18203548	NR_048529 // CR43436 // ncRNA // 100D2-100D2 // 12798061	CR43436	NR_048529	0.465412	1.09612	3.91e-06	2.00293	0.691215	5.74946e-05
890	18133972	FBtr0300056 // TTLL3B // Tubulin tyrosine ligase-like 3B // 27A2-27A2 // 33946 /// NM_1	TTLL3B	FBtr0300056	0.0874511	1.28561	5.39e-07	2.44841	0.241886	1.19858e-05
4071	18151711	FBtr0086472 // CG11018 // CG11018 gene product from transcript CG11018-RA // 56E1-56E1	CG11018	FBtr0086472	0.00508517	1.39185	3.98e-10	2.67514	0.0305692	3.02906e-08
2995	18145433	FBtr0302372 // CG34049 // CG34049 gene product from transcript CG34049-RB // 22D6-22D6	CG34049	FBtr0302372	0.0528415	1.29677	9.2e-08	2.44352	0.1702	2.75023e-06
4119	18151943	FBtr0071570 // CG9406 // CG9406 gene product from transcript CG9406-RA // 57C3-57C3 //	CG9406	FBtr0071570	0.701336	1.05576	6.7e-06	2.13381	0.855099	8.83339e-05
15545	18216998	FBtr0070659 // CG15578 // CG15578 gene product from transcript CG15578-RA // 4B4-4B4 //	CG15578	FBtr0070659	0.119996	1.41569	0.000224181	2.47854	0.299614	0.00147247
2622	18143501	FBtr0080522 // CG10859 // CG10859 gene product from transcript CG10859-RA // 34B10-34B1	CG10859	FBtr0080522	0.663669	1.06761	4.68e-05	2.02282	0.833968	0.000423901
5602	18160743	FBtr0086996 // CG18469 // CG18469 gene product from transcript CG18469-RA // 54B1-54B1	CG18469	FBtr0086996	0.000439048	1.74965	5.19e-08	2.75596	0.00449288	1.7148e-06
6844	18167860	FBtr0289982 // CG17150 // CG17150 gene product from transcript CG17150-RD // 64C1-64C2	CG17150	FBtr0289982	0.0012556	1.40785	1.73e-09	2.24693	0.0102933	1.01572e-07
10847	18190057	FBtr0304668 // CG31161 // CG31161 gene product from transcript CG31161-RB // 94B6-94B6	CG31161	FBtr0304668	0.0331785	1.31755	1.18e-06	2.10416	0.123433	2.21379e-05
11200	18192135	FBtr0304646 // CG43062 // CG43062 gene product from transcript CG43062-RA // 86E17-86E1	CG43062	FBtr0304646	4.79e-07	1.88585	2.65e-12	3.03296	1.66345e-05	4.80592e-10
5297	18159022	FBtr0088724 // CG8584 // CG8584 gene product from transcript CG8584-RA // 44E2-44E2 //	CG8584	FBtr0088724	0.656515	1.08068	7.99e-05	2.19127	0.829466	0.00064882
12303	18198688	FBtr0084152 // CG17819 // CG17819 gene product from transcript CG17819-RA // 93F14-93F1	CG17819	FBtr0084152	0.418336	1.14471	4.97e-05	2.1718	0.649242	0.000445961
2630	18143527	FBtr0301695 // CG4650 // CG4650 gene product from transcript CG4650-RB // 35B5-35B5 //	CG4650	FBtr0301695	5.41e-21	11.7469	3.6e-20	10.063	1.26146e-17	7.3449e-17
1647	18137808	FBtr0300310 // Sfp33A3 // Seminal fluid protein 33A3 // 33A3-33A3 // 8674115 /// NM_001	Sfp33A3	FBtr0300310	0.0013727	1.67169	3.04e-07	2.583	0.0110425	7.55234e-06
5481	18160117	FBtr0087652 // CG12464 // CG12464 gene product from transcript CG12464-RA // 50B5-50B6	CG12464	FBtr0087652	0.0552177	1.44486	0.000180134	2.19368	0.175309	0.00124214
8625	18177878	FBtr0075891 // CG11251 // CG11251 gene product from transcript CG11251-RA // 70A1-70A1	CG11251	FBtr0075891	0.878806	-1.02033	9.17e-06	2.0003	0.944923	0.000113993
5283	18158961	FBtr0088801 // CG12126 // CG12126 gene product from transcript CG12126-RA // 44C3-44C3	CG12126	FBtr0088801	0.130781	1.23405	1.26e-05	2.01915	0.317319	0.000146898
4550	18154185	FBtr0100076 // CG34021 // CG34021 gene product from transcript CG34021-RA // 48F10-48F1	CG34021	FBtr0100076	0.264854	1.17457	1.23e-05	2.08791	0.49507	0.000144121
12233	18198295	FBtr0083770 // CG3517 // CG3517 gene product from transcript CG3517-RA // 92A4-92A4 //	CG3517	FBtr0083770	0.621035	1.07008	5.26e-06	2.10588	0.805368	7.33792e-05
509	18131836	FBtr0089699 // Tim17b2 // Translocase inner membrane 17 // 35D2-35D2 // 44381 /// NM_08	Tim17b2	FBtr0089699	2.99e-06	2.58457	5.3e-11	5.12591	7.7342e-05	5.96597e-09
3151	18146321	FBtr0302991 // CG42710 // CG42710 gene product from transcript CG42710-RA // 29F1-29F1	CG42710	FBtr0302991	0.975713	-1.00395	4.9e-06	2.03074	0.990089	6.90655e-05
10732	18189362	FBtr0113315 // CG1638 // CG1638 gene product from transcript CG1638-RB // 100C7-100C7 /	CG1638	FBtr0113315	0.0546108	1.26177	1.56e-08	2.41379	0.173934	6.2561e-07
10809	18189808	NM_169147 // Pif2 // PFTAIRE-interacting factor 2 // 83F1-83F1 // 170876 /// FBtr008167	Pif2	NM_169147	0.486332	1.12336	7.88e-05	2.11778	0.708679	0.000641483
15592	18217258	FBtr0074025 // CG32588 // CG32588 gene product from transcript CG32588-RA // 13B3-13B3	CG32588	FBtr0074025	0.558176	1.08593	1.91e-05	2.01758	0.763454	0.000204829
1187	18135558	FBtr0081198 // CG17349 // CG17349 gene product from transcript CG17349-RA // 37D3-37D3	CG17349	FBtr0081198	0.0225026	1.43082	5.25e-07	2.5591	0.0932438	1.17064e-05
1068	18134974	FBtr0080253 // CG4983 // CG4983 gene product from transcript CG4983-RA // 32F4-32F4 //	CG4983	FBtr0080253	0.23683	1.24943	9.6e-05	2.28465	0.463272	0.000753323
11921	18196508	FBtr0082317 // CG14689 // CG14689 gene product from transcript CG14689-RA // 86C4-86C4	CG14689	FBtr0082317	0.465289	1.09907	5.17e-06	2.01846	0.691167	7.23711e-05
11418	18193572	NM_079530 // Mst84Dc // Male-specific RNA 84Dc // 84D5-84D5 // 40887 /// NM_001104231 /	Mst84Dc	NM_079530	0.946542	-1.01719	0.00328867	2.23208	0.977504	0.0126182
12513	18199806	FBtr0085177 // CG14262 // CG14262 gene product from transcript CG14262-RA // 97E11-97F1	CG14262	FBtr0085177	0.862706	1.02487	2.25e-05	2.01795	0.937364	0.00023332
10911	18190402	FBtr0083812 // CG31459 // CG31459 gene product from transcript CG31459-RA // 92B3-92B3	CG31459	FBtr0083812	0.545363	1.11387	4.95e-05	2.29431	0.754204	0.000444411
4326	18153037	FBtr0087406 // CG12853 // CG12853 gene product from transcript CG12853-RA // 51D3-51D3	CG12853	FBtr0087406	0.00202895	1.69931	6.41e-06	2.34702	0.0148972	8.56872e-05
9149	18180480	FBtr0333216 // CG33489 // CG33489 gene product from transcript CG33489-RA // 68C13-68C1	CG33489	FBtr0333216	0.00396855	1.49471	7.35e-06	2.00167	0.0253026	9.52873e-05
9867	18184737	NM_141357 // Vha14-2 // Vacuolar H[+] ATPase subunit 14-2 // 83D4-83D4 // 40748 /// FBt	Vha14-2	NM_141357	6e-07	2.28767	8.7e-12	4.04281	2.01506e-05	1.33964e-09
13035	18202699	NM_142696 // Snmp1 // Sensory neuron membrane protein 1 // 93C2-93C2 // 42514 /// NM_00	Snmp1	NM_142696	3.55e-14	2.46029	5.15e-15	2.63241	1.31689e-11	2.27185e-12
15200	18215217	FBtr0073638 // CG1950 // CG1950 gene product from transcript CG1950-RA // 11A2-11A2 //	CG1950	FBtr0073638	0.383617	1.12225	1.69e-06	2.15623	0.61786	2.96604e-05
6994	18168757	FBtr0301227 // CG8065 // CG8065 gene product from transcript CG8065-RB // 67D10-67D11 /	CG8065	FBtr0301227	0.27448	1.23542	0.00049452	2.0946	0.505993	0.00276234
12129	18197727	FBtr0300677 // CG10317 // CG10317 gene product from transcript CG10317-RD // 89B13-89B1	CG10317	FBtr0300677	5.15e-06	2.22517	3.4e-09	3.26851	0.000121647	1.79015e-07
12840	18201580	FBtr0082554 // CG31358 // CG31358 gene product from transcript CG31358-RA // 87A5-87A5	CG31358	FBtr0082554	0.000383353	1.67402	6.34e-08	2.49132	0.00405514	2.02112e-06
13040	18202724	FBtr0082554 // CG31358 // CG31358 gene product from transcript CG31358-RA // 87A5-87A5	CG31358	FBtr0082554	0.000383353	1.67402	6.34e-08	2.49132	0.00405514	2.02112e-06
13041	18202730	FBtr0082554 // CG31358 // CG31358 gene product from transcript CG31358-RA // 87A5-87A5	CG31358	FBtr0082554	0.000383353	1.67402	6.34e-08	2.49132	0.00405514	2.02112e-06
6999	18168777	FBtr0076257 // CG14154 // CG14154 gene product from transcript CG14154-RA // 67E5-67E5	CG14154	FBtr0076257	0.127201	1.23833	1.61e-06	2.23731	0.311834	2.85946e-05
908	18134094	FBtr0079442 // CG15818 // CG15818 gene product from transcript CG15818-RA // 27F3-27F3	CG15818	FBtr0079442	1.59e-14	10.6328	3.62e-07	3.0833	7.01405e-12	8.76642e-06
13108	18203188	NR_037763 // CR42836 // ncRNA // 92D2-92D2 // 10178865 /// NR_037762 // CR42836 // ncRN	CR42836	NR_037763	0.611237	-1.08049	1.66e-05	2.15426	0.799152	0.000181965
10532	18188278	FBtr0084810 // to // takeout // 96C7-96C7 // 43036 /// NM_079773 // to // takeout // 96	to	FBtr0084810	6.36e-16	5.04968	9.67e-15	4.32606	4.15232e-13	3.67055e-12
6261	18164407	FBtr0302888 // CG42691 // CG42691 gene product from transcript CG42691-RA // 56E5-56E5	CG42691	FBtr0302888	0.00276691	1.62771	1.33e-08	3.13615	0.0191281	5.49576e-07
3531	18148584	FBtr0087043 // CG6421 // CG6421 gene product from transcript CG6421-RA // 53D15-53D15 /	CG6421	FBtr0087043	1.79e-11	2.37317	1.53e-12	2.59841	2.75626e-09	2.93796e-10
2502	18142869	FBtr0079891 // CG5846 // CG5846 gene product from transcript CG5846-RA // 30F2-30F2 //	CG5846	FBtr0079891	3.78e-18	3.07434	1.96e-18	3.15567	3.85607e-15	2.28508e-15
10559	18188414	FBtr0084902 // CG5024 // CG5024 gene product from transcript CG5024-RA // 96F3-96F3 //	CG5024	FBtr0084902	0.775176	1.04672	2.22e-05	2.20487	0.894607	0.000230795
10111	18185920	FBtr0110781 // CG11598 // CG11598 gene product from transcript CG11598-RB // 87C3-87C3	CG11598	FBtr0110781	6.38e-18	28.7657	3.84e-15	14.3916	5.78524e-15	1.74101e-12
3710	18149657	NM_136628 // Cyp4p2 // CG1944 gene product from transcript CG1944-RA // 45B7-45B7 // 35	Cyp4p2	NM_136628	2.89e-18	14.0373	1.44e-19	18.7757	3.51467e-15	2.1367e-16
7679	18172085	FBtr0112464 // CG34269 // CG34269 gene product from transcript CG34269-RA // 61C3-61C3	CG34269	FBtr0112464	0.000119958	1.76988	1.59e-10	3.36354	0.00160401	1.47454e-08
1404	18136842	FBtr0080138 // CG31870 // CG31870 gene product from transcript CG31870-RC // 32B1-32B1	CG31870	FBtr0080138	0.0748092	1.44171	6.81e-05	2.48922	0.216638	0.000573498
782	18133418	FBtr0301033 // CG3347 // CG3347 gene product from transcript CG3347-RB // 23E1-23E1 //	CG3347	FBtr0301033	0.000396758	1.50982	4.58e-09	2.30045	0.00415045	2.25845e-07
6422	18165208	NM_001015389 // Scp1 // Sarcoplasmic calcium-binding protein 1 // 80A-80B // 3355102 //	Scp1	NM_001015389	0.990618	-1.00208	2e-07	3.20756	0.995929	5.29935e-06
6961	18168560	FBtr0076430 // CG4477 // CG4477 gene product from transcript CG4477-RB // 67A4-67A4 //	CG4477	FBtr0076430	0.422296	1.1181	5.42e-07	2.37069	0.65309	1.20256e-05
10719	18189265	FBtr0085731 // CG15548 // CG15548 gene product from transcript CG15548-RA // 100B1-100B	CG15548	FBtr0085731	0.177548	1.2618	0.000218425	2.02423	0.386908	0.00144454
886	18133949	FBtr0079289 // CG11043 // CG11043 gene product from transcript CG11043-RA // 26E3-26E3	CG11043	FBtr0079289	0.00168325	1.45308	1.89e-09	2.48157	0.0128857	1.09392e-07
4021	18151405	NM_137479 // GstE1 // Glutathione S transferase E1 // 55C6-55C6 // 37106 /// FBtr008666	GstE1	NM_137479	3.23e-18	4.95975	7.94e-18	4.71788	3.51467e-15	7.62333e-15
12474	18199615	FBtr0084984 // CG14546 // CG14546 gene product from transcript CG14546-RA // 96F8-96F8	CG14546	FBtr0084984	0.532408	1.11432	0.000130159	2.11444	0.745572	0.000962163
14986	18214185	FBtr0070532 // CG14269 // CG14269 gene product from transcript CG14269-RB // 3D3-3D3 //	CG14269	FBtr0070532	0.627154	1.09381	0.000374079	2.07406	0.809302	0.00221784
12382	18199126	FBtr0084525 // CG13597 // CG13597 gene product from transcript CG13597-RA // 95C8-95C9	CG13597	FBtr0084525	0.0759875	1.3	4.51e-06	2.20853	0.219013	6.46288e-05
6957	18168543	FBtr0076523 // CG5144 // CG5144 gene product from transcript CG5144-RA // 66F3-66F3 //	CG5144	FBtr0076523	0.0718229	1.25285	8.57e-07	2.09777	0.210072	1.71631e-05
4543	18154159	FBtr0091692 // CG33704 // CG33704 gene product from transcript CG33704-RA // 57B5-57B5	CG33704	FBtr0091692	6.7e-05	1.80238	2.77e-09	2.8639	0.000998698	1.48723e-07
8788	18178660	FBtr0075132 // CG5103 // CG5103 gene product from transcript CG5103-RA // 75C3-75C3 //	CG5103	FBtr0075132	0.197677	1.20774	1.29e-05	2.10115	0.414342	0.000149754
1411	18136867	FBtr0300460 // CG31909 // CG31909 gene product from transcript CG31909-RC // 27E7-27E7	CG31909	FBtr0300460	0.0260042	1.45338	3.11e-08	3.22165	0.103421	1.11319e-06
1281	18136116	FBtr0305492 // ACXA // CG17176 gene product from transcript CG17176-RE // 34A2-34A2 //	ACXA	FBtr0305492	0.151145	1.2376	7.4e-06	2.17704	0.348543	9.57074e-05
9866	18184735	FBtr0078645 // CG14676 // CG14676 gene product from transcript CG14676-RA // 83C5-83C5	CG14676	FBtr0078645	0.395296	1.13213	1.13e-05	2.12089	0.629097	0.000134137
3214	18146593	FBtr0306920 // CG43339 // CG43339 gene product from transcript CG43339-RB // 36F10-36F1	CG43339	FBtr0306920	0.000122587	1.67069	4.74e-11	3.15893	0.00163011	5.44833e-09
6493	18165639	FBtr0334114 // msopa // male-specific opa containing gene // 79B3-79B3 // 45962 /// FBt	msopa	FBtr0334114	0.00247503	2.02718	1e-05	3.09457	0.0174578	0.000122538
11351	18193100	FBtr0085598 // janB // janus B // 99D3-99D3 // 43568 /// NM_057236 // janB // janus B /	janB	FBtr0085598	0.959104	1.00965	0.000657068	2.02171	0.982675	0.00346852
588	18132362	FBtr0081258 // msb1l // CG10364 gene product from transcript CG10364-RA // 37F2-37F2 //	msb1l	FBtr0081258	0.458343	1.11167	1.62e-05	2.05218	0.685457	0.000178419
4069	18151704	FBtr0086470 // CG15124 // CG15124 gene product from transcript CG15124-RA // 56E1-56E1	CG15124	FBtr0086470	0.0711315	1.39974	1.33e-07	3.39227	0.208493	3.73636e-06
10057	18185678	NM_141805 // scpr-A // SCP-containing protein A // 86D8-86D8 // 41358 /// FBtr0082357 /	scpr-A	NM_141805	0.879607	-1.02636	0.00019719	2.05249	0.945066	0.00133933
15591	18217252	FBtr0074184 // CG32581 // CG32581 gene product from transcript CG32581-RB // 13F1-13F1	CG32581	FBtr0074184	1.32e-16	48.2817	5.22e-16	39.9883	9.36741e-14	3.55004e-13
3046	18145686	NM_134910 // CG44002 // CG44002 gene product from transcript CG44002-RA // 23D4-23D4 //	CG44002	NM_134910	7.83e-08	1.6772	3.25e-11	2.09682	3.62043e-06	4.0805e-09
6321	18164680	FBtr0304897 // CG43110 // CG43110 gene product from transcript CG43110-RA // 54B17-54B1	CG43110	FBtr0304897	1.53e-14	3.43443	5.05e-20	6.93668	6.93685e-12	9.15846e-17
1761	18138438	FBtr0306288 // CG43235 // CG43235 gene product from transcript CG43235-RA // 28C1-28C1	CG43235	FBtr0306288	8.18e-15	5.39184	1.26e-06	2.07358	4.04588e-12	2.33967e-05
1765	18138454	NR_047984 // CR43304 // ncRNA // 36C11-36C11 // 12797994	CR43304	NR_047984	0.482442	1.10518	1.39e-05	2.06421	0.705846	0.000158765
612	18132515	FBtr0080551 // CG7968 // CG7968 gene product from transcript CG7968-RA // 34D8-34D8 //	CG7968	FBtr0080551	1.35e-11	3.46965	7.39e-07	2.09933	2.16026e-09	1.52683e-05
764	18133338	FBtr0077722 // CG2964 // CG2964 gene product from transcript CG2964-RA // 23B2-23B2 //	CG2964	FBtr0077722	2.66e-05	2.06202	8.59e-09	3.14263	0.000475537	3.87142e-07
7054	18169017	FBtr0076048 // CG6931 // CG6931 gene product from transcript CG6931-RA // 68F1-68F1 //	CG6931	FBtr0076048	0.189688	1.1859	4.13e-06	2.03174	0.404093	6.01337e-05
3104	18146095	FBtr0310075 // nimC1 // nimrod C1 // 34E5-34E5 // 34816 /// FBtr0080615 // nimC1 // nim	nimC1	FBtr0310075	2.74e-19	6.24776	1.35e-19	6.5384	4.06566e-16	2.1367e-16
8752	18178484	FBtr0075248 // CG13725 // CG13725 gene product from transcript CG13725-RA // 74A4-74A4	CG13725	FBtr0075248	0.920211	1.01623	0.000127405	2.00918	0.964004	0.000946089
15891	18218905	NR_047792 // CR43498 // ncRNA // 9A1-9A1 // 12797960	CR43498	NR_047792	0.0204192	1.32535	3.69e-10	2.82303	0.0867019	2.88173e-08
12927	18202102	FBtr0083346 // CG31275 // CG31275 gene product from transcript CG31275-RA // 89E1-89E1	CG31275	FBtr0083346	0.00361422	1.50315	2.7e-08	2.59514	0.0235682	9.92554e-07
5234	18158553	FBtr0300063 // CG12831 // CG12831 gene product from transcript CG12831-RB // 42E7-42E7	CG12831	FBtr0300063	5.9e-06	2.50885	4.55e-08	3.35738	0.000137375	1.52495e-06
13878	18207670	FBtr0070816 // Prosbeta2R1 // Proteasome beta2R1 subunit // 5C2-5C2 // 31511 /// NM_132	Prosbeta2R1	FBtr0070816	0.0870971	1.50304	0.000265286	2.58309	0.241276	0.00168614
912	18134127	FBtr0079451 // CG6441 // CG6441 gene product from transcript CG6441-RA // 28A1-28A1 //	CG6441	FBtr0079451	1.89e-07	1.97914	2.2e-10	2.56963	7.69291e-06	1.88992e-08
6115	18163460	FBtr0307216 // CG33914 // CG33914 gene product from transcript CG33914-RC // 42E5-42E5	CG33914	FBtr0307216	2.1e-14	5.21787	6.7e-10	2.95733	8.69147e-12	4.63379e-08
4274	18152764	FBtr0072300 // CG13581 // CG13581 gene product from transcript CG13581-RA // 60D3-60D3	CG13581	FBtr0072300	0.0806016	1.35351	6.24e-05	2.17145	0.228082	0.000534642
689	18132916	FBtr0078066 // CG2789 // CG2789 gene product from transcript CG2789-RA // 21E2-21E2 //	CG2789	FBtr0078066	6.69e-12	2.75703	8.06e-11	2.4951	1.16164e-09	8.54255e-09
13156	18203403	FBtr0306166 // CG43222 // CG43222 gene product from transcript CG43222-RA // 96A13-96A1	CG43222	FBtr0306166	1.14e-08	1.74837	1.28e-14	2.68995	7.04814e-07	4.6427e-12
414	18131170	NM_057431 // Uro // Urate oxidase // 28C3-28C3 // 34060 /// FBtr0079486 // Uro // Urate	Uro	NM_057431	0.721763	1.08301	0.00024524	2.50768	0.864871	0.00158659
15653	18217579	NM_167693 // Sdic3 // Sperm-specific dynein intermediate chain 3 // 19C1-19C1 // 318231	Sdic3	NM_167693	0.808687	1.05308	0.00257356	2.00273	0.912631	0.0103796
3617	18149114	FBtr0085990 // CG8335 // CG8335 gene product from transcript CG8335-RA // 42A13-42A13 /	CG8335	FBtr0085990	0.439836	1.12627	1.67e-05	2.16649	0.669808	0.000182815
1709	18138238	FBtr0303932 // CG42847 // CG42847 gene product from transcript CG42847-RA // 30B3-30B3	CG42847	FBtr0303932	6.93e-05	1.87004	4.41e-10	3.38127	0.00102642	3.31705e-08
2771	18144300	FBtr0331295 // RpL21 // Ribosomal protein L21 // 40F6-40F6 // 35453 /// FBtr0085961 //	RpL21	FBtr0331295	3.11e-18	4.19754	3.52e-15	3.04613	3.51467e-15	1.66018e-12
8308	18176167	FBtr0073092 // CG12078 // CG12078 gene product from transcript CG12078-RB // 63C1-63C1	CG12078	FBtr0073092	0.0938073	1.36319	4.33e-05	2.3449	0.254001	0.000397493
8680	18178107	FBtr0075618 // Best3 // Bestrophin 3 // 71C2-71C2 // 39661 /// NM_168618 // Best3 // Be	Best3	FBtr0075618	0.55708	1.0926	3.9e-05	2.04379	0.763063	0.000365628
7533	18171452	FBtr0073061 // Drsl4 // Drosomycin-like 4 // 63D1-63D1 // 317954 /// NM_168021 // Drsl4	Drsl4	FBtr0073061	8.7e-20	20.8621	2.66e-17	12.0219	1.57779e-16	2.41203e-14
15939	18219244	NM_001015499 // kl-5 // male fertility factor kl5 // h2-h3 // 3355175 /// FBtr0113891 /	kl-5	NM_001015499	0.78891	-1.0372	4.79e-06	2.11058	0.902296	6.78666e-05
7322	18170352	FBtr0078266 // CG10589 // CG10589 gene product from transcript CG10589-RA // 78A1-78A1	CG10589	FBtr0078266	0.0368084	1.43389	1.44e-05	2.33695	0.133006	0.000162994
4935	18156355	NM_057341 // PpY-55A // Protein phosphatase Y at 55A // 55A2-55A2 // 48532 /// FBtr0086	PpY-55A	NM_057341	0.108222	1.33872	0.000265535	2.06607	0.279538	0.00168706
2778	18144335	FBtr0306060 // CG15219 // CG15219 gene product from transcript CG15219-RC // 40E3-40E3	CG15219	FBtr0306060	0.835342	1.03175	7.61e-06	2.22455	0.924244	9.79577e-05
2621	18143499	FBtr0080523 // CG16957 // CG16957 gene product from transcript CG16957-RA // 34B10-34B1	CG16957	FBtr0080523	0.435273	1.13314	1.52e-05	2.24735	0.665654	0.000170044
2553	18143158	FBtr0114455 // Ast-CC // Allatostatin double C // 32D2-32D2 // 34538 /// NM_135639 // A	Ast-CC	FBtr0114455	1.11e-20	7.66744	2.45e-19	6.24212	2.26468e-17	3.07607e-16
5656	18161023	FBtr0086642 // CG17821 // CG17821 gene product from transcript CG17821-RA // 55E11-55E1	CG17821	FBtr0086642	0.639124	1.07641	4.33e-08	3.06084	0.818115	1.46324e-06
962	18134399	FBtr0079738 // CG9483 // CG9483 gene product from transcript CG9483-RA // 29F3-29F3 //	CG9483	FBtr0079738	0.00636201	1.59477	2.11e-07	2.87529	0.0364481	5.51914e-06
3197	18146527	NM_164806 // mtsh // mitoshell // 29A4-29A4 // 34141 /// FBtr0301169 // mtsh // mitoshe	mtsh	NM_164806	0.00194066	1.45344	1.44e-07	2.10968	0.0143653	3.99044e-06
13097	18203120	FBtr0307889 // CG42778 // CG42778 gene product from transcript CG42778-RB // 87F2-87F2	CG42778	FBtr0307889	0.0782711	1.30051	2.64e-08	2.89857	0.222957	9.74889e-07
7577	18171670	FBtr0329896 // mthl8 // methuselah-like 8 // 61A5-61A5 // 38013 /// NM_001274253 // mth	mthl8	FBtr0329896	2.46e-12	10.711	1.26e-15	23.7226	5.08255e-10	7.61693e-13
11417	18193569	NM_079531 // Mst84Db // Male-specific RNA 84Db // 84D5-84D5 // 40888 /// FBtr0081586 //	Mst84Db	NM_079531	0.934515	-1.01456	0.000113696	2.16135	0.971413	0.000863784
3946	18151018	FBtr0087151 // CG6262 // CG6262 gene product from transcript CG6262-RB // 53C2-53C2 //	CG6262	FBtr0087151	0.0141636	1.51038	5.86e-06	2.37491	0.0663613	7.99723e-05
4925	18156300	NM_057280 // Mal-A3 // Maltase A3 // 44D1-44D1 // 35826 /// FBtr0088758 // Mal-A3 // Ma	Mal-A3	NM_057280	8.85e-13	10.1554	4.88e-11	7.16139	2.0345e-10	5.53134e-09
9147	18180460	FBtr0113459 // CG33286 // CG33286 gene product from transcript CG33286-RB // 78A1-78A2	CG33286	FBtr0113459	0.116398	1.33811	2.7e-05	2.42816	0.293594	0.00027103
14432	18210634	FBtr0300461 // CG32718 // CG32718 gene product from transcript CG32718-RC // 7B8-7B8 //	CG32718	FBtr0300461	0.572974	-1.08532	5.96e-06	2.18746	0.772835	8.10659e-05
3722	18149731	FBtr0088468 // CG10459 // CG10459 gene product from transcript CG10459-RA // 46A1-46A1	CG10459	FBtr0088468	0.18861	1.18269	1.1e-06	2.12455	0.402575	2.09013e-05
1288	18136147	FBtr0079760 // CG18662 // CG18662 gene product from transcript CG18662-RA // 29F6-29F6	CG18662	FBtr0079760	0.159646	1.21346	6.62e-07	2.30456	0.360756	1.40692e-05
5732	18161444	FBtr0071627 // CG4286 // CG4286 gene product from transcript CG4286-RA // 57C7-57C7 //	CG4286	FBtr0071627	0.668951	1.08889	0.000255165	2.25794	0.835955	0.00163582
12010	18197071	FBtr0302379 // CG5999 // CG5999 gene product from transcript CG5999-RB // 87C8-87C8 //	CG5999	FBtr0302379	6.94e-14	10.4708	3.34e-11	6.27153	2.31173e-11	4.16149e-09
8283	18176065	FBtr0073010 // CG9970 // CG9970 gene product from transcript CG9970-RA // 63A1-63A1 //	CG9970	FBtr0073010	0.00430177	1.57954	5.77e-07	2.53374	0.0269741	1.26244e-05
7803	18173058	FBtr0303850 // CG42831 // CG42831 gene product from transcript CG42831-RA // 67F1-67F1	CG42831	FBtr0303850	0.000122643	1.92432	7.83e-07	2.50535	0.00163011	1.60152e-05
721	18133084	FBtr0305552 // CG5440 // CG5440 gene product from transcript CG5440-RB // 22A1-22A1 //	CG5440	FBtr0305552	0.234178	1.18234	3.44e-06	2.17811	0.459848	5.2085e-05
8998	18179739	NM_140103 // Ilp3 // Insulin-like peptide 3 // 67C8-67C8 // 39151 /// FBtr0076373 // Il	Ilp3	NM_140103	0.0588945	1.28371	4.86e-06	2.01924	0.183555	6.87391e-05
5867	18162124	FBtr0072357 // CG15873 // CG15873 gene product from transcript CG15873-RA // 60C8-60C8	CG15873	FBtr0072357	0.687477	1.06765	7e-05	2.09451	0.846421	0.000585018
3979	18151194	FBtr0086990 // CG10950 // CG10950 gene product from transcript CG10950-RA // 54A2-54A2	CG10950	FBtr0086990	0.0227294	1.49796	3.17e-05	2.27042	0.0938501	0.000309454
2222	18141218	FBtr0077894 // c-cup // calcutta cup // 22B3-22B3 // 33360 /// NM_134779 // c-cup // ca	c-cup	FBtr0077894	2.39e-05	1.72195	1.11e-11	3.14019	0.000437327	1.64704e-09
9150	18180485	FBtr0089526 // CG33490 // CG33490 gene product from transcript CG33490-RA // 68C13-68C1	CG33490	FBtr0089526	0.20712	1.36315	0.00089763	2.4186	0.425984	0.00446408
15204	18215227	FBtr0073634 // CG1924 // CG1924 gene product from transcript CG1924-RA // 11A6-11A6 //	CG1924	FBtr0073634	0.119146	1.34828	8.18e-06	2.70477	0.298313	0.000103821
12837	18201560	FBtr0082664 // CG31347 // CG31347 gene product from transcript CG31347-RA // 87C5-87C5	CG31347	FBtr0082664	0.0904911	1.285	2.21e-06	2.29662	0.248105	3.66582e-05
3227	18146640	NR_048017 // CR43414 // ncRNA // 38C4-38C4 // 12798021 /// NR_048016 // CR43414 // ncRN	CR43414	NR_048017	2.79e-07	3.38504	2.66e-09	4.66094	1.05413e-05	1.44241e-07
3204	18146552	NR_047983 // CR43239 // ncRNA // 36C6-36C6 // 12798251	CR43239	NR_047983	0.886668	1.02999	0.000962765	2.11684	0.948064	0.00470627
10509	18188151	FBtr0084713 // CG10845 // CG10845 gene product from transcript CG10845-RA // 96B4-96B5	CG10845	FBtr0084713	0.571855	1.07514	5.3e-06	2.00539	0.772494	7.38741e-05
10626	18188771	FBtr0085279 // CG17856 // CG17856 gene product from transcript CG17856-RA // 98C3-98C3	CG17856	FBtr0085279	6.97e-06	2.61658	8.57e-07	2.98256	0.000158889	1.71631e-05
15156	18214964	FBtr0071504 // CG12637 // CG12637 gene product from transcript CG12637-RA // 9E1-9E1 //	CG12637	FBtr0071504	0.0323252	1.33784	7.12e-08	2.48666	0.121207	2.24783e-06
1630	18137719	FBtr0080673 // CG33308 // CG33308 gene product from transcript CG33308-RA // 35B6-35B6	CG33308	FBtr0080673	0.1913	1.2552	1.02e-05	2.44673	0.406395	0.000124242
633	18132629	FBtr0080672 // CG4701 // CG4701 gene product from transcript CG4701-RA // 35B5-35B5 //	CG4701	FBtr0080672	0.0152283	1.57241	6.22e-06	2.60382	0.0700751	8.35579e-05
9120	18180352	FBtr0078567 // CG32461 // CG32461 gene product from transcript CG32461-RA // 80C1-80C1	CG32461	FBtr0078567	0.485412	1.12026	4.64e-06	2.43539	0.708344	6.6028e-05
9207	18180709	FBtr0112447 // CG34253 // CG34253 gene product from transcript CG34253-RA // 75B7-75B7	CG34253	FBtr0112447	6.64e-13	2.3686	1.06e-12	2.33131	1.54826e-10	2.19004e-10
6347	18164814	FBtr0307338 // CG43371 // CG43371 gene product from transcript CG43371-RA // 53E11-53E1	CG43371	FBtr0307338	0.722532	1.05398	1.33e-05	2.13416	0.8653	0.000153199
12501	18199740	FBtr0085150 // CG6277 // CG6277 gene product from transcript CG6277-RA // 97D14-97D14 /	CG6277	FBtr0085150	3.16e-10	10.2928	1.48e-08	7.04157	3.05192e-08	5.97935e-07
7045	18168972	FBtr0332127 // CG14128 // CG14128 gene product from transcript CG14128-RF // 68E3-68E3	CG14128	FBtr0332127	0.159198	1.28186	0.000308146	2.01192	0.360043	0.00189938
4824	18155682	FBtr0306290 // CG43237 // CG43237 gene product from transcript CG43237-RA // 54A3-54A3	CG43237	FBtr0306290	0.000112248	1.88685	1.92e-08	2.93366	0.00151916	7.46149e-07
2422	18142330	FBtr0302518 // CG13793 // CG13793 gene product from transcript CG13793-RB // 28C1-28C1	CG13793	FBtr0302518	5.47e-17	6.64483	2.33e-13	4.01134	4.25149e-14	6.03655e-11
6977	18168648	FBtr0076380 // CG3306 // CG3306 gene product from transcript CG3306-RA // 67C2-67C2 //	CG3306	FBtr0076380	0.0123256	1.36945	1.79e-07	2.20428	0.0599995	4.81324e-06
15682	18217752	FBtr0302414 // CG33665 // CG33665 gene product from transcript CG33665-RB // 6A2-6A2 //	CG33665	FBtr0302414	0.9359	1.01412	0.000147223	2.11287	0.972359	0.00106373
10661	18188972	FBtr0085440 // CG2014 // CG2014 gene product from transcript CG2014-RA // 99B2-99B2 //	CG2014	FBtr0085440	0.00375374	1.74789	6.74e-07	3.02408	0.0242744	1.425e-05
2546	18143123	FBtr0305259 // CG14071 // CG14071 gene product from transcript CG14071-RB // 32B3-32B3	CG14071	FBtr0305259	0.0220495	1.38745	2.44e-06	2.18653	0.0917502	3.99455e-05
10408	18187546	FBtr0084215 // CG7069 // CG7069 gene product from transcript CG7069-RA // 94A6-94A6 //	CG7069	FBtr0084215	0.213075	1.16222	2.86e-07	2.16055	0.433642	7.15965e-06
8723	18178314	FBtr0075424 // Cpr72Ec // Cuticular protein 72Ec // 72E2-72E2 // 39816 /// NM_140627 //	Cpr72Ec	FBtr0075424	0.00121351	1.91496	4.63e-07	3.18065	0.010039	1.0599e-05
8370	18176479	FBtr0077152 // blanks // CG10630 gene product from transcript CG10630-RA // 64D2-64D2 /	blanks	FBtr0077152	0.026734	1.56579	0.000564072	2.09768	0.105603	0.00305873
15507	18216814	FBtr0307159 // Tsp3A // Tetraspanin 3A // 3A7-3A7 // 31244 /// NM_001258575 // Tsp3A //	Tsp3A	FBtr0307159	5.21e-13	2.86652	1.65e-12	2.73545	1.28845e-10	3.09555e-10
2145	18140828	FBtr0300837 // CG15283 // CG15283 gene product from transcript CG15283-RB // 35B1-35B1	CG15283	FBtr0300837	0.000342185	1.83137	5e-08	2.92749	0.00372343	1.66212e-06
2342	18141829	FBtr0079121 // CG14013 // CG14013 gene product from transcript CG14013-RA // 25E6-25E6	CG14013	FBtr0079121	0.0125413	1.67118	1.13e-05	2.75201	0.0608861	0.000134137
6458	18165416	FBtr0100558 // Hsp22 // Heat shock protein 22 // 67B2-67B2 // 3772576 /// FBtr0100655 /	Hsp22	FBtr0100558	0.00603276	1.56354	1.79e-05	2.15466	0.0349568	0.00019323
16119	18219645	---	NA	---	1.23e-05	2.90456	7.14e-08	4.21976	0.000253486	2.2486e-06
3105	18146099	FBtr0300295 // Sfp23F // Seminal fluid protein 23F // 23F1-23F1 // 8674054 /// NM_00116	Sfp23F	FBtr0300295	9.87e-16	9.70393	5.01e-13	6.02808	6.19608e-13	1.18512e-10
3160	18146374	FBtr0303282 // CG42752 // CG42752 gene product from transcript CG42752-RA // 37A2-37A2	CG42752	FBtr0303282	0.0905333	1.35312	3.17e-06	2.66709	0.248105	4.8812e-05
2861	18144811	FBtr0080480 // CG31730 // CG31730 gene product from transcript CG31730-RA // 34B3-34B3	CG31730	FBtr0080480	0.71535	1.0617	1.57e-05	2.29588	0.861371	0.000174442
7048	18168989	FBtr0076040 // Rpt4R // CG7257 gene product from transcript CG7257-RA // 68E3-68E3 // 3	Rpt4R	FBtr0076040	0.150387	1.31074	0.000350754	2.08895	0.347384	0.00210556
6798	18167590	FBtr0073062 // Drsl5 // Drosomycin-like 5 // 63D1-63D1 // 38409 /// NM_139546 // Drsl5	Drsl5	FBtr0073062	1.24e-09	3.04412	3.62e-12	4.16905	1.01196e-07	6.21954e-10
7598	18171787	FBtr0076857 // CG33278 // CG33278 gene product from transcript CG33278-RA // 66A1-66A1	CG33278	FBtr0076857	3.77e-06	1.96792	9.29e-11	3.17151	9.38017e-05	9.59692e-09
4221	18152455	FBtr0072071 // CG5398 // CG5398 gene product from transcript CG5398-RA // 59F4-59F4 //	CG5398	FBtr0072071	0.0257359	1.45994	1.03e-05	2.33778	0.102579	0.000124901
15670	18217669	FBtr0074346 // CG33252 // CG33252 gene product from transcript CG33252-RA // 15B5-15B5	CG33252	FBtr0074346	0.0254521	1.43726	3.43e-06	2.39047	0.101796	5.19819e-05
7481	18171188	FBtr0076117 // CG32087 // CG32087 gene product from transcript CG32087-RA // 68D3-68D3	CG32087	FBtr0076117	1.39e-05	2.17088	7.22e-08	2.87125	0.00028044	2.2619e-06
2904	18144990	FBtr0077896 // CG31933 // CG31933 gene product from transcript CG31933-RA // 22B3-22B3	CG31933	FBtr0077896	0.189704	1.29017	0.000648714	2.05549	0.404093	0.00342997
10908	18190391	FBtr0334026 // CG31446 // CG31446 gene product from transcript CG31446-RB // 89A2-89A2	CG31446	FBtr0334026	1.22e-10	5.6602	3.92e-07	3.23681	1.39251e-08	9.29644e-06
13172	18203504	FBtr0306904 // CG43318 // CG43318 gene product from transcript CG43318-RA // 89A5-89A5	CG43318	FBtr0306904	0.338595	1.16847	2.83e-05	2.19373	0.573953	0.000281482
10533	18188283	FBtr0084811 // CG11854 // CG11854 gene product from transcript CG11854-RB // 96C7-96C7	CG11854	FBtr0084811	2.13e-11	7.74732	5.03e-10	5.97441	3.18953e-09	3.6816e-08
4476	18153820	FBtr0089047 // CG30385 // CG30385 gene product from transcript CG30385-RA // 43A1-43A1	CG30385	FBtr0089047	0.000951042	1.61263	2.53e-08	2.63082	0.00831881	9.40653e-07
12063	18197333	FBtr0300059 // CG9616 // CG9616 gene product from transcript CG9616-RB // 88B1-88B1 //	CG9616	FBtr0300059	1.79e-08	4.19454	1.31e-07	3.65341	1.03238e-06	3.68652e-06
8530	18177371	FBtr0076291 // CG6527 // CG6527 gene product from transcript CG6527-RA // 67E4-67E4 //	CG6527	FBtr0076291	0.0966154	1.29358	9.17e-06	2.21606	0.25924	0.000113993
9957	18185185	FBtr0081907 // CG11760 // CG11760 gene product from transcript CG11760-RB // 85A9-85A9	CG11760	FBtr0081907	4.76e-10	2.53509	1.2e-07	2.04082	4.41436e-08	3.4242e-06
975	18134465	FBtr0079803 // CG3748 // CG3748 gene product from transcript CG3748-RC // 30A8-30A8 //	CG3748	FBtr0079803	0.000127902	1.98283	3.92e-06	2.39973	0.00168492	5.75898e-05
10328	18187061	FBtr0273217 // CG17751 // CG17751 gene product from transcript CG17751-RB // 92A10-92A1	CG17751	FBtr0273217	4.13e-06	3.31666	8.66e-10	6.4503	0.000101064	5.72261e-08
15871	18218722	FBtr0306720 // CG43278 // CG43278 gene product from transcript CG43278-RA // 7B3-7B3 //	CG43278	FBtr0306720	0.806815	1.04048	0.00013367	2.0164	0.91159	0.000981692
1616	18137607	FBtr0306300 // CG42490 // CG42490 gene product from transcript CG42490-RB // 36F9-36F10	CG42490	FBtr0306300	7.13e-11	3.69202	2.2e-13	5.20844	8.95199e-09	5.818e-11
7102	18169266	FBtr0075770 // CG6661 // CG6661 gene product from transcript CG6661-RA // 70C15-70C15 /	CG6661	FBtr0075770	0.153625	1.28082	4.9e-05	2.21945	0.351925	0.000440406
10165	18186284	FBtr0082924 // CG3259 // CG3259 gene product from transcript CG3259-RA // 88B3-88B3 //	CG3259	FBtr0082924	2.96e-11	4.14541	1.2e-10	3.81962	4.2755e-09	1.18705e-08
12040	18197229	FBtr0082861 // CG9759 // CG9759 gene product from transcript CG9759-RA // 87F4-87F4 //	CG9759	FBtr0082861	0.645152	1.08518	0.000130378	2.15482	0.822477	0.000962909
6747	18167262	FBtr0072778 // CG12020 // CG12020 gene product from transcript CG12020-RA // 62B4-62B4	CG12020	FBtr0072778	0.339695	1.19893	0.00056236	2.05279	0.575254	0.00305249
4527	18154087	FBtr0300405 // CG33225 // CG33225 gene product from transcript CG33225-RB // 57F2-57F2	CG33225	FBtr0300405	0.671422	1.06923	9.14e-05	2.01816	0.837584	0.000722786
10088	18185826	FBtr0301723 // CG14736 // CG14736 gene product from transcript CG14736-RE // 87A5-87A5	CG14736	FBtr0301723	0.613688	1.07254	1.59e-05	2.01603	0.800497	0.000176065
11567	18194518	FBtr0084728 // CycB3 // Cyclin B3 // 96B1-96B1 // 42971 /// NM_143046 // CycB3 // Cycli	CycB3	FBtr0084728	0.0821612	1.23076	4.84e-07	2.07787	0.231213	1.10333e-05
16118	18219643	---	NA	---	7.03e-07	3.28971	4.5e-08	3.97527	2.32746e-05	1.5113e-06
5967	18162688	FBtr0086820 // CG30110 // CG30110 gene product from transcript CG30110-RA // 54F5-54F5	CG30110	FBtr0086820	0.295296	1.21036	9.38e-05	2.23474	0.528216	0.000738545
7240	18169932	FBtr0114373 // CG6893 // CG6893 gene product from transcript CG6893-RB // 75D6-75D6 //	CG6893	FBtr0114373	0.00124773	1.5812	9.56e-08	2.4379	0.010239	2.85262e-06
7433	18170921	FBtr0331558 // CG32165 // CG32165 gene product from transcript CG32165-RA // 73A11-73B1	CG32165	FBtr0331558	0.478851	1.21679	0.0121979	2.07238	0.703556	0.0368352
5386	18159575	FBtr0088191 // Listericin // CG9080 gene product from transcript CG9080-RA // 47E1-47E1	Listericin	FBtr0088191	0.766907	1.04817	3.3e-05	2.14486	0.890542	0.00031947
12535	18199958	FBtr0301672 // CG12516 // CG12516 gene product from transcript CG12516-RB // 98C3-98C3	CG12516	FBtr0301672	0.136135	1.25295	1.78e-05	2.10995	0.325758	0.000192405
10287	18186865	FBtr0083546 // CG14316 // CG14316 gene product from transcript CG14316-RA // 90F3-90F3	CG14316	FBtr0083546	0.139585	1.26283	1.24e-05	2.22373	0.331038	0.000145189
14732	18212607	FBtr0070490 // w // white // 3B6-3B6|1-1.5 cM // 31271 /// NM_057439 // w // white // 3	w	FBtr0070490	4.36e-10	3.20178	2.46e-11	3.73	4.06651e-08	3.34601e-09
660	18132768	NM_135850 // Cyp28a5 // CG8864 gene product from transcript CG8864-RA // 34E5-34E5 // 3	Cyp28a5	NM_135850	6.13e-14	2.07682	5.6e-14	2.0821	2.17508e-11	1.69265e-11
4577	18154263	NM_137485 // GstE7 // Glutathione S transferase E7 // 55C7-55C7 // 37112 /// FBtr008667	GstE7	NM_137485	9.47e-10	2.39579	7.22e-11	2.65882	8.09264e-08	7.85632e-09
870	18133888	FBtr0079190 // CG9147 // CG9147 gene product from transcript CG9147-RB // 26B4-26B4 //	CG9147	FBtr0079190	1.22e-16	5.30872	4.18e-18	6.56539	9.05129e-14	4.5484e-15
10918	18190428	FBtr0081749 // CG31473 // CG31473 gene product from transcript CG31473-RA // 84E1-84E1	CG31473	FBtr0081749	0.488179	1.10564	3.24e-05	2.00391	0.710546	0.000314781
5816	18161836	FBtr0072045 // Prosbeta5R // Proteasome beta5R subunit // 59D6-59D6 // 37690 /// NM_137	Prosbeta5R	FBtr0072045	0.322311	1.17764	0.000160107	2.01012	0.557579	0.00113571
5865	18162102	FBtr0300366 // CG13577 // CG13577 gene product from transcript CG13577-RB // 60C4-60C4	CG13577	FBtr0300366	0.104361	1.29717	6.33e-06	2.32515	0.273109	8.48262e-05
7388	18170688	FBtr0075375 // retinin // CG13057 gene product from transcript CG13057-RA // 72E1-72E1	retinin	FBtr0075375	0.0655402	1.3053	9.9e-13	4.98965	0.197152	2.08001e-10
9898	18184898	FBtr0089748 // CG2336 // CG2336 gene product from transcript CG2336-RA // 83F3-83F3 //	CG2336	FBtr0089748	0.964876	-1.00956	0.00274337	2.00905	0.985279	0.0109106
6371	18164948	NR_048085 // snoRNA:lola-d // ncRNA // 47A11-47A11 // 12798400	snoRNA:lola-d	NR_048085	2.96e-08	3.15948	1.53e-11	5.04084	1.57886e-06	2.17154e-09
10349	18187183	FBtr0083864 // CG10887 // CG10887 gene product from transcript CG10887-RA // 92D1-92D1	CG10887	FBtr0083864	0.381233	1.20682	0.00169777	2.06949	0.615826	0.0073896
2876	18144874	FBtr0081058 // CG31802 // CG31802 gene product from transcript CG31802-RA // 36F1-36F1	CG31802	FBtr0081058	0.567099	1.09407	1.44e-05	2.2223	0.768978	0.000162994
4576	18154261	NM_137486 // GstE8 // Glutathione S transferase E8 // 55C7-55C8 // 37113 /// FBtr008667	GstE8	NM_137486	1.42e-07	2.10384	9.94e-09	2.34082	6.08327e-06	4.29208e-07
4873	18155949	NR_048086 // CR43605 // ncRNA // 47B11-47B11 // 12798401	CR43605	NR_048086	1.62e-07	2.45554	3.03e-10	3.3684	6.79734e-06	2.41247e-08
1939	18139448	FBtr0080051 // cdc2 // CG5363 gene product from transcript CG5363-RA // 31D11-31D11 //	cdc2	FBtr0080051	0.018792	1.33624	1.36e-06	2.0083	0.081771	2.50258e-05
1066	18134965	FBtr0080239 // CG4970 // CG4970 gene product from transcript CG4970-RB // 32F2-32F2 //	CG4970	FBtr0080239	0.000224435	1.69275	8.16e-08	2.40648	0.00267681	2.50659e-06
[truncated: 254 more rows]

## Sheet: Downregulated
Column #	Probeset ID	gene_assignment	Gene_Symbol	RefSeq	p_val_Whole_3days	Fold_Change_Pink1_W_3d vs_ Control_W_3d	p_val_Whole_30days	Fold_Change_Pink1_W_30d vs_ Control_W_30d	p_Adj_BH_day3	p_Adj_BH_day30
[truncated: 266 more rows]
