# Supplementary material for: Gut-brain axis neurodegeneration in a Drosophila model of Parkinson’s disease is linked to mitochondrial dysfunction
Source: Research Square preprint supplement (doi:10.21203/rs.3.rs-100637/v1), 2020-12-16
Supplement: Supplementary file 4 [file f5d2845ad3a17a888db2f962.xlsx]

## Sheet: iRegulon results pink1 IMD all
; Name	IMD_UP_ALL.txt
; Species and nomenclature	Drosophila melanogaster, FlyBase names
; Motif collection	10K (9713 PWMs)
; Minimum NEScore	2.5
; Rank threshold for visualization	5000
; ROC threshold for AUC calculation (%)	0.01
; Minimum identity between orthologous genes	0
; Maximum false discovery rate (FDR) on motif similarity	0.001
; Motif rankings database	136K regions (11 species)
; Number of valid nodes	42
; iRegulon version	iRegulon v1.3 (build: 2015-02-12)
; Overlap fraction	0.4
; Putative regulatory region	5kb upstream and full transcript
# Rank	Motif id	AUC	NES	ClusterCode	Transcription factor	Target genes
1	selexconsensus-Rel	0.069551	16.782	M1	Rel,dl	Dpt,DptB,PGRP-SB1,CG9733,Listericin,AttA,AttD,pirk,Gadd45,CG9733,Dro,Mtk,PGRP-SD,AttB,AttA,CecB,Dpt,PGRP-SC1b,CG10910,CG42807,Gadd45,PGRP-LF,CG13641,CecB,LysD,Drs,LysX,Mtk,CG11459,AttA,Dro,PGRP-LF,CG5791
2	homer-M00234	0.0612689	14.6899	M2	Tbp,Taf1	LysX,Gadd45,Mtk,pirk,LysD,CG17107,CG13641,AttB,AttA,CG5791,Dro,Dpt,DptB,IM2,TotA,AttD,PGRP-SC2,CG9733,CecB,Dpt,proPO-A1,CG9928,AttA,CecB,IM1,Arc2,CG15065,IM1,IM23,Listericin,PGRP-SC1b,lectin-37Da,Uro,LysX,CG4269,CG42807,Drs
3	stark-GGGGAWYCMC	0.057707	13.7901	M1	Rel	Dpt,DptB,PGRP-SB1,CG9733,AttD,Dro,pirk,AttA,Listericin,Gadd45,CG9733,CecB,PGRP-SD,Mtk,Dpt,CG42807,PGRP-LF,AttB,AttA,AttA,Dro,CG13641,Drs,Gadd45,LysD,PGRP-SC1b
4	flyfactorsurvey-Rel_SANGER_5_FBgn0014018	0.0498969	11.8172	M3	Rel	Gadd45,Dpt,pirk,Listericin,CG9733,PGRP-LF,PGRP-LF,CecB,PGRP-SD,CG5791,AttA,AttB,AttA,AttA,Dro,LysX,pirk,Arc2,Gadd45,CG9733,CG5550,CG9701,CG13641,CecB,pirk,Mtk,Dro,Dpt,DptB,AttD,Mtk,PGRP-SB1,CG10910,CG5550,CecB,LysX
5	selexconsensus-dif_Rel	0.0492307	11.6489	M1	Rel,shn,dl	Dpt,DptB,PGRP-SB1,CG9733,CG9733,Gadd45,Dro,AttA,AttD,PGRP-SD,Listericin,PGRP-LF,Dpt,pirk,Mtk,CG10910,CecB,CG13641,CG42807,Gadd45,CG5791,pirk,CecB,PGRP-SC1b,CG5550
6	transfac_pro-M01239	0.0449323	10.5631	M3	Rel,dl,Dif,kn,E2f,Stat92E,ovo,pho,phol,NFAT	Gadd45,CG9733,AttA,Dpt,DptB,CG5791,pirk,Listericin,LysX,IM2,pirk,Dpt,AttB,AttA,CG13641,Mtk,PGRP-LF,PGRP-SD,CecB,CG9701,pirk,Gadd45,CG5550,Mtk,CG5550,AttA,Dro,Mtk,Dro,CG9733,IM1,IM23
7	taipale-NGGGGAWTCCCCN-NFKB2-DBD	0.0445272	10.4608	M1	Rel,dl	Listericin,CG9733,pirk,Gadd45,CG5791,PGRP-SD,CG10910,AttD,pirk,CG13641,PGRP-SB1,PGRP-LF,PGRP-SC1b,Gadd45,Dro,AttA,IM2,AttB,AttA,Mtk,CG4269,Dpt,DptB,AttA,Dro,CecB,LysX,Mtk,CG11459,CG5550,AttD,CG9733,IM1,IM23,LysX,lectin-37Da
8	stark-GGGGAWTCCCY	0.0435464	10.213	M1	Rel,shn	Dpt,DptB,Gadd45,PGRP-SB1,CG9733,Listericin,CG5791,pirk,CG9733,AttA,CG13641,Dpt,PGRP-SD,AttD,CG10910,Gadd45,CecB,CG5550,Dro,CG42807,Mtk,AttB,AttA,IM1,IM23,PGRP-LF,PGRP-LF
9	swissregulon-TBP.p2	0.0429237	10.0557	M2	Tbp,Taf1	CG17107,Gadd45,LysX,PGRP-SC2,LysD,Mtk,pirk,Dro,TotA,CG9733,AttD,Mtk,CG13641,CG42807,proPO-A1,IM2,CG5791,Mtk,Arc2,Dpt,DptB,PGRP-SC1b,Listericin,IM1,IM23,AttB,AttA,Uro,CecB,CG4269,CG9928,IM1,Dpt,CG9701,lectin-24A
10	transfac_pro-M01223	0.0425354	9.95763	M1	dl,Dif,ovo,kn,Stat92E	Dpt,DptB,Gadd45,Gadd45,AttD,Listericin,pirk,CG9733,CG5791,CG13641,Dpt,Mtk,CG9733,Mtk,pirk,IM1,IM23,AttA,PGRP-SD,CecB,IM2,LysX,CG10910,pirk,PGRP-SB1,AttA,Dro,Mtk,CG5550,CecB
11	homer-M00137	0.0410557	9.58386	M1	Rel,dl,Dif,ovo	CG5791,pirk,Gadd45,CG9733,Gadd45,AttD,Listericin,CG9733,Dpt,DptB,Mtk,CG5550,CG13641,CG11459,IM1,IM23,Dpt,Drs,AttA,PGRP-SD,LysX,CG42807,AttA,Dro,PGRP-SB1,PGRP-LF,CG10910,LysD,PGRP-SC1b,PGRP-LF,CecB,AttB,AttA
12	tiffin-TIFDMEM0000083	0.0404732	9.43671	M4		LysX,CG17107,Gadd45,LysD,pirk,IM2,Mtk,CG13641,CG9733,IM1,Dpt,DptB,CG9928,CG15065,CG5791,Dro,Arc2,Mtk,Gadd45,CG11459,CecB,PGRP-SC1b,LysX,AttB,AttA,TotA,PGRP-SC2,CecB,lectin-37Da,Listericin,lectin-24A,Uro,CecB,CG9701,CG9616
13	factorbook-TBP	0.0403828	9.41388	M2	Tbp,Taf1	pirk,Gadd45,CG17107,LysX,AttD,CG5791,LysD,IM2,CecB,PGRP-SC2,PGRP-SC1b,Dro,Mtk,Dpt,DptB,proPO-A1,AttA,PGRP-SB1,IM1,IM23,CG13641,AttB,AttA,Listericin,IM1,TotA,Dpt,Mtk
14	jaspar-MA0105.1	0.0396597	9.23122	M1	Rel,Dif,ovo,rb	Listericin,pirk,CG9733,CG5791,Dpt,DptB,Gadd45,AttD,Gadd45,CG13641,CG9733,AttA,PGRP-SD,Mtk,CG11459,AttB,AttA,Dro,IM1,IM23,PGRP-LF,AttA,Dro,Dpt,CG10910,CecB,PGRP-LF,PGRP-SB1,LysX
15	transfac_pro-M03557	0.0390906	9.08746	M1	Rel,dl,Dif,ovo,kn,Stat92E	Dpt,DptB,pirk,Gadd45,Gadd45,AttD,Listericin,CG13641,CG5791,AttA,CG9733,CG9733,Mtk,Dpt,PGRP-SD,LysX,IM2,Dro,CecB,AttB,AttA,PGRP-SD,LysX,IM1,IM23,PGRP-LF,pirk,Gadd45,CG10910,IM10
16	tfdimers-MD00143	0.0384546	8.92679	M1	shn,Rel	Dpt,DptB,CG9733,PGRP-SB1,AttA,Gadd45,pirk,CG9733,Gadd45,PGRP-LF,PGRP-SD,CecB,AttD,Dpt,Dro,CG13641,CG9701,Mtk,Mtk,CG10910,pirk,CG9701,CecB,AttB,AttA,CG5550,CG9989,Listericin,CG9701,LysX,LysX,IM1,IM23,AttA,Dro,CG15065
17	factorbook-NFKB1	0.038083	8.83292	M1	Rel,dl,Dif,kn,Stat92E,ovo,rb	Gadd45,CG5791,CG13641,Listericin,pirk,CG9733,IM2,CG9733,LysX,Mtk,CG15065,AttA,CecB,IM1,IM23,pirk,Gadd45,Mtk,pirk,AttA,Dro,Dpt,DptB,CG9928,AttD,CG9733,PGRP-SC1b,AttB,AttA,Dro,CG5550
18	transfac_public-M00051	0.038083	8.83292	M1	Rel,shn	Dpt,DptB,CG9733,CG9733,Listericin,Gadd45,Gadd45,CG5791,pirk,Mtk,CG13641,Dpt,AttD,CG11459,PGRP-LF,CecB,PGRP-SD,CG10910,PGRP-SB1,CG5550,AttA,IM1,IM23,AttB,AttA,CG42807,CG5550
19	transfac_public-M00054	0.0379859	8.8084	M3	dl,Dif,Rel,ovo,rb,kn,Stat92E	Gadd45,CG13641,Listericin,CG5791,Dpt,DptB,Gadd45,pirk,CG9733,CG9733,Mtk,AttA,Dpt,IM2,CG9928,CecB,IM1,IM23,LysX,CG10910,PGRP-SB1,AttD,CecB,PGRP-SD,AttB,AttA,AttD,CG15065,Mtk
20	jaspar-MA0061.1	0.0371791	8.60459	M3	dl,Dif,ovo,rb,kn,Stat92E	Gadd45,CG13641,CG5791,Listericin,Dpt,DptB,Gadd45,pirk,CG9733,CG9733,Mtk,AttA,Dpt,IM2,CecB,CG9928,LysX,CG10910,IM1,IM23,PGRP-SB1,CecB,Mtk,CG15065,PGRP-SD,AttD,AttB,AttA,AttD,LysX,CG5550
21	taipale-NGGGGAWTCCCCN-NFKB1-DBD	0.0369314	8.54202	M1	Rel,shn	CG9733,pirk,Listericin,PGRP-SB1,Gadd45,PGRP-SD,Dro,CG10910,AttD,PGRP-SC1b,PGRP-LF,PGRP-LF,AttB,AttA,LysX,AttA,CecB,lectin-37Da,Drs,AttA,Dro,Gadd45,CG4269,CG13641,Mtk,CG5791,IM2,pirk,CG13641,IM10,CG9701,IM1,IM23
22	jaspar-MF0003.1	0.0365598	8.44815	M3	dl,Dif,ovo,pho,phol,kn,Stat92E,NFAT,rb,Deaf1	Gadd45,CG5791,IM2,CG13641,Listericin,Gadd45,Dpt,DptB,pirk,CG9733,IM1,IM23,Mtk,Dpt,AttA,AttD,CG15065,LysX,CG9733,CecB,CG9733,CG9928
23	homer-M00293	0.0356292	8.21306	M3	dl,Dif,ovo,kn,Stat92E,pho,phol,NFAT,rb,Deaf1	Gadd45,CG5791,IM2,CG13641,Listericin,Gadd45,Dpt,DptB,pirk,CG9733,IM1,IM23,Mtk,Dpt,AttA,CG15065,AttD,LysX,CG9733,CecB,CG9733,CG9928,PGRP-LF,LysX,CG5550,Mtk
24	flyfactorsurvey-dl_NBT_FBgn0000462	0.0348157	8.00757	M1	dl,Dif,pho,phol	Gadd45,CG13641,Gadd45,Dpt,DptB,CG9733,Listericin,IM2,CG5791,IM1,IM23,pirk,CG15065
25	swissregulon-NFKB1_REL_RELA.p2	0.0343771	7.89679	M3	dl,Dif,Rel,ovo,NFAT	Gadd45,Listericin,pirk,CG9733,Gadd45,CG5791,CG13641,Mtk,PGRP-LF,IM2,pirk,IM1,IM23,LysX,AttA,CG10910,Dpt,DptB,Dro,Mtk,CG10910,CG15065,AttB,AttA,CG9733,CecB,CG5550,AttA,Dro,Dpt,AttD
26	tfdimers-MD00521	0.0338783	7.77078	M3	Tbp	pirk,CG9701,PGRP-LF,Mtk,PGRP-LF,PGRP-SD,pirk,CG9733,Gadd45,pirk,CecB,CG9733,LysX,CG9701,LysD,Arc2,lectin-24A,pirk,TotA,proPO-A1,Listericin,IM10,LysX,CG9701,Dpt
27	homer-M00529	0.0337913	7.7488	M1	dl	Gadd45,Gadd45,CG9733,CG13641,IM2,CG15065,IM1,IM23,CG5791,Listericin,Dpt,DptB,PGRP-SD,AttD
28	homer-M00142	0.0336741	7.7192	M1	Rel,dl,Stat92E,Dif,rb,pho,phol,ovo,kn,E2f,Usf	Gadd45,CG13641,Listericin,IM2,CG5791,Dpt,DptB,pirk,CG9733,Gadd45,AttA,CG9733,LysX,IM1,IM23,Mtk,AttD,CG9928,PGRP-LF,CecB,CG15065,CG9733,Dpt,CG5550,AttB,AttA,Dro
29	tfdimers-MD00067	0.0332758	7.61857	M1	dl,kn,Dif	Gadd45,CG13641,pirk,Listericin,AttD,CG5791,Gadd45,Dpt,DptB,CG11459,CG9733,Mtk
30	transfac_pro-M00774	0.0324355	7.40631	M1	dl,Dif,Rel,ovo,kn,rb	Gadd45,pirk,CG13641,IM2,Listericin,CG5791,Gadd45,AttD,CG9733,CG9733,CG15065,AttA,CG9928,Mtk,CG10910,LysX,Dpt,DptB,IM1,IM23,CecB,Mtk,pirk,AttA,Dro,CG9733,AttB,AttA,Dro,PGRP-SD,Mtk,CecB
31	stark-GGGGAMWWCCM	0.0313709	7.13739	M1	shn	Gadd45,Gadd45,AttD,pirk,Dpt,DptB,CG5791,Listericin,CG13641,CG5550,Mtk,IM1,IM23,LysX,CG9733,LysX,AttD,CG9733,AttA,Dro
32	selexconsensus-shn-ZFP2	0.0310194	7.0486	M1	shn,dl,kn,Dif,ovo,pho,phol	pirk,Gadd45,Gadd45,Listericin,CG5791,Dpt,DptB,CG13641,AttD,CG5550,Mtk,LysX,Sr-CII,AttB,AttA,CG9733,CG11459,CG4269,Dro,LysX
33	tfdimers-MD00035	0.030303	6.86763	M1	Stat92E,dl,kn	Gadd45,Dpt,DptB,CG5791,CG13641,CG9733,Gadd45,LysX,CG4269,pirk,CG9701,CG5550,CecB,Mtk,Mtk,LysX,AttD,IM1,IM23,Listericin,CG15065,CG9701,pirk,CG10910,CG9989
34	transfac_public-M00208	0.0301055	6.81774	M3	Rel,Dif	CG13641,Gadd45,AttD,CG5791,IM2,IM1,IM23,Listericin,Gadd45,Mtk,Dpt,DptB,pirk,LysX,CG15065,AttA,CG9733,CG9733,CG10910,CG9733,Dro
35	transfac_pro-M03545	0.0295096	6.66721	M3	dl,Dif,kn,Stat92E,ovo	Gadd45,Dpt,DptB,CG9733,IM2,Listericin,CG5791,AttD,CG13641,Dpt,LysX,Gadd45,IM1,IM23,AttA,CG9733,CG15065,pirk,AttB,AttA,Mtk,CG9928
36	transfac_pro-M03563	0.0294795	6.6596	M1	dl,Dif,ovo,rb,kn,Stat92E,E2f	Gadd45,CG5791,IM2,CG13641,Listericin,Gadd45,pirk,LysX,CG9733,Dpt,IM1,IM23,Mtk,CG9928,LysX,Dpt,DptB,Mtk,CG15065,IM10,CG9733,CG9733,CecB,AttD,AttA
37	jaspar-MA0023.1	0.0276651	6.20126	M3	dl,Dif,NFAT	Gadd45,CG5791,Listericin,Gadd45,Dpt,DptB,IM1,IM23,CG13641,IM2,CG9733,AttD,CG15065,LysX,Mtk,Sr-CII,lectin-24A,LysX,CG9733,pirk,CecB,Dpt
38	transfac_public-M00053	0.0276015	6.18519	M3	dl,Dif,pho,phol,ovo,kn,Stat92E,NFAT	Gadd45,IM2,CG5791,Gadd45,Dpt,CG9733,IM1,IM23,CG13641,Listericin,Dpt,DptB,CG15065,LysX,CG5550,lectin-24A,LysX,CG9928,CG5550,Sr-CII,Mtk,CG5550,CG9733
39	transfac_public-M00194	0.0271797	6.07864	M1	Rel,Dif,E2f,ovo,kn,Stat92E	pirk,CG5791,AttD,CG9733,Listericin,CG9733,Dpt,DptB,Gadd45,CG13641,Gadd45,IM2,Dro,AttA,pirk,LysX,Mtk,Mtk,CecB,PGRP-SB1,Drs,CecB,PGRP-SD,CG10910,LysX,Dpt,pirk,PGRP-SC1b
40	transfac_public-M00052	0.0265034	5.90782	M3	dl,Dif,ovo,kn,Stat92E	Gadd45,IM2,CG5791,Listericin,CG13641,IM1,IM23,CG9928,Gadd45,CG9733,Dpt,DptB,CG9733,pirk,LysX,Dpt,CG15065,CecB,lectin-24A,AttA,Mtk,CG5550,CG9733
41	jaspar-MA0101.1	0.0261218	5.81141	M3	dl,Dif,pho,phol,ovo,kn,Stat92E,NFAT	Gadd45,IM2,CG5791,Gadd45,Dpt,CG9733,IM1,IM23,LysX,CG13641,Listericin,Dpt,DptB,CG15065,lectin-24A,CG5550,Sr-CII,LysX,CG9928,Mtk,CG5550
42	homer-M00320	0.0251342	5.56194	M1	dl,Rel,Dif,ovo,Stat92E	Gadd45,Gadd45,Dpt,DptB,CG13641,CG5791,CG9733,Listericin,AttD,CG9733,PGRP-SD,pirk,AttA,AttD,PGRP-LF,Mtk,CecB,LysX,IM1,IM23,Dpt,CG5550,CG42807
43	selexconsensus-dl-B	0.0251342	5.56194	M1	dl,Rel,Dif,ovo,Stat92E	Gadd45,Gadd45,Dpt,DptB,CG13641,CG5791,CG9733,Listericin,AttD,CG9733,PGRP-SD,pirk,AttA,AttD,PGRP-LF,Mtk,CecB,LysX,IM1,IM23,Dpt,CG5550,CG42807
44	flyfactorsurvey-shn-F1-2_SOLEXA_FBgn0003396	0.0236111	5.17717	M1	shn	Dpt,DptB,CG9733,Dpt,AttD,pirk,IM2,CG9733,Listericin,AttD,AttA,CG9733,Gadd45,CG13641,Gadd45,Mtk,PGRP-SB1,CecB,PGRP-LF,CG4269,LysX,PGRP-SD,CG5791,lectin-24A
45	jaspar-MA0108.1	0.0227574	4.96153	M2	Tbp,Taf1	CG17107,pirk,LysX,Gadd45,TotA,Mtk,PGRP-SC2,LysD,AttD,CG4269,CG9733,Mtk,Dro,proPO-A1,CG5791,CG13641,Mtk,PGRP-SB1,AttA,AttB,AttA,lectin-24A,Dpt,DptB,PGRP-SC1b,IM2,CG42807
46	stark-STATAWAWRSVVV	0.022657	4.93616	M2	Tbp,Taf1	CG17107,CG4269,Gadd45,LysD,LysX,CG5791,CG13641,Dro,PGRP-SC2,AttD,TotA,AttB,AttA,Mtk,PGRP-SB1,CecB,lectin-24A,Mtk
47	homer-M00562	0.0226235	4.92771	M1	dl,Dif,ovo,pho,phol	Gadd45,IM2,CG9733,CG5791,CG13641,Gadd45,Listericin,Dpt,DptB,IM1,IM23,pirk,AttD,LysX,CG9928,CG15065,IM10,CG9733,CecB,CecB,AttA
48	jaspar-MA0107.1	0.0225599	4.91164	M3	dl,Dif,ovo,kn,Stat92E	Gadd45,IM2,CG5791,Listericin,CG13641,CG9928,CG9733,IM1,IM23,Gadd45,LysX,Dpt,DptB,pirk,CG9733,Dpt,CG15065,CecB,lectin-24A,CG5550,AttA,IM10
49	transfac_public-M00252	0.0223858	4.86767	M2	Tbp,Taf1	CG17107,pirk,LysX,Gadd45,TotA,Mtk,PGRP-SC2,LysD,AttD,CG4269,CG9733,Mtk,Dro,CG5791,proPO-A1,CG13641,Mtk,PGRP-SB1,AttA,AttB,AttA,lectin-24A,PGRP-SC1b,Dpt,DptB,IM2,CG42807
50	flyfactorsurvey-shn-F1-2_SANGER_5_FBgn0003396	0.0222954	4.84483	M1	shn	Dpt,DptB,CG9733,CG13641,pirk,Gadd45,CG9733,Gadd45,CG5791,PGRP-LF,Dpt,LysX,AttD,PGRP-SD,CG4269,Listericin,Mtk,CG42807,CG5550,AttA,PGRP-SB1,IM1,IM23,IM2,LysX,CecB,AttD
51	tfdimers-MD00503	0.0216661	4.68585	M1	kn,E2f,Stat92E,Dif,rb,Usf,ovo	Gadd45,AttD,pirk,Listericin,CG5791,CG9733,Gadd45,CG13641,Dpt,DptB,CG9701,Mtk,AttA,Dro,LysX,CecB,Mtk,Drs,PGRP-SD,CG11459
52	transfac_public-M00043	0.0215288	4.65118	M3	dl	Gadd45,CG15065,CG5791,CG13641,PGRP-SD,IM2,IM1,IM23
53	iDMMPMM-DL	0.0208693	4.48459	M1	dl,Dif,ovo,pho,phol	Gadd45,IM2,CG5791,CG9733,Gadd45,CG13641,IM1,IM23,CG15065,PGRP-SD,AttD,Dpt,DptB,Listericin,LysX,AttD,Dro
54	tfdimers-MD00021	0.0208459	4.47867	M3	NFAT,dl,Dif,kn,Stat92E	CG5791,Gadd45,pirk,Mtk,CG13641,IM1,IM23,Dro,LysX
55	tfdimers-MD00441	0.02024	4.3256	M1	ovo,dl,Dif,rb,kn	CG5791,Gadd45,pirk,LysX,Listericin,CG13641,CG9733,Mtk,Gadd45,CG11459,AttA,Dro,Mtk,CG10910,CecB,CG9733,CG4269,PGRP-SD,CecB
56	homer-M00321	0.019855	4.22835	M3	dl	CG5791,Gadd45,CG15065,IM2,CG13641,IM1,IM23,PGRP-SD,PGRP-SD,Dro,AttA,Dro,CG9928,proPO-A1,CecB,lectin-24A,CG9733,IM1
57	jaspar-PF0086.1	0.0197679	4.20637	M3	dl,kn,Stat92E,Dif,ovo	CG5791,CG15065,CG13641,IM1,IM23,Gadd45,IM2,Dpt,DptB,LysX,Listericin,Mtk,CG9733,CG10910,IM1,Mtk,AttA,Dro,MstProx,CG9928
58	yetfasco-1241	0.0196809	4.18438	M5		Spn88Eb,CG4269,CG10910,CG11459,LysX
59	jaspar-PF0130.1	0.0186532	3.92477	M6	kn	CG11459,AttD,Sr-CII,Dpt,Gadd45
60	transfac_pro-M01224	0.0180171	3.76409	M1	dl,ovo,Dif,rb,kn	Gadd45,pirk,CG5791,CG13641,Gadd45,CG15065,CG9616,AttD,Dpt,DptB,CG9928,LysX,LysX,AttA,CG9733,Dro,CecB,IM1,IM23,AttB,AttA,CG5550,CG5550
61	homer-M00193	0.0179903	3.75733	M4	Tbp	LysX,Gadd45,LysD,TotA,CG42807,Sr-CII,lectin-24A,CG13641,Mtk,CecB,CG9928,PGRP-SC2,Dpt,CG15065,IM2,pirk,CG9733,CG5791,Mtk,CecB,CG17107,Dro,IM1,Arc2
62	homer-M00123	0.0175484	3.6457	M3	dl,Dif,Rel,ovo,kn,Stat92E	IM2,CG9928,CG5791,Listericin,Gadd45,Dpt,DptB,CG9733,IM1,IM23,AttA,CG13641,LysX,CG15065,CG10910,AttD,IM10,Dpt,AttB,AttA,CecB,Sr-CII
63	jaspar-MA0022.1	0.0173978	3.60765	M3	dl	Gadd45,IM2,CG5791,AttA,Dro,PGRP-SD,pirk,PGRP-LF,Gadd45,IM1,IM23,Listericin,pirk,LysX,CG15065,CG13641
64	tfdimers-MD00137	0.0172438	3.56875	M1	rb,kn,Dif,ovo	CG13641,AttA,Dro,Dpt,DptB,CG5791,Gadd45,CG9733,Gadd45,LysX,IM1,IM23,CG15065
65	elemento-AACGTGC	0.017207	3.55945	M7		DptB,Mtk,CG5550,PGRP-SD,Cpr67Fb
66	taipale-ATGAATTGCAGTCAT-Sox10-DBD	0.0171936	3.55606	M8	Sox100B,Sox15,SoxN	CG11459,Cpr67Fb,PGRP-LF,AttA,Dro,Sr-CII,CecB,CecB,LysX,Spn88Eb,CG9733,CG5791,Cpr67Fb,Dpt
67	yetfasco-1390	0.0170095	3.50955	M9	tgo	DptB,Mt2,Gadd45,Sr-CII,proPO-A1,CG9701,CG10910,MstProx,CG5550,IM2,lectin-24A,IM10,CecB,Cpr67Fb,CG5550,CG11459,Mtk,Dro
68	flyfactorsurvey-CG3838_SANGER_5_FBgn0032130	0.0164906	3.37848	M10	CG3838	CG5550,CG4269,MstProx,IM10,CG5550
69	taipale-SGTTGCYARGCAACS-RFX4-DBD	0.0162897	3.32774	M11	Rfx	Mtk,AttD,IM10,IM10,CG5550
70	tfdimers-MD00086	0.0161692	3.29729	M12	pho,phol,retn	Mtk,CG9701,CecB,CG10910,CecB,LysX
71	flyfactorsurvey-GATAd_SANGER_5_FBgn0032223	0.016032	3.26262	M13	GATAd,pnr	DptB,Dpt,DptB,CG10910,LysD,CG10910,Gadd45,AttA,IM2,CecB,CecB,Mtk,IM1,IM23,AttB,AttA,proPO-A1
72	tfdimers-MD00008	0.0159583	3.24402	M6	kn,EcR	CG11459,Sr-CII,Gadd45,Dpt
73	stark-TCANNNTGGA	0.0159047	3.23049	M14		CG11459,LysX,CG10910,Gadd45
74	tfdimers-MD00585	0.0158344	3.21273	M6	kn	Dpt,CG11459,AttD,PGRP-SD,Sr-CII
75	tfdimers-MD00057	0.0157675	3.19582	M15		CG9701,AttD,LysD,Sr-CII,Mtk,Dpt,DptB,CG10910,MstProx,CG9701
76	yetfasco-1326	0.015734	3.18736	M4		LysX,Mtk,Gadd45,TotA,CG9733,IM2,pirk,IM10,LysD,PGRP-SC2,Listericin,proPO-A1,PGRP-SC2
77	homer-M00254	0.0157039	3.17975	M13	grn	Dpt,DptB,CG11459,DptB,CG10910,CG5550,Gadd45,CG11459,proPO-A1,AttA,CG10910,CecB,CG9989,pirk,Gadd45,CG5550
78	taipale-AACAATRTKCAGWGTT-SOX9-full	0.0156804	3.17383	M16	Sox100B,D,Sox21a,Sox21b,SoxN	Uro,CG11459,TotM,pirk,TotA
79	transfac_pro-M01019	0.015657	3.16791	M17	bi,mid,H15	CG5550,CG11459,PGRP-SD
80	stark-CATNNNNCGCG	0.0156235	3.15945	M18		AttD,TotA,CG9733,MstProx,LysX
81	taipale-NAGGTCAMSRTGACCTN-ESR1-DBD	0.0155968	3.15269	M19	Eip78C,Eip75B,Hr38	CG5550,TotA,LysX,Drs,CG9701
82	encode-UW.Motif.0052	0.0155901	3.151	M3	kn,Stat92E,Dif,ovo,Deaf1	Gadd45,CG5791,CG15065,CG13641,IM2,IM1,IM23,LysX,CG9733,Dro
83	transfac_public-M00264	0.0155834	3.1493	M18		CG4269,MstProx,IM10,TotA,AttD
84	yetfasco-1936	0.0155231	3.13408	M20	CG9305,CG17209,Brf,CG33051	CG9733,AttD,CG4269,Mtk,Listericin,LysX,CG9701,AttB,Gadd45,CG5550,MstProx
85	taipale-NNTCCCNNGGGANN-EBF1-full	0.0154495	3.11548	M6	kn	Sr-CII,CG11459,Gadd45
86	encode-UW.Motif.0013	0.0153825	3.09857	M6	kn,Eip75B	CG11459,Sr-CII,Dpt,Gadd45
87	swissregulon-TBX4-5.p2	0.0152285	3.05967	M17	bi,mid,H15	CG11459,CG5550,PGRP-SD
88	yetfasco-1200	0.0149707	2.99455	M7		IM10,CG9701,PGRP-LF,IM2,LysD
89	tfdimers-MD00456	0.0149607	2.99201	M3	ovo,E2f	pirk,PGRP-LF,Gadd45,Arc2,CG5550,lectin-24A,pirk,pirk,MstProx,MstProx,TotA
90	transfac_pro-M00701	0.0148101	2.95396	M21		lectin-24A,CG11459,CG11459,IM10,Mtk,proPO-A1
91	homer-M00402	0.0147699	2.94381	M22	vvl	Sr-CII,CG10910,CG9701,TotA,IM10,pirk,CG11459,Mtk,TotA,lectin-24A,CG5550
92	swissregulon-AR.p2	0.0145155	2.87954	M19	Hsf	PGRP-LF,Cpr67Fb,Drs,Mtk,IM10,CG9733,lectin-24A,pirk,Dpt,DptB
93	tfdimers-MD00273	0.0144519	2.86348	M15	grn,pnr	IM2,Dpt,DptB,LysD,CG10910
94	tfdimers-MD00320	0.0143581	2.8398	M23	rb,vvl,CG17843,CG4670,CG31413,CG6690,SoxN,pan,Abd-B,Sox14,NFAT,pb	CG5550,Mtk,CG9616,CG9701,PGRP-SD,AttD
95	stark-CTTNNATAC	0.0143514	2.83811	M22		CG5550,PGRP-SC2,IM2,CG5791,PGRP-SD,LysD,CG17107
96	tfdimers-MD00077	0.0143213	2.83049	M17	HLH106,crp,cnc,Bgb,Bro,RunxA,lz,RunxB,run,pho,phol	proPO-A1,Mtk,LysX,Mtk
97	flyfactorsurvey-GATAe_SANGER_5_FBgn0038391	0.0143012	2.82542	M13	GATAe,srp,grn	DptB,LysD,CG10910,Dpt,DptB
98	transfac_pro-M00946	0.014251	2.81274	M9	CrebA,Atf3,CrebB-17A	Mtk,CG10910,CG5550,LysX
99	yetfasco-1822	0.0142476	2.81189	M9	dpn,h,E(spl)mgamma-HLH,E(spl)m5-HLH,Her	IM10,Sr-CII,CG11459
100	flyfactorsurvey-So_SOLEXA_FBgn0003460	0.0142242	2.80597	M24	so,Optix,Six4	Mtk,CG11459,CG10910,CG10910,CG5550,AttA,pirk,CG9701,CG5550,Mtk,PGRP-SC2
101	hdpi-HCLS1	0.0141707	2.79244	M25		AttD,IM10,AttD,Mtk
102	elemento-AGGATGC	0.0141405	2.78483	M26		IM10,PGRP-SD,Sr-CII
103	transfac_pro-M01154	0.0141003	2.77468	M9	Max,Mnt,tgo,Hey,Mio,emc	CG10910,Sr-CII,CG5550,CG9616,CG11459
104	flyfactorsurvey-Met_SANGER_5_FBgn0002723	0.0140937	2.77299	M9	Met,tai,cyc,Max,tgo	Mt2,MstProx,Gadd45,DptB,CG5550,CG10910,lectin-24A,CG9701,proPO-A1,MstProx,CG5550,Sr-CII,CG5550,Dro
105	taipale-AGGTGTGAWWWTCACACCT-TBX20-DBD	0.01403	2.75692	M27	H15,mid,Doc2,org-1,bi	CG5550,CG11459,proPO-A1,Gadd45,MstProx,AttD,Dro,Mtk,lectin-24A,CG11459
106	encode-UW.Motif.0093	0.0140167	2.75354	M28		AttD,IM10,DptB
107	transfac_pro-M01189	0.0139062	2.72563	M23		PGRP-SD,Dro,CG4269,Drs
108	encode-UW.Motif.0656	0.0138727	2.71718	M29		LysX,Drs,proPO-A1,IM2,PGRP-SD
109	encode-UW.Motif.0148	0.013856	2.71295	M15		Dpt,DptB,CG9701,AttD,CecB,Dpt,pirk,Listericin,CG9701,PGRP-SD,Sr-CII,CG5550,CG9733,TotA,CG5550
110	yetfasco-811	0.0137689	2.69096	M13	pnr,grn	DptB,AttB,AttA,AttA,LysD,Dpt,DptB,AttA,Dro,Mtk,proPO-A1,LysX,CG10910,CG9989,pirk,Dro,Gadd45,CecB,CG4269,pirk,PGRP-SC1b
111	encode-UW.Motif.0601	0.0137187	2.67828	M29		Mtk,Gadd45,IM10,PGRP-SD
112	yetfasco-1058	0.013712	2.67659	M9		Sr-CII,Gadd45,CG10910,CG5550,CecB,CG9616,CG11459,Dro,CG9701,Mt2,IM2,IM10,TotA
113	taipale-NAGGTGTGAWN-TBX2-full	0.0136417	2.65883	M17	bi,Doc2,mid,H15,org-1	CG11459,MstProx,PGRP-SD,CG5550
114	taipale-NRGTCCAAAGTCCANY-HNF4A-DBD	0.0136082	2.65037	M20	Hnf4	Gadd45,CG5550,CG4269,Mtk
115	yetfasco-1584	0.0136015	2.64868	M30		CG5550,Dpt,Sr-CII,Gadd45
116	yetfasco-1589	0.0136015	2.64868	M30		CG5550,Dpt,Sr-CII,Gadd45
117	transfac_public-M00086	0.0135982	2.64783	M1		CG13641,AttD,Dpt,DptB,IM10,IM10,IM2,CG42807,AttD,CG9701,MstProx
118	transfac_pro-M00707	0.0135279	2.63008	M2	TfIIA-S,TfIIA-S-2,TfIIA-L	CG4269,LysX,TotM,CG17107,TotA,LysD,PGRP-SC2,CG9733
119	transfac_pro-M01263	0.0135212	2.62838	M27	Doc2,org-1,H15,mid,bi	CG11459,proPO-A1,MstProx,CG5550
120	jaspar-CN0068.1	0.0134944	2.62162	M12		CG5550,Sr-CII,TotA,PGRP-SD,proPO-A1,CG5550,DptB,CG14957,Dpt,DptB,CG9701,Gadd45,TotA,CG17107
121	swissregulon-HIF1A.p2	0.0134911	2.62077	M9	tgo	Mtk,MstProx,Sr-CII,Mt2,CG9701,proPO-A1,CG17107,CG5550,IM10,TotA,CG5550,CecB,CG10910
122	yetfasco-491	0.0134308	2.60555	M13	pnr	DptB,LysD,CG10910,Dpt,DptB,pirk,PGRP-SC1b,Dro,Mtk,CG10910,AttA,proPO-A1,CG9989,CG5791,AttB,AttA
123	transfac_pro-M02012	0.0134208	2.60301	M9	tgo	DptB,CG4269,Mt2,lectin-24A,Mtk,Gadd45,Cpr67Fb,Sr-CII,IM10,Dro,CG5550,proPO-A1,PGRP-SD
124	flyfactorsurvey-CG13897_SANGER_5_FBgn0035160	0.0134007	2.59794	M21	CG13897	lectin-24A,CG11459,LysX,IM10
125	encode-UW.Motif.0118	0.0133806	2.59287	M24		DptB,CG10910,Mtk,CecB,CecB,CG4269,AttA,Dro,CG5550,LysD,AttA,Mtk,CecB,PGRP-SD,CG5550,AttB,AttA
126	hdpi-ZNF160	0.013317	2.5768	M15		CG9701,Dpt,Dpt,DptB,CG9733,Listericin,CG9733,pirk,CecB,CG9701,CG9733,LysX,DptB
127	homer-M00035	0.0132634	2.56327	M6	kn,Eip75B,EcR	CG11459,Sr-CII
128	homer-M00127	0.0132634	2.56327	M9	Max,Mnt,gce,tgo,Mio,emc,HLH4C,HLH3B,nau,sc,ase,l(1)sc,CG34422	CG5550,CG10910,CG9616,Sr-CII,CG9701,IM10,Mt2
129	homer-M00044	0.0132333	2.55566	M27	bi	CG11459,MstProx,Mtk,DptB,Mtk,CG5550,CG10910,lectin-24A,PGRP-SD,LysD
130	elemento-CTTATCA	0.0132266	2.55397	M13		DptB,Dpt,DptB,CG10910,LysD,Gadd45,CG10910,AttA,proPO-A1,CG11459,proPO-A1,CG9989,AttB,AttA,PGRP-SC1b,CG4269
131	transfac_pro-M00369	0.0132099	2.54974	M9	gce,Usf,Max,Mnt,CrebA,tgo,Atf3	CG10910,CG5550,CG9616
132	tfdimers-MD00343	0.0131898	2.54467	M29	p53,HLH4C,HLH3B,Max,nau,Hand,Mitf,da,Usf,CG34422,Myb,scro	Sr-CII,IM10,IM10,LysX
133	jaspar-MA0310.1	0.0131764	2.54128	M9		PGRP-SD,CG10910,CG5550,Gadd45,Mt2,lectin-24A,CG11459,CG9701,proPO-A1,CG9616
134	stark-GGTNTAAAW	0.0131764	2.54128	M4		CG11459,Drs,MstProx,CG17107
135	yetfasco-543	0.0131764	2.54128	M9		PGRP-SD,CG10910,CG5550,Gadd45,Mt2,lectin-24A,CG11459,CG9701,proPO-A1,CG9616
136	tfdimers-MD00081	0.0131563	2.53621	M31	ovo,ci,Ets65A,RunxA,lz,RunxB,run,Atac3,EcR	LysX,DptB
137	taipale-SGTTGCYARGCAACS-RFX2-DBD	0.013153	2.53536	M11	Rfx	Mtk,CG5550,IM10,IM10,CG14957,TotA
138	selexconsensus-srp	0.0131362	2.53113	M13	srp,pnr	LysD,DptB,Dpt,DptB,CG10910,CG5791,PGRP-SC1b,AttA,PGRP-SB1,pirk,PGRP-SC2,CG11459,Gadd45
139	yetfasco-2033	0.0131262	2.5286	M10		AttD,AttD,CG9701
140	jaspar-CN0220.1	0.0131128	2.52522	M14		CG5550,TotA,CG9701,PGRP-LF,pirk,Mtk,MstProx,PGRP-SD,CG9701,Dpt,DptB
141	jaspar-CN0211.1	0.0130994	2.52183	M32		CG9733,Sr-CII,MstProx,CG10910,CG9701,Listericin,Sr-CII,LysX,LysX,CG11459,CG4269,TotA,CG9701,CG9701
142	transfac_pro-M03127	0.0130793	2.51676	M9	tai,Clk,Hey,Her	Mt2,DptB,IM10,CG9701,CG11459,Sr-CII,proPO-A1,pirk,CecB,Mtk,CG10910,IM2,Dro,TotA
143	transfac_public-M00118	0.0130425	2.50746	M9	Max,Mnt,Hey,Mio,emc,tgo	CG5550,CG10910,Sr-CII,CG9616,CG11459
144	yetfasco-1329	0.0130324	2.50492	M4		Gadd45,CG9733
145	yetfasco-1090	0.0130258	2.50323	M33		CG9733,CG9701,AttD,Dpt,DptB
