# Supplementary material for: Gut-brain axis neurodegeneration in a Drosophila model of Parkinson’s disease is linked to mitochondrial dysfunction
Source: Research Square preprint supplement (doi:10.21203/rs.3.rs-100637/v1), 2020-12-16
Supplement: Supplementary file 5 [file bfc43aba04c194018753fc8b.xlsx]

## Sheet: P239 Ivana Celardo TMT experime
	Description	w11181	w11182	w11183	w11184	w11185	pink1B91	pink1B92	pink1B93	pink1B94	pink1B95	Fold-change	logFC	adj.P.Val
1	Bent, isoform F OS=Drosophila melanogaster GN=bt PE=1 SV=1	8.874	8.979	8.605	8.733	8.72	8.831	8.732	8.814	9.01	9.057	1.07624	0.106	0.386
2	Bent, isoform C OS=Drosophila melanogaster GN=bt PE=1 SV=1	4.732	4.927	4.776	4.967	4.702	4.62	4.842	4.798	4.639	4.828	0.949342	-0.075	0.474
3	Bent, isoform H OS=Drosophila melanogaster GN=bt PE=1 SV=1	7.604	7.962	7.705	7.811	7.486	8.265	8.294	8.144	7.893	8.183	1.35849	0.442	0.008
4	Sallimus, isoform P OS=Drosophila melanogaster GN=sls PE=4 SV=1	13.789	14.236	13.828	13.859	13.791	14.355	14.42	14.561	14.447	14.605	1.49174	0.577	0.001
5	Apolipophorins OS=Drosophila melanogaster GN=Rfabg PE=1 SV=2	15.187	15.065	14.87	14.895	15.171	14.597	14.958	14.778	14.832	14.917	0.857971	-0.221	0.084
6	Muscle-specific protein 300 kDa, isoform B OS=Drosophila melanogaster GN=Msp300 PE=1 SV=1	13.563	13.698	13.45	13.551	13.657	13.969	14.074	14.079	14.005	14.174	1.39088	0.476	0
7	Obscurin OS=Drosophila melanogaster GN=Unc-89 PE=1 SV=1	14.112	14.001	13.848	13.905	13.857	13.283	12.97	13.19	13.186	13.36	0.595841	-0.747	0
8	Fatty acid synthase 1, isoform C OS=Drosophila melanogaster GN=FASN1 PE=1 SV=2	13.983	13.923	13.83	13.94	14.203	13.724	14.064	13.987	13.919	14.164	0.997231	-0.004	0.981
9	Short stop, isoform H OS=Drosophila melanogaster GN=shot PE=1 SV=1	11.784	11.892	11.817	11.868	11.823	11.784	11.776	11.672	11.737	11.72	0.93368	-0.099	0.138
10	Alpha spectrin, isoform C OS=Drosophila melanogaster GN=alpha-Spec PE=4 SV=1	13.101	13.539	13.24	13.495	13.612	13.179	13.44	13.71	13.768	13.798	1.13367	0.181	0.348
11	Muscle-specific protein 300 kDa, isoform G OS=Drosophila melanogaster GN=Msp300 PE=1 SV=1	12.514	12.589	12.574	12.639	12.556	12.59	12.513	12.467	12.518	12.443	0.95396	-0.068	0.323
12	Futsch, isoform F OS=Drosophila melanogaster GN=futsch PE=1 SV=1	13.16	13.187	13.117	13.153	13.321	13.009	13.139	13.053	12.929	12.998	0.893785	-0.162	0.059
13	Ryanodine receptor, isoform E OS=Drosophila melanogaster GN=RyR PE=1 SV=1	7.634	7.688	7.558	7.619	7.878	6.959	7.026	7.136	7.224	7.263	0.681129	-0.554	0
14	Ryanodine receptor, isoform J OS=Drosophila melanogaster GN=RyR PE=1 SV=1	8.87	8.977	8.735	8.851	8.839	8.054	8.039	8.039	8.169	8.059	0.581157	-0.783	0
15	Myosin heavy chain, isoform P OS=Drosophila melanogaster GN=Mhc PE=1 SV=1	8.392	8.467	8.63	8.303	9.04	7.963	7.957	8.496	8.266	8.299	0.773782	-0.37	0.084
16	Calcium-transporting ATPase sarcoplasmic/endoplasmic reticulum type OS=Drosophila melanogaster GN=Ca-P60A PE=1 SV=2	6.591	6.719	6.862	6.886	6.671	6.609	6.285	6.472	6.46	6.589	0.833931	-0.262	0.03
17	Myosin heavy chain, isoform U OS=Drosophila melanogaster GN=Mhc PE=1 SV=1	5.597	5.609	5.912	5.737	6.208	5.684	5.503	6.095	5.796	5.788	0.973329	-0.039	0.854
18	Calcium-transporting ATPase OS=Drosophila melanogaster GN=SERCA PE=1 SV=1	6.595	6.63	6.292	6.728	6.52	6.478	6.407	6.513	6.086	6.484	0.895025	-0.16	0.261
19	Myosin heavy chain, isoform T OS=Drosophila melanogaster GN=Mhc PE=1 SV=1	5.787	5.784	6.08	5.72	6.19	5.672	5.231	6.066	5.315	5.416	0.772711	-0.372	0.099
20	Stretchin-Mlck, isoform U OS=Drosophila melanogaster GN=Strn-Mlck PE=1 SV=1	12.53	12.634	12.344	12.455	12.543	12.571	12.569	12.559	12.463	12.576	1.03311	0.047	0.601
21	Short stop, isoform O OS=Drosophila melanogaster GN=shot PE=1 SV=1	6.724	7.044	6.748	6.733	6.742	7.142	7.047	7.006	7.149	7.117	1.22603	0.294	0.01
22	Spectrin beta chain OS=Drosophila melanogaster GN=beta-Spec PE=1 SV=2	7.763	8.235	7.966	8.036	8.088	8.127	8.374	8.371	8.149	8.336	1.19251	0.254	0.057
23	Accessory gland protein Acp36DE OS=Drosophila melanogaster GN=Acp36DE PE=2 SV=1	12.844	12.539	11.691	12.167	13.036	11.763	12.436	12.677	11.551	12.925	0.879649	-0.185	0.688
24	Spectrin beta chain OS=Drosophila melanogaster GN=beta-Spec PE=3 SV=1	7.569	8.475	8.296	8.533	8.333	8.324	8.402	8.733	8.584	8.543	1.21083	0.276	0.239
25	Sodium/potassium-transporting ATPase subunit alpha OS=Drosophila melanogaster GN=Atpalpha PE=1 SV=3	6.182	6.12	5.964	6.095	6.048	6.207	6.441	6.013	6.008	6.21	1.06733	0.094	0.44
26	Sodium/potassium-transporting ATPase subunit alpha OS=Drosophila melanogaster GN=Atpalpha PE=1 SV=1	5.4	5.275	4.996	5.269	5.237	5.336	5.427	5.349	5.176	5.256	1.0519	0.073	0.517
27	Glycogen phosphorylase OS=Drosophila melanogaster GN=GlyP PE=2 SV=2	13.496	13.314	13.202	13.288	13.403	12.704	13.036	13.12	13.132	13.313	0.824162	-0.279	0.065
28	Stretchin-Mlck, isoform R OS=Drosophila melanogaster GN=Strn-Mlck PE=1 SV=2	12.078	13.402	13.068	13.313	12.924	12.154	11.679	12.161	12.531	12.55	0.59791	-0.742	0.043
29	Aconitate hydratase, mitochondrial OS=Drosophila melanogaster GN=Acon PE=1 SV=2	13.473	13.198	13.042	13.243	13.658	11.939	12.075	12.337	12.244	12.692	0.477973	-1.065	0
30	Acetyl-CoA carboxylase, isoform A OS=Drosophila melanogaster GN=ACC PE=1 SV=1	13.153	13.1	13.043	13.168	13.268	12.741	13.027	12.834	12.805	12.861	0.816203	-0.293	0.007
32	Terribly reduced optic lobes, isoform BA OS=Drosophila melanogaster GN=trol PE=1 SV=1	3.172	3.897	4.49	3.635	3.831	4.102	3.517	3.957	3.489	3.691	0.963262	-0.054	0.875
34	Uncharacterized protein OS=Drosophila melanogaster GN=CG13492 PE=4 SV=3	11.651	11.708	11.68	11.848	11.793	11.929	12.431	12.117	12.032	12.126	1.3113	0.391	0.007
35	Dynein heavy chain 64C, isoform I OS=Drosophila melanogaster GN=Dhc64C PE=1 SV=1	12.863	12.8	12.754	12.762	12.926	12.764	12.82	12.797	12.86	12.919	1.00765	0.011	0.9
36	Cheerio, isoform M OS=Drosophila melanogaster GN=cher PE=1 SV=1	13.1	13.014	13.145	13.101	13.103	12.977	13.044	13.058	13.255	13.203	1.01045	0.015	0.885
37	Neural conserved at 73EF, isoform I OS=Drosophila melanogaster GN=Nc73EF PE=1 SV=1	9.604	9.93	9.916	9.935	9.963	9.853	9.953	9.969	9.782	9.7	0.987601	-0.018	0.891
38	PDZ and LIM domain protein Zasp OS=Drosophila melanogaster GN=Zasp52 PE=1 SV=2	11.701	11.426	11.191	11.406	11.662	10.763	10.49	10.896	10.868	11.117	0.63728	-0.65	0.003
39	Uncharacterized protein, isoform T OS=Drosophila melanogaster GN=CG34417 PE=1 SV=1	11.114	11.199	11.164	11.114	10.874	11.715	11.694	11.439	11.436	11.363	1.35379	0.437	0.004
40	Arginine kinase, isoform E OS=Drosophila melanogaster GN=Argk PE=1 SV=1	8.15	8.207	8.096	8.265	8.383	7.834	8.133	8.003	8.127	8.097	0.882091	-0.181	0.095
41	Arginine kinase OS=Drosophila melanogaster GN=Argk PE=2 SV=2	7.707	7.823	7.576	8.023	8.273	7.505	7.612	7.695	7.743	7.989	0.888227	-0.171	0.358
42	ATP synthase subunit beta OS=Drosophila melanogaster GN=ATPsynbeta PE=1 SV=1	13.374	13.14	12.912	13.187	13.788	12.003	12.128	12.415	12.485	12.782	0.529242	-0.918	0.003
43	Heat shock protein 83 OS=Drosophila melanogaster GN=Hsp83 PE=1 SV=1	12.928	12.858	12.839	12.842	12.803	12.865	12.929	12.913	12.954	12.949	1.04826	0.068	0.295
44	Karst, isoform E OS=Drosophila melanogaster GN=kst PE=1 SV=2	11.965	12.252	12.111	12.096	12.099	12.123	12.271	12.413	12.34	12.439	1.1591	0.213	0.052
45	Pyruvate carboxylase OS=Drosophila melanogaster GN=PCB PE=1 SV=1	12.769	12.71	12.613	12.723	12.94	12.597	12.894	12.852	12.979	13.092	1.09581	0.132	0.317
46	Neural conserved at 73EF, isoform F OS=Drosophila melanogaster GN=Nc73EF PE=1 SV=1	8.348	8.137	7.862	7.836	8.481	7.487	7.691	7.973	8.165	8.47	0.885154	-0.176	0.518
47	CG9674, isoform F OS=Drosophila melanogaster GN=Dmel\CG9674 PE=1 SV=1	12.318	12.303	12.196	12.214	12.458	12.607	12.781	12.811	12.692	12.818	1.36037	0.444	0.001
48	Papilin OS=Drosophila melanogaster GN=Ppn PE=1 SV=2	11.047	10.892	11.406	10.972	11.079	11.688	12.128	11.909	11.784	11.899	1.74352	0.802	0
49	Protein lava lamp OS=Drosophila melanogaster GN=lva PE=1 SV=2	11.626	11.706	11.643	11.703	11.453	11.539	11.717	11.615	11.565	11.513	0.975355	-0.036	0.709
50	Heat shock 70 kDa protein cognate 5 OS=Drosophila melanogaster GN=Hsc70-5 PE=1 SV=2	12.446	12.296	12.353	12.417	12.317	12.679	12.563	12.716	12.79	12.872	1.28165	0.358	0.002
51	Clathrin heavy chain OS=Drosophila melanogaster GN=Chc PE=1 SV=1	12.443	12.337	12.333	12.37	12.552	12.291	12.47	12.412	12.748	12.719	1.08749	0.121	0.357
52	ATP synthase subunit alpha, mitochondrial OS=Drosophila melanogaster GN=blw PE=1 SV=2	14.336	14.18	13.922	14.125	14.306	13.438	13.336	13.593	13.51	13.744	0.63728	-0.65	0.001
53	Protein 4.1 homolog OS=Drosophila melanogaster GN=cora PE=1 SV=1	12.62	12.51	12.459	12.575	12.605	12.454	12.569	12.54	12.59	12.644	1.00347	0.005	0.956
54	Dumpy, isoform Q OS=Drosophila melanogaster GN=dpy PE=1 SV=1	10.103	10.311	10.503	10.303	10.445	10.315	10.484	10.523	10.562	10.54	1.11034	0.151	0.186
55	Tubulin beta-1 chain OS=Drosophila melanogaster GN=betaTub56D PE=1 SV=2	11.222	11.01	11.094	11.319	11.591	10.447	10.848	10.94	11.431	11.36	0.845572	-0.242	0.343
56	Myosin heavy chain, non-muscle OS=Drosophila melanogaster GN=zip PE=1 SV=2	5.037	4.917	5.431	5.081	4.987	5.728	5.379	4.942	5.207	4.909	1.10343	0.142	0.526
57	Zipper, isoform I OS=Drosophila melanogaster GN=zip PE=1 SV=1	6.34	5.529	6.32	6.013	6.383	6.052	6.281	6.334	6.562	6.243	1.13131	0.178	0.436
58	Fructose-bisphosphate aldolase OS=Drosophila melanogaster GN=Ald PE=1 SV=1	11.248	11.215	11.093	11.144	11.267	10.367	10.169	10.422	10.428	10.44	0.56331	-0.828	0
59	Uncharacterized protein, isoform H OS=Drosophila melanogaster GN=Dmel\CG43078 PE=1 SV=1	10.234	10.353	10.259	10.297	10.317	10.163	10.171	10.234	10.04	10.109	0.901875	-0.149	0.054
60	Fatty acid synthase 2, isoform B OS=Drosophila melanogaster GN=FASN2 PE=1 SV=1	12.64	12.682	12.346	12.458	12.724	11.902	12.075	12.077	12.079	12.265	0.711532	-0.491	0.002
61	Purity of essence, isoform B OS=Drosophila melanogaster GN=poe PE=4 SV=1	12	11.985	12.077	12.088	11.995	11.945	11.804	11.826	11.978	11.788	0.894405	-0.161	0.05
62	Rhea, isoform B OS=Drosophila melanogaster GN=rhea PE=1 SV=1	11.669	11.785	11.777	11.742	11.609	11.988	12.009	12.06	11.988	12.017	1.22774	0.296	0.001
63	Pyruvate kinase OS=Drosophila melanogaster GN=PyK PE=2 SV=2	13.457	13.313	13.144	13.346	13.822	12.484	12.584	12.708	12.76	13.057	0.616426	-0.698	0.003
64	Voltage-dependent anion-selective channel OS=Drosophila melanogaster GN=porin PE=1 SV=3	13.124	13.078	12.743	13.047	13.439	12.517	12.705	13.059	13.163	13.425	0.925304	-0.112	0.661
65	Glyceraldehyde-3-phosphate dehydrogenase 1 OS=Drosophila melanogaster GN=Gapdh1 PE=2 SV=2	10.788	10.74	10.474	10.911	11.118	9.145	9.224	9.121	8.991	9.274	0.317538	-1.655	0
66	Megalin, isoform A OS=Drosophila melanogaster GN=mgl PE=1 SV=2	11.378	11.409	11.42	11.375	11.282	11.134	11.06	10.991	11.014	10.911	0.78404	-0.351	0.001
67	Z band alternatively spliced PDZ-motif protein 52, isoform N OS=Drosophila melanogaster GN=Zasp52 PE=1 SV=1	5.053	4.877	4.541	4.301	5.331	3.751	4.455	5.077	4.625	5.526	0.911301	-0.134	0.772
68	Ankyrin 2, isoform U OS=Drosophila melanogaster GN=Ank2 PE=1 SV=1	11.362	11.583	11.442	11.566	11.545	11.596	11.673	11.773	11.666	11.718	1.13682	0.185	0.039
69	Fatty acid synthase 3 OS=Drosophila melanogaster GN=FASN3 PE=1 SV=3	12.324	12.492	12.042	12.179	12.1	11.769	12.186	12.041	12.006	12.205	0.87904	-0.186	0.209
70	Glyceraldehyde-3-phosphate dehydrogenase 2 OS=Drosophila melanogaster GN=Gapdh2 PE=1 SV=2	10.827	10.672	10.551	10.678	11.022	10.246	10.416	10.347	10.478	10.674	0.802181	-0.318	0.036
71	Fructose-bisphosphate aldolase OS=Drosophila melanogaster GN=Ald PE=1 SV=1	5.098	5.465	5.283	5.693	6.426	4.849	5.664	5.982	7.237	7.183	1.50525	0.59	0.343
72	Uncharacterized protein, isoform G OS=Drosophila melanogaster GN=Dmel\CG43078 PE=1 SV=1	9.018	9.025	8.889	8.885	9.09	8.382	8.53	8.505	8.382	8.523	0.698823	-0.517	0
73	60 kDa heat shock protein, mitochondrial OS=Drosophila melanogaster GN=Hsp60 PE=1 SV=3	11.281	11.066	11.197	11.205	11.314	11.842	11.764	11.929	11.88	11.914	1.57243	0.653	0
74	MIP16230p OS=Drosophila melanogaster GN=Vha68-2 PE=1 SV=1	11.87	11.786	11.708	11.811	12.048	11.643	11.945	12.061	12.104	12.228	1.11034	0.151	0.311
75	Vacuolar protein sorting-associated protein 13 OS=Drosophila melanogaster GN=Vps13 PE=1 SV=2	12.047	12.032	11.999	12.012	12.086	12.092	12.01	12.019	12.197	12.127	1.03814	0.054	0.469
76	Paramyosin, long form OS=Drosophila melanogaster GN=Prm PE=1 SV=1	10.16	11.184	10.914	11.05	10.88	10.986	11.171	11.446	11.543	11.571	1.42011	0.506	0.062
77	ATP-dependent 6-phosphofructokinase OS=Drosophila melanogaster GN=Pfk PE=2 SV=2	12.332	12.017	12	12.265	12.478	11.124	10.992	11.3	11.477	11.584	0.527411	-0.923	0
78	Alpha actinin, isoform G OS=Drosophila melanogaster GN=Actn PE=1 SV=1	4.802	5.019	4.66	4.591	4.597	5.293	5.097	5.263	5.213	5.33	1.42011	0.506	0.001
79	CG8036, isoform B OS=Drosophila melanogaster GN=CG8036 PE=1 SV=3	9.353	9.379	9.193	9.553	9.752	8.45	9.16	8.46	8.66	8.764	0.595841	-0.747	0.003
80	Elongation factor 2 OS=Drosophila melanogaster GN=EF2 PE=1 SV=4	12.609	12.383	12.435	12.555	12.598	12.212	12.287	12.325	12.71	12.642	0.945402	-0.081	0.591
81	Alpha-actinin, sarcomeric OS=Drosophila melanogaster GN=Actn PE=1 SV=2	5.867	5.808	5.755	6.453	5.544	5.899	5.573	5.753	5.646	5.628	0.879649	-0.185	0.365
82	GH11711p OS=Drosophila melanogaster GN=Dmel\CG31872 PE=1 SV=2	10.941	10.987	10.654	10.882	11.955	9.865	10.872	10.834	10.378	11.087	0.718968	-0.476	0.214
83	Heat shock 70 kDa protein cognate 4 OS=Drosophila melanogaster GN=Hsc70-4 PE=1 SV=3	12.633	12.535	12.5	12.624	12.825	12.486	12.676	12.639	12.907	12.935	1.07549	0.105	0.443
84	Neither inactivation nor afterpotential protein C OS=Drosophila melanogaster GN=ninaC PE=1 SV=2	10.272	10.209	10.264	10.213	10.548	9.815	9.905	9.944	9.714	9.893	0.733567	-0.447	0.001
85	Phosphoglycerate kinase OS=Drosophila melanogaster GN=Pgk PE=3 SV=1	13.364	13.134	12.934	13.181	13.55	12.085	12.158	12.259	12.419	12.592	0.524858	-0.93	0
86	CG9485, isoform B OS=Drosophila melanogaster GN=CG9485 PE=1 SV=3	9.299	9.225	9.136	9.073	9.068	8.114	7.571	7.625	7.967	7.743	0.390664	-1.356	0
87	Calcium-transporting ATPase OS=Drosophila melanogaster GN=PMCA PE=1 SV=3	9.124	8.981	8.999	8.952	9.156	8.902	9.103	8.982	8.888	9.109	0.96929	-0.045	0.646
88	CG8036, isoform D OS=Drosophila melanogaster GN=CG8036 PE=1 SV=1	3.802	3.105	3.516	3.947	4.338	3.221	3.185	3.718	4.327	4.8	1.07773	0.108	0.831
89	Laminin subunit alpha OS=Drosophila melanogaster GN=LanA PE=1 SV=2	11.507	11.674	11.677	11.438	11.507	11.861	11.809	11.692	11.618	11.81	1.14631	0.197	0.054
90	Glycerol-3-phosphate dehydrogenase OS=Drosophila melanogaster GN=Gpo-1 PE=1 SV=1	13.291	13.257	13.236	13.386	13.387	11.455	11.128	11.744	11.801	11.855	0.304603	-1.715	0
91	BcDNA.GH08860 OS=Drosophila melanogaster GN=Tps1 PE=1 SV=1	12.587	12.412	12.161	12.312	13.077	11.751	12.266	12.138	12.159	12.342	0.76897	-0.379	0.11
92	Protein disulfide-isomerase OS=Drosophila melanogaster GN=Pdi PE=3 SV=1	12.162	12.168	12.237	12.198	12.094	12.147	12.46	12.321	12.442	12.479	1.14711	0.198	0.054
93	Restin homolog OS=Drosophila melanogaster GN=CLIP-190 PE=1 SV=1	11.762	11.739	11.707	11.655	11.685	11.674	11.734	11.649	11.528	11.521	0.940174	-0.089	0.266
94	Zormin, isoform J OS=Drosophila melanogaster GN=zormin PE=1 SV=1	11.202	11.456	11.069	11.074	10.864	11.484	11.472	11.581	11.579	11.738	1.35472	0.438	0.008
95	AT02348p OS=Drosophila melanogaster GN=UQCR-C2 PE=1 SV=1	12.674	12.367	12.209	12.381	12.791	10.974	11.085	11.251	11.294	11.525	0.418123	-1.258	0
96	Hsc70Cb, isoform A OS=Drosophila melanogaster GN=Hsc70Cb PE=1 SV=1	6.751	6.665	6.895	6.717	6.821	7.063	7.148	6.707	6.797	6.768	1.09202	0.127	0.324
97	Succinate dehydrogenase [ubiquinone] flavoprotein subunit, mitochondrial OS=Drosophila melanogaster GN=SdhA PE=2 SV=3	12.59	12.45	12.264	12.403	12.849	11.472	11.37	11.724	11.701	11.875	0.542239	-0.883	0
98	Transitional endoplasmic reticulum ATPase TER94 OS=Drosophila melanogaster GN=TER94 PE=1 SV=1	7.771	7.687	7.723	8.11	8.26	6.115	6.962	6.247	6.669	6.925	0.398596	-1.327	0
99	CG9485, isoform C OS=Drosophila melanogaster GN=CG9485 PE=1 SV=1	6.46	6.279	6.347	6.283	6.64	6.017	6.785	5.633	6.099	6.37	0.857971	-0.221	0.383
100	Eukaryotic translation initiation factor 4G, isoform B OS=Drosophila melanogaster GN=eIF4G1 PE=1 SV=1	11.793	11.78	11.729	11.75	11.591	11.748	11.825	11.728	11.868	11.791	1.04464	0.063	0.42
101	Glycerol-3-phosphate dehydrogenase [NAD(+)] OS=Drosophila melanogaster GN=Gpdh PE=1 SV=1	13.64	13.297	13.15	13.33	13.822	12.393	12.466	12.765	12.699	12.87	0.570777	-0.809	0.001
102	Nucleoporin 358kD, isoform B OS=Drosophila melanogaster GN=Nup358 PE=1 SV=1	11.367	11.35	11.372	11.372	11.397	11.506	11.481	11.407	11.39	11.362	1.04102	0.058	0.386
103	NADH dehydrogenase (Ubiquinone) 75 kDa subunit, isoform B OS=Drosophila melanogaster GN=ND-75 PE=1 SV=1	12.964	12.781	12.706	12.821	13.16	11.344	11.408	11.599	11.813	11.768	0.406126	-1.3	0
104	Limpet, isoform K OS=Drosophila melanogaster GN=Lmpt PE=1 SV=2	10.88	10.739	10.711	10.794	10.589	10.162	9.98	9.934	9.897	10.109	0.604578	-0.726	0
105	Calcium-transporting ATPase OS=Drosophila melanogaster GN=PMCA PE=1 SV=5	6.325	6.235	6.181	6.263	6.447	5.998	5.997	5.853	5.915	6.075	0.79996	-0.322	0.004
106	Calcium-transporting ATPase OS=Drosophila melanogaster GN=PMCA PE=1 SV=1	3.58	3.516	3.411	3.647	3.882	1.669	1.235	2.67	2.841	2.818	0.389582	-1.36	0.006
107	Enolase OS=Drosophila melanogaster GN=Eno PE=1 SV=2	12.772	12.701	12.493	12.664	12.923	11.966	11.933	12.158	12.173	12.337	0.661127	-0.597	0.001
108	GH01077p OS=Drosophila melanogaster GN=UQCR-C1 PE=1 SV=2	12.803	12.327	12.11	12.336	13.213	10.895	11.066	11.357	11.736	12.121	0.459138	-1.123	0.008
109	Calcium-transporting ATPase OS=Drosophila melanogaster GN=PMCA PE=1 SV=3	4.126	4.165	4.276	4.261	4.795	3.084	3.646	2.568	3.437	3.252	0.457867	-1.127	0.001
110	ATP-citrate synthase OS=Drosophila melanogaster GN=ATPCL PE=1 SV=1	5.602	5.756	5.411	5.635	5.413	5.373	5.688	5.456	5.72	5.031	0.926588	-0.11	0.554
111	TER94, isoform E OS=Drosophila melanogaster GN=TER94 PE=1 SV=1	7.324	7.156	7.258	7.638	7.917	4.762	6.208	5.209	5.931	5.855	0.274333	-1.866	0
112	ATP-citrate synthase OS=Drosophila melanogaster GN=ATPCL PE=1 SV=1	5.962	5.555	6.078	5.766	5.805	5.731	6.007	5.924	5.664	5.369	0.936921	-0.094	0.618
113	Transferrin OS=Drosophila melanogaster GN=Tsf1 PE=1 SV=1	11.639	11.317	12.31	11.892	11.681	11.921	12.663	12.191	12.474	12.516	1.50004	0.585	0.035
114	Hsc70Cb, isoform G OS=Drosophila melanogaster GN=Hsc70Cb PE=1 SV=1	6.562	6.681	6.675	6.483	6.404	6.579	6.347	6.629	6.407	6.381	0.938221	-0.092	0.406
115	ATP-citrate synthase OS=Drosophila melanogaster GN=ATPCL PE=1 SV=1	4.757	4.696	4.596	4.875	5.136	5.088	5.279	5.082	5	4.706	1.16393	0.219	0.195
116	CG7920, isoform A OS=Drosophila melanogaster GN=CG7920 PE=1 SV=1	12.424	12.286	12.072	12.29	12.905	11.447	11.764	11.869	11.857	12.102	0.665265	-0.588	0.016
117	Pyruvate dehydrogenase E1 component subunit alpha OS=Drosophila melanogaster GN=l(1)G0334 PE=1 SV=1	12.453	12.161	11.894	12.114	12.723	11.098	11.251	11.644	11.827	12.067	0.618995	-0.692	0.025
118	Kinesin heavy chain OS=Drosophila melanogaster GN=Khc PE=1 SV=2	11.787	11.76	11.746	11.768	11.75	11.765	11.815	11.721	11.805	11.747	1.00556	0.008	0.904
119	1,4-Alpha-Glucan branching enzyme OS=Drosophila melanogaster GN=AGBE PE=1 SV=1	12.62	12.542	12.305	12.478	12.817	11.586	11.963	11.891	11.869	11.943	0.614719	-0.702	0
120	Delta-1-pyrroline-5-carboxylate synthase OS=Drosophila melanogaster GN=Dmel\CG7470 PE=1 SV=1	12.121	12.078	11.875	11.859	12.301	12.119	12.526	12.342	12.494	12.711	1.3113	0.391	0.028
121	Lethal (2) 01289, isoform F OS=Drosophila melanogaster GN=l(2)01289 PE=1 SV=1	11.354	11.326	11.299	11.391	11.509	11.221	11.283	11.251	11.066	11.322	0.903127	-0.147	0.106
122	Probable citrate synthase, mitochondrial OS=Drosophila melanogaster GN=kdn PE=2 SV=1	13.13	12.773	12.685	12.753	13.106	11.884	11.707	12.258	12.171	12.419	0.573554	-0.802	0.002
123	Tubulin beta-2 chain OS=Drosophila melanogaster GN=betaTub85D PE=1 SV=1	10.162	9.903	10.086	10.315	10.594	9.45	9.565	9.962	10.579	10.225	0.837406	-0.256	0.386
124	Laminin subunit gamma-1 OS=Drosophila melanogaster GN=LanB2 PE=2 SV=2	11.055	11.227	11.187	10.971	11.094	11.28	11.315	11.254	11.236	11.477	1.15269	0.205	0.041
125	LD20211p OS=Drosophila melanogaster GN=Tudor-SN PE=1 SV=1	11.486	11.392	11.418	11.522	11.537	11.272	11.444	11.457	11.834	11.662	1.04464	0.063	0.658
126	LD07162p OS=Drosophila melanogaster GN=vig PE=1 SV=1	11.038	11.14	11.213	11.289	10.856	11.483	11.374	11.15	11.264	11.053	1.11574	0.158	0.265
127	LD30155p OS=Drosophila melanogaster GN=lost PE=1 SV=1	11.453	11.299	11.332	11.313	11.399	11.614	11.651	11.595	11.661	11.573	1.19748	0.26	0.003
128	Dodeca-satellite-binding protein 1, isoform A OS=Drosophila melanogaster GN=Dp1 PE=1 SV=1	12.108	12.122	12.23	12.204	11.914	12.192	12.342	12.029	12.132	12.052	1.02385	0.034	0.782
129	LD13601p OS=Drosophila melanogaster GN=UGP PE=1 SV=2	12.206	12.281	12.075	12.238	12.615	12.038	12.337	12.202	12.036	12.213	0.921464	-0.118	0.406
130	Eukaryotic translation initiation factor 3 subunit A OS=Drosophila melanogaster GN=eIF3-S10 PE=1 SV=1	11.591	11.579	11.613	11.639	11.383	11.663	11.63	11.547	11.684	11.559	1.03958	0.056	0.525
131	Limpet, isoform J OS=Drosophila melanogaster GN=Lmpt PE=1 SV=1	6.416	6.596	6.397	6.581	6.528	6.408	6.652	6.523	6.527	6.643	1.03311	0.047	0.631
132	Protein clueless OS=Drosophila melanogaster GN=clu PE=1 SV=1	11.54	11.622	11.648	11.805	11.279	11.9	11.601	11.572	11.887	11.643	1.10343	0.142	0.334
133	Bicoid stability factor OS=Drosophila melanogaster GN=bsf PE=1 SV=2	11.847	11.769	11.895	12.011	11.487	12.074	11.751	11.936	12.107	11.903	1.11111	0.152	0.286
134	Alcohol dehydrogenase OS=Drosophila melanogaster GN=Adh PE=1 SV=2	12.971	13.131	12.866	13.249	13.513	12.481	13.073	12.767	12.63	13.038	0.785673	-0.348	0.092
135	Vinculin, isoform B OS=Drosophila melanogaster GN=Vinc PE=1 SV=1	11.431	11.434	11.399	11.434	11.371	11.443	11.378	11.351	11.464	11.445	1.00139	0.002	0.977
136	Megator, isoform B OS=Drosophila melanogaster GN=Mtor PE=1 SV=1	11.143	11.187	11.165	11.131	10.992	11.335	11.289	11.18	11.18	11.091	1.06511	0.091	0.297
137	Cytochrome P450 4g1 OS=Drosophila melanogaster GN=Cyp4g1 PE=2 SV=1	12.554	12.729	12.465	12.498	12.439	12.038	12.262	12.246	12.076	12.262	0.779165	-0.36	0.004
138	Heat shock 70-kDa protein cognate 3, isoform E OS=Drosophila melanogaster GN=Hsc70-3 PE=1 SV=1	11.481	11.492	11.478	11.446	11.35	11.422	11.667	11.546	11.701	11.707	1.11651	0.159	0.093
139	CG7461, isoform B OS=Drosophila melanogaster GN=CG7461 PE=1 SV=2	11.775	11.622	11.373	11.535	11.96	11.538	11.725	11.879	12.016	12.11	1.14949	0.201	0.271
140	Contactin OS=Drosophila melanogaster GN=Cont PE=1 SV=2	11.247	11.074	11.131	11.146	11.101	11.205	11.15	11.193	11.328	11.247	1.06069	0.085	0.267
141	Vacuolar H[+] ATPase 68kD subunit 1, isoform B OS=Drosophila melanogaster GN=Vha68-1 PE=1 SV=1	10.48	10.294	10.211	10.261	10.765	9.953	10.065	10.16	10.197	10.401	0.842647	-0.247	0.131
142	60 kDa heat shock protein homolog 2, mitochondrial OS=Drosophila melanogaster GN=Hsp60C PE=2 SV=2	11.251	11.164	11.393	11.398	11.17	10.764	10.52	10.801	11.076	10.602	0.695923	-0.523	0.003
143	Chaoptin, isoform D OS=Drosophila melanogaster GN=chp PE=1 SV=1	11.785	11.702	11.629	11.658	12.067	11.514	11.546	11.551	11.694	11.733	0.895025	-0.16	0.195
144	FI21215p1 OS=Drosophila melanogaster GN=ninaC PE=2 SV=1	8.506	8.532	8.4	8.374	8.508	7.59	7.968	7.995	7.613	8.035	0.648869	-0.624	0.001
145	CG5028, isoform A OS=Drosophila melanogaster GN=CG5028 PE=1 SV=1	12.493	12.326	12.156	12.24	12.687	11.397	11.215	11.498	11.494	11.699	0.528509	-0.92	0
146	Coatomer subunit alpha OS=Drosophila melanogaster GN=alphaCOP PE=1 SV=1	11.54	11.497	11.443	11.518	11.425	11.451	11.469	11.456	11.707	11.635	1.04174	0.059	0.521
147	Mitochondrial trifunctional protein alpha subunit, isoform B OS=Drosophila melanogaster GN=Mtpalpha PE=1 SV=1	7.624	7.557	7.549	7.502	7.477	7.411	7.568	7.122	7.267	7.274	0.862144	-0.214	0.064
148	RE29555p OS=Drosophila melanogaster GN=CG11089 PE=1 SV=1	11.428	11.322	11.466	11.48	11.469	12.047	12.542	12.024	12.66	12.432	1.87644	0.908	0
149	Neuroglian, isoform G OS=Drosophila melanogaster GN=Nrg PE=1 SV=1	11.612	11.502	11.486	11.58	11.607	11.451	11.51	11.537	11.599	11.654	0.99516	-0.007	0.938
150	BcDNA.GH12558 OS=Drosophila melanogaster GN=Mtpalpha PE=1 SV=1	1.602	0.995	1.143	1.532	1.457	1.971	2.863	1.645	1.157	2.639	1.63467	0.709	0.09
151	Catalase OS=Drosophila melanogaster GN=Cat PE=1 SV=2	11.725	11.919	11.708	11.953	11.976	11.634	12.02	11.802	11.75	11.87	0.971981	-0.041	0.748
152	Glycoprotein 93 OS=Drosophila melanogaster GN=Gp93 PE=1 SV=1	12.008	11.97	11.959	11.931	11.726	11.961	12.192	12.109	12.149	12.122	1.13918	0.188	0.058
153	Aconitate hydratase OS=Drosophila melanogaster GN=Irp-1B PE=1 SV=1	11.53	11.514	11.49	11.579	11.64	11.574	11.902	11.687	11.78	11.899	1.16312	0.218	0.04
154	Axotactin, isoform C OS=Drosophila melanogaster GN=axo PE=4 SV=1	11.236	11.257	11.108	11.26	11.29	11.626	11.581	11.551	11.586	11.619	1.28521	0.362	0
155	Actin, indirect flight muscle OS=Drosophila melanogaster GN=Act88F PE=1 SV=1	9.83	9.501	9.842	9.733	10.029	9.521	9.302	9.91	9.526	9.607	0.862741	-0.213	0.204
156	Fasciclin 1, isoform C OS=Drosophila melanogaster GN=Fas1 PE=1 SV=1	6.796	6.647	6.599	6.584	6.788	6.78	6.527	6.905	6.962	7.063	1.12117	0.165	0.23
157	Glutamate dehydrogenase, mitochondrial OS=Drosophila melanogaster GN=Gdh PE=1 SV=2	10.111	10.048	9.957	10.075	10.588	9.747	9.847	9.917	9.829	9.913	0.809442	-0.305	0.052
158	CG1648, isoform B OS=Drosophila melanogaster GN=CG1648 PE=1 SV=1	12.522	12.343	11.639	11.809	13.292	11.409	11.735	12.198	11.632	12.015	0.695923	-0.523	0.186
159	GH24511p OS=Drosophila melanogaster GN=Uba1 PE=1 SV=1	11.412	11.283	11.225	11.307	11.511	11.089	11.182	11.24	11.66	11.526	0.99447	-0.008	0.967
160	Actin, larval muscle OS=Drosophila melanogaster GN=Act79B PE=1 SV=2	9.201	9.606	9.69	9.504	9.647	9.455	9.685	9.883	9.509	9.813	1.10191	0.14	0.374
161	Apolipoprotein lipid transfer particle OS=Drosophila melanogaster GN=Apoltp PE=1 SV=2	11.311	11.282	11.327	11.2	11.135	11.345	11.38	11.219	11.214	11.284	1.02598	0.037	0.667
162	Alpha-mannosidase OS=Drosophila melanogaster GN=LManVI PE=1 SV=2	9.821	10.062	9.819	10.188	10.823	8.906	10.27	10.27	9.95	10.535	0.89751	-0.156	0.726
163	Alpha-mannosidase OS=Drosophila melanogaster GN=LManV PE=1 SV=1	10.546	10.909	10.768	11.103	11.361	10.109	11.296	11.113	10.661	11.111	0.946714	-0.079	0.82
164	Tubulin alpha-1 chain OS=Drosophila melanogaster GN=alphaTub84B PE=1 SV=1	10.983	10.34	10.557	10.735	11.659	9.929	10.555	10.82	10.638	10.624	0.789494	-0.341	0.308
165	Phosphoribosylformylglycinamidine synthase OS=Drosophila melanogaster GN=ade2 PE=2 SV=2	11.503	11.499	11.638	11.658	11.794	11.711	12.121	11.708	12.083	11.902	1.21926	0.286	0.048
166	CG9297, isoform A OS=Drosophila melanogaster GN=CG9297-RA PE=1 SV=1	11.854	11.764	11.475	11.664	12.287	11.514	11.979	11.896	12.007	12.26	1.08824	0.122	0.603
167	Uncharacterized protein OS=Drosophila melanogaster GN=CG30069 PE=1 SV=1	10.597	10.688	10.602	10.609	10.488	10.47	10.604	10.574	10.533	10.563	0.967276	-0.048	0.523
168	Tripeptidyl-peptidase 2 OS=Drosophila melanogaster GN=TppII PE=1 SV=2	11.571	11.555	11.545	11.63	11.644	11.564	11.622	11.589	11.789	11.72	1.04826	0.068	0.4
169	Vesicle-fusing ATPase 1 OS=Drosophila melanogaster GN=comt PE=2 SV=1	10.929	10.906	10.78	10.738	10.926	10.697	10.649	10.804	10.8	10.859	0.936921	-0.094	0.284
170	CG2918, isoform A OS=Drosophila melanogaster GN=EG:25E8.1 PE=1 SV=1	11.383	11.457	11.389	11.464	11.283	11.117	11.334	11.227	11.308	11.254	0.903127	-0.147	0.083
171	NAT1, isoform D OS=Drosophila melanogaster GN=NAT1 PE=1 SV=1	10.313	10.235	10.3	10.26	10.091	10.369	10.302	10.34	10.047	10.06	0.988971	-0.016	0.901
172	Aldehyde dehydrogenase OS=Drosophila melanogaster GN=Aldh PE=1 SV=1	11.613	11.379	11.321	11.5	11.911	10.967	11.356	11.337	11.212	11.491	0.828171	-0.272	0.123
173	Fasciclin 1, isoform D OS=Drosophila melanogaster GN=Fas1 PE=1 SV=1	6.221	6.281	6.045	5.824	6.262	6.244	6.469	6.505	6.237	6.33	1.17283	0.23	0.098
174	Paramyosin, short form OS=Drosophila melanogaster GN=Prm PE=2 SV=2	5.457	5.848	5.593	5.607	5.808	5.213	5.618	5.738	5.931	5.668	0.980099	-0.029	0.886
175	NADPH--cytochrome P450 reductase OS=Drosophila melanogaster GN=Cpr PE=2 SV=2	7.396	7.31	7.183	7.248	7.127	7.428	7.368	7.448	7.587	7.81	1.20999	0.275	0.038
176	Phosphoglucomutase OS=Drosophila melanogaster GN=Pgm PE=1 SV=1	12.217	12.082	11.884	12.015	12.412	11.328	11.609	11.521	11.572	11.619	0.663423	-0.592	0.001
177	Peroxisomal multifunctional enzyme type 2 OS=Drosophila melanogaster GN=Mfe2 PE=1 SV=1	11.909	11.832	11.734	11.76	11.744	11.754	11.842	11.782	11.822	11.87	1.01255	0.018	0.825
178	Bifunctional glutamate/proline--tRNA ligase OS=Drosophila melanogaster GN=GluProRS PE=1 SV=2	11.187	11.215	11.154	11.243	11.067	12.1	11.802	11.614	11.922	11.74	1.58337	0.663	0
179	Tubulin beta chain OS=Drosophila melanogaster GN=betaTub97EF PE=1 SV=1	10.763	10.557	10.515	10.551	10.829	10.096	10.31	10.416	10.627	10.711	0.863938	-0.211	0.2
180	LP18708p OS=Drosophila melanogaster GN=nocte PE=1 SV=4	9.619	9.621	9.711	9.663	9.352	9.793	9.679	9.711	9.453	9.48	1.02101	0.03	0.83
181	Isocitrate dehydrogenase [NADP] OS=Drosophila melanogaster GN=Idh PE=1 SV=2	11.826	11.854	11.887	11.911	11.802	12.103	12.427	12.317	12.447	12.532	1.42306	0.509	0.001
182	Stress-sensitive B, isoform E OS=Drosophila melanogaster GN=sesB PE=1 SV=1	13.043	13.097	12.776	13.135	13.11	11.825	11.889	12.09	11.961	12.18	0.485317	-1.043	0
183	Larval serum protein 2, isoform B OS=Drosophila melanogaster GN=Lsp2 PE=4 SV=1	9.559	9.774	11.316	11.03	9.335	12.44	12.615	12.482	13.148	12.862	5.68437	2.507	0
184	Fasciclin-1 OS=Drosophila melanogaster GN=Fas1 PE=1 SV=1	5.554	5.571	5.566	5.512	5.463	5.513	5.673	5.645	5.372	5.343	0.983502	-0.024	0.835
185	Actin-42A OS=Drosophila melanogaster GN=Act42A PE=1 SV=3	9.902	9.961	10.097	9.965	9.809	10.048	10.263	10.602	10.37	10.349	1.30134	0.38	0.013
186	Dipeptidyl peptidase 3 OS=Drosophila melanogaster GN=DppIII PE=2 SV=2	11.575	11.474	11.44	11.521	11.655	11.41	11.459	11.509	11.699	11.669	1.01115	0.016	0.889
187	Aldehyde oxidase 3, isoform A OS=Drosophila melanogaster GN=AOX3 PE=1 SV=1	11.773	11.761	11.588	11.703	11.801	11.541	11.751	11.774	11.619	11.671	0.963262	-0.054	0.558
188	C-1-tetrahydrofolate synthase, cytoplasmic OS=Drosophila melanogaster GN=pug PE=2 SV=4	11.344	11.281	11.464	11.658	11.974	11.307	11.989	11.424	11.864	11.92	1.11497	0.157	0.511
189	Glutamate dehydrogenase OS=Drosophila melanogaster GN=Gdh PE=1 SV=1	9.74	9.938	9.845	9.979	10.019	9.962	10.264	9.987	10.134	10.068	1.1321	0.179	0.098
190	Dihydrolipoyl dehydrogenase OS=Drosophila melanogaster GN=Dmel\CG7430 PE=1 SV=1	11.803	11.688	11.587	11.729	12.094	11.113	11.13	11.304	11.149	11.399	0.677832	-0.561	0.001
191	GH06739p OS=Drosophila melanogaster GN=tn PE=1 SV=1	9.416	9.819	9.632	9.743	9.44	10.095	9.843	9.94	10.042	10.031	1.30134	0.38	0.008
192	Uncharacterized protein, isoform C OS=Drosophila melanogaster GN=CG30122 PE=1 SV=1	11.028	10.884	10.978	10.95	10.803	10.911	10.803	10.897	10.886	10.772	0.949342	-0.075	0.358
193	Ferritin OS=Drosophila melanogaster GN=Fer2LCH PE=1 SV=1	11.379	11.494	11.416	11.616	11.732	12.505	12.822	12.803	12.856	12.986	2.40661	1.267	0
194	Uncharacterized protein OS=Drosophila melanogaster GN=anon-SAGE:Wang-018 PE=1 SV=1	11.117	11.157	10.512	10.824	11.51	10.812	11.582	11.791	11.005	11.924	1.31859	0.399	0.239
195	Uncharacterized protein, isoform A OS=Drosophila melanogaster GN=CG44245 PE=1 SV=3	10.929	10.862	10.677	10.769	11.05	11.026	11.282	11.115	11.104	11.099	1.20414	0.268	0.024
196	Aldehyde oxidase 1 OS=Drosophila melanogaster GN=AOX1 PE=1 SV=1	11.039	11.158	10.958	11.077	11.364	11.517	12.09	11.814	11.741	11.866	1.60882	0.686	0.001
197	Phosrestin-1 OS=Drosophila melanogaster GN=Arr2 PE=1 SV=2	11.682	11.528	11.487	11.432	11.824	11.088	11.091	11.347	11.365	11.468	0.801625	-0.319	0.032
198	Proline dehydrogenase OS=Drosophila melanogaster GN=slgA PE=1 SV=1	6.014	5.502	4.982	5.508	7.202	5.434	5.855	6.922	8.747	8.735	2.45717	1.297	0.177
199	Uninflatable, isoform C OS=Drosophila melanogaster GN=uif PE=1 SV=1	10.837	10.715	10.867	10.865	10.54	11.036	10.619	10.69	11.032	10.684	1.03383	0.048	0.763
200	Disks large 1 tumor suppressor protein OS=Drosophila melanogaster GN=dlg1 PE=1 SV=2	5.268	5.359	5.359	5.324	5.225	5.102	5.255	5.226	4.957	4.846	0.852635	-0.23	0.055
201	Probable isocitrate dehydrogenase [NAD] subunit alpha, mitochondrial OS=Drosophila melanogaster GN=l(1)G0156 PE=2 SV=1	12.074	11.897	11.703	11.865	12.255	10.743	10.81	11.122	11.165	11.404	0.532185	-0.91	0.001
202	CG6439, isoform A OS=Drosophila melanogaster GN=CG6439 PE=1 SV=1	12.416	12.398	12.304	12.33	12.457	11.464	11.306	11.564	11.47	11.486	0.527411	-0.923	0
203	Glucose-6-phosphate isomerase OS=Drosophila melanogaster GN=Pgi PE=2 SV=2	11.878	11.872	11.797	11.947	12.058	11.199	11.105	11.327	11.382	11.466	0.65293	-0.615	0
204	Rabconnectin-3A OS=Drosophila melanogaster GN=Rbcn-3A PE=1 SV=3	10.887	10.856	10.789	10.868	10.969	10.853	10.849	10.825	10.926	10.926	1.00139	0.002	0.984
205	Cytochrome P450 reductase, isoform B OS=Drosophila melanogaster GN=Cpr PE=1 SV=1	4.344	4.587	3.959	3.957	4.423	6.012	6.317	6.704	7.321	7.509	5.73185	2.519	0
206	Fmr1, isoform G OS=Drosophila melanogaster GN=Fmr1 PE=1 SV=1	5.911	6.534	6.396	6.178	6.101	6.399	6.196	6.277	5.949	5.768	0.929161	-0.106	0.609
207	Hsp70/Hsp90 organizing protein OS=Drosophila melanogaster GN=Hop PE=1 SV=1	11.857	11.768	11.788	11.791	11.76	11.763	11.71	11.734	11.821	11.626	0.957935	-0.062	0.39
208	Dystrophin, isoforms A/C/F/G/H OS=Drosophila melanogaster GN=Dys PE=1 SV=3	10.141	10.142	10.135	10.124	10.15	10.247	10.172	10.136	10.05	10.112	1.00347	0.005	0.956
209	Ankyrin, isoform B OS=Drosophila melanogaster GN=Ank PE=1 SV=1	11.281	11.188	11.053	11.173	11.293	10.865	10.921	11.02	11.114	11.122	0.877214	-0.189	0.065
210	Proline dehydrogenase OS=Drosophila melanogaster GN=slgA PE=1 SV=1	6.578	6.397	6.606	6.934	7.205	3.029	3.776	2.515	3.28	3.618	0.0883271	-3.501	0
211	Bruchpilot, isoform J OS=Drosophila melanogaster GN=brp PE=1 SV=1	10.198	10.774	10.559	10.719	10.714	10.565	10.532	10.829	10.717	10.604	1.03958	0.056	0.732
212	Actin-57B OS=Drosophila melanogaster GN=Act57B PE=1 SV=1	7.481	7.973	8.135	7.999	8.398	7.716	7.744	8.286	8.067	8.244	1.00975	0.014	0.962
213	CG1910, isoform A OS=Drosophila melanogaster GN=CG1910 PE=1 SV=1	5.289	4.902	5.023	5.039	5.059	4.952	5.247	5.068	4.514	5.137	0.946714	-0.079	0.677
214	LD23292p OS=Drosophila melanogaster GN=Mcr PE=1 SV=1	10.844	10.721	10.709	10.702	10.757	10.797	10.729	10.893	10.977	10.91	1.08298	0.115	0.172
215	CG1910, isoform D OS=Drosophila melanogaster GN=CG1910 PE=1 SV=1	4.619	4.907	5.075	4.838	4.696	5.176	5.115	4.334	4.957	4.751	1.0274	0.039	0.873
216	Mitochondrial proton/calcium exchanger protein OS=Drosophila melanogaster GN=Letm1 PE=2 SV=2	11.273	11.231	11.278	11.322	11.284	11.3	11.362	11.358	11.322	11.424	1.05409	0.076	0.244
217	GH04080p OS=Drosophila melanogaster GN=PPO1 PE=1 SV=1	10.885	10.655	10.707	10.768	10.961	10.544	10.927	11.17	11.187	11.399	1.18921	0.25	0.206
218	Protein ROP OS=Drosophila melanogaster GN=Rop PE=2 SV=2	11.393	11.224	11.17	11.131	11.487	11.062	11.119	11.189	11.298	11.246	0.934327	-0.098	0.383
219	Lamin Dm0 OS=Drosophila melanogaster GN=Lam PE=1 SV=4	10.554	11.029	10.776	10.656	10.426	10.397	10.409	10.677	10.678	10.731	0.926588	-0.11	0.507
220	ATP synthase subunit gamma, mitochondrial OS=Drosophila melanogaster GN=ATPsyngamma PE=2 SV=2	12.949	12.951	12.684	12.866	12.967	12.178	12.007	12.35	12.271	12.381	0.63905	-0.646	0
221	CG1674, isoform E OS=Drosophila melanogaster GN=Dmel\CG1674 PE=1 SV=2	7.535	7.701	7.629	7.642	7.569	7.156	7.271	7.553	7.305	7.487	0.834509	-0.261	0.028
222	14-3-3 protein epsilon OS=Drosophila melanogaster GN=14-3-3epsilon PE=1 SV=2	12.022	11.881	11.888	11.883	12.01	11.733	11.79	11.772	11.767	11.852	0.898755	-0.154	0.045
223	IP09655p OS=Drosophila melanogaster GN=Mdh2 PE=1 SV=1	12.233	12.208	12.038	12.156	12.267	11.25	11.247	11.474	11.447	11.634	0.586417	-0.77	0
224	Belle, isoform B OS=Drosophila melanogaster GN=bel PE=4 SV=1	10.508	10.536	10.453	10.54	10.371	10.357	10.238	10.368	10.062	9.989	0.824162	-0.279	0.026
225	Laminin subunit beta-1 OS=Drosophila melanogaster GN=LanB1 PE=1 SV=4	10.478	10.536	10.541	10.359	10.518	10.617	10.74	10.551	10.586	10.856	1.13603	0.184	0.069
226	Golgin-245 ortholog OS=Drosophila melanogaster GN=Golgin245 PE=1 SV=2	10.177	10.101	10.173	10.134	10.101	10.143	10.204	10.015	10.153	10.118	0.992404	-0.011	0.893
227	Aluminum tubes, isoform G OS=Drosophila melanogaster GN=alt PE=1 SV=1	11.128	11.261	11.369	11.356	11.021	11.381	11.445	11.322	11.33	11.125	1.06733	0.094	0.435
228	MICOS complex subunit MIC60 OS=Drosophila melanogaster GN=Mitofilin PE=3 SV=1	12.249	12.188	12.128	12.163	12.297	11.599	11.538	11.864	11.749	11.876	0.716978	-0.48	0.001
229	Regulatory particle non-ATPase 2, isoform B OS=Drosophila melanogaster GN=Rpn2 PE=4 SV=1	11.125	11.118	11.112	11.176	11.186	11.003	11.165	11.097	11.181	11.146	0.982821	-0.025	0.747
230	Shibire, isoform L OS=Drosophila melanogaster GN=shi PE=1 SV=1	8.428	8.504	8.392	8.519	8.391	8.656	8.459	8.597	8.238	8.46	1.02456	0.035	0.764
231	Aminopeptidase OS=Drosophila melanogaster GN=Psa PE=1 SV=1	11.443	11.442	11.425	11.471	11.458	11.112	11.14	11.185	11.27	11.149	0.825305	-0.277	0.001
232	CG1674, isoform L OS=Drosophila melanogaster GN=Dmel\CG1674 PE=1 SV=1	9.152	9.237	9.022	9.058	8.782	8.502	8.07	8.374	8.297	8.459	0.61132	-0.71	0
233	Phosphoglycerate mutase OS=Drosophila melanogaster GN=Pglym78 PE=1 SV=2	11.586	11.382	11.363	11.612	11.996	9.965	10.052	10.34	10.57	10.792	0.4222	-1.244	0
234	Optic atrophy 1 ortholog, isoform A OS=Drosophila melanogaster GN=Opa1 PE=1 SV=1	11.494	11.441	11.47	11.459	11.566	11.433	11.31	11.434	11.433	11.452	0.95	-0.074	0.295
235	Delta-1-Pyrroline-5-carboxylate dehydrogenase 1, isoform A OS=Drosophila melanogaster GN=P5CDh1 PE=1 SV=1	11.59	11.536	11.557	11.537	11.673	11.488	11.48	11.653	11.655	11.766	1.02101	0.03	0.766
236	205 kDa microtubule-associated protein OS=Drosophila melanogaster GN=Map205 PE=1 SV=2	11.085	10.861	11.082	10.955	10.956	10.882	10.996	10.843	10.769	10.885	0.924663	-0.113	0.205
237	FI21274p1 OS=Drosophila melanogaster GN=Trap1 PE=1 SV=1	11.062	10.967	11.098	11.133	10.956	10.856	10.642	10.92	11.056	10.974	0.898755	-0.154	0.167
238	Multifunctional protein ADE2 OS=Drosophila melanogaster GN=ade5 PE=2 SV=2	11.499	11.28	11.475	11.363	11.574	11.612	11.959	11.555	11.842	11.753	1.23628	0.306	0.023
239	Protein bangles and beads OS=Drosophila melanogaster GN=bnb PE=1 SV=1	11.468	11.465	11.563	11.569	11.394	11.942	11.97	11.81	11.704	11.72	1.26313	0.337	0.004
240	Dihydropyrimidine dehydrogenase [NADP(+)] OS=Drosophila melanogaster GN=su(r) PE=1 SV=2	10.904	10.848	10.939	11.056	11.092	10.96	11.323	10.877	11.331	11.188	1.1235	0.168	0.224
241	Uncharacterized protein, isoform C OS=Drosophila melanogaster GN=CG34417 PE=1 SV=1	4.149	4.231	4.214	4.245	4.309	4.543	4.712	4.431	4.111	4.346	1.1479	0.199	0.151
242	AT21416p OS=Drosophila melanogaster GN=Past1 PE=1 SV=1	11.865	11.821	11.794	11.843	12.032	11.894	12.066	12.026	12.087	12.235	1.14155	0.191	0.067
243	Golgi microtubule-associated protein, isoform A OS=Drosophila melanogaster GN=Gmap PE=1 SV=2	9.902	9.893	9.868	9.913	9.753	9.964	10.025	9.91	9.871	9.884	1.04608	0.065	0.392
244	Cubilin homolog OS=Drosophila melanogaster GN=Cubn PE=2 SV=3	9.701	9.819	9.897	9.848	9.702	10.488	10.691	10.597	10.534	10.538	1.71238	0.776	0
245	Amphiphysin OS=Drosophila melanogaster GN=Amph PE=1 SV=1	8.23	8.31	8.291	8.318	8.198	8.609	8.68	8.544	8.246	8.4	1.1704	0.227	0.055
246	Polyadenylate-binding protein OS=Drosophila melanogaster GN=pAbp PE=1 SV=3	11.248	11.1	11.098	11.33	11.537	10.769	10.859	10.91	11.231	11.134	0.82245	-0.282	0.076
247	Alanine--tRNA ligase, cytoplasmic OS=Drosophila melanogaster GN=Aats-ala PE=2 SV=1	11.162	11.145	11.21	11.233	11.091	11.171	11.202	11.255	11.398	11.219	1.05775	0.081	0.314
248	Z band alternatively spliced PDZ-motif protein 52, isoform T OS=Drosophila melanogaster GN=Zasp52 PE=1 SV=1	5.07	5.302	5.175	5.281	5.064	6.165	6.075	6.305	5.782	6.007	1.85061	0.888	0
249	Probable methylmalonate-semialdehyde dehydrogenase [acylating], mitochondrial OS=Drosophila melanogaster GN=CG17896 PE=2 SV=1	11.192	11.171	11.243	11.481	11.676	11.21	11.773	11.476	11.929	11.996	1.2518	0.324	0.144
250	Valyl-tRNA synthetase, isoform C OS=Drosophila melanogaster GN=ValRS PE=1 SV=1	11.514	11.439	11.459	11.495	11.552	11.359	11.381	11.396	11.636	11.544	0.980099	-0.029	0.765
251	Reticulon-like protein OS=Drosophila melanogaster GN=Rtnl1 PE=1 SV=1	10.447	10.314	10.14	10.076	10.472	9.731	9.967	9.919	9.896	9.969	0.761544	-0.393	0.007
252	Discs large 1, isoform M OS=Drosophila melanogaster GN=dlg1 PE=1 SV=1	3.752	3.593	4.484	3.777	3.821	4.543	4.079	4.787	4.75	4.106	1.48247	0.568	0.045
253	Fat facets, isoform E OS=Drosophila melanogaster GN=faf PE=3 SV=1	3.012	1.606	2.727	1.947	3.768	0.462	2.583	1.645	3.405	3.252	0.7884	-0.343	0.689
254	Probable ubiquitin carboxyl-terminal hydrolase FAF OS=Drosophila melanogaster GN=faf PE=1 SV=2	3.636	3.014	3.516	3.406	3.443	3.238	3.741	2.718	3.292	3.65	0.949342	-0.075	0.789
255	Acyl-CoA synthetase long-chain, isoform J OS=Drosophila melanogaster GN=Acsl PE=1 SV=1	11.218	11.137	10.889	11.149	11.595	11.034	11.2	11.239	11.217	11.376	1.01045	0.015	0.936
256	FI07923p OS=Drosophila melanogaster GN=Karybeta3 PE=1 SV=1	10.702	10.435	10.408	10.572	11.093	10.287	10.492	10.481	10.697	10.611	0.914465	-0.129	0.484
257	Thioester-containing protein 4, isoform C OS=Drosophila melanogaster GN=Tep4 PE=1 SV=1	10.375	10.662	10.637	10.086	11.171	11.289	11.829	11.527	11.3	11.568	1.88688	0.916	0.003
258	V-type proton ATPase subunit a OS=Drosophila melanogaster GN=Vha100-2 PE=1 SV=2	11.017	11.056	10.972	11.092	11.283	10.953	11.268	11.308	11.16	11.338	1.08749	0.121	0.316
259	Lingerer, isoform K OS=Drosophila melanogaster GN=lig PE=1 SV=1	9.453	9.505	9.508	9.533	9.494	9.635	9.684	9.611	9.521	9.524	1.06881	0.096	0.173
260	ATP synthase subunit d, mitochondrial OS=Drosophila melanogaster GN=ATPsynD PE=2 SV=2	12.06	11.63	11.459	11.588	12.307	10.54	10.557	10.627	10.711	10.961	0.456916	-1.13	0
262	Actin-interacting protein 1 OS=Drosophila melanogaster GN=flr PE=2 SV=1	10.947	10.778	10.593	10.762	11.159	10.556	10.703	10.723	11.028	11.016	0.970634	-0.043	0.823
263	Glutamine synthetase OS=Drosophila melanogaster GN=Gs2 PE=1 SV=1	11.325	11.258	11.16	11.192	11.496	11.424	11.747	11.8	11.686	11.934	1.3491	0.432	0.007
264	Muscle LIM protein Mlp84B OS=Drosophila melanogaster GN=Mlp84B PE=1 SV=1	11.033	11.21	10.991	11.163	11.489	10.735	11.195	11.376	10.997	11.445	0.980779	-0.028	0.902
265	Malate dehydrogenase OS=Drosophila melanogaster GN=Mdh1 PE=1 SV=2	11.477	11.486	11.285	11.38	11.696	11.074	11.586	11.483	11.502	11.629	0.993092	-0.01	0.961
266	Glycine cleavage system P protein OS=Drosophila melanogaster GN=CG3999 PE=1 SV=1	10.156	10.03	9.919	9.994	10.322	10.731	10.999	10.927	11.371	11.18	1.94127	0.957	0
267	CG6512, isoform A OS=Drosophila melanogaster GN=Dmel\CG6512 PE=1 SV=1	11.035	11.008	11.055	11.09	11.004	11.357	11.073	11.313	11.239	11.392	1.17772	0.236	0.019
268	Carboxylic ester hydrolase OS=Drosophila melanogaster GN=Est-6 PE=1 SV=1	10.531	10.705	10.346	10.483	10.974	10.933	11.748	11.611	10.966	11.638	1.70645	0.771	0.009
269	Lethal (2) 01289, isoform G OS=Drosophila melanogaster GN=l(2)01289 PE=1 SV=1	6.157	6.323	6.285	6.805	5.802	6.336	6.418	6.668	6.747	6.422	1.18427	0.244	0.278
270	Gamma-aminobutyric acid transaminase, isoform A OS=Drosophila melanogaster GN=Gabat PE=1 SV=1	11.363	11.203	10.952	11.215	11.693	10.833	11.345	11.415	11.661	11.705	1.07699	0.107	0.68
271	CG4752 OS=Drosophila melanogaster GN=CG4752-RA PE=1 SV=2	10.849	10.819	10.924	11.041	11.009	10.706	11	10.757	11.153	11.172	1.0203	0.029	0.851
272	Glycogen [starch] synthase OS=Drosophila melanogaster GN=GlyS PE=1 SV=2	11.571	11.556	11.501	11.655	11.968	10.862	11.067	11.332	11.365	11.343	0.729005	-0.456	0.014
273	Aconitate hydratase, mitochondrial OS=Drosophila melanogaster GN=CG4706 PE=2 SV=1	11.554	11.565	11.708	11.674	11.569	11.012	10.606	10.853	11	10.508	0.567228	-0.818	0
274	Combover, isoform A OS=Drosophila melanogaster GN=cmb PE=1 SV=2	7.603	7.526	7.733	7.878	7.612	7.412	7.285	7.527	7.471	7.484	0.849685	-0.235	0.038
275	La-related protein 1 OS=Drosophila melanogaster GN=larp PE=1 SV=5	10.194	10.216	10.158	10.308	9.948	10.238	10.24	10.061	10.181	10.115	1.00139	0.002	0.987
276	Lethal (2) 01289, isoform M OS=Drosophila melanogaster GN=l(2)01289 PE=1 SV=1	4.454	4.618	4.238	4.616	4.178	3.87	4.004	3.916	4.07	4.3	0.764188	-0.388	0.022
277	Fimbrin OS=Drosophila melanogaster GN=Fim PE=1 SV=1	11.613	11.531	11.617	11.46	11.568	11.703	12.004	11.9	11.603	11.903	1.2008	0.264	0.028
278	HL08109p OS=Drosophila melanogaster GN=yip2 PE=1 SV=1	11.31	11.068	11.014	11.066	11.331	11.118	11.485	11.341	11.618	11.754	1.23628	0.306	0.074
279	Trailer hitch, isoform H OS=Drosophila melanogaster GN=tral PE=1 SV=1	9.358	9.166	9.159	9.238	9.366	8.991	9.208	9.182	9.106	9.208	0.921464	-0.118	0.205
280	Succinate--CoA ligase [ADP-forming] subunit beta, mitochondrial OS=Drosophila melanogaster GN=skap PE=1 SV=1	12.045	11.873	11.759	11.806	12.095	11.095	11.077	11.397	11.575	11.655	0.680185	-0.556	0.007
281	Lamin-C OS=Drosophila melanogaster GN=LamC PE=1 SV=2	10.351	10.934	10.774	10.585	10.404	10.602	10.689	10.88	10.87	11.034	1.15269	0.205	0.232
282	CG3835, isoform A OS=Drosophila melanogaster GN=D2hgdh PE=1 SV=1	11.646	11.751	11.807	11.958	12.001	11.828	12.484	12.23	12.037	12.459	1.29684	0.375	0.047
283	CG6084, isoform D OS=Drosophila melanogaster GN=34F4T PE=1 SV=1	10.869	10.5	10.173	10.733	10.922	11.551	11.986	11.892	12.01	12.122	2.41664	1.273	0
284	FI12817p OS=Drosophila melanogaster GN=Nrx-IV PE=1 SV=2	11.244	11.041	11.017	11.03	11.033	11.16	10.968	11.161	11.418	11.32	1.09581	0.132	0.273
285	Amphiphysin, isoform B OS=Drosophila melanogaster GN=Amph PE=1 SV=1	6.812	6.716	6.908	6.939	6.733	6.535	7.152	6.894	6.802	7.032	1.04319	0.061	0.699
286	Elongation factor Tu OS=Drosophila melanogaster GN=mEFTu1 PE=1 SV=1	11.809	11.736	11.764	11.834	12.105	11.166	11.193	11.142	11.16	11.229	0.627636	-0.672	0
287	Uncharacterized protein, isoform B OS=Drosophila melanogaster GN=Dmel\CG18304 PE=4 SV=1	10.28	10.318	10.212	10.374	10.12	10.251	10.138	10.066	10.066	10.085	0.908148	-0.139	0.12
288	C11.1, isoform A OS=Drosophila melanogaster GN=c11.1 PE=1 SV=2	10.874	10.758	10.805	10.708	10.846	10.929	11.002	10.925	10.976	11.091	1.13761	0.186	0.025
289	Scribbled, isoform T OS=Drosophila melanogaster GN=scrib PE=1 SV=1	7.651	7.767	7.51	7.741	7.914	7.502	7.682	7.734	7.545	7.692	0.942131	-0.086	0.453
290	CG1371 OS=Drosophila melanogaster GN=CG1371 PE=1 SV=1	10.982	10.993	11.045	11.067	10.921	11.268	11.268	11.196	11.269	11.192	1.17854	0.237	0.004
291	Shibire, isoform P OS=Drosophila melanogaster GN=shi PE=1 SV=1	5.271	5.263	5.338	4.886	4.516	4.927	5.097	5.353	5.114	5.192	1.05848	0.082	0.721
292	N-ethylmaleimide-sensitive factor 2, isoform B OS=Drosophila melanogaster GN=Nsf2 PE=4 SV=1	9.655	9.758	9.769	9.717	9.74	9.706	9.793	9.696	9.699	9.696	0.993092	-0.01	0.893
293	Coronin OS=Drosophila melanogaster GN=coro PE=1 SV=1	6.159	6.296	6.249	6.106	5.859	6.299	6.237	6.277	6.103	6.007	1.03598	0.051	0.709
294	GH28348p OS=Drosophila melanogaster GN=jp PE=2 SV=1	10.432	10.465	10.35	10.404	10.608	10.081	10.055	10.082	9.952	10.186	0.767905	-0.381	0.001
295	LD47843p OS=Drosophila melanogaster GN=Slmap PE=1 SV=2	10.779	10.721	10.904	10.857	10.705	10.472	10.299	10.535	10.591	10.391	0.792235	-0.336	0.004
296	Gasp, isoform A OS=Drosophila melanogaster GN=Gasp PE=1 SV=1	7.94	7.442	8.149	8.042	6.452	8.803	7.562	7.5	8.646	7.741	1.36226	0.446	0.383
297	Coronin OS=Drosophila melanogaster GN=coro PE=1 SV=1	5.473	5.669	5.643	5.84	5.535	5.678	5.67	5.542	5.611	5.353	0.958599	-0.061	0.623
298	CG4546 OS=Drosophila melanogaster GN=CG4546 PE=2 SV=2	11.012	10.921	10.896	10.957	11.116	10.643	10.315	10.609	10.834	10.464	0.75419	-0.407	0.007
299	60S ribosomal protein L3 OS=Drosophila melanogaster GN=RpL3 PE=1 SV=3	11.457	11.155	11.156	11.39	11.413	10.808	11.188	10.956	11.422	11.309	0.88454	-0.177	0.289
300	Scribbled, isoform Q OS=Drosophila melanogaster GN=scrib PE=1 SV=1	6.174	6.144	6.122	6.032	6.145	6.171	6.271	6.273	6.022	6.029	1.02101	0.03	0.764
301	CG2658, isoform A OS=Drosophila melanogaster GN=CG2658 PE=1 SV=1	10.398	10.393	10.419	10.376	10.353	10.626	10.399	10.566	10.473	10.546	1.09733	0.134	0.083
302	AT21758p OS=Drosophila melanogaster GN=muc PE=1 SV=1	12.403	12.264	12.121	12.219	12.476	11.589	11.583	11.929	11.752	12.027	0.696889	-0.521	0.003
303	Aspartyl-tRNA synthetase, isoform A OS=Drosophila melanogaster GN=AspRS PE=1 SV=1	10.632	10.627	10.643	10.627	10.627	11.191	11.236	11.138	11.203	11.263	1.48968	0.575	0
304	CG4538, isoform C OS=Drosophila melanogaster GN=CG4538 PE=1 SV=1	10.769	10.601	10.648	10.745	10.653	10.644	10.117	10.415	10.568	10.559	0.856782	-0.223	0.098
305	Trifunctional purine biosynthetic protein adenosine-3 OS=Drosophila melanogaster GN=ade3 PE=1 SV=1	11.075	10.986	11.222	11.235	11.058	11.504	11.95	11.39	11.812	11.535	1.43694	0.523	0.004
306	Syncrip, isoform J OS=Drosophila melanogaster GN=Syp PE=1 SV=1	7.269	7.311	7.248	7.297	7.255	7.728	7.688	7.757	7.555	7.597	1.30949	0.389	0
307	60 kDa heat shock protein homolog 1, mitochondrial OS=Drosophila melanogaster GN=Hsp60B PE=2 SV=1	10.504	10.521	10.845	10.76	10.587	10.069	9.867	10.101	10.373	10.025	0.680185	-0.556	0.002
308	Coatomer subunit beta' OS=Drosophila melanogaster GN=beta'COP PE=2 SV=2	10.636	10.673	10.645	10.69	10.562	10.512	10.624	10.525	10.701	10.671	0.976032	-0.035	0.672
309	Transient receptor potential protein OS=Drosophila melanogaster GN=trp PE=1 SV=3	11.204	11.264	11.022	11.211	11.511	11.209	11.22	11.269	11.188	11.175	0.97942	-0.03	0.806
310	Heat shock 70 kDa protein cognate 1 OS=Drosophila melanogaster GN=Hsc70-1 PE=1 SV=1	10.033	9.936	9.945	9.983	9.891	10.031	9.781	9.797	10.183	10.156	1.02243	0.032	0.812
311	Dynamin related protein 1, isoform A OS=Drosophila melanogaster GN=Drp1 PE=1 SV=1	10.688	10.689	10.607	10.628	10.705	10.609	10.578	10.641	10.721	10.661	0.985549	-0.021	0.775
312	CG1979 OS=Drosophila melanogaster GN=CG1979 PE=4 SV=2	10.939	10.971	10.886	11	10.845	9.913	9.578	9.872	9.974	9.702	0.460094	-1.12	0
313	CAD protein OS=Drosophila melanogaster GN=r PE=1 SV=3	10.562	10.505	10.498	10.554	10.583	10.497	10.367	10.381	10.644	10.468	0.953299	-0.069	0.422
314	Discs large 1, isoform R OS=Drosophila melanogaster GN=dlg1 PE=1 SV=1	6.086	6.081	6.041	6.156	6.107	5.543	5.776	5.661	5.497	5.696	0.726986	-0.46	0
316	Transcription factor BTF3 OS=Drosophila melanogaster GN=Dmel\CG11835 PE=1 SV=1	11.135	11.275	11.31	11.567	10.733	11.167	10.76	10.528	11.026	10.54	0.758384	-0.399	0.094
317	Thioredoxin reductase 1, mitochondrial OS=Drosophila melanogaster GN=Trxr-1 PE=1 SV=2	11.563	11.486	11.448	11.517	11.803	11.246	11.486	11.41	11.48	11.603	0.920826	-0.119	0.317
318	FI05334p OS=Drosophila melanogaster GN=l(1)G0255 PE=1 SV=3	11.437	11.35	11.183	11.195	11.499	10.736	10.598	10.82	10.753	10.853	0.6685	-0.581	0
319	Triosephosphate isomerase OS=Drosophila melanogaster GN=Tpi PE=1 SV=3	11.602	11.265	11.094	11.285	11.86	10.686	10.679	10.778	10.943	11.203	0.676424	-0.564	0.017
320	CG8258 OS=Drosophila melanogaster GN=CCT8 PE=1 SV=1	11.374	11.171	11.23	11.321	11.35	11.047	10.936	11.093	11.605	11.345	0.943438	-0.084	0.621
321	Malic enzyme OS=Drosophila melanogaster GN=Men PE=1 SV=1	11.176	11.022	10.999	11.045	11.558	10.849	11.192	11.015	11.031	11.267	0.940174	-0.089	0.601
322	ATP synthase, delta subunit, isoform A OS=Drosophila melanogaster GN=ATPsyndelta PE=1 SV=1	11.579	11.088	10.88	11.201	12.019	9.79	9.992	10.072	10.193	10.608	0.428688	-1.222	0.002
323	GH21475p OS=Drosophila melanogaster GN=Spn77Bc PE=1 SV=3	10.207	10.28	9.847	9.952	10.61	9.793	10.79	10.721	9.721	10.721	1.12506	0.17	0.63
324	Phosphotransferase OS=Drosophila melanogaster GN=Hex-A PE=1 SV=1	10.919	10.837	10.77	10.921	11.232	9.847	10.214	10.259	10.284	10.411	0.601652	-0.733	0.001
325	Tubulin beta chain OS=Drosophila melanogaster GN=betaTub60D PE=1 SV=1	4.625	4.34	4.214	4.261	4.887	3.01	3.852	4.588	5.05	5.32	0.932386	-0.101	0.867
326	Succinate dehydrogenase [ubiquinone] iron-sulfur subunit, mitochondrial OS=Drosophila melanogaster GN=SdhB PE=2 SV=2	11.045	10.961	10.817	10.911	11.333	9.644	9.819	10.215	10.173	10.304	0.505927	-0.983	0
327	Lon protease homolog, mitochondrial OS=Drosophila melanogaster GN=Lon PE=1 SV=1	11.064	11.029	11.004	11.112	11.19	11.164	10.993	11.183	11.295	11.283	1.07475	0.104	0.278
328	LD37574p OS=Drosophila melanogaster GN=yps PE=1 SV=1	9.949	9.947	10.05	10.097	9.827	10.089	9.997	9.853	9.84	9.674	0.944092	-0.083	0.484
329	CG9914, isoform A OS=Drosophila melanogaster GN=CG9914 PE=1 SV=2	10.829	10.838	10.858	11.158	11.487	10.666	11.502	11.063	11.34	11.395	1.11651	0.159	0.526
330	Protein argonaute-2 OS=Drosophila melanogaster GN=AGO2 PE=1 SV=3	9.94	9.686	9.724	9.741	9.895	9.784	9.826	9.783	9.682	9.714	0.973329	-0.039	0.674
331	Mustard, isoform V OS=Drosophila melanogaster GN=mtd PE=1 SV=1	10.015	10.082	9.984	10.019	10.093	10.177	10.365	10.294	10.061	10.221	1.13682	0.185	0.046
332	GH15296p OS=Drosophila melanogaster GN=Scp1 PE=1 SV=1	12.261	12.141	11.867	11.976	12.261	11.599	11.971	11.921	11.942	12.146	0.879649	-0.185	0.23
333	Tubulin beta-3 chain OS=Drosophila melanogaster GN=betaTub60D PE=2 SV=2	4.029	3.781	3.717	3.832	3.572	2.932	3.517	3.501	4.509	4.459	0.997923	-0.003	0.995
334	Isoleucyl-tRNA synthetase, isoform A OS=Drosophila melanogaster GN=IleRS PE=1 SV=1	10.019	10.001	9.895	9.938	9.905	10.489	10.28	10.221	10.672	10.512	1.39765	0.483	0.002
335	Protein disulfide-isomerase (Fragment) OS=Drosophila melanogaster GN=ERp60 PE=1 SV=1	10.987	10.948	10.95	10.925	10.84	10.915	11.065	10.936	10.965	10.849	1.01115	0.016	0.853
336	FI05224p OS=Drosophila melanogaster GN=ThrRS PE=1 SV=2	10.989	10.953	11.007	11.031	11.019	10.646	10.505	10.608	10.807	10.69	0.785673	-0.348	0.001
337	Transport and Golgi organization protein 1 OS=Drosophila melanogaster GN=Tango1 PE=1 SV=2	10.743	10.785	10.788	10.858	10.632	10.947	10.966	10.853	10.873	10.805	1.09278	0.128	0.119
338	RE12569p OS=Drosophila melanogaster GN=CG10924 PE=1 SV=1	9.855	9.933	10.036	9.954	9.487	11.897	11.018	10.99	11.956	11.249	2.96699	1.569	0
339	Regucalcin, isoform D OS=Drosophila melanogaster GN=regucalcin PE=1 SV=1	11.221	11.042	11.011	10.932	11.282	10.93	11.332	11.315	11.408	11.585	1.16151	0.216	0.184
340	Peptidylprolyl isomerase OS=Drosophila melanogaster GN=FKBP59 PE=4 SV=1	10.911	10.932	10.91	10.954	10.82	10.566	10.553	10.527	10.607	10.359	0.76631	-0.384	0.001
341	BcDNA.GH08312 OS=Drosophila melanogaster GN=Sap-r PE=1 SV=1	11.673	11.469	11.618	11.552	11.617	11.446	11.711	11.552	11.485	11.541	0.973329	-0.039	0.682
342	Aspartate aminotransferase OS=Drosophila melanogaster GN=Got2 PE=1 SV=1	11.187	11.119	11.151	11.356	11.646	11.247	11.857	11.756	11.908	11.999	1.3765	0.461	0.036
343	Uncharacterized protein, isoform A OS=Drosophila melanogaster GN=Dmel\CG17514 PE=1 SV=2	11.038	11.023	11.043	11.052	10.896	11.163	10.971	10.932	11.158	11.02	1.0274	0.039	0.679
344	60S ribosomal protein L4 OS=Drosophila melanogaster GN=RpL4 PE=1 SV=2	11.509	11.516	11.528	11.615	11.557	11.466	11.576	11.554	11.745	11.598	1.03025	0.043	0.615
345	GH04942p OS=Drosophila melanogaster GN=nahoda PE=1 SV=2	10.408	10.34	10.32	10.399	10.268	10.415	10.198	10.253	10.396	10.305	0.976709	-0.034	0.699
346	NADH dehydrogenase [ubiquinone] flavoprotein 1, mitochondrial OS=Drosophila melanogaster GN=ND-51 PE=1 SV=1	11.428	11.374	11.254	11.347	11.641	9.774	9.888	10.076	10.176	10.216	0.383421	-1.383	0
347	26S proteasome regulatory complex subunit p50 OS=Drosophila melanogaster GN=Rpt5 PE=1 SV=1	10.344	10.294	10.34	10.319	10.128	10.383	10.266	10.271	10.335	10.179	1.00139	0.002	0.988
348	Glycerol-3-phosphate dehydrogenase [NAD(+)] OS=Drosophila melanogaster GN=CG31169-RB PE=2 SV=2	10.547	10.719	10.401	10.397	10.39	9.781	9.514	9.983	9.699	9.627	0.586417	-0.77	0
349	Rab32, isoform B OS=Drosophila melanogaster GN=Rab32 PE=1 SV=1	10.517	10.431	10.404	10.415	10.42	10.526	10.549	10.627	10.587	10.615	1.10496	0.144	0.04
350	LD47396p OS=Drosophila melanogaster GN=CCT7 PE=1 SV=2	11.182	11.028	11.118	11.247	11.171	10.759	10.745	10.689	11.05	10.822	0.792235	-0.336	0.006
351	GM12270p OS=Drosophila melanogaster GN=CCT5 PE=1 SV=1	11.107	10.987	11.049	11.071	11.066	10.961	10.807	10.898	11.299	11.04	0.962594	-0.055	0.657
352	Integrin beta OS=Drosophila melanogaster GN=mys PE=3 SV=1	10.897	10.772	10.969	10.835	10.903	10.924	11.015	10.899	10.841	10.871	1.02456	0.035	0.673
353	Non-specific serine/threonine protein kinase OS=Drosophila melanogaster GN=par-1 PE=1 SV=1	7.999	7.898	7.989	7.934	7.862	8.101	8.24	8.088	7.823	8.031	1.08673	0.12	0.251
354	Diacylglycerol kinase OS=Drosophila melanogaster GN=rdgA PE=3 SV=1	10.612	10.612	10.501	10.552	10.876	10.263	10.295	10.512	10.504	10.625	0.875998	-0.191	0.138
355	T-complex protein 1 subunit gamma OS=Drosophila melanogaster GN=Cctgamma PE=2 SV=2	10.73	10.577	10.655	10.716	10.626	10.573	10.432	10.534	10.963	10.768	0.99516	-0.007	0.969
356	Syncrip, isoform O OS=Drosophila melanogaster GN=Syp PE=1 SV=1	7.399	7.64	7.683	7.543	7.278	7.699	7.492	7.589	7.694	7.411	1.04826	0.068	0.605
357	V-type proton ATPase subunit a OS=Drosophila melanogaster GN=Vha100-1 PE=1 SV=1	6.526	6.66	6.727	6.801	6.977	6.883	6.705	6.623	6.218	6.14	0.856188	-0.224	0.271
358	Heat shock protein 68 OS=Drosophila melanogaster GN=Hsp68 PE=1 SV=1	10.926	10.79	10.939	11.035	11.099	10.62	10.78	10.902	11.109	10.89	0.934975	-0.097	0.457
359	BcDNA.HL02693 OS=Drosophila melanogaster GN=CRMP PE=1 SV=1	8.735	8.657	8.648	8.621	8.558	8.38	8.335	8.346	8.421	8.287	0.817902	-0.29	0.002
360	BcDNA.GH04962 OS=Drosophila melanogaster GN=GCS2alpha PE=1 SV=1	11.105	10.992	11.017	10.951	11.042	11.087	11.195	11.266	11.548	11.508	1.23114	0.3	0.028
361	Moesin, isoform L OS=Drosophila melanogaster GN=Moe PE=1 SV=1	11.264	11.2	11.135	11.168	11.302	11.259	11.372	11.326	11.434	11.44	1.11188	0.153	0.064
362	Vacuolar H[+]-ATPase 55kD subunit, isoform C OS=Drosophila melanogaster GN=Vha55 PE=1 SV=1	10.913	10.738	10.565	10.864	11.534	10.126	10.508	10.613	10.531	10.773	0.75106	-0.413	0.096
363	14-3-3zeta, isoform K OS=Drosophila melanogaster GN=14-3-3zeta PE=1 SV=1	11.174	11.003	10.979	10.982	11.106	10.962	11.004	11.079	10.935	11.089	0.976032	-0.035	0.69
364	Failed axon connections OS=Drosophila melanogaster GN=fax PE=1 SV=1	11.826	11.699	11.816	11.735	11.729	11.926	11.919	11.828	11.835	11.811	1.074	0.103	0.151
366	Cullin-associated and neddylation-dissociated 1, isoform B OS=Drosophila melanogaster GN=Cand1 PE=1 SV=1	10.72	10.698	10.674	10.742	10.644	10.779	10.626	10.622	10.797	10.601	0.992404	-0.011	0.907
367	Centrosome-associated zinc finger protein CP190 OS=Drosophila melanogaster GN=Cp190 PE=1 SV=2	10.027	10.022	10.012	9.927	9.927	9.923	9.888	9.896	9.879	9.833	0.93368	-0.099	0.134
368	Scribbled, isoform J OS=Drosophila melanogaster GN=scrib PE=1 SV=1	3.41	2.957	3.451	3.647	3.241	3.762	3.764	3.279	3.05	3.397	1.07848	0.109	0.645
369	AT04676p OS=Drosophila melanogaster GN=CG1640 PE=1 SV=3	11.206	11.181	10.999	11.126	11.39	10.89	11.188	11.147	11.305	11.343	0.99585	-0.006	0.975
370	Cytochrome c1, isoform A OS=Drosophila melanogaster GN=Cyt-c1 PE=1 SV=1	11.929	11.724	11.531	11.68	12.102	10.795	10.756	11.161	11.007	11.299	0.578344	-0.79	0.001
371	ATPase family AAA domain-containing protein 3A homolog OS=Drosophila melanogaster GN=bor PE=1 SV=2	11.379	11.331	11.338	11.326	11.403	11.586	11.385	11.63	11.583	11.682	1.16312	0.218	0.02
372	MIP08013p1 OS=Drosophila melanogaster GN=Mpcp PE=1 SV=1	11.09	11.018	10.876	10.91	11.193	10.923	11.097	11.295	11.399	11.493	1.16797	0.224	0.149
373	Receptor of activated protein kinase C 1, isoform C OS=Drosophila melanogaster GN=Rack1 PE=4 SV=1	11.027	10.9	10.864	11.105	11.126	11.181	11.198	11.121	11.713	11.369	1.24143	0.312	0.054
374	Syndapin, isoform C OS=Drosophila melanogaster GN=Synd PE=1 SV=1	10.795	10.764	10.744	10.694	10.838	10.828	10.985	10.872	10.765	10.829	1.06363	0.089	0.253
375	Aralar1, isoform F OS=Drosophila melanogaster GN=aralar1 PE=1 SV=1	5.39	5.75	5.634	5.851	5.911	5.722	5.889	5.718	5.479	5.905	1.02456	0.035	0.84
376	CG5604 OS=Drosophila melanogaster GN=Ufd4 PE=1 SV=1	9.657	9.632	9.589	9.669	9.487	10.007	9.773	9.793	9.942	9.877	1.20748	0.272	0.008
377	Nucleosome remodeling factor-38kD, isoform C OS=Drosophila melanogaster GN=Nurf-38 PE=1 SV=1	4.636	4.612	4.397	4.672	4.541	4.523	4.322	3.937	3.792	4.035	0.73255	-0.449	0.022
378	Tropomyosin 2, isoform E OS=Drosophila melanogaster GN=Tm2 PE=1 SV=1	11.134	11.343	11.553	11.213	11.632	10.849	10.703	11.111	10.737	11.105	0.719966	-0.474	0.012
380	CG3609, isoform A OS=Drosophila melanogaster GN=CT12127 PE=1 SV=1	10.872	10.83	10.834	10.968	11.243	10.727	11.321	11.092	11.192	11.199	1.11497	0.157	0.341
381	Superoxide dismutase [Cu-Zn] OS=Drosophila melanogaster GN=Sod PE=1 SV=2	10.951	10.62	10.611	10.733	11.009	11.028	11.427	11.344	11.256	11.577	1.45599	0.542	0.005
382	Sh3beta, isoform D OS=Drosophila melanogaster GN=Sh3beta PE=4 SV=1	8.505	8.467	8.501	8.549	8.479	8.297	8.541	8.309	8.275	8.35	0.903753	-0.146	0.087
383	Synapsin, isoform D OS=Drosophila melanogaster GN=Syn PE=1 SV=1	10.059	10.016	9.917	9.981	10.229	9.776	9.867	9.893	9.952	10.072	0.915099	-0.128	0.218
384	Serrate RNA effector molecule homolog OS=Drosophila melanogaster GN=Ars2 PE=1 SV=2	10.317	10.337	10.315	10.282	10.156	10.42	10.363	10.411	10.403	10.326	1.074	0.103	0.157
385	Calreticulin, isoform B OS=Drosophila melanogaster GN=Calr PE=1 SV=1	10.88	10.871	10.849	10.798	10.637	11.009	11.229	11.153	10.988	11.042	1.21167	0.277	0.011
386	CG6767, isoform B OS=Drosophila melanogaster GN=Dmel\CG6767 PE=1 SV=3	10.437	10.11	10.197	10.374	10.822	10.357	10.723	10.374	10.848	10.78	1.17202	0.229	0.261
387	UDP-glucose:glycoprotein glucosyltransferase OS=Drosophila melanogaster GN=Ugt PE=1 SV=2	10.116	10.017	9.928	10.028	10.03	9.888	9.993	9.956	10.211	10.224	1.02172	0.031	0.794
388	Probable 26S proteasome non-ATPase regulatory subunit 3 OS=Drosophila melanogaster GN=Rpn3 PE=2 SV=1	10.251	10.329	10.329	10.317	10.251	10.268	10.27	10.169	10.31	10.175	0.961261	-0.057	0.419
389	Probable medium-chain specific acyl-CoA dehydrogenase, mitochondrial OS=Drosophila melanogaster GN=CG12262 PE=2 SV=1	11.668	11.469	11.257	11.381	11.761	11.321	11.548	11.469	11.665	11.786	1.03598	0.051	0.767
390	Inactivation-no-after-potential D protein OS=Drosophila melanogaster GN=inaD PE=1 SV=2	10.451	10.477	10.247	10.287	10.677	10.246	10.246	10.278	10.134	10.213	0.86814	-0.204	0.078
391	Cathepsin L OS=Drosophila melanogaster GN=Cp1 PE=2 SV=2	10.948	10.585	11.078	10.912	10.837	11.123	11.258	11.102	11.429	11.279	1.28877	0.366	0.015
392	V-type proton ATPase subunit a OS=Drosophila melanogaster GN=Vha100-1 PE=1 SV=1	6.722	6.304	6.32	6.366	6.467	5.776	5.773	5.967	6.314	6.243	0.746907	-0.421	0.027
393	Trypsin OS=Sus scrofa PE=1 SV=1	11.806	11.65	11.532	11.587	11.887	11.471	11.776	11.978	11.387	12.146	1.04174	0.059	0.788
394	Keratin, type II cytoskeletal 1 OS=Homo sapiens GN=KRT1 PE=1 SV=6	9.533	10.6	8.51	9.377	10.905	12.842	8.963	8.247	9.598	8.535	0.902501	-0.148	0.91
395	Sh3beta, isoform E OS=Drosophila melanogaster GN=Sh3beta PE=1 SV=1	5.012	5.065	5.138	5.216	4.741	5.038	4.965	5.158	4.607	5.075	0.955283	-0.066	0.701
396	Proteasome-associated protein ECM29 homolog OS=Drosophila melanogaster GN=CG8858 PE=1 SV=1	10.284	10.268	10.243	10.293	10.286	10.19	10.127	10.101	10.195	10.155	0.91955	-0.121	0.06
397	Fatty acid (Long chain) transport protein, isoform F OS=Drosophila melanogaster GN=Fatp PE=1 SV=3	10.848	10.876	10.604	10.798	10.83	10.716	10.904	10.824	11.129	11.282	1.13288	0.18	0.228
398	AP-2 complex subunit alpha OS=Drosophila melanogaster GN=AP-2alpha PE=1 SV=1	10.826	10.74	10.655	10.665	10.806	10.462	10.543	10.537	10.78	10.705	0.911933	-0.133	0.187
399	Malic enzyme OS=Drosophila melanogaster GN=Men-b PE=1 SV=1	11.341	11.3	11.329	11.357	11.59	10.682	10.916	10.945	11.031	10.991	0.721965	-0.47	0.001
400	1-phosphatidylinositol 4,5-bisphosphate phosphodiesterase OS=Drosophila melanogaster GN=norpA PE=1 SV=4	10.924	10.869	10.591	10.804	11.226	10.397	10.441	10.584	10.511	10.527	0.762601	-0.391	0.014
401	Collapsin response mediator protein OS=Drosophila melanogaster GN=CRMP PE=1 SV=2	7.229	7.013	6.899	7.053	7.369	6.688	6.91	6.713	7.048	6.954	0.840896	-0.25	0.088
402	CG9629 OS=Drosophila melanogaster GN=Dmel\CG9629 PE=1 SV=1	10.87	10.863	10.846	10.947	10.985	11.059	11.438	11.158	11.419	11.461	1.32409	0.405	0.005
403	IA-2 protein tyrosine phosphatase, isoform C OS=Drosophila melanogaster GN=IA-2 PE=1 SV=4	10.017	9.92	9.787	9.837	10.282	9.852	9.994	10.058	9.958	10.186	1.02883	0.041	0.783
404	Peptidylprolyl isomerase OS=Drosophila melanogaster GN=Fkbp14 PE=1 SV=1	11.119	11.186	11.124	11.133	11.135	11.148	11.337	11.26	11.088	11.184	1.04536	0.064	0.421
405	Sec31 ortholog, isoform D OS=Drosophila melanogaster GN=Sec31 PE=1 SV=1	10.982	10.885	10.799	10.845	10.951	10.933	10.933	10.948	11.083	11.031	1.06659	0.093	0.237
406	Alpha-mannosidase OS=Drosophila melanogaster GN=LManII PE=1 SV=2	9.932	10.081	10.184	10.127	10.267	10.302	10.93	10.659	10.491	10.822	1.43694	0.523	0.006
407	Rab GDP dissociation inhibitor OS=Drosophila melanogaster GN=Gdi PE=1 SV=1	11.16	11.024	10.986	10.995	11.088	10.886	11.123	11.141	11.072	11.097	1.00905	0.013	0.893
408	Presequence protease, mitochondrial OS=Drosophila melanogaster GN=CG3107 PE=2 SV=2	10.927	10.931	10.867	10.9	10.873	10.777	10.581	10.69	10.854	10.746	0.888843	-0.17	0.046
409	CG6543, isoform A OS=Drosophila melanogaster GN=CG6543 PE=1 SV=1	10.888	10.712	10.781	10.805	11.263	10.959	11.505	11.467	11.682	11.84	1.51677	0.601	0.015
410	Gasp, isoform B OS=Drosophila melanogaster GN=Gasp PE=1 SV=1	4.742	3.759	4.828	4.805	3.006	5.533	4.375	4.508	5.46	4.8	1.63354	0.708	0.183
411	Uncharacterized protein, isoform O OS=Drosophila melanogaster GN=CG10737 PE=1 SV=1	10.487	10.441	10.285	10.349	10.475	10.054	10.232	10.198	10.08	10.245	0.843816	-0.245	0.013
412	Fatty acyl-CoA reductase OS=Drosophila melanogaster GN=CG10097 PE=1 SV=3	10.954	11.074	10.758	10.91	11.14	10.647	10.983	11.04	10.911	11.177	0.988971	-0.016	0.926
413	Plexin A, isoform A OS=Drosophila melanogaster GN=PlexA PE=1 SV=1	10.423	10.409	10.377	10.327	10.308	10.526	10.521	10.441	10.51	10.507	1.09581	0.132	0.054
414	Eukaryotic translation initiation factor 4G2, isoform A OS=Drosophila melanogaster GN=eIF4G2 PE=1 SV=2	10.38	10.413	10.481	10.559	10.324	10.29	10.124	10.227	10.238	9.977	0.835088	-0.26	0.019
415	Succinate--CoA ligase [GDP-forming] subunit beta, mitochondrial OS=Drosophila melanogaster GN=Sucb PE=1 SV=1	10.111	10.023	10.01	10.006	10.045	11.135	11.171	11.071	11.368	11.328	2.25949	1.176	0
416	Tyrosine--tRNA ligase OS=Drosophila melanogaster GN=TyrRS PE=1 SV=1	10.829	10.783	10.808	10.826	10.787	10.797	10.666	10.67	10.993	10.837	0.989657	-0.015	0.89
417	Glutathione S transferase S1, isoform D OS=Drosophila melanogaster GN=GstS1 PE=1 SV=1	7.221	7.055	7.141	7.227	7.421	5.863	5.052	5.636	5.91	5.766	0.337276	-1.568	0
418	T-complex protein 1 subunit delta OS=Drosophila melanogaster GN=CCT4 PE=1 SV=1	11.476	11.412	11.542	11.572	11.415	11.375	11.389	11.384	11.616	11.336	0.957271	-0.063	0.499
419	CAP, isoform X OS=Drosophila melanogaster GN=CAP PE=4 SV=1	6.78	7.094	7.07	7.08	7.159	7.212	7.286	7.539	7.382	7.537	1.27899	0.355	0.013
420	RIC-3, isoform H OS=Drosophila melanogaster GN=RIC-3 PE=1 SV=1	7.864	8.008	7.857	7.89	7.954	7.889	7.944	7.956	7.735	7.78	0.963262	-0.054	0.538
421	Serine hydroxymethyltransferase OS=Drosophila melanogaster GN=CG3011 PE=1 SV=1	10.125	10.049	10.055	10.201	10.53	10.305	10.778	10.527	10.981	10.823	1.40444	0.49	0.019
422	Myosin-IB OS=Drosophila melanogaster GN=Myo61F PE=1 SV=3	10.846	10.466	10.502	10.398	10.633	11.127	11.229	11.078	10.869	11.204	1.44593	0.532	0.002
423	Anon1A4 OS=Drosophila melanogaster GN=Df31 PE=1 SV=1	10.539	10.454	10.594	10.557	10.229	11.013	10.776	10.606	10.796	10.466	1.19416	0.256	0.091
424	Proteasome subunit alpha type-1 OS=Drosophila melanogaster GN=Prosalpha6 PE=1 SV=1	10.939	11.017	10.951	11.079	10.969	10.927	11.085	10.873	11.041	10.985	0.993781	-0.009	0.926
425	Adenylyl cyclase-associated protein OS=Drosophila melanogaster GN=capt PE=1 SV=2	11.023	10.856	10.923	10.994	11.197	10.59	10.745	10.672	10.674	10.792	0.810003	-0.304	0.008
426	Glutathione S-transferase S1 OS=Drosophila melanogaster GN=GstS1 PE=1 SV=2	9.18	8.927	9.093	8.954	8.951	8.023	7.799	7.667	8.269	7.854	0.46684	-1.099	0
427	Dynactin subunit 1 OS=Drosophila melanogaster GN=Gl PE=1 SV=2	9.984	9.943	9.973	9.988	10.033	9.95	10.079	10.005	9.986	10.096	1.0274	0.039	0.579
428	A kinase anchor protein 200, isoform D OS=Drosophila melanogaster GN=Akap200 PE=1 SV=1	9.236	9.256	9.223	9.176	9.4	8.983	8.978	9.115	8.808	8.764	0.796088	-0.329	0.008
429	Elongation factor 1-alpha OS=Drosophila melanogaster GN=eEF1alpha1 PE=1 SV=1	10.393	10.392	10.513	10.411	10.345	10.376	10.703	10.633	10.371	10.538	1.08147	0.113	0.278
430	Hemolectin, isoform A OS=Drosophila melanogaster GN=Hml PE=1 SV=2	9.427	9.307	10.007	9.337	9.607	9.952	10.417	10.362	9.899	10.185	1.54328	0.626	0.009
431	CG9512, isoform A OS=Drosophila melanogaster GN=CG9512 PE=1 SV=1	10.491	10.586	10.518	10.568	10.848	10.361	11.023	10.658	10.538	10.859	1.06142	0.086	0.63
432	cGMP-dependent protein kinase, isozyme 2 forms cD4/T1/T3A/T3B OS=Drosophila melanogaster GN=for PE=1 SV=3	11.021	11.024	10.707	10.731	11.279	10.634	10.628	10.71	10.652	10.714	0.820742	-0.285	0.055
433	Signal recognition particle subunit SRP72 OS=Drosophila melanogaster GN=Srp72 PE=1 SV=1	10.298	10.408	10.315	10.312	10.243	10.333	10.3	10.212	10.299	10.208	0.96929	-0.045	0.546
434	p-element somatic inhibitor, isoform C OS=Drosophila melanogaster GN=Psi PE=1 SV=1	10.079	10.078	10.078	10.137	9.965	9.914	9.893	9.947	9.99	9.774	0.892547	-0.164	0.05
435	Dicer-2, isoform A OS=Drosophila melanogaster GN=Dcr-2 PE=1 SV=1	10.176	10.185	10.224	10.227	10.244	10.214	10.189	10.046	10.045	10.013	0.926588	-0.11	0.157
436	10-formyltetrahydrofolate dehydrogenase OS=Drosophila melanogaster GN=Dmel\CG8665 PE=1 SV=3	10.032	10.291	10.309	10.119	10.421	10.079	10.269	9.805	10.37	10.166	0.934975	-0.097	0.541
437	Jitterbug, isoform N OS=Drosophila melanogaster GN=jbug PE=1 SV=1	9.964	10.131	10.089	10.074	9.87	10.176	10.094	10.214	10.27	10.167	1.11651	0.159	0.08
438	Kinesin light chain OS=Drosophila melanogaster GN=Klc PE=1 SV=1	10.467	10.398	10.356	10.307	10.449	10.374	10.475	10.383	10.314	10.419	0.998615	-0.002	0.981
439	HL08057p OS=Drosophila melanogaster GN=Pdh PE=1 SV=1	10.804	10.866	10.726	10.768	10.863	11.237	11.295	11.279	11.174	11.308	1.36888	0.453	0
440	Synaptotagmin 1, isoform H OS=Drosophila melanogaster GN=Syt1 PE=4 SV=1	6.018	5.984	6.128	6.343	6.139	6.522	6.221	6.359	6.337	6.281	1.16635	0.222	0.059
441	Peroxiredoxin 1 OS=Drosophila melanogaster GN=Jafrac1 PE=1 SV=1	11.462	11.267	11.142	11.292	11.624	11.466	11.621	11.685	11.542	11.808	1.2033	0.267	0.059
442	Unc-112-related protein OS=Drosophila melanogaster GN=Fit1 PE=1 SV=1	10.656	10.639	10.524	10.639	10.754	10.731	10.769	10.929	10.972	10.964	1.17283	0.23	0.025
443	RIC-3, isoform C OS=Drosophila melanogaster GN=RIC-3 PE=1 SV=4	6.599	6.565	6.498	6.545	7.049	6.119	6.467	6.253	6.613	6.672	0.85441	-0.227	0.221
444	CG6287 OS=Drosophila melanogaster GN=GH26 PE=1 SV=1	11.03	10.826	10.906	11.049	11.332	10.728	11.22	11.078	11.617	11.419	1.13603	0.184	0.402
445	Z band alternatively spliced PDZ-motif protein 52, isoform O OS=Drosophila melanogaster GN=Zasp52 PE=1 SV=1	6.928	7.072	6.667	6.731	7.151	6.367	6.124	6.376	5.927	6.153	0.607097	-0.72	0.001
446	Regulatory particle non-ATPase 13, isoform G OS=Drosophila melanogaster GN=Rpn13 PE=1 SV=1	6.36	6.486	6.511	6.552	6.538	6.364	6.527	6.19	6.309	6.14	0.880869	-0.183	0.097
447	GH08474p OS=Drosophila melanogaster GN=CG11876 PE=1 SV=1	11.323	11.229	11.049	11.243	11.552	10.134	10.344	10.557	10.589	10.795	0.576343	-0.795	0.001
448	Chitinase-like protein Idgf4 OS=Drosophila melanogaster GN=Idgf4 PE=2 SV=1	10.608	10.427	10.616	10.416	10.77	10.79	11.138	10.843	10.832	10.993	1.27633	0.352	0.013
449	CG2118, isoform A OS=Drosophila melanogaster GN=CG2118 PE=1 SV=2	6.335	6.291	6.067	6.381	6.688	5.756	6.122	6.116	6.945	7.259	1.06216	0.087	0.83
450	Kazachoc, isoform D OS=Drosophila melanogaster GN=kcc PE=1 SV=1	7.062	7.148	7.105	6.89	6.917	7.355	7.418	7.251	7.098	7.163	1.17446	0.232	0.045
451	CG7834, isoform A OS=Drosophila melanogaster GN=CG7834 PE=1 SV=1	11.836	11.712	11.685	11.872	12.239	10.883	11.426	11.237	11.216	11.508	0.65293	-0.615	0.005
452	Serine/threonine-protein phosphatase 2B catalytic subunit 3 OS=Drosophila melanogaster GN=CanA-14F PE=1 SV=4	9.719	9.68	9.666	9.718	9.611	9.596	9.552	9.569	9.47	9.459	0.90125	-0.15	0.043
453	DnaJ-like-2, isoform A OS=Drosophila melanogaster GN=Droj2 PE=1 SV=1	10.688	10.631	10.649	10.635	10.861	10.695	10.74	10.653	10.801	10.827	1.03526	0.05	0.575
454	Eukaryotic translation initiation factor 3 subunit C OS=Drosophila melanogaster GN=eIF3c PE=3 SV=1	11.137	11.166	11.237	11.213	10.967	11.326	11.232	11.151	11.277	11.132	1.05702	0.08	0.389
455	Kismet, isoform C OS=Drosophila melanogaster GN=kis PE=1 SV=1	9.423	9.412	9.398	9.337	9.228	9.671	9.528	9.438	9.457	9.4	1.10114	0.139	0.133
456	Jaguar, isoform L OS=Drosophila melanogaster GN=jar PE=1 SV=1	10.359	10.564	10.642	10.754	10.822	9.83	10.084	10.863	10.555	10.519	0.836246	-0.258	0.299
457	Calbindin 53E, isoform B OS=Drosophila melanogaster GN=Cbp53E PE=4 SV=1	10.611	10.627	10.506	10.543	10.585	10.643	10.827	10.777	10.585	10.714	1.09809	0.135	0.106
458	Fasciclin 2, isoform G OS=Drosophila melanogaster GN=Fas2 PE=1 SV=1	10.017	9.921	9.897	9.933	10.075	9.841	9.998	10.105	9.926	10.135	1.02243	0.032	0.756
459	Putative cysteine proteinase CG12163 OS=Drosophila melanogaster GN=CG12163 PE=2 SV=2	9.73	9.695	9.87	9.75	9.949	9.919	10.015	9.972	10.142	10.054	1.16554	0.221	0.028
460	Amphiphysin, isoform C OS=Drosophila melanogaster GN=Amph PE=1 SV=1	6.303	6.063	5.968	5.927	6.445	5.347	4.99	5.242	5.309	5.577	0.555554	-0.848	0.001
461	Ubiquitinyl hydrolase 1 OS=Drosophila melanogaster GN=Usp5 PE=1 SV=1	10.862	10.812	10.836	10.848	10.869	10.838	10.84	10.783	10.907	10.823	0.99516	-0.007	0.923
462	Carnitine O-Acetyl-Transferase, isoform A OS=Drosophila melanogaster GN=CRAT PE=1 SV=2	10.774	10.833	10.813	10.852	10.865	10.582	10.558	10.725	10.731	10.74	0.895025	-0.16	0.048
463	Serpin 38F, isoform A OS=Drosophila melanogaster GN=Spn38F PE=3 SV=3	11.054	11.135	11.008	11.064	11.655	10.57	11.21	11.177	10.68	11.154	0.855595	-0.225	0.321
464	Hu li tai shao, isoform Q OS=Drosophila melanogaster GN=hts PE=1 SV=1	10.47	10.872	10.619	10.81	10.955	10.581	10.697	11.031	11.11	11.167	1.12662	0.172	0.357
465	NAT1 ortholog, isoform A OS=Drosophila melanogaster GN=Naa15-16 PE=1 SV=1	10.466	10.561	10.629	10.685	10.485	10.523	10.482	10.396	10.563	10.379	0.934975	-0.097	0.268
466	CG2025 OS=Drosophila melanogaster GN=Nrd1 PE=1 SV=2	11.162	11.18	11.195	11.245	11.133	10.877	10.937	10.989	10.957	10.914	0.842063	-0.248	0.002
467	GH13725p OS=Drosophila melanogaster GN=CCT6 PE=1 SV=1	11.056	10.766	10.844	10.913	11.183	10.648	10.598	10.668	11.238	11.118	0.93368	-0.099	0.626
468	Ribosomal protein S3, isoform B OS=Drosophila melanogaster GN=RpS3 PE=1 SV=1	11.416	11.411	11.392	11.514	11.349	11.426	11.388	11.329	11.717	11.477	1.03598	0.051	0.642
469	RE11562p OS=Drosophila melanogaster GN=CG17337 PE=1 SV=1	11.087	10.984	11.064	11.032	11.292	11.053	11.229	11.107	11.338	11.336	1.08749	0.121	0.274
470	Probable peroxisomal acyl-coenzyme A oxidase 1 OS=Drosophila melanogaster GN=CG5009 PE=1 SV=1	10.706	10.657	10.573	10.499	10.498	10.539	10.52	10.434	10.536	10.58	0.955945	-0.065	0.432
471	LD23884p OS=Drosophila melanogaster GN=CG4410 PE=1 SV=2	10.052	10.017	9.953	10.018	9.965	9.941	9.907	10.106	9.936	10.173	1.00835	0.012	0.907
472	CG7813 OS=Drosophila melanogaster GN=CG7813-RA PE=2 SV=1	11.046	11.123	11.173	11.113	10.805	10.798	10.545	10.722	10.55	10.354	0.727995	-0.458	0.005
473	CG5080, isoform A OS=Drosophila melanogaster GN=CT16297 PE=1 SV=1	10.51	10.012	10.506	10.091	10.239	10.539	10.736	10.437	10.801	10.722	1.29684	0.375	0.029
474	26S proteasome regulatory complex subunit p48A OS=Drosophila melanogaster GN=Rpt3 PE=1 SV=1	10.434	10.242	10.268	10.288	10.649	10.219	10.336	10.288	10.57	10.652	1.02598	0.037	0.824
475	Carnitine palmitoyltransferase 2 OS=Drosophila melanogaster GN=CPT2 PE=1 SV=1	10.704	10.697	10.49	10.555	11.057	10.147	10.306	10.291	10.339	10.425	0.758384	-0.399	0.013
476	26S proteasome regulatory subunit 4 OS=Drosophila melanogaster GN=Rpt2 PE=1 SV=2	10.641	10.602	10.626	10.654	10.506	10.613	10.599	10.518	10.653	10.55	0.986917	-0.019	0.808
477	Receptor mediated endocytosis 8, isoform A OS=Drosophila melanogaster GN=Rme-8 PE=1 SV=1	9.898	9.986	9.985	9.936	9.838	10.075	9.972	9.913	10.005	9.908	1.0324	0.046	0.557
478	Epidermal growth factor receptor pathway substrate clone 15, isoform B OS=Drosophila melanogaster GN=Eps-15 PE=1 SV=1	7.169	7.02	7.048	7.098	7.321	7.027	7.035	7.183	7.001	6.979	0.942131	-0.086	0.373
479	Twenty-four, isoform B OS=Drosophila melanogaster GN=tyf PE=1 SV=1	9.101	9.179	8.987	9.199	9.018	9.19	9.145	9.075	9.098	8.963	0.997923	-0.003	0.981
480	Kazachoc, isoform G OS=Drosophila melanogaster GN=kcc PE=1 SV=1	5.306	4.872	4.797	4.922	5.294	3.221	3.646	4.222	4.611	4.346	0.49005	-1.029	0.008
481	Bicaudal D, isoform D OS=Drosophila melanogaster GN=BicD PE=1 SV=1	9.811	9.892	9.867	9.943	9.799	9.992	9.932	9.789	9.871	9.844	1.01607	0.023	0.787
482	CIN85 and CD2AP orthologue, isoform J OS=Drosophila melanogaster GN=cindr PE=1 SV=1	5.92	5.988	5.789	5.832	5.784	6.459	6.409	6.228	6.181	6.283	1.36509	0.449	0.001
483	CG3902 OS=Drosophila melanogaster GN=GH07925p PE=1 SV=1	10.281	10.116	10.321	10.383	10.603	10.875	11.502	11.334	11.271	11.63	1.9752	0.982	0
484	Eukaryotic initiation factor 4A OS=Drosophila melanogaster GN=eIF4A PE=1 SV=3	10.967	10.701	10.8	10.903	11.158	10.602	10.621	10.616	10.713	10.575	0.82302	-0.281	0.023
485	Serpin 77Bb OS=Drosophila melanogaster GN=Spn77Bb PE=1 SV=3	8.736	9.347	9.116	9.049	9.298	8.81	9	9.359	7.781	9.416	0.849096	-0.236	0.549
486	GH21316p OS=Drosophila melanogaster GN=Ssadh PE=1 SV=1	10.778	10.783	10.701	10.711	10.863	10.881	11.106	10.998	10.91	10.978	1.15429	0.207	0.021
487	Golgi matrix protein 130 kD ortholog OS=Drosophila melanogaster GN=GM130 PE=1 SV=2	9.703	9.78	9.772	9.795	9.567	9.806	9.896	9.733	9.754	9.635	1.02883	0.041	0.67
488	Aconitate hydratase OS=Drosophila melanogaster GN=Irp-1A PE=1 SV=1	10.309	10.361	10.325	10.359	10.475	10.284	10.371	10.343	10.331	10.261	0.967276	-0.048	0.508
489	RuvB-like helicase 2 OS=Drosophila melanogaster GN=rept PE=1 SV=1	10.438	10.447	10.49	10.475	10.489	10.7	10.528	10.669	10.694	10.553	1.11806	0.161	0.039
490	Hyperplastic discs, isoform B OS=Drosophila melanogaster GN=hyd PE=1 SV=1	9.025	9.13	9.231	9.202	8.967	9.315	9.2	9.281	9.203	9.226	1.09733	0.134	0.131
491	Synaptotagmin 1, isoform I OS=Drosophila melanogaster GN=Syt1 PE=4 SV=1	7.474	7.424	7.506	7.444	7.465	7.482	7.399	7.353	7.44	7.261	0.948684	-0.076	0.314
492	Lethal(2) giant larvae protein OS=Drosophila melanogaster GN=l(2)gl PE=1 SV=2	10.223	10.03	9.999	9.995	10.173	10.11	10.112	10.066	10.271	10.288	1.06142	0.086	0.384
493	E3 UFM1-protein ligase 1 homolog OS=Drosophila melanogaster GN=Ufl1 PE=2 SV=1	10.214	10.266	10.198	10.248	10.068	10.283	10.262	10.219	10.348	10.213	1.04681	0.066	0.389
494	Cation-transporting ATPase OS=Drosophila melanogaster GN=BcDNA:GH06032 PE=1 SV=1	10.65	10.698	10.747	10.714	10.583	10.677	10.753	10.638	10.638	10.572	0.984184	-0.023	0.783
495	Uncharacterized protein, isoform E OS=Drosophila melanogaster GN=CG34120 PE=4 SV=1	10.303	10.43	10.311	10.293	10.406	10.352	10.371	10.369	10.399	10.375	1.01677	0.024	0.736
496	Multidrug-Resistance like protein 1, isoform M OS=Drosophila melanogaster GN=MRP PE=1 SV=1	5.106	5.259	5.85	5.644	5.385	6.072	6.106	5.864	5.702	5.86	1.38703	0.472	0.025
497	Fatty acyl-CoA reductase OS=Drosophila melanogaster GN=CT32316 PE=2 SV=2	10.664	10.615	10.274	10.542	10.376	10.436	10.625	10.681	10.787	10.735	1.11651	0.159	0.218
498	CG2118, isoform B OS=Drosophila melanogaster GN=CG2118 PE=1 SV=1	3.448	3.63	3.683	4.108	3.21	3.448	4.251	3.977	2.993	3.122	0.961261	-0.057	0.886
499	Piezo-type mechanosensitive ion channel component OS=Drosophila melanogaster GN=Piezo PE=1 SV=2	9.089	9.107	9.026	9.09	9.23	8.999	8.912	8.878	8.899	8.896	0.875391	-0.192	0.019
500	Immune-induced peptides OS=Drosophila melanogaster GN=IMPPP PE=1 SV=3	11.535	9.124	11.649	9.791	10.473	9.846	10.45	10.078	10.447	10.054	0.790041	-0.34	0.591
501	ALG-2 interacting protein X OS=Drosophila melanogaster GN=ALiX PE=1 SV=1	10.821	10.73	10.793	10.751	10.835	10.756	10.767	10.75	10.91	10.928	1.02527	0.036	0.661
502	Muscle-specific protein 20 OS=Drosophila melanogaster GN=Mp20 PE=2 SV=2	10.952	10.867	10.661	10.813	11.203	10.865	11.179	11.254	11.36	11.464	1.25266	0.325	0.07
503	Glucose-6-phosphate 1-dehydrogenase OS=Drosophila melanogaster GN=Zw PE=1 SV=2	7.99	8.115	7.942	8.061	8.221	7.618	8.088	7.823	7.905	7.885	0.869345	-0.202	0.105
504	Epidermal growth factor receptor pathway substrate clone 15, isoform A OS=Drosophila melanogaster GN=Eps-15 PE=1 SV=2	5.565	5.215	5.689	5.305	5.302	5.413	5.676	5.585	5.374	5.31	1.0403	0.057	0.721
505	Multidrug-Resistance like protein 1, isoform C OS=Drosophila melanogaster GN=MRP PE=1 SV=1	6.316	6.191	6.099	5.962	6.206	6.618	6.042	6.299	6.748	6.377	1.19914	0.262	0.137
506	AT27578p OS=Drosophila melanogaster GN=rin PE=1 SV=1	9.744	9.728	9.779	9.734	9.844	9.757	9.651	9.871	9.821	9.882	1.02172	0.031	0.725
507	Methionyl-tRNA synthetase OS=Drosophila melanogaster GN=MetRS PE=1 SV=1	10.214	10.11	10.071	10.135	10	10.177	10.133	10.153	10.306	10.128	1.0519	0.073	0.371
508	ATP synthase subunit beta OS=Drosophila melanogaster GN=ATPsynbetaL PE=2 SV=1	10.069	10.108	10.211	10.198	9.949	10.01	9.753	10.016	10.031	9.684	0.865737	-0.208	0.092
509	Basigin, isoform G OS=Drosophila melanogaster GN=Bsg PE=1 SV=1	7.924	7.923	7.97	7.886	8.071	8.569	8.607	8.521	8.272	8.377	1.428	0.514	0
511	LD22449p OS=Drosophila melanogaster GN=Tsf2 PE=1 SV=1	10.362	10.29	10.24	10.296	10.354	10.197	10.201	10.342	10.356	10.425	0.997231	-0.004	0.971
512	Myosin binding subunit, isoform N OS=Drosophila melanogaster GN=Mbs PE=1 SV=1	8.555	8.764	8.663	8.629	8.496	8.961	8.919	8.802	8.532	8.612	1.10496	0.144	0.266
513	BIR repeat containing ubiquitin-conjugating enzyme, isoform C OS=Drosophila melanogaster GN=Bruce PE=1 SV=1	9.432	9.524	9.499	9.476	9.434	9.621	9.56	9.535	9.485	9.405	1.03383	0.048	0.529
514	Calnexin 99A, isoform A OS=Drosophila melanogaster GN=Cnx99A PE=1 SV=2	9.771	9.803	9.828	9.824	9.542	9.966	10.088	9.965	9.937	9.897	1.16231	0.217	0.032
515	Prohibitin 2, isoform E OS=Drosophila melanogaster GN=Phb2 PE=1 SV=1	11.415	11.295	11.315	11.45	11.511	11.452	11.283	11.694	11.912	11.915	1.19251	0.254	0.135
516	Phenoloxidase 2 OS=Drosophila melanogaster GN=PPO2 PE=1 SV=1	10.194	10.052	9.919	9.917	9.944	10.371	10.736	10.747	10.435	10.684	1.5042	0.589	0.001
517	Coatomer subunit beta OS=Drosophila melanogaster GN=betaCOP PE=2 SV=2	9.903	9.911	9.849	9.898	9.776	9.886	10.047	10.033	10.119	10.074	1.12039	0.164	0.05
518	ATP synthase subunit b, mitochondrial OS=Drosophila melanogaster GN=ATPsynB PE=2 SV=2	12.185	12.08	11.943	12.047	12.387	10.523	10.634	10.837	11.093	11.044	0.405564	-1.302	0
519	GH04180p OS=Drosophila melanogaster GN=c62E-15 PE=1 SV=1	7.395	7.531	7.287	7.408	7.16	7.15	7.303	6.928	6.543	6.509	0.721965	-0.47	0.039
520	Proteasomal ubiquitin receptor ADRM1 homolog OS=Drosophila melanogaster GN=Rpn13 PE=1 SV=1	6.786	6.839	6.994	6.861	6.53	7.2	7.163	7.27	7.137	6.998	1.27633	0.352	0.011
521	Myosin 31DF, isoform C OS=Drosophila melanogaster GN=Myo31DF PE=3 SV=1	10.658	10.375	10.643	10.527	10.611	10.693	11.016	10.922	10.586	10.87	1.19334	0.255	0.054
522	Succinate--CoA ligase [ADP/GDP-forming] subunit alpha, mitochondrial OS=Drosophila melanogaster GN=Scsalpha PE=2 SV=3	11.484	11.346	11.263	11.425	11.834	10.575	10.758	10.916	10.991	11.166	0.664804	-0.589	0.006
523	Tubulin alpha-2 chain OS=Drosophila melanogaster GN=alphaTub85E PE=1 SV=1	7.381	7.151	7.196	7.155	7.283	7	7.02	7.256	7.613	7.464	1.02598	0.037	0.838
524	Coatomer subunit gamma OS=Drosophila melanogaster GN=gammaCOP PE=1 SV=1	9.734	9.654	9.644	9.7	9.596	9.544	9.55	9.568	9.881	9.772	0.997923	-0.003	0.984
525	Aldehyde dehydrogenase OS=Drosophila melanogaster GN=Aldh-III PE=1 SV=1	10.639	10.516	10.308	10.471	10.722	10.034	10.211	10.239	10.396	10.404	0.827023	-0.274	0.048
526	CG4836, isoform E OS=Drosophila melanogaster GN=CG4836 PE=1 SV=1	10.528	10.606	10.391	10.4	10.321	9.494	9.151	9.697	9.612	9.468	0.512278	-0.965	0
527	V-type proton ATPase subunit H OS=Drosophila melanogaster GN=VhaSFD PE=2 SV=2	10.601	10.561	10.453	10.67	11.026	10.43	10.745	10.835	11.216	11.301	1.18345	0.243	0.297
528	Acetyl-coenzyme A synthetase OS=Drosophila melanogaster GN=AcCoAS PE=1 SV=2	10.624	10.535	10.425	10.594	10.685	10.673	10.877	10.957	11.113	10.889	1.25614	0.329	0.012
529	Probable phosphorylase b kinase regulatory subunit alpha OS=Drosophila melanogaster GN=CG7766 PE=1 SV=2	10.605	10.583	10.432	10.536	10.762	9.662	9.63	9.66	9.807	9.854	0.550571	-0.861	0
530	Trehalase OS=Drosophila melanogaster GN=Treh PE=1 SV=1	10.772	10.628	10.522	10.66	11.007	10.003	10.222	10.396	10.481	10.567	0.76631	-0.384	0.032
531	40S ribosomal protein S3a OS=Drosophila melanogaster GN=RpS3A PE=1 SV=4	10.953	10.854	10.829	10.984	10.937	10.912	10.967	10.928	11.385	11.199	1.12272	0.167	0.202
532	Caprin, isoform B OS=Drosophila melanogaster GN=Capr PE=1 SV=1	9.615	9.741	9.698	9.644	9.483	10.1	10.028	10.088	9.911	9.838	1.28076	0.357	0.003
533	LP20978p OS=Drosophila melanogaster GN=SerRS PE=1 SV=1	10.85	10.775	10.836	10.897	10.904	10.463	10.659	10.523	10.718	10.768	0.855002	-0.226	0.027
534	RE56564p OS=Drosophila melanogaster GN=CG11473 PE=1 SV=1	8.711	8.65	8.641	8.602	8.535	8.787	8.641	8.598	8.69	8.672	1.03526	0.05	0.528
535	CG4847, isoform D OS=Drosophila melanogaster GN=CG4847-RD PE=1 SV=1	10.75	10.891	10.715	10.873	11.507	10.256	11.145	11.042	10.657	11.35	0.961261	-0.057	0.865
536	Inositol-3-phosphate synthase OS=Drosophila melanogaster GN=Inos PE=1 SV=1	10.531	10.612	10.517	10.573	10.466	10.63	10.946	10.851	10.726	10.833	1.19499	0.257	0.013
537	Carboxylic ester hydrolase OS=Drosophila melanogaster GN=alpha-Est7 PE=1 SV=1	9.79	9.841	9.626	9.762	10.331	9.882	10.347	10.339	10.21	10.554	1.31585	0.396	0.063
538	Ribosomal protein L9, isoform C OS=Drosophila melanogaster GN=RpL9 PE=4 SV=1	10.465	10.323	10.4	10.588	10.58	10.358	10.415	10.274	10.853	10.516	1.00835	0.012	0.948
539	BcDNA.GH10614 OS=Drosophila melanogaster GN=BcDNA:GH10614 PE=1 SV=1	10.551	10.519	10.465	10.592	10.82	10.037	10.501	10.297	10.294	10.427	0.824734	-0.278	0.047
540	Xaa-Pro aminopeptidase ApepP OS=Drosophila melanogaster GN=ApepP PE=1 SV=1	10.38	10.434	10.373	10.439	10.448	10.409	10.438	10.43	10.58	10.498	1.03958	0.056	0.431
541	T-complex protein 1 subunit alpha OS=Drosophila melanogaster GN=T-cp1 PE=2 SV=2	11.237	11.101	11.213	11.231	11.122	11.065	10.887	10.935	11.285	11.054	0.910039	-0.136	0.204
542	AT07710p OS=Drosophila melanogaster GN=CG7910 PE=2 SV=1	10.301	10.254	10.133	10.348	10.399	9.57	9.683	9.536	9.646	9.71	0.633756	-0.658	0
543	Peptidyl-prolyl cis-trans isomerase OS=Drosophila melanogaster GN=Cyp1 PE=1 SV=2	10.474	10.155	10.044	10.352	10.903	9.403	9.843	10.081	10.898	10.981	0.904379	-0.145	0.746
544	Phosphotransferase OS=Drosophila melanogaster GN=Hex-C PE=1 SV=1	10.987	10.797	10.604	10.931	11.515	10.004	10.576	10.455	10.45	10.575	0.680657	-0.555	0.026
545	CG9572, isoform A OS=Drosophila melanogaster GN=CG9572-RA PE=2 SV=1	9.804	9.752	9.725	9.622	9.92	9.88	10.049	10.082	9.701	10.021	1.13446	0.182	0.127
546	AT02443p OS=Drosophila melanogaster GN=exu PE=1 SV=1	10.137	10.206	10.265	10.332	10.243	10.169	10.171	10.414	10.303	10.042	0.988286	-0.017	0.886
547	Eukaryotic translation initiation factor 3 subunit M OS=Drosophila melanogaster GN=Tango7 PE=2 SV=1	10.47	10.359	10.392	10.45	10.534	10.307	10.217	10.187	10.573	10.41	0.93174	-0.102	0.348
548	Maltase A1 OS=Drosophila melanogaster GN=Mal-A1 PE=2 SV=2	10.648	10.719	10.856	11.221	11.438	10.266	11.333	10.702	10.717	10.885	0.872968	-0.196	0.496
549	GH13256p OS=Drosophila melanogaster GN=Thiolase PE=1 SV=1	11.024	10.845	10.75	10.777	11.008	10.353	10.576	10.66	10.997	11.126	0.908778	-0.138	0.479
550	LD18774p OS=Drosophila melanogaster GN=OstDelta PE=1 SV=1	11.172	11.042	11.037	11.066	11.061	10.71	10.93	10.747	10.817	10.941	0.843231	-0.246	0.011
551	Dynein assembly factor 1, axonemal homolog OS=Drosophila melanogaster GN=dtr PE=2 SV=2	9.381	9.427	9.509	9.556	9.286	9.383	9.122	9.32	9.176	8.779	0.825878	-0.276	0.075
552	Larval serum protein 1 beta, isoform B OS=Drosophila melanogaster GN=Lsp1beta PE=4 SV=1	8.736	8.631	11.251	10.205	8.807	10.509	10.981	10.757	12.233	11.098	3.01049	1.59	0.039
553	ATP synthase subunit O, mitochondrial OS=Drosophila melanogaster GN=ATPsynO PE=2 SV=2	12.244	12.073	11.893	12.064	12.459	11.102	11.097	11.291	11.461	11.614	0.560972	-0.834	0.001
554	CG1703, isoform A OS=Drosophila melanogaster GN=CG1703 PE=1 SV=1	9.858	9.833	9.897	9.988	9.881	10.134	10.083	9.949	10.173	10.065	1.14076	0.19	0.028
555	Golgi complex-localized glycoprotein 1, isoform A OS=Drosophila melanogaster GN=Glg1 PE=1 SV=2	9.553	9.635	9.593	9.566	9.421	9.779	9.727	9.666	9.739	9.692	1.12272	0.167	0.037
556	Uncharacterized protein, isoform I OS=Drosophila melanogaster GN=CG43143 PE=4 SV=1	9.653	9.599	9.595	9.593	9.383	9.553	9.508	9.382	9.391	9.413	0.923382	-0.115	0.202
557	3-hydroxyisobutyrate dehydrogenase OS=Drosophila melanogaster GN=CG15093 PE=1 SV=1	10.17	10.061	10.256	10.375	10.531	10.228	10.822	10.575	10.982	11.007	1.36037	0.444	0.044
558	Synapse-associated protein of 47 kDa OS=Drosophila melanogaster GN=Sap47 PE=1 SV=1	6.031	6.474	6.325	6.403	5.966	6.563	6.493	6.355	6.325	6.377	1.13524	0.183	0.211
559	CG8184, isoform H OS=Drosophila melanogaster GN=CG8184 PE=1 SV=1	8.802	8.765	8.848	8.764	8.723	8.914	8.756	8.661	8.912	8.796	1.01889	0.027	0.767
560	Eukaryotic initiation factor 4B OS=Drosophila melanogaster GN=eIF4B PE=1 SV=1	10.005	10.016	10.044	9.966	9.775	10.137	10.11	10.049	9.994	9.952	1.06216	0.087	0.34
561	Enigma OS=Drosophila melanogaster GN=Egm PE=1 SV=1	10.463	10.455	10.4	10.534	10.587	10.134	9.97	10.145	10.346	10.249	0.801625	-0.319	0.008
562	GH09271p OS=Drosophila melanogaster GN=kcc PE=1 SV=1	7.64	7.573	7.361	7.44	7.619	7.379	7.381	7.279	7.15	7.095	0.82932	-0.27	0.026
563	MIP34848p1 OS=Drosophila melanogaster GN=smp-30 PE=1 SV=1	9.304	9.21	9.19	9.489	9.888	9.81	10.88	10.328	10.777	11.013	2.21146	1.145	0.003
564	Enoyl-[acyl-carrier-protein] reductase, mitochondrial OS=Drosophila melanogaster GN=CG16935 PE=3 SV=2	10.713	10.61	10.585	10.769	11.216	9.792	10.324	10.268	10.728	10.85	0.765248	-0.386	0.157
565	3-hydroxyacyl-CoA dehydrogenase type-2 OS=Drosophila melanogaster GN=scu PE=1 SV=1	10.445	10.221	10.173	10.209	10.476	10.131	10.286	10.08	10.228	10.406	0.946714	-0.079	0.516
566	Glutathione S-transferase D1 OS=Drosophila melanogaster GN=GstD1 PE=1 SV=1	11.223	10.868	10.871	10.871	11.188	11.278	11.537	11.409	11.964	11.94	1.53901	0.622	0.008
567	Larval serum protein 1 gamma chain OS=Drosophila melanogaster GN=Lsp1gamma PE=2 SV=2	8.634	7.133	11.318	9.611	6.681	10.855	9.62	9.237	12.526	9.611	3.23777	1.695	0.177
568	CG5355 OS=Drosophila melanogaster GN=Dmel\CG5355 PE=1 SV=2	10.837	10.831	10.819	10.799	10.931	10.647	10.741	10.676	10.635	10.634	0.88454	-0.177	0.018
569	Multidrug resistance protein homolog 65 OS=Drosophila melanogaster GN=Mdr65 PE=1 SV=2	9.71	9.721	9.761	9.835	9.912	10.046	10.049	10.069	10.011	10.106	1.20414	0.268	0.004
570	Vacuolar H[+] ATPase 44kD subunit, isoform F OS=Drosophila melanogaster GN=Vha44 PE=1 SV=1	11.304	11.213	11.081	11.193	11.39	10.94	11.16	11.288	11.49	11.503	1.02811	0.04	0.813
571	Phosphoenolpyruvate carboxykinase [GTP] OS=Drosophila melanogaster GN=Pepck PE=2 SV=2	9.87	9.699	10.37	9.806	9.49	10.931	10.541	10.506	10.535	10.699	1.73628	0.796	0.002
572	Vig2, isoform B OS=Drosophila melanogaster GN=vig2 PE=1 SV=2	8.222	8.024	8.232	8.232	8.203	8.184	8.059	8.176	8.242	8.189	0.99103	-0.013	0.891
573	Maternal protein tudor OS=Drosophila melanogaster GN=tud PE=1 SV=2	9.108	9.082	9.058	9.133	8.984	9.395	9.336	9.327	9.582	9.484	1.27633	0.352	0.002
574	Signal recognition particle subunit SRP68 OS=Drosophila melanogaster GN=Srp68 PE=2 SV=1	10.373	10.454	10.363	10.378	10.222	10.394	10.352	10.25	10.412	10.32	0.991717	-0.012	0.891
575	Oxysterol-binding protein OS=Drosophila melanogaster GN=Osbp PE=1 SV=1	10.464	10.488	10.404	10.322	10.456	10.476	10.531	10.482	10.362	10.491	1.02954	0.042	0.594
576	26S proteasome regulatory complex subunit p97 OS=Drosophila melanogaster GN=Rpn1 PE=1 SV=2	11.051	10.987	11.026	11.046	11.012	10.951	10.864	10.916	11.114	10.954	0.956608	-0.064	0.408
577	Uncharacterized protein, isoform H OS=Drosophila melanogaster GN=c62E-15 PE=1 SV=1	5.364	5.306	5.041	5.232	4.926	4.855	4.398	4.311	4.662	4.188	0.619424	-0.691	0.003
578	CG1561 OS=Drosophila melanogaster GN=CG1561 PE=1 SV=1	10.22	10.256	10.107	10.183	10.19	10.316	10.298	10.326	10.41	10.475	1.12818	0.174	0.032
579	6-phosphofructo 2-kinase/fructose 2,6-bisphosphatase long form OS=Drosophila melanogaster GN=Pfrx PE=1 SV=2	10.234	10.347	10.134	10.216	10.496	9.994	10.234	10.255	10.212	10.335	0.946714	-0.079	0.507
580	Ribosomal protein L7A, isoform E OS=Drosophila melanogaster GN=RpL7A PE=4 SV=1	10.808	10.675	10.66	10.922	11.1	10.644	10.812	10.88	11.566	11.429	1.17528	0.233	0.345
581	Nervous wreck, isoform H OS=Drosophila melanogaster GN=nwk PE=1 SV=1	6.315	6.199	6.021	6.208	6.757	5.991	6.267	6.211	6.466	6.578	1.00208	0.003	0.99
582	Nervous wreck, isoform I OS=Drosophila melanogaster GN=nwk PE=1 SV=1	3.172	1.502	1.49	3.169	2.987	1.154	2.53	2.542	2.759	3.596	1.0367	0.052	0.95
583	FI19380p1 OS=Drosophila melanogaster GN=mfas PE=1 SV=1	10.361	10.357	10.213	10.182	10.482	10.384	10.821	10.914	10.47	10.863	1.29415	0.372	0.029
584	FI18749p1 OS=Drosophila melanogaster GN=GlyRS PE=1 SV=1	10.917	10.889	10.893	11.007	11.018	10.948	11.127	10.875	10.824	10.813	0.981459	-0.027	0.795
585	Probable cytochrome P450 6d5 OS=Drosophila melanogaster GN=Cyp6d5 PE=2 SV=1	11.178	11.094	10.739	10.894	11.323	10.579	11.008	10.904	10.64	10.983	0.856782	-0.223	0.202
586	Uncharacterized protein, isoform AE OS=Drosophila melanogaster GN=c62E-11 PE=1 SV=1	8.966	9.09	9.023	8.977	8.849	9.104	9.044	9.119	8.867	8.886	1.01607	0.023	0.831
587	CG8728 OS=Drosophila melanogaster GN=CG8728-RA PE=1 SV=1	10.179	10.136	10.066	10.174	10.218	10.154	9.873	10.167	10.229	10.3	0.993092	-0.01	0.939
588	CG9090, isoform A OS=Drosophila melanogaster GN=CG9090-RA PE=1 SV=1	11.489	11.461	11.237	11.412	11.691	10.134	9.696	10.392	10.507	10.585	0.436786	-1.195	0
589	Ubiquitin carboxyl-terminal hydrolase 64E OS=Drosophila melanogaster GN=Ubp64E PE=1 SV=2	10.027	10.022	10.198	10.099	9.698	10.421	10.036	9.951	10.207	9.922	1.07103	0.099	0.552
590	Putative apoptosis-inducing factor 1, mitochondrial OS=Drosophila melanogaster GN=AIF PE=2 SV=2	9.941	9.893	9.944	9.916	9.958	10.106	9.938	9.972	9.928	9.895	1.02598	0.037	0.628
591	AMP deaminase OS=Drosophila melanogaster GN=AMPdeam PE=1 SV=2	4.711	5.024	5.058	5.076	5.364	5.402	5.995	5.545	5.522	5.668	1.49485	0.58	0.007
592	LD12946p OS=Drosophila melanogaster GN=MSBP PE=1 SV=1	11.175	11.221	10.986	11.034	11.098	10.665	10.863	10.914	10.81	10.904	0.828171	-0.272	0.012
593	Glucose-6-phosphate 1-dehydrogenase OS=Drosophila melanogaster GN=Zw PE=1 SV=1	6.132	6.497	6.514	6.6	6.208	7.136	7.076	6.885	6.332	6.053	1.23628	0.306	0.286
594	LP19846p OS=Drosophila melanogaster GN=Ndg PE=1 SV=1	9.647	9.769	9.769	9.658	9.632	9.89	9.828	10.004	9.759	9.869	1.12896	0.175	0.046
595	GH13992p OS=Drosophila melanogaster GN=shrb PE=1 SV=1	10.612	10.494	10.508	10.484	10.636	10.56	10.654	10.555	10.496	10.551	1.01115	0.016	0.845
596	CG4199, isoform B OS=Drosophila melanogaster GN=EG:22E5.5 PE=1 SV=1	6.088	5.981	5.88	5.835	6.118	6.167	6.161	5.829	5.984	6.037	1.03886	0.055	0.648
597	Dynamin associated protein 160, isoform B OS=Drosophila melanogaster GN=Dap160 PE=1 SV=1	10.171	10.106	9.987	9.971	10.141	9.961	9.965	10.077	9.989	10.061	0.956608	-0.064	0.431
598	Heat shock protein 23, isoform B OS=Drosophila melanogaster GN=Hsp23 PE=3 SV=1	11.314	11.267	11.289	11.539	11.338	10.346	10.318	10.309	10.5	10.204	0.495171	-1.014	0
599	Flotillin 2, isoform J OS=Drosophila melanogaster GN=Flo2 PE=1 SV=1	10.089	10.101	10.04	10.172	10.325	10.176	10.296	10.286	10.423	10.358	1.11884	0.162	0.098
600	NUCB1 OS=Drosophila melanogaster GN=NUCB1 PE=1 SV=3	9.752	9.82	9.733	9.776	9.643	9.788	9.955	9.871	9.809	9.799	1.07177	0.1	0.197
601	CG6028 OS=Drosophila melanogaster GN=CG6028 PE=1 SV=1	10.48	10.356	10.261	10.512	10.908	10.274	10.853	10.572	10.669	10.856	1.10267	0.141	0.475
602	Target of rapamycin, isoform B OS=Drosophila melanogaster GN=Tor PE=1 SV=1	9.162	9.127	9.042	9.104	9.159	9.161	9.222	9.237	9.178	9.258	1.06585	0.092	0.168
603	RNA-binding protein cabeza OS=Drosophila melanogaster GN=caz PE=2 SV=2	9.629	9.613	9.543	9.537	9.42	9.761	9.684	9.915	9.125	9.203	0.992404	-0.011	0.967
604	Eukaryotic translation initiation factor 3 subunit L OS=Drosophila melanogaster GN=CG5642 PE=2 SV=1	10.521	10.442	10.507	10.561	10.43	10.557	10.419	10.421	10.801	10.652	1.05555	0.078	0.481
605	Ef1gamma, isoform C OS=Drosophila melanogaster GN=eEF1gamma PE=4 SV=1	10.771	10.637	10.68	10.793	10.697	10.617	10.658	10.556	10.928	10.769	0.993092	-0.01	0.936
606	Heterogeneous nuclear ribonucleoprotein K, isoform C OS=Drosophila melanogaster GN=HnRNP-K PE=1 SV=1	9.378	9.431	9.432	9.376	9.28	9.514	9.531	9.466	9.505	9.439	1.08073	0.112	0.111
607	Aminopeptidase OS=Drosophila melanogaster GN=CG31198 PE=1 SV=1	10.256	10.196	10.071	10.245	10.322	10.26	10.489	10.49	10.389	10.575	1.16716	0.223	0.037
608	Elongation factor 1-alpha OS=Drosophila melanogaster GN=eEF1alpha2 PE=1 SV=1	8.606	8.225	8.536	8.625	9.314	7.939	7.492	7.548	7.755	7.57	0.5	-1	0.001
609	Glutamine synthetase 1, mitochondrial OS=Drosophila melanogaster GN=Gs1 PE=2 SV=3	9.822	9.731	9.857	9.721	9.799	10.071	10.109	10.138	10.545	10.532	1.40737	0.493	0.004
610	Peroxiredoxin 2540-2 OS=Drosophila melanogaster GN=Prx2540-2 PE=1 SV=1	9.863	9.702	9.719	9.723	9.95	9.044	9.575	9.324	9.793	9.825	0.824162	-0.279	0.157
611	Basigin, isoform A OS=Drosophila melanogaster GN=Bsg PE=1 SV=1	5.479	5.294	5.513	5.578	5.378	5.413	5.427	5.604	5.542	5.32	1.00905	0.013	0.915
612	Heat shock protein 22 OS=Drosophila melanogaster GN=Hsp22 PE=1 SV=4	5.145	5.502	5.431	5.081	5.665	11.789	11.181	11.402	11.503	11.762	71.6056	6.162	0
613	Dek, isoform B OS=Drosophila melanogaster GN=Dek PE=1 SV=1	10.391	10.298	10.313	10.291	10.26	10.438	10.504	10.363	10.176	10.243	1.02385	0.034	0.743
614	CG5381, isoform A OS=Drosophila melanogaster GN=Dmel\CG5381 PE=4 SV=2	9.98	10.018	9.963	10.012	10.083	9.788	9.835	9.796	9.671	9.749	0.844401	-0.244	0.004
615	Glutamate dehydrogenase OS=Drosophila melanogaster GN=bb8 PE=1 SV=2	10.721	10.676	10.689	10.747	10.763	10.121	9.71	10.074	10.382	9.951	0.628071	-0.671	0.001
616	Phosphodiesterase OS=Drosophila melanogaster GN=dnc PE=1 SV=1	9.53	9.501	9.336	9.364	9.756	9.279	9.483	9.452	9.407	9.619	0.966606	-0.049	0.714
617	CG3961, isoform E OS=Drosophila melanogaster GN=Dmel\CG3961 PE=1 SV=1	10.453	10.355	10.337	10.339	10.434	10.412	10.227	10.288	10.52	10.449	0.997231	-0.004	0.971
618	Basigin, isoform J OS=Drosophila melanogaster GN=Bsg PE=1 SV=1	5.078	5.144	5.218	5.117	4.47	5.033	4.688	5.213	5.28	4.931	1.01677	0.024	0.925
619	Ced-6, isoform B OS=Drosophila melanogaster GN=ced-6 PE=1 SV=1	9.376	9.269	9.356	9.23	9.22	9.486	9.435	9.439	9.487	9.428	1.12039	0.164	0.03
620	RE23625p OS=Drosophila melanogaster GN=CG14207-RB PE=1 SV=1	8.172	8.128	8.095	8.053	8.01	7.657	7.987	7.902	7.716	8.084	0.857376	-0.222	0.067
621	CG7033 OS=Drosophila melanogaster GN=CCT2 PE=1 SV=2	10.565	10.466	10.625	10.574	10.426	10.383	10.283	10.311	10.577	10.368	0.903127	-0.147	0.127
622	CG9331, isoform C OS=Drosophila melanogaster GN=Dmel\CG9331 PE=1 SV=1	10.329	10.135	10.06	10.443	11.035	10.272	10.936	10.842	11.276	11.459	1.47121	0.557	0.096
623	Uncharacterized protein, isoform B OS=Drosophila melanogaster GN=CG10417 PE=1 SV=1	9.416	9.529	9.429	9.46	9.187	9.719	9.588	9.53	9.531	9.356	1.10267	0.141	0.22
624	Aminopeptidase OS=Drosophila melanogaster GN=CG32473-RC PE=1 SV=1	7.454	7.488	7.384	7.479	7.542	7.476	7.492	7.537	7.649	7.459	1.03742	0.053	0.496
625	Putative U5 small nuclear ribonucleoprotein 200 kDa helicase OS=Drosophila melanogaster GN=l(3)72Ab PE=2 SV=4	9.242	9.247	9.21	9.267	9.108	9.437	9.431	9.365	9.474	9.474	1.16554	0.221	0.007
626	RH40737p OS=Drosophila melanogaster GN=Dmel\CG11594 PE=1 SV=1	10.514	10.58	10.424	10.517	10.909	10.138	10.659	10.295	10.317	10.286	0.840896	-0.25	0.114
627	Protein kinase C, eye isozyme OS=Drosophila melanogaster GN=inaC PE=1 SV=1	10.662	10.719	10.492	10.551	10.977	10.639	10.643	10.664	10.604	10.595	0.965267	-0.051	0.681
628	Mutant tan OS=Drosophila melanogaster GN=t PE=1 SV=1	9.944	10.065	10.017	10.023	10.108	9.941	10.041	9.936	9.984	10.004	0.965936	-0.05	0.481
629	Unc-115a, isoform B OS=Drosophila melanogaster GN=Unc-115a PE=1 SV=1	9.027	9.522	9.331	9.487	9.526	9.311	9.624	9.844	9.72	9.883	1.22944	0.298	0.099
630	FI21437p1 OS=Drosophila melanogaster GN=eIF5B PE=1 SV=2	10.5	10.624	10.695	10.742	10.388	10.756	10.655	10.528	10.666	10.468	1.01748	0.025	0.848
631	Calcium/calmodulin-dependent protein kinase II, isoform J OS=Drosophila melanogaster GN=CaMKII PE=1 SV=1	7.26	7.601	7.573	7.181	6.967	7.673	7.773	7.855	7.653	7.792	1.35004	0.433	0.017
632	40S ribosomal protein S8 OS=Drosophila melanogaster GN=RpS8 PE=3 SV=1	10.208	10.084	10.093	10.18	10.121	10.168	10.306	10.285	10.505	10.481	1.15829	0.212	0.044
633	Amidophosphoribosyltransferase OS=Drosophila melanogaster GN=Prat2 PE=2 SV=1	10.094	10.151	9.832	10.137	10.671	9.421	10.124	9.747	10.048	9.906	0.79664	-0.328	0.157
634	Peptidylprolyl isomerase OS=Drosophila melanogaster GN=CG5482 PE=1 SV=1	10.525	10.527	10.439	10.478	10.393	10.451	10.434	10.404	10.361	10.356	0.951978	-0.071	0.301
635	V-type proton ATPase subunit E OS=Drosophila melanogaster GN=Vha26 PE=2 SV=1	10.293	10.339	10.222	10.292	10.435	10.126	10.336	10.367	10.369	10.422	1.00556	0.008	0.944
636	LD37516p OS=Drosophila melanogaster GN=CG11771 PE=1 SV=1	10.593	10.39	10.409	10.502	10.546	10.314	10.145	10.385	10.462	10.444	0.908778	-0.138	0.174
637	Uncharacterized protein, isoform A OS=Drosophila melanogaster GN=SmydA-9 PE=4 SV=1	11.101	11.064	10.949	11.177	11.25	10.896	10.882	11.099	11.251	11.305	0.984866	-0.022	0.888
638	Paxillin, isoform F OS=Drosophila melanogaster GN=Pax PE=1 SV=1	9.804	9.807	9.674	9.768	10.239	9.639	9.915	10.013	9.876	10.285	1.06216	0.087	0.648
639	Eb1, isoform A OS=Drosophila melanogaster GN=Eb1 PE=1 SV=1	7.368	7.184	7.459	7.431	7.011	7.166	7.371	7.388	7.097	7.326	0.985549	-0.021	0.891
640	CG4199, isoform A OS=Drosophila melanogaster GN=CG4199 PE=1 SV=3	3.58	3.937	3.705	4.006	2.584	4.18	4.243	4.016	3.458	3.011	1.16393	0.219	0.621
641	Uncharacterized protein, isoform D OS=Drosophila melanogaster GN=Dmel\CG18135 PE=1 SV=1	10.755	10.795	10.498	10.707	11.145	10.404	10.575	10.641	10.84	10.812	0.916369	-0.126	0.463
642	Sec23 ortholog, isoform E OS=Drosophila melanogaster GN=Sec23 PE=1 SV=1	9.718	9.774	9.778	9.771	9.6	9.662	9.701	9.784	9.891	9.707	1.01466	0.021	0.828
643	Glucosidase 2 beta subunit, isoform A OS=Drosophila melanogaster GN=GCS2beta PE=1 SV=1	9.523	9.589	9.498	9.481	9.434	9.508	9.696	9.603	9.515	9.561	1.05117	0.072	0.351
644	26S proteasome regulatory complex subunit p48B OS=Drosophila melanogaster GN=Rpt1 PE=1 SV=1	10.599	10.556	10.578	10.606	10.577	10.603	10.619	10.602	10.745	10.607	1.0367	0.052	0.442
645	FI17312p1 OS=Drosophila melanogaster GN=Mal-B2 PE=1 SV=1	10.964	10.874	10.765	10.814	11.404	10.108	10.873	10.45	10.47	10.644	0.72951	-0.455	0.043
646	GH04081p OS=Drosophila melanogaster GN=wupA PE=1 SV=1	10.342	10.822	10.901	10.673	11.108	10.14	10.109	10.489	10.171	10.533	0.716481	-0.481	0.026
647	AP complex subunit beta OS=Drosophila melanogaster GN=AP-1-2beta PE=1 SV=1	11.065	11.003	10.93	10.929	10.986	10.881	10.915	10.941	11.035	11	0.980779	-0.028	0.723
648	GEO07291p1 OS=Drosophila melanogaster GN=Obp99c PE=1 SV=1	9.012	8.975	9.219	9.019	8.716	9.763	9.695	9.786	9.959	9.928	1.78757	0.838	0
649	AT09773p OS=Drosophila melanogaster GN=Vha68-3 PE=2 SV=1	7.022	7.187	7.331	7.308	7.18	7.029	6.407	6.665	6.719	6.612	0.697855	-0.519	0.004
650	Bubblegum, isoform C OS=Drosophila melanogaster GN=bgm PE=1 SV=1	10.531	10.533	10.308	10.413	10.839	10.152	10.568	10.546	10.216	10.421	0.905006	-0.144	0.364
651	Uncharacterized protein, isoform E OS=Drosophila melanogaster GN=CG17816 PE=1 SV=1	9.49	9.477	9.395	9.455	9.687	9.249	9.291	9.351	9.249	9.342	0.867539	-0.205	0.028
652	GDI interacting protein 3, isoform B OS=Drosophila melanogaster GN=Gint3 PE=1 SV=1	9.304	9.34	9.323	9.387	9.288	9.197	9.183	9.146	9.041	9.174	0.882703	-0.18	0.019
653	Combover, isoform B OS=Drosophila melanogaster GN=cmb PE=1 SV=1	4.053	4.096	4.39	4.099	2.374	3.681	3.764	2.937	2.479	0.8	0.475989	-1.071	0.174
654	AMP deaminase OS=Drosophila melanogaster GN=AMPdeam PE=1 SV=1	6.104	6.161	5.933	6.124	6.214	5.611	5.444	5.804	6.067	5.874	0.786217	-0.347	0.033
655	GH12103p OS=Drosophila melanogaster GN=metro PE=1 SV=1	5.982	6.019	5.912	6.212	6.19	5.601	5.753	5.279	5.327	5.58	0.680657	-0.555	0.002
656	C12.2, isoform B OS=Drosophila melanogaster GN=c12.2 PE=1 SV=1	10.098	10.088	9.94	10.02	10.205	10.15	10.237	10.371	10.094	10.366	1.1274	0.173	0.099
657	Modulo, isoform C OS=Drosophila melanogaster GN=mod PE=1 SV=1	10.423	10.391	10.488	10.48	10.312	10.429	10.337	10.239	10.476	10.335	0.961927	-0.056	0.521
658	Ergic53, isoform A OS=Drosophila melanogaster GN=ergic53 PE=1 SV=1	10.057	10.073	10.084	10.044	9.924	9.873	9.996	9.894	9.966	9.941	0.931095	-0.103	0.157
659	Trehalase OS=Drosophila melanogaster GN=CG6262 PE=3 SV=1	8.583	8.647	8.374	8.397	8.443	8.971	8.531	8.848	8.869	8.442	1.18345	0.243	0.113
660	Multiple ankyrin repeats single KH domain, isoform C OS=Drosophila melanogaster GN=mask PE=4 SV=1	8.395	8.507	8.565	8.443	8.328	8.351	8.488	8.239	8.348	8.262	0.926588	-0.11	0.234
661	Phosphoethanolamine cytidylyltransferase, isoform D OS=Drosophila melanogaster GN=Pect PE=1 SV=2	5.577	5.808	5.557	5.771	5.779	5.547	5.839	5.829	5.283	5.724	0.963262	-0.054	0.743
662	Jabba, isoform C OS=Drosophila melanogaster GN=Jabba PE=1 SV=1	7.749	7.773	7.419	7.45	7.833	7.657	6.835	7.35	7.377	7.085	0.76631	-0.384	0.072
664	L-lactate dehydrogenase OS=Drosophila melanogaster GN=ImpL3 PE=2 SV=1	11.323	11.337	11.349	11.381	11.567	11.176	11.439	11.134	11.217	11.256	0.903127	-0.147	0.148
665	RE14391p OS=Drosophila melanogaster GN=Sec63 PE=1 SV=1	9.967	10.076	10.044	10.026	9.837	10.145	10.167	10.077	9.991	9.948	1.05336	0.075	0.415
666	Crossveinless d OS=Drosophila melanogaster GN=cv-d PE=1 SV=2	10.621	10.466	10.557	10.482	10.517	10.393	10.527	10.416	10.6	10.551	0.978742	-0.031	0.721
667	IP12247p OS=Drosophila melanogaster GN=CG18258 PE=2 SV=2	9.493	9.898	9.35	9.477	10.164	9.967	10.994	10.958	9.714	10.673	1.72309	0.785	0.045
668	Calpain-A, isoform D OS=Drosophila melanogaster GN=CalpA PE=1 SV=1	9.113	8.922	8.959	9.155	9.033	9.095	9.001	9.069	9.194	9.217	1.05629	0.079	0.393
669	LD46175p OS=Drosophila melanogaster GN=sea PE=1 SV=1	11.015	10.973	10.8	10.864	11.074	11.164	11.407	11.339	11.256	11.349	1.28165	0.358	0.003
670	Uncharacterized protein, isoform N OS=Drosophila melanogaster GN=Dmel\CG44085 PE=4 SV=1	9.966	9.507	9.632	9.479	9.439	9.398	9.327	9.413	9.593	9.52	0.898755	-0.154	0.275
671	Integrin alpha-PS2 OS=Drosophila melanogaster GN=if PE=1 SV=2	10.262	10.083	10.169	10.198	10.238	10.124	10.176	10.272	10.195	10.163	0.997231	-0.004	0.966
672	Burgundy, isoform B OS=Drosophila melanogaster GN=bur PE=1 SV=3	10.028	9.937	9.956	10.05	10.091	9.829	9.922	9.921	10.018	9.932	0.940826	-0.088	0.248
673	Calmodulin, isoform C OS=Drosophila melanogaster GN=Cam PE=1 SV=1	11.361	11.4	11.248	11.378	11.369	11.265	11.522	11.422	11.295	11.434	1.02527	0.036	0.691
674	Probable cytochrome P450 312a1 OS=Drosophila melanogaster GN=Cyp312a1 PE=2 SV=1	10.509	10.894	10.586	10.71	10.141	9.83	9.68	9.733	9.806	9.67	0.564874	-0.824	0
675	Probable arginine--tRNA ligase, cytoplasmic OS=Drosophila melanogaster GN=ArgRS PE=2 SV=1	10.219	10.325	10.31	10.364	10.12	10.648	10.554	10.461	10.54	10.413	1.19416	0.256	0.013
676	Aldose 1-epimerase OS=Drosophila melanogaster GN=BcDNA:GH08902 PE=1 SV=3	10.269	10.508	10.56	10.788	10.837	9.914	10.532	10.096	9.93	9.945	0.702709	-0.509	0.019
677	CG8844 protein OS=Drosophila melanogaster GN=ND-PDSW PE=1 SV=1	11.305	11.331	11.335	11.32	11.414	10.278	10.263	10.322	10.386	10.282	0.488016	-1.035	0
678	LD38919p OS=Drosophila melanogaster GN=Ubqn PE=1 SV=1	9.369	9.305	9.234	9.232	9.209	9.213	9.296	9.187	9.474	9.39	1.02954	0.042	0.668
679	Carnitine palmitoyltransferase I OS=Drosophila melanogaster GN=whd PE=1 SV=1	9.375	9.235	9.134	9.127	9.539	8.904	9.044	8.911	9.125	9.139	0.836246	-0.258	0.051
681	Probable cysteine desulfurase, mitochondrial OS=Drosophila melanogaster GN=CG12264 PE=2 SV=1	10.336	10.247	10.126	10.222	10.395	10.124	9.96	10.136	10.318	10.317	0.936921	-0.094	0.412
682	Sphingosine-1-phosphate lyase OS=Drosophila melanogaster GN=Sply PE=2 SV=1	10.341	10.424	10.123	10.285	10.484	10.47	10.574	10.647	10.929	10.838	1.28343	0.36	0.019
683	AMP deaminase OS=Drosophila melanogaster GN=AMPdeam PE=1 SV=4	4.726	4.912	4.812	4.702	4.779	5	5.172	5.127	4.849	5.011	1.18591	0.246	0.024
684	LD10783p OS=Drosophila melanogaster GN=ScpX PE=1 SV=1	9.344	9.051	9.014	9.21	9.298	9.133	9.111	9.058	9.217	9.129	0.963262	-0.054	0.612
685	GH01829p OS=Drosophila melanogaster GN=Tep2 PE=1 SV=1	10.343	10.008	10.868	10.037	10.128	10.43	10.508	9.976	10.442	9.988	0.99447	-0.008	0.981
686	Lysine ketoglutarate reductase/saccharopine dehydrogenase, isoform A OS=Drosophila melanogaster GN=LKRSDH PE=1 SV=2	9.128	9.19	9.302	9.163	9.513	9.634	9.946	9.784	9.743	9.795	1.43495	0.521	0.001
687	CG8475, isoform C OS=Drosophila melanogaster GN=Dmel\CG8475 PE=4 SV=1	9.961	9.967	9.804	9.886	10.017	9.174	9.088	9.171	9.274	9.269	0.602069	-0.732	0
688	Uncharacterized protein OS=Drosophila melanogaster GN=CG14526 PE=4 SV=2	9.057	9.002	9.005	8.938	9.278	8.985	9.091	9.157	9.213	9.314	1.06881	0.096	0.395
689	NADH dehydrogenase (Ubiquinone) 39 kDa subunit, isoform A OS=Drosophila melanogaster GN=ND-39 PE=1 SV=1	10.891	10.658	10.585	10.702	10.927	9.26	9.269	9.46	9.663	9.623	0.406972	-1.297	0
690	LD22577p OS=Drosophila melanogaster GN=Uba2 PE=1 SV=1	10.672	10.635	10.621	10.666	10.588	10.287	10.227	10.134	10.162	10.077	0.72749	-0.459	0
691	Nervana 2, isoform F OS=Drosophila melanogaster GN=nrv2 PE=1 SV=1	8.281	8.094	7.987	7.959	8.399	8.007	8.224	8.343	8.324	8.493	1.09733	0.134	0.38
692	Cytochrome c oxidase subunit 5A, mitochondrial OS=Drosophila melanogaster GN=COX5A PE=2 SV=2	12.019	12.032	11.731	11.795	12.193	10.242	10.322	10.52	10.672	10.817	0.368823	-1.439	0
693	Without children, isoform B OS=Drosophila melanogaster GN=woc PE=1 SV=1	9.161	9.089	9.028	9.075	9.151	9.126	9.042	8.985	9.101	9.065	0.97468	-0.037	0.616
694	Rho GTPase activating protein at 1A, isoform E OS=Drosophila melanogaster GN=RhoGAP1A PE=1 SV=1	9.174	9.113	9.032	9.045	9.118	10.003	10.014	10.007	9.93	10.006	1.8609	0.896	0
695	CLIP-associating protein OS=Drosophila melanogaster GN=chb PE=1 SV=1	9.234	9.216	9.246	9.184	9.134	9.382	9.198	9.105	9.256	9.165	1.01326	0.019	0.844
696	Rabconnectin-3B, isoform A OS=Drosophila melanogaster GN=Rbcn-3B PE=1 SV=1	10.103	10.099	9.979	9.984	10.224	10.098	10.227	10.159	10.173	10.183	1.06437	0.09	0.278
697	GH12714p OS=Drosophila melanogaster GN=PpD3 PE=1 SV=1	9.988	9.961	10.019	10.076	9.899	9.993	9.888	9.834	9.944	9.801	0.934975	-0.097	0.225
698	Uncharacterized protein, isoform A OS=Drosophila melanogaster GN=BG:DS01759.2 PE=1 SV=1	9.382	8.536	9.774	8.797	9.324	9.296	9.623	9.468	9.847	9.799	1.36037	0.444	0.14
699	Putative uncharacterized protein OS=Drosophila melanogaster GN=wal PE=1 SV=1	11.212	11.091	10.946	11.187	11.556	10.521	11.201	11.294	11.283	11.549	0.980099	-0.029	0.919
700	Nuclear protein localization protein 4 homolog OS=Drosophila melanogaster GN=Npl4 PE=1 SV=3	10.186	10.243	10.235	10.183	10.122	10.258	10.107	10.107	10.105	10.036	0.951978	-0.071	0.352
701	Alkaline phosphatase 4 OS=Drosophila melanogaster GN=Aph4 PE=2 SV=3	9.85	10.047	9.85	10.143	9.976	9.222	9.461	9.581	9.42	9.589	0.697855	-0.519	0.001
702	Chitinase-like protein CG5210 OS=Drosophila melanogaster GN=CG5210 PE=1 SV=2	10.568	10.564	10.622	10.46	10.794	10.48	10.714	10.51	10.629	10.636	0.99447	-0.008	0.948
704	Ribosomal protein L7, isoform B OS=Drosophila melanogaster GN=RpL7 PE=4 SV=1	10.324	10.318	10.389	10.446	10.177	10.575	10.563	10.375	10.555	10.261	1.09809	0.135	0.218
705	LD15904p OS=Drosophila melanogaster GN=pzg PE=1 SV=1	10.017	10.02	9.977	10.141	10.024	10.172	10.068	10.118	10.068	10.12	1.0519	0.073	0.296
706	Phenylalanine--tRNA ligase beta subunit OS=Drosophila melanogaster GN=beta-PheRS PE=1 SV=1	10.686	10.616	10.571	10.698	10.809	10.322	10.209	10.199	10.437	10.422	0.780245	-0.358	0.003
707	Translationally-controlled tumor protein homolog OS=Drosophila melanogaster GN=Tctp PE=1 SV=1	10.148	10.028	10.06	10.191	10.18	9.882	10.015	9.965	10.402	10.263	0.988971	-0.016	0.919
708	DNA damage-binding protein 1 OS=Drosophila melanogaster GN=pic PE=1 SV=1	9.957	9.927	9.844	9.945	9.904	9.955	9.826	9.835	9.99	9.875	0.986917	-0.019	0.814
709	Menage a trois, isoform D OS=Drosophila melanogaster GN=metro PE=1 SV=1	5.102	5.317	5.264	5.439	5.47	5.197	4.747	5.205	5.029	4.986	0.820173	-0.286	0.052
710	CG3164, isoform B OS=Drosophila melanogaster GN=BEST:CK02656 PE=1 SV=2	9.921	9.917	9.789	9.715	9.732	9.984	9.973	9.879	9.781	9.858	1.05702	0.08	0.376
711	Flightin OS=Drosophila melanogaster GN=fln PE=2 SV=1	10.916	10.551	10.604	10.628	10.491	10.743	10.388	10.429	10.646	10.855	0.98214	-0.026	0.883
712	FI05490p OS=Drosophila melanogaster GN=Sara PE=1 SV=1	8.092	8.113	8.118	8.115	8.088	8.287	8.315	8.292	8.195	8.294	1.12662	0.172	0.015
713	Eb1, isoform F OS=Drosophila melanogaster GN=Eb1 PE=1 SV=2	8.279	8.244	8.201	8.1	8.251	8.262	8.309	8.257	8.101	8.341	1.0274	0.039	0.663
714	LD11581p OS=Drosophila melanogaster GN=Pmp70 PE=1 SV=2	10.08	10.129	9.784	9.914	9.841	9.763	9.743	9.792	9.739	9.855	0.888227	-0.171	0.1
715	D-Importin 7/RanBP7 OS=Drosophila melanogaster GN=msk PE=1 SV=1	10.22	10.231	10.179	10.168	10.285	10.268	10.244	10.196	10.32	10.197	1.0196	0.028	0.694
716	Signal recognition particle receptor subunit alpha homolog OS=Drosophila melanogaster GN=Gtp-bp PE=1 SV=2	10.036	10.101	10.129	10.008	9.904	10.206	10.265	10.169	10.077	10.155	1.10114	0.139	0.1
717	Mi-2, isoform B OS=Drosophila melanogaster GN=Mi-2 PE=1 SV=1	9.329	9.368	9.384	9.414	9.216	9.507	9.528	9.481	9.412	9.268	1.06955	0.097	0.283
718	CG5023 OS=Drosophila melanogaster GN=CG5023 PE=1 SV=1	10.537	10.487	10.441	10.432	10.819	10.243	10.408	10.523	10.25	10.518	0.898132	-0.155	0.225
719	GH12731p OS=Drosophila melanogaster GN=Gfat2 PE=1 SV=1	10.011	9.912	10.072	10.036	9.827	10.414	10.69	10.602	10.767	10.771	1.59881	0.677	0
720	CD98 heavy chain, isoform D OS=Drosophila melanogaster GN=CD98hc PE=1 SV=1	10.384	10.255	10.233	10.28	10.256	10.231	10.316	10.22	10.433	10.305	1.01396	0.02	0.825
721	Uncharacterized protein, isoform B OS=Drosophila melanogaster GN=CG31075 PE=1 SV=1	10.69	10.8	10.924	11.008	10.732	5.669	5.361	5.727	5.735	5.714	0.0274129	-5.189	0
722	Cullin 2, isoform A OS=Drosophila melanogaster GN=Cul2 PE=1 SV=3	9.938	9.917	9.946	9.957	9.84	9.982	9.681	9.737	9.932	9.755	0.93174	-0.102	0.28
723	Guanine nucleotide-binding protein subunit beta-2 OS=Drosophila melanogaster GN=Gbeta76C PE=1 SV=3	11.423	11.38	11.252	11.292	11.691	10.816	11.013	11.134	11.169	11.304	0.800515	-0.321	0.04
724	26S proteasome regulatory subunit 8 OS=Drosophila melanogaster GN=Rpt6 PE=1 SV=2	9.914	9.925	9.97	10.185	9.956	9.548	9.758	9.5	9.705	9.674	0.782954	-0.353	0.004
725	Glucose dehydrogenase [FAD, quinone] OS=Drosophila melanogaster GN=Gld PE=3 SV=3	10.048	10.373	10.267	10.231	10.454	10.218	10.667	10.629	10.076	10.551	1.11265	0.154	0.381
726	Sodium chloride cotransporter 69, isoform E OS=Drosophila melanogaster GN=Ncc69 PE=1 SV=1	9.43	9.489	9.406	9.429	9.687	9.506	9.551	9.555	9.344	9.613	1.01748	0.025	0.822
727	GH23180p OS=Drosophila melanogaster GN=Pect PE=1 SV=2	3.752	3.907	3.959	4.228	3.656	4.588	3.706	3.682	4.117	3.482	1.01045	0.015	0.967
728	FI21225p1 OS=Drosophila melanogaster GN=unc-45 PE=1 SV=1	10.002	9.909	9.937	10.084	9.476	10.309	10.053	9.79	10.24	10.038	1.15269	0.205	0.249
729	cAMP-dependent protein kinase catalytic subunit OS=Drosophila melanogaster GN=Pka-C1 PE=1 SV=3	10.546	10.587	10.459	10.477	10.498	10.538	10.398	10.438	10.311	10.373	0.93174	-0.102	0.192
730	Alpha-amylase A OS=Drosophila melanogaster GN=Amy-p PE=2 SV=1	10.348	10.181	11.83	9.962	9.889	8.63	9.668	8.364	8.916	8.8	0.337744	-1.566	0.008
731	Ubiquitin-40S ribosomal protein S27a OS=Drosophila melanogaster GN=RpS27A PE=1 SV=2	11.41	11.28	11.185	11.235	11.331	11.375	11.573	11.466	11.314	11.588	1.12896	0.175	0.083
732	Phosphatidylinositol 4-kinase III alpha, isoform D OS=Drosophila melanogaster GN=PI4KIIIalpha PE=1 SV=1	9.262	9.314	9.165	9.138	9.316	9.312	9.229	9.22	9.166	9.283	1.00208	0.003	0.977
733	RNA-binding protein 2, isoform D OS=Drosophila melanogaster GN=eIF4H1 PE=1 SV=1	10.157	9.995	9.963	9.899	9.977	9.72	9.724	9.854	9.875	9.789	0.866938	-0.206	0.027
734	LD46723p OS=Drosophila melanogaster GN=Lmpt PE=1 SV=2	6.533	6.674	6.6	6.605	6.383	7.04	7.07	7.089	6.833	6.878	1.34071	0.423	0.002
735	NADH dehydrogenase [ubiquinone] 1 alpha subcomplex subunit 10, mitochondrial OS=Drosophila melanogaster GN=ND-42 PE=1 SV=1	11.326	11.078	11.074	11.124	11.44	9.507	9.551	9.727	10.214	10.031	0.378142	-1.403	0
736	DNA repair protein Rad23 OS=Drosophila melanogaster GN=Rad23 PE=1 SV=1	9.016	9.032	9.025	9.068	9	8.772	8.786	8.767	8.805	8.775	0.842647	-0.247	0.001
737	Annexin B10 OS=Drosophila melanogaster GN=AnxB10 PE=2 SV=3	10.573	10.435	10.482	10.442	10.401	10.231	10.411	10.316	10.331	10.325	0.905006	-0.144	0.066
738	Mf5 protein OS=Drosophila melanogaster GN=Mf PE=1 SV=2	10.719	10.653	10.441	10.399	10.943	10.12	10.377	10.554	10.131	10.552	0.821311	-0.284	0.111
739	Calcium/calmodulin-dependent protein kinase II, isoform L OS=Drosophila melanogaster GN=CaMKII PE=1 SV=1	5.049	5.105	5.023	4.957	4.779	5.476	5.33	5.006	5.131	5.256	1.19499	0.257	0.06
740	Ensconsin, isoform F OS=Drosophila melanogaster GN=ens PE=1 SV=1	10.221	10.181	10.186	10.109	10.019	10.205	10.284	10.15	9.99	10.006	0.988971	-0.016	0.886
741	Integrin alpha-PS3 OS=Drosophila melanogaster GN=scb PE=1 SV=2	9.518	9.311	9.642	9.297	9.307	9.529	9.594	9.532	9.564	9.559	1.10267	0.141	0.174
742	FI02842p OS=Drosophila melanogaster GN=Lmpt PE=1 SV=2	4.078	4.496	4.689	4.277	4.615	4.907	4.852	4.657	4.426	4.523	1.18263	0.242	0.19
743	Ferritin OS=Drosophila melanogaster GN=Fer1HCH PE=1 SV=1	8.206	8.066	8.005	8.039	8.363	9.167	9.387	9.054	9.405	9.304	2.18556	1.128	0
744	ADP-ribosylation factor GTPase activating protein 3, isoform H OS=Drosophila melanogaster GN=ArfGAP3 PE=1 SV=2	9.947	9.976	9.935	9.911	9.894	10.028	10.131	9.974	10.129	10.134	1.1065	0.146	0.051
745	Muscle LIM protein at 60A, isoform B OS=Drosophila melanogaster GN=Mlp60A PE=1 SV=1	8.71	9.345	9.146	9.234	8.848	8.563	7.926	8.662	8.46	8.712	0.663423	-0.592	0.02
746	Transforming acidic coiled-coil protein, isoform K OS=Drosophila melanogaster GN=tacc PE=1 SV=1	5.666	5.672	5.711	5.525	5.624	6.068	5.948	5.924	5.689	5.459	1.13131	0.178	0.231
747	Aminopeptidase OS=Drosophila melanogaster GN=CG5839 PE=1 SV=1	10.209	10.261	9.951	10.137	10.255	10.776	10.848	11.001	10.921	11.123	1.70645	0.771	0
748	Synapse-associated protein 47kD, isoform K OS=Drosophila melanogaster GN=Sap47 PE=1 SV=1	5.947	6.479	6.12	6.388	6.237	6.478	6.453	6.55	6.101	6.116	1.07624	0.106	0.551
749	FI17138p1 OS=Drosophila melanogaster GN=spag PE=1 SV=1	10.084	10.09	10.174	10.166	10.051	10.122	10.13	10.104	10.029	9.833	0.953299	-0.069	0.461
750	Fat-body protein 1 OS=Drosophila melanogaster GN=Fbp1 PE=2 SV=2	8.224	5.75	11.878	9.203	5.952	10.763	8.803	7.716	12.064	7.968	2.39662	1.261	0.465
751	Not1, isoform H OS=Drosophila melanogaster GN=Not1 PE=1 SV=1	9.885	9.925	9.981	9.972	9.893	10.181	10.03	9.979	10.169	9.986	1.10038	0.138	0.098
752	Adenosylhomocysteinase OS=Drosophila melanogaster GN=AhcyL1 PE=1 SV=1	10.115	10.165	10.031	10.041	10.072	10.18	10.258	10.258	10.12	10.162	1.07998	0.111	0.128
753	Zinc-finger protein at 72D, isoform B OS=Drosophila melanogaster GN=Zn72D PE=1 SV=1	9.687	9.754	9.721	9.75	9.759	9.681	9.721	9.688	9.588	9.648	0.953299	-0.069	0.288
754	JNK-interacting protein 3 OS=Drosophila melanogaster GN=syd PE=1 SV=1	9.184	9.272	9.224	9.185	9.025	9.324	9.353	9.24	9.212	9.353	1.08598	0.119	0.159
755	Protein sly1 homolog OS=Drosophila melanogaster GN=Slh PE=2 SV=4	10.187	10.102	9.997	9.952	9.971	9.87	9.924	9.942	10.12	10.049	0.958599	-0.061	0.532
756	Uncharacterized protein OS=Drosophila melanogaster GN=CG31548 PE=1 SV=1	10.195	10.179	10.105	10.203	10.508	10.249	10.72	10.506	10.418	10.652	1.20664	0.271	0.068
757	LP08774p OS=Drosophila melanogaster GN=Usp14 PE=1 SV=1	10.109	10.074	10.144	10.078	9.931	10.344	10.284	10.233	10.327	10.184	1.15429	0.207	0.019
758	Vermiform, isoform I OS=Drosophila melanogaster GN=verm PE=1 SV=1	6.488	6.446	6.484	6.626	5.516	6.936	6.179	6.332	6.812	5.95	1.09429	0.13	0.72
759	BcDNA.GH02678 OS=Drosophila melanogaster GN=Vps4 PE=1 SV=1	10.849	10.829	10.777	10.788	10.91	10.686	10.853	10.784	10.74	10.81	0.961927	-0.056	0.445
760	J domain-containing protein OS=Drosophila melanogaster GN=jdp PE=2 SV=2	9.897	9.904	9.777	9.891	10.321	9.737	9.913	10.164	10.219	10.423	1.09657	0.133	0.496
761	Uncharacterized protein, isoform C OS=Drosophila melanogaster GN=CG42258 PE=1 SV=2	8.969	9.039	8.99	9.111	9.226	8.788	8.919	8.807	8.646	8.674	0.812252	-0.3	0.009
762	Eukaryotic translation initiation factor 3 subunit J OS=Drosophila melanogaster GN=eIF3j PE=3 SV=1	10.305	10.202	10.258	10.309	10.4	10.148	10.271	10.27	10.414	10.443	1.00975	0.014	0.893
763	Uncharacterized protein, isoform C OS=Drosophila melanogaster GN=CG42492 PE=1 SV=1	6.875	6.921	6.633	6.871	6.767	6.831	6.759	6.788	6.652	6.685	0.952638	-0.07	0.458
764	Insulin-degrading enzyme OS=Drosophila melanogaster GN=Ide PE=1 SV=4	10.016	10.045	10.002	9.974	9.995	9.987	9.847	9.954	10.024	10.003	0.970634	-0.043	0.543
765	Heterogeneous nuclear ribonucleoprotein 27C OS=Drosophila melanogaster GN=Hrb27C PE=1 SV=2	9.564	9.45	9.522	9.442	9.485	9.396	9.453	9.448	9.537	9.462	0.976709	-0.034	0.641
766	Phosphatidylinositol-binding clathrin assembly protein LAP OS=Drosophila melanogaster GN=lap PE=1 SV=3	6.118	6.47	6.298	6.343	6.374	5.852	6.061	5.992	5.97	5.691	0.753667	-0.408	0.004
767	FI04125p OS=Drosophila melanogaster GN=nrv1 PE=1 SV=1	10.272	10.054	9.897	10.019	10.564	9.663	9.956	9.894	9.966	10.29	0.866337	-0.207	0.287
768	Mitochondrial import inner membrane translocase subunit TIM44 OS=Drosophila melanogaster GN=CG11779 PE=1 SV=1	10.523	10.471	10.563	10.515	10.438	10.28	10.041	10.223	10.132	10.156	0.792235	-0.336	0.001
769	Like-AP180, isoform D OS=Drosophila melanogaster GN=lap PE=1 SV=1	4.737	4.612	4.56	4.421	4.225	4.316	4.664	4.365	4.124	4.217	0.886382	-0.174	0.287
770	Synaptosomal-associated protein 25 OS=Drosophila melanogaster GN=Snap25 PE=2 SV=1	9.678	9.364	9.272	9.338	9.713	9.359	9.462	9.675	9.438	9.715	1.0403	0.057	0.726
771	CG1737, isoform A OS=Drosophila melanogaster GN=CG1737-RA PE=1 SV=1	8.42	8.412	8.503	8.528	8.062	8.653	8.663	8.525	8.471	8.481	1.1274	0.173	0.172
772	Histone deacetylase Rpd3 OS=Drosophila melanogaster GN=Rpd3 PE=1 SV=2	8.341	8.289	8.438	8.341	8.192	8.383	8.106	8.152	8.081	7.963	0.880869	-0.183	0.108
773	Keratin, type I cytoskeletal 9 OS=Homo sapiens GN=KRT9 PE=1 SV=3	8.886	9.519	7.864	7.928	8.669	11.608	8.18	7.758	8.306	7.401	1.05482	0.077	0.949
774	Microtubule-associated protein OS=Drosophila melanogaster GN=tau PE=1 SV=1	5.049	4.932	4.677	5.044	4.983	5.01	5.142	5.035	5.043	4.914	1.06511	0.091	0.406
775	Kruppel homolog 2, isoform C OS=Drosophila melanogaster GN=Kr-h2 PE=1 SV=1	10.15	9.831	9.781	9.794	9.896	9.891	9.982	9.896	9.903	10.183	1.05775	0.081	0.511
776	IGF-II mRNA-binding protein, isoform K OS=Drosophila melanogaster GN=Imp PE=1 SV=2	7.35	7.29	7.356	7.308	7.341	7.491	7.535	7.515	7.383	7.31	1.08523	0.118	0.138
777	Relative of woc, isoform C OS=Drosophila melanogaster GN=row PE=1 SV=1	9.536	9.521	9.538	9.467	9.494	9.66	9.553	9.539	9.614	9.631	1.0629	0.088	0.179
778	CG6726, isoform A OS=Drosophila melanogaster GN=CG6726 PE=1 SV=2	10.838	10.868	10.71	10.941	11.15	10.038	10.598	10.553	10.679	10.841	0.779165	-0.36	0.072
779	Microtubule-associated protein OS=Drosophila melanogaster GN=tau PE=1 SV=1	5.024	4.271	4.765	5.058	5.584	3.582	4.283	3.682	4.662	4.691	0.590496	-0.76	0.059
780	GH11341p OS=Drosophila melanogaster GN=Rpn5 PE=1 SV=1	10.66	10.605	10.593	10.631	10.609	10.54	10.553	10.492	10.709	10.589	0.970634	-0.043	0.573
781	Heterogeneous nuclear ribonucleoprotein at 98DE, isoform F OS=Drosophila melanogaster GN=Hrb98DE PE=1 SV=1	8.736	8.571	8.526	8.396	8.552	8.358	8.399	8.406	8.348	8.252	0.86814	-0.204	0.039
782	CG5787, isoform A OS=Drosophila melanogaster GN=Dmel\CG5787 PE=1 SV=2	9.633	9.646	9.569	9.36	9.433	9.795	9.646	9.605	9.489	9.519	1.05848	0.082	0.462
783	GH11113p OS=Drosophila melanogaster GN=Galk PE=1 SV=1	10.556	10.361	10.484	10.447	10.989	9.449	9.785	9.369	9.712	9.432	0.4938	-1.018	0
784	Inositol 1,4,5-trisphosphate receptor OS=Drosophila melanogaster GN=Itp-r83A PE=2 SV=3	9.367	9.459	9.362	9.34	9.47	9.753	9.728	9.623	9.542	9.594	1.18756	0.248	0.008
785	Leucyl-tRNA synthetase, isoform A OS=Drosophila melanogaster GN=LeuRS PE=1 SV=2	10.596	10.646	10.637	10.654	10.434	10.984	10.863	10.744	10.958	10.84	1.21757	0.284	0.008
786	CG3699 OS=Drosophila melanogaster GN=EG:BACR7A4.14 PE=1 SV=1	9.73	9.795	9.794	10.027	10.206	10.064	10.715	10.341	10.798	10.843	1.56049	0.642	0.01
787	Glutathione synthetase OS=Drosophila melanogaster GN=GSS PE=1 SV=2	6.627	6.906	7.066	7.174	6.943	7.718	7.909	7.827	8.319	7.822	1.967	0.976	0
788	Dynactin subunit 2 OS=Drosophila melanogaster GN=DCTN2-p50 PE=1 SV=1	10.66	10.474	10.499	10.57	10.757	10.12	10.382	10.278	10.519	10.599	0.86334	-0.212	0.117
789	ATP binding cassette subfamily B member 7, isoform B OS=Drosophila melanogaster GN=ABCB7 PE=1 SV=1	9.775	9.763	9.619	9.682	9.878	9.91	9.946	10.029	9.948	10.05	1.17528	0.233	0.014
790	Glutamate-cysteine ligase catalytic subunit, isoform B OS=Drosophila melanogaster GN=Gclc PE=1 SV=1	10.631	10.635	10.622	10.616	10.6	10.691	10.991	10.735	10.72	10.845	1.12975	0.176	0.056
791	CG9281, isoform B OS=Drosophila melanogaster GN=CG9281 PE=1 SV=1	10.825	10.748	10.883	10.866	10.524	10.856	10.617	10.667	10.85	10.573	0.961261	-0.057	0.656
792	Serpin 28F OS=Drosophila melanogaster GN=Spn28F PE=3 SV=2	11.059	11.29	11.008	11.121	11.751	10.156	10.924	10.917	10.273	10.896	0.653836	-0.613	0.034
793	Proteasome subunit alpha type OS=Drosophila melanogaster GN=CG30382 PE=1 SV=1	10.653	10.834	10.604	10.825	10.726	10.61	10.787	10.747	10.885	10.779	1.02314	0.033	0.747
794	cAMP-dependent protein kinase type II regulatory subunit OS=Drosophila melanogaster GN=Pka-R2 PE=1 SV=2	10.75	10.71	10.583	10.602	10.741	10.451	10.477	10.484	10.491	10.553	0.87904	-0.186	0.022
795	LD21067p OS=Drosophila melanogaster GN=PAPLA1 PE=1 SV=1	9.755	9.81	9.773	9.726	9.696	9.862	9.971	9.777	9.802	9.724	1.05336	0.075	0.349
796	CG7546, isoform E OS=Drosophila melanogaster GN=anon-EST:Liang-2.45 PE=1 SV=1	9.59	9.546	9.648	9.664	9.575	9.45	9.561	9.461	9.567	9.586	0.946714	-0.079	0.271
797	Cytochrome c proximal, isoform B OS=Drosophila melanogaster GN=Cyt-c-p PE=2 SV=1	10.919	10.895	10.505	11.135	11.608	9.823	9.976	10.516	10.778	11.012	0.663423	-0.592	0.102
798	IP16409p OS=Drosophila melanogaster GN=scf PE=1 SV=2	10.111	10.202	10.414	10.295	10.17	10.356	10.392	10.31	10.275	10.161	1.04319	0.061	0.547
799	CG3760, isoform C OS=Drosophila melanogaster GN=CG3760-RB PE=1 SV=1	4.625	4.294	4.191	4.245	4.826	3.632	3.694	3.488	4.338	4.459	0.700278	-0.514	0.082
800	Mini spindles, isoform D OS=Drosophila melanogaster GN=msps PE=1 SV=1	9.622	9.585	9.7	9.566	9.445	9.81	9.707	9.7	9.711	9.546	1.07998	0.111	0.225
801	Jabba, isoform B OS=Drosophila melanogaster GN=Jabba PE=1 SV=1	5.106	5.148	4.833	5.058	5.569	4.704	4.67	4.781	4.841	4.546	0.740207	-0.434	0.019
802	CG3499, isoform C OS=Drosophila melanogaster GN=YME1L PE=1 SV=1	10.611	10.543	10.535	10.584	10.494	10.331	10.207	10.369	10.353	10.272	0.842647	-0.247	0.004
803	FI03495p OS=Drosophila melanogaster GN=Tom70 PE=1 SV=2	10.373	10.145	10.253	10.322	10.489	9.651	9.505	9.674	9.995	9.81	0.664804	-0.589	0.001
804	Odorant-binding protein 44a, isoform A OS=Drosophila melanogaster GN=Obp44a PE=1 SV=1	10.881	10.858	10.818	10.932	11.01	10.817	10.725	10.964	11.116	11.015	1.0196	0.028	0.819
805	Cysteine--tRNA ligase, cytoplasmic OS=Drosophila melanogaster GN=CysRS PE=1 SV=1	9.801	9.773	9.775	9.795	9.734	9.751	9.718	9.749	9.833	9.778	0.993092	-0.01	0.89
806	Serine/threonine-protein phosphatase 2B catalytic subunit 1 OS=Drosophila melanogaster GN=CanA1 PE=2 SV=2	8.828	8.826	8.943	8.93	8.652	8.35	8.052	8.3	8.126	8.133	0.64038	-0.643	0
807	Uncharacterized protein, isoform A OS=Drosophila melanogaster GN=BEST:CK00496 PE=1 SV=1	10.174	10.191	10.243	10.198	10.142	10.284	10.261	10.133	10.356	10.21	1.04247	0.06	0.433
808	Angiotensin-converting enzyme-related protein OS=Drosophila melanogaster GN=Acer PE=1 SV=1	10.467	10.395	10.139	10.133	10.618	10.083	10.187	10.393	10.175	10.24	0.91067	-0.135	0.342
809	Accessory gland protein 76A, isoform B OS=Drosophila melanogaster GN=Acp76A PE=1 SV=1	10.564	10.819	10.386	10.633	11	9.583	10.383	10.286	9.749	10.199	0.641713	-0.64	0.015
810	60S ribosomal protein L22 OS=Drosophila melanogaster GN=RpL22 PE=1 SV=2	10.977	10.943	10.915	11.025	10.962	10.829	10.881	10.521	10.843	10.642	0.857971	-0.221	0.043
811	40S ribosomal protein S4 OS=Drosophila melanogaster GN=RpS4 PE=1 SV=2	10.403	10.435	10.425	10.526	10.353	10.588	10.522	10.476	10.794	10.576	1.11961	0.163	0.089
812	PDGF-and VEGF-receptor related, isoform J OS=Drosophila melanogaster GN=Pvr PE=1 SV=1	9.601	9.473	9.533	9.477	9.62	9.174	9.119	9.197	9.346	9.174	0.790589	-0.339	0.001
813	Uncharacterized protein OS=Drosophila melanogaster GN=CT34810 PE=4 SV=3	9.111	9.105	9.044	9.004	9.252	8.793	8.957	8.994	8.842	9.06	0.886382	-0.174	0.08
814	Myosin regulatory light chain 2 OS=Drosophila melanogaster GN=Mlc2 PE=1 SV=2	10.664	10.554	10.589	10.598	11.036	10.394	10.374	10.469	10.182	10.45	0.804408	-0.314	0.031
815	Glutamate decarboxylase OS=Drosophila melanogaster GN=Gad1 PE=2 SV=2	10.976	10.875	10.793	10.781	10.975	10.723	10.792	10.734	10.66	10.792	0.907519	-0.14	0.095
816	NADH dehydrogenase (Ubiquinone) 24 kDa subunit, isoform A OS=Drosophila melanogaster GN=ND-24 PE=1 SV=1	10.92	10.962	10.901	11.089	11.081	9.349	9.398	9.473	9.755	9.501	0.354781	-1.495	0
817	E3 ubiquitin-protein ligase UBR1 OS=Drosophila melanogaster GN=Ubr1 PE=2 SV=2	9.744	9.778	9.839	9.902	9.663	9.834	9.69	9.795	9.886	9.731	1.00139	0.002	0.985
818	Cullin 3, isoform F OS=Drosophila melanogaster GN=Cul3 PE=1 SV=2	9.138	9.17	9.219	9.197	9.004	9.394	9.084	9.166	9.224	9.059	1.02811	0.04	0.718
819	Glycogenin, isoform E OS=Drosophila melanogaster GN=Glycogenin PE=1 SV=1	9.71	9.558	9.72	9.665	9.85	9.25	9.177	9.228	9.426	9.396	0.755236	-0.405	0.002
820	Uncharacterized protein, isoform I OS=Drosophila melanogaster GN=LUBEL PE=4 SV=1	8.996	9.042	9.053	9.054	9.015	8.695	8.632	8.706	8.561	8.532	0.75419	-0.407	0
821	Adenylate kinase OS=Drosophila melanogaster GN=Adk2 PE=1 SV=1	10.911	10.806	10.854	10.807	10.965	10.042	10.188	10.126	10.1	10.162	0.596668	-0.745	0
822	Keratin, type I cytoskeletal 10 OS=Homo sapiens GN=KRT10 PE=1 SV=6	8.115	9.102	6.665	8.89	10.917	9.992	6.73	6.184	8.116	7.714	0.503129	-0.991	0.393
823	CAP, isoform P OS=Drosophila melanogaster GN=CAP PE=4 SV=1	6.204	6.39	6.075	6.081	5.971	6.404	6.459	6.293	6.137	6.443	1.15109	0.203	0.113
824	BcDNA.GH10229 OS=Drosophila melanogaster GN=anon-WO0140519.245 PE=1 SV=1	10.089	10.025	9.913	10.014	9.995	9.859	9.739	9.811	9.98	9.846	0.895025	-0.16	0.059
825	GH06496p OS=Drosophila melanogaster GN=Synj PE=1 SV=1	9.666	9.57	9.467	9.505	9.74	9.51	9.486	9.659	9.559	9.739	1.00069	0.001	0.994
827	General odorant-binding protein 19d OS=Drosophila melanogaster GN=Obp19d PE=2 SV=2	9.906	10.046	9.865	9.797	10.343	9.987	10.494	10.427	9.967	10.531	1.22264	0.29	0.149
828	Protein CDV3 homolog OS=Drosophila melanogaster GN=CG3760 PE=1 SV=1	6.202	6.063	6.316	6.337	5.331	6.26	6.07	6.104	6.568	6.1	1.12584	0.171	0.516
829	Ataxin-2 homolog OS=Drosophila melanogaster GN=Atx2 PE=1 SV=1	9.307	9.174	9.355	9.283	9.245	9.325	9.36	9.265	9.219	9.142	0.992404	-0.011	0.909
830	Z band alternatively spliced PDZ-motif protein 66, isoform B OS=Drosophila melanogaster GN=Zasp66 PE=1 SV=1	9.644	9.565	9.433	9.343	9.877	8.874	8.884	9.335	9.045	9.45	0.72951	-0.455	0.027
831	Uncharacterized protein, isoform A OS=Drosophila melanogaster GN=2D9 PE=4 SV=1	9.212	9.246	9.432	9.45	8.564	9.904	9.419	9.464	9.623	9.333	1.29056	0.368	0.124
832	Adenylosuccinate synthetase OS=Drosophila melanogaster GN=AdSS PE=2 SV=1	9.992	9.736	9.675	9.952	10.454	9.097	9.383	9.462	9.836	9.948	0.74898	-0.417	0.109
833	Protein disulfide-isomerase A6 homolog OS=Drosophila melanogaster GN=CaBP1 PE=1 SV=1	10.354	10.514	10.472	10.423	10.209	10.557	10.687	10.643	10.459	10.444	1.12039	0.164	0.12
834	AT01533p OS=Drosophila melanogaster GN=Dmel\CG33129 PE=1 SV=2	9.253	9.328	9.414	9.276	9.183	9.392	9.548	9.432	9.244	9.287	1.06437	0.09	0.361
835	Aminopeptidase OS=Drosophila melanogaster GN=CG32473 PE=1 SV=2	1.69	2.702	2.853	-0.053	2.892	2.932	1.634	2.875	3.157	2.596	1.53901	0.622	0.412
836	AT13091p OS=Drosophila melanogaster GN=rngo PE=1 SV=1	9.528	9.601	9.461	9.489	9.328	9.447	9.499	9.506	9.26	9.259	0.941478	-0.087	0.403
837	ER membrane protein complex 1, isoform A OS=Drosophila melanogaster GN=EMC1 PE=1 SV=1	6.406	6.487	6.195	6.386	6.475	5.952	5.86	6.07	6.158	6.286	0.798298	-0.325	0.018
838	LD37985p OS=Drosophila melanogaster GN=Dis3l2 PE=1 SV=2	9.077	9.193	9.263	9.225	9.141	9.341	9.3	9.283	9.311	9.205	1.07773	0.108	0.148
839	Gartenzwerg, isoform B OS=Drosophila melanogaster GN=garz PE=1 SV=1	9.538	9.595	9.629	9.533	9.397	9.73	9.65	9.511	9.485	9.403	1.01185	0.017	0.883
840	FI05204p OS=Drosophila melanogaster GN=L2HGDH PE=1 SV=1	9.508	9.342	9.331	9.502	9.573	9.25	9.456	9.552	9.614	9.664	1.03958	0.056	0.658
841	LD45324p OS=Drosophila melanogaster GN=Prx5 PE=1 SV=1	11.328	11.143	11.126	11.156	11.429	10.702	10.8	10.584	10.607	10.858	0.694478	-0.526	0.001
842	NTPase, isoform F OS=Drosophila melanogaster GN=NTPase PE=1 SV=1	9.152	9.082	9.042	9.071	9.244	9.35	9.377	9.214	9.428	9.438	1.18345	0.243	0.013
843	Pixie, isoform A OS=Drosophila melanogaster GN=pix PE=1 SV=1	10.473	10.472	10.519	10.479	10.3	10.534	10.466	10.421	10.634	10.392	1.02811	0.04	0.67
844	Fatty acyl-CoA reductase OS=Drosophila melanogaster GN=CG10096 PE=2 SV=2	10.34	10.557	10.19	10.405	10.102	10.369	10.405	10.372	10.56	10.427	1.07773	0.108	0.369
845	CG8586, isoform A OS=Drosophila melanogaster GN=CG8586-RA PE=1 SV=1	10.155	10.046	10.185	10.138	10.313	10.393	10.277	10.106	10.374	10.276	1.08523	0.118	0.234
846	A kinase anchor protein 200, isoform B OS=Drosophila melanogaster GN=Akap200 PE=1 SV=1	7.415	7.293	7.423	7.3	7.13	7.825	7.594	7.585	7.693	7.52	1.25788	0.331	0.008
847	Serine/threonine-protein phosphatase OS=Drosophila melanogaster GN=Pp2B-14D PE=3 SV=1	8.728	8.76	8.693	8.605	8.668	8.893	8.798	8.898	8.839	8.886	1.12662	0.172	0.023
848	Protein mesh OS=Drosophila melanogaster GN=mesh PE=1 SV=2	9.392	9.2	9.285	9.238	9.528	9.363	9.662	9.583	9.481	9.726	1.17691	0.235	0.06
849	Probable elongation factor 1-delta OS=Drosophila melanogaster GN=eEF1delta PE=1 SV=1	10.563	10.619	10.728	10.755	10.434	11.009	10.871	10.772	11.002	10.819	1.20999	0.275	0.02
850	LD34157p OS=Drosophila melanogaster GN=CG10184 PE=1 SV=1	9.626	9.752	10.032	10.027	9.755	9.777	10.098	9.805	10.012	9.937	1.06216	0.087	0.528
851	Peptidyl-prolyl cis-trans isomerase OS=Drosophila melanogaster GN=CG2852 PE=1 SV=1	9.932	9.782	9.608	9.73	10.146	9.84	10.121	10.203	10.252	10.416	1.2544	0.327	0.063
852	Zinc finger protein on ecdysone puffs OS=Drosophila melanogaster GN=Pep PE=1 SV=1	9.664	9.667	9.674	9.669	9.497	9.748	9.862	9.783	9.438	9.538	1.02811	0.04	0.759
853	Protein tumorous imaginal discs, mitochondrial OS=Drosophila melanogaster GN=l(2)tid PE=1 SV=2	5.387	5.568	5.584	5.484	5.42	5.313	4.889	4.952	4.971	5.224	0.747943	-0.419	0.005
854	CathD OS=Drosophila melanogaster GN=cathD PE=1 SV=1	9.509	9.297	9.69	9.485	9.374	9.534	9.591	9.434	9.9	9.679	1.11419	0.156	0.254
855	Probable cytochrome P450 28d1 OS=Drosophila melanogaster GN=Cyp28d1 PE=2 SV=1	10.293	10.325	10.265	10.345	10.618	9.973	10.091	9.787	10.226	10.114	0.794985	-0.331	0.021
856	FI04457p OS=Drosophila melanogaster GN=GCC185 PE=1 SV=3	9.017	9.116	8.982	9.023	8.927	9.188	9.232	9.117	9.088	9.056	1.089	0.123	0.12
857	Chitinase-like protein Idgf3 OS=Drosophila melanogaster GN=Idgf3 PE=1 SV=3	9.89	9.724	10.131	9.804	9.729	10.468	10.445	10.363	10.506	10.379	1.49174	0.577	0
858	Protein windpipe OS=Drosophila melanogaster GN=wdp PE=1 SV=1	9.864	9.94	9.873	9.848	9.909	9.834	10.122	10.039	9.632	9.978	1.02385	0.034	0.796
859	6-phosphogluconate dehydrogenase, decarboxylating OS=Drosophila melanogaster GN=Pgd PE=2 SV=1	10.771	10.785	10.623	10.703	10.848	10.71	10.928	10.98	10.988	10.92	1.11651	0.159	0.101
860	Eyes shut, isoform E OS=Drosophila melanogaster GN=eys PE=4 SV=2	9.381	9.761	9.569	9.636	9.782	9.08	9.234	9.244	9.215	9.26	0.747943	-0.419	0.003
861	Otefin OS=Drosophila melanogaster GN=Ote PE=1 SV=2	9.33	9.145	9.213	9.15	9.21	8.629	8.522	8.647	8.638	8.675	0.665726	-0.587	0
862	Electron transfer flavoprotein-ubiquinone oxidoreductase, isoform A OS=Drosophila melanogaster GN=Etf-QO PE=1 SV=1	9.887	9.878	9.809	9.887	10.093	9.778	9.973	9.95	10.079	10.181	1.05775	0.081	0.486
863	Protein peanut OS=Drosophila melanogaster GN=pnut PE=1 SV=2	9.729	9.663	9.862	9.776	9.618	9.813	9.81	9.849	9.889	9.744	1.06511	0.091	0.266
864	Pre-mRNA processing factor 8 OS=Drosophila melanogaster GN=Prp8 PE=1 SV=1	9.322	9.382	9.286	9.286	9.228	9.516	9.355	9.477	9.492	9.537	1.12818	0.174	0.031
865	Lipid storage droplets surface-binding protein 2 OS=Drosophila melanogaster GN=Lsd-2 PE=1 SV=1	10.087	9.659	9.596	9.915	10.969	8.738	9.163	9.462	10.226	10.237	0.716978	-0.48	0.305
866	Tetratricopeptide repeat protein 2 OS=Drosophila melanogaster GN=Tpr2 PE=1 SV=1	9.605	9.524	9.536	9.478	9.59	9.461	9.44	9.469	9.756	9.722	1.01607	0.023	0.848
867	Thioredoxin domain-containing protein 5 homolog OS=Drosophila melanogaster GN=prtp PE=1 SV=2	10.344	10.325	10.288	10.349	10.16	10.231	10.231	10.199	10.553	10.435	1.02598	0.037	0.759
868	Protein kinase C delta, isoform E OS=Drosophila melanogaster GN=Pkcdelta PE=4 SV=3	9.23	9.183	9.123	9.178	9.154	9.387	9.279	9.33	9.173	9.222	1.07475	0.104	0.171
869	Keratin, type II cytoskeletal 2 epidermal OS=Homo sapiens GN=KRT2 PE=1 SV=2	8.078	8.43	6.659	8.455	9.987	9.813	6.448	5.801	7.449	7.204	0.507683	-0.978	0.349
870	Eukaryotic initiation factor 2gamma, isoform D OS=Drosophila melanogaster GN=eIF2gamma PE=4 SV=1	10.087	10.136	10.086	10.093	10.006	10.161	10.129	10.026	10.232	10.079	1.03097	0.044	0.576
871	FI05212p OS=Drosophila melanogaster GN=Sodh-1 PE=1 SV=1	9.207	9.088	8.986	9.602	10.582	8.545	10.027	9.426	10.048	10.151	1.10726	0.147	0.792
872	Neurochondrin homolog OS=Drosophila melanogaster GN=Neurochondrin PE=2 SV=1	10.352	10.14	10.293	10.354	9.94	10.316	10.029	10.156	10.413	10.283	1.01677	0.024	0.881
873	Regulatory particle non-ATPase 6, isoform C OS=Drosophila melanogaster GN=Rpn6 PE=1 SV=1	10.827	10.743	10.75	10.844	10.974	10.554	10.692	10.587	10.788	10.746	0.898755	-0.154	0.104
874	Granny smith, isoform F OS=Drosophila melanogaster GN=grsm PE=1 SV=1	9.956	9.867	9.706	9.847	9.713	9.765	9.754	10.022	10.073	10.09	1.089	0.123	0.31
875	Gelsolin OS=Drosophila melanogaster GN=Gel PE=1 SV=2	10.26	10.35	10.321	10.048	9.892	9.165	9.238	9.746	9.374	9.678	0.601235	-0.734	0.002
876	LD36620p OS=Drosophila melanogaster GN=verm PE=1 SV=1	6.397	5.77	6.558	6.867	3.496	7.857	5.267	5.898	7.535	5.228	1.45297	0.539	0.605
877	Transmembrane GTPase Marf OS=Drosophila melanogaster GN=Marf PE=1 SV=1	10.061	10.061	10.05	10.06	10.026	10.557	10.508	10.505	10.581	10.552	1.40347	0.489	0
878	GH22266p OS=Drosophila melanogaster GN=Dmel\CG13907 PE=1 SV=1	9.327	9.263	9.263	9.312	9.291	9.094	9.186	9.108	9.124	9.23	0.905634	-0.143	0.043
879	Rugose, isoform Q OS=Drosophila melanogaster GN=rg PE=1 SV=1	8.438	8.526	8.326	8.483	8.391	8.425	8.616	8.503	8.748	8.589	1.1042	0.143	0.141
880	Brahma associated protein 155 kDa OS=Drosophila melanogaster GN=mor PE=1 SV=3	5.962	5.986	6.211	6.326	5.554	6.052	6.146	5.957	6.036	5.719	0.98214	-0.026	0.907
881	Uncharacterized protein OS=Drosophila melanogaster GN=Dmel\CG44195 PE=1 SV=1	9.052	9.195	9.017	9.083	9.27	9.339	9.258	9.397	9.245	9.303	1.13682	0.185	0.044
882	Glycylpeptide N-tetradecanoyltransferase OS=Drosophila melanogaster GN=Nmt PE=2 SV=2	10.119	10.075	10.128	10.138	10.132	10.014	10.018	10.046	10.314	10.189	0.998615	-0.002	0.986
883	ER membrane protein complex 1, isoform C OS=Drosophila melanogaster GN=EMC1 PE=1 SV=1	5.451	5.409	5.23	5.312	5.547	4.497	4.764	4.535	5.008	5.259	0.670356	-0.577	0.01
884	CG3714, isoform H OS=Drosophila melanogaster GN=AAF51037 PE=4 SV=1	10.27	10.215	10.032	10.113	10.171	9.906	9.872	9.867	9.902	9.973	0.837406	-0.256	0.006
885	Putative oxidoreductase GLYR1 homolog OS=Drosophila melanogaster GN=CG4747 PE=1 SV=1	5.958	5.627	5.538	6.011	6.452	6.003	6.033	6.199	6.292	6.138	1.16151	0.216	0.312
886	CG9119 OS=Drosophila melanogaster GN=CT9987 PE=1 SV=1	9.831	9.875	9.971	10.095	10.095	9.904	10.444	10.137	10.033	9.955	1.08749	0.121	0.405
887	RNA-binding protein squid OS=Drosophila melanogaster GN=sqd PE=1 SV=3	9.311	9.33	9.402	9.324	9.272	9.585	9.5	9.318	9.297	9.229	1.04102	0.058	0.584
888	Eukaryotic translation initiation factor 2alpha, isoform B OS=Drosophila melanogaster GN=eIF2alpha PE=4 SV=1	10.156	10.124	10.104	10.108	9.995	10.209	10.197	10.19	10.314	10.17	1.08598	0.119	0.107
889	PASILLA splice variant 3 OS=Drosophila melanogaster GN=ps PE=1 SV=1	9.823	9.732	9.876	9.83	9.692	9.765	9.64	9.457	9.545	9.414	0.85441	-0.227	0.04
890	CG4747, isoform B OS=Drosophila melanogaster GN=BEST:GH19401 PE=4 SV=1	6.149	5.955	6.14	6.379	6.627	6.476	6.072	6.228	6.213	6.273	1.00208	0.003	0.99
891	Proteasome subunit alpha type-7-1 OS=Drosophila melanogaster GN=Prosalpha4 PE=1 SV=2	10.133	10.219	9.971	10.126	10.011	10.127	10.257	10.284	10.331	10.258	1.11651	0.159	0.08
892	CG4562, isoform E OS=Drosophila melanogaster GN=CG4562 PE=4 SV=1	9.965	10.063	9.584	9.841	9.723	10.064	9.829	10.07	9.863	9.919	1.08222	0.114	0.39
893	Dorsal, isoform F OS=Drosophila melanogaster GN=dl PE=1 SV=1	9.193	8.832	8.978	9.167	9.113	9.183	9.352	9.175	9.047	9.11	1.08448	0.117	0.317
894	CG9990, isoform A OS=Drosophila melanogaster GN=CG9990 PE=1 SV=1	9.218	9.436	9.267	9.281	9.483	9.293	9.5	9.474	9.092	9.329	1.00069	0.001	0.996
895	CG8547, isoform C OS=Drosophila melanogaster GN=CG8547 PE=1 SV=2	9.254	9.492	9.387	9.438	9.485	9.332	9.386	9.599	9.386	9.413	1.00835	0.012	0.912
896	LD32873p OS=Drosophila melanogaster GN=mahe PE=1 SV=1	8.944	8.868	9.074	8.969	8.668	9.016	8.946	9.061	8.923	8.679	1.01396	0.02	0.889
897	LD16419p OS=Drosophila melanogaster GN=RhoGDI PE=1 SV=1	10.079	9.955	9.94	9.826	10.034	10.019	10.144	10.012	10.068	10.175	1.08448	0.117	0.18
898	CG1532, isoform A OS=Drosophila melanogaster GN=CG1532 PE=1 SV=1	10.431	10.372	10.139	10.349	10.457	9.835	9.894	10.258	10.606	10.485	0.911301	-0.134	0.525
899	CG9510, isoform B OS=Drosophila melanogaster GN=BEST:GH06087 PE=1 SV=3	9.911	10.055	10.044	10.245	10.392	9.649	10.149	9.686	9.855	9.832	0.815072	-0.295	0.07
900	Protein bark beetle OS=Drosophila melanogaster GN=bark PE=1 SV=1	8.777	8.707	8.792	8.689	8.686	8.964	8.877	8.882	8.978	8.916	1.14314	0.193	0.012
901	Serine--pyruvate aminotransferase OS=Drosophila melanogaster GN=Spat PE=1 SV=1	9.742	9.7	9.809	9.9	10.212	10.005	10.281	9.945	10.422	10.394	1.26313	0.337	0.06
902	Sarcomere length short, isoform B OS=Drosophila melanogaster GN=sals PE=1 SV=2	9.228	8.78	8.814	8.612	8.465	9.199	9.342	9.328	8.939	9.164	1.3333	0.415	0.037
903	Protein l(2)37Cc OS=Drosophila melanogaster GN=l(2)37Cc PE=2 SV=2	10.442	10.323	10.402	10.374	10.308	10.617	10.288	10.562	10.614	10.565	1.11729	0.16	0.109
904	CG5590 OS=Drosophila melanogaster GN=CG5590 PE=1 SV=1	10.606	10.413	10.216	10.424	10.69	9.383	9.476	9.503	9.806	9.739	0.540363	-0.888	0
905	Xanthine dehydrogenase OS=Drosophila melanogaster GN=ry PE=2 SV=2	9.183	9.329	9.357	9.453	9.378	9.943	10.468	10.018	10.222	10.249	1.79005	0.84	0
906	Cht6, isoform C OS=Drosophila melanogaster GN=Cht6 PE=1 SV=1	8.01	7.625	7.986	8.091	6.728	8.725	7.739	8.003	8.596	7.896	1.41814	0.504	0.198
908	RNA-binding protein 4F OS=Drosophila melanogaster GN=Rnp4F PE=1 SV=1	8.984	8.906	8.962	8.907	8.981	9.078	8.925	8.908	8.9	8.752	0.975355	-0.036	0.699
909	Trehalose 6-phosphate phosphatase OS=Drosophila melanogaster GN=Dmel\CG5177 PE=1 SV=1	10.66	10.481	10.31	10.482	11.049	10.504	10.782	10.882	10.85	11.112	1.17283	0.23	0.253
910	CG6830 OS=Drosophila melanogaster GN=CG6830 PE=1 SV=1	9.575	9.544	9.458	9.478	9.57	10.079	10.25	10.126	9.885	10.102	1.47734	0.563	0
911	Lipid storage droplet-1, isoform D OS=Drosophila melanogaster GN=Lsd-1 PE=1 SV=1	5.374	5.014	4.749	4.749	5.864	4.324	3.168	4.118	4.442	4.494	0.48599	-1.041	0.017
912	Lipophorin receptor 2, isoform G OS=Drosophila melanogaster GN=LpR2 PE=4 SV=1	8.873	8.402	9.165	8.385	8.839	8.705	9.015	8.759	8.653	8.762	1.0324	0.046	0.838
913	CG3209, isoform D OS=Drosophila melanogaster GN=CG3209 PE=1 SV=1	10.504	10.521	10.434	10.398	10.39	10.309	10.435	10.293	10.145	10.322	0.901875	-0.149	0.092
914	Heavy metal tolerance factor 1 OS=Drosophila melanogaster GN=Hmt-1 PE=1 SV=1	9.31	9.389	9.328	9.254	9.191	9.408	9.293	9.156	9.112	9.161	0.95396	-0.068	0.486
915	GrpE protein homolog, mitochondrial OS=Drosophila melanogaster GN=Roe1 PE=2 SV=2	10.407	10.324	10.343	10.38	10.242	11.022	10.889	11.059	11.032	11.062	1.59549	0.674	0
917	Glutactin OS=Drosophila melanogaster GN=Glt PE=1 SV=2	8.022	8.424	8.317	8.387	8.243	9.142	9.314	9.578	9.146	9.299	2.02371	1.017	0
918	26S proteasome non-ATPase regulatory subunit 4 OS=Drosophila melanogaster GN=Rpn10 PE=1 SV=2	9.748	9.708	9.677	9.784	9.697	9.593	9.531	9.555	9.788	9.692	0.938872	-0.091	0.28
919	IP11925p OS=Drosophila melanogaster GN=CG11878 PE=2 SV=1	9.522	9.415	9.37	9.448	9.937	9.718	10.669	10.294	9.895	10.283	1.55079	0.633	0.019
920	Protein gone early OS=Drosophila melanogaster GN=goe PE=2 SV=1	9.872	9.782	9.67	9.692	9.966	9.723	9.857	9.796	9.72	9.895	1.00139	0.002	0.988
921	Par-1, isoform H OS=Drosophila melanogaster GN=par-1 PE=1 SV=1	7.368	7.421	7.469	7.504	7.431	7.423	7.586	7.416	7.117	7.213	0.940826	-0.088	0.466
922	Microsomal triacylglycerol transfer protein OS=Drosophila melanogaster GN=Mtp PE=1 SV=2	9.881	9.912	9.895	9.837	9.922	9.893	10.032	9.793	10.03	9.889	1.02669	0.038	0.657
923	Ubiquitin carboxyl-terminal hydrolase 7 OS=Drosophila melanogaster GN=Usp7 PE=1 SV=1	10.093	10.071	9.989	10.011	10.02	10.043	9.996	10.035	10.116	10.029	1.00486	0.007	0.929
924	Atlastin, isoform C OS=Drosophila melanogaster GN=atl PE=4 SV=1	10.456	10.543	10.367	10.482	10.576	10.101	10.175	10.262	10.525	10.464	0.883315	-0.179	0.145
925	CG5844 OS=Drosophila melanogaster GN=CG5844 PE=1 SV=1	10.197	10.123	10.194	10.223	10.164	10.166	10.095	10.261	10.277	10.082	0.997231	-0.004	0.97
926	LD23875p OS=Drosophila melanogaster GN=Dmel\CG10565 PE=1 SV=1	9.954	9.987	10.041	10.101	9.83	10.103	9.998	9.98	10.099	9.968	1.03311	0.047	0.602
927	Prominin, isoform D OS=Drosophila melanogaster GN=prom PE=1 SV=1	10.213	10.142	10.1	10.073	10.373	10.194	10.149	10.194	10.237	10.22	1.01326	0.019	0.849
928	Sulfhydryl oxidase OS=Drosophila melanogaster GN=CG4670 PE=1 SV=1	10.539	10.464	10.374	10.341	10.639	10.337	10.517	10.436	10.529	10.555	1.00208	0.003	0.98
929	Retinal degeneration B, isoform G OS=Drosophila melanogaster GN=rdgB PE=1 SV=1	9.153	9.15	9.003	9.071	9.231	9.088	9.12	9.091	9.02	9.159	0.98214	-0.026	0.76
930	Glutaminase, isoform F OS=Drosophila melanogaster GN=GLS PE=1 SV=1	7.508	7.294	7.251	7.177	6.988	6.821	6.866	6.783	6.861	6.536	0.721965	-0.47	0.004
932	Ejaculatory bulb protein, isoform B OS=Drosophila melanogaster GN=Ebp PE=4 SV=1	10.637	10.734	9.789	10.543	11.22	10.098	10.488	10.298	10.025	10.813	0.846745	-0.24	0.477
933	Eukaryotic translation initiation factor 3 subunit D-1 OS=Drosophila melanogaster GN=eIF-3p66 PE=1 SV=1	9.875	9.798	9.888	9.923	9.691	9.878	9.9	9.801	10.036	9.778	1.03097	0.044	0.656
934	LD37169p OS=Drosophila melanogaster GN=CG14207 PE=1 SV=1	8.832	8.299	8.273	8.305	8.57	7.987	8.28	8.415	8.244	8.784	0.924023	-0.114	0.608
935	LIM and SH3 domain protein Lasp OS=Drosophila melanogaster GN=Lasp PE=1 SV=2	7.751	7.727	7.842	7.788	7.832	7.234	7.312	7.276	7.589	7.321	0.736624	-0.441	0.001
936	4-hydroxyphenylpyruvate dioxygenase OS=Drosophila melanogaster GN=Dmel\CG11796 PE=1 SV=1	9.067	9.144	9.961	9.583	9.265	10.233	10.656	9.876	10.257	10.095	1.76418	0.819	0.007
937	Uncharacterized protein, isoform B OS=Drosophila melanogaster GN=17839 PE=1 SV=2	8.814	9.039	8.876	8.952	8.891	9.17	9.083	9.068	8.983	8.832	1.08147	0.113	0.262
938	Peroxiredoxin 3 OS=Drosophila melanogaster GN=Prx3 PE=1 SV=2	10.142	10.04	10.02	10.041	10.057	9.94	9.743	9.934	10.005	9.96	0.905006	-0.144	0.09
939	CG5945, isoform A OS=Drosophila melanogaster GN=CT18564 PE=1 SV=1	9.93	10.017	9.81	9.958	10.04	10.011	10.37	10.259	10.031	10.302	1.18427	0.244	0.046
940	Cortactin, isoform A OS=Drosophila melanogaster GN=Cortactin PE=1 SV=1	10.421	10.337	10.492	10.377	10.219	10.61	10.708	10.618	10.509	10.522	1.16797	0.224	0.023
941	Puffyeye, isoform H OS=Drosophila melanogaster GN=puf PE=1 SV=1	8.305	8.273	8.466	8.306	8.146	8.492	8.342	8.388	8.307	8.238	1.03814	0.054	0.595
942	CG3270 OS=Drosophila melanogaster GN=CG3270-RA PE=1 SV=1	9.899	9.86	9.618	10.066	10.04	10.043	10.357	10.327	10.409	10.504	1.3491	0.432	0.01
943	Aminomethyltransferase OS=Drosophila melanogaster GN=151967_at PE=1 SV=1	9.213	9.196	9.382	9.468	9.433	9.826	10.213	10.052	10.328	10.398	1.77154	0.825	0
944	Coronin OS=Drosophila melanogaster GN=pod1 PE=1 SV=1	2.647	1.748	2.771	3.099	2.911	3.221	3.798	2.997	1.394	2.722	1.14155	0.191	0.752
945	Lipid storage droplets surface-binding protein 1 OS=Drosophila melanogaster GN=Lsd-1 PE=2 SV=2	6.398	6.136	5.994	6.345	6.994	4.722	5.075	5.118	5.127	5.075	0.392292	-1.35	0
946	Maltase A7, isoform A OS=Drosophila melanogaster GN=Mal-A7 PE=4 SV=1	9.628	9.966	9.619	9.968	10.622	9.302	10.434	9.836	10.088	10.129	0.997923	-0.003	0.994
947	FI01422p OS=Drosophila melanogaster GN=Spn43Ab PE=1 SV=1	10.043	9.869	9.993	9.868	10.299	9.99	10.594	10.847	10.726	11.049	1.54435	0.627	0.019
948	Elongation factor Ts, mitochondrial OS=Drosophila melanogaster GN=mEFTs PE=2 SV=1	10.144	10.04	10.155	10.314	10.21	9.961	9.712	10.024	10.108	10.097	0.875391	-0.192	0.107
949	Eukaryotic translation initiation factor 5A OS=Drosophila melanogaster GN=eIF-5A PE=2 SV=2	10.936	10.628	10.698	10.887	11.734	10.463	10.617	10.597	10.979	11.152	0.861546	-0.215	0.466
950	Alpha-soluble NSF attachment protein OS=Drosophila melanogaster GN=alphaSnap PE=1 SV=1	10.037	9.957	9.837	9.952	10.178	9.741	10.004	10.116	10.114	10.233	1.03455	0.049	0.734
951	Protein krasavietz OS=Drosophila melanogaster GN=kra PE=1 SV=1	10.63	10.634	10.718	10.542	10.384	10.705	10.612	10.476	10.678	10.456	1.00278	0.004	0.979
952	MIP33436p1 OS=Drosophila melanogaster GN=Pp2A-29B PE=1 SV=1	10.336	10.233	10.259	10.265	10.277	10.028	9.964	9.976	10.096	10.042	0.83915	-0.253	0.003
953	Arc42 OS=Drosophila melanogaster GN=Arc42 PE=1 SV=1	9.501	9.515	9.439	9.533	9.678	9.51	9.68	9.575	9.748	9.862	1.10343	0.142	0.179
954	CG8927, isoform C OS=Drosophila melanogaster GN=CG8927 PE=1 SV=3	9.776	9.357	10.158	10.067	8.726	10.048	9.122	9.06	9.931	9.317	0.91955	-0.121	0.786
955	Beta-alanine synthase OS=Drosophila melanogaster GN=pyd3 PE=1 SV=2	9.738	9.687	9.701	9.794	10.008	9.448	9.722	9.464	9.58	9.541	0.849685	-0.235	0.041
956	Glutamine:fructose-6-phosphate aminotransferase 1, isoform A OS=Drosophila melanogaster GN=Gfat1 PE=1 SV=2	8.329	8.245	8.456	8.442	8.296	8.375	8.199	8.404	8.84	8.459	1.07326	0.102	0.499
957	Tiggrin, isoform B OS=Drosophila melanogaster GN=Tig PE=1 SV=1	9.123	8.708	8.954	8.867	8.888	8.73	8.586	8.711	9.006	8.613	0.883315	-0.179	0.182
958	AT27079p OS=Drosophila melanogaster GN=scpr-C PE=2 SV=1	8.933	8.97	8.709	8.611	8.805	8.333	7.918	8.18	8.15	7.673	0.592546	-0.755	0.001
959	GEO07453p1 OS=Drosophila melanogaster GN=RpL26 PE=1 SV=1	10.721	10.632	10.6	10.787	10.73	10.683	10.72	10.668	11.14	10.872	1.08824	0.122	0.34
960	CG6432, isoform A OS=Drosophila melanogaster GN=CG6432 PE=2 SV=1	10.397	10.536	10.31	10.328	10.123	10.176	10.264	10.131	10.153	10.18	0.896267	-0.158	0.127
961	Gp210 ortholog, isoform A OS=Drosophila melanogaster GN=Gp210 PE=1 SV=1	9.14	9.493	9.143	9.175	9.251	9.454	9.364	9.599	9.643	9.745	1.2492	0.321	0.022
962	CG8149 OS=Drosophila melanogaster GN=CG8149 PE=1 SV=1	9.464	9.382	9.512	9.432	9.289	9.501	9.493	9.401	9.409	9.287	1.00139	0.002	0.984
963	GH13039p OS=Drosophila melanogaster GN=gammaSnap1 PE=1 SV=1	10.053	9.981	9.944	9.972	10.144	9.458	9.654	9.599	9.607	9.686	0.748461	-0.418	0
964	UDP-glucose 4-epimerase OS=Drosophila melanogaster GN=Gale PE=1 SV=1	10.203	10.102	10.166	10.345	10.426	10.239	10.686	10.447	10.625	10.563	1.2008	0.264	0.056
965	LP08082p OS=Drosophila melanogaster GN=Ranbp9 PE=1 SV=1	9.296	9.231	9.285	9.384	9.256	9.187	9.064	9.086	9.293	9.13	0.908148	-0.139	0.096
966	Extended synaptotagmin-like protein 2 ortholog, isoform D OS=Drosophila melanogaster GN=Esyt2 PE=1 SV=1	10.069	9.908	9.962	9.989	10.139	9.928	10.027	10.006	10.243	10.258	1.05629	0.079	0.48
967	LD47962p OS=Drosophila melanogaster GN=ND-49 PE=1 SV=2	11.594	11.108	10.812	11.159	12.031	9.275	9.517	9.933	10.849	10.792	0.415235	-1.268	0.016
968	40S ribosomal protein S9 OS=Drosophila melanogaster GN=RpS9 PE=1 SV=2	10.851	10.823	10.85	10.879	10.747	10.968	11.054	11.063	11.275	10.997	1.18181	0.241	0.017
969	Embargoed, isoform B OS=Drosophila melanogaster GN=emb PE=1 SV=1	10.082	10.042	10.042	10.052	10.031	10.153	10.039	9.999	10.076	10.051	1.00975	0.014	0.853
970	Huntingtin interacting protein 1 OS=Drosophila melanogaster GN=Hip1 PE=1 SV=1	8.88	8.729	8.936	8.773	8.691	8.753	8.858	8.709	8.711	8.86	0.983502	-0.024	0.812
971	Ribosomal protein S2, isoform B OS=Drosophila melanogaster GN=RpS2 PE=3 SV=1	10.002	9.9	9.826	10.033	10.053	9.933	10.033	9.984	10.679	10.311	1.16878	0.225	0.224
972	Lectin-29Ca OS=Drosophila melanogaster GN=lectin-29Ca PE=4 SV=1	10.312	10.361	10.01	10.051	10.797	9.666	10.467	10.399	9.801	10.393	0.894405	-0.161	0.567
973	FI17817p1 OS=Drosophila melanogaster GN=Tango5 PE=1 SV=1	7.567	7.825	7.891	7.833	7.672	7.791	7.919	7.49	7.342	7.291	0.875998	-0.191	0.277
974	GTP-binding protein 128up OS=Drosophila melanogaster GN=128up PE=2 SV=2	10.111	10.082	10.067	10.045	10.125	10.021	10.081	9.993	10.137	10.169	0.99654	-0.005	0.951
975	Regulatory particle triple-A ATPase 4 OS=Drosophila melanogaster GN=Rpt4 PE=1 SV=3	9.518	9.469	9.449	9.441	9.383	9.444	9.355	9.309	9.586	9.479	0.987601	-0.018	0.854
976	Upheld, isoform N OS=Drosophila melanogaster GN=up PE=1 SV=1	6.438	7.198	7.477	7.289	7.656	6.758	6.991	7.468	6.93	7.3	0.918913	-0.122	0.702
977	60S acidic ribosomal protein P0 OS=Drosophila melanogaster GN=RpLP0 PE=3 SV=1	10.921	10.797	10.914	10.964	10.99	11.084	11.208	11.075	11.287	11.093	1.17446	0.232	0.016
978	Troponin T, skeletal muscle OS=Drosophila melanogaster GN=up PE=1 SV=3	6.974	7.631	8	7.399	7.812	7.166	7.492	7.993	7.157	7.771	0.967947	-0.047	0.889
979	Lysine--tRNA ligase OS=Drosophila melanogaster GN=LysRS PE=1 SV=2	10.134	10.022	10.001	10.08	10.065	9.99	10.042	9.999	10.279	10.121	1.01748	0.025	0.798
980	EG:BACR25B3.5 protein OS=Drosophila melanogaster GN=CG13759-RA PE=2 SV=2	9.585	9.752	9.54	9.628	9.714	9.391	9.678	9.666	9.58	9.709	0.973329	-0.039	0.721
981	Cytoplasmic FMR1-interacting protein OS=Drosophila melanogaster GN=Sra-1 PE=1 SV=1	9.838	9.93	9.91	9.843	9.806	9.875	9.928	9.902	9.853	9.843	1.01045	0.015	0.841
982	CG1774, isoform A OS=Drosophila melanogaster GN=CG1774 PE=1 SV=1	10.191	10.224	10.169	10.255	10.307	9.425	9.404	9.58	9.493	9.67	0.609205	-0.715	0
983	Glutaminase, isoform B OS=Drosophila melanogaster GN=GLS PE=1 SV=1	4.296	3.917	4.602	4.616	4.644	4.171	4.219	4.402	4.639	4.706	1.00835	0.012	0.966
984	GH04176p OS=Drosophila melanogaster GN=Sip1 PE=1 SV=1	9.332	9.211	9.198	9.247	9.252	9.097	9.294	9.301	9.336	9.309	1.01396	0.02	0.83
985	Nucleoporin 205kD, isoform B OS=Drosophila melanogaster GN=Nup205 PE=1 SV=1	9.14	9.227	9.193	9.152	9.063	9.389	9.213	9.273	9.349	9.284	1.1065	0.146	0.062
986	C-type lectin 27kD, isoform A OS=Drosophila melanogaster GN=Clect27 PE=1 SV=1	9.58	9.445	9.605	9.655	9.288	9.864	9.578	9.865	10.171	9.913	1.28699	0.364	0.026
987	PP2A-B', isoform Q OS=Drosophila melanogaster GN=PP2A-B' PE=1 SV=1	8.332	8.135	8.311	8.291	8.601	7.729	8.051	8.033	8.213	8.215	0.820173	-0.286	0.068
988	Uncharacterized protein, isoform A OS=Drosophila melanogaster GN=Dmel\CG16826 PE=1 SV=1	8.415	8.161	8.564	8.746	8.332	8.91	8.543	9.295	10.312	10.219	2.0167	1.012	0.033
989	Beta-hexosaminidase OS=Drosophila melanogaster GN=Hexo2 PE=1 SV=1	9.102	8.901	9.146	9.025	9.079	9.307	9.496	9.462	9.567	9.63	1.35849	0.442	0.001
990	WD repeat domain 62, isoform G OS=Drosophila melanogaster GN=Wdr62 PE=4 SV=1	9.585	9.612	9.624	9.598	9.51	10.055	9.9	9.747	9.734	9.709	1.18345	0.243	0.026
991	Protein kinase C OS=Drosophila melanogaster GN=Pkc98E PE=3 SV=1	9.798	9.814	9.74	9.7	9.771	9.812	9.832	9.793	9.571	9.649	0.977386	-0.033	0.726
992	Uncharacterized protein, isoform C OS=Drosophila melanogaster GN=Dmel\CG43367 PE=4 SV=1	8.412	8.535	8.386	8.399	8.591	9.017	8.997	8.967	9.008	9.03	1.45297	0.539	0
993	Calnexin 14D OS=Drosophila melanogaster GN=Cnx14D PE=3 SV=2	8.966	8.985	9.143	9.151	8.897	8.875	8.642	8.808	8.72	8.533	0.804966	-0.313	0.012
994	G protein alpha o subunit OS=Drosophila melanogaster GN=Galphao PE=1 SV=1	9.857	9.667	9.537	9.624	9.784	9.665	9.565	9.717	9.788	9.847	1.01607	0.023	0.85
995	Glycogen binding subunit 76A, isoform B OS=Drosophila melanogaster GN=Gbs-76A PE=4 SV=1	9.949	9.942	9.876	9.819	10.115	9.026	8.869	9.077	8.964	8.991	0.515842	-0.955	0
996	Aspartyl-tRNA synthetase, mitochondrial, isoform A OS=Drosophila melanogaster GN=AspRS-m PE=1 SV=3	9.368	9.396	9.504	9.578	9.318	9.496	9.331	9.43	9.417	9.305	0.97468	-0.037	0.699
997	Heat shock protein 27 OS=Drosophila melanogaster GN=Hsp27 PE=1 SV=2	10.272	10.308	10.503	10.543	10.169	10.111	10.039	10.245	10.253	9.882	0.83915	-0.253	0.065
998	Phosphomannomutase 45A OS=Drosophila melanogaster GN=Pmm45A PE=1 SV=1	9.744	9.749	9.631	9.751	9.666	9.765	9.523	9.607	9.731	9.426	0.934327	-0.098	0.326
999	Probable 2-oxoglutarate dehydrogenase E1 component DHKTD1 homolog, mitochondrial OS=Drosophila melanogaster GN=CG1544 PE=2 SV=2	9.777	9.77	10.151	10.097	10.079	9.71	10.135	9.813	10.143	10.218	1.0203	0.029	0.881
1000	RNA polymerase II elongation factor, isoform B OS=Drosophila melanogaster GN=TfIIS PE=4 SV=1	9.458	9.397	9.495	9.457	9.355	9.754	9.615	9.729	9.567	9.522	1.15269	0.205	0.026
1001	Glutathione S transferase T1 OS=Drosophila melanogaster GN=GstT1 PE=1 SV=1	9.951	9.845	9.759	9.813	10.037	9.813	10.003	9.935	10.053	10.124	1.07549	0.105	0.318
1002	Ef1alpha-like factor, isoform A OS=Drosophila melanogaster GN=eRF3 PE=1 SV=1	10.362	10.296	10.396	10.361	10.242	10.276	10.206	10.17	10.359	10.196	0.939523	-0.09	0.249
1003	DI01187p OS=Drosophila melanogaster GN=CG12896-RA PE=2 SV=1	7.395	7.329	7.585	7.605	7.678	3.391	3.945	4.326	3.716	3.986	0.0799366	-3.645	0
1004	Coatomer subunit delta OS=Drosophila melanogaster GN=deltaCOP PE=1 SV=1	10.309	10.325	10.392	10.307	10.119	10.367	10.515	10.324	10.295	10.323	1.05263	0.074	0.425
1005	Adenosylhomocysteinase OS=Drosophila melanogaster GN=Ahcy PE=3 SV=1	10.54	10.546	10.676	10.641	10.661	10.289	10.522	10.451	10.746	10.611	0.940174	-0.089	0.442
1006	Glutamate oxaloacetate transaminase 1, isoform B OS=Drosophila melanogaster GN=Got1 PE=1 SV=1	9.428	9.39	9.274	9.343	9.622	10.52	10.653	10.353	10.457	10.281	2.05765	1.041	0
1007	Lachesin OS=Drosophila melanogaster GN=Lac PE=1 SV=2	10.261	9.999	10.039	10.118	10.175	9.976	9.968	9.989	10.3	10.233	0.982821	-0.025	0.849
1008	Cytochrome P450 9b2 OS=Drosophila melanogaster GN=Cyp9b2 PE=2 SV=1	9.97	10.001	9.781	9.951	10.263	10.699	10.965	10.974	10.722	11.094	1.86348	0.898	0
1009	GIGYF family protein CG11148 OS=Drosophila melanogaster GN=CG11148 PE=1 SV=2	8.842	8.899	9.071	8.927	8.773	9.072	9.045	8.909	8.692	8.677	0.983502	-0.024	0.875
1010	Crystallin, isoform A OS=Drosophila melanogaster GN=Crys PE=1 SV=2	8.643	9.04	8.493	8.833	8.892	8.808	9.034	9.332	9.176	9.382	1.28877	0.366	0.052
1011	Peptide deformylase OS=Drosophila melanogaster GN=CG31373 PE=3 SV=1	9.716	9.723	9.755	9.932	9.965	9.882	10.127	10.202	10.327	10.312	1.27633	0.352	0.016
1012	Cytochrome c oxidase subunit 5B, isoform A OS=Drosophila melanogaster GN=COX5B PE=1 SV=1	11.483	11.416	11.194	11.292	11.591	9.713	9.87	10.048	10.045	10.073	0.367292	-1.445	0
1013	RE23984p OS=Drosophila melanogaster GN=Trp1 PE=1 SV=1	9.059	9.144	9.18	9.129	8.937	9.226	9.347	9.119	9.04	9.014	1.04247	0.06	0.591
1014	Hsc70-interacting protein 2 OS=Drosophila melanogaster GN=HIP-R PE=1 SV=2	10.279	10.209	10.214	10.354	10.317	10.345	10.399	10.457	10.698	10.498	1.15269	0.205	0.048
1015	Probable cytochrome P450 28a5 OS=Drosophila melanogaster GN=Cyp28a5 PE=2 SV=1	9.781	9.67	9.521	9.599	9.719	10.327	10.506	10.441	10.25	10.61	1.70409	0.769	0
1016	CG7675, isoform B OS=Drosophila melanogaster GN=CG7675 PE=1 SV=2	10.618	10.48	10.317	10.431	10.328	10.121	10.313	10.07	10.281	10.148	0.842063	-0.248	0.028
1017	RH45712p OS=Drosophila melanogaster GN=Dmel\CG14109 PE=1 SV=1	10.137	10.138	9.989	10.056	9.931	10.18	10.292	10.408	10.305	10.398	1.20247	0.266	0.01
1018	CYP6G1 OS=Drosophila melanogaster GN=Cyp6g1 PE=2 SV=1	9.992	10.1	9.864	10.039	10.309	9.398	9.812	9.722	9.819	9.867	0.791686	-0.337	0.032
1019	Probable elongation factor 1-beta OS=Drosophila melanogaster GN=eEF1beta PE=1 SV=3	10.904	10.74	10.878	10.909	10.944	10.575	10.748	10.727	11.069	10.968	0.960595	-0.058	0.671
1020	CG5162, isoform A OS=Drosophila melanogaster GN=CG5162 PE=1 SV=1	10.317	10.54	10.275	10.363	10.986	9.946	10.722	10.75	10.058	10.694	0.957935	-0.062	0.837
1021	CG8086, isoform I OS=Drosophila melanogaster GN=Dmel\CG8086 PE=4 SV=1	9.507	9.459	9.558	9.557	9.452	9.386	9.564	9.455	9.191	9.298	0.915099	-0.128	0.201
1022	LD24105p OS=Drosophila melanogaster GN=CG10932 PE=1 SV=1	9.672	9.679	9.731	9.732	9.726	9.977	10.202	10.061	10.234	10.115	1.32869	0.41	0
1023	Cofilin/actin-depolymerizing factor homolog OS=Drosophila melanogaster GN=tsr PE=1 SV=1	10.584	10.393	10.335	10.466	10.587	10.012	10.025	10.377	10.613	10.559	0.89751	-0.156	0.377
1024	GH28326p OS=Drosophila melanogaster GN=CG32549-RE PE=1 SV=2	10.164	10.139	9.934	10.112	10.481	10.062	10.343	10.285	10.612	10.483	1.14155	0.191	0.248
1025	Probable cytochrome P450 12a4, mitochondrial OS=Drosophila melanogaster GN=Cyp12a4 PE=2 SV=2	9.227	9.301	9.182	9.35	9.377	8.99	9.24	9.112	9.205	9.195	0.908148	-0.139	0.127
1026	Nuclear migration protein NudC OS=Drosophila melanogaster GN=nudC PE=1 SV=2	10.834	10.92	11.05	10.945	10.831	11.007	10.772	10.928	10.873	10.638	0.950659	-0.073	0.508
1027	Stromal interaction molecule homolog OS=Drosophila melanogaster GN=Stim PE=1 SV=1	8.926	8.936	8.96	8.917	8.858	8.984	9.044	8.872	8.808	8.901	1.00208	0.003	0.981
1028	Uncharacterized protein, isoform A OS=Drosophila melanogaster GN=CG12065 PE=1 SV=1	10.174	9.943	10.179	9.968	9.885	10.379	10.386	10.263	10.281	10.307	1.22519	0.293	0.009
1029	Lethal (3) 03670 OS=Drosophila melanogaster GN=Chchd3 PE=1 SV=1	10.305	10.248	10.181	10.413	10.65	9.202	9.265	9.471	9.286	9.402	0.488354	-1.034	0
1030	CG6225, isoform A OS=Drosophila melanogaster GN=CG6225 PE=2 SV=1	10.273	10.172	10.178	10.095	10.165	10.285	10.14	10.252	10.084	10.265	1.0203	0.029	0.746
1031	SR protein kinase, isoform D OS=Drosophila melanogaster GN=SRPK PE=1 SV=1	7.638	7.779	7.877	7.869	7.704	7.955	7.982	8.072	7.89	7.953	1.14631	0.197	0.035
1032	La-related protein CG11505 OS=Drosophila melanogaster GN=CG11505 PE=1 SV=2	9.189	9.246	9.226	9.305	9.056	9.311	9.306	9.18	9.104	9.094	0.99654	-0.005	0.965
1033	CG5390, isoform A OS=Drosophila melanogaster GN=SPH PE=1 SV=1	9.857	9.814	9.929	9.941	10.058	9.627	9.875	9.726	9.786	9.843	0.902501	-0.148	0.114
1034	Secretory pathway calcium atpase, isoform G OS=Drosophila melanogaster GN=SPoCk PE=3 SV=1	9.716	9.752	9.635	9.726	9.919	9.505	9.573	9.572	9.627	9.707	0.900002	-0.152	0.096
1035	BcDNA.GH02901 OS=Drosophila melanogaster GN=pdgy PE=1 SV=2	9.599	9.553	9.491	9.538	9.58	9.445	9.504	9.479	9.645	9.689	1.00069	0.001	0.995
1036	GH19076p OS=Drosophila melanogaster GN=Lpin PE=1 SV=1	10.285	10.184	10.237	10.266	10.272	10.252	10.47	10.189	10.066	10.089	0.975355	-0.036	0.758
1037	FI17352p1 OS=Drosophila melanogaster GN=vari PE=1 SV=2	9.448	9.264	9.28	9.306	9.27	9.336	9.215	9.358	9.505	9.419	1.03742	0.053	0.572
1038	GH02671p OS=Drosophila melanogaster GN=lqfR PE=1 SV=4	9.179	9.146	9.18	9.175	9.133	9.017	9.255	9.123	9.057	9.11	0.965936	-0.05	0.517
1039	Sac1 phosphatase, isoform B OS=Drosophila melanogaster GN=Sac1 PE=4 SV=1	9.765	9.741	9.549	9.716	9.77	9.736	9.74	9.763	9.909	9.942	1.07923	0.11	0.235
1040	CG8613 OS=Drosophila melanogaster GN=CG8613 PE=1 SV=1	10.272	10.23	10.11	10.189	10.363	9.848	9.889	9.896	10.043	10.074	0.82188	-0.283	0.009
1041	Tropomyosin 1, isoform Q OS=Drosophila melanogaster GN=Tm1 PE=1 SV=1	6.601	7.636	7.283	7.737	7.431	7.278	7.843	8.597	8.327	8.165	1.62902	0.704	0.065
1042	Z band alternatively spliced PDZ-motif protein 67, isoform G OS=Drosophila melanogaster GN=Zasp67 PE=4 SV=2	10.669	10.45	10.417	10.456	10.424	9.581	8.778	9.235	9.189	9.344	0.418123	-1.258	0
1043	Calcium-independent phospholipase A2 VIA, isoform B OS=Drosophila melanogaster GN=iPLA2-VIA PE=1 SV=1	9.254	9.211	9.308	9.281	9.225	9.741	9.617	9.548	9.543	9.535	1.26663	0.341	0.001
1044	Chromatin-remodeling complex ATPase chain Iswi OS=Drosophila melanogaster GN=Iswi PE=1 SV=1	8.719	8.642	8.727	8.695	8.633	8.829	8.693	8.573	8.546	8.532	0.966606	-0.049	0.611
1046	O-glycosyltransferase OS=Drosophila melanogaster GN=sxc PE=1 SV=1	8.545	8.586	8.458	8.523	8.419	8.565	8.387	8.343	8.506	8.443	0.960595	-0.058	0.496
1047	ATP-dependent RNA helicase p62 OS=Drosophila melanogaster GN=Rm62 PE=1 SV=3	9.541	9.56	9.415	9.514	9.531	9.481	9.236	9.542	9.056	8.977	0.838568	-0.254	0.096
1048	IP16413p OS=Drosophila melanogaster GN=nrv2 PE=1 SV=1	6.456	6.271	6.197	6.191	6.564	5.722	5.97	6.393	6.505	6.827	0.964598	-0.052	0.858
1049	Facilitated trehalose transporter Tret1-1 OS=Drosophila melanogaster GN=Tret1-1 PE=1 SV=1	10.162	10.207	10.064	10.163	10.42	10.26	10.271	10.203	9.985	10.17	0.98214	-0.026	0.834
1050	FI18644p1 OS=Drosophila melanogaster GN=Hmu PE=1 SV=1	10.456	10.445	10.378	10.461	10.482	10.008	10.04	10	10.132	10.073	0.761017	-0.394	0
1051	Regeneration, isoform B OS=Drosophila melanogaster GN=rgn PE=1 SV=1	9.931	9.996	9.882	10.008	9.848	9.984	10.182	10.015	9.789	9.89	1.0274	0.039	0.73
1052	Reticulon-like protein OS=Drosophila melanogaster GN=Rtnl1 PE=1 SV=2	7.039	6.06	5.669	5.746	6.944	5.993	6.291	6.209	5.835	6.779	0.952638	-0.07	0.881
1053	Probable phosphoserine aminotransferase OS=Drosophila melanogaster GN=CG11899 PE=2 SV=1	9.935	9.752	9.913	9.889	9.856	10.088	10.384	10.142	10.356	10.282	1.30224	0.381	0.002
1054	Multiple inositol polyphosphate phosphatase 1 OS=Drosophila melanogaster GN=Mipp1 PE=1 SV=2	9.564	9.495	9.389	9.419	9.669	9.433	9.546	9.594	9.517	9.631	1.02598	0.037	0.711
1055	Carbonic anhydrase 1 OS=Drosophila melanogaster GN=CAH1 PE=1 SV=1	9.729	9.846	9.659	9.762	9.932	9.993	10.38	10.19	9.757	10.063	1.22349	0.291	0.06
1056	CG4829, isoform B OS=Drosophila melanogaster GN=CG4829 PE=1 SV=1	8.956	8.841	8.787	8.858	9.308	8.773	8.884	8.9	8.984	9.121	0.988286	-0.017	0.919
1057	MIP05539p OS=Drosophila melanogaster GN=CG31195-RA PE=1 SV=2	9.865	9.785	9.817	9.766	9.782	9.809	9.857	9.949	9.93	9.99	1.07475	0.104	0.154
1058	CG8839, isoform A OS=Drosophila melanogaster GN=CG8839 PE=1 SV=1	10.1	9.985	9.928	9.861	9.921	9.803	9.802	9.819	9.934	9.985	0.939523	-0.09	0.305
1059	FI04483p OS=Drosophila melanogaster GN=CG11414-RA PE=1 SV=1	8.376	8.386	8.435	8.466	8.378	8.416	8.41	8.478	8.518	8.37	1.02101	0.03	0.676
1060	HL01444p OS=Drosophila melanogaster GN=NimB2 PE=2 SV=1	8.439	8.135	9.015	8.384	8.441	8.733	9.03	8.839	8.85	8.878	1.30405	0.383	0.056
1061	Coronin OS=Drosophila melanogaster GN=pod1 PE=1 SV=1	4.344	4.475	4.66	4.491	4.615	5.01	4.94	4.88	5.029	4.905	1.35285	0.436	0.001
1062	Endonuclease G inhibitor, isoform A OS=Drosophila melanogaster GN=EndoGI PE=1 SV=1	9.712	9.668	9.735	9.631	9.495	9.817	9.679	9.741	9.692	9.685	1.05336	0.075	0.368
1063	CG9509, isoform A OS=Drosophila melanogaster GN=CG9509 PE=3 SV=1	9.653	9.829	9.745	9.872	9.826	9.687	10.257	9.966	9.766	9.895	1.09354	0.129	0.357
1064	S-adenosylmethionine synthase OS=Drosophila melanogaster GN=Sam-S PE=1 SV=1	9.491	9.555	9.567	9.57	9.289	9.485	9.727	9.642	9.843	9.766	1.14711	0.198	0.088
1065	3-hydroxyisobutyryl-CoA hydrolase, mitochondrial OS=Drosophila melanogaster GN=CG5044-RB PE=1 SV=1	10.939	10.783	10.565	11.037	11.486	10.508	10.691	10.762	11.044	10.95	0.888227	-0.171	0.455
1066	Cuticular protein 72Ec OS=Drosophila melanogaster GN=Cpr72Ec PE=1 SV=1	9.657	9.988	9.695	10.075	9.894	10.197	10.354	10.373	10.637	10.797	1.52626	0.61	0.004
1067	GH22474p OS=Drosophila melanogaster GN=HisRS PE=1 SV=1	6.228	6.118	6.413	6.119	6.208	6.637	6.626	6.642	6.475	6.353	1.25614	0.329	0.01
1068	Eukaryotic translation initiation factor 3 subunit I OS=Drosophila melanogaster GN=Trip1 PE=1 SV=1	9.76	9.892	9.875	10.019	9.784	9.948	9.927	9.795	10.088	9.866	1.04174	0.059	0.561
1069	E3 ubiquitin-protein ligase OS=Drosophila melanogaster GN=CG2681-RA PE=2 SV=2	9.263	9.151	8.994	9.037	9.004	9.3	9.427	9.258	8.96	9.196	1.10038	0.138	0.272
1070	RutC family protein UK114 OS=Drosophila melanogaster GN=UK114 PE=2 SV=1	10.249	10.38	10.356	10.555	10.483	10.268	10.801	10.339	10.485	10.422	1.04102	0.058	0.696
1071	Cytochrome c oxidase subunit 4, isoform A OS=Drosophila melanogaster GN=COX4 PE=1 SV=1	10.107	9.823	9.6	9.857	10.561	7.868	8.084	8.303	8.895	8.881	0.333787	-1.583	0
1072	Uncharacterized protein, isoform A OS=Drosophila melanogaster GN=Dmel\CG10289 PE=1 SV=2	9.228	9.142	9.306	9.241	9.37	8.574	8.558	8.39	8.492	8.486	0.591726	-0.757	0
1073	CG1309 OS=Drosophila melanogaster GN=Dmel\CG1309 PE=1 SV=1	9.837	9.751	9.703	9.718	9.652	9.816	9.778	9.68	9.943	9.809	1.0519	0.073	0.393
1074	GH01724p OS=Drosophila melanogaster GN=p47 PE=1 SV=1	9.459	9.444	9.366	9.354	9.411	9.482	9.495	9.478	9.43	9.367	1.03097	0.044	0.531
1075	CG6180 OS=Drosophila melanogaster GN=Dmel\CG6180 PE=1 SV=2	10.014	9.914	9.844	9.835	10.174	9.883	10.192	10.075	10.17	10.255	1.11651	0.159	0.197
1076	FI23916p1 OS=Drosophila melanogaster GN=CG13506-RA PE=1 SV=2	8.964	9.015	9.045	8.927	9.054	8.945	9.026	9.056	8.985	9.21	1.03025	0.043	0.622
1077	Draper, isoform E OS=Drosophila melanogaster GN=drpr PE=4 SV=1	8.445	8.42	8.651	8.343	8.423	8.938	9.022	8.864	8.679	8.745	1.31312	0.393	0.004
1078	Mitochondrial import inner membrane translocase subunit TIM50-C OS=Drosophila melanogaster GN=ttm50 PE=2 SV=2	9.823	9.831	9.689	9.818	9.877	9.172	9.049	9.207	9.468	9.362	0.680185	-0.556	0
1079	Histidyl-tRNA synthetase, isoform D OS=Drosophila melanogaster GN=HisRS PE=1 SV=2	3.521	3.867	3.464	2.45	3.111	3.849	3.49	3.372	3.195	3.011	1.07252	0.101	0.787
1080	Aromatic-L-amino-acid decarboxylase OS=Drosophila melanogaster GN=Ddc PE=1 SV=4	9.089	8.992	9.189	9.067	8.81	9.161	8.744	8.785	9.07	8.743	0.914465	-0.129	0.371
1081	Tropomyosin-1, isoforms 33/34 OS=Drosophila melanogaster GN=Tm1 PE=2 SV=2	7.652	7.876	8.143	7.662	8.423	7.804	7.815	8.287	7.895	8.068	1.01607	0.023	0.929
1082	Sideroflexin OS=Drosophila melanogaster GN=Sfxn1-3 PE=1 SV=1	9.956	9.904	9.853	9.811	10.093	10.066	10.415	10.327	10.308	10.428	1.30586	0.385	0.005
1083	CG8635, isoform B OS=Drosophila melanogaster GN=CG8635 PE=4 SV=1	9.276	9.257	9.316	9.303	9.347	9.204	9.249	9.046	9.178	9.087	0.903127	-0.147	0.06
1084	Flotillin-1 OS=Drosophila melanogaster GN=Flo1 PE=2 SV=1	10.309	10.255	10.147	10.292	10.471	10.168	10.311	10.402	10.457	10.506	1.05263	0.074	0.518
1085	Eukaryotic translation initiation factor 3 subunit B OS=Drosophila melanogaster GN=eIF3-S9 PE=1 SV=1	10.613	10.543	10.619	10.624	10.479	10.659	10.562	10.547	10.842	10.598	1.04681	0.066	0.484
1086	S-methyl-5'-thioadenosine phosphorylase OS=Drosophila melanogaster GN=Mtap PE=2 SV=1	10.265	10.177	10.019	10.192	10.287	10.144	10.374	10.234	10.322	10.202	1.04754	0.067	0.484
1087	Succinyl-CoA:3-ketoacid-coenzyme A transferase, mitochondrial OS=Drosophila melanogaster GN=SCOT PE=1 SV=1	9.789	9.823	9.871	9.813	9.795	10.069	10.602	10.337	10.198	10.256	1.38896	0.474	0.002
1088	SCP-containing protein A OS=Drosophila melanogaster GN=scpr-A PE=4 SV=2	8.528	8.497	8.318	8.373	8.299	8.6	8.324	8.238	8.308	7.93	0.918276	-0.123	0.422
1089	FI20063p1 OS=Drosophila melanogaster GN=Imp PE=1 SV=1	4.901	4.648	4.722	4.906	4.846	4.881	4.608	4.438	4.759	4.416	0.879649	-0.185	0.18
1090	Ferrochelatase, mitochondrial OS=Drosophila melanogaster GN=FeCh PE=2 SV=1	10.238	10.082	10.061	10.115	10.233	10.111	10.045	10.234	10.241	10.36	1.0367	0.052	0.609
1091	CG3777, isoform A OS=Drosophila melanogaster GN=EG:125H10.1 PE=1 SV=2	8.497	8.095	8.69	8.848	7.067	10.321	9.038	9.089	10.402	9.256	2.60629	1.382	0.019
1092	CG3603, isoform A OS=Drosophila melanogaster GN=CG3603 PE=1 SV=2	8.96	8.913	8.853	8.957	9.479	9.351	9.778	9.535	9.763	9.965	1.56482	0.646	0.005
1093	Serine/threonine-protein phosphatase 4 regulatory subunit 2 OS=Drosophila melanogaster GN=PPP4R2r PE=1 SV=2	9.591	9.624	9.613	9.584	9.444	9.386	9.212	9.114	9.041	8.994	0.746389	-0.422	0.002
1094	Neuromusculin, isoform E OS=Drosophila melanogaster GN=nrm PE=4 SV=1	9.344	9.3	9.286	9.452	9.471	9.169	9.216	9.271	9.115	9.27	0.893785	-0.162	0.057
1095	Serine/threonine-protein kinase Genghis Khan OS=Drosophila melanogaster GN=gek PE=1 SV=1	9.294	9.358	9.336	9.329	9.211	9.471	9.317	9.348	9.341	9.383	1.04681	0.066	0.363
1096	GEO09628p1 OS=Drosophila melanogaster GN=Nplp2 PE=2 SV=1	11.163	11.266	10.792	11.025	11.026	10.495	10.915	10.769	10.504	10.959	0.797745	-0.326	0.055
1097	CG3534 OS=Drosophila melanogaster GN=CG3534 PE=1 SV=1	9.627	9.78	9.634	9.821	10.04	9.533	9.744	9.6	9.482	9.525	0.86814	-0.204	0.098
1098	GH28815p OS=Drosophila melanogaster GN=CG31188 PE=1 SV=1	9.358	9.396	9.387	9.436	9.26	9.352	9.323	9.312	9.354	9.31	0.97468	-0.037	0.606
1099	Chondrocyte-derived ezrin-like domain containing protein ortholog, isoform G OS=Drosophila melanogaster GN=Cdep PE=1 SV=2	5.716	6.213	5.885	5.979	5.569	6.347	6.545	6.357	6.165	6.125	1.35191	0.435	0.021
1100	RE56416p OS=Drosophila melanogaster GN=CG30022;CG30023 PE=1 SV=1	9.659	9.626	9.443	9.553	9.668	9.816	9.895	9.868	9.659	9.862	1.17283	0.23	0.022
1101	Uncharacterized protein, isoform H OS=Drosophila melanogaster GN=CG45076 PE=4 SV=1	9.572	9.517	9.525	9.481	9.535	9.711	9.741	9.813	9.56	9.705	1.13288	0.18	0.031
1102	BcDNA.GH07066 OS=Drosophila melanogaster GN=mino PE=1 SV=1	9.534	9.461	9.353	9.341	9.634	9.481	9.676	9.582	9.412	9.704	1.07624	0.106	0.339
1103	Flagrante delicto Y, isoform B (Fragment) OS=Drosophila melanogaster GN=FDY PE=4 SV=3	3.533	3.58	3.705	3.967	3.713	4.595	4.985	4.255	4.667	4.188	1.78757	0.838	0.002
1104	Cytochrome c oxidase subunit OS=Drosophila melanogaster GN=COX6B PE=1 SV=2	11.046	10.68	10.234	10.691	11.697	8.465	9.105	9.456	9.841	10.097	0.359235	-1.477	0.006
1105	Uncharacterized protein OS=Drosophila melanogaster GN=CG30395 PE=1 SV=2	10.531	10.615	10.205	10.197	11.028	10.161	10.935	10.86	9.968	10.787	1.01889	0.027	0.943
1106	Histone deacetylase OS=Drosophila melanogaster GN=HDAC6 PE=1 SV=1	9.609	9.587	9.489	9.574	9.893	9.284	9.669	9.458	9.455	9.52	0.899378	-0.153	0.223
1107	Chitinase-like protein Idgf2 OS=Drosophila melanogaster GN=Idgf2 PE=1 SV=1	5.033	4.636	4.334	4.702	5.477	4.229	5.299	5.179	6.46	6.512	1.6245	0.7	0.223
1108	Uncharacterized protein, isoform F OS=Drosophila melanogaster GN=CG42354 PE=1 SV=1	9.054	9.161	8.929	8.975	9.199	9.074	9.156	9.211	9.055	9.228	1.05775	0.081	0.393
1109	Uncharacterized protein, isoform Q OS=Drosophila melanogaster GN=CG43340 PE=1 SV=1	9.076	9.122	9.042	9.085	9.252	8.783	8.887	8.883	8.735	8.834	0.817335	-0.291	0.003
1110	GH05406p OS=Drosophila melanogaster GN=mRpS30 PE=1 SV=1	9.677	9.663	9.731	9.951	9.517	9.437	9.171	9.248	9.747	9.368	0.804408	-0.314	0.056
1111	CG4095 OS=Drosophila melanogaster GN=CG4095-RA PE=2 SV=2	9.253	9.259	9.312	9.352	9.241	8.821	8.416	8.76	8.96	8.583	0.671286	-0.575	0.001
1112	Glutathione synthetase OS=Drosophila melanogaster GN=GSS PE=1 SV=2	4.134	4.182	3.717	4.253	4.346	4.354	4.724	4.67	4.602	4.891	1.43594	0.522	0.01
1113	Ectoderm-expressed 4, isoform I OS=Drosophila melanogaster GN=Ect4 PE=1 SV=1	8.988	9.013	9.026	8.873	9.051	9.156	9.194	9.245	9.193	9.303	1.17121	0.228	0.008
1114	Dolichyl-diphosphooligosaccharide--protein glycosyltransferase subunit 1 OS=Drosophila melanogaster GN=Dmel\CG33303 PE=1 SV=1	9.553	9.507	9.555	9.56	9.502	9.652	9.742	9.639	9.709	9.699	1.11188	0.153	0.026
1115	CG1440, isoform D OS=Drosophila melanogaster GN=CG1440 PE=1 SV=1	9.777	9.737	9.727	9.602	9.726	9.515	9.635	9.59	9.559	9.642	0.917004	-0.125	0.092
1116	60S ribosomal protein L5 OS=Drosophila melanogaster GN=RpL5 PE=1 SV=2	9.591	9.487	9.573	9.582	9.447	9.746	9.709	9.507	9.79	9.534	1.08749	0.121	0.209
1117	Angiotensin-converting enzyme OS=Drosophila melanogaster GN=Ance PE=1 SV=3	9.818	9.735	9.847	9.779	9.928	9.862	10.481	10.102	9.904	10.186	1.21926	0.286	0.067
1118	Phospholipase A2 activator protein, isoform A OS=Drosophila melanogaster GN=Plap PE=1 SV=1	9.885	9.827	9.862	9.872	9.816	9.921	9.713	9.692	9.964	9.774	0.972655	-0.04	0.673
1119	Hexokinase type 2 OS=Drosophila melanogaster GN=Hex-t2 PE=2 SV=4	10.166	10.133	10.031	10.051	10.154	9.744	9.272	9.359	9.834	9.301	0.657471	-0.605	0.002
1120	GEO07602p1 OS=Drosophila melanogaster GN=RpL12 PE=1 SV=1	10.649	10.517	10.559	10.62	10.58	10.67	10.799	10.585	10.583	10.691	1.05775	0.081	0.311
1121	GH04863p OS=Drosophila melanogaster GN=Dmel\CG14997 PE=1 SV=1	9.852	9.782	9.623	9.707	9.991	9.757	9.821	9.777	9.837	9.823	1.00835	0.012	0.914
1122	Aminopeptidase OS=Drosophila melanogaster GN=CG5839 PE=1 SV=1	9.317	9.207	8.632	9.011	9.14	8.849	8.919	9.241	9.301	9.603	1.08749	0.121	0.605
1123	MIP06029p OS=Drosophila melanogaster GN=Dmel\CG12512 PE=1 SV=1	9.6	9.601	9.487	9.666	9.935	9.436	9.853	9.676	9.493	9.711	0.983502	-0.024	0.882
1124	tRNA (cytosine(34)-C(5))-methyltransferase OS=Drosophila melanogaster GN=Nsun2 PE=2 SV=1	9.173	9.135	9.198	9.149	9.087	9.213	9.149	9.132	9.159	9.101	1.00139	0.002	0.98
1125	Moira, isoform B OS=Drosophila melanogaster GN=mor PE=1 SV=1	6.578	6.539	6.541	6.469	6.488	6.753	6.854	6.62	6.391	6.596	1.08673	0.12	0.288
1126	CG5112 OS=Drosophila melanogaster GN=CG5112 PE=1 SV=1	9.606	9.767	9.608	9.718	9.24	9.567	9.477	9.416	9.452	9.292	0.903127	-0.147	0.282
1127	CG1416, isoform A OS=Drosophila melanogaster GN=Dmel\CG1416 PE=1 SV=2	9.551	9.45	9.276	9.412	9.645	9.468	9.525	9.503	9.644	9.694	1.07177	0.1	0.355
1128	Rho-associated protein kinase OS=Drosophila melanogaster GN=Rok PE=1 SV=1	9.571	9.536	9.55	9.501	9.442	9.58	9.617	9.58	9.574	9.578	1.04681	0.066	0.301
1129	Crumbs, isoform C OS=Drosophila melanogaster GN=crb PE=4 SV=1	8.384	8.451	8.414	8.31	8.39	8.848	8.688	8.458	8.322	8.326	1.10038	0.138	0.324
1130	Serine protease inhibitor 88Ea OS=Drosophila melanogaster GN=Spn88Ea PE=2 SV=1	10.216	9.812	9.906	9.989	10.165	9.922	10.051	10.041	10.035	10.278	1.03383	0.048	0.731
1131	BcDNA.LD34343 OS=Drosophila melanogaster GN=wdb PE=1 SV=2	9.068	9.102	9.006	9.041	9.104	8.957	8.96	9.023	9.235	9.076	0.990343	-0.014	0.888
1132	LP07226p OS=Drosophila melanogaster GN=mge PE=1 SV=1	8.663	8.602	8.615	8.539	8.276	8.927	8.902	8.799	8.72	8.745	1.21419	0.28	0.023
1133	Unextended, isoform E OS=Drosophila melanogaster GN=uex PE=1 SV=1	9.858	9.674	9.647	9.756	9.861	10.128	9.996	10.158	10.346	10.293	1.34257	0.425	0.002
1134	RE74917p OS=Drosophila melanogaster GN=tobi PE=2 SV=1	9.262	9.668	9.987	10.102	10.361	8.977	10.062	9.086	9.543	9.42	0.72749	-0.459	0.167
1135	GH10454p OS=Drosophila melanogaster GN=CG10562 PE=1 SV=1	9.685	9.755	9.771	9.933	10.052	9.654	10.139	9.859	9.962	9.979	1.05629	0.079	0.578
1136	26S proteasome non-ATPase regulatory subunit 6 OS=Drosophila melanogaster GN=Rpn7 PE=2 SV=1	10.556	10.555	10.567	10.596	10.614	10.237	10.299	10.104	10.407	10.366	0.815072	-0.295	0.005
1137	G protein alpha s subunit, isoform E OS=Drosophila melanogaster GN=Galphas PE=1 SV=1	5.454	5.344	5.268	5.139	5.453	5.084	5.227	5.131	5.067	5.242	0.88148	-0.182	0.082
1138	Dynein light intermediate chain, isoform A OS=Drosophila melanogaster GN=Dlic PE=1 SV=2	9.465	9.397	9.425	9.383	9.394	9.353	9.432	9.448	9.434	9.5	1.01396	0.02	0.776
1139	Lysine-specific demethylase lid OS=Drosophila melanogaster GN=lid PE=1 SV=1	8.545	8.435	8.45	8.474	8.373	8.738	8.514	8.606	8.58	8.568	1.10573	0.145	0.078
1140	Protein ref(2)P OS=Drosophila melanogaster GN=ref(2)P PE=1 SV=2	9.447	9.056	8.174	8.267	8.82	8.962	9.491	8.67	8.782	8.929	1.1599	0.214	0.539
1141	GH10652p OS=Drosophila melanogaster GN=BcDNA:HL01868 PE=1 SV=1	8.684	8.417	8.698	8.74	8.59	8.747	8.776	8.662	8.333	8.334	0.961927	-0.056	0.729
1142	Alcohol dehydrogenase class-3 OS=Drosophila melanogaster GN=Fdh PE=1 SV=3	10.515	10.393	10.372	10.47	10.615	10.466	10.556	10.494	10.626	10.671	1.06437	0.09	0.321
1143	60S ribosomal protein L10a-2 OS=Drosophila melanogaster GN=RpL10Ab PE=1 SV=2	9.318	9.18	9.211	9.353	9.426	9.236	9.314	9.243	9.768	9.592	1.09657	0.133	0.379
1144	LD25575p OS=Drosophila melanogaster GN=P58IPK PE=1 SV=1	9.208	9.293	9.195	9.264	9.124	9.139	9.334	9.316	9.403	9.446	1.07998	0.111	0.232
1145	Acyl-coenzyme A oxidase OS=Drosophila melanogaster GN=Dmel\CG9527 PE=1 SV=1	10.122	9.958	9.671	9.735	9.731	9.898	10.062	10.072	10.097	10.248	1.17446	0.232	0.092
1146	Imaginal disc growth factor 2, isoform B OS=Drosophila melanogaster GN=Idgf2 PE=1 SV=1	3.85	4.06	4.245	4.025	3.388	5.234	5.387	4.875	3.986	4.34	1.8025	0.85	0.032
1147	Uncharacterized protein OS=Drosophila melanogaster GN=CG14742 PE=4 SV=1	8.349	8.298	8.2	8.182	8.007	8.169	7.891	8.198	7.898	7.912	0.874179	-0.194	0.122
1148	Inosine-5'-monophosphate dehydrogenase OS=Drosophila melanogaster GN=ras PE=1 SV=1	9.526	9.55	9.647	9.661	9.503	9.5	9.329	9.282	9.482	9.318	0.873573	-0.195	0.037
1149	Rho guanine nucleotide exchange factor 2, isoform E OS=Drosophila melanogaster GN=RhoGEF2 PE=1 SV=1	8.307	8.156	8.208	8.161	8.465	8.31	8.325	8.27	8.225	8.329	1.02314	0.033	0.746
1150	PIP82 OS=Drosophila melanogaster GN=PIP82 PE=1 SV=3	8.233	8.222	8.292	8.052	8.203	8.258	8.34	8.391	8.194	8.338	1.07475	0.104	0.227
1151	FI17828p1 OS=Drosophila melanogaster GN=Fas3 PE=2 SV=1	5.881	5.832	6.138	5.808	5.978	6.229	6.253	5.952	5.813	6.123	1.10726	0.147	0.285
1152	CG2841, isoform F OS=Drosophila melanogaster GN=CG2841 PE=1 SV=1	8.926	8.872	8.834	8.856	8.801	9.023	9.061	8.976	8.845	8.896	1.07326	0.102	0.193
1153	RE41093p OS=Drosophila melanogaster GN=ValRS-m PE=2 SV=1	9.647	9.657	9.642	9.667	9.676	8.776	8.625	8.867	8.958	8.807	0.5544	-0.851	0
1154	Proteasome subunit alpha type-3 OS=Drosophila melanogaster GN=Prosalpha7 PE=1 SV=1	10.902	11	10.841	10.97	10.934	10.781	11.016	10.882	11.002	10.922	0.993781	-0.009	0.929
1155	CG8108, isoform A OS=Drosophila melanogaster GN=BcDNA:GH07921 PE=1 SV=1	9.41	9.481	9.35	9.225	9.182	10.227	10.341	9.977	9.752	9.876	1.63014	0.705	0.001
1156	CG2233 OS=Drosophila melanogaster GN=CG2233 PE=1 SV=1	10.016	9.574	11.118	9.746	9.715	10.123	10.958	10.265	10.584	10.695	1.40542	0.491	0.206
1157	Sorting nexin OS=Drosophila melanogaster GN=Snx6 PE=1 SV=2	6.987	7.213	7.337	7.212	6.964	7.433	7.414	7.376	7.215	7.202	1.13682	0.185	0.126
1158	Sorting nexin 6, isoform B OS=Drosophila melanogaster GN=Snx6 PE=1 SV=1	5.289	5.558	5.773	5.619	5.493	5.466	5.839	5.568	5.121	5.262	0.936272	-0.095	0.626
1159	LD22662p OS=Drosophila melanogaster GN=SNF4Agamma PE=1 SV=2	8.455	8.553	8.504	8.625	8.439	8.535	8.57	8.475	8.286	8.41	0.959264	-0.06	0.529
1160	GH28857p OS=Drosophila melanogaster GN=SPE PE=1 SV=2	9.025	8.768	9.441	8.818	8.895	9.128	9.202	9.057	9.523	9.156	1.16797	0.224	0.226
1161	Chromosomal protein D1 OS=Drosophila melanogaster GN=D1 PE=1 SV=3	9.054	9.021	9.041	9.049	8.899	9.21	9.223	9.039	8.811	8.89	1.01537	0.022	0.872
1162	DE-cadherin OS=Drosophila melanogaster GN=shg PE=1 SV=2	8.926	8.991	9.159	9.024	8.914	9.333	9.289	9.209	9.241	9.144	1.18099	0.24	0.014
1163	60S ribosomal protein L13 OS=Drosophila melanogaster GN=RpL13 PE=1 SV=1	9.524	9.517	9.587	9.66	9.495	9.374	9.613	9.356	9.836	9.504	0.986233	-0.02	0.89
1164	CG4721 OS=Drosophila melanogaster GN=CG4721-RA PE=2 SV=2	9.683	9.536	9.413	9.427	9.862	9.448	9.532	9.812	9.719	10.026	1.089	0.123	0.477
1165	Blue cheese OS=Drosophila melanogaster GN=bchs PE=4 SV=4	8.312	8.351	8.209	8.195	8.223	8.327	8.27	8.282	8.11	8.144	0.978742	-0.031	0.732
1166	Hsp90 co-chaperone Cdc37 OS=Drosophila melanogaster GN=Cdc37 PE=1 SV=1	9.951	9.78	9.894	9.877	9.84	9.823	9.856	9.807	9.92	9.801	0.981459	-0.027	0.725
1167	Vacuolar protein sorting-associated protein 35 OS=Drosophila melanogaster GN=Vps35 PE=1 SV=4	9.436	9.448	9.445	9.384	9.498	9.515	9.505	9.464	9.541	9.604	1.05922	0.083	0.215
1168	Uricase OS=Drosophila melanogaster GN=Uro PE=2 SV=2	8.41	7.687	8.809	7.761	7.492	9.532	9.72	9.459	9.926	9.806	3.1536	1.657	0
1169	Putative epidermal cell surface receptor OS=Drosophila melanogaster GN=sas PE=2 SV=2	8.871	8.796	8.987	8.848	8.564	8.881	8.734	8.711	8.812	8.678	0.965936	-0.05	0.668
1170	Receptor protein-tyrosine kinase OS=Drosophila melanogaster GN=Egfr PE=3 SV=1	8.449	8.601	8.533	8.557	8.618	8.717	8.984	8.9	8.633	8.884	1.20748	0.272	0.017
1171	Z band alternatively spliced PDZ-motif protein 52, isoform P OS=Drosophila melanogaster GN=Zasp52 PE=1 SV=1	7.575	7.489	7.494	7.53	7.955	7.133	7.553	7.308	7.382	7.574	0.859161	-0.219	0.162
1172	CG2915, isoform A OS=Drosophila melanogaster GN=CG2915-RB PE=1 SV=1	9.563	9.544	9.594	9.591	9.508	9.559	9.765	9.61	9.711	9.594	1.0629	0.088	0.251
1173	Reticulon-like protein OS=Drosophila melanogaster GN=Rtnl1 PE=1 SV=1	3.556	3.317	3.126	3.505	3.094	3.728	1.682	3.035	2.539	2.574	0.656106	-0.608	0.154
1174	G protein alpha s subunit OS=Drosophila melanogaster GN=Galphas PE=2 SV=1	4.384	4.271	4.348	4.186	3.931	4.448	4.168	4.238	4.137	4.517	1.05555	0.078	0.609
1175	Lethal (2) tumorous imaginal discs, isoform D OS=Drosophila melanogaster GN=l(2)tid PE=1 SV=1	6.206	6.382	6.274	6.334	6.214	5.452	5.102	5.585	5.185	5.133	0.503478	-0.99	0
1176	FI01658p OS=Drosophila melanogaster GN=RpL23A PE=1 SV=1	10.346	10.311	10.39	10.461	10.269	10.378	10.596	10.36	10.771	10.582	1.13446	0.182	0.12
1177	Eukaryotic translation initiation factor 2 subunit 2 OS=Drosophila melanogaster GN=eIF-2beta PE=1 SV=1	9.536	9.483	9.617	9.523	9.487	9.51	9.626	9.328	9.404	9.401	0.949342	-0.075	0.405
1178	AT07459p OS=Drosophila melanogaster GN=Calx PE=1 SV=1	9.231	9.369	9.257	9.192	9.323	9.269	9.232	9.23	9.062	9.243	0.954621	-0.067	0.416
1179	Eukaryotic translation initiation factor 3 subunit E OS=Drosophila melanogaster GN=eIF3-S6 PE=1 SV=1	10.268	10.228	10.261	10.239	10.089	10.267	10.21	10.053	10.262	10.108	0.97468	-0.037	0.686
1180	Uncharacterized protein, isoform A OS=Drosophila melanogaster GN=anon-WO0172774.89 PE=1 SV=1	9.683	9.535	9.602	9.578	9.995	9.819	9.802	9.743	10.092	9.864	1.13682	0.185	0.174
1181	Ectopic P granules protein 5 homolog OS=Drosophila melanogaster GN=CG14299 PE=1 SV=2	8.326	8.297	8.317	8.215	8.306	8.404	8.288	8.265	8.539	8.288	1.04608	0.065	0.469
1182	RE14039p OS=Drosophila melanogaster GN=CG6166 PE=2 SV=1	9.38	9.465	9.18	9.356	9.599	9.327	9.399	9.463	9.385	9.539	1.01819	0.026	0.829
1183	GM23292p OS=Drosophila melanogaster GN=ND-B17 PE=1 SV=1	12.024	11.883	11.826	11.95	12.128	10.323	10.376	10.489	10.656	10.525	0.356506	-1.488	0
1184	Superoxide dismutase OS=Drosophila melanogaster GN=Sod2 PE=3 SV=1	10.725	10.604	10.548	10.685	10.855	9.757	9.893	10.001	10.054	10.127	0.608361	-0.717	0
1185	Signal recognition particle 19 kDa protein OS=Drosophila melanogaster GN=Srp19 PE=2 SV=2	8.105	8.42	8.427	8.437	7.916	8.391	8.407	8.448	8.401	8.176	1.07475	0.104	0.502
1186	CG5167 OS=Drosophila melanogaster GN=CG5167 PE=1 SV=1	9.773	9.782	9.55	9.616	9.923	9.464	9.536	9.437	9.459	9.508	0.842063	-0.248	0.024
1187	Pak3, isoform D OS=Drosophila melanogaster GN=Pak3 PE=1 SV=1	9.752	9.773	9.814	9.776	9.748	9.959	9.995	9.883	9.795	9.84	1.08824	0.122	0.103
1188	CG7322, isoform A OS=Drosophila melanogaster GN=CG7322 PE=1 SV=1	10.068	10.117	10.095	10.528	10.892	9.406	10.163	9.732	9.879	9.899	0.695441	-0.524	0.048
1189	CG6140, isoform A OS=Drosophila melanogaster GN=Dmel\CG6140 PE=2 SV=1	9.566	9.524	9.611	9.615	9.516	9.159	8.753	8.82	9.286	8.737	0.652477	-0.616	0.002
1190	AT07585p OS=Drosophila melanogaster GN=Dmel\CG12493 PE=2 SV=2	9.109	9.193	9.176	9.255	9.278	9.282	9.373	9.532	9.248	9.073	1.07103	0.099	0.383
1191	CG9436 OS=Drosophila melanogaster GN=CG9436 PE=1 SV=1	9.363	9.55	9.389	9.501	9.598	9.046	9.433	9.26	9.161	9.317	0.848508	-0.237	0.045
1192	CG8963, isoform A OS=Drosophila melanogaster GN=CG8963 PE=1 SV=1	8.969	8.93	9.025	8.962	8.753	9.188	8.981	9.041	9.033	8.952	1.07998	0.111	0.237
1193	CG5886 OS=Drosophila melanogaster GN=CG5886 PE=1 SV=1	9.149	9.347	9.477	9.597	8.826	9.671	9.311	9.034	9.515	9.158	1.04102	0.058	0.812
1194	CG5174, isoform O OS=Drosophila melanogaster GN=CG5174 PE=1 SV=1	3.933	3.568	4.058	3.843	4.051	3.891	3.82	3.798	4.426	3.846	1.04681	0.066	0.746
1195	HL08110p OS=Drosophila melanogaster GN=Zasp66 PE=1 SV=1	7.031	7.099	7.003	6.933	7.425	5.663	6.522	6.297	5.796	6.466	0.517991	-0.949	0.002
1196	Cuticular protein 49Ab OS=Drosophila melanogaster GN=Cpr49Ab PE=4 SV=1	10.272	10.205	10.081	10.335	10.535	10.222	10.537	10.596	10.258	10.7	1.13053	0.177	0.259
1197	Ran GTPase activating protein, isoform C OS=Drosophila melanogaster GN=RanGAP PE=1 SV=1	8.974	8.834	8.879	8.931	9.048	8.894	8.79	8.809	9.038	8.976	0.978063	-0.032	0.748
1198	[Pyruvate dehydrogenase (acetyl-transferring)] kinase, mitochondrial OS=Drosophila melanogaster GN=Pdk PE=2 SV=2	9.604	9.523	9.571	9.468	9.594	8.968	9.09	8.846	8.96	9.018	0.670821	-0.576	0
1199	CG9934, isoform A OS=Drosophila melanogaster GN=Ube4b PE=1 SV=1	9.673	9.709	9.764	9.7	9.38	9.912	9.634	9.671	9.699	9.497	1.02598	0.037	0.79
1200	LD33695p OS=Drosophila melanogaster GN=pins PE=1 SV=1	7.599	7.654	7.471	7.347	7.764	7.826	7.802	7.781	7.739	7.758	1.1599	0.214	0.053
1201	Heterogeneous nuclear ribonucleoprotein at 87F, isoform C OS=Drosophila melanogaster GN=Hrb87F PE=1 SV=1	8.695	8.502	8.738	8.783	8.573	8.277	8.259	8.168	8.194	8.013	0.718968	-0.476	0.001
1202	Chromator, isoform A OS=Drosophila melanogaster GN=Chro PE=1 SV=1	9.71	9.621	9.598	9.646	9.833	9.44	9.495	9.325	9.169	9.284	0.790589	-0.339	0.006
1203	SD06839p OS=Drosophila melanogaster GN=Dmel\CG17597 PE=1 SV=2	9.335	9.217	9.01	8.979	8.936	9.208	9.246	9.035	8.847	9.136	0.999307	-0.001	0.994
1204	CG9330 OS=Drosophila melanogaster GN=Dmel\CG9330 PE=1 SV=1	9.36	9.345	9.339	9.368	9.393	9.042	9.094	9.055	9.167	9.137	0.833931	-0.262	0.002
1205	Secretory 24CD, isoform C OS=Drosophila melanogaster GN=Sec24CD PE=1 SV=1	10.793	10.8	10.754	10.802	10.699	10.688	10.757	10.583	10.762	10.715	0.953299	-0.069	0.348
1206	Protein seele OS=Drosophila melanogaster GN=sel PE=1 SV=1	9.458	9.462	9.556	9.549	9.35	9.545	9.611	9.65	9.81	9.714	1.14155	0.191	0.046
1207	40S ribosomal protein S19a OS=Drosophila melanogaster GN=RpS19a PE=1 SV=3	10.391	10.391	10.448	10.456	10.256	10.462	10.571	10.415	10.721	10.455	1.09885	0.136	0.166
1208	CG8003, isoform A OS=Drosophila melanogaster GN=Dmel\CG8003 PE=1 SV=1	8.961	8.857	8.917	8.957	8.872	8.974	8.87	8.876	9.099	8.954	1.02954	0.042	0.619
1209	Armadillo repeat-containing protein 6 homolog OS=Drosophila melanogaster GN=CG5721 PE=1 SV=1	9.658	9.726	9.704	9.691	9.625	9.436	9.349	9.249	9.394	9.246	0.786762	-0.346	0.001
1210	Ornithine aminotransferase, mitochondrial OS=Drosophila melanogaster GN=Oat PE=2 SV=1	9.791	9.853	9.815	9.987	9.628	10.731	10.75	10.456	10.773	10.525	1.78015	0.832	0
1211	Annexin OS=Drosophila melanogaster GN=AnxB9 PE=1 SV=1	10.825	10.652	10.688	10.527	10.738	10.644	10.778	10.598	10.77	10.786	1.0203	0.029	0.776
1212	Muscle LIM protein at 60A, isoform F OS=Drosophila melanogaster GN=Mlp60A PE=1 SV=1	8.599	8.404	8.333	8.37	8.766	8.403	8.816	8.872	8.608	8.994	1.18427	0.244	0.154
1213	CG3626 OS=Drosophila melanogaster GN=CG3626-RA PE=1 SV=3	9.803	9.619	9.662	9.756	9.689	9.599	9.373	9.498	9.572	9.63	0.888227	-0.171	0.063
1214	CG9498 OS=Drosophila melanogaster GN=Dmel\CG9498 PE=1 SV=1	9.418	9.672	9.467	9.617	9.506	9.093	9.881	9.375	9.372	9.46	0.933033	-0.1	0.578
1215	Transporter OS=Drosophila melanogaster GN=Gat PE=1 SV=4	9.85	9.996	9.954	9.868	9.919	9.839	9.869	9.99	9.752	9.779	0.951318	-0.072	0.387
1216	Nuclear pore complex protein Nup50 OS=Drosophila melanogaster GN=Nup50 PE=2 SV=1	9.532	9.432	9.487	9.465	9.465	9.092	9.04	9.1	9.22	9.089	0.774856	-0.368	0
1217	LD44376p OS=Drosophila melanogaster GN=LeuRS-m PE=1 SV=1	9.459	9.539	9.457	9.386	9.366	9.714	9.508	9.708	9.593	9.663	1.14472	0.195	0.028
1218	Signal recognition particle 54 kDa protein OS=Drosophila melanogaster GN=Srp54k PE=1 SV=1	10.057	10.079	10.033	10.127	9.808	10.156	10.097	10.082	10.173	10.118	1.07475	0.104	0.249
1219	FI19443p1 OS=Drosophila melanogaster GN=lqf PE=1 SV=3	9.194	9.182	9.166	9.206	9.302	9.164	9.269	9.249	9.286	9.324	1.03383	0.048	0.508
1220	BcDNA.GH02439 OS=Drosophila melanogaster GN=BcDNA.GH02439 PE=1 SV=1	8.047	8.009	8.148	8.104	8.051	8.433	8.501	8.53	8.157	8.384	1.25614	0.329	0.006
1221	Protein borderless OS=Drosophila melanogaster GN=bdl PE=1 SV=1	9.684	9.748	9.63	9.798	9.826	9.287	9.482	9.437	9.442	9.654	0.825305	-0.277	0.014
1222	No on or off transient A, isoform B OS=Drosophila melanogaster GN=nonA PE=1 SV=1	7.567	7.694	7.588	7.58	7.658	8.061	8.099	7.64	7.784	7.853	1.20581	0.27	0.038
1223	Cullin homolog 1 OS=Drosophila melanogaster GN=Cul1 PE=1 SV=2	8.596	8.614	8.7	8.638	8.715	8.75	8.483	8.555	8.925	8.814	1.03742	0.053	0.67
1224	THUMP domain-containing protein 1 homolog OS=Drosophila melanogaster GN=CG15014 PE=1 SV=2	9.069	9.034	9.095	9.126	9.115	9.254	9.122	9.245	9.549	9.302	1.15429	0.207	0.056
1225	RE12410p OS=Drosophila melanogaster GN=CG10911 PE=2 SV=1	10.116	9.661	10.669	9.897	10.002	10.245	11.062	10.749	10.437	10.919	1.52944	0.613	0.038
1226	LD05345p OS=Drosophila melanogaster GN=eIF2Bdelta PE=1 SV=1	8.809	8.9	8.886	8.928	8.765	9.255	9.029	8.924	9.151	8.996	1.1591	0.213	0.04
1227	Seminal fluid protein 78E, isoform B OS=Drosophila melanogaster GN=Sfp78E PE=4 SV=1	9.594	9.833	9.532	9.583	10.318	9.288	10.126	10.178	9.369	10.039	1.0196	0.028	0.936
1228	CG9784, isoform C OS=Drosophila melanogaster GN=CG9784 PE=1 SV=1	8.774	8.848	8.78	8.676	8.796	8.937	8.977	8.954	8.906	8.934	1.12272	0.167	0.024
1229	Actin-related protein 1 OS=Drosophila melanogaster GN=Arp1 PE=2 SV=2	10.004	9.916	9.898	9.962	10.135	9.701	9.884	9.975	9.995	10.135	0.96929	-0.045	0.714
1230	Cathepsin B1, isoform A OS=Drosophila melanogaster GN=CtsB1 PE=1 SV=1	9.011	8.971	9.239	9.194	9.132	9.286	9.462	9.324	9.442	9.366	1.20247	0.266	0.012
1231	Phenylalanine--tRNA ligase alpha subunit OS=Drosophila melanogaster GN=alpha-PheRS PE=1 SV=1	9.971	9.977	9.98	9.977	9.853	9.875	9.796	9.736	9.797	9.696	0.887611	-0.172	0.031
1232	CG10206-PA OS=Drosophila melanogaster GN=nop5 PE=1 SV=2	9.32	9.131	9.171	9.239	9.336	9.691	9.562	9.595	9.686	9.589	1.30586	0.385	0.001
1233	CG8520, isoform A OS=Drosophila melanogaster GN=CG8520 PE=1 SV=1	10.262	10.364	10.239	10.247	10.331	9.128	8.81	9.261	9.043	9.241	0.437696	-1.192	0
1234	Calcium-dependent secretion activator OS=Drosophila melanogaster GN=Cadps PE=1 SV=3	9.238	9.155	9.079	9.086	9.183	9.177	9.127	9.053	8.966	9.097	0.955945	-0.065	0.425
1235	IP12282p OS=Drosophila melanogaster GN=CG31104 PE=2 SV=2	9.538	9.664	9.495	9.754	9.886	9.939	10.558	10.192	10.18	10.043	1.42899	0.515	0.007
1236	Ubiquitin carboxyl-terminal hydrolase OS=Drosophila melanogaster GN=Uch PE=3 SV=1	9.868	9.836	9.943	9.962	9.785	9.936	9.825	9.919	9.929	9.797	1.00139	0.002	0.981
1237	Arrestin 1, isoform B OS=Drosophila melanogaster GN=Arr1 PE=4 SV=1	9.71	9.938	9.744	9.874	10.004	9.927	9.875	10.081	9.966	10.092	1.09733	0.134	0.191
1238	CG6523 OS=Drosophila melanogaster GN=Grx3 PE=1 SV=1	9.829	9.777	9.784	9.947	9.943	9.373	9.436	9.291	9.431	9.316	0.713507	-0.487	0
1239	60S ribosomal protein L18a OS=Drosophila melanogaster GN=RpL18A PE=1 SV=1	10.093	10.18	10.198	10.231	10.045	10.376	10.354	10.204	10.473	10.257	1.13524	0.183	0.053
1240	CG8778 OS=Drosophila melanogaster GN=CG8778 PE=1 SV=1	10.318	10.058	10.101	10.185	10.589	9.767	9.933	9.995	10.241	10.471	0.889459	-0.169	0.393
1241	CG1665 OS=Drosophila melanogaster GN=CG1665-RA PE=1 SV=1	9.628	9.464	9.541	9.574	9.406	9.773	10.017	10.061	10.222	10.19	1.44393	0.53	0.001
1242	CG5174, isoform M OS=Drosophila melanogaster GN=CG5174 PE=1 SV=2	5.374	5.271	5.147	5.232	5.317	5.51	5.776	5.877	5.502	5.837	1.3491	0.432	0.004
1243	Superoxide dismutase [Cu-Zn] OS=Drosophila melanogaster GN=Ccs PE=1 SV=1	8.635	8.602	8.522	8.563	8.833	8.53	8.541	8.394	8.314	8.554	0.892547	-0.164	0.118
1244	Choline O-acetyltransferase OS=Drosophila melanogaster GN=Cha PE=1 SV=3	8.684	8.624	8.492	8.632	8.849	8.574	8.637	8.795	8.901	8.905	1.07624	0.106	0.385
1245	Host cell factor OS=Drosophila melanogaster GN=Hcf PE=1 SV=2	8.578	8.398	8.582	8.472	8.377	8.671	8.482	8.527	8.765	8.519	1.07998	0.111	0.27
1246	Cytochrome P450-4e2, isoform B OS=Drosophila melanogaster GN=Cyp4e2 PE=3 SV=1	8.758	8.833	8.71	8.745	8.955	9.017	9.285	9.198	9.016	9.359	1.29684	0.375	0.006
1247	RuvB-like helicase 1 OS=Drosophila melanogaster GN=pont PE=1 SV=1	9.749	9.554	9.515	9.74	10.104	9.248	9.449	9.785	10.25	10.128	1.02811	0.04	0.896
1248	CG4598, isoform A OS=Drosophila melanogaster GN=Dmel\CG4598 PE=1 SV=2	9.619	9.55	9.431	9.556	9.589	9.538	9.69	9.623	9.649	9.735	1.07029	0.098	0.22
1249	Uncharacterized protein, isoform A OS=Drosophila melanogaster GN=Dmel\CG10512 PE=1 SV=1	9.655	9.553	9.545	9.698	9.937	9.228	9.583	9.393	9.829	9.857	0.933033	-0.1	0.593
1250	Acyl-coenzyme A oxidase OS=Drosophila melanogaster GN=Acox57D-p PE=1 SV=1	9.7	9.76	9.715	9.666	9.54	9.775	9.904	9.718	9.745	9.794	1.07998	0.111	0.179
1251	CG4882, isoform A OS=Drosophila melanogaster GN=CG4882 PE=1 SV=1	9.561	9.595	9.741	9.813	9.359	9.303	9.007	9.018	9.273	9.078	0.717972	-0.478	0.004
1252	Fat-spondin OS=Drosophila melanogaster GN=fat-spondin PE=1 SV=1	8.825	8.627	9.239	8.622	8.824	9.606	9.764	9.579	9.58	9.578	1.73388	0.794	0
1253	Uncharacterized protein OS=Drosophila melanogaster GN=CT18701 PE=4 SV=4	7.726	7.885	8.035	7.87	7.737	8.683	8.623	8.602	8.527	8.585	1.68529	0.753	0
1254	Viking, isoform A OS=Drosophila melanogaster GN=vkg PE=1 SV=1	8.388	8.682	8.841	8.61	9.034	8.617	8.807	9.156	8.56	8.732	1.04464	0.063	0.761
1255	GH05679p OS=Drosophila melanogaster GN=Tep3 PE=1 SV=2	9.108	8.869	8.803	8.858	9.004	8.965	8.87	9.086	9.028	9.189	1.07103	0.099	0.367
1256	FI18849p1 OS=Drosophila melanogaster GN=PNPase PE=2 SV=2	8.935	8.93	8.862	8.882	8.902	8.721	8.56	8.695	8.643	8.647	0.841479	-0.249	0.003
1257	Blanks OS=Drosophila melanogaster GN=blanks PE=1 SV=1	9.738	9.653	9.672	9.714	9.778	9.785	10.025	10.191	9.82	9.729	1.1479	0.199	0.107
1258	Importin subunit alpha OS=Drosophila melanogaster GN=Kap-alpha3 PE=1 SV=1	9.331	9.302	9.125	9.235	9.429	8.942	9.074	9.099	9.22	9.138	0.876606	-0.19	0.066
1259	40S ribosomal protein S7 OS=Drosophila melanogaster GN=RpS7 PE=1 SV=1	10.622	10.639	10.612	10.897	10.61	10.536	10.655	10.421	10.739	10.419	0.918913	-0.122	0.295
1260	Transgelin OS=Drosophila melanogaster GN=Chd64 PE=1 SV=2	9.576	9.444	9.577	9.295	9.469	9.589	9.776	9.757	9.633	9.917	1.19997	0.263	0.027
1261	FI06314p OS=Drosophila melanogaster GN=RhoGAP92B PE=1 SV=1	6.601	6.606	6.524	6.568	6.52	6.759	6.602	6.781	6.737	6.754	1.11961	0.163	0.035
1262	Ciboulot, isoform A OS=Drosophila melanogaster GN=cib PE=1 SV=1	9.832	9.556	9.799	9.54	9.469	9.945	10.114	9.803	9.887	9.919	1.22688	0.295	0.026
1263	Trehalose 6-phosphate phosphatase OS=Drosophila melanogaster GN=CG5171-RC PE=1 SV=1	9.873	9.75	9.527	9.768	10.359	9.375	9.822	9.656	9.686	9.617	0.856188	-0.224	0.255
1264	Fondue, isoform B OS=Drosophila melanogaster GN=fon PE=1 SV=1	7.084	6.54	6.96	6.958	6.672	5.847	5.945	6.001	6.409	6.32	0.599155	-0.739	0.002
1265	Nucleoside diphosphate kinase OS=Drosophila melanogaster GN=awd PE=1 SV=1	10.803	10.682	10.614	10.649	10.834	10.562	10.714	10.44	10.403	10.414	0.864537	-0.21	0.056
1266	Fas-associated factor, isoform A OS=Drosophila melanogaster GN=Faf2 PE=1 SV=1	8.837	8.835	8.77	8.718	8.708	8.866	8.802	8.659	8.848	8.677	0.997923	-0.003	0.979
1267	Fatty acyl-CoA reductase OS=Drosophila melanogaster GN=CG2858 PE=2 SV=2	9.048	9.366	9.057	9.272	8.239	8.646	8.513	8.465	8.691	8.411	0.731536	-0.451	0.085
1268	ADP-ribosylation factor GTPase activating protein 1, isoform A OS=Drosophila melanogaster GN=ArfGAP1 PE=1 SV=1	8.321	8.369	8.358	8.321	8.069	8.405	8.448	8.136	8.198	8.035	0.970634	-0.043	0.76
1269	Dipeptidase B, isoform A OS=Drosophila melanogaster GN=Dip-B PE=1 SV=2	9.71	9.306	9.039	8.933	9.383	9.675	10.099	10.302	10.178	10.536	1.84548	0.884	0.003
1270	CG4377 OS=Drosophila melanogaster GN=CG4377 PE=2 SV=1	9.084	9.124	9.3	9.612	9.914	9.451	10.376	9.772	9.775	9.769	1.33978	0.422	0.121
1271	Cuticular protein 97Eb OS=Drosophila melanogaster GN=Cpr97Eb PE=2 SV=2	9.963	9.661	9.996	9.903	9.251	9.901	9.289	9.619	9.895	9.678	0.946714	-0.079	0.744
1272	CG9389 OS=Drosophila melanogaster GN=142336_at PE=2 SV=1	8.496	8.616	8.348	8.374	8.465	8.264	7.775	7.983	8.172	7.764	0.722966	-0.468	0.007
1273	Glutathione peroxidase OS=Drosophila melanogaster GN=PHGPx PE=1 SV=1	10.955	10.723	10.629	10.848	10.994	10.676	10.808	10.722	10.745	10.989	0.971307	-0.042	0.747
1274	Accessory gland-specific peptide 26Aa OS=Drosophila melanogaster GN=Acp26Aa PE=2 SV=2	10.207	10.256	9.857	9.879	10.616	9.846	10.676	10.631	9.982	10.599	1.13603	0.184	0.52
1275	RE32325p OS=Drosophila melanogaster GN=CG11407 PE=2 SV=2	8.797	9.105	9.066	9.153	8.921	9.528	9.739	9.488	9.812	9.507	1.52203	0.606	0.001
1276	CG3061 OS=Drosophila melanogaster GN=CG3061 PE=1 SV=1	9.363	9.495	9.457	9.453	9.187	9.512	9.558	9.419	9.447	9.392	1.05336	0.075	0.439
1277	Putative polypeptide N-acetylgalactosaminyltransferase 9 OS=Drosophila melanogaster GN=pgant9 PE=2 SV=2	9.554	9.715	9.622	9.558	9.424	9.85	9.916	9.906	9.768	9.812	1.21083	0.276	0.007
1278	CG7556, isoform A OS=Drosophila melanogaster GN=CG7556 PE=1 SV=1	8.654	8.616	8.659	8.659	8.54	8.607	8.568	8.496	8.656	8.61	0.973329	-0.039	0.602
1279	Probable glutamine--tRNA ligase OS=Drosophila melanogaster GN=Aats-gln PE=2 SV=1	10.349	10.284	10.041	10.353	10.638	9.955	10.027	9.941	10.216	10.173	0.82932	-0.27	0.071
1280	LD34388p OS=Drosophila melanogaster GN=Dmel\CG31650 PE=1 SV=1	9.487	9.424	9.513	9.531	9.467	9.434	9.506	9.42	9.284	9.319	0.938221	-0.092	0.241
1281	Ebony OS=Drosophila melanogaster GN=e PE=1 SV=1	8.795	8.724	8.7	8.679	8.86	8.977	8.86	8.983	9.02	9.031	1.16716	0.223	0.012
1282	Fatty acyl-CoA reductase OS=Drosophila melanogaster GN=CG5065 PE=3 SV=1	9.841	9.772	9.848	9.775	9.735	9.553	9.718	9.694	9.53	9.599	0.885768	-0.175	0.034
1283	Molecule interacting with CasL, isoform L OS=Drosophila melanogaster GN=Mical PE=4 SV=1	7.657	7.681	7.856	7.799	7.363	8.072	7.9	7.69	7.96	7.718	1.14631	0.197	0.18
1284	SD02021p OS=Drosophila melanogaster GN=Dmel\CG10672 PE=1 SV=1	10.064	10.123	9.896	9.923	10.046	10.249	10.272	10.183	10.228	10.34	1.18427	0.244	0.01
1285	Alpha-Esterase-5, isoform A OS=Drosophila melanogaster GN=alpha-Est5 PE=1 SV=1	8.134	8.155	8.003	8.266	8.626	8.394	8.821	8.759	8.956	9.005	1.46409	0.55	0.011
1286	Dipeptidase C, isoform A OS=Drosophila melanogaster GN=Dip-C PE=1 SV=2	9.599	9.68	9.691	9.765	9.349	9.747	9.79	9.659	9.877	9.789	1.11419	0.156	0.167
1287	Protein hook OS=Drosophila melanogaster GN=hook PE=1 SV=2	8.451	8.506	8.445	8.378	8.48	8.712	8.717	8.649	8.504	8.515	1.12272	0.167	0.056
1288	Smooth, isoform T OS=Drosophila melanogaster GN=sm PE=1 SV=1	7.918	7.915	8.061	8.131	7.92	7.58	7.741	7.388	7.705	7.542	0.75891	-0.398	0.003
1289	Replication protein A 70 kDa DNA-binding subunit OS=Drosophila melanogaster GN=RpA-70 PE=1 SV=1	9.332	9.285	9.333	9.395	9.245	9.824	9.726	9.615	9.735	9.69	1.31951	0.4	0
1290	Protein enhancer of sevenless 2B OS=Drosophila melanogaster GN=drk PE=1 SV=1	9.698	9.55	9.64	9.707	9.872	9.463	9.602	9.572	9.508	9.664	0.912565	-0.132	0.168
1291	Polypeptide N-acetylgalactosaminyltransferase 5 OS=Drosophila melanogaster GN=pgant5 PE=2 SV=2	9.18	9.12	9.216	9.159	9.012	9.444	9.472	9.322	9.315	9.325	1.17936	0.238	0.011
1292	Kinesin heavy chain 73, isoform E OS=Drosophila melanogaster GN=Khc-73 PE=1 SV=1	8.674	8.526	8.765	8.721	8.596	8.663	8.772	8.653	8.646	8.659	1.01537	0.022	0.806
1293	CG4363 OS=Drosophila melanogaster GN=CG4363 PE=4 SV=1	9.111	9.176	9.265	9.72	9.72	7.117	8.251	7.366	7.551	7.705	0.287175	-1.8	0
1294	Diacylglycerol kinase OS=Drosophila melanogaster GN=CG31140 PE=1 SV=1	9.322	9.323	9.203	9.208	9.253	9.216	9.249	9.146	9.054	9.191	0.938872	-0.091	0.239
1295	Misshapen, isoform A OS=Drosophila melanogaster GN=msn PE=1 SV=3	7.959	7.641	7.837	7.647	7.581	7.702	7.608	7.735	8.002	7.957	1.04826	0.068	0.638
1296	GH07286p OS=Drosophila melanogaster GN=CG13850 PE=1 SV=3	9.464	9.346	9.489	9.505	9.303	8.988	8.895	8.977	8.979	9.027	0.733058	-0.448	0
1297	Rat1 5'-3' exoribonuclease, isoform B OS=Drosophila melanogaster GN=Rat1 PE=1 SV=1	8.197	8.081	8.193	8.212	8.043	8.212	7.997	7.907	8.14	7.859	0.918276	-0.123	0.255
1298	CG3702, isoform A OS=Drosophila melanogaster GN=Dmel\CG3702 PE=1 SV=2	9.424	9.42	9.415	9.409	9.143	9.707	9.755	9.724	9.72	9.669	1.27721	0.353	0.002
1299	CG2767 OS=Drosophila melanogaster GN=CG2767 PE=1 SV=1	9.776	9.718	9.637	9.784	9.868	9.458	9.663	9.595	9.7	9.809	0.925304	-0.112	0.272
1300	Microtubule-associated protein Jupiter OS=Drosophila melanogaster GN=Jupiter PE=1 SV=2	8.846	8.719	8.98	8.965	8.595	8.794	8.849	8.758	8.997	8.698	0.998615	-0.002	0.99
1301	40S ribosomal protein S18 OS=Drosophila melanogaster GN=RpS18 PE=1 SV=1	10.251	10.165	10.039	10.329	10.357	9.871	10.041	9.9	10.271	10.096	0.875391	-0.192	0.128
1302	GH18329p OS=Drosophila melanogaster GN=papi PE=1 SV=1	9.237	9.192	9.219	9.217	9.297	9.128	9.035	9.014	9.044	9.131	0.893785	-0.162	0.027
1303	Nicalin OS=Drosophila melanogaster GN=Q9VKZ7_DROME PE=1 SV=2	9.577	9.503	9.465	9.549	9.733	9.754	9.762	9.735	9.986	9.988	1.21419	0.28	0.017
1304	Mannose-6-phosphate isomerase OS=Drosophila melanogaster GN=CG8417 PE=1 SV=1	10.24	10.361	10.263	10.289	10.396	10.112	10.267	10.105	10.022	10.021	0.86814	-0.204	0.028
1305	CG5144 OS=Drosophila melanogaster GN=Dmel\CG5144 PE=3 SV=1	9.384	9.553	9.794	9.697	9.286	9.508	9.131	9.469	9.505	9.072	0.866938	-0.206	0.235
1306	Phosphoacetylglucosamine mutase OS=Drosophila melanogaster GN=nst PE=1 SV=1	9.295	9.27	9.463	9.314	9.142	9.446	9.342	9.287	9.503	9.448	1.07773	0.108	0.263
1307	Odorant-binding protein 99c, isoform B OS=Drosophila melanogaster GN=Obp99c PE=1 SV=1	4.551	4.618	5.572	5.395	4.346	5.576	6.295	6.186	4.845	5.397	1.69702	0.763	0.09
1308	Eip55E, isoform A OS=Drosophila melanogaster GN=Eip55E PE=1 SV=1	9.679	9.621	9.799	9.841	9.809	9.524	9.84	9.49	9.655	9.685	0.925946	-0.111	0.301
1309	Trio, isoform A OS=Drosophila melanogaster GN=trio PE=1 SV=1	7.674	7.832	8.012	7.931	7.822	8.303	8.128	8.081	7.812	7.789	1.1235	0.168	0.256
1310	Putative fatty acyl-CoA reductase CG8306 OS=Drosophila melanogaster GN=CG8306 PE=2 SV=1	10.055	10.023	9.885	9.92	10.089	9.921	10.128	10.078	10.213	10.199	1.08222	0.114	0.246
1311	GH08978p OS=Drosophila melanogaster GN=CG10126-RB PE=1 SV=2	10.096	9.927	10.077	10.012	10.035	10.317	10.607	10.409	10.337	10.41	1.30767	0.387	0.001
1312	26S proteasome non-ATPase regulatory subunit 9 OS=Drosophila melanogaster GN=CG9588 PE=1 SV=1	9.225	9.216	9.12	9.222	9.181	8.901	8.993	9.026	9.007	9.041	0.871154	-0.199	0.011
1313	CG2254 OS=Drosophila melanogaster GN=CG2254 PE=1 SV=1	10.662	10.846	10.55	10.626	10.706	10.506	10.761	10.675	10.438	10.595	0.944092	-0.083	0.448
1314	Adenylosuccinate lyase OS=Drosophila melanogaster GN=AdSL PE=1 SV=1	8.893	8.875	8.899	9.077	9.309	8.983	9.469	9.057	9.435	9.236	1.16959	0.226	0.173
1315	Scaffold attachment factor B, isoform B OS=Drosophila melanogaster GN=Saf-B PE=1 SV=2	8.129	8.408	8.267	8.256	8.146	8.648	8.649	8.657	8.3	8.367	1.21672	0.283	0.036
1316	Methionine aminopeptidase OS=Drosophila melanogaster GN=CG13630 PE=1 SV=1	9.437	9.578	9.598	9.677	9.224	9.769	9.691	9.589	9.677	9.414	1.09051	0.125	0.349
1317	LD28489p OS=Drosophila melanogaster GN=Dmel\CG31793 PE=2 SV=1	8.339	8.283	8.265	8.203	8.246	9.027	8.987	8.807	8.775	8.812	1.5305	0.614	0
1318	Eukaryotic translation initiation factor 2A OS=Drosophila melanogaster GN=CG7414 PE=1 SV=1	9.719	9.646	9.814	9.814	9.497	9.662	9.531	9.608	9.753	9.471	0.937571	-0.093	0.396
1319	CG1324, isoform A OS=Drosophila melanogaster GN=CG1324 PE=2 SV=1	10.036	10.08	10.015	9.974	9.833	8.837	8.464	9.06	8.918	8.646	0.434371	-1.203	0
1320	CG2082, isoform B OS=Drosophila melanogaster GN=BcDNA:GH02439 PE=1 SV=1	5.666	5.492	5.421	5.535	5.691	5.507	5.334	5.651	5.748	5.668	1.01466	0.021	0.883
1321	Raptor, isoform B OS=Drosophila melanogaster GN=raptor PE=1 SV=2	8.036	8.096	8.142	8.125	8.206	8.306	8.336	8.193	8.168	8.172	1.08222	0.114	0.152
1322	Mo25, isoform B OS=Drosophila melanogaster GN=Mo25 PE=4 SV=1	9.413	9.189	9.166	9.268	9.532	9.021	9.24	9.421	9.86	9.741	1.1042	0.143	0.511
1323	CG7332, isoform B OS=Drosophila melanogaster GN=CG7332 PE=4 SV=1	8.666	8.498	8.633	8.589	8.642	8.444	8.49	8.361	8.422	8.368	0.877214	-0.189	0.019
1324	FI17814p1 OS=Drosophila melanogaster GN=plx PE=2 SV=1	9.64	9.629	9.639	9.711	9.72	8.981	8.822	8.85	9.047	9.048	0.60794	-0.718	0
1325	Canoe, isoform E OS=Drosophila melanogaster GN=cno PE=1 SV=2	7.868	7.828	7.75	7.838	7.733	7.845	7.801	7.776	7.775	7.91	1.01255	0.018	0.82
1326	Probable pseudouridine-5'-phosphatase OS=Drosophila melanogaster GN=Gs1l PE=2 SV=2	7.48	7.453	7.419	7.418	7.662	6.756	6.819	7.011	7.012	7.239	0.697855	-0.519	0.002
1327	Transglutaminase, isoform B OS=Drosophila melanogaster GN=Tg PE=1 SV=1	9.598	9.456	9.354	9.4	9.781	9.34	9.48	9.414	9.388	9.556	0.944747	-0.082	0.495
1328	CCHC-type zinc finger protein CG3800 OS=Drosophila melanogaster GN=CG3800 PE=1 SV=1	9.682	9.71	9.614	9.646	9.506	9.884	9.783	9.811	9.622	9.585	1.07549	0.105	0.287
1329	Regulatory particle triple-A ATPase 6-related OS=Drosophila melanogaster GN=Rpt6R PE=1 SV=1	7.752	7.678	7.754	7.857	7.45	7.791	7.392	7.442	7.717	7.331	0.892547	-0.164	0.274
1330	G protein alpha q subunit OS=Drosophila melanogaster GN=Galphaq PE=2 SV=2	9.989	9.931	9.79	9.741	9.981	9.654	9.582	9.798	9.722	9.728	0.877214	-0.189	0.055
1331	Peptidyl-prolyl cis-trans isomerase OS=Drosophila melanogaster GN=Dmel\CG7768 PE=2 SV=1	9.49	9.481	9.643	9.581	9.423	9.162	9.03	9.302	9.445	9.032	0.796088	-0.329	0.016
1332	Mitochondrial Rho GTPase OS=Drosophila melanogaster GN=Miro PE=3 SV=1	8.898	8.921	8.827	8.935	9.042	9.132	9.07	9.174	9.367	9.319	1.22095	0.288	0.01
1333	Apoptosis inhibitor 5 homolog OS=Drosophila melanogaster GN=Aac11 PE=2 SV=1	9.315	9.255	9.266	9.359	9.094	9.065	9.074	9.131	9.203	9.125	0.908148	-0.139	0.105
1334	Wnk kinase, isoform M OS=Drosophila melanogaster GN=Wnk PE=1 SV=2	9.13	9.306	9.377	9.187	9.32	9.266	9.263	9.335	9.06	9.201	0.973329	-0.039	0.705
1335	Alpha-tubulin N-acetyltransferase 1 OS=Drosophila melanogaster GN=CG3967 PE=2 SV=2	7.613	7.65	7.478	7.473	7.522	7.389	7.392	7.544	7.175	7.369	0.886382	-0.174	0.092
1336	V-type proton ATPase subunit D 1 OS=Drosophila melanogaster GN=Vha36-1 PE=2 SV=1	8.623	8.625	8.51	8.692	8.871	8.464	8.861	8.809	8.87	8.98	1.09657	0.133	0.344
1337	Uncharacterized protein, isoform E OS=Drosophila melanogaster GN=anon-EST:Posey232 PE=1 SV=1	10.074	9.989	9.987	10.102	10.507	9.533	9.91	9.99	10.19	10.22	0.892547	-0.164	0.411
1338	Enhancer of mRNA-decapping protein 4 homolog OS=Drosophila melanogaster GN=Ge-1 PE=1 SV=2	9.396	9.418	9.26	9.286	9.445	9.276	9.276	9.228	9.349	9.296	0.948684	-0.076	0.318
1339	GH01619p OS=Drosophila melanogaster GN=Rab2 PE=1 SV=1	9.209	9.115	8.928	9.111	9.493	9.079	9.208	9.27	9.511	9.62	1.12194	0.166	0.339
1340	Shaggy, isoform Q OS=Drosophila melanogaster GN=sgg PE=1 SV=1	5.102	5.424	5.541	5.281	5.447	3.137	3.004	3.311	3.568	3.397	0.237336	-2.075	0
1341	FI21480p1 OS=Drosophila melanogaster GN=mIF2 PE=1 SV=2	9.598	9.618	9.626	9.709	9.647	9.622	9.469	9.5	9.392	9.491	0.904379	-0.145	0.065
1342	Sterile20-like kinase, isoform G OS=Drosophila melanogaster GN=Slik PE=1 SV=1	3.217	3.542	3.298	3.186	3.077	2.62	3.267	3.279	3.157	3.181	0.893166	-0.163	0.378
1343	Sterile20-like kinase, isoform B OS=Drosophila melanogaster GN=Slik PE=1 SV=2	4.062	4.069	3.931	3.996	3.852	4.084	4.115	3.809	3.767	3.986	0.97942	-0.03	0.814
1344	Mitochondrial inner membrane protease ATP23 OS=Drosophila melanogaster GN=Dmel\CG5131 PE=1 SV=2	9.535	9.539	9.405	9.463	9.522	9.229	9.08	9.24	9.104	9.147	0.793884	-0.333	0.001
1345	CG9380, isoform D OS=Drosophila melanogaster GN=CG9380 PE=1 SV=2	8.772	8.692	8.709	8.663	8.739	8.959	9.152	9.06	8.861	9.069	1.23542	0.305	0.004
1346	Eukaryotic translation initiation factor eIF1 OS=Drosophila melanogaster GN=eIF1 PE=1 SV=1	8.635	8.477	8.631	8.499	9.03	8.778	8.783	8.915	9.44	9.432	1.3333	0.415	0.075
1347	CG8235 OS=Drosophila melanogaster GN=AIMP1 PE=1 SV=1	9.468	9.395	9.325	9.345	9.286	9.598	9.629	9.514	9.531	9.46	1.13524	0.183	0.029
1348	Prominin-like, isoform E OS=Drosophila melanogaster GN=prominin-like PE=1 SV=1	8.966	9.024	9.111	9.134	8.969	9.026	8.8	8.89	9.041	8.768	0.910039	-0.136	0.168
1349	Elongation factor G, mitochondrial OS=Drosophila melanogaster GN=ico PE=2 SV=2	9.066	9.104	9.155	9.14	9.257	9.118	8.92	9.09	9.226	9.26	0.984866	-0.022	0.847
1350	Huntingtin, isoform A OS=Drosophila melanogaster GN=htt PE=1 SV=1	7.489	7.484	7.469	7.43	7.255	7.861	7.704	7.62	7.503	7.512	1.1607	0.215	0.064
1351	Opsin Rh1 OS=Drosophila melanogaster GN=ninaE PE=1 SV=1	9.814	9.559	9.463	9.506	9.975	9.511	9.642	9.497	9.259	9.66	0.901875	-0.149	0.345
1352	Probable methylcrotonoyl-CoA carboxylase beta chain, mitochondrial OS=Drosophila melanogaster GN=l(2)04524 PE=2 SV=1	9.367	9.384	9.385	9.267	9.356	8.884	9.4	9.132	9.523	9.542	0.961927	-0.056	0.754
1353	Protein KBP homolog OS=Drosophila melanogaster GN=CG14043 PE=2 SV=1	9.17	9.252	9.403	9.334	9.087	9.277	9.134	9.136	9.119	8.885	0.908148	-0.139	0.235
1354	Uncharacterized protein, isoform F OS=Drosophila melanogaster GN=Vap-33B PE=1 SV=1	9.345	9.499	9.363	9.387	9.595	9.225	9.394	9.443	9.273	9.38	0.936272	-0.095	0.317
1355	CG1236 OS=Drosophila melanogaster GN=CG1236 PE=1 SV=2	9.834	9.713	9.614	9.87	10.049	9.061	9.082	8.884	9.301	9.247	0.615146	-0.701	0
1356	Protein anoxia up-regulated OS=Drosophila melanogaster GN=fau PE=2 SV=1	9.092	8.82	8.687	8.691	9.001	8.454	8.787	9.075	8.409	8.833	0.903127	-0.147	0.442
1357	CG6409, isoform A OS=Drosophila melanogaster GN=Dmel\CG6409 PE=1 SV=2	10.87	10.91	10.852	10.655	11.202	10.204	11.106	10.557	10.098	10.531	0.758384	-0.399	0.108
1358	FI21273p1 OS=Drosophila melanogaster GN=Klp59D PE=2 SV=2	7.523	7.719	7.978	7.922	7.594	7.782	7.295	7.584	7.78	7.568	0.904379	-0.145	0.372
1359	Inositol-1-monophosphatase OS=Drosophila melanogaster GN=142335_at PE=1 SV=1	9.433	9.43	9.361	9.393	9.633	9.464	9.714	9.566	9.557	9.556	1.08749	0.121	0.199
1360	AT13886p OS=Drosophila melanogaster GN=CG30376 PE=2 SV=1	8.577	8.588	8.638	8.64	8.494	8.554	7.806	8	8.147	7.816	0.695923	-0.523	0.01
1361	IP20609p (Fragment) OS=Drosophila melanogaster GN=lectin-30A PE=2 SV=1	9.353	9.239	8.667	8.901	9.787	7.881	8.674	8.848	8.449	8.997	0.651122	-0.619	0.073
1362	Drebrin-like protein OS=Drosophila melanogaster GN=Abp1 PE=1 SV=1	9.039	8.992	8.956	9.05	8.757	9.231	9.124	9.034	9.057	9.001	1.09505	0.131	0.188
1363	40S ribosomal protein S10b OS=Drosophila melanogaster GN=RpS10b PE=1 SV=2	10.234	10.029	10.082	10.431	10.603	9.499	9.963	9.838	10.581	10.416	0.860949	-0.216	0.439
1364	FI04467p OS=Drosophila melanogaster GN=Pdxk PE=1 SV=1	10.309	10.103	10.086	10.072	10.311	10.147	10.256	10.126	10.639	10.52	1.11884	0.162	0.287
1365	Cuticular protein 47Ef, isoform C OS=Drosophila melanogaster GN=Cpr47Ef PE=4 SV=2	5.313	5.512	5.797	5.672	5.816	4.626	4.596	5.238	4.767	4.944	0.579146	-0.788	0.001
1367	Ran-binding proteins 9/10 homolog OS=Drosophila melanogaster GN=RanBPM PE=1 SV=1	3.33	3.568	3.516	3.558	3.911	3.102	3.361	3.555	3.437	3.166	0.83915	-0.253	0.124
1368	GM02062p OS=Drosophila melanogaster GN=ND-23 PE=1 SV=1	10.542	10.379	10.35	10.546	10.983	8.432	8.562	8.782	8.901	8.838	0.27605	-1.857	0
1369	Nucleoporin 98-96kD, isoform A OS=Drosophila melanogaster GN=Nup98-96 PE=1 SV=3	8.757	8.624	8.664	8.533	8.544	8.785	8.822	8.804	8.636	8.821	1.1088	0.149	0.092
1370	LD41491p OS=Drosophila melanogaster GN=Pex3 PE=1 SV=1	9.727	9.598	9.424	9.455	9.606	9.499	9.429	9.452	9.64	9.586	0.971981	-0.041	0.702
1371	Anion exchange protein OS=Drosophila melanogaster GN=BcDNA:RE59468 PE=1 SV=2	9.146	9.186	9.017	9.045	9.233	9.064	9.136	9.199	9.056	9.222	1.00696	0.01	0.919
1372	MICOS complex subunit MIC13 homolog QIL1 OS=Drosophila melanogaster GN=QIL1 PE=2 SV=1	10.136	10.057	9.948	10.084	10.297	9.32	9.342	9.718	9.71	9.731	0.687771	-0.54	0.003
1373	LD43650p OS=Drosophila melanogaster GN=Mtch PE=1 SV=1	9.141	8.898	8.862	8.935	9.382	8.675	8.848	9.017	9.005	9.045	0.916369	-0.126	0.424
1374	Transcription factor BTF3 OS=Drosophila melanogaster GN=bic PE=1 SV=1	9.396	9.351	9.268	9.432	9.596	9.355	9.525	9.339	9.65	9.581	1.05775	0.081	0.484
1375	Pyrroline-5-carboxylate reductase OS=Drosophila melanogaster GN=P5cr-2 PE=1 SV=1	8.351	8.416	8.105	8.236	8.541	9.583	9.56	9.333	9.413	9.383	2.18102	1.125	0
1376	Brahma, isoform E OS=Drosophila melanogaster GN=brm PE=4 SV=1	7.789	7.821	7.786	7.657	7.826	7.79	7.828	7.796	7.86	7.774	1.02385	0.034	0.646
1377	Fatty acid bindin protein, isoform C OS=Drosophila melanogaster GN=fabp PE=1 SV=1	9.879	9.765	9.589	9.651	9.794	9.674	9.739	9.919	9.793	9.816	1.03742	0.053	0.606
1378	26-29kD-proteinase OS=Drosophila melanogaster GN=26-29-p PE=1 SV=1	9.437	9.284	9.783	9.575	9.176	10.164	9.77	9.788	10.413	9.795	1.44894	0.535	0.021
1380	LD21576p OS=Drosophila melanogaster GN=Nap1 PE=1 SV=1	10.281	10.201	10.157	10.138	10.318	10.292	10.275	10.269	10.289	10.251	1.03958	0.056	0.436
1381	Ankyrin 2, isoform X OS=Drosophila melanogaster GN=Ank2 PE=1 SV=1	6.801	6.925	6.633	6.591	6.914	6.126	6.479	6.493	5.843	6.428	0.707597	-0.499	0.015
1382	40S ribosomal protein S6 OS=Drosophila melanogaster GN=RpS6 PE=1 SV=1	8.8	8.702	8.833	8.946	8.733	8.961	8.931	8.794	8.93	8.659	1.0367	0.052	0.627
1383	Methylthioribose-1-phosphate isomerase OS=Drosophila melanogaster GN=CG11334 PE=2 SV=1	9.865	9.932	9.799	9.914	10.242	8.982	9.207	8.974	9.139	9.176	0.552865	-0.855	0
1384	AT06279p OS=Drosophila melanogaster GN=EndoA PE=1 SV=1	9.866	9.816	9.72	9.729	9.968	9.697	9.877	9.988	9.801	9.938	1.02811	0.04	0.71
1385	Eps15 homology domain containing protein-binding protein 1, isoform I OS=Drosophila melanogaster GN=Ehbp1 PE=1 SV=2	9.447	9.366	9.364	9.376	9.345	9.356	9.182	9.121	9.133	9.139	0.874785	-0.193	0.027
1386	CG8199 OS=Drosophila melanogaster GN=CG8199 PE=1 SV=1	8.73	8.775	8.792	8.818	8.717	8.893	9.209	9.001	8.941	9.022	1.18674	0.247	0.014
1387	AT27789p OS=Drosophila melanogaster GN=glo PE=1 SV=1	8.605	8.637	8.678	8.638	8.638	8.644	8.666	8.664	8.697	8.789	1.03742	0.053	0.433
1388	Protein unc-13 homolog 4B OS=Drosophila melanogaster GN=stac PE=1 SV=5	9.609	9.498	9.565	9.473	9.58	9.45	9.572	9.452	9.309	9.374	0.924663	-0.113	0.177
1389	Dolichyl-diphosphooligosaccharide--protein glycosyltransferase 48 kDa subunit OS=Drosophila melanogaster GN=Ost48 PE=2 SV=2	9.71	9.705	9.757	9.73	9.644	9.695	9.846	9.758	9.747	9.793	1.04174	0.059	0.393
1390	Uncharacterized protein, isoform C OS=Drosophila melanogaster GN=CG10407 PE=1 SV=1	10.17	10.136	9.955	10.025	10.515	9.246	9.235	9.323	9.718	9.561	0.597496	-0.743	0.001
1391	LD11955p OS=Drosophila melanogaster GN=mib2 PE=1 SV=1	8.218	8.246	8.279	8.409	8.276	8.423	8.198	8.208	8.385	8.177	0.99516	-0.007	0.948
1393	CG1824 OS=Drosophila melanogaster GN=CG1824 PE=1 SV=1	9.518	9.455	9.304	9.376	9.457	8.895	8.807	9.062	9.013	9.118	0.735603	-0.443	0.001
1394	Glucosamine-6-phosphate isomerase OS=Drosophila melanogaster GN=Oscillin PE=3 SV=1	10.138	10.192	10.267	10.318	10.097	10.42	10.409	10.191	10.448	9.978	1.06216	0.087	0.52
1395	Uncharacterized protein, isoform B OS=Drosophila melanogaster GN=CG15894 PE=1 SV=1	8.037	8.043	8.017	8.036	8.039	8.098	8.16	8.033	7.943	7.998	1.00835	0.012	0.888
1396	Smallminded, isoform A OS=Drosophila melanogaster GN=smid PE=1 SV=1	8.976	8.952	8.97	8.993	9.074	8.987	8.861	9.085	9.108	9.074	1.02101	0.03	0.735
1397	Arginine methyltransferase 1 OS=Drosophila melanogaster GN=Art1 PE=1 SV=1	9.021	9.003	9.161	9.047	8.835	9.019	8.925	8.877	9.092	8.951	0.971981	-0.041	0.69
1398	CG5214 OS=Drosophila melanogaster GN=CG5214 PE=1 SV=1	10.73	10.645	10.561	10.814	11.162	9.524	9.529	9.555	9.443	9.507	0.414372	-1.271	0
1399	Odorant-binding protein 56g OS=Drosophila melanogaster GN=Obp56g PE=4 SV=1	10.66	10.776	10.358	10.498	10.977	10.601	10.973	10.923	10.441	10.92	1.08523	0.118	0.548
1400	Homer, isoform E OS=Drosophila melanogaster GN=homer PE=1 SV=2	9.255	9.57	9.377	9.291	9.551	8.841	8.837	8.823	9.082	9.081	0.718968	-0.476	0.002
1401	Probable cytosolic iron-sulfur protein assembly protein Ciao1 OS=Drosophila melanogaster GN=Ciao1 PE=1 SV=1	9.198	9.131	9.13	9.289	9.172	8.525	8.543	8.291	8.648	8.566	0.628942	-0.669	0
1402	Ribosomal protein L11, isoform B OS=Drosophila melanogaster GN=RpL11 PE=1 SV=1	10.151	10.152	10.254	10.382	10.203	10.199	10.332	10.285	10.718	10.356	1.10957	0.15	0.259
1403	AT28366p OS=Drosophila melanogaster GN=Ppm1 PE=2 SV=1	8.694	8.725	9.024	8.99	8.553	8.855	8.606	8.922	8.909	8.599	0.986917	-0.019	0.913
1404	Gilgamesh, isoform J OS=Drosophila melanogaster GN=gish PE=1 SV=1	7.047	7.003	7.206	7.209	6.86	6.373	5.576	6.171	6.306	6.174	0.51943	-0.945	0.001
1405	Uncharacterized protein, isoform O OS=Drosophila melanogaster GN=CG43427 PE=1 SV=1	5.574	5.522	5.421	5.293	5.335	6.486	6.187	5.896	5.479	5.506	1.39668	0.482	0.063
1406	H/ACA ribonucleoprotein complex subunit 4 OS=Drosophila melanogaster GN=Nop60B PE=1 SV=1	9.364	9.279	9.475	9.631	9.515	9.574	9.316	9.529	9.833	9.469	1.06511	0.091	0.517
1407	RH60267p OS=Drosophila melanogaster GN=CG15096 PE=1 SV=1	5.977	6.235	6.338	6.423	5.971	6.52	7.172	6.84	6.301	6.727	1.43694	0.523	0.027
1408	GDP-mannose 4,6 dehydratase OS=Drosophila melanogaster GN=Gmd PE=1 SV=2	8.608	8.677	8.697	8.623	8.757	8.402	8.473	8.488	8.708	8.743	0.926588	-0.11	0.297
1409	GH10507p OS=Drosophila melanogaster GN=Acp PE=2 SV=2	4.466	4.856	4.431	4.843	5.388	4.384	5.004	5.416	5.201	5.689	1.26751	0.342	0.318
1410	Synaptosomal-associated protein OS=Drosophila melanogaster GN=Snap24 PE=1 SV=1	9.03	9.122	9.022	9.03	8.977	9.553	9.544	9.479	9.031	9.14	1.24229	0.313	0.044
1411	Uncharacterized protein, isoform E OS=Drosophila melanogaster GN=CG34355 PE=1 SV=1	8.671	8.469	8.733	8.811	8.688	8.231	8.069	8.228	8.4	8.315	0.744323	-0.426	0.002
1412	Maltase A6, isoform C OS=Drosophila melanogaster GN=Mal-A6 PE=1 SV=2	7.839	7.253	7.112	7.576	7.938	9.833	10.408	10.166	10.298	10.288	6.2941	2.654	0
1413	ADP/ATP translocase OS=Drosophila melanogaster GN=Ant2 PE=2 SV=1	9.771	9.643	9.388	9.406	10.004	8.484	8.07	8.512	8.931	8.558	0.456599	-1.131	0
1414	Argonaute-1, isoform A OS=Drosophila melanogaster GN=AGO1 PE=1 SV=1	9.367	9.361	9.362	9.43	9.475	9.256	9.336	9.177	9.398	9.244	0.922103	-0.117	0.138
1415	CG5397, isoform A OS=Drosophila melanogaster GN=CT16527 PE=1 SV=1	8.717	8.528	8.574	8.552	8.752	8.442	8.461	8.532	8.652	8.691	0.953299	-0.069	0.496
1416	Fasciclin 3, isoform C OS=Drosophila melanogaster GN=Fas3 PE=4 SV=2	5.003	5.157	5.484	5.392	5.086	5.229	5.527	4.7	3.865	4.618	0.739181	-0.436	0.235
1417	CG9886, isoform B OS=Drosophila melanogaster GN=Dmel\CG9886 PE=4 SV=1	10.171	10.088	10.025	10.302	10.812	9.785	10.466	10.141	10.157	10.416	0.941478	-0.087	0.727
1418	LD25351p OS=Drosophila melanogaster GN=Papss PE=1 SV=1	8.634	8.615	8.445	8.406	8.487	8.497	8.571	8.632	8.539	8.613	1.03742	0.053	0.541
1419	WD repeat-containing protein 26 homolog OS=Drosophila melanogaster GN=CG7611 PE=1 SV=1	9.998	9.794	9.75	9.886	10.037	9.579	9.492	9.784	10.351	10.072	0.97468	-0.037	0.879
1420	GH16214p OS=Drosophila melanogaster GN=Mbs PE=1 SV=1	8.573	8.462	8.454	8.41	8.359	8.547	8.51	8.578	8.485	8.49	1.04972	0.07	0.345
1421	Alpha-mannosidase OS=Drosophila melanogaster GN=LManI PE=3 SV=1	8.359	8.452	8.419	8.578	8.748	8.458	8.92	8.886	8.696	9.001	1.21504	0.281	0.078
1422	RE58433p OS=Drosophila melanogaster GN=CT31762 PE=1 SV=1	9.086	9.189	9.076	9.069	9.054	9.129	9.299	9.207	8.986	9.022	1.02314	0.033	0.743
1423	Complexin, isoform U OS=Drosophila melanogaster GN=cpx PE=1 SV=1	7.593	7.633	7.676	7.644	7.773	7.847	7.901	7.706	7.223	7.532	0.984866	-0.022	0.907
1424	CHOp24, isoform A OS=Drosophila melanogaster GN=CHOp24 PE=1 SV=1	9.142	9.225	9.192	9.123	8.818	9.314	9.395	9.241	9.275	9.197	1.13603	0.184	0.106
1425	NADH dehydrogenase (Ubiquinone) SGDH subunit, isoform A OS=Drosophila melanogaster GN=ND-SGDH PE=1 SV=1	10.008	9.961	9.896	9.995	10.196	8.991	8.818	9.009	9.247	9.068	0.505576	-0.984	0
1426	1-phosphatidylinositol 4,5-bisphosphate phosphodiesterase classes I and II OS=Drosophila melanogaster GN=Plc21C PE=2 SV=3	8.986	8.839	8.874	8.829	8.972	9.089	9.066	9.096	9.078	9.143	1.14393	0.194	0.015
1427	Uncharacterized protein, isoform G OS=Drosophila melanogaster GN=Dmel\CG43783 PE=1 SV=1	7.274	7.46	7.423	7.369	6.967	7.704	7.366	7.373	7.149	6.996	1.01326	0.019	0.932
1428	Conserved oligomeric Golgi complex subunit 5 OS=Drosophila melanogaster GN=fws PE=2 SV=1	8.818	8.815	8.637	8.675	8.66	8.634	8.731	8.539	8.721	8.549	0.942131	-0.086	0.335
1429	Adult cuticle protein 65Aa OS=Drosophila melanogaster GN=Acp65Aa PE=1 SV=2	10.18	10.092	9.927	10.262	10.083	10.219	10.396	10.327	10.076	10.594	1.1591	0.213	0.124
1430	Protein windbeutel OS=Drosophila melanogaster GN=wbl PE=1 SV=1	10.643	10.817	10.561	10.717	10.28	10.259	10.474	10.274	10.421	10.385	0.846159	-0.241	0.08
1431	Liprin-alpha, isoform E OS=Drosophila melanogaster GN=Liprin-alpha PE=1 SV=1	8.105	8.1	8.013	7.938	7.862	8.155	8.244	8.265	8.038	8.149	1.12272	0.167	0.083
1432	Fondue, isoform D OS=Drosophila melanogaster GN=fon PE=1 SV=1	4.663	3.123	5.163	3.72	4.136	5.51	5.019	4.842	5.649	5.019	2.06623	1.047	0.037
1433	Adenylate kinase 1, isoform B OS=Drosophila melanogaster GN=Adk1 PE=1 SV=1	10.477	10.408	10.415	10.45	10.524	10.26	10.192	10.322	10.213	10.407	0.885154	-0.176	0.035
1434	CG8399, isoform B OS=Drosophila melanogaster GN=CG8399 PE=4 SV=1	8.633	8.378	8.337	8.306	8.484	8.646	8.775	8.933	9.06	9.223	1.41421	0.5	0.006
1435	Ced-12 OS=Drosophila melanogaster GN=Ced-12 PE=1 SV=1	8.787	8.735	8.651	8.622	8.542	8.85	8.822	8.808	8.795	8.793	1.1065	0.146	0.07
1436	Serine/threonine-protein phosphatase PP2A OS=Drosophila melanogaster GN=mts PE=2 SV=1	9.091	9.203	9.14	9.199	9.039	9.023	9.108	9.118	9.01	9.075	0.954621	-0.067	0.358
1437	Cuticular protein 49Ae OS=Drosophila melanogaster GN=Cpr49Ae PE=1 SV=1	10.151	9.882	9.496	10.309	10.405	9.436	9.837	9.962	9.995	10.481	0.929161	-0.106	0.732
1438	Unc-104 ortholog, isoform G OS=Drosophila melanogaster GN=unc-104 PE=3 SV=1	8.876	9.025	8.939	8.952	8.912	8.746	8.684	8.674	8.64	8.641	0.832776	-0.264	0.002
1439	CG9471, isoform A OS=Drosophila melanogaster GN=CG9471-RA PE=1 SV=1	9.458	9.299	9.177	9.274	9.322	9.231	9.306	9.493	9.592	9.566	1.09581	0.132	0.262
1440	GH25853p OS=Drosophila melanogaster GN=Dmel\CG10132 PE=1 SV=2	9.721	9.677	9.689	9.619	9.695	9.469	9.315	9.411	9.444	9.454	0.833931	-0.262	0.002
1441	FI15274p1 OS=Drosophila melanogaster GN=CG8446-RE PE=1 SV=1	9.764	9.724	9.63	9.705	9.963	8.976	9.046	9.198	8.846	9.089	0.604578	-0.726	0
1442	Methionine aminopeptidase 2 OS=Drosophila melanogaster GN=und PE=1 SV=1	9.552	9.587	9.676	9.699	9.368	9.819	9.63	9.553	9.643	9.411	1.02456	0.035	0.793
1443	AT09608p OS=Drosophila melanogaster GN=CG30491;CG30495 PE=1 SV=1	8.836	8.874	8.78	8.974	8.888	8.698	8.644	8.539	8.39	8.299	0.780786	-0.357	0.007
1444	Ubiquitin carboxyl-terminal hydrolase OS=Drosophila melanogaster GN=Uch-L5 PE=1 SV=1	10.031	9.953	10.039	10.119	10.02	9.694	9.625	9.524	9.775	9.554	0.75891	-0.398	0.001
1445	Ecto-5'-nucleotidase 2, isoform A OS=Drosophila melanogaster GN=NT5E-2 PE=1 SV=1	8.4	8.792	8.622	8.566	8.511	9.306	9.421	9.429	9.34	9.411	1.74473	0.803	0
1446	Dihydroorotate dehydrogenase (quinone), mitochondrial OS=Drosophila melanogaster GN=Dhod PE=2 SV=2	9.825	9.792	9.782	9.804	10.066	9.095	9.244	9.203	9.182	9.349	0.642158	-0.639	0
1447	Cytochrome P450 4p1 OS=Drosophila melanogaster GN=Cyp4p1 PE=2 SV=1	8.943	8.808	8.794	8.71	8.629	9.142	8.877	8.919	8.534	8.886	1.06807	0.095	0.522
1448	NADH dehydrogenase [ubiquinone] 1 alpha subcomplex subunit 8 OS=Drosophila melanogaster GN=ND-19 PE=1 SV=1	10.044	9.754	9.72	9.957	10.426	8.047	8.367	8.631	8.883	8.926	0.376312	-1.41	0
1449	EG:BACN32G11.3 protein OS=Drosophila melanogaster GN=Lrpprc2 PE=1 SV=1	9.898	9.874	9.963	9.952	9.62	9.714	9.473	9.598	9.751	9.696	0.861546	-0.215	0.064
1450	Endophilin B, isoform A OS=Drosophila melanogaster GN=EndoB PE=1 SV=1	9.299	9.213	9.168	9.216	9.411	9.018	9.214	9.263	9.123	9.314	0.949342	-0.075	0.46
1451	Phospholipid-transporting ATPase OS=Drosophila melanogaster GN=CG42321 PE=3 SV=1	9.115	9.069	9.078	9.158	9.26	8.949	9.058	9.05	9.127	9.186	0.957935	-0.062	0.475
1452	CG5789, isoform A OS=Drosophila melanogaster GN=CG5789-RA PE=1 SV=2	8.714	8.833	8.715	8.79	8.666	8.694	8.469	8.455	8.467	8.552	0.860949	-0.216	0.023
1453	Numb-associated kinase, isoform A OS=Drosophila melanogaster GN=Nak PE=1 SV=2	8.698	8.701	8.836	8.77	8.779	8.684	8.806	8.787	8.595	8.649	0.964598	-0.052	0.528
1454	CG2930, isoform E OS=Drosophila melanogaster GN=CG2930 PE=1 SV=1	9.479	9.48	9.473	9.432	9.251	9.801	9.714	9.646	9.414	9.49	1.14076	0.19	0.106
1455	Carboxypeptidase OS=Drosophila melanogaster GN=CG4572-RC PE=1 SV=1	9.66	9.467	9.622	9.632	9.636	9.957	9.977	9.909	9.975	9.925	1.27015	0.345	0.001
1456	CG4825, isoform A OS=Drosophila melanogaster GN=Dmel\CG4825 PE=1 SV=1	9.704	9.783	9.596	9.642	9.57	9.673	9.652	9.529	9.477	9.409	0.925946	-0.111	0.246
1457	Profilin OS=Drosophila melanogaster GN=chic PE=2 SV=1	9.618	9.369	9.38	9.554	9.846	8.787	8.86	8.779	9.598	9.304	0.713013	-0.488	0.046
1458	Alphabet, isoform E OS=Drosophila melanogaster GN=alph PE=1 SV=1	9.754	9.712	9.678	9.687	9.753	9.586	9.631	9.609	9.645	9.715	0.946058	-0.08	0.225
1459	Nucleoporin 154kD, isoform A OS=Drosophila melanogaster GN=Nup154 PE=1 SV=1	8.95	9.051	8.783	8.866	8.908	8.891	8.943	9.097	9.051	9.237	1.09581	0.132	0.218
1460	CG5915 protein OS=Drosophila melanogaster GN=Rab7 PE=1 SV=1	9.876	9.526	9.562	9.588	9.968	9.513	9.632	9.593	9.854	9.814	0.984184	-0.023	0.89
1461	GEO07517p1 OS=Drosophila melanogaster GN=Obp56d PE=1 SV=1	10.289	10.156	10.091	9.997	10.778	9.722	10.532	10.696	9.734	10.604	0.99654	-0.005	0.99
1462	CG9149 OS=Drosophila melanogaster GN=Dmel\CG9149 PE=1 SV=2	9.653	9.707	9.675	9.779	9.878	9.72	9.774	9.825	9.917	9.855	1.05702	0.08	0.351
1463	Gp150, isoform D OS=Drosophila melanogaster GN=Gp150 PE=1 SV=1	9.111	8.655	8.684	8.569	8.833	8.788	8.875	8.878	9.005	9.08	1.11342	0.155	0.279
1464	Band 7 protein CG42540 OS=Drosophila melanogaster GN=CG42540 PE=2 SV=2	8.257	8.243	8.243	8.26	8.283	8.172	8.087	8.251	8.332	8.29	0.978742	-0.031	0.71
1465	Nuclear export mediator factor NEMF homolog OS=Drosophila melanogaster GN=Clbn PE=1 SV=2	8.413	8.575	8.649	8.544	8.311	8.926	8.901	8.711	8.675	8.615	1.2033	0.267	0.036
1466	RE64336p OS=Drosophila melanogaster GN=CG34133 PE=1 SV=3	7.629	7.652	7.684	7.56	7.721	7.593	7.691	7.664	7.616	7.692	1.00139	0.002	0.983
1467	Uncharacterized protein OS=Drosophila melanogaster GN=CG31288 PE=1 SV=1	10.037	10.164	9.98	10.167	10.13	9.853	10.311	10.193	10.215	10.257	1.04972	0.07	0.576
1468	Eukaryotic translation initiation factor 4E-binding protein Mextli OS=Drosophila melanogaster GN=mxt PE=1 SV=1	9.943	9.931	9.952	9.983	9.831	9.916	9.961	9.966	10.062	9.947	1.02954	0.042	0.563
1469	Nascent polypeptide associated complex protein alpha subunit, isoform D OS=Drosophila melanogaster GN=Nacalpha PE=4 SV=1	9.389	9.391	9.492	9.578	9.338	9.617	9.669	9.355	9.506	9.436	1.05629	0.079	0.452
1470	L.2.35Df OS=Drosophila melanogaster GN=Mtr4 PE=1 SV=1	8.099	8.059	7.963	8.045	7.995	8.403	8.351	8.179	8.26	8.138	1.17609	0.234	0.017
1471	Cuticular protein 51A OS=Drosophila melanogaster GN=Cpr51A PE=1 SV=1	8.866	8.67	9.093	9.106	8.768	9.421	8.952	9.197	9.247	9.153	1.22519	0.293	0.06
1473	CG9684 OS=Drosophila melanogaster GN=CG9684 PE=1 SV=2	8.446	8.588	8.695	8.662	8.264	8.6	8.511	8.539	8.453	8.33	0.969962	-0.044	0.742
1474	SD04280p OS=Drosophila melanogaster GN=Usp2 PE=2 SV=2	5.767	5.892	6.03	6.006	6.012	5.795	5.409	5.906	5.306	5.704	0.802737	-0.317	0.058
1475	Putative hydroxypyruvate isomerase OS=Drosophila melanogaster GN=Gip PE=2 SV=1	9.777	9.885	9.897	10.107	10.084	9.702	10.127	9.838	9.978	9.985	0.983502	-0.024	0.872
1476	RE03883p OS=Drosophila melanogaster GN=CG13321 PE=1 SV=1	9.876	9.603	10.058	9.734	9.902	9.832	10.329	10.073	10.267	10.396	1.26927	0.344	0.047
1477	CASK ortholog, isoform H OS=Drosophila melanogaster GN=CASK PE=1 SV=1	8.876	9.031	8.878	8.742	8.926	9.213	9.199	9.201	9.039	9.086	1.19499	0.257	0.012
1478	Eukaryotic initiation factor 4A-III OS=Drosophila melanogaster GN=eIF4AIII PE=1 SV=1	8.972	9.034	8.903	8.905	8.816	9.208	9.181	9.085	9.169	9.124	1.1704	0.227	0.01
1479	LD23155p OS=Drosophila melanogaster GN=Rbpn-5 PE=1 SV=2	7.895	7.875	7.899	7.863	7.84	8.15	8.099	8.142	7.875	7.876	1.11265	0.154	0.113
1480	Eukaryotic translation initiation factor 5 OS=Drosophila melanogaster GN=eIF5 PE=1 SV=1	9.35	9.185	9.302	9.27	9.182	9.27	9.256	9.177	9.423	9.315	1.02172	0.031	0.738
1481	RE12073p OS=Drosophila melanogaster GN=CG12360 PE=1 SV=1	8.95	8.912	8.994	9.057	8.97	9.071	9.059	8.851	9.084	8.922	1.01466	0.021	0.828
1482	Obg-like ATPase 1 OS=Drosophila melanogaster GN=CG1354 PE=1 SV=1	10.395	10.43	10.447	10.44	10.267	10.282	10.205	10.234	10.222	10.205	0.89131	-0.166	0.031
1483	FI18122p1 OS=Drosophila melanogaster GN=Snx1 PE=1 SV=1	9.518	9.498	9.511	9.396	9.534	9.521	9.737	9.693	9.584	9.676	1.11034	0.151	0.067
1484	Tomosyn ortholog, isoform C OS=Drosophila melanogaster GN=Tomosyn PE=1 SV=3	9.172	9.011	9.047	8.886	9.053	9.041	9.071	8.959	9.003	9.05	0.993781	-0.009	0.925
1485	Eater OS=Drosophila melanogaster GN=eater PE=1 SV=5	7.642	7.497	7.933	7.65	7.663	9.05	9.187	8.929	8.878	8.926	2.49147	1.317	0
1486	RE73736p OS=Drosophila melanogaster GN=spoon PE=1 SV=1	8.548	8.525	8.68	8.73	8.445	8.855	8.554	8.602	8.673	8.581	1.04826	0.068	0.538
1487	Leukotriene A(4) hydrolase OS=Drosophila melanogaster GN=mRpL13 PE=1 SV=4	9.69	9.572	9.595	9.689	9.683	9.505	9.551	9.54	9.772	9.692	0.976709	-0.034	0.725
1488	Tenectin isoform 1 OS=Drosophila melanogaster GN=tnc PE=2 SV=1	9.055	8.961	8.974	9.142	9.255	8.668	8.944	8.832	8.616	8.869	0.816769	-0.292	0.021
1489	CG9314 protein OS=Drosophila melanogaster GN=CatB PE=2 SV=1	8.624	8.771	9.111	9.034	8.746	9.124	8.624	8.665	8.972	8.467	0.941478	-0.087	0.668
1490	Painting of fourth, isoform C OS=Drosophila melanogaster GN=Pof PE=4 SV=1	9.24	9.308	9.596	9.591	9.396	9.362	9.284	9.307	9.438	9.151	0.921464	-0.118	0.321
1491	CG4587, isoform H OS=Drosophila melanogaster GN=BG:DS07108.2 PE=1 SV=1	8.575	8.489	8.384	8.548	8.445	8.681	8.493	8.407	8.479	8.549	1.02385	0.034	0.727
1492	CG8888 OS=Drosophila melanogaster GN=CG8888 PE=1 SV=1	10.004	9.911	9.79	9.934	10.257	10.069	10.16	10.094	10.467	10.399	1.19582	0.258	0.087
1493	Asparaginyl-tRNA synthetase, isoform A OS=Drosophila melanogaster GN=AsnRS PE=1 SV=1	9.121	9.18	9.113	9.18	9.001	9.356	9.42	9.405	9.399	9.293	1.19334	0.255	0.004
1494	Maltase A2 OS=Drosophila melanogaster GN=Mal-A2 PE=2 SV=2	8.746	8.878	8.887	9.05	9.188	8.981	9.592	9.098	9.162	9.193	1.19416	0.256	0.126
1495	CG5567 OS=Drosophila melanogaster GN=Phos5567 PE=1 SV=1	8.639	8.597	8.496	8.735	9.07	8.358	8.501	8.55	8.967	9.101	0.991717	-0.012	0.966
1496	CG4658, isoform A OS=Drosophila melanogaster GN=Dmel\CG4658 PE=1 SV=1	9.382	9.349	9.238	9.299	9.441	9.228	9.408	9.42	9.48	9.556	1.05409	0.076	0.435
1497	CG4266, isoform A OS=Drosophila melanogaster GN=CG4266 PE=1 SV=2	8.031	7.876	8.118	7.927	7.94	8.106	8.51	8.333	7.98	8.207	1.18838	0.249	0.073
1498	Uncharacterized protein, isoform B OS=Drosophila melanogaster GN=CG10550 PE=1 SV=1	9.571	9.69	9.564	9.559	9.589	9.371	9.498	9.512	9.478	9.508	0.91955	-0.121	0.096
1499	CDK5RAP3-like protein OS=Drosophila melanogaster GN=CG30291 PE=2 SV=1	9.867	9.878	9.843	9.877	9.685	9.982	9.98	9.866	9.968	9.908	1.07998	0.111	0.155
1500	Neprilysin 2, isoform B OS=Drosophila melanogaster GN=Nep2 PE=1 SV=1	8.864	9.005	8.782	8.817	9.003	9.09	9.108	9.209	9.144	9.21	1.19582	0.258	0.009
1501	Glutathione S transferase E6 OS=Drosophila melanogaster GN=GstE6 PE=1 SV=1	9.214	9.212	9.119	9.223	9.397	9.292	9.765	9.601	9.813	9.864	1.35097	0.434	0.01
1502	GH08630p OS=Drosophila melanogaster GN=Ktl PE=1 SV=1	9.054	8.907	8.775	8.831	8.972	8.958	8.86	8.906	9.097	9.082	1.0519	0.073	0.476
1503	GH09802p OS=Drosophila melanogaster GN=MESK2 PE=1 SV=1	5.708	5.942	6.343	6.457	5.727	5.966	6.135	6.028	6.199	5.809	0.99447	-0.008	0.979
1504	Acinus, isoform A OS=Drosophila melanogaster GN=Acn PE=1 SV=1	8.175	8.112	8.091	8.008	7.911	8.517	8.448	8.181	8.046	8.084	1.14552	0.196	0.164
1505	BcDNA.LD34475 OS=Drosophila melanogaster GN=BcDNA.LD34475 PE=1 SV=1	8.557	8.441	8.41	8.559	8.482	8.458	8.041	8.05	8.493	8.233	0.849685	-0.235	0.089
1506	LD24793p OS=Drosophila melanogaster GN=Ref1 PE=1 SV=1	9.377	9.313	9.343	9.225	9.098	9.505	9.298	9.364	9.202	9.154	1.02314	0.033	0.785
1507	Paramyosin, isoform E OS=Drosophila melanogaster GN=Prm PE=1 SV=1	6.043	6.241	5.878	6.193	6.344	4.626	3.741	4.73	4.667	4.756	0.321747	-1.636	0
1508	Wings up A, isoform J OS=Drosophila melanogaster GN=wupA PE=1 SV=1	7.216	8.502	8.573	8.539	8.852	7.42	7.779	8.767	8.045	8.259	0.82188	-0.283	0.535
1509	LD30995p OS=Drosophila melanogaster GN=CG10098 PE=1 SV=1	9.06	8.955	8.815	8.922	9.177	8.9	8.854	8.934	9.21	9.199	1.02385	0.034	0.818
1510	UPF0389 protein CG9231 OS=Drosophila melanogaster GN=CG9231 PE=1 SV=1	9.663	9.535	9.44	9.518	9.792	9.093	9.202	9.312	9.373	9.56	0.82245	-0.282	0.046
1511	CG2269, isoform B OS=Drosophila melanogaster GN=CG2269 PE=1 SV=1	5.904	5.577	5.242	5.708	6.504	3.205	4.688	4.326	4.9	5.023	0.390123	-1.358	0.011
1512	LD34461p OS=Drosophila melanogaster GN=Tom20 PE=1 SV=1	8.04	8.052	8.059	8.16	8	8.258	8.115	8.245	8.072	8.153	1.07624	0.106	0.177
1513	Mesencephalic astrocyte-derived neurotrophic factor homolog OS=Drosophila melanogaster GN=Manf PE=2 SV=2	9.99	10.067	10.094	10.063	9.741	10.062	10.178	10.109	9.857	9.897	1.02101	0.03	0.828
1514	GH11066p OS=Drosophila melanogaster GN=CG10560 PE=2 SV=2	8.391	8.32	8.314	8.594	8.361	7.963	8.163	8.176	8.67	8.428	0.922742	-0.116	0.503
1515	Neurexin 1, isoform F OS=Drosophila melanogaster GN=Nrx-1 PE=4 SV=1	7.752	7.921	7.874	7.811	7.929	8.027	7.937	7.89	7.553	7.853	0.99654	-0.005	0.973
1516	Syntaxin 1A, isoform B OS=Drosophila melanogaster GN=Syx1A PE=3 SV=1	9.503	9.476	9.425	9.543	9.671	9.404	9.554	9.502	9.534	9.491	0.981459	-0.027	0.764
1517	Actin-related protein 3 OS=Drosophila melanogaster GN=Arp3 PE=2 SV=3	9.451	9.311	9.376	9.338	9.401	9.403	9.463	9.4	9.42	9.434	1.03383	0.048	0.468
1518	Uncharacterized protein, isoform A OS=Drosophila melanogaster GN=Dmel\CG10226 PE=4 SV=1	8.682	8.653	8.569	8.748	8.913	8.468	8.589	8.588	8.446	8.611	0.886996	-0.173	0.088
1519	Probable prefoldin subunit 5 OS=Drosophila melanogaster GN=Pfdn5 PE=2 SV=1	8.508	8.438	8.712	8.581	8.221	8.636	8.509	8.391	8.579	8.334	0.997923	-0.003	0.988
1520	RH54244p OS=Drosophila melanogaster GN=yellow-c PE=1 SV=3	9.36	9.124	9.416	9.352	9.183	9.075	9.146	8.983	9.526	9.286	0.943438	-0.084	0.576
1521	CG5854 OS=Drosophila melanogaster GN=CG5854 PE=1 SV=1	8.398	8.253	8.264	8.235	8.474	8.638	8.633	8.593	9.052	8.876	1.35004	0.433	0.006
1522	Calcium/calmodulin dependent protein kinase I OS=Drosophila melanogaster GN=CaMKI PE=1 SV=1	8.291	8.245	8.364	8.265	8.46	8.341	8.503	8.335	8.553	8.415	1.07475	0.104	0.251
1523	Succinate--CoA ligase [ADP/GDP-forming] subunit alpha, mitochondrial OS=Drosophila melanogaster GN=CG6255 PE=2 SV=1	7.929	7.931	7.923	7.858	7.917	7.218	6.87	7.404	7.459	7.218	0.625031	-0.678	0
1524	CG8187 OS=Drosophila melanogaster GN=CG8187 PE=1 SV=1	9.636	9.592	9.49	9.462	9.634	9.216	9.087	9.22	9.04	9.133	0.745872	-0.423	0
1525	Accessory gland protein Acp62F OS=Drosophila melanogaster GN=Acp62F PE=2 SV=1	10.563	10.627	10.369	10.558	11.191	9.927	10.649	10.728	10.284	10.865	0.888227	-0.171	0.539
1526	1,2-dihydroxy-3-keto-5-methylthiopentene dioxygenase OS=Drosophila melanogaster GN=Adi1 PE=2 SV=2	9.606	9.549	9.599	9.772	10.203	9.294	9.768	9.512	9.399	9.57	0.848508	-0.237	0.197
1527	NADH dehydrogenase (Ubiquinone) 18 kDa subunit OS=Drosophila melanogaster GN=ND-18 PE=1 SV=2	10.131	9.606	9.324	10.11	11.635	7.442	7.909	8.286	8.673	8.714	0.257742	-1.956	0.004
1528	Limpet, isoform A OS=Drosophila melanogaster GN=Lmpt PE=1 SV=1	4.652	4.917	4.888	4.865	4.547	3.657	3.73	4.016	4.226	5.051	0.642603	-0.638	0.056
1529	Cuticular protein 65Au, isoform A OS=Drosophila melanogaster GN=Cpr65Au PE=1 SV=2	8.827	9.184	8.701	9.117	9.826	8.207	9.221	9.322	8.696	9.315	0.883315	-0.179	0.633
1530	Regulatory particle non-ATPase 8, isoform B OS=Drosophila melanogaster GN=Rpn8 PE=4 SV=1	9.365	9.381	9.149	9.352	9.412	9.116	9.238	9.329	9.555	9.418	0.999307	-0.001	0.995
1531	Spinophilin, isoform J OS=Drosophila melanogaster GN=Spn PE=1 SV=1	7.375	7.481	7.391	7.556	7.499	7.421	7.481	7.33	7.302	7.357	0.944747	-0.082	0.308
1532	Chondrocyte-derived ezrin-like domain containing protein ortholog, isoform E OS=Drosophila melanogaster GN=Cdep PE=1 SV=1	7.27	7.314	7.289	7.372	7.455	7.14	7.289	7.128	7.212	7.355	0.923382	-0.115	0.188
1533	Cuticular protein 66D OS=Drosophila melanogaster GN=Cpr66D PE=1 SV=2	6.786	6.872	6.926	6.951	6.967	9.063	8.691	8.961	9.421	9.067	4.40762	2.14	0
1534	Branched-chain-amino-acid aminotransferase OS=Drosophila melanogaster GN=CG1673 PE=1 SV=2	9.733	9.812	9.733	9.599	9.433	9.14	9.542	9.573	9.332	9.63	0.859161	-0.219	0.141
1535	Shaggy, isoform J OS=Drosophila melanogaster GN=sgg PE=1 SV=1	6.806	6.811	6.727	7.006	6.943	6.485	6.696	6.545	6.509	6.618	0.819037	-0.288	0.009
1536	Lethal (1) G0196, isoform P OS=Drosophila melanogaster GN=l(1)G0196 PE=1 SV=1	9.14	9.258	9.068	9.16	9.194	9.067	9.051	9.05	9.13	9.131	0.94737	-0.078	0.275
1537	O-acyltransferase OS=Drosophila melanogaster GN=mdy PE=2 SV=1	8.362	8.584	8.448	8.305	8.55	9.34	9.332	9.151	9.101	9.178	1.70645	0.771	0
1538	MIP08680p OS=Drosophila melanogaster GN=vib PE=1 SV=1	9.09	9.09	8.856	8.846	9.21	9.78	9.95	9.94	10.069	10.053	1.91853	0.94	0
1539	Malate dehydrogenase OS=Drosophila melanogaster GN=Dmel\CG10748 PE=3 SV=1	9.365	9.174	9.513	9.623	9.429	8.591	8.367	8.858	9.414	8.859	0.658383	-0.603	0.021
1540	Uncharacterized protein, isoform A OS=Drosophila melanogaster GN=CG11889 PE=4 SV=2	9.394	9.455	9.433	9.529	9.549	9.483	9.751	9.605	9.702	9.742	1.13603	0.184	0.052
1541	MIP15344p OS=Drosophila melanogaster GN=RpL28 PE=1 SV=1	10.355	10.359	10.364	10.55	10.406	9.884	10.16	9.732	10.226	9.964	0.75106	-0.413	0.007
1542	CG8503 OS=Drosophila melanogaster GN=SmydA-1 PE=2 SV=1	9.185	9.074	9.252	9.198	8.705	9.135	8.769	8.691	9.14	8.796	0.885154	-0.176	0.316
1543	RH38069p1 OS=Drosophila melanogaster GN=stnA PE=1 SV=1	9.418	9.383	9.28	9.35	9.392	9.276	9.427	9.462	9.328	9.308	0.997231	-0.004	0.964
1544	FI04459p OS=Drosophila melanogaster GN=Sf3b3 PE=1 SV=2	8.969	9.028	9.102	8.981	8.913	9.184	9.039	9.019	9.154	8.979	1.05409	0.076	0.363
1545	40S ribosomal protein S12 OS=Drosophila melanogaster GN=RpS12 PE=1 SV=2	10.078	9.991	10.06	10.415	10.531	9.458	9.794	9.633	10.232	10.047	0.767373	-0.382	0.089
1546	Blistery, isoform A OS=Drosophila melanogaster GN=by PE=2 SV=1	8.79	8.808	8.693	8.619	8.826	8.747	8.878	9.117	8.822	9.168	1.1479	0.199	0.114
1547	Dis3, isoform A OS=Drosophila melanogaster GN=Dis3 PE=1 SV=1	8.598	8.523	8.527	8.593	8.533	8.791	8.663	8.701	8.735	8.682	1.11651	0.159	0.027
1548	GS1-like, isoform B OS=Drosophila melanogaster GN=Gs1l PE=1 SV=1	5.582	5.247	5.547	5.41	5.609	5.533	5.514	5.405	5.595	5.699	1.04972	0.07	0.554
1549	LD24639p OS=Drosophila melanogaster GN=mmy PE=1 SV=1	8.824	8.788	8.843	8.766	8.687	9.307	9.181	9.166	9.236	9.06	1.32685	0.408	0
1550	Shaggy, isoform M OS=Drosophila melanogaster GN=sgg PE=1 SV=1	4.792	5.028	5.461	5.305	4.423	4.254	3.151	3.145	3.509	3.482	0.355027	-1.494	0.001
1551	Enhancer of bithorax, isoform H OS=Drosophila melanogaster GN=E(bx) PE=1 SV=1	8.263	8.283	8.284	8.282	8.244	8.535	8.374	8.31	8.319	8.271	1.06511	0.091	0.26
1552	FI01544p OS=Drosophila melanogaster GN=Rab1 PE=1 SV=1	8.841	8.662	8.57	8.581	8.842	8.56	8.613	8.522	8.869	8.72	0.971307	-0.042	0.743
1553	Transporter OS=Drosophila melanogaster GN=CG5549 PE=3 SV=2	8.115	8.172	8.116	8.188	8.173	8.308	8.204	8.111	7.923	8.057	0.978063	-0.032	0.765
1554	Exocyst complex component 2 OS=Drosophila melanogaster GN=Sec5 PE=2 SV=1	7.941	8.027	7.985	7.986	7.935	8.14	8.104	8.044	7.849	7.898	1.02243	0.032	0.744
1555	SAM50-like protein CG7639 OS=Drosophila melanogaster GN=CG7639 PE=2 SV=2	9.449	9.345	9.242	9.277	9.505	9.379	9.259	9.519	9.559	9.599	1.07177	0.1	0.378
1556	Phagocyte signaling-impaired protein OS=Drosophila melanogaster GN=psidin PE=2 SV=1	8.483	8.443	8.42	8.565	8.484	8.613	8.439	8.426	8.762	8.604	1.06437	0.09	0.365
1557	Atilla, isoform B OS=Drosophila melanogaster GN=atilla PE=4 SV=3	10.033	10.036	9.97	9.988	9.974	9.527	9.662	9.655	9.483	9.534	0.743291	-0.428	0
1558	GEO08953p1 OS=Drosophila melanogaster GN=38D.23 PE=2 SV=1	9.964	10.26	10.027	9.965	10.452	9.152	9.655	9.846	9.359	9.789	0.672217	-0.573	0.013
1559	LD40489p OS=Drosophila melanogaster GN=SF2 PE=1 SV=1	9.299	9.378	9.283	9.247	9.084	9.646	9.65	9.681	9.781	9.631	1.337	0.419	0.001
1560	GEO09476p1 OS=Drosophila melanogaster GN=glob1 PE=1 SV=1	9.045	9.139	9.076	9.149	9.464	9.833	10.299	10.044	10.008	10.199	1.86865	0.902	0
1561	Proteasome subunit alpha type-2 OS=Drosophila melanogaster GN=Prosalpha2 PE=1 SV=1	7.807	8.081	7.778	8.118	8.185	7.498	7.99	7.838	8.174	8.003	0.937571	-0.093	0.619
1562	Eukaryotic translation initiation factor 3 subunit H OS=Drosophila melanogaster GN=eIF-3p40 PE=1 SV=2	9.874	9.811	9.829	9.827	9.79	9.711	9.734	9.512	9.724	9.743	0.90689	-0.141	0.083
1563	RE14947p OS=Drosophila melanogaster GN=BG:DS07473.1 PE=2 SV=2	8.502	8.532	8.355	8.43	8.599	8.136	8.09	8.26	8.199	8.225	0.811127	-0.302	0.004
1564	Protein lethal(2)essential for life OS=Drosophila melanogaster GN=l(2)efl PE=1 SV=1	9.793	9.374	9.447	9.344	9.736	9.245	9.665	9.561	9.685	9.725	1.02598	0.037	0.838
1565	CG6841, isoform A OS=Drosophila melanogaster GN=BcDNA:LD43276 PE=1 SV=2	8.353	8.403	8.54	8.467	8.341	8.636	8.614	8.413	8.586	8.617	1.11188	0.153	0.089
1566	Mitochondrial transcription factor A, isoform B OS=Drosophila melanogaster GN=TFAM PE=1 SV=1	9.158	9.252	9.097	9.092	9.252	8.936	8.905	8.855	8.932	8.904	0.832776	-0.264	0.003
1567	IP02289p OS=Drosophila melanogaster GN=Obp56f PE=2 SV=1	9.105	9.301	9.035	9.11	9.804	8.612	9.241	9.238	8.344	9.07	0.773782	-0.37	0.19
1568	Congested-like trachea protein OS=Drosophila melanogaster GN=colt PE=2 SV=1	9.049	9.056	8.928	8.897	8.999	8.884	8.904	8.893	8.725	8.906	0.918276	-0.123	0.128
1569	GEO07866p1 OS=Drosophila melanogaster GN=RpS15Aa PE=1 SV=1	9.491	9.473	9.643	9.651	9.413	9.932	9.873	9.793	9.932	9.789	1.25614	0.329	0.003
1570	Adaptor protein complex 2, mu subunit, isoform A OS=Drosophila melanogaster GN=AP-2mu PE=1 SV=1	9.678	9.514	9.558	9.507	9.638	9.48	9.461	9.565	9.651	9.681	0.992404	-0.011	0.913
1571	Transient receptor potential cation channel protein painless OS=Drosophila melanogaster GN=pain PE=1 SV=1	9.555	9.455	9.308	9.306	9.496	9.598	9.682	9.648	9.657	9.707	1.17609	0.234	0.015
1572	LD23868p OS=Drosophila melanogaster GN=CG16721 PE=1 SV=1	9.359	9.368	9.333	9.298	9.451	9.238	9.089	9.112	9.26	9.078	0.866938	-0.206	0.019
1573	Oxygen-dependent coproporphyrinogen-III oxidase OS=Drosophila melanogaster GN=Coprox PE=2 SV=1	9.77	9.751	9.628	9.777	9.938	9.611	9.565	9.481	9.551	9.557	0.858565	-0.22	0.021
1574	GH10642p OS=Drosophila melanogaster GN=hebe PE=1 SV=1	9.025	9.002	9.082	8.963	9.014	8.986	9.263	9.151	8.829	9.168	1.04391	0.062	0.589
1575	LD47736p OS=Drosophila melanogaster GN=Sodh-2 PE=1 SV=1	7.146	7.228	7.109	7.234	7.488	6.797	7.264	7.033	6.942	7.005	0.850864	-0.233	0.089
1576	LD13353p OS=Drosophila melanogaster GN=Sherpa PE=1 SV=1	8.58	8.664	8.714	8.601	8.531	8.657	8.658	8.553	8.426	8.462	0.954621	-0.067	0.465
1577	Cytochrome b-c1 complex subunit 7 OS=Drosophila melanogaster GN=UQCR-14 PE=1 SV=1	9.905	9.916	9.999	9.833	10.16	8.242	8.738	8.828	8.788	8.678	0.40388	-1.308	0
1578	Dynactin 4, p62 subunit OS=Drosophila melanogaster GN=DCTN4-p62 PE=1 SV=1	7.971	8.013	7.927	7.951	7.973	7.774	7.983	7.852	7.868	7.911	0.940174	-0.089	0.218
1579	Uncharacterized protein, isoform K OS=Drosophila melanogaster GN=anon-WO0140519.28 PE=1 SV=1	7.11	7.027	7.018	7.051	6.863	7.17	7.106	7.153	6.927	7.173	1.06585	0.092	0.326
1580	Sec24AB ortholog, isoform A OS=Drosophila melanogaster GN=Sec24AB PE=1 SV=1	8.669	8.666	8.704	8.654	8.756	8.747	8.722	8.79	8.955	8.94	1.10267	0.141	0.102
1581	60S ribosomal protein L8 OS=Drosophila melanogaster GN=RpL8 PE=1 SV=1	9.665	9.407	9.359	9.748	10.188	9.377	9.735	9.63	10.213	10.223	1.11884	0.162	0.568
1582	Bifunctional phosphopantetheine adenylyltransferase-Dephospho-CoA kinase OS=Drosophila melanogaster GN=Ppat-Dpck PE=1 SV=2	9.506	9.451	9.24	9.368	9.617	9.187	9.398	9.501	9.635	9.628	1.02314	0.033	0.83
1583	Uncharacterized protein, isoform A OS=Drosophila melanogaster GN=CG17271 PE=1 SV=2	7.089	7.063	7.244	7.219	6.745	7.948	7.989	7.803	7.728	7.632	1.67946	0.748	0
1584	Arouser, isoform A OS=Drosophila melanogaster GN=aru PE=1 SV=1	8.36	8.533	8.496	8.484	8.37	8.502	8.498	8.494	8.485	8.513	1.03526	0.05	0.491
1585	Uncharacterized protein OS=Drosophila melanogaster GN=CG34034 PE=4 SV=1	9.286	9.353	9.269	9.47	10.022	9.53	10.352	10.334	9.605	10.374	1.47325	0.559	0.065
1586	Signal peptidase complex subunit 2 OS=Drosophila melanogaster GN=Spase25 PE=2 SV=1	9.324	9.402	9.276	9.33	9.316	9.121	9.321	9.248	9.256	9.345	0.951978	-0.071	0.36
1587	UMP-CMP kinase OS=Drosophila melanogaster GN=Dak1 PE=1 SV=1	9.197	9.16	9.178	9.112	9.355	9.169	9.337	9.357	9.191	9.374	1.06069	0.085	0.357
1588	Z band alternatively spliced PDZ-motif protein 66, isoform G OS=Drosophila melanogaster GN=Zasp66 PE=1 SV=1	4.826	4.932	4.39	4.678	5.098	5.736	5.992	6.149	5.491	6.228	2.19466	1.134	0
1589	RH51633p OS=Drosophila melanogaster GN=Dmel\CG33129 PE=1 SV=1	8.342	8.301	8.467	8.383	8.105	7.739	8.144	7.453	7.55	7.466	0.637722	-0.649	0.003
1590	Regulator of chromosome condensation OS=Drosophila melanogaster GN=Rcc1 PE=1 SV=2	9.215	9.082	9.229	9.252	9.288	8.643	8.831	9.063	8.831	8.979	0.787854	-0.344	0.008
1591	Major heat shock 70 kDa protein Aa OS=Drosophila melanogaster GN=Hsp70Aa PE=2 SV=2	4.942	5.101	5.279	5.289	4.789	6.841	7.031	5.691	7.049	6.229	2.805	1.488	0.001
1592	Misexpression suppressor of KSR 2, isoform J OS=Drosophila melanogaster GN=MESK2 PE=1 SV=1	4.878	4.907	5.175	5.049	4.872	4.966	4.462	4.614	5.182	5.015	0.915099	-0.128	0.496
1593	Adenylyl cyclase 76E, isoform B OS=Drosophila melanogaster GN=Ac76E PE=3 SV=1	8.261	8.348	8.29	8.32	8.241	8.526	8.389	8.294	8.172	8.225	1.0203	0.029	0.785
1594	CG3529, isoform B OS=Drosophila melanogaster GN=DmTOM1 PE=1 SV=2	6.636	6.58	6.438	6.555	6.45	6.716	6.891	6.517	6.471	6.584	1.07475	0.104	0.378
1595	GTP-binding nuclear protein Ran OS=Drosophila melanogaster GN=Ran PE=1 SV=1	10.284	10.154	10.209	10.233	10.451	10.009	10.075	10.135	10.418	10.385	0.957935	-0.062	0.651
1596	Proteasome subunit beta type OS=Drosophila melanogaster GN=Prosbeta1 PE=1 SV=1	8.522	8.529	8.216	8.502	8.586	8.313	8.605	8.629	8.821	8.905	1.13603	0.184	0.244
1597	Protein unzipped OS=Drosophila melanogaster GN=uzip PE=1 SV=2	8.783	8.745	8.609	8.837	8.999	8.685	8.738	8.829	8.988	9.133	1.05702	0.08	0.576
1598	Uncharacterized protein, isoform C OS=Drosophila melanogaster GN=CG11883 PE=1 SV=1	7.952	7.934	7.825	7.847	8.019	7.691	7.902	7.708	7.795	7.751	0.903753	-0.146	0.092
1599	Probable histone-binding protein Caf1 OS=Drosophila melanogaster GN=Caf1 PE=1 SV=1	9.603	9.469	9.509	9.506	9.549	9.411	9.399	9.471	9.694	9.597	0.99103	-0.013	0.907
1600	CG8132 OS=Drosophila melanogaster GN=CG8132 PE=1 SV=1	10.041	9.884	9.708	9.917	10.214	9.859	10.014	10.065	10.495	10.445	1.16716	0.223	0.244
1601	Putative uncharacterized protein OS=Drosophila melanogaster GN=CG10254 PE=1 SV=1	8.121	8.141	8.438	8.375	7.98	8.206	8.003	8.067	8.173	7.859	0.901875	-0.149	0.283
1602	CG2269, isoform A OS=Drosophila melanogaster GN=CG2269 PE=1 SV=1	2.509	1.606	2.438	1.169	2.81	1.084	1.476	1.916	1.104	1.506	0.620284	-0.689	0.106
1603	Mushroom body defect, isoform L OS=Drosophila melanogaster GN=mud PE=1 SV=1	9.114	9.265	9.26	9.316	9.057	9.173	9.052	9.244	9.128	8.969	0.940174	-0.089	0.377
1604	Importin subunit beta OS=Drosophila melanogaster GN=Fs(2)Ket PE=2 SV=2	9.234	9.146	9.128	9.182	9.115	9.153	8.975	8.99	9.292	9.04	0.951978	-0.071	0.464
1605	Wings up A, isoform I OS=Drosophila melanogaster GN=wupA PE=1 SV=1	7.022	8.036	8.647	7.979	8.137	7.282	7.596	8.137	7.572	8.061	0.850274	-0.234	0.544
1606	CG3529, isoform D OS=Drosophila melanogaster GN=DmTOM1 PE=1 SV=1	4.915	4.861	4.717	4.982	4.826	5.221	5.12	4.633	4.635	4.722	1.00417	0.006	0.98
1607	CG6907, isoform B OS=Drosophila melanogaster GN=Dmel\CG6907 PE=4 SV=1	8.443	8.432	8.38	8.485	8.276	8.408	8.291	8.361	8.646	8.416	1.01466	0.021	0.852
1608	Uncharacterized protein, isoform A OS=Drosophila melanogaster GN=anon-73Bb PE=4 SV=2	2.357	3.434	3.49	3.347	3.059	3.377	2.798	3.072	3.28	2.596	0.924663	-0.113	0.737
1609	Dystroglycan, isoform D OS=Drosophila melanogaster GN=Dg PE=1 SV=1	9.568	9.493	9.483	9.496	9.559	9.433	9.253	9.493	9.713	9.695	0.998615	-0.002	0.987
1610	CG1635 OS=Drosophila melanogaster GN=CG1635 PE=1 SV=1	9.242	9.099	9.024	9.066	9.499	8.903	9.077	8.954	8.81	9.049	0.85441	-0.227	0.093
1611	CG7381, isoform A OS=Drosophila melanogaster GN=CG7381-RA PE=2 SV=3	7.385	7.254	7.476	7.73	7.978	7.454	8.382	7.985	7.55	7.888	1.2201	0.287	0.27
1612	Multiprotein bridging factor 1, isoform E OS=Drosophila melanogaster GN=mbf1 PE=1 SV=1	10.058	9.98	10.029	10.029	9.906	10.365	10.298	10.233	10.285	10.139	1.2008	0.264	0.005
1614	Gamma-glutamyl transpeptidase, isoform A OS=Drosophila melanogaster GN=Ggt-1 PE=2 SV=2	9.324	9.328	9.047	9.123	9.687	9.087	9.814	9.867	9.394	9.979	1.25353	0.326	0.191
1615	Protein associated with topo II related-1, isoform A OS=Drosophila melanogaster GN=Patr-1 PE=1 SV=1	7.927	7.924	7.977	7.964	7.705	8.035	8.001	7.827	7.991	7.964	1.04536	0.064	0.497
1616	Amun, isoform A OS=Drosophila melanogaster GN=Amun PE=1 SV=1	8.967	8.996	9.023	8.992	8.845	8.814	8.819	8.895	8.819	8.677	0.895025	-0.16	0.057
1617	LD05679p OS=Drosophila melanogaster GN=CG8446-RB PE=1 SV=1	8.953	9.079	8.871	8.952	9.022	9.399	8.936	9.15	9.05	9.051	1.10343	0.142	0.231
1618	FI06026p OS=Drosophila melanogaster GN=CG16898 PE=2 SV=1	4.608	4.786	4.883	4.442	5.603	10.644	10.759	10.666	10.722	10.856	58.2829	5.865	0
1619	Uncharacterized protein, isoform A OS=Drosophila melanogaster GN=CG17575 PE=4 SV=1	8.863	8.76	8.653	8.735	9.129	8.779	8.818	8.912	8.979	9.082	1.06142	0.086	0.523
1620	Dihydropteridine reductase OS=Drosophila melanogaster GN=Dhpr PE=1 SV=1	9.469	9.418	9.43	9.355	9.301	9.416	9.575	9.428	9.373	9.337	1.02172	0.031	0.726
1621	COP9 signalosome subunit 4, isoform B OS=Drosophila melanogaster GN=CSN4 PE=1 SV=1	8.821	8.785	8.725	8.829	8.8	8.795	8.635	8.696	8.845	8.711	0.962594	-0.055	0.472
1622	LP10861p OS=Drosophila melanogaster GN=Dmel\CG13887 PE=1 SV=1	9.593	9.441	9.408	9.454	9.415	9.774	10.018	9.801	9.836	9.813	1.30677	0.386	0.001
1623	RE40577p OS=Drosophila melanogaster GN=CG15096 PE=1 SV=1	5.79	6.182	6.181	6.165	5.597	6.918	6.555	6.759	6.537	6.734	1.6449	0.718	0.002
1624	CG2871 OS=Drosophila melanogaster GN=CG2871 PE=4 SV=2	7.793	7.969	8.175	8.176	7.781	7.97	7.837	8.185	7.924	7.724	0.965267	-0.051	0.756
1625	Formin 3, isoform B OS=Drosophila melanogaster GN=form3 PE=4 SV=1	6.909	6.789	6.796	6.948	6.477	7.116	6.896	6.786	6.7	6.553	1.01819	0.026	0.887
1626	NADH-cytochrome b5 reductase OS=Drosophila melanogaster GN=Dmel\CG5946 PE=1 SV=1	9.74	9.702	9.693	9.646	9.924	9.705	10.027	10.102	10.108	10.413	1.25701	0.33	0.048
1627	Protoporphyrinogen oxidase OS=Drosophila melanogaster GN=Ppox PE=1 SV=1	8.839	8.824	8.846	8.937	8.856	8.693	8.53	8.621	8.844	8.782	0.89131	-0.166	0.077
1628	Membrane-associated protein Hem OS=Drosophila melanogaster GN=Hem PE=2 SV=1	8.933	8.876	8.83	9.006	8.927	8.791	8.835	8.843	8.994	8.967	0.980779	-0.028	0.75
1629	FI03834p OS=Drosophila melanogaster GN=l(3)02640 PE=1 SV=1	9.339	9.438	9.354	9.521	9.146	8.734	8.491	8.524	8.721	8.493	0.587638	-0.767	0
1630	CG7966 OS=Drosophila melanogaster GN=CG7966 PE=1 SV=2	9.611	9.764	9.659	9.84	9.856	9.746	10.134	9.697	9.873	9.779	1.07177	0.1	0.425
1631	FI01423p OS=Drosophila melanogaster GN=GstE3 PE=1 SV=1	9.983	10.033	9.77	9.802	9.892	9.842	10.186	10.103	10.265	10.197	1.16716	0.223	0.076
1632	CG9259, isoform A OS=Drosophila melanogaster GN=Dmel\CG9259 PE=2 SV=1	9.287	9.541	9.434	9.435	9.749	9.286	9.962	9.926	9.811	10.188	1.27103	0.346	0.107
1633	Acyl-coenzyme A oxidase OS=Drosophila melanogaster GN=Dmel\CG17544 PE=1 SV=2	9.299	9.363	8.989	9.134	9.206	9.169	9.205	9.296	9.121	9.26	1.00835	0.012	0.92
1634	CG4849 OS=Drosophila melanogaster GN=CG4849 PE=1 SV=1	8.525	8.558	8.628	8.497	8.458	8.812	8.673	8.57	8.577	8.539	1.07252	0.101	0.261
1635	Putative ATP synthase subunit f, mitochondrial OS=Drosophila melanogaster GN=CG4692 PE=3 SV=1	10.629	10.451	10.316	10.301	10.536	9.071	9.074	9.312	9.495	9.431	0.444421	-1.17	0
1636	CG5973, isoform A OS=Drosophila melanogaster GN=Dmel\CG5973 PE=2 SV=2	10.046	10.204	10.044	10.228	10.215	10.01	10.273	10.335	10.358	10.403	1.09278	0.128	0.259
1637	NADH dehydrogenase [ubiquinone] 1 beta subcomplex subunit 8, mitochondrial OS=Drosophila melanogaster GN=ND-ASHI PE=1 SV=1	9.99	9.986	9.94	9.908	10.124	8.657	8.695	8.661	8.734	8.714	0.406972	-1.297	0
1638	Niemann-Pick type C-1a, isoform A OS=Drosophila melanogaster GN=Npc1a PE=1 SV=2	9.265	9.221	9.349	9.262	8.938	9.417	9.118	9.162	9.264	9.055	0.997231	-0.004	0.982
1639	Probable phosphomannomutase OS=Drosophila melanogaster GN=CG10688 PE=2 SV=1	9.236	9.415	9.335	9.36	9.328	9.549	9.649	9.546	9.466	9.466	1.1487	0.2	0.02
1640	Actin related complex p41 subunit OS=Drosophila melanogaster GN=Arpc1 PE=1 SV=1	9.005	8.871	8.756	8.713	8.94	8.928	8.942	9.011	9.047	9.161	1.11806	0.161	0.115
1641	CG6357 OS=Drosophila melanogaster GN=CG6357 PE=1 SV=1	8.883	8.625	8.784	8.491	9.15	9.343	9.565	9.588	9.741	9.837	1.77522	0.828	0.001
1642	60S ribosomal protein L23 OS=Drosophila melanogaster GN=RpL23 PE=1 SV=2	8.683	8.621	8.649	8.804	8.673	8.81	8.878	8.801	8.872	8.743	1.09809	0.135	0.079
1643	N-acetylgalactosaminyltransferase 7 OS=Drosophila melanogaster GN=GalNAc-T2 PE=2 SV=2	8.798	8.937	8.902	8.884	8.681	8.87	8.744	8.872	8.753	8.565	0.946058	-0.08	0.452
1644	60S ribosomal protein L31 OS=Drosophila melanogaster GN=RpL31 PE=1 SV=1	9.903	10.05	9.931	10.075	9.638	10.321	10.269	10.156	10.193	10.058	1.21419	0.28	0.033
1645	Uncharacterized protein OS=Drosophila melanogaster GN=CG14630 PE=4 SV=2	8.567	8.663	8.769	8.775	9.069	9.482	9.396	9.339	9.322	9.298	1.51467	0.599	0
1646	CG9641, isoform A OS=Drosophila melanogaster GN=Dmel\CG9641 PE=1 SV=1	9.087	9.205	9.004	9.283	9.294	9.16	9.063	9.356	9.309	9.082	1.01326	0.019	0.883
1647	Eukaryotic translation initiation factor 4E OS=Drosophila melanogaster GN=eIF-4E PE=1 SV=1	8.842	8.868	8.824	8.92	8.822	8.804	8.842	8.912	8.968	8.898	1.0203	0.029	0.692
1648	Purine-rich binding protein-alpha, isoform B OS=Drosophila melanogaster GN=Pur-alpha PE=4 SV=2	8.527	8.596	8.52	8.528	8.501	8.442	8.563	8.454	8.423	8.489	0.959264	-0.06	0.375
1649	Serine/threonine-protein kinase OS=Drosophila melanogaster GN=PKD PE=3 SV=1	7.09	7.188	6.859	7.123	7.471	7.018	7.159	7.093	7.004	6.933	0.929805	-0.105	0.461
1650	Neurotactin, isoform C OS=Drosophila melanogaster GN=Nrt PE=4 SV=1	8.43	8.419	8.349	8.381	8.394	8.616	8.551	8.56	8.597	8.679	1.15349	0.206	0.007
1651	CG8136, isoform B OS=Drosophila melanogaster GN=CG8136 PE=4 SV=2	8.682	8.724	8.672	8.61	8.602	8.709	8.305	8.577	8.62	8.189	0.883928	-0.178	0.19
1652	Exocyst complex component 4 OS=Drosophila melanogaster GN=Sec8 PE=1 SV=3	8.339	8.239	8.247	8.281	8.293	8.474	8.431	8.364	8.268	8.319	1.06511	0.091	0.228
1653	FI11533p OS=Drosophila melanogaster GN=spaw PE=2 SV=1	8.874	9.047	8.878	8.899	8.808	7.954	7.616	7.852	7.79	7.573	0.452503	-1.144	0
1654	Uncharacterized protein OS=Drosophila melanogaster GN=Dmel\CG14961 PE=1 SV=1	8.965	8.375	9.584	9.123	8.335	9.006	8.469	7.916	9.384	9.111	0.93368	-0.099	0.836
1655	Complexin, isoform W OS=Drosophila melanogaster GN=cpx PE=1 SV=1	7.006	6.955	7.141	7.146	7.113	6.979	7.078	6.849	6.513	6.689	0.840314	-0.251	0.086
1656	Odorant binding protein c OS=Drosophila melanogaster GN=Obp51a PE=2 SV=1	9.795	9.597	9.316	9.63	10.169	9.355	9.868	10.245	9.747	10.42	1.16878	0.225	0.44
1657	CG6178 OS=Drosophila melanogaster GN=CG6178 PE=1 SV=1	9.177	9.202	8.905	9.112	8.961	9.18	9.282	9.054	8.95	8.992	1.01396	0.02	0.881
1658	Uncharacterized protein, isoform B OS=Drosophila melanogaster GN=ringer PE=4 SV=1	10.485	10.419	10.327	10.308	10.738	9.891	10.02	10.108	10.17	10.237	0.773782	-0.37	0.013
1659	Ubiquitinyl hydrolase 1 OS=Drosophila melanogaster GN=Usp16-45 PE=1 SV=1	7.923	8.14	8.167	8.083	7.765	8.42	8.208	8.097	8.095	8.012	1.11034	0.151	0.273
1660	CG4984, isoform C OS=Drosophila melanogaster GN=CG4984-RC PE=2 SV=1	8.467	8.443	8.452	8.45	8.617	8.286	8.102	8.282	8.159	8.176	0.820742	-0.285	0.004
1661	Lethal (2) k14710, isoform A OS=Drosophila melanogaster GN=l(2)k14710 PE=2 SV=1	8.685	8.686	8.609	8.52	8.738	8.624	8.572	8.533	8.507	8.6	0.946058	-0.08	0.301
1662	CG2528, isoform E OS=Drosophila melanogaster GN=Dmel\CG2528 PE=4 SV=4	9.396	9.422	9.439	9.449	9.378	8.694	8.204	8.491	8.748	8.343	0.528143	-0.921	0
1663	Uncharacterized protein, isoform B OS=Drosophila melanogaster GN=Dmel\CG32164 PE=4 SV=1	6.658	6.281	6.268	6.483	6.791	5.533	5.473	5.994	6.992	6.814	0.792784	-0.335	0.413
1664	Desaturase 1, isoform A OS=Drosophila melanogaster GN=Desat1 PE=1 SV=1	9.885	9.97	9.905	10.131	9.833	9.882	9.829	9.828	9.938	9.729	0.93045	-0.104	0.27
1665	General vesicular transport factor p115 OS=Drosophila melanogaster GN=p115 PE=1 SV=2	8.707	8.727	8.712	8.791	8.691	8.739	8.871	8.808	8.858	8.877	1.07549	0.105	0.127
1666	CG9577 OS=Drosophila melanogaster GN=CG9577 PE=1 SV=2	10.22	10.191	9.96	9.982	10.051	9.462	9.584	9.797	10.098	10.008	0.817335	-0.291	0.092
1667	Keratin, type II cuticular Hb6 OS=Homo sapiens GN=KRT86 PE=1 SV=1	11.019	3.957	2.833	2.906	2.789	4.762	4.537	4.911	4.25	4.391	0.913198	-0.131	0.957
1668	LD28380p OS=Drosophila melanogaster GN=anon-WO0140519.52 PE=1 SV=1	8.27	8.388	8.514	8.461	8.152	8.691	8.101	8.259	8.435	8.084	0.970634	-0.043	0.818
1669	Kugelkern, isoform A OS=Drosophila melanogaster GN=kuk PE=1 SV=1	9.171	9.402	9.292	9.271	9.208	8.959	9.066	8.849	8.605	8.733	0.744323	-0.426	0.004
1670	Female sterile (1) homeotic, isoform G OS=Drosophila melanogaster GN=fs(1)h PE=1 SV=1	7.397	7.565	7.407	7.478	7.385	7.692	7.585	7.551	7.7	7.652	1.14076	0.19	0.026
1671	CG9416, isoform A OS=Drosophila melanogaster GN=CG9416 PE=2 SV=1	9.039	9.059	8.957	9.03	9.097	8.911	8.892	8.901	8.844	8.792	0.890076	-0.168	0.025
1672	FI03887p OS=Drosophila melanogaster GN=TrpRS-m PE=1 SV=1	8.47	8.433	8.585	8.67	8.676	8.515	8.272	8.347	8.531	8.473	0.908148	-0.139	0.179
1673	Aminopeptidase OS=Drosophila melanogaster GN=CG8774 PE=1 SV=3	8.145	8.16	8.148	8.329	8.448	8.084	8.46	8.363	8.557	8.625	1.12662	0.172	0.244
1674	Protein transport protein Sec61 subunit beta OS=Drosophila melanogaster GN=Sec61beta PE=1 SV=1	9.118	8.969	8.911	8.834	8.823	8.921	9.049	9.038	8.998	9.085	1.06216	0.087	0.348
1675	Dynein light chain 2, cytoplasmic OS=Drosophila melanogaster GN=Cdlc2 PE=3 SV=1	6.09	5.979	6.189	6.243	5.969	5.801	5.685	6.009	6.233	5.52	0.844401	-0.244	0.162
1676	Probable cytochrome P450 313a1 OS=Drosophila melanogaster GN=Cyp313a1 PE=3 SV=2	8.611	8.809	8.562	8.681	8.847	9.254	9.556	9.456	9.098	9.36	1.56157	0.643	0
1677	Alpha-mannosidase OS=Drosophila melanogaster GN=LManIII PE=1 SV=2	6.408	6.917	7.049	7.31	7.012	7.287	8.428	7.964	7.426	7.821	1.79751	0.846	0.014
1678	Stoned B, isoform G OS=Drosophila melanogaster GN=stnB PE=4 SV=1	8.417	8.438	8.307	8.234	8.55	8.149	8.058	8.283	8.122	8.344	0.871758	-0.198	0.076
1679	Probable 6-phosphogluconolactonase OS=Drosophila melanogaster GN=CG17333 PE=2 SV=1	9.684	9.73	9.588	9.694	9.932	9.57	9.637	9.452	9.576	9.473	0.880259	-0.184	0.07
1680	CG2065, isoform A OS=Drosophila melanogaster GN=CG2065 PE=1 SV=1	7.868	7.812	7.826	7.83	7.707	8.902	9.15	9.092	8.878	8.975	2.28311	1.191	0
1681	LD41874p OS=Drosophila melanogaster GN=Dmel\CG10237 PE=1 SV=2	9.016	8.988	8.976	9.078	8.946	8.888	9.105	8.937	9.096	9.076	1.01396	0.02	0.83
1682	CG7946, isoform A OS=Drosophila melanogaster GN=CG7946 PE=1 SV=1	8.795	8.683	8.678	8.616	8.674	8.702	8.54	8.645	8.671	8.649	0.967276	-0.048	0.53
1683	CG3566, isoform D OS=Drosophila melanogaster GN=CG3566 PE=1 SV=1	9.452	9.393	9.359	9.486	9.61	9.496	9.43	9.514	9.959	9.727	1.12117	0.165	0.241
1684	Phosphatidylinositol 5-phosphate 4-kinase, isoform A OS=Drosophila melanogaster GN=PIP4K PE=1 SV=1	8.999	9.008	8.931	8.903	9.107	8.971	8.999	9.063	8.889	9.018	0.998615	-0.002	0.987
1685	Ethanolamine kinase OS=Drosophila melanogaster GN=eas PE=1 SV=2	8.707	8.732	8.629	8.591	8.982	8.482	8.814	8.628	8.805	8.97	1.00835	0.012	0.947
1686	Ubiquitin conjugating enzyme 4, isoform B OS=Drosophila melanogaster GN=Ubc4 PE=1 SV=1	9.58	9.689	9.711	9.377	9.218	10.325	9.791	10.101	10.185	10.055	1.49071	0.576	0.004
1687	Mushroom-body expressed, isoform K OS=Drosophila melanogaster GN=mub PE=1 SV=1	9.605	9.302	9.281	9.427	9.426	9.558	9.201	9.263	9.618	9.451	1.00696	0.01	0.954
1688	Uncharacterized protein, isoform A OS=Drosophila melanogaster GN=CG31087 PE=1 SV=2	9.221	9.116	9.269	9.153	9.465	9.856	10.291	10.184	9.956	10.226	1.81252	0.858	0
1689	Rho GTPase activating protein at 92B, isoform C OS=Drosophila melanogaster GN=RhoGAP92B PE=1 SV=1	6.208	5.792	6.138	6.174	5.849	6.015	5.94	5.697	5.849	5.837	0.891929	-0.165	0.229
1690	Clot protein OS=Drosophila melanogaster GN=cl PE=1 SV=1	8.788	8.645	8.698	9.036	9.802	8.294	8.581	8.572	9.065	9.325	0.85441	-0.227	0.522
1691	Proteasome subunit alpha type-5 OS=Drosophila melanogaster GN=Prosalpha5 PE=2 SV=2	8.834	8.808	8.689	8.947	9.049	8.539	9.012	8.889	9.221	9.177	1.07326	0.102	0.571
1692	CG7627, isoform A OS=Drosophila melanogaster GN=Dme_CG7627 PE=1 SV=2	7.249	7.349	7.152	7.249	7.42	7.202	7.43	7.257	7.155	7.306	0.990343	-0.014	0.901
1693	Dynein light chain 1, cytoplasmic OS=Drosophila melanogaster GN=ctp PE=1 SV=1	6.725	6.71	6.563	6.565	6.893	6.358	6.672	6.614	6.874	6.821	0.983502	-0.024	0.886
1694	SET and MYND domain containing, arthropod-specific, member 2 OS=Drosophila melanogaster GN=SmydA-2 PE=4 SV=1	9.359	9.281	9.22	9.264	9.278	8.395	7.918	8.153	8.185	8.283	0.468786	-1.093	0
1695	Exo84 ortholog, isoform B OS=Drosophila melanogaster GN=Exo84 PE=1 SV=1	7.819	7.939	7.725	7.727	7.853	7.769	7.828	7.785	7.803	7.865	0.997923	-0.003	0.98
1696	CG1907 OS=Drosophila melanogaster GN=CG1907 PE=1 SV=1	9.436	9.487	9.316	9.335	9.604	9.601	9.777	9.75	9.565	9.762	1.19334	0.255	0.021
1697	Tyrosine-protein kinase Src42A OS=Drosophila melanogaster GN=Src42A PE=1 SV=1	10.076	10.058	10.066	10.091	10.264	9.968	10.05	10.225	10.274	10.359	1.04536	0.064	0.588
1698	GH09530p OS=Drosophila melanogaster GN=CG32521-RB PE=1 SV=2	8.247	8.02	8.289	7.887	8.124	8.408	8.683	8.684	8.293	8.56	1.33053	0.412	0.01
1699	SET and MYND domain containing, arthropod-specific, member 3, isoform C OS=Drosophila melanogaster GN=SmydA-3 PE=4 SV=1	9.494	9.453	9.423	9.444	9.211	8.6	8.075	8.157	8.367	8.293	0.464258	-1.107	0
1700	AT08565p OS=Drosophila melanogaster GN=Txl PE=1 SV=1	8.998	8.843	8.959	8.951	9.071	9.135	9.069	9.072	9.114	9.052	1.08975	0.124	0.103
1701	Glutathione S transferase E12, isoform A OS=Drosophila melanogaster GN=GstE12 PE=1 SV=1	9.561	9.66	9.505	9.683	9.855	9.503	9.844	9.77	10.078	10.018	1.14076	0.19	0.218
1702	NADH dehydrogenase (Ubiquinone) B16.6 subunit, isoform A OS=Drosophila melanogaster GN=ND-B16.6 PE=1 SV=1	10.123	10.056	10.106	10.104	10.182	8.785	8.682	8.733	8.67	8.646	0.376051	-1.411	0
1703	DSec61alpha OS=Drosophila melanogaster GN=Sec61alpha PE=1 SV=1	9.861	9.874	9.837	9.865	9.667	9.865	9.79	9.739	9.964	9.784	1.00486	0.007	0.946
1704	Uncharacterized protein, isoform E OS=Drosophila melanogaster GN=CG12213 PE=1 SV=3	9.314	9.246	9.373	9.432	9.418	9.05	9.172	8.901	8.932	8.977	0.784584	-0.35	0.002
1705	LD40177p OS=Drosophila melanogaster GN=CG11208 PE=1 SV=1	9.286	9.231	9.155	9.324	9.27	8.931	9.078	9.036	9.233	9.227	0.899378	-0.153	0.118
1706	Sorting nexin OS=Drosophila melanogaster GN=SH3PX1 PE=1 SV=1	8.682	8.578	8.777	8.509	8.574	8.731	8.768	8.791	8.702	8.756	1.09126	0.126	0.131
1707	CG5377 OS=Drosophila melanogaster GN=CG5377-RA PE=1 SV=1	9.078	9.033	8.881	9.083	9.293	9.642	9.887	10.034	10.06	10.122	1.83401	0.875	0
1708	GH03051p OS=Drosophila melanogaster GN=Gclm PE=1 SV=1	9.848	9.858	9.602	9.734	10.059	9.586	9.804	9.668	9.673	9.594	0.898132	-0.155	0.187
1709	RE68566p OS=Drosophila melanogaster GN=Dmel\CG13893 PE=1 SV=1	8.81	8.958	8.714	8.784	8.708	9.039	9	8.912	8.947	8.982	1.13367	0.181	0.04
1710	CG9336, isoform A OS=Drosophila melanogaster GN=BcDNA:RE71975 PE=1 SV=1	9.442	9.172	9.188	9.129	9.503	8.894	9.142	9.099	8.859	9.117	0.832199	-0.265	0.053
1711	CG9248, isoform A OS=Drosophila melanogaster GN=Dmel\CG9248 PE=1 SV=1	8.92	8.679	8.697	8.768	8.799	8.728	8.67	8.803	9.206	9.011	1.07998	0.111	0.44
1712	Smooth, isoform G OS=Drosophila melanogaster GN=sm PE=1 SV=1	5.168	5.336	5.438	5.273	4.789	6.307	5.64	6.199	5.592	5.506	1.56699	0.648	0.019
1713	Cytochrome c oxidase assembly factor 7 homolog OS=Drosophila melanogaster GN=CG13865 PE=2 SV=1	10.102	10.099	10.033	10.088	10.026	9.581	9.432	9.512	9.696	9.565	0.700764	-0.513	0
1714	Eukaryotic translation initiation factor 3 subunit G-A OS=Drosophila melanogaster GN=eIF3ga PE=1 SV=1	9.915	9.889	9.855	9.976	9.814	9.677	9.65	9.516	9.853	9.642	0.857376	-0.222	0.027
1715	C-terminal binding protein, isoform H OS=Drosophila melanogaster GN=CtBP PE=1 SV=1	9.319	9.2	9.22	9.213	9.22	9.101	9.034	9.217	9.345	9.247	0.968618	-0.046	0.631
1716	Voltage-dependent calcium channel type D subunit alpha-1 OS=Drosophila melanogaster GN=Ca-alpha1D PE=1 SV=2	8.096	7.955	8.093	8.03	8.164	7.809	7.865	7.854	8.009	8.262	0.927873	-0.108	0.38
1717	MIP14966p OS=Drosophila melanogaster GN=CG14762-RA PE=1 SV=1	9.49	9.278	9.358	9.236	9.37	9.306	9.331	9.176	9.321	9.221	0.949342	-0.075	0.382
1718	Sulfhydryl oxidase OS=Drosophila melanogaster GN=CG6690 PE=4 SV=1	8.696	8.931	8.612	8.697	9.452	7.74	8.447	8.293	7.902	8.456	0.61132	-0.71	0.015
1719	LD23303p OS=Drosophila melanogaster GN=tst PE=2 SV=2	7.633	7.55	7.51	7.491	7.6	8.032	7.893	7.779	7.898	7.869	1.26313	0.337	0.001
1720	CG9975, isoform A OS=Drosophila melanogaster GN=fest PE=2 SV=1	8.703	8.921	8.741	8.734	8.757	8.468	8.484	8.775	8.747	8.488	0.883315	-0.179	0.112
1721	Ubiquitin specific protease 2, isoform I OS=Drosophila melanogaster GN=Usp2 PE=3 SV=1	1.69	0.654	1.893	0.362	0.402	1.569	0.583	1.431	0.742	1.681	1.14949	0.201	0.695
1722	AT06125p OS=Drosophila melanogaster GN=CG6195 PE=1 SV=1	9.462	9.421	9.401	9.467	9.647	9.377	9.55	9.53	9.719	9.742	1.07475	0.104	0.355
1723	Alpha-tubulin N-acetyltransferase OS=Drosophila melanogaster GN=Dmel\CG3967 PE=3 SV=1	2.246	1.448	2.143	2.135	2.256	3.645	2.706	2.179	3.338	2.978	1.89737	0.924	0.02
1724	Heat shock 70 kDa protein cognate 2 OS=Drosophila melanogaster GN=Hsc70-2 PE=1 SV=2	8.639	8.664	8.913	8.83	8.429	8.528	7.867	8.185	8.096	7.849	0.664343	-0.59	0.007
1725	Uncharacterized protein, isoform B OS=Drosophila melanogaster GN=BcDNA:GH27779 PE=1 SV=1	8.197	8.353	8.212	8.301	8.389	8.5	8.581	8.614	8.227	8.441	1.13446	0.182	0.104
1726	Bifunctional methylenetetrahydrofolate dehydrogenase/cyclohydrolase, mitochondrial OS=Drosophila melanogaster GN=Nmdmc PE=2 SV=2	8.455	8.404	8.496	8.539	8.287	8.989	9.122	9.043	9.029	9.123	1.54221	0.625	0
1727	Pleckstrin homology domain-containing family F member 1 homolog OS=Drosophila melanogaster GN=rush PE=1 SV=1	9.31	9.145	9.159	9.268	9.405	8.977	9.233	9.23	9.348	9.356	0.980099	-0.029	0.825
1728	Complexin OS=Drosophila melanogaster GN=cpx PE=2 SV=1	4.545	4.672	4.812	4.816	4.757	4.886	5.142	4.735	4.426	4.476	1.00905	0.013	0.956
1729	Probable cytochrome P450 9f2 OS=Drosophila melanogaster GN=Cyp9f2 PE=2 SV=1	9.357	9.159	9.118	9.134	9.478	9.327	9.619	9.593	10	10.114	1.39571	0.481	0.028
1730	Uncharacterized protein, isoform B OS=Drosophila melanogaster GN=CG16817 PE=1 SV=1	9.537	9.491	9.456	9.586	9.585	9.436	9.486	9.383	9.718	9.494	0.981459	-0.027	0.791
1731	Uncharacterized protein, isoform B OS=Drosophila melanogaster GN=CG42788 PE=4 SV=3	7.119	7.315	7.043	7.14	7.273	6.9	7	7.109	6.914	6.949	0.868742	-0.203	0.043
1732	Histone H1 OS=Drosophila melanogaster GN=His1 PE=1 SV=1	9.037	9.635	9.591	9.725	9.181	9.909	9.948	10.192	10.224	10.169	1.57462	0.655	0.004
1733	LP01562p OS=Drosophila melanogaster GN=veil PE=1 SV=1	7.505	7.535	7.208	7.464	7.644	7.213	7.721	7.649	7.532	7.87	1.09126	0.126	0.464
1734	Melanization protease 1 OS=Drosophila melanogaster GN=MP1 PE=1 SV=1	7.175	6.927	7.293	7.026	7.154	7.091	7.247	7.255	6.948	7.24	1.02883	0.041	0.751
1735	CG1105 OS=Drosophila melanogaster GN=CG1105 PE=1 SV=1	8.906	8.901	8.938	8.792	8.989	9.004	9.048	8.868	8.72	8.747	0.980779	-0.028	0.811
1736	CG5999 OS=Drosophila melanogaster GN=CG5999 PE=4 SV=2	6.029	5.94	6.06	6.108	6.229	10.395	9.862	10.389	9.81	10.227	16.7142	4.063	0
1737	AP-3 complex subunit beta OS=Drosophila melanogaster GN=rb PE=1 SV=1	7.698	7.701	7.751	7.778	7.652	7.81	7.759	7.7	7.637	7.698	1.00347	0.005	0.958
1738	Catenin alpha OS=Drosophila melanogaster GN=alpha-Cat PE=1 SV=2	8.568	8.769	8.703	8.701	8.626	9.02	8.848	8.831	8.879	8.891	1.16473	0.22	0.015
1739	QKR58E-3 OS=Drosophila melanogaster GN=qkr58E-3 PE=1 SV=1	7.724	7.84	7.943	7.776	7.876	7.976	7.973	8.027	8.106	7.783	1.10267	0.141	0.151
1740	GH14572p OS=Drosophila melanogaster GN=Gbp2 PE=1 SV=1	7.248	6.966	7.228	7.054	7.159	7.388	7.805	7.706	7.395	7.523	1.3491	0.432	0.006
1741	Ribosomal protein S5a, isoform B OS=Drosophila melanogaster GN=RpS5a PE=3 SV=1	9.5	9.437	9.421	9.511	9.469	9.565	9.626	9.504	9.939	9.705	1.14949	0.201	0.075
1742	CG9775, isoform A OS=Drosophila melanogaster GN=CG9775 PE=1 SV=1	8.44	8.458	8.309	8.2	8.41	8.089	8.242	8.263	8.116	8.309	0.895025	-0.16	0.104
1743	CG2970, isoform A OS=Drosophila melanogaster GN=CG2970 PE=1 SV=2	9.021	8.951	8.823	8.999	9.158	8.967	8.922	8.92	8.915	8.951	0.962594	-0.055	0.537
1744	Mitochondrial ribosomal protein L46 OS=Drosophila melanogaster GN=mRpL46 PE=1 SV=1	9.21	9.317	9.428	9.474	8.917	8.61	8.416	8.382	8.617	8.346	0.576343	-0.795	0
1745	Fructose-1,6-bisphosphatase, isoform F OS=Drosophila melanogaster GN=fbp PE=1 SV=1	10.909	10.762	10.676	10.862	11.126	10.335	10.657	10.389	10.589	10.458	0.767905	-0.381	0.01
1746	GM04779p OS=Drosophila melanogaster GN=SrpRbeta PE=1 SV=2	9.542	9.613	9.682	9.635	9.37	9.79	9.726	9.81	9.936	9.704	1.16878	0.225	0.035
1747	Fumarylacetoacetase OS=Drosophila melanogaster GN=Faa PE=1 SV=2	9.272	9.15	9.225	9.331	9.369	8.859	9.065	8.908	9.536	9.498	0.935623	-0.096	0.626
1748	CG6950, isoform A OS=Drosophila melanogaster GN=CG6950-RC PE=1 SV=1	8.846	8.583	8.422	8.635	9.097	8.448	8.673	8.877	9.031	9.165	1.08824	0.122	0.585
1749	CG8128, isoform A OS=Drosophila melanogaster GN=CG8128 PE=2 SV=1	9.874	9.945	9.785	9.922	9.865	9.802	9.747	9.727	9.745	9.75	0.91764	-0.124	0.075
1750	Nucleotide exchange factor SIL1 OS=Drosophila melanogaster GN=CG10420 PE=2 SV=1	8.148	8.203	8.084	8.18	8.013	8.609	8.53	8.698	8.572	8.706	1.41128	0.497	0
1751	CG6834 OS=Drosophila melanogaster GN=CG6834-RA PE=2 SV=3	8.942	9.123	8.745	8.939	9.161	9.494	9.687	9.616	9.359	9.706	1.50525	0.59	0.001
1752	Uncharacterized protein, isoform A OS=Drosophila melanogaster GN=Dmel\CG10960 PE=1 SV=1	7.048	7.426	7.526	7.336	6.902	7.635	7.644	7.418	7.294	7.058	1.11884	0.162	0.428
1753	Alkyldihydroxyacetonephosphate synthase OS=Drosophila melanogaster GN=ADPS PE=2 SV=1	8.814	8.739	8.825	8.842	8.707	8.971	8.963	9.05	9.012	8.814	1.13053	0.177	0.04
1754	Drab5 OS=Drosophila melanogaster GN=Rab5 PE=1 SV=1	9.753	9.522	9.405	9.454	9.726	9.318	9.353	9.482	9.808	9.804	0.986917	-0.019	0.92
1755	LD25561p OS=Drosophila melanogaster GN=ND-30 PE=1 SV=1	9.73	9.726	9.631	9.703	9.904	8.237	8.275	8.489	8.696	8.548	0.408951	-1.29	0
1756	Rae1 OS=Drosophila melanogaster GN=Rae1 PE=1 SV=1	8.382	8.408	8.41	8.323	8.325	8.435	8.383	8.451	8.533	8.568	1.07475	0.104	0.158
1757	Lipid droplet-associated hydrolase OS=Drosophila melanogaster GN=CG9186 PE=2 SV=1	9.373	9.468	9.355	9.432	9.183	9.861	9.77	9.641	10.005	9.634	1.33793	0.42	0.004
1758	AT12494p OS=Drosophila melanogaster GN=ND-B22 PE=1 SV=1	9.633	9.631	9.592	9.613	9.832	7.887	8.128	8.316	8.313	8.253	0.35824	-1.481	0
1759	Proteasome subunit beta type OS=Drosophila melanogaster GN=Prosbeta5 PE=1 SV=1	8.649	8.863	8.636	8.779	8.621	8.832	8.941	9.072	9.109	8.982	1.21251	0.278	0.014
1760	CG1486, isoform A OS=Drosophila melanogaster GN=CG1486 PE=1 SV=1	8.419	8.404	8.421	8.268	8.224	8.333	8.475	8.359	8.365	8.381	1.02456	0.035	0.681
1761	Proteasome subunit beta type OS=Drosophila melanogaster GN=Prosbeta2 PE=1 SV=1	9.252	9.283	9.077	9.326	9.308	9.056	9.275	9.148	9.296	9.315	0.978742	-0.031	0.772
1762	CG4300, isoform D OS=Drosophila melanogaster GN=anon-WO0118547.387 PE=1 SV=1	9.915	10.05	10.016	9.994	9.952	10.1	10.205	10.178	9.892	10.077	1.07549	0.105	0.253
1763	Glutamate carrier 1, isoform A OS=Drosophila melanogaster GN=GC1 PE=1 SV=1	9.749	9.641	9.445	9.655	10.056	9.296	9.604	9.689	9.9	9.954	0.986233	-0.02	0.929
1764	Transmembrane 9 superfamily member OS=Drosophila melanogaster GN=TM9SF2 PE=1 SV=1	8.784	8.808	8.786	8.727	8.605	8.794	8.828	8.751	8.803	8.642	1.01537	0.022	0.812
1765	Protein I'm not dead yet OS=Drosophila melanogaster GN=Indy PE=2 SV=2	9.634	9.669	9.567	9.661	9.799	9.464	9.731	9.59	9.471	9.667	0.944747	-0.082	0.402
1766	GH01142p OS=Drosophila melanogaster GN=CG11400 PE=2 SV=1	8.849	8.92	8.466	8.718	9.17	9.172	9.589	9.389	9.014	9.301	1.38319	0.468	0.025
1767	CG5323 OS=Drosophila melanogaster GN=CG5323 PE=1 SV=1	9.65	9.428	9.608	9.696	9.716	8.644	8.554	8.588	8.899	8.891	0.534033	-0.905	0
1768	Proteasome subunit beta type-4 OS=Drosophila melanogaster GN=Prosbeta7 PE=2 SV=1	8.78	8.829	8.7	8.813	8.776	8.752	8.835	8.888	8.974	8.916	1.06659	0.093	0.231
1769	Innexin OS=Drosophila melanogaster GN=Inx2 PE=1 SV=1	9.61	9.778	9.718	9.741	9.935	9.767	9.95	9.788	9.608	9.719	1.00696	0.01	0.936
1770	RE44624p OS=Drosophila melanogaster GN=BcDNA:RE44624 PE=1 SV=1	7.405	7.657	7.405	7.335	7.421	8.021	8.06	8.074	7.718	7.975	1.43893	0.525	0.001
1771	Nuclear pore complex protein Nup160 homolog OS=Drosophila melanogaster GN=Nup160 PE=1 SV=1	8.378	8.367	8.485	8.416	8.289	8.6	8.492	8.484	8.515	8.525	1.09885	0.136	0.071
1772	Probable cytochrome P450 6a20 OS=Drosophila melanogaster GN=Cyp6a20 PE=2 SV=2	10.692	10.621	10.581	10.736	10.922	5.27	5.198	5.365	4.829	5.075	0.0211529	-5.563	0
1773	Mitochondrial ribosomal protein S5, isoform A OS=Drosophila melanogaster GN=mRpS5 PE=1 SV=1	9.088	9.163	9.314	9.335	8.904	8.589	8.366	8.539	8.695	8.571	0.655651	-0.609	0.001
1774	Actin-related protein 2 OS=Drosophila melanogaster GN=Arp2 PE=2 SV=3	9.332	9.285	9.302	9.211	9.224	9.13	9.261	9.2	9.139	9.213	0.944747	-0.082	0.239
1775	Gilgamesh, isoform E OS=Drosophila melanogaster GN=gish PE=1 SV=1	3.647	2.792	0.771	3.169	4.416	2.828	0.863	3.263	4.869	4.696	1.27015	0.345	0.783
1776	Kinesin-like protein OS=Drosophila melanogaster GN=Klp10A PE=1 SV=1	8.563	8.624	8.733	8.656	8.187	8.727	8.626	8.63	8.528	8.431	1.02527	0.036	0.819
1777	CG8834 OS=Drosophila melanogaster GN=CG8834 PE=1 SV=1	9.862	9.974	9.42	9.621	9.726	9.867	10.453	10.104	9.81	10.147	1.27987	0.356	0.069
1778	Uncharacterized protein, isoform A OS=Drosophila melanogaster GN=38C.53 PE=4 SV=2	8.066	7.926	8.284	8.109	8.101	8.573	8.632	8.575	8.918	8.745	1.50733	0.592	0
1779	FI08349p OS=Drosophila melanogaster GN=BcDNA:AT30027 PE=1 SV=1	9.043	9.098	9.257	9.282	8.983	8.978	8.744	8.866	8.897	8.598	0.803294	-0.316	0.019
1780	Uncharacterized protein, isoform C OS=Drosophila melanogaster GN=CG43658 PE=1 SV=1	6.088	5.808	6.012	5.83	6.051	6.646	6.527	6.405	6.298	6.33	1.39862	0.484	0.002
1781	Ribosomal protein L18, isoform B OS=Drosophila melanogaster GN=RpL18 PE=4 SV=1	8.729	8.536	8.536	8.67	9.077	8.469	8.743	8.788	9.171	9.137	1.11111	0.152	0.469
1782	Upf1, isoform B OS=Drosophila melanogaster GN=Upf1 PE=4 SV=1	7.838	7.863	7.9	7.706	7.514	8.138	8.118	7.963	7.917	7.852	1.17528	0.233	0.066
1783	GH06117p OS=Drosophila melanogaster GN=pst PE=2 SV=2	8.563	8.502	8.641	8.474	8.304	8.528	8.351	8.343	8.399	8.456	0.945402	-0.081	0.407
1784	Cytosolic Fe-S cluster assembly factor NUBP1 homolog OS=Drosophila melanogaster GN=CG17904 PE=2 SV=1	8.75	8.572	8.548	8.563	8.873	8.681	8.569	8.691	8.781	8.83	1.03455	0.049	0.673
1785	Mitogen-activated protein kinase ERK-A OS=Drosophila melanogaster GN=rl PE=1 SV=3	9.235	9.081	9.01	9.231	9.183	8.737	8.771	8.858	8.791	8.872	0.788947	-0.342	0.002
1786	Uncharacterized protein, isoform P OS=Drosophila melanogaster GN=CG42672 PE=1 SV=5	8.145	8.336	8.046	8.085	8.269	7.907	8.243	8.279	7.999	8.235	0.969962	-0.044	0.748
1787	CG2663, isoform A OS=Drosophila melanogaster GN=CG2663 PE=4 SV=2	9.254	9.508	9.266	9.486	8.617	8.446	8.561	8.654	8.794	8.88	0.678772	-0.559	0.022
1788	Nervana 3, isoform E OS=Drosophila melanogaster GN=nrv3 PE=1 SV=1	9.435	9.324	9.172	9.117	9.45	9.357	9.379	9.42	9.326	9.479	1.06659	0.093	0.376
1789	GH11935p OS=Drosophila melanogaster GN=Ostgamma PE=1 SV=1	9.267	9.27	9.257	9.139	9.036	9.479	9.552	9.437	9.332	9.278	1.16635	0.222	0.037
1790	Tubulin-binding cofactor B OS=Drosophila melanogaster GN=TBCB PE=1 SV=1	9.217	9.162	9.124	9.155	9.169	9.214	9.295	9.156	9.056	9.045	0.99103	-0.013	0.893
1791	Spaghetti-squash activator, isoform C OS=Drosophila melanogaster GN=sqa PE=4 SV=2	8.822	8.701	8.774	8.772	8.426	8.405	8.275	8.426	8.346	8.674	0.827597	-0.273	0.047
1792	Lethal (2) 37Bb OS=Drosophila melanogaster GN=l(2)37Bb PE=1 SV=1	8.961	9.159	9.023	9.15	9.205	8.184	8.028	8.039	8.199	8.299	0.517632	-0.95	0
1793	RE01104p OS=Drosophila melanogaster GN=Rpt3R PE=2 SV=2	9.098	9.06	8.943	9.256	9.464	8.589	8.723	9.203	9.495	9.234	0.922742	-0.116	0.642
1794	Actin-related protein 2/3 complex subunit 2 OS=Drosophila melanogaster GN=Arpc2 PE=2 SV=2	9.012	8.958	8.969	8.926	9.112	9.03	9.052	8.963	9.094	9.121	1.03958	0.056	0.467
1795	CG9394, isoform A OS=Drosophila melanogaster GN=CG9394 PE=1 SV=1	9.275	9.25	9.197	9.088	9.441	9.161	9.285	9.28	9.084	9.301	0.980779	-0.028	0.806
1796	Uncharacterized protein, isoform M OS=Drosophila melanogaster GN=BcDNA:RE55923 PE=1 SV=1	7.767	8.249	7.946	7.841	7.799	9.011	8.876	9.158	8.744	9.033	2.06194	1.044	0
1797	Disabled, isoform F OS=Drosophila melanogaster GN=Dab PE=4 SV=2	6.253	6.263	6.169	6.165	6.349	5.899	5.9	6.24	5.934	6.183	0.865137	-0.209	0.076
1798	CG5958 OS=Drosophila melanogaster GN=Dmel\CG5958 PE=1 SV=1	10.319	10.104	10.047	10.119	10.261	9.807	9.887	9.634	10.083	9.779	0.794434	-0.332	0.015
1799	CG8768 OS=Drosophila melanogaster GN=CG8768 PE=1 SV=1	8.591	7.408	7.762	8.355	8.668	8.133	8.01	8.749	9.132	9.094	1.38223	0.467	0.261
1800	Uncharacterized protein OS=Drosophila melanogaster GN=CG15531 PE=3 SV=1	8.386	8.562	8.41	8.497	8.094	8.687	8.704	8.738	8.679	8.652	1.23285	0.302	0.017
1801	GEO09626p1 OS=Drosophila melanogaster GN=ND-MLRQ PE=1 SV=1	10.767	10.588	10.374	10.544	10.879	9.143	9.151	9.411	9.438	9.541	0.407819	-1.294	0
1802	Anamorsin homolog OS=Drosophila melanogaster GN=CIAPIN1 PE=2 SV=1	8.657	8.635	8.736	8.681	8.676	8.678	8.581	8.531	8.552	8.414	0.916369	-0.126	0.118
1803	CG6126 OS=Drosophila melanogaster GN=CG6126 PE=1 SV=1	9.085	9.168	9.218	9.205	9.208	9.465	9.528	9.357	9.393	9.468	1.20247	0.266	0.003
1804	CG6330, isoform A OS=Drosophila melanogaster GN=CG6330 PE=1 SV=2	9.356	9.377	9.378	9.36	9.271	9.332	9.372	9.39	9.481	9.361	1.0274	0.039	0.584
1805	CG2064 OS=Drosophila melanogaster GN=CG2064 PE=1 SV=1	8.59	8.355	8.621	8.385	8.369	6.932	7.158	6.911	6.692	6.607	0.328964	-1.604	0
1806	Ubiquinone biosynthesis protein COQ9, mitochondrial OS=Drosophila melanogaster GN=Coq9 PE=2 SV=1	9.636	9.6	9.649	9.6	9.668	9.967	9.857	10.009	9.646	9.809	1.1704	0.227	0.03
1807	LD41433p OS=Drosophila melanogaster GN=eIF2Bepsilon PE=1 SV=1	8.558	8.612	8.55	8.617	8.596	8.925	8.76	8.596	8.832	8.669	1.12506	0.17	0.073
1808	Igloo, isoform A OS=Drosophila melanogaster GN=igl PE=1 SV=1	9.131	9.146	8.946	9.019	9.147	8.944	9.015	8.972	8.951	8.978	0.929161	-0.106	0.169
1809	LD03515p OS=Drosophila melanogaster GN=Kcmf1 PE=1 SV=1	7.255	7.012	7.146	7.131	7.058	6.684	6.855	6.868	6.745	6.725	0.787308	-0.345	0.002
1810	Eukaryotic translation initiation factor 3 subunit F-1 OS=Drosophila melanogaster GN=eIF3-S5-1 PE=2 SV=1	8.661	8.464	8.494	8.726	8.894	8.453	8.543	8.6	8.944	8.976	1.03958	0.056	0.764
1811	Sulfhydryl oxidase OS=Drosophila melanogaster GN=CG17843 PE=2 SV=1	8.962	9.012	8.733	8.693	9.455	8.376	9.068	8.908	8.543	8.95	0.869345	-0.202	0.393
1812	Nedd8-activating enzyme E1 regulatory subunit OS=Drosophila melanogaster GN=APP-BP1 PE=1 SV=1	8.328	8.361	8.201	8.339	8.272	8.449	8.258	8.314	8.305	8.265	1.01255	0.018	0.838
1813	RE46718p OS=Drosophila melanogaster GN=veli PE=1 SV=1	9.19	9.228	9.115	9.147	9.278	9.032	9.133	9.18	8.933	8.986	0.908148	-0.139	0.114
1814	Uncharacterized protein, isoform A OS=Drosophila melanogaster GN=CG11073 PE=1 SV=2	8.505	8.066	8.412	8.251	8.118	8.719	8.733	8.704	8.558	8.535	1.30044	0.379	0.009
1815	LP10852p OS=Drosophila melanogaster GN=mRpS18B PE=1 SV=1	8.681	8.712	8.696	8.833	8.48	7.903	7.673	7.764	8.174	7.902	0.575545	-0.797	0
1816	Ribose-5-phosphate isomerase, isoform B OS=Drosophila melanogaster GN=Rpi PE=1 SV=3	10.019	9.967	9.837	10.147	10.077	9.604	9.919	9.684	9.901	9.767	0.849685	-0.235	0.047
1817	Protein PTCD3 homolog, mitochondrial OS=Drosophila melanogaster GN=CG4679 PE=2 SV=1	9.996	9.932	9.985	10.131	9.806	9.453	9.187	9.511	9.897	9.636	0.74072	-0.433	0.017
1818	40S ribosomal protein S15Ab OS=Drosophila melanogaster GN=RpS15Ab PE=2 SV=3	6.675	6.852	6.901	6.851	6.652	7.043	6.955	6.894	6.717	6.66	1.04826	0.068	0.589
1819	Probable aminoacyl tRNA synthase complex-interacting multifunctional protein 2 OS=Drosophila melanogaster GN=AIMP2 PE=3 SV=1	4.684	4.593	4.438	4.604	4.178	4.844	4.576	4.77	4.484	4.842	1.15189	0.204	0.178
1820	Probable cytosolic Fe-S cluster assembly factor CG17683 OS=Drosophila melanogaster GN=CG17683 PE=2 SV=1	8.966	8.939	8.866	8.852	8.933	8.922	8.98	8.909	8.888	8.932	1.01045	0.015	0.836
1821	CG7857 OS=Drosophila melanogaster GN=Q9VUN9 PE=1 SV=1	9.065	9.051	9.2	9.185	8.974	9.145	8.904	8.886	9.058	8.895	0.922103	-0.117	0.24
1822	AaRS-interacting multifunctional protein 2, isoform B OS=Drosophila melanogaster GN=AIMP2 PE=1 SV=3	2.831	3.069	3.356	3.811	3.47	3.434	3.375	2.957	2.458	2.552	0.783497	-0.352	0.275
1823	Rudhira, isoform C OS=Drosophila melanogaster GN=rudhira PE=4 SV=3	7.166	7.421	7.244	7.332	6.921	7.736	7.585	7.345	7.473	7.409	1.22519	0.293	0.052
1824	CTL-like protein 1 OS=Drosophila melanogaster GN=CG1311 PE=2 SV=1	5.911	5.962	5.835	5.623	5.821	6.022	5.968	6.095	5.988	6.165	1.16231	0.217	0.041
1825	AT06668p OS=Drosophila melanogaster GN=Rpt4R PE=2 SV=1	8.105	8.07	8.143	8.27	8.014	8.245	7.84	8.121	8.143	7.928	0.955945	-0.065	0.599
1826	GH14147p OS=Drosophila melanogaster GN=hoe1 PE=1 SV=1	8.464	8.486	8.425	8.442	8.599	8.223	8.376	8.314	8.163	8.31	0.866938	-0.206	0.022
1827	CG7860, isoform B OS=Drosophila melanogaster GN=CG7860 PE=1 SV=1	8.044	8.251	8.247	8.299	7.923	8.965	8.853	8.647	8.923	8.636	1.57135	0.652	0
1828	CG8531 OS=Drosophila melanogaster GN=CG8531 PE=1 SV=1	8.619	8.68	8.639	8.621	8.603	8.757	8.664	8.743	8.717	8.709	1.06069	0.085	0.171
1829	Uncharacterized protein, isoform C OS=Drosophila melanogaster GN=CG11857 PE=1 SV=1	8.103	8.187	8.101	8.19	8.294	7.867	8.14	8.04	8.173	8.161	0.93368	-0.099	0.319
1830	CG2982, isoform B OS=Drosophila melanogaster GN=CG2982 PE=1 SV=1	8.51	8.593	8.576	8.648	8.535	8.522	8.338	8.292	8.225	7.953	0.808881	-0.306	0.028
1831	Tenzing norgay, isoform C OS=Drosophila melanogaster GN=tzn PE=1 SV=1	10.078	10.107	10.157	10.188	10.08	9.918	10.151	10.01	9.962	9.91	0.912565	-0.132	0.113
1832	Sc2 OS=Drosophila melanogaster GN=Sc2 PE=1 SV=1	9.878	9.786	9.578	9.615	9.711	9.481	9.539	9.555	9.748	9.73	0.931095	-0.103	0.346
1833	CG6071 OS=Drosophila melanogaster GN=Dmel\CG6071 PE=4 SV=2	9.2	9.365	8.943	9.047	9.666	9.063	9.606	9.432	9.105	9.459	1.06363	0.089	0.687
1834	Cytoplasmic dynein 1 intermediate chain OS=Drosophila melanogaster GN=sw PE=1 SV=3	9.263	9.116	9.032	9.261	9.505	9.091	9.452	9.53	9.647	9.796	1.20414	0.268	0.143
1835	GH11824p OS=Drosophila melanogaster GN=POLDIP2 PE=1 SV=1	9.464	9.428	9.463	9.498	9.286	8.745	8.453	8.636	8.539	8.576	0.559419	-0.838	0
1836	Proteasome subunit alpha type-4 OS=Drosophila melanogaster GN=Prosalpha3 PE=1 SV=2	8.933	9.043	8.845	8.98	8.764	9.176	9.068	9.102	9.229	9.08	1.16312	0.218	0.026
1837	Cysteine and histidine-rich domain-containing protein OS=Drosophila melanogaster GN=CHORD PE=1 SV=1	8.598	8.755	8.613	8.814	8.889	8.88	8.762	8.862	9.03	8.822	1.10038	0.138	0.186
1838	LD22649p OS=Drosophila melanogaster GN=red PE=1 SV=1	7.688	7.793	7.649	7.671	7.909	7.269	7.457	7.513	7.356	7.428	0.791686	-0.337	0.004
1839	Activity-regulated cytoskeleton associated protein 1 OS=Drosophila melanogaster GN=Arc1 PE=1 SV=1	8.882	7.962	8.448	7.936	8.361	9.082	9.885	9.407	9.391	9.703	2.25793	1.175	0.001
1840	CG3793, isoform B OS=Drosophila melanogaster GN=BG:DS09217.4 PE=1 SV=1	8.985	9.003	8.889	8.901	9.006	8.805	8.633	8.73	8.925	8.805	0.883928	-0.178	0.051
1841	Neurocalcin homolog OS=Drosophila melanogaster GN=Nca PE=1 SV=2	9.631	9.509	9.44	9.439	9.587	9.304	9.342	9.398	9.405	9.314	0.890076	-0.168	0.041
1842	Bifocal, isoform F OS=Drosophila melanogaster GN=bif PE=1 SV=1	7.631	7.403	7.57	7.452	7.537	7.48	7.597	7.609	7.228	7.571	0.984866	-0.022	0.866
1843	NF-kappa-B inhibitor cactus OS=Drosophila melanogaster GN=cact PE=1 SV=2	8.076	8.022	7.941	8.226	8.139	8.21	8.356	8.126	8.117	7.93	1.04754	0.067	0.578
1844	DEAD-box helicase Dbp80 OS=Drosophila melanogaster GN=Dbp80 PE=1 SV=1	6.855	6.604	6.719	7.007	6.932	6.569	6.539	6.063	6.223	6.153	0.700278	-0.514	0.007
1845	Uncharacterized protein, isoform A OS=Drosophila melanogaster GN=Dmel\CG17127 PE=1 SV=1	8.711	8.761	8.669	8.857	8.791	8.829	9.083	9.397	9.164	9.622	1.3765	0.461	0.019
1846	Uncharacterized protein OS=Drosophila melanogaster GN=Dmel\CG32985 PE=4 SV=1	9.236	9.532	9.403	9.424	9.142	9.243	9.736	9.557	9.418	9.547	1.11188	0.153	0.282
1847	CG4729, isoform E OS=Drosophila melanogaster GN=Dmel\CG4729 PE=1 SV=1	9.275	9.261	9.045	9.191	9.585	9.132	9.23	9.25	9.418	9.581	1.03598	0.051	0.76
1848	Stardust, isoform G OS=Drosophila melanogaster GN=sdt PE=1 SV=1	4.441	3.678	3.253	4.237	4.225	2.991	3.658	3.645	4.036	4.122	0.825305	-0.277	0.452
1849	CG9360 OS=Drosophila melanogaster GN=CG9360 PE=1 SV=1	8.381	8.34	8.165	8.416	8.517	8.861	8.982	8.93	9.165	9.257	1.5966	0.675	0
1850	Drab11 OS=Drosophila melanogaster GN=Rab11 PE=1 SV=1	9.362	9.333	9.333	9.24	9.244	9.398	9.368	9.389	9.41	9.344	1.05702	0.08	0.229
1851	CG9911, isoform A OS=Drosophila melanogaster GN=CG9911 PE=1 SV=1	9.56	9.596	9.493	9.477	9.487	9.641	9.636	9.672	9.697	9.621	1.09505	0.131	0.056
1852	Charged multivesicular body protein 5 OS=Drosophila melanogaster GN=Vps60 PE=1 SV=2	9.14	9.005	9.09	9.153	9.317	9.025	9.224	8.987	8.878	9.058	0.928517	-0.107	0.323
1853	Adaptor protein complex 1, mu subunit OS=Drosophila melanogaster GN=AP-1mu PE=1 SV=1	8.731	8.694	8.736	8.789	8.549	8.972	8.955	8.914	8.962	8.794	1.16473	0.22	0.019
1854	Probable cytochrome P450 12b2, mitochondrial OS=Drosophila melanogaster GN=Cyp12b2 PE=2 SV=2	9.049	9.137	8.879	9.021	9.299	8.53	8.496	8.608	8.304	8.495	0.664343	-0.59	0
1855	Sideroflexin OS=Drosophila melanogaster GN=Sfxn2 PE=1 SV=2	9.341	9.285	9.242	9.129	9.231	9.293	9.215	9.194	9.055	9.124	0.953299	-0.069	0.426
1856	Phospholipid-transporting ATPase OS=Drosophila melanogaster GN=P4-ATPase PE=1 SV=2	8.486	8.472	8.498	8.413	8.267	8.677	8.505	8.501	8.498	8.472	1.07475	0.104	0.244
1857	CG8771, isoform C OS=Drosophila melanogaster GN=CG8771 PE=1 SV=1	7.65	7.689	7.667	7.596	7.478	7.517	7.569	7.695	7.673	7.655	1.00417	0.006	0.958
1858	CG2921 OS=Drosophila melanogaster GN=CG2921 PE=2 SV=1	8.432	8.413	8.454	8.46	8.445	8.523	8.231	8.469	8.599	8.373	0.998615	-0.002	0.989
1859	ATP-dependent Clp protease proteolytic subunit OS=Drosophila melanogaster GN=Dmel\CG5045 PE=1 SV=1	9.584	9.42	9.468	9.487	9.629	9.508	9.377	9.646	9.651	9.613	1.02883	0.041	0.688
1860	26S proteasome regulatory complex subunit p39A OS=Drosophila melanogaster GN=Rpn9 PE=1 SV=1	10.112	9.916	9.958	10.043	10.147	9.466	9.583	9.6	10.006	9.872	0.795536	-0.33	0.032
1861	ACP53C14B OS=Drosophila melanogaster GN=Acp53C14b PE=1 SV=1	10.144	10.044	9.552	9.797	11.113	9.031	9.72	9.802	9.416	9.95	0.684916	-0.546	0.154
1862	SD09912p OS=Drosophila melanogaster GN=CG12428 PE=1 SV=1	9.511	9.532	9.304	9.307	9.297	9.198	9.083	9.065	9.21	9.201	0.847332	-0.239	0.021
1863	Exportin-2 OS=Drosophila melanogaster GN=Cse1 PE=2 SV=2	9.228	9.1	9.044	9.136	9.175	8.878	8.804	8.959	9.161	9.01	0.886382	-0.174	0.09
1864	Succinate dehydrogenase [ubiquinone] flavoprotein subunit, mitochondrial OS=Drosophila melanogaster GN=SdhAL PE=2 SV=1	9.064	8.979	9.217	9.153	8.979	8.413	8.037	8.289	8.64	8.145	0.584794	-0.774	0
1865	GH08677p OS=Drosophila melanogaster GN=nmd PE=2 SV=1	9.321	9.285	9.204	9.293	9.17	9.416	9.253	9.154	9.361	9.374	1.0403	0.057	0.528
1866	Lethal (2) giant discs 1, isoform B OS=Drosophila melanogaster GN=l(2)gd1 PE=4 SV=1	9.412	9.373	9.378	9.286	9.292	9.445	9.505	9.318	9.216	9.244	0.997923	-0.003	0.983
1867	Tyrosine-protein phosphatase non-receptor type 61F OS=Drosophila melanogaster GN=Ptp61F PE=1 SV=1	8.958	8.952	8.91	8.881	8.804	9.028	8.958	8.895	8.916	8.947	1.03383	0.048	0.513
1868	GH23568p OS=Drosophila melanogaster GN=parvin PE=1 SV=2	9.187	8.972	8.903	9.059	9.556	8.647	8.894	8.989	9.6	9.735	1.02598	0.037	0.913
1869	GH11385p OS=Drosophila melanogaster GN=Irc PE=1 SV=2	8.464	7.67	8.918	7.686	7.882	9.049	9.132	8.959	9.042	9.005	1.88296	0.913	0.009
1870	CG6441, isoform A OS=Drosophila melanogaster GN=anon-WO0140519.45 PE=4 SV=3	7.853	7.906	8.31	8.2	8.068	8.237	7.996	8.15	8.285	8.008	1.04826	0.068	0.638
1871	Tequila, isoform G OS=Drosophila melanogaster GN=teq PE=1 SV=4	7.256	7.058	8.096	7.361	7.136	7.647	7.975	7.693	7.462	7.682	1.23971	0.31	0.219
1872	Cuticular protein 100A OS=Drosophila melanogaster GN=Cpr100A PE=1 SV=1	8.93	8.72	8.962	9.216	8.408	8.808	8.4	8.73	9.185	8.915	0.972655	-0.04	0.881
1873	Caffeine, calcium, zinc sensitivity 1 OS=Drosophila melanogaster GN=Ccz1 PE=2 SV=3	7.826	7.94	7.899	8.037	7.86	7.929	8.051	7.835	7.682	7.862	0.971981	-0.041	0.709
1874	Protein henna OS=Drosophila melanogaster GN=Hn PE=2 SV=3	9.552	9.368	9.438	9.392	9.643	9.3	9.661	9.374	10.154	10.073	1.17609	0.234	0.304
1875	40S ribosomal protein SA OS=Drosophila melanogaster GN=sta PE=1 SV=2	8.507	8.422	8.336	8.674	8.917	8.173	8.559	8.376	8.788	8.617	0.953299	-0.069	0.732
1876	Mitogen-activated protein kinase OS=Drosophila melanogaster GN=bsk PE=1 SV=1	8.778	8.688	8.765	8.746	8.797	8.549	8.561	8.535	8.686	8.612	0.89131	-0.166	0.028
1877	Klaroid, isoform D OS=Drosophila melanogaster GN=koi PE=1 SV=1	9.088	8.964	9.007	8.918	8.756	9.068	8.896	8.949	8.935	8.935	1.00696	0.01	0.929
1878	Malate dehydrogenase OS=Drosophila melanogaster GN=Dmel\CG10749 PE=2 SV=1	9.254	9.309	9.415	9.447	9.236	8.828	8.809	8.926	8.765	8.634	0.687771	-0.54	0
1879	Patj homolog OS=Drosophila melanogaster GN=Patj PE=1 SV=2	8.544	8.663	8.675	8.584	8.597	8.418	8.497	8.401	8.159	8.269	0.832776	-0.264	0.015
1880	Protein kinase, cAMP-dependent, regulatory subunit type 1, isoform O OS=Drosophila melanogaster GN=Pka-R1 PE=1 SV=2	7.304	7.344	7.172	7.376	7.527	7.365	7.4	7.52	7.153	7.361	1.01045	0.015	0.908
1881	Fatty acyl-CoA reductase OS=Drosophila melanogaster GN=CG17560 PE=3 SV=2	9.927	10.072	9.719	9.726	9.43	10.406	10.49	10.462	10.544	10.517	1.63467	0.709	0
1882	GH28523p OS=Drosophila melanogaster GN=PhKgamma PE=2 SV=1	9.169	9.15	8.966	9.062	9.329	7.905	7.819	8.017	8.169	8.311	0.469436	-1.091	0
1883	CG7997, isoform A OS=Drosophila melanogaster GN=CG7997 PE=1 SV=1	8.683	8.509	9.184	8.672	8.742	8.61	8.763	8.529	8.904	8.8	0.97468	-0.037	0.847
1884	Dynein assembly factor 5, axonemal OS=Drosophila melanogaster GN=HEATR2 PE=2 SV=1	9.093	9.062	9.135	9.064	9.288	8.755	8.45	8.92	9.116	8.838	0.805524	-0.312	0.05
1885	Cuticular protein 49Aa OS=Drosophila melanogaster GN=Cpr49Aa PE=1 SV=1	8.164	8.381	8.359	8.986	8.321	8.05	8.355	8.461	8.207	8.437	0.907519	-0.14	0.496
1886	Trithorax group protein osa OS=Drosophila melanogaster GN=osa PE=1 SV=1	8.156	8.023	8.121	8.152	8.018	8.214	8.254	8.05	8	7.956	1.00069	0.001	0.994
1887	RE08669p OS=Drosophila melanogaster GN=RpL6 PE=1 SV=1	9.181	9.314	9.346	9.379	9.149	9.521	9.517	9.312	9.543	9.218	1.1088	0.149	0.187
1888	UDP-glucuronosyltransferase OS=Drosophila melanogaster GN=Ugt35b PE=2 SV=1	9.945	9.977	9.627	9.924	10.161	9.361	9.58	9.683	10.043	10.088	0.885154	-0.176	0.393
1889	Thioredoxin reductase 2, mitochondrial OS=Drosophila melanogaster GN=Trxr-2 PE=2 SV=1	8.357	8.314	8.638	8.676	8.274	7.905	7.523	7.954	8.194	7.799	0.670356	-0.577	0.006
1890	Acyl-coenzyme A oxidase OS=Drosophila melanogaster GN=CG4586 PE=1 SV=1	8.691	8.619	8.89	8.891	7.773	9.525	8.733	8.611	9.396	8.531	1.30677	0.386	0.282
1891	Protein elav OS=Drosophila melanogaster GN=elav PE=2 SV=1	8.799	8.851	8.762	8.849	8.706	8.924	8.846	8.851	8.927	8.737	1.04536	0.064	0.42
1892	GH15225p OS=Drosophila melanogaster GN=Ulp1 PE=1 SV=1	7.636	7.801	7.792	7.731	7.788	7.82	7.778	7.742	7.481	7.541	0.94737	-0.078	0.473
1893	Inhibitor-2, isoform B OS=Drosophila melanogaster GN=I-2 PE=1 SV=1	8.264	8.143	8.054	7.982	8.597	8.299	8.44	8.327	8.184	8.125	1.04754	0.067	0.688
1894	40S ribosomal protein S16 OS=Drosophila melanogaster GN=RpS16 PE=1 SV=1	9.784	9.774	9.755	9.94	9.953	9.926	9.989	9.839	10.161	10.015	1.10573	0.145	0.152
1895	CG8814 OS=Drosophila melanogaster GN=Dmel\CG8814 PE=2 SV=1	9.222	9.206	9.065	9.102	9.147	9.104	9.074	8.96	8.924	8.983	0.908148	-0.139	0.085
1896	LD44221p OS=Drosophila melanogaster GN=CG11005 PE=1 SV=1	7.955	7.947	7.995	8.118	8.2	7.813	7.975	7.655	7.804	7.822	0.853226	-0.229	0.037
1897	Pre-mRNA-splicing factor CWC22 homolog OS=Drosophila melanogaster GN=ncm PE=1 SV=3	8.848	8.947	8.748	8.81	8.858	9.064	8.959	9.049	8.885	9.02	1.11188	0.153	0.064
1898	GH11193p OS=Drosophila melanogaster GN=Rab18 PE=1 SV=1	8.517	8.403	8.168	8.333	8.485	8.216	8.184	8.309	8.593	8.553	0.993092	-0.01	0.954
1899	Adapter molecule Crk OS=Drosophila melanogaster GN=Crk PE=1 SV=1	8.319	8.359	8.175	8.276	8.165	8.088	9.496	8.68	8.042	8.844	1.29325	0.371	0.264
1900	CG1311, isoform B OS=Drosophila melanogaster GN=Ctl1 PE=3 SV=1	5.303	5.472	5.408	5.87	5.364	5.917	5.842	5.383	5.748	5.283	1.11034	0.151	0.464
1901	Cadherin-N, isoform L OS=Drosophila melanogaster GN=CadN PE=1 SV=1	7.684	7.751	7.623	7.752	7.572	7.968	7.792	7.873	7.843	7.839	1.13761	0.186	0.029
1902	AT22194p OS=Drosophila melanogaster GN=CG5217 PE=2 SV=1	9.276	9.371	9.655	9.653	9.264	9.117	8.911	9.065	9.28	8.697	0.742262	-0.43	0.021
1903	GH26960p OS=Drosophila melanogaster GN=Porin2 PE=2 SV=1	9.329	9.358	9.055	9.198	9.562	8.427	8.388	8.758	8.982	8.618	0.630252	-0.666	0.003
1904	Serine/threonine-protein phosphatase alpha-2 isoform OS=Drosophila melanogaster GN=Pp1-87B PE=1 SV=1	8.128	7.859	7.377	7.977	7.921	7.183	7.207	7.608	8.533	8.286	0.940174	-0.089	0.83
1905	Probable hydroxyacid-oxoacid transhydrogenase, mitochondrial OS=Drosophila melanogaster GN=T3dh PE=2 SV=1	8.102	7.944	7.956	8.208	8.24	8.479	8.297	8.252	8.625	8.8	1.32042	0.401	0.019
1906	CG6733 OS=Drosophila melanogaster GN=CG6733 PE=2 SV=1	8.078	7.916	8.281	8.376	8.529	8.088	8.457	8.494	8.22	8.714	1.11574	0.158	0.419
1907	Dead box protein 80, isoform E OS=Drosophila melanogaster GN=Dbp80 PE=1 SV=1	7.895	7.802	7.88	7.896	7.655	8.296	8.296	8.014	8.067	7.94	1.22859	0.297	0.023
1908	GTP cyclohydrolase 1 OS=Drosophila melanogaster GN=Pu PE=1 SV=3	9.638	9.627	9.649	9.673	9.312	9.71	9.346	9.554	10.022	9.653	1.05482	0.077	0.657
1909	LP07287p OS=Drosophila melanogaster GN=CG14894 PE=1 SV=2	8.762	8.681	8.801	8.7	8.724	8.819	8.672	8.76	8.809	8.656	1.00626	0.009	0.913
1910	60S ribosomal protein L19 OS=Drosophila melanogaster GN=RpL19 PE=1 SV=2	9.935	9.79	9.741	10.01	9.996	9.704	9.858	9.859	10.383	10.128	1.06585	0.092	0.603
1912	GH07821p OS=Drosophila melanogaster GN=mRpS22 PE=1 SV=1	9.46	9.405	9.491	9.634	9.487	9.05	8.921	8.95	9.43	9.178	0.76313	-0.39	0.011
1913	Accessory gland protein 32CD, isoform B OS=Drosophila melanogaster GN=Acp32CD PE=4 SV=1	8.176	8.544	8.273	8.216	8.512	8.616	8.837	8.841	8.372	8.665	1.25006	0.322	0.043
1914	Protein Skeletor, isoforms D/E OS=Drosophila melanogaster GN=Skeletor PE=1 SV=3	8.675	8.379	8.835	8.851	8.043	9.756	8.75	8.919	9.736	8.955	1.58667	0.666	0.051
1915	FI04779p OS=Drosophila melanogaster GN=HBS1 PE=1 SV=2	8.705	8.679	8.715	8.816	8.757	9.04	8.931	8.875	9.174	9.04	1.21251	0.278	0.008
1916	RE58324p OS=Drosophila melanogaster GN=anon-WO02059370.23 PE=2 SV=3	8.974	8.868	8.758	8.76	9.2	8.398	8.713	8.652	8.907	8.927	0.874785	-0.193	0.239
1917	GH12641p OS=Drosophila melanogaster GN=Gk1 PE=1 SV=1	9.346	9.411	9.378	9.452	9.442	9.317	9.554	9.354	9.323	9.384	0.986917	-0.019	0.83
1918	LP11544p OS=Drosophila melanogaster GN=Mal-A5 PE=1 SV=1	8.692	8.485	8.774	8.578	8.61	9.108	8.701	8.818	9.652	8.919	1.33053	0.412	0.067
1919	Inositol-1-monophosphatase OS=Drosophila melanogaster GN=IMP PE=1 SV=1	9.237	9.269	9.176	9.267	9.32	9.019	9.108	9.066	9.155	9.136	0.896888	-0.157	0.036
1920	Cullin 4, isoform A OS=Drosophila melanogaster GN=Cul4 PE=1 SV=1	8.82	8.8	8.809	8.817	8.796	8.783	8.839	8.938	9.064	8.897	1.06881	0.096	0.24
1921	Uncharacterized protein OS=Drosophila melanogaster GN=CG13155 PE=4 SV=1	9.045	9.132	8.971	9.051	8.721	9.2	9.188	9.207	9.005	9.128	1.11884	0.162	0.152
1922	Probable cytochrome P450 6a23 OS=Drosophila melanogaster GN=Cyp6a23 PE=2 SV=2	9.26	9.082	9.182	9.055	9.238	8.142	8.517	8.258	8.098	8.236	0.53108	-0.913	0
1923	CG7656, isoform A OS=Drosophila melanogaster GN=Dmel\CG7656 PE=1 SV=1	8.121	8.304	8.315	8.393	8.183	8.681	8.497	8.494	8.466	8.385	1.18181	0.241	0.027
1924	TFIIF-interacting CTD phosphatase, isoform A OS=Drosophila melanogaster GN=Fcp1 PE=1 SV=1	7.966	7.927	7.963	7.836	7.886	8.44	8.358	8.195	8.142	8.108	1.25963	0.333	0.005
1925	COP9 signalosome complex subunit 7 OS=Drosophila melanogaster GN=CSN7 PE=1 SV=2	7.883	7.882	7.858	7.851	7.885	7.81	7.751	7.677	7.761	7.514	0.889459	-0.169	0.056
1926	LD28127p OS=Drosophila melanogaster GN=PP2C PE=1 SV=1	5.795	5.733	5.608	5.752	5.554	6.748	6.778	6.815	6.678	6.715	2.08349	1.059	0
1927	Transcription elongation factor SPT5 OS=Drosophila melanogaster GN=Spt5 PE=1 SV=1	8.406	8.561	8.73	8.569	8.334	8.914	8.962	8.813	8.81	8.718	1.25093	0.323	0.012
1928	Quemao, isoform A OS=Drosophila melanogaster GN=qm PE=1 SV=1	8.606	8.682	8.594	8.695	8.482	8.619	8.471	8.525	8.727	8.642	0.989657	-0.015	0.886
1929	Heterochromatin protein 1 OS=Drosophila melanogaster GN=Su(var)205 PE=1 SV=2	8.587	8.535	8.597	8.541	8.438	8.785	8.812	8.828	8.554	8.519	1.11729	0.16	0.13
1930	IP14839p OS=Drosophila melanogaster GN=CG11876 PE=1 SV=1	6.626	6.491	6.35	6.565	6.311	5.891	5.933	5.869	5.966	6.039	0.693035	-0.529	0
1931	Larval serum protein 1 alpha chain OS=Drosophila melanogaster GN=Lsp1alpha PE=2 SV=3	7.397	5.431	10.575	8.765	4.43	8.95	8.407	7.904	10.372	7.963	2.63902	1.4	0.333
1932	LP01981p OS=Drosophila melanogaster GN=p24-2 PE=2 SV=1	7.693	7.601	7.717	7.704	7.641	7.514	7.558	7.599	8.047	7.78	1.0203	0.029	0.848
1933	Mitochondrial ribosomal protein L3 OS=Drosophila melanogaster GN=mRpL3 PE=1 SV=2	9.709	9.69	9.603	9.909	9.594	9.024	8.845	9.165	9.651	9.411	0.715984	-0.482	0.023
1934	60S ribosomal protein L13a OS=Drosophila melanogaster GN=RpL13A PE=1 SV=1	9.561	9.521	9.535	9.725	9.749	9.561	9.547	9.441	9.764	9.416	0.951318	-0.072	0.523
1935	DnaJ homolog shv OS=Drosophila melanogaster GN=shv PE=1 SV=1	8.477	8.487	8.513	8.49	8.483	8.47	8.665	8.664	8.458	8.502	1.04391	0.062	0.449
1936	CG4603, isoform B OS=Drosophila melanogaster GN=Q9VRJ9 PE=1 SV=1	8.558	8.567	8.401	8.504	8.532	8.383	8.227	8.266	8.457	8.317	0.88148	-0.182	0.04
1937	CG9368, isoform A OS=Drosophila melanogaster GN=BcDNA:RH51268 PE=2 SV=1	8.508	8.519	8.453	8.394	8.58	8.088	8.005	8.147	8.13	8.233	0.773782	-0.37	0.001
1938	Drongo, isoform F OS=Drosophila melanogaster GN=drongo PE=4 SV=1	8.584	8.685	8.693	8.644	8.378	8.74	8.773	8.62	8.588	8.465	1.02811	0.04	0.738
1940	60S ribosomal protein L14 OS=Drosophila melanogaster GN=RpL14 PE=1 SV=1	9.522	9.712	9.751	9.89	9.509	10.346	10.124	10.234	10.633	10.126	1.53262	0.616	0.002
1941	Hydroxymethylglutaryl-CoA synthase OS=Drosophila melanogaster GN=Hmgs PE=1 SV=1	8.35	8.321	8.243	8.221	8.435	8.831	8.859	8.871	8.914	8.97	1.48968	0.575	0
1942	BcDNA.GH02976 OS=Drosophila melanogaster GN=obst-B PE=1 SV=1	8.195	8.054	8.513	8.696	7.473	9.327	8.203	8.382	9.268	8.473	1.45902	0.545	0.161
1943	Uncharacterized protein, isoform A OS=Drosophila melanogaster GN=CG13164 PE=4 SV=1	9.359	9.308	9.996	9.938	9.332	9.233	8.918	9.122	9.281	8.896	0.70907	-0.496	0.033
1944	GH06271p OS=Drosophila melanogaster GN=Mms19 PE=1 SV=1	8.972	8.827	8.784	8.824	8.897	8.656	8.601	8.754	9.087	8.843	0.950659	-0.073	0.572
1945	Protein kinase N, isoform G OS=Drosophila melanogaster GN=Pkn PE=1 SV=1	8.948	8.943	8.874	8.895	8.909	9.117	9.075	9.066	8.886	9.029	1.08749	0.121	0.119
1946	Cytochrome b5-related protein OS=Drosophila melanogaster GN=Cyt-b5-r PE=2 SV=2	8.85	8.773	8.801	8.922	9.043	8.617	8.815	8.467	8.618	8.767	0.857971	-0.221	0.055
1947	CG9044, isoform C OS=Drosophila melanogaster GN=CT25972 PE=1 SV=1	7.592	7.556	7.531	7.608	7.818	7.412	7.604	7.578	7.647	7.67	0.973329	-0.039	0.721
1948	Ubr3 ubiquitin ligase, isoform B OS=Drosophila melanogaster GN=Ubr3 PE=1 SV=1	8.316	8.394	8.405	8.342	8.266	8.258	8.237	8.208	8.029	8.022	0.874179	-0.194	0.042
1949	Bacchus OS=Drosophila melanogaster GN=Bacc PE=2 SV=1	10.414	10.478	10.466	10.487	10.378	10.482	10.769	10.526	10.15	10.329	1.00417	0.006	0.972
1950	Acyl-CoA-binding protein homolog OS=Drosophila melanogaster GN=Dbi PE=2 SV=1	8.911	9.231	8.443	9.462	9.052	8.512	9.062	8.754	8.581	9.059	0.855002	-0.226	0.379
1951	Cdc42-interacting protein 4, isoform B OS=Drosophila melanogaster GN=Cip4 PE=4 SV=1	8.06	7.944	8.096	7.972	7.958	8.371	8.179	8.157	8.174	8.083	1.13839	0.187	0.046
1952	GEO08323p1 OS=Drosophila melanogaster GN=BcDNA:RH34376 PE=2 SV=3	8.342	8.122	8.312	8.34	8.433	8.098	8.287	8.107	8.262	8.368	0.942785	-0.085	0.422
1953	Calcium/calmodulin-dependent protein kinase I, isoform H OS=Drosophila melanogaster GN=CaMKI PE=1 SV=1	5.074	5.499	5.327	5.399	4.702	5.839	5.652	5.518	5.094	4.869	1.14393	0.194	0.499
1954	AT01345p OS=Drosophila melanogaster GN=mEFTu2 PE=1 SV=1	10.286	10.273	10.228	10.198	10.313	9.927	9.755	9.767	9.875	9.801	0.740207	-0.434	0
1955	RE21473p OS=Drosophila melanogaster GN=sdt PE=1 SV=2	4.303	5.609	4.812	5.174	4.935	5.638	6.028	5.756	5.015	5.221	1.47939	0.565	0.107
1956	CG2736 OS=Drosophila melanogaster GN=CG2736 PE=1 SV=1	8.59	8.634	8.56	8.513	8.557	9.187	9.446	9.513	9.44	9.526	1.80375	0.851	0
1957	Glutathione S transferase E13, isoform A OS=Drosophila melanogaster GN=GstE13 PE=1 SV=1	9.4	9.155	9.176	9.261	9.193	8.881	8.644	8.881	9.211	9.152	0.82188	-0.283	0.063
1958	GH11271p OS=Drosophila melanogaster GN=CG11961 PE=1 SV=1	8.348	8.473	8.222	8.152	8.362	9.053	9.016	8.97	9.008	9.005	1.62338	0.699	0
1959	Uroporphyrinogen decarboxylase OS=Drosophila melanogaster GN=Updo PE=3 SV=1	8.642	8.533	8.568	8.546	8.555	8.736	8.632	8.63	8.768	8.697	1.08975	0.124	0.084
1960	LD16031p OS=Drosophila melanogaster GN=TBCD PE=1 SV=1	8.556	8.424	8.486	8.439	8.426	8.418	8.198	8.309	8.536	8.38	0.934327	-0.098	0.297
1961	Histone PARylation factor 1-like OS=Drosophila melanogaster GN=CG1218 PE=1 SV=2	7.788	7.827	7.938	7.878	7.579	8.298	8.16	8.063	8.102	7.899	1.23285	0.302	0.023
1962	Nuclear pore complex protein Nup88 OS=Drosophila melanogaster GN=mbo PE=1 SV=2	8.053	8.099	8.047	7.963	8.068	8.134	8.103	8.068	8.001	8.084	1.02243	0.032	0.658
1963	GH16740p OS=Drosophila melanogaster GN=GstT4 PE=1 SV=1	9.318	9.34	9.194	9.297	9.459	9.204	9.518	9.22	9.294	9.284	0.987601	-0.018	0.881
1964	CG7903, isoform A OS=Drosophila melanogaster GN=CG7903 PE=4 SV=2	7.327	6.942	7.283	7.132	6.865	7.116	6.964	7.027	6.771	6.903	0.898755	-0.154	0.28
1965	Conserved oligomeric Golgi complex subunit 3 OS=Drosophila melanogaster GN=Cog3 PE=1 SV=1	7.537	7.588	7.588	7.617	7.631	7.186	7.29	7.165	7.472	7.29	0.805524	-0.312	0.004
1966	IP06473p OS=Drosophila melanogaster GN=Dmel\CG14130 PE=1 SV=2	7.49	7.46	7.324	7.229	7.571	7.465	7.518	7.722	7.621	7.593	1.12428	0.169	0.121
1967	Putative ATP-dependent RNA helicase me31b OS=Drosophila melanogaster GN=me31B PE=1 SV=3	10.042	10.106	10.063	9.982	9.896	10.114	9.964	10.123	10.283	10.091	1.06955	0.097	0.304
1968	Dorsal-related immunity factor, isoform C OS=Drosophila melanogaster GN=Dif PE=4 SV=1	8.126	8.153	8.221	8.079	8.191	8.316	8.377	8.276	8.217	8.258	1.09809	0.135	0.07
1969	Tyrosine-protein phosphatase 69D OS=Drosophila melanogaster GN=Ptp69D PE=1 SV=2	8.431	8.428	8.488	8.455	8.363	8.494	8.413	8.347	8.394	8.268	0.965936	-0.05	0.526
1970	Rhythmically expressed gene 2 protein OS=Drosophila melanogaster GN=Reg-2 PE=2 SV=1	8.887	8.805	8.723	8.856	8.965	9.018	9.187	8.986	9.292	9.284	1.23628	0.306	0.012
1971	Cytoplasmic linker protein 190, isoform Q OS=Drosophila melanogaster GN=CLIP-190 PE=1 SV=1	6.198	6.028	5.88	6.081	6.549	5.205	5.933	5.585	5.644	6.365	0.757333	-0.401	0.149
1972	Probable glutamine-dependent NAD(+) synthetase OS=Drosophila melanogaster GN=CG9940 PE=1 SV=1	7.836	7.914	7.9	8.011	8.067	7.795	7.858	7.529	7.525	7.707	0.833353	-0.263	0.029
1973	Protein kinase, cAMP-dependent, regulatory subunit type 1, isoform X OS=Drosophila melanogaster GN=Pka-R1 PE=1 SV=1	7.429	7.414	7.371	7.392	7.338	7.281	7.364	7.301	7.123	7.465	0.944747	-0.082	0.366
1974	CG8498, isoform A OS=Drosophila melanogaster GN=Dmel\CG8498 PE=1 SV=1	9.53	9.27	9.405	9.546	9.684	8.234	8.581	8.283	8.595	8.656	0.494143	-1.017	0
1975	AT10584p OS=Drosophila melanogaster GN=Mulk PE=1 SV=2	9.862	9.778	9.865	9.966	9.727	9.527	9.507	9.54	9.621	9.565	0.819037	-0.288	0.003
1976	Uncharacterized protein, isoform B OS=Drosophila melanogaster GN=CG32694 PE=4 SV=2	7.071	6.995	7.097	7.08	7.183	7.074	7.181	7.1	7.294	7.276	1.07177	0.1	0.248
1977	Heme oxygenase OS=Drosophila melanogaster GN=Ho PE=1 SV=1	10.314	10.312	10.295	10.282	10.21	10.414	10.28	10.283	10.208	10.193	0.99516	-0.007	0.941
1978	tRNA (guanine-N(7)-)-methyltransferase non-catalytic subunit wuho OS=Drosophila melanogaster GN=wuho PE=2 SV=1	8.868	8.887	8.762	8.768	8.848	9.246	9.167	9.157	9.185	9.196	1.28699	0.364	0
1979	CG6617 OS=Drosophila melanogaster GN=CG6617 PE=1 SV=1	8.634	8.572	8.596	8.619	8.556	8.609	8.494	8.404	8.531	8.336	0.91955	-0.121	0.148
1980	CG2807, isoform A OS=Drosophila melanogaster GN=Sf3b1 PE=1 SV=2	8.584	8.613	8.457	8.603	8.69	8.722	8.802	8.708	8.846	8.975	1.16554	0.221	0.028
1981	Probable cytochrome P450 6d2 OS=Drosophila melanogaster GN=Cyp6d2 PE=2 SV=1	8.168	7.78	8.014	7.962	7.839	8.738	8.682	8.586	8.599	8.703	1.63467	0.709	0
1982	FI23914p1 OS=Drosophila melanogaster GN=HIPP1 PE=1 SV=2	8.148	8.271	8.412	8.428	7.958	8.112	8.155	8.01	7.957	8.031	0.875998	-0.191	0.138
1983	Maltase A8 OS=Drosophila melanogaster GN=Mal-A8 PE=4 SV=1	7.632	7.769	7.869	7.915	8.316	8.079	8.83	8.306	8.309	8.427	1.40444	0.49	0.031
1984	Coatomer subunit epsilon OS=Drosophila melanogaster GN=epsilonCOP PE=1 SV=1	8.326	8.43	8.414	8.368	8.241	8.326	8.472	8.395	8.41	8.468	1.04102	0.058	0.458
1985	Ceramidase, isoform B OS=Drosophila melanogaster GN=CDase PE=1 SV=1	9.13	9.032	8.88	8.887	8.91	9.324	9.335	9.199	9.362	9.217	1.24747	0.319	0.004
1986	CG3662, isoform A OS=Drosophila melanogaster GN=Dmel\CG3662 PE=1 SV=1	8.541	8.375	8.464	8.248	8.661	8.353	8.831	8.761	8.315	8.865	1.1235	0.168	0.345
1987	LD07294p OS=Drosophila melanogaster GN=Tap42 PE=1 SV=2	7.737	7.822	7.687	7.806	7.82	7.693	7.646	7.542	7.796	7.684	0.93174	-0.102	0.216
1988	Transmembrane 9 superfamily member OS=Drosophila melanogaster GN=TM9SF4 PE=1 SV=1	9.062	9.197	9.145	9.073	8.87	9.118	9.055	9.038	9.152	8.988	1.00069	0.001	0.993
1989	Egalitarian, isoform B OS=Drosophila melanogaster GN=egl PE=1 SV=4	8.05	8.1	8.144	8.256	7.911	8.237	8.187	8.115	8.225	8.092	1.05629	0.079	0.412
1990	Vacuolar protein sorting-associated protein 29 OS=Drosophila melanogaster GN=Vps29 PE=1 SV=1	9.183	9.154	9.163	9.101	9.156	9.206	9.129	9.204	9.377	9.307	1.06659	0.093	0.24
1991	Beta-glucuronidase OS=Drosophila melanogaster GN=CG15117-RB PE=1 SV=1	8.675	8.742	8.539	8.702	9.287	8.362	8.643	8.727	8.469	8.823	0.880259	-0.184	0.344
1992	FI06027p OS=Drosophila melanogaster GN=TrpRS PE=1 SV=1	9.181	9.012	9.019	9.084	9.22	8.931	8.801	8.91	9.415	9.228	0.968618	-0.046	0.788
1993	tRNA-dihydrouridine(47) synthase [NAD(P)(+)] OS=Drosophila melanogaster GN=Dmel\CG10463 PE=1 SV=1	7.02	6.951	6.933	7.053	7.08	7.255	7.12	7.122	7.06	7.112	1.09126	0.126	0.107
1994	Phosphatidate cytidylyltransferase OS=Drosophila melanogaster GN=CdsA PE=1 SV=1	9.396	9.49	9.387	9.29	9.352	9.633	9.555	9.475	9.437	9.355	1.07773	0.108	0.232
1995	Uncharacterized protein, isoform A OS=Drosophila melanogaster GN=CG18067 PE=1 SV=1	9.7	8.179	10.589	8.391	8.871	8.876	9.4	8.762	9.356	8.963	0.949342	-0.075	0.908
1996	CCR4-NOT transcription complex subunit 4, isoform K OS=Drosophila melanogaster GN=Cnot4 PE=1 SV=1	7.439	7.459	7.573	7.471	7.266	7.765	7.64	7.49	7.681	7.511	1.12975	0.176	0.097
1997	Probable N-acetyltransferase san OS=Drosophila melanogaster GN=san PE=1 SV=1	8.047	8.112	8.069	8.121	8.113	8.18	8.127	8.267	8.335	8.201	1.09429	0.13	0.087
1998	HDC01001 OS=Drosophila melanogaster GN=Sfp26Ad PE=4 SV=1	9.716	9.755	9.229	9.267	10.225	10.053	10.847	10.751	10.03	10.776	1.80625	0.853	0.016
1999	Serine-arginine protein 55 OS=Drosophila melanogaster GN=B52 PE=1 SV=4	9.962	10.061	10.046	10.053	9.906	9.985	10.004	10.032	9.977	9.965	0.99103	-0.013	0.868
2000	LP18071p OS=Drosophila melanogaster GN=CG15347-RB PE=1 SV=1	7.735	7.465	7.672	7.375	8.005	7.295	7.856	7.944	7.891	8.395	1.16959	0.226	0.379
2001	Dual specificity mitogen-activated protein kinase kinase dSOR1 OS=Drosophila melanogaster GN=Dsor1 PE=1 SV=2	9.521	9.448	9.383	9.52	9.623	9.115	9.253	9.23	9.227	9.297	0.82645	-0.275	0.005
2002	Mitochondrial ribosomal protein L44 OS=Drosophila melanogaster GN=mRpL44 PE=1 SV=1	8.068	8.172	8.242	8.376	8.048	7.798	7.519	7.626	8.063	7.823	0.750019	-0.415	0.012
2003	Vesicle transport protein USE1 OS=Drosophila melanogaster GN=Use1 PE=2 SV=3	8.106	8.058	8.009	7.867	7.954	7.937	8.066	7.92	7.925	7.919	0.96929	-0.045	0.601
2004	CG3226 OS=Drosophila melanogaster GN=CG3226 PE=1 SV=1	8.984	8.938	8.737	8.826	9.169	8.876	9.117	9.023	9.323	9.312	1.1479	0.199	0.178
2005	Quaking related 58E-2, isoform A OS=Drosophila melanogaster GN=qkr58E-2 PE=1 SV=1	8.411	8.296	8.321	8.357	8.225	8.345	8.189	8.024	8.194	8.131	0.904379	-0.145	0.122
2006	Uncharacterized protein, isoform A OS=Drosophila melanogaster GN=Dmel\CG33301 PE=4 SV=3	8.895	8.911	8.709	8.769	9.228	8.327	8.554	8.6	8.452	8.554	0.755236	-0.405	0.01
2007	Tubulin gamma-1 chain OS=Drosophila melanogaster GN=gammaTub23C PE=1 SV=2	8.28	8.187	8.279	8.243	8.338	8.333	8.494	8.387	8.182	8.126	1.0274	0.039	0.726
2008	Uncharacterized protein, isoform C OS=Drosophila melanogaster GN=CG41099 PE=1 SV=1	8.188	8.19	8.183	8.058	8.16	8.412	8.433	8.339	8.398	8.412	1.18345	0.243	0.003
2009	Protein kintoun OS=Drosophila melanogaster GN=Nop17l PE=1 SV=1	7.881	8.157	7.902	7.981	8.093	8.394	8.297	8.196	8.193	8.139	1.18181	0.241	0.028
2010	CG8735, isoform A OS=Drosophila melanogaster GN=CG8735 PE=1 SV=1	8.661	8.575	8.595	8.676	8.589	8.349	8.42	8.425	8.432	8.48	0.871758	-0.198	0.01
2011	CG2004, isoform A OS=Drosophila melanogaster GN=CG2004 PE=1 SV=1	8.899	8.945	8.709	8.758	8.791	8.492	8.862	8.762	8.66	8.815	0.93174	-0.102	0.358
2012	FI02050p OS=Drosophila melanogaster GN=ninaD PE=1 SV=1	7.683	8.2	8.553	8.134	7.95	8.62	8.948	8.867	8.82	8.949	1.66671	0.737	0.003
2013	GEO01805p1 OS=Drosophila melanogaster GN=SkpB PE=2 SV=1	8.619	8.285	8.582	8.628	8.716	8.676	8.75	8.583	8.519	8.722	1.05995	0.084	0.484
2014	LD28815p OS=Drosophila melanogaster GN=Usp10 PE=1 SV=2	7.566	7.371	7.309	7.614	7.42	7.538	7.458	7.248	7.486	7.508	0.99447	-0.008	0.951
2015	Angiotensin-converting enzyme OS=Drosophila melanogaster GN=Ance-4 PE=1 SV=1	8.552	8.326	8.924	8.49	8.382	8.858	8.805	8.786	8.839	8.909	1.23542	0.305	0.042
2016	Uncharacterized protein, isoform B OS=Drosophila melanogaster GN=anon-SAGE:Wang-122 PE=3 SV=1	9.267	9.389	8.916	9.134	10.103	8.886	9.861	9.857	9.361	9.983	1.17121	0.228	0.526
2017	GH13495p OS=Drosophila melanogaster GN=CG10513 PE=1 SV=2	9.444	9.587	9.449	9.512	9.691	8.976	9.459	9.245	9.048	9.239	0.7884	-0.343	0.017
2018	Calmodulin-binding protein related to a Rab3 GDP/GTP exchange protein, isoform B OS=Drosophila melanogaster GN=Crag PE=1 SV=3	8.051	8.125	8.059	7.972	8.06	8.091	7.983	7.863	8.035	8.02	0.962594	-0.055	0.493
2019	FI18195p1 OS=Drosophila melanogaster GN=l(3)76BDm PE=1 SV=2	7.709	7.86	7.724	7.819	7.573	7.859	7.561	7.542	7.491	7.545	0.909408	-0.137	0.234
2020	RE23632p OS=Drosophila melanogaster GN=CG12746 PE=2 SV=1	8.411	8.501	8.291	8.3	8.362	8.454	8.778	8.824	8.358	8.641	1.17936	0.238	0.078
2021	Modular serine protease OS=Drosophila melanogaster GN=modSP PE=1 SV=2	7.064	6.964	6.891	6.756	7.074	7.103	7.111	7.157	6.83	7.176	1.09051	0.125	0.289
[truncated: 3,812 more rows]
